# Supplementary material for: Global Proteomic Profiling of <em>Piscirickettsia</em> <em>Salmonis</em> and Salmon Macrophage-Like Cells during Intracellular Infection
Source: Preprints.org preprint supplement (doi:10.20944/preprints202009.0106.v1), 2020-09-04
Supplement: Supplementary file 1 [file supplementary]

## Sheet: SHK1.Control.all.GOs
GO_acc	term_type	Term	queryitem	querytotal	%query	refitem	reftotal	%reference	fold-enrichment	pvalue	FDR	entries	entries_ref
GO:0009987	BP	cellular process	355	672	52.8274	23418	65384	35.8161	1.47496	3.3e-09	2.9e-07	// B5X441 // B5X291 // C0HAZ6 // B5X4F4 // B5XE29 // C0HBF1 // C0HBF4 // B5XGF6 // C0H7M1 // B3SUD0 // B5DG02 // C0PUJ4 // C0PUJ6 // B5DGL6 // C0PUJ3 // B5X368 // B5X369 // C0H9F4 // B5X165 // C0H9F2 // B9EQI9 // C0PU76 // B5X3K2 // B5X5R0 // B9EM17 // B9EP20 // B5DH21 // C0HAC0 // A7KIL2 // B5X8X3 // C0H9X1 // B5DGE8 // B5DGE0 // B5X6D9 // B3TDC3 // B5XAD3 // P84408 // Q2A132 // B3SU80 // B5X4F0…	// A0A1S3QDX6 // A0A1S3QDX4 // A0A1S3LYN0 // A0A1S3QDX9 // A0A1S3PLW5 // A0A1S3PLW0 // A0A1S3PLW1 // A0A1S3PLW3 // A0A1S3KXH5 // A0A1S3KXH0 // A0A1S3KXH2 // A0A1S3LQ98 // A0A1S3LQ97 // A0A1S3LQ95 // A0A1S3QNW8 // A0A1S3LM35 // A0A1S3LM34 // A0A1S3LM37 // A0A1S3QNW0 // A0A1S3QNW3 // B5X208 // B5X207 // B5X206 // B5X205 // B5X201 // A0A1S3Q7H3 // A0A1S3Q7H2 // A0A1S3T5G1 // A0A1S3S378 // C0H878 // …
GO:0008152	BP	metabolic process	244	672	36.3095	12382	65384	18.9374	1.91735	6.9e-17	2.3e-14	// B5XG11 // B5DGK7 // B5X441 // B5X1C1 // Q9DE54 // B5X6P4 // Q1A3D7 // C0H8R1 // C0HA69 // C0HAZ6 // B5X4F4 // C0HAA0 // B5XE16 // B5XE29 // B9EL39 // C0HBF1 // C0H9J3 // B9EMD6 // B5DGC6 // C0H904 // B5XGF6 // B5DG81 // B5RI28 // C0H7M1 // C0HA85 // B5DG02 // B5XD97 // B5X225 // C0PUU2 // A0A0G3B776 // B5DGL6 // B5X3Q3 // C0PUJ3 // B5X6L7 // B5X8Y4 // C7C1L7 // B5X368 // B5X369 // C0H9F4 // C0…	// A0A1S3QDX6 // A0A1S3QDX4 // A0A1S3NPT8 // A0A1S3QG24 // A0A1S3PJM7 // A0A1S3S8M2 // A0A1S3KXH5 // C0HBF1 // C0HBF0 // A0A1S3KXH0 // C0HBF6 // A0A1S3KXH2 // C0H9S3 // A0A1S3RQS6 // A0A1S3MF27 // A0A1S3MF22 // A0A1S3LLZ4 // A0A1S3LQ97 // A0A1S3LVB7 // A0A1S3MF29 // A0A1S3NZJ4 // A0A1S3QNW5 // A0A1S3LM37 // A0A1S3LM30 // A0A1S3QNW3 // A0A1S3NF09 // B5XGH2 // A0A1S3KJB2 // B5X8F5 // B5X207 // B5X2…
GO:0044237	BP	cellular metabolic process	228	672	33.9286	11323	65384	17.3177	1.95919	5.6e-17	2.3e-14	// B5XG11 // B5DGK7 // B5X441 // Q9DE54 // B5X212 // B9ELK0 // C0H8R1 // C0HA69 // C0HAZ6 // B5X4F4 // C0HAA0 // B5XE16 // B5XE29 // B9EL39 // C0HBF1 // C0H9J3 // B9EMD6 // B5DGC6 // C0H904 // B5XGF6 // B5DG81 // C0H7M1 // C0HA85 // B5DG02 // B5XD97 // B5X225 // B5X6P4 // C0PUJ6 // B5DGL6 // B5X3Q3 // B5X6L7 // B5X8Y4 // B5X368 // B5X369 // C0H9F4 // C0HAB9 // B5X165 // B5DGK9 // B5X392 // C0HA77…	// A0A1S3QDX6 // A0A1S3QDX4 // A0A1S3NPT8 // A0A1S3QG24 // A0A1S3PJM7 // A0A1S3S8M2 // A0A1S3KXH5 // C0HBF1 // C0HBF0 // A0A1S3KXH0 // C0HBF6 // A0A1S3KXH2 // A0A1S3RQS6 // A0A1S3MF27 // A0A1S3MF22 // A0A1S3LLZ4 // A0A1S3LQ97 // A0A1S3MF29 // A0A1S3NZJ4 // A0A1S3QNW5 // A0A1S3LM37 // A0A1S3LM30 // A0A1S3QNW3 // A0A1S3NF09 // B5XGH2 // A0A1S3KJB2 // B5X8F5 // B5X207 // B5X205 // A0A1S3NF04 // B5X2…
GO:0044238	BP	primary metabolic process	211	672	31.3988	10642	65384	16.2762	1.92913	2e-15	4.8e-13	// B5XG11 // B5DGK7 // B5X441 // Q9DE54 // B9ELK0 // C0H8R1 // C0HA69 // C0HAZ6 // B5X4F4 // C0HAA0 // B5XE29 // B9EL39 // C0HBF1 // B9EMD6 // B5DGC6 // C0H904 // C0H9E7 // B5DG81 // B5RI28 // C0H7M1 // C0HA85 // B5DG02 // B5XD97 // B5X225 // C0PUU2 // C0PUJ6 // B5DGL6 // B5X3Q3 // B5X6L7 // B5X8Y4 // B5X368 // B5X369 // C0H9F4 // C0HAB9 // B5X165 // B5DGK9 // B5X392 // C0HA77 // B5DGU4 // B5X4A4…	// A0A1S3PJM7 // A0A1S3S8M2 // A0A1S3KXH5 // C0HBF1 // A0A1S3RBU5 // A0A1S3KXH0 // C0HBF6 // A0A1S3KXH2 // A0A1S3RQS6 // A0A1S3MF27 // A0A1S3LLZ4 // A0A1S3LQ97 // A0A1S3LVB7 // A0A1S3MF29 // A0A1S3QNW5 // A0A1S3LM37 // A0A1S3LM30 // A0A1S3QNW3 // A0A1S3NF09 // B5XGH2 // A0A1S3KJB2 // B5X8F5 // B5X207 // B5X205 // A0A1S3NF04 // B5X201 // A0A1S3LBR6 // A0A1S3MTH5 // A0A1S3RSI5 // A0A1S3RQ86 // A0A1…
GO:0043170	BP	macromolecule metabolic process	177	672	26.3393	8557	65384	13.0873	2.01258	5.4e-15	1.1e-12	// B5XG11 // B5DGK7 // B5X441 // B9ELK0 // Q9DE54 // Q1A3D7 // C0H8R1 // C0HA69 // C0HAZ6 // B5X4F4 // B5XE29 // B9EL39 // C0HBF1 // B9EMD6 // B9ENF4 // B5DG81 // B5RI28 // C0H7M1 // C0HA85 // B5DG02 // C0HAB6 // B5X225 // C0PUU2 // C0PUJ6 // B5DGL6 // C0PUJ3 // B5X6L7 // B5X8Y4 // C7C1L7 // B5X368 // B5X369 // C0HAB9 // B5X165 // B5DGK9 // B5X392 // C0HA77 // B5DGU4 // B5X4A4 // C0H7C6 // B5X2M8…	// A0A1S3PJM7 // A0A1S3S8M2 // A0A1S3KXH5 // C0HBF1 // C0HBF0 // A0A1S3KXH0 // C0HBF6 // A0A1S3KXH2 // A0A1S3RQS6 // A0A1S3MF27 // A0A1S3LQ97 // A0A1S3MF29 // A0A1S3QNW5 // A0A1S3LM37 // A0A1S3LM30 // A0A1S3QNW3 // A0A1S3NF09 // B5XGH2 // B5X8F1 // B5X8F5 // B5X207 // A0A1S3NF04 // B5X201 // A0A1S3LBR6 // A0A1S3RSI8 // A0A1S3RSI5 // A0A1S3RSI2 // A0A1S3M8G3 // A0A1S3R396 // A0A1S3Q7H3 // A0A1S3T5…
GO:0044260	BP	cellular macromolecule metabolic process	167	672	24.8512	8216	65384	12.5658	1.97769	9.1e-14	1.7e-11	// B5XG11 // B5DGK7 // B5X441 // Q9DE54 // B9ELK0 // C0H8R1 // C0HA69 // C0HAZ6 // B5X4F4 // B5XE29 // B9EL39 // C0HBF1 // B9EMD6 // B9ENF4 // B5DG81 // C0H7M1 // C0HA85 // B5DG02 // C0HAB6 // B5X225 // C0PUJ6 // B5DGL6 // B5X6L7 // B5X8Y4 // B5X368 // B5X369 // C0HAB9 // B5X165 // B5DGK9 // B5X392 // C0HA77 // B5DGU4 // B5X4A4 // C0H7C6 // B5X2M8 // B5X3K2 // B5X5R0 // B5DG94 // B9EM17 // B5X4V1…	// A0A1S3PJM7 // A0A1S3S8M2 // A0A1S3KXH5 // C0HBF1 // C0HBF0 // A0A1S3KXH0 // C0HBF6 // A0A1S3KXH2 // A0A1S3RQS6 // A0A1S3MF27 // A0A1S3LQ97 // A0A1S3MF29 // A0A1S3QNW5 // A0A1S3LM37 // A0A1S3LM30 // A0A1S3QNW3 // A0A1S3NF09 // B5XGH2 // B5X8F1 // B5X8F5 // B5X207 // A0A1S3NF04 // B5X201 // A0A1S3LBR6 // A0A1S3RSI8 // A0A1S3RSI5 // A0A1S3RSI2 // A0A1S3M8G3 // A0A1S3R396 // A0A1S3Q7H3 // A0A1S3T5…
GO:0019538	BP	protein metabolic process	112	672	16.6667	3306	65384	5.05628	3.29623	1.1e-24	1.9e-21	// B5DGK7 // B5XG11 // B5X441 // Q9DE54 // C0H8R1 // B5X4F4 // B9ENW6 // C0HBF1 // B5DG81 // B5RI28 // C0H7M1 // B5X225 // B5DG02 // C0HAB6 // C0PUJ6 // B5DGL6 // B5X6L7 // B5X368 // B5XDA7 // C0HAB9 // B5DGK9 // B5DGU4 // B5X4A4 // B5X2M8 // B5DG94 // B9EP20 // B5DH21 // B5XEW6 // C0HAC7 // C0H7H1 // B5DGV7 // B5DGV2 // C0HAC0 // A7KIL2 // B5X3E4 // B5X8X3 // B9EQH8 // B5X6N3 // B5DGW2 // B5X5S8…	// B9EPU0 // A0A1S3NPT8 // B5X441 // B5X440 // B9EPU7 // A0A1S3Q9L2 // A0A1S3MGC5 // A0A1S3LZC5 // A0A1S3NA10 // A0A1S3P6Z5 // B5RI65 // B9EM04 // A0A1S3S8M2 // B5RI62 // C0HBF1 // C0HBF0 // A0A1S3KXH0 // B9EQ59 // A0A1S3N5L0 // A0A1S3R8T8 // A0A1S3SF11 // A0A1S3SF13 // A0A1S3SF12 // A0A1S3RQS6 // B5X599 // A0A1S3KVL6 // A0A1S3RDI1 // A0A1S3SZN7 // B5X841 // A0A1S3QCH0 // A0A1S3QCH2 // A0A1S3MSB2…
GO:0044267	BP	cellular protein metabolic process	108	672	16.0714	3189	65384	4.87734	3.29512	6.7e-24	5.5e-21	// B5DGK7 // B5XG11 // B5X441 // Q9DE54 // C0H8R1 // B5X4F4 // B9ENW6 // C0HBF1 // B5DG81 // C0H7M1 // B5X225 // B5DG02 // C0HAB6 // C0PUJ6 // B5DGL6 // B5X6L7 // B5X368 // B5XDA7 // C0HAB9 // B5DGK9 // B5DGU4 // B5X4A4 // B5X2M8 // B5DG94 // B9EP20 // B5DH21 // B5XEW6 // B5XCP6 // C0H7H1 // B5DGV7 // B5DGV2 // C0HAC0 // A7KIL2 // B5X3E4 // B5X8X3 // B9EQH8 // B5X6N3 // B5DGW2 // B5X5S8 // Q6XR07…	// B9EPU0 // A0A1S3NPT8 // B5X441 // B5X440 // B9EPU7 // A0A1S3Q9L2 // A0A1S3MGC5 // A0A1S3LZC5 // A0A1S3NA10 // A0A1S3P6Z5 // B5RI65 // B9EM04 // A0A1S3S8M2 // B5RI62 // C0HBF1 // C0HBF0 // A0A1S3KXH0 // B9EQ59 // A0A1S3R8T8 // A0A1S3SF11 // A0A1S3SF13 // A0A1S3SF12 // A0A1S3RQS6 // B5X599 // A0A1S3KVL6 // A0A1S3RDI1 // A0A1S3SZN7 // B5X841 // A0A1S3QCH0 // A0A1S3QCH2 // A0A1S3MSB2 // A0A1S3MSB1…
GO:0009058	BP	biosynthetic process	107	672	15.9226	6136	65384	9.38456	1.69668	1e-06	3.6e-05	// B5DGK7 // B5X1C1 // B5DGK9 // B5X212 // C0H8R1 // B5X215 // B5X4F4 // B5DGC6 // C0H9E7 // C0H7M1 // B5XAD3 // B5DG02 // A0A0G3B776 // B5DGL6 // B5X8Y4 // B5X368 // B5X369 // C0HA77 // B5X5R0 // B9EP20 // B5DH21 // B5X195 // B5XEW6 // B5XCP6 // C0H7H1 // B5DGV7 // B5DGM5 // B5DGV2 // B5DGW2 // B5X674 // A7KIL2 // B5X8X3 // B5X3E6 // B5XFD3 // C0H9P1 // B5X5S8 // Q3YBN1 // B3SUD0 // B3SU80 // C0…	// A0A1S3S8M2 // A0A1S3KXH5 // A0A1S3KXH0 // C0HBF6 // A0A1S3MF27 // A0A1S3LQ97 // A0A1S3LVB7 // A0A1S3MF29 // A0A1S3QNW5 // A0A1S3LM37 // A0A1S3LM30 // A0A1S3QNW3 // A0A1S3NF09 // B5XGH2 // A0A1S3KJB2 // B5X205 // A0A1S3NF04 // B5X201 // A0A1S3QGC3 // A0A1S3RSI8 // A0A1S3RSI2 // A0A1S3R396 // A0A1S3Q7H3 // A0A1S3T5G1 // A0A1S3S378 // A0A1S3P2X9 // A0A1S3RAS3 // A0A1S3P2X2 // A0A1S3P2X7 // A0A1S3…
GO:0044249	BP	cellular biosynthetic process	105	672	15.625	5933	65384	9.07409	1.72194	6.6e-07	2.5e-05	// B5DGK7 // B5DGK9 // B5X212 // C0H8R1 // B5X215 // B5X4F4 // B5DGC6 // B5XFF3 // C0H7M1 // B3SUD0 // B5DG02 // C0PUJ6 // B5DGL6 // B5X8Y4 // B5X368 // B5X369 // C0HA77 // B5X5R0 // B9EP20 // B5DH21 // B5X195 // B5XEW6 // B5XCP6 // C0H7H1 // B5DGV7 // B5DGM5 // B5DGV2 // B5DGW2 // B5X674 // A7KIL2 // B5X8X3 // B5X3E6 // B5XFD3 // C0H9P1 // B5X5S8 // Q3YBN1 // B5XAD3 // B3SU80 // C0H7C6 // C0H945…	// A0A1S3S8M2 // A0A1S3KXH5 // A0A1S3KXH0 // C0HBF6 // A0A1S3MF27 // A0A1S3LQ97 // A0A1S3MF29 // A0A1S3QNW5 // A0A1S3LM37 // A0A1S3LM30 // A0A1S3QNW3 // A0A1S3NF09 // B5XGH2 // A0A1S3KJB2 // A0A1S3NF04 // B5X201 // A0A1S3QGC3 // A0A1S3RSI8 // A0A1S3RSI2 // A0A1S3R396 // A0A1S3Q7H3 // A0A1S3T5G1 // A0A1S3S378 // A0A1S3P2X9 // A0A1S3RAS3 // A0A1S3P2X2 // A0A1S3P2X7 // A0A1S3SQ66 // A0A1S3L9T9 // A0…
GO:0010467	BP	gene expression	93	672	13.8393	5099	65384	7.79854	1.7746	7.5e-07	2.8e-05	// B5DGK7 // B5DGK9 // Q1A3D7 // C0H8R1 // C0HA69 // C0HAZ6 // B9ENF4 // C0H7M1 // B5DG02 // B5DGL6 // C0PUJ3 // B5X8Y4 // B3SU80 // B5X368 // B5X369 // B5X5R0 // B5X4V1 // B9EP20 // B5DH21 // C6KE15 // B5XCP6 // C0H7H1 // B5DGV7 // B5DGV2 // B5DGV3 // B5X674 // A7KIL2 // B5X8X3 // B5XFD3 // C0H9P1 // B5DGW2 // B5X5S8 // B9EMD6 // B3SUD0 // C7C1L7 // C0PUB5 // C0H7C6 // B3SUB4 // B5XF23 // B5X668…	// B9EPU0 // A0A1S3RMI1 // B5XC34 // A0A1S3LK00 // B9ELV8 // A0A1S3LZC7 // A0A1S3LCY7 // A0A1S3RU05 // A0A1S3MT38 // A0A1S3P6R5 // B5RI65 // B5X9J1 // A0A1S3LP47 // A0A1S3LME4 // A0A1S3N5L6 // A0A1S3KXH5 // B9ENF8 // A0A1S3MJW6 // C0HBF6 // A0A1S3N5L0 // A0A1S3LQZ5 // A0A1S3R8T6 // A0A1S3MAD6 // A0A1S3R8T3 // C0H773 // B5X599 // A0A1S3S6J4 // A0A1S3QP54 // B3SUD0 // A0A1S3N3P1 // A0A1S3QPN9 // A0…
GO:0034645	BP	cellular macromolecule biosynthetic process	75	672	11.1607	4736	65384	7.24336	1.54082	0.00044	0.0092	// B5X3A5 // B5XCP6 // B9ELK0 // B5DGV2 // C0H7H1 // B3SUB4 // B5DGX5 // A7KIL2 // B5XF23 // B5X8X3 // B5DGX1 // C0HAX5 // B5XFD3 // B9EL07 // C0H9P1 // B5X0W4 // B5DGK9 // B5X4F4 // B5X817 // B5X497 // B5XGM4 // B5XF07 // B5X5T8 // C0HA22 // B5DGV3 // B5X5S8 // B5XDA7 // B9EPT0 // B5XG87 // C0H7M1 // B3SUD0 // B5DG02 // B5DGJ6 // B3SU80 // B5DG42 // B5DGK7 // C0PUU2 // B5X8Y4 // B5DGW2 // C0PUJ6…	// B9EPU0 // A0A1S3P8D4 // A0A1S3KPS0 // A0A1S3R0H5 // A0A1S3T5Z2 // B9ELV8 // A0A1S3LZC7 // A0A1S3LCY7 // A0A1S3M043 // A0A1S3MT38 // B5RI65 // B5X9J1 // A0A1S3S8M2 // B5RI62 // A0A1S3LME4 // A0A1S3N5L6 // A0A1S3KXH5 // B9ENF8 // A0A1S3MJW6 // A0A1S3KXH0 // C0HBF6 // A0A1S3R8T8 // A0A1S3SF11 // A0A1S3R8T6 // A0A1S3SF13 // A0A1S3R8T3 // C0H773 // B5X599 // A0A1S3S6J4 // A0A1S3MF27 // A0A1S3SZN7 /…
GO:0009059	BP	macromolecule biosynthetic process	75	672	11.1607	4752	65384	7.26783	1.53563	0.00048	0.0099	// B5X3A5 // B5XCP6 // B9ELK0 // B5DGV2 // C0H7H1 // B3SUB4 // B5DGX5 // A7KIL2 // B5XF23 // B5X8X3 // B5DGX1 // C0HAX5 // B5XFD3 // B9EL07 // C0H9P1 // B5X0W4 // B5DGK9 // B5X4F4 // B5X817 // B5X497 // B5XGM4 // B5XF07 // B5X5T8 // C0HA22 // B5DGV3 // B5X5S8 // B5XDA7 // B9EPT0 // B5XG87 // C0H7M1 // B3SUD0 // B5DG02 // B5DGJ6 // B3SU80 // B5DG42 // B5DGK7 // C0PUU2 // B5X8Y4 // B5DGW2 // C0PUJ6…	// B9EPU0 // A0A1S3P8D4 // A0A1S3KPS0 // A0A1S3R0H5 // A0A1S3T5Z2 // B9ELV8 // A0A1S3LZC7 // A0A1S3LCY7 // A0A1S3M043 // A0A1S3MT38 // B5RI65 // B5X9J1 // A0A1S3S8M2 // B5RI62 // A0A1S3LME4 // A0A1S3N5L6 // A0A1S3KXH5 // B9ENF8 // A0A1S3MJW6 // A0A1S3KXH0 // C0HBF6 // A0A1S3R8T8 // A0A1S3SF11 // A0A1S3R8T6 // A0A1S3SF13 // A0A1S3R8T3 // C0H773 // B5X599 // A0A1S3S6J4 // A0A1S3MF27 // A0A1S3SZN7 /…
GO:0044281	BP	small molecule metabolic process	68	672	10.119	2463	65384	3.76698	2.68625	4.6e-12	6.9e-10	// B5X3A5 // B5XCP6 // B5X4B1 // B5X4B0 // B5DGM5 // B5X252 // B5X1I0 // C0H9X1 // C0HA42 // B5X0U6 // B5X215 // C0H9P1 // I0J1J2 // I0J1J3 // B5XG51 // C0HAA0 // B5XE29 // B5XCJ8 // B5XFJ9 // B5DGE0 // C0H8G6 // C0H904 // C0H9C1 // B5DGS2 // B5X434 // C0H868 // B5X2W8 // B5XAD3 // B5X8U4 // B5XD97 // Q7ZZK9 // Q7ZZK8 // B5XCD3 // B5X3H5 // C0H820 // B5X3Q3 // Q3YBN1 // B5X248 // B5XBW6 // C0H9I1…	// A0A1S3QDX4 // A0A1S3N0A3 // A0A1S3NI26 // A0A1S3Q5Y4 // A0A1S3MP04 // A0A1S3MSE8 // A0A1S3LSB6 // A0A1S3LME1 // A0A1S3R6Y8 // C0H9M4 // B5X597 // B5X0Q7 // A0A1S3KP55 // A0A1S3PPW1 // A0A1S3LVB7 // C0PU89 // C0H9F4 // A0A1S3KJB2 // A0A1S3N7Y1 // A0A1S3QF15 // A0A1S3QPG7 // B5X205 // B5X5R6 // A0A1S3S977 // A0A1S3S970 // A0A1S3MTH5 // A0A1S3MIQ1 // A0A1S3R2A6 // A0A1S3S979 // A0A1S3R401 // A0A1…
GO:0006412	BP	translation	51	672	7.58929	845	65384	1.29237	5.8724	1.3e-22	7.1e-20	// B5X3A5 // B5XCP6 // B9ELK0 // B5DGV2 // C0H7H1 // B5DGX5 // A7KIL2 // B5DGX3 // B5X8X3 // B5DGX1 // B5DGV7 // C0H8R1 // C0H9P1 // B5X0W4 // B5DGK9 // B9EL07 // B5DGV3 // B5X5S8 // C0H7M1 // B5X3Q6 // B5DG02 // B5DG42 // B5DGK7 // C0H7C6 // B5DGW2 // B5DGL6 // B5X668 // B5XBW2 // B5DGY4 // B9ENX2 // B5DGW8 // B5XF07 // B5X369 // B5XDA7 // B5X6R2 // B5X4E3 // B5X340 // B5DGJ6 // B5X7R3 // B9ELY8…	// B9EPU0 // A0A1S3Q570 // B9EQB9 // C0H7J7 // A0A1S3QPN9 // A0A1S3N6S7 // A0A1S3RR63 // B5X8V1 // B5XC98 // B5RI65 // B5X9J1 // B5X7S7 // A0A1S3Q8P8 // B5XC93 // C0H8C7 // A0A1S3PT98 // B5X599 // A0A1S3SLS0 // B5X7J4 // B5X610 // C0H7M1 // C0H7M0 // B5DG02 // B5DG01 // B5X841 // B5X840 // C0H7M9 // A0A1S3MUA7 // A0A1S3MSB2 // B5XCH8 // B5DGL2 // B5DGL6 // A0A1S3R084 // B5DGL8 // B5X369 // A0A1S3…
GO:0009056	BP	catabolic process	50	672	7.44048	1669	65384	2.55261	2.91485	1.5e-10	1.9e-08	// C0HAC7 // B5XG11 // B5X4B0 // B5X441 // C0HAC0 // C0HBT3 // Q9DE54 // B5X392 // C0HA42 // B5X6P4 // B5X0U6 // B5XCL4 // C0H9T3 // C0PUV0 // C0H935 // I0J1J2 // I0J1J3 // C0H9I1 // B5X0R8 // C0H8K1 // B5RI28 // B5XGI9 // C0H8V2 // B5DGS2 // B5XFJ9 // C0HA85 // B5XDC1 // B5DG42 // B5XFA3 // C0H820 // C0H9L3 // B5X6N3 // B5X6L7 // B5X4M3 // B5X1B5 // C0H9F4 // C0HAB9 // B5X165 // C0H8W2 // B5DGU4…	// A0A1S3QUL8 // B5X441 // B9EPU7 // A0A1S3QG24 // A0A1S3NDY3 // A0A1S3R719 // A0A1S3LSB6 // B9ELV6 // A0A1S3MAK7 // B9EQ59 // A0A1S3MZY9 // A0A1S3SF12 // A0A1S3RQS6 // A0A1S3RDI1 // A0A1S3MF22 // A0A1S3KVL3 // A0A1S3QCH0 // A0A1S3MAY6 // C0H9F4 // C0HB88 // A0A1S3RR12 // A0A1S3KHZ2 // A0A1S3MIQ1 // A0A1S3T3E6 // A0A1S3RAA9 // A0A1S3QTW1 // C0HAC7 // C0HAC0 // B5XG31 // C0HAC8 // A0A1S3LGS1 // A0…
GO:0044248	BP	cellular catabolic process	45	672	6.69643	1469	65384	2.24673	2.98053	5.6e-10	6.7e-08	// B5XG11 // B5X4B0 // B5X441 // C0HAC0 // C0HBT3 // Q9DE54 // B5X392 // B5X0R8 // B5X6P4 // B5X0U6 // B5XCL4 // C0H9T3 // C0PUV0 // C0H935 // I0J1J2 // I0J1J3 // C0H9I1 // C0H8K1 // B5XGI9 // B5DGS2 // B5XFJ9 // C0HA85 // B5XDC1 // B5DG42 // B5X3H5 // C0H820 // C0H9L3 // B5X6N3 // B5X6L7 // B5X4M3 // B5X1B5 // C0H9F4 // C0HAB9 // B5X165 // C0H8W2 // B5DGU4 // B5X4A4 // B5X3K2 // C0H856 // B5X3V1…	// A0A1S3QUL8 // B5X441 // B9EPU7 // A0A1S3QG24 // A0A1S3NDY3 // A0A1S3LSB6 // B9ELV6 // B9EQ59 // A0A1S3MZY9 // A0A1S3SF12 // A0A1S3RQS6 // A0A1S3RDI1 // A0A1S3MF22 // A0A1S3KVL3 // A0A1S3QCH0 // C0H9F4 // C0HB88 // A0A1S3RR12 // A0A1S3KHZ2 // A0A1S3MIQ1 // A0A1S3T3E6 // A0A1S3RAA9 // A0A1S3QTW1 // C0HAC0 // B5XG31 // A0A1S3LGS1 // A0A1S3LGS0 // A0A1S3SSF5 // A0A1S3LGS5 // A0A1S3LGS4 // A0A1S3SJ…
GO:0009057	BP	macromolecule catabolic process	40	672	5.95238	1010	65384	1.54472	3.85337	2.9e-12	4.8e-10	// C0HAC7 // B5XG11 // B5X4B0 // B5X441 // C0HAC0 // C0HBT3 // Q9DE54 // B5X392 // B5X0R8 // B5X0U6 // B5XCL4 // C0PUV0 // C0H9T3 // I0J1J2 // I0J1J3 // C0H9I1 // C0H8K1 // B5RI28 // C0H8V2 // C0HA85 // B5DG42 // B5XFA3 // C0H9L3 // B5X6N3 // B5X6L7 // B5X4M3 // B5X1B5 // C0HAB9 // B5X165 // B5DGU4 // B5X4A4 // B5X3K2 // C0H856 // B5X3H5 // B5X3V1 // B5XE29 // B9EM17 // B5XGI9 // B5DG53 // B5DFX8	// A0A1S3SXI2 // C0H7J5 // B5XAV2 // A0A1S3LFV3 // B9EPU7 // A0A1S3LFL0 // A0A1S3MDV4 // B5X6M2 // A0A1S3NDY3 // A0A1S3PKS8 // B5XB51 // A0A1S3LSB6 // A0A1S3KMG9 // A0A1S3M1W8 // B5XC96 // B9ELV6 // B5XE29 // A0A1S3QX88 // A0A1S3PFE0 // A0A1S3L946 // B5XA59 // B5XA57 // B5XGF1 // A0A1S3MZY9 // A0A1S3SF12 // A0A1S3RQS6 // B5XA50 // A0A1S3RDI1 // A0A1S3PDQ4 // A0A1S3MUA9 // A0A1S3MYK8 // B5XFW6 // …
GO:0044265	BP	cellular macromolecule catabolic process	36	672	5.35714	953	65384	1.45754	3.67546	1.1e-10	1.6e-08	// B5XG11 // B5X4B0 // B5X441 // C0HAC0 // C0HBT3 // Q9DE54 // B5X392 // B5X0R8 // B5X0U6 // B5XCL4 // C0PUV0 // C0H9T3 // I0J1J2 // I0J1J3 // C0H9I1 // C0H8K1 // C0HA85 // B5DG42 // B5X3H5 // C0H9L3 // B5X6N3 // B5X6L7 // B5X4M3 // B5X1B5 // C0HAB9 // B5X165 // B5DGU4 // B5X4A4 // B5X3K2 // C0H856 // B5X3V1 // B5XE29 // B9EM17 // B5XGI9 // B5DG53 // B5DFX8	// A0A1S3SXI2 // C0H7J5 // B5XAV2 // A0A1S3LFV3 // B9EPU7 // A0A1S3LFL0 // A0A1S3MDV4 // A0A1S3NDY3 // A0A1S3PKS8 // B5XB51 // A0A1S3LSB6 // A0A1S3KMG9 // A0A1S3M1W8 // B5XC96 // B9ELV6 // B5XE29 // A0A1S3QX88 // A0A1S3PFE0 // A0A1S3L946 // B5XA59 // B5XA57 // B5XGF1 // A0A1S3MZY9 // A0A1S3SF12 // A0A1S3RQS6 // B5XA50 // A0A1S3RDI1 // A0A1S3PDQ4 // A0A1S3MUA9 // A0A1S3MYK8 // B5XFW6 // A0A1S3QCH0…
GO:0065008	BP	regulation of biological quality	29	672	4.31548	1402	65384	2.14426	2.01258	0.00052	0.01	// C0HAC0 // B5X291 // B5X9Q1 // B5X8H5 // B5X9L4 // C0H8V6 // C0HB31 // C0HBF4 // B5X5Q6 // B5X1H7 // C0PU90 // Q2L6S9 // B5X3J5 // A0A0G3B776 // B5X3B4 // B5X348 // B5XAK2 // B5RIB0 // B5X4A7 // D0QEL0 // B5X2M7 // C0PU35 // B5X3R3 // B5X3I9 // C0PU58 // C0H8R1 // C0PU56 // B5X7X7 // B5DG56	// A0A1S3LSB6 // A0A1S3LSB9 // A0A1S3LME5 // A0A1S3KXH2 // A0A1S3KXH3 // A0A1S3QAD3 // A0A1S3MF23 // A0A1S3MF21 // B5X847 // A0A1S3Q4N4 // A0A1S3R7G7 // A0A1S3RBG3 // A0A1S3N1V0 // A0A1S3QNW0 // A0A1S3PBL4 // A0A1S3PBL0 // A0A1S3PZM8 // P49946 // P49947 // B5X5R2 // A0A1S3RSI1 // A0A1S3SHA9 // A0A1S3MVD8 // A0A1S3PXQ0 // A0A1S3LAU1 // C0HAC0 // A0A1S3LLA1 // A0A1S3R9B0 // A0A1S3QVM0 // A0A1S3L4X2…
GO:0044085	BP	cellular component biogenesis	29	672	4.31548	1528	65384	2.33696	1.84662	0.0018	0.033	// B5X4P2 // C0H9I5 // C0HAZ6 // B5X0W4 // P84408 // B5XCW2 // B5XFF0 // C0H8G4 // B5XCB1 // C0HA85 // B9EMD3 // C0H823 // B5XDP1 // E6Y364 // B9ELD5 // B5XF07 // B5X8F3 // C0H9F2 // B5DGS1 // B5X7V8 // B5XA67 // B5XAA0 // B5X1P2 // B5X2M7 // C0PU35 // B5DGD5 // B5X3R3 // B5X4H4 // B5DG56	// A0A1S3QMM5 // B9EPU6 // A0A1S3SUC3 // B5X449 // A0A1S3LCY7 // A0A1S3P6R5 // B5X9J4 // B9EQ58 // B9EPH6 // C0H9S0 // A0A1S3LQ97 // A0A1S3RBG3 // B5X8F3 // C0H9F5 // A0A1S3RQE9 // C0H9F2 // A0A1S3RR14 // B5X5R2 // A0A1S3R409 // A0A1S3PFL3 // A0A1S3RUU8 // A0A1S3LWZ7 // A0A1S3LAU1 // A0A1S3S9A8 // A0A1S3S9A9 // A0A1S3S9A6 // A0A1S3S9A7 // A0A1S3S9A4 // A0A1S3S9A5 // A0A1S3S9A2 // A0A1S3S9A1 // A0…
GO:0043436	BP	oxoacid metabolic process	25	672	3.72024	742	65384	1.13483	3.27822	5.3e-07	2.1e-05	// B5X3A5 // B5XCP6 // B5X4B1 // C0H9P1 // B5XG51 // B5XFJ9 // C0H9C1 // B5DGS2 // B5X434 // C0H820 // Q7ZZK9 // Q7ZZK8 // Q3YBN1 // C0HA51 // B5X4E3 // B5X4R5 // B5X340 // Q7ZZL0 // B5XAM9 // C0HA17 // B5X1I0 // B5X4T8 // B5X1V6 // C0H935 // B5X2K3	// A0A1S3MSE8 // A0A1S3MSE9 // B5X4R5 // A0A1S3RIQ4 // A0A1S3M2M9 // A0A1S3RM23 // B5XB51 // A0A1S3Q5S7 // A0A1S3N0K4 // A0A1S3L087 // C0H9M4 // A0A1S3P7Z9 // A0A1S3PLM1 // A0A1S3KL22 // A0A1S3KL23 // A0A1S3N2K1 // A0A1S3ME44 // C0H9P1 // B5XGF7 // A0A1S3RIX0 // A0A1S3KPC7 // A0A1S3MYK9 // A0A1S3RNL9 // A0A1S3MUA7 // A0A1S3MUA3 // B5DGL3 // C0PU89 // A0A1S3P376 // B9EMU9 // A0A1S3KJB2 // A0A1S3NW…
GO:0019752	BP	carboxylic acid metabolic process	25	672	3.72024	742	65384	1.13483	3.27822	5.3e-07	2.1e-05	// B5X3A5 // B5XCP6 // B5X4B1 // C0H9P1 // B5XG51 // B5XFJ9 // C0H9C1 // B5DGS2 // B5X434 // C0H820 // Q7ZZK9 // Q7ZZK8 // Q3YBN1 // C0HA51 // B5X4E3 // B5X4R5 // B5X340 // Q7ZZL0 // B5XAM9 // C0HA17 // B5X1I0 // B5X4T8 // B5X1V6 // C0H935 // B5X2K3	// A0A1S3MSE8 // A0A1S3MSE9 // B5X4R5 // A0A1S3RIQ4 // A0A1S3M2M9 // A0A1S3RM23 // B5XB51 // A0A1S3Q5S7 // A0A1S3N0K4 // A0A1S3L087 // C0H9M4 // A0A1S3P7Z9 // A0A1S3PLM1 // A0A1S3KL22 // A0A1S3KL23 // A0A1S3N2K1 // A0A1S3ME44 // C0H9P1 // B5XGF7 // A0A1S3RIX0 // A0A1S3KPC7 // A0A1S3MYK9 // A0A1S3RNL9 // A0A1S3MUA7 // A0A1S3MUA3 // B5DGL3 // C0PU89 // A0A1S3P376 // B9EMU9 // A0A1S3KJB2 // A0A1S3NW…
GO:0006082	BP	organic acid metabolic process	25	672	3.72024	743	65384	1.13636	3.27381	5.4e-07	2.1e-05	// B5X3A5 // B5XCP6 // B5X4B1 // C0H9P1 // B5XG51 // B5XFJ9 // C0H9C1 // B5DGS2 // B5X434 // C0H820 // Q7ZZK9 // Q7ZZK8 // Q3YBN1 // C0HA51 // B5X4E3 // B5X4R5 // B5X340 // Q7ZZL0 // B5XAM9 // C0HA17 // B5X1I0 // B5X4T8 // B5X1V6 // C0H935 // B5X2K3	// A0A1S3MSE8 // A0A1S3MSE9 // B5X4R5 // A0A1S3RIQ4 // A0A1S3M2M9 // A0A1S3RM23 // B5XB51 // A0A1S3Q5S7 // A0A1S3N0K4 // A0A1S3L087 // C0H9M4 // A0A1S3P7Z9 // A0A1S3PLM1 // A0A1S3KL22 // A0A1S3KL23 // A0A1S3N2K1 // A0A1S3ME44 // C0H9P1 // B5XGF7 // A0A1S3RIX0 // A0A1S3KPC7 // A0A1S3MYK9 // A0A1S3RNL9 // A0A1S3MUA7 // A0A1S3MUA3 // B5DGL3 // C0PU89 // A0A1S3P376 // B9EMU9 // A0A1S3KJB2 // A0A1S3NW…
GO:0042180	BP	cellular ketone metabolic process	25	672	3.72024	771	65384	1.17919	3.15492	1e-06	3.7e-05	// B5X3A5 // B5XCP6 // B5X4B1 // C0H9P1 // B5XG51 // B5XFJ9 // C0H9C1 // B5DGS2 // B5X434 // C0H820 // Q7ZZK9 // Q7ZZK8 // Q3YBN1 // C0HA51 // B5X4E3 // B5X4R5 // B5X340 // Q7ZZL0 // B5XAM9 // C0HA17 // B5X1I0 // B5X4T8 // B5X1V6 // C0H935 // B5X2K3	// A0A1S3MSE8 // A0A1S3MSE9 // B5X4R5 // A0A1S3RIQ4 // A0A1S3M2M9 // A0A1S3RM23 // B5XB51 // A0A1S3RTX1 // A0A1S3Q5S7 // A0A1S3N0K4 // A0A1S3L087 // C0H9M4 // A0A1S3P7Z9 // A0A1S3PLM1 // A0A1S3KL22 // A0A1S3KL23 // A0A1S3N2K1 // A0A1S3ME44 // C0H9P1 // B5XGF7 // A0A1S3RIX0 // A0A1S3KPC7 // A0A1S3MYK9 // A0A1S3RNL9 // A0A1S3PEJ9 // A0A1S3MUA3 // B5DGL3 // C0PU89 // A0A1S3P376 // B9EMU9 // A0A1S3KJ…
GO:0055086	BP	nucleobase, nucleoside and nucleotide metabolic process	24	672	3.57143	612	65384	0.936009	3.81559	5.8e-08	3.1e-06	// B9EM17 // B5DGM5 // C0H9X1 // B5X215 // B5XCJ8 // B5XFJ9 // B5DGC6 // B5X2W8 // C0H9E7 // B5X434 // C0H904 // B5X3F7 // B5XD97 // B5XCD3 // C0H945 // B5XAD3 // B5XBW6 // B5DG78 // C0H9F4 // B5RI36 // B5X8U4 // B5X1I0 // B5XCA1 // B5X195	// A0A1S3MSE8 // A0A1S3NT29 // A0A1S3NUH3 // A0A1S3MP04 // A0A1S3NLU5 // A0A1S3NLU6 // A0A1S3Q5S5 // A0A1S3R6Y8 // A0A1S3PZF2 // B5X597 // A0A1S3PWI0 // A0A1S3N2K1 // B5X124 // A0A1S3PPW1 // A0A1S3RMI6 // A0A1S3KUT1 // A0A1S3SEE0 // A0A1S3SUT6 // A0A1S3KUT9 // M4VHK7 // A0A1S3LGZ3 // A0A1S3RN25 // A0A1S3PG84 // A0A1S3LJF5 // A0A1S3QMQ1 // C0H9F4 // B5X161 // A0A1S3RQE7 // Q2EMR4 // B5RIB1 // A0A1…
GO:0006457	BP	protein folding	22	672	3.27381	191	65384	0.29212	11.2071	1.8e-16	5e-14	// B5X3E4 // Q9W6K6 // B5DG64 // C0HBF1 // B5XDR0 // B9EMD3 // B9EMS3 // C0HAF8 // B9EPT4 // Q8UWF4 // Q0KFS6 // B5X4M2 // B5X1Z2 // B5XA06 // C0HA30 // C0PUU5 // U5KQM7 // C0HAB6 // B9EL76 // B5X2M8 // B5DG94 // B5RI17	// A0A1S3NS46 // A0A1S3PN43 // B5X9U4 // A0A1S3S062 // A0A1S3RRD2 // A0A1S3QPN8 // A0A1S3KWX9 // C0H9S8 // A0A1S3NA10 // A0A1S3MN98 // A0A1S3PTN7 // C0HBF1 // C0HBF0 // A0A1S3RBH6 // A0A1S3Q971 // B5XGN0 // A0A1S3L7N1 // A0A1S3SWX8 // A0A1S3NZP0 // A0A1S3Q7I9 // B9EPE9 // C0PU61 // B5XBF7 // B5X685 // B5X8F5 // B5X207 // A0A1S3T539 // A0A1S3S0C3 // C0HAB6 // A0A1S3MP94 // B5X5R4 // B5X2M8 // B5X7…
GO:0006753	BP	nucleoside phosphate metabolic process	22	672	3.27381	513	65384	0.784596	4.17261	4.3e-08	2.4e-06	// B9EM17 // B5DGM5 // C0H9X1 // B5X215 // B5XCJ8 // B5XFJ9 // B5DGC6 // B5X2W8 // C0H9E7 // B5X434 // C0H904 // B5XAD3 // B5XD97 // B5XCD3 // C0H945 // B5XBW6 // C0H9F4 // B5RI36 // B5X8U4 // B5DG78 // B5XCA1 // B5X195	// A0A1S3MSE8 // A0A1S3NT29 // A0A1S3NUH3 // A0A1S3NLU5 // A0A1S3NLU6 // A0A1S3Q5S5 // A0A1S3R6Y8 // A0A1S3PZF2 // B5X597 // A0A1S3N2K1 // B5X124 // A0A1S3PPW1 // A0A1S3RMI6 // A0A1S3KUT1 // A0A1S3SEE0 // A0A1S3SUT6 // M4VHK7 // A0A1S3LGZ3 // A0A1S3RN25 // A0A1S3LJF5 // A0A1S3QMQ1 // C0H9F4 // B5X161 // Q2EMR4 // B5RIB1 // B9EM17 // A0A1S3R2A6 // A0A1S3R5N6 // C0PU79 // A0A1S3P282 // A0A1S3MZF5 /…
GO:0009117	BP	nucleotide metabolic process	22	672	3.27381	513	65384	0.784596	4.17261	4.3e-08	2.4e-06	// B9EM17 // B5DGM5 // C0H9X1 // B5X215 // B5XCJ8 // B5XFJ9 // B5DGC6 // B5X2W8 // C0H9E7 // B5X434 // C0H904 // B5XAD3 // B5XD97 // B5XCD3 // C0H945 // B5XBW6 // C0H9F4 // B5RI36 // B5X8U4 // B5DG78 // B5XCA1 // B5X195	// A0A1S3MSE8 // A0A1S3NT29 // A0A1S3NUH3 // A0A1S3NLU5 // A0A1S3NLU6 // A0A1S3Q5S5 // A0A1S3R6Y8 // A0A1S3PZF2 // B5X597 // A0A1S3N2K1 // B5X124 // A0A1S3PPW1 // A0A1S3RMI6 // A0A1S3KUT1 // A0A1S3SEE0 // A0A1S3SUT6 // M4VHK7 // A0A1S3LGZ3 // A0A1S3RN25 // A0A1S3LJF5 // A0A1S3QMQ1 // C0H9F4 // B5X161 // Q2EMR4 // B5RIB1 // B9EM17 // A0A1S3R2A6 // A0A1S3R5N6 // C0PU79 // A0A1S3P282 // A0A1S3MZF5 /…
GO:0034621	BP	cellular macromolecular complex subunit organization	22	672	3.27381	881	65384	1.34742	2.42968	0.0002	0.0044	// C0HAZ6 // B5X0W4 // P84408 // B9EL07 // B5XFF0 // B5XCW2 // C0HA85 // B9EMD3 // C0H823 // B9ELD5 // B5XF07 // B5X8F3 // B9ELH2 // B5DGS1 // B5X7V8 // B5XA67 // B5XAA0 // B5X2M7 // C0PU35 // B5DGD5 // B5X3R3 // B5DG56	// A0A1S3M4J6 // A0A1S3P571 // A0A1S3NSS7 // A0A1S3Q9L8 // A0A1S3RNG4 // A0A1S3Q9L4 // B5X449 // A0A1S3L865 // A0A1S3Q9L0 // A0A1S3STB6 // A0A1S3SIT2 // A0A1S3PLW1 // C0HAZ6 // B5X9J4 // A0A1S3SU36 // A0A1S3LJH3 // B5XCW2 // B9EPU6 // B5XGF4 // B5XA52 // A0A1S3MQR3 // A0A1S3PQW4 // A0A1S3P197 // B5X7J0 // B5X8U5 // B5DGL1 // A0A1S3MLZ0 // A0A1S3RBG3 // A0A1S3QNW0 // B5X8F3 // A0A1S3QSA1 // A0A1S3…
GO:0006091	BP	generation of precursor metabolites and energy	21	672	3.125	486	65384	0.743301	4.20422	7.6e-08	3.9e-06	// B5X3P9 // B5X3K2 // B5RI36 // C0H9I1 // B5X8U4 // B5DG78 // B5DFX8 // B5X1B5 // B5X0R8 // C0H820 // B5X6P4 // B5XAD3 // B5X0U6 // B5XAM9 // G3DTP9 // I0J1J2 // B5X3H5 // I0J1J3 // B5DGS2 // B5X195 // B5XE29	// A0A1S3NAG1 // A0A1S3LFV3 // B5XB51 // A0A1S3LSB6 // A0A1S3MIZ7 // B5X9J7 // B5XE29 // B5X597 // A0A1S3PFE0 // A0A1S5RRP6 // A0A1S5RRP5 // B5X8U4 // A0A1S6XUV8 // M4VHK7 // B5DGL3 // A0A1S3LGZ3 // A0A1S3NHE7 // A0A1S3S970 // B5X3K2 // A0A1S3PV75 // A0A1S3MIQ1 // U5Y4W0 // B5X7T2 // C8Z1W0 // B5X0X6 // A0A0F6NW24 // A0A1S3R8S7 // A0A1S3SII5 // A0A1S3RQN1 // I6NYB8 // B5RI87 // B5XAD3 // B5XFL4 /…
GO:0030163	BP	protein catabolic process	21	672	3.125	660	65384	1.00942	3.09583	9.3e-06	0.00029	// C0HAC7 // C0H9L3 // C0H856 // B5X441 // B5X3V1 // B5X6N3 // C0HAC0 // C0HBT3 // B5X4M3 // B5XG11 // B5XGI9 // C0HAB9 // C0HA85 // Q9DE54 // B5XCL4 // C0H9T3 // B5DG53 // C0H8V2 // B5DGU4 // B5X4A4 // B5RI28	// A0A1S3SXI2 // B5XAL3 // A0A1S3P478 // B9EPU7 // A0A1S3MDV4 // B5X6M2 // A0A1S3RTX4 // A0A1S3KMG9 // A0A1S3M1W8 // B5XC96 // A0A1S3QX88 // A0A1S3NQV8 // A0A1S3L946 // B5XA59 // A0A1S3SF12 // A0A1S3RQS6 // B5XA50 // A0A1S3RDI1 // A0A1S3PDQ4 // A0A1S3MUA9 // B5XFW6 // A0A1S3QCH0 // A0A1S3PYN0 // A0A1S3KHZ2 // A0A1S3RE52 // A0A1S3LD63 // A0A1S3LER3 // A0A1S3KT49 // A0A1S3LD68 // A0A1S3PV72 // A0A1…
GO:0034622	BP	cellular macromolecular complex assembly	20	672	2.97619	759	65384	1.16083	2.56384	0.00019	0.0042	// B5X7V8 // B5XA67 // B5XAA0 // C0H823 // B5X3R3 // B9ELD5 // B5X2M7 // B5XF07 // B5XFF0 // C0PU35 // B5DGD5 // B5X8F3 // B5XCW2 // C0HA85 // B9EMD3 // B5DGS1 // C0HAZ6 // B5X0W4 // P84408 // B5DG56	// A0A1S3M4J6 // A0A1S3NSS7 // B9EPU6 // A0A1S3RNG4 // B9EPK8 // B5X449 // A0A1S3L865 // A0A1S3SIT2 // A0A1S3SIT4 // C0HAZ6 // B5X9J4 // A0A1S3SU36 // A0A1S3LJH3 // B5XGF4 // B5XA52 // A0A1S3PQW4 // A0A1S3P197 // B5X7J0 // B5X8U5 // A0A1S3MLZ0 // A0A1S3RBG3 // B5X8F3 // A0A1S3QSA1 // A0A1S3RJ33 // A0A1S3LHV3 // A0A1S3S0C3 // A0A1S3LER8 // A0A1S3M9M5 // B5X5R2 // B5XC29 // A0A1S3ST02 // B9EQ04 // …
GO:0042592	BP	homeostatic process	19	672	2.82738	576	65384	0.880949	3.20947	1.5e-05	0.00043	// D0QEL0 // A0A0G3B776 // B5X1H7 // B5X3B4 // C0HAC0 // B5X291 // B5X9Q1 // C0HBF4 // B5X3J5 // B5X8H5 // B5X348 // B5XAK2 // B5X9L4 // C0PU58 // B5X5Q6 // B5RIB0 // C0H8R1 // C0PU56 // B5X7X7	// B5X291 // B5X292 // A0A1S3RZE5 // A0A1S3M6S8 // A0A1S3LSB6 // A0A1S3MH64 // B5XE28 // A0A1S3PFE6 // A0A1S3PFE0 // A0A1S3KXH2 // A0A1S3KXH3 // A0A1S3SHX4 // A0A1S3R659 // A0A1S3QAD3 // A0A1S3Q9E3 // A0A1S3MF23 // A0A1S3MF21 // A0A1S3MNE5 // B5X847 // A0A1S3QBU6 // A0A1S3N1V0 // A0A1S3MS04 // A0A1S3PBL0 // A0A1S3QB03 // A0A1S3PZA1 // A0A1S3PZM8 // P49946 // P49947 // A0A1S3LB65 // B9EM15 // A0A1…
GO:0046483	BP	heterocycle metabolic process	19	672	2.82738	586	65384	0.896244	3.1547	1.8e-05	0.00051	// B5XCJ8 // B5XFJ9 // B5DGM5 // B5X3F7 // B5DGC6 // B5X8U4 // B5DG78 // B5XBW6 // C0H9X1 // B5X434 // B5RI36 // B5X2W8 // B5XAD3 // B5XCA1 // B5XD97 // B5XCD3 // B5X3E6 // B5X195 // C0H945	// A0A1S3QDX4 // A0A1S3NUH3 // P80081 // A0A1S3MB97 // A0A1S3NLU5 // A0A1S3NLU6 // C0H9V7 // B5X4F2 // A0A1S3R6Y8 // A0A1S3PZF2 // B5X597 // A0A1S3N2K1 // A0A1S3RMI6 // A0A1S3MB92 // A0A1S3SUT6 // M4VHK7 // A0A1S3LGZ3 // A0A1S3P376 // A0A1S3RN25 // A0A1S3LJF5 // A0A1S3LI09 // A0A1S3SGM1 // A0A1S3KJB2 // B5X161 // A0A1S3RR12 // Q2EMR4 // B5X5R6 // A0A1S3KTP9 // A0A1S3R2A6 // A0A1S3R5N6 // A0A1S3T3…
GO:0006508	BP	proteolysis	19	672	2.82738	699	65384	1.06907	2.64471	0.00018	0.0042	// B5XG11 // C0H9L3 // C0H856 // B5X441 // B5X3V1 // B5X6N3 // C0HAC0 // C0HBT3 // B5X4M3 // Q9DE54 // B5XGI9 // C0HAB9 // C0HA85 // B5XCL4 // B5XAB2 // C0H9T3 // B5DG53 // B5DGU4 // B5X4A4	// A0A1S3SXI2 // B5XAL3 // B5XAV2 // B9EPU7 // A0A1S3MDV4 // B5XB55 // A0A1S3RTX4 // A0A1S3KMG9 // A0A1S3M1W8 // B5XC96 // A0A1S3QX88 // A0A1S3NQV8 // A0A1S3L946 // B5XA59 // A0A1S3SH05 // A0A1S3SF12 // A0A1S3RQS6 // B5XA50 // A0A1S3RDI1 // A0A1S3PDQ4 // A0A1S3SH07 // A0A1S3MUA9 // B5XFW6 // A0A1S3QCH0 // A0A1S3PYN0 // B5XAQ8 // A0A1S3KHZ2 // A0A1S3RE52 // A0A1S3LD63 // A0A1S3LER3 // A0A1S3KT49 /…
GO:0034641	BP	cellular nitrogen compound metabolic process	19	672	2.82738	716	65384	1.09507	2.58192	0.00025	0.0054	// B5X3A5 // B5XCP6 // B5X434 // C0HA51 // B5X1I0 // B9EM17 // C0H9P1 // B5X4T8 // C0H9C1 // B5X3E6 // B5X1V6 // B5X2W8 // B5X4E3 // Q7ZZK9 // Q7ZZK8 // B5X340 // Q7ZZL0 // B5XFJ9 // C0H945	// A0A1S3MSE8 // A0A1S3MB92 // A0A1S3MB97 // A0A1S3PSZ6 // A0A1S3M2M9 // C0H9V7 // A0A1S3N0K4 // B5X4F2 // A0A1S3P7Z9 // A0A1S3NL90 // A0A1S3KL23 // A0A1S3N2K1 // A0A1S3ME44 // B5XGF7 // A0A1S3KUT1 // A0A1S3PV30 // A0A1S3KPC7 // A0A1S3MUA7 // A0A1S3RWX3 // C0PU89 // A0A1S3P376 // A0A1S3NJT5 // A0A1S3LI09 // A0A1S3SGM1 // A0A1S3KJB2 // A0A1S3QF15 // A0A1S3LER1 // A0A1S3RR12 // B5X205 // B5X5R6 // …
GO:0006066	BP	alcohol metabolic process	18	672	2.67857	520	65384	0.795302	3.36799	1.3e-05	0.00038	// B5X4B1 // B5X4B0 // B5X3K2 // Q3YBN1 // C0H9I1 // B9EM17 // C0H8G6 // B5DFX8 // B5X1B5 // C0HA42 // C0H868 // B5X0U6 // I0J1J2 // B5X3H5 // I0J1J3 // C0HAA0 // B5X0R8 // B5XE29	// A0A1S3NF93 // A0A1S3NAG1 // C0H9M4 // C0H7J1 // A0A1S3QF86 // A0A1S3R491 // B5XB51 // A0A1S3LSB6 // A0A1S3Q5S7 // B5XE29 // A0A1S3P878 // A0A1S3PFE0 // A0A1S3KL23 // A0A1S3MKZ8 // B5XGF1 // A0A1S3P877 // A0A1S3MTL0 // A0A1S3KPC9 // A0A1S3LVB7 // B5DGL3 // A0A1S3P2A9 // A0A1S3RAJ4 // A0A1S3P2A7 // A0A1S3MSE7 // B9EMU9 // A0A1S3KPQ8 // B5X712 // A0A1S3Q488 // A0A1S3REP7 // A0A1S3S977 // A0A1S3S9…
GO:0051603	BP	proteolysis involved in cellular protein catabolic process	18	672	2.67857	634	65384	0.969656	2.76239	0.00016	0.0037	// B5XG11 // C0H9L3 // C0H856 // B5X441 // B5X3V1 // B5X6N3 // C0HAC0 // C0HBT3 // B5X4M3 // Q9DE54 // B5XGI9 // C0HAB9 // C0HA85 // B5XCL4 // C0H9T3 // B5DG53 // B5DGU4 // B5X4A4	// A0A1S3SXI2 // B5XAL3 // A0A1S3P478 // B9EPU7 // A0A1S3MDV4 // A0A1S3RTX4 // A0A1S3KMG9 // A0A1S3M1W8 // B5XC96 // A0A1S3QX88 // A0A1S3NQV8 // A0A1S3L946 // B5XA59 // A0A1S3SF12 // A0A1S3RQS6 // B5XA50 // A0A1S3RDI1 // A0A1S3PDQ4 // A0A1S3MUA9 // B5XFW6 // A0A1S3QCH0 // A0A1S3PYN0 // A0A1S3KHZ2 // A0A1S3RE52 // A0A1S3LD63 // A0A1S3LER3 // A0A1S3KT49 // A0A1S3LD68 // A0A1S3PV72 // A0A1S3QZD1 // …
GO:0044257	BP	cellular protein catabolic process	18	672	2.67857	634	65384	0.969656	2.76239	0.00016	0.0037	// B5XG11 // C0H9L3 // C0H856 // B5X441 // B5X3V1 // B5X6N3 // C0HAC0 // C0HBT3 // B5X4M3 // Q9DE54 // B5XGI9 // C0HAB9 // C0HA85 // B5XCL4 // C0H9T3 // B5DG53 // B5DGU4 // B5X4A4	// A0A1S3SXI2 // B5XAL3 // A0A1S3P478 // B9EPU7 // A0A1S3MDV4 // A0A1S3RTX4 // A0A1S3KMG9 // A0A1S3M1W8 // B5XC96 // A0A1S3QX88 // A0A1S3NQV8 // A0A1S3L946 // B5XA59 // A0A1S3SF12 // A0A1S3RQS6 // B5XA50 // A0A1S3RDI1 // A0A1S3PDQ4 // A0A1S3MUA9 // B5XFW6 // A0A1S3QCH0 // A0A1S3PYN0 // A0A1S3KHZ2 // A0A1S3RE52 // A0A1S3LD63 // A0A1S3LER3 // A0A1S3KT49 // A0A1S3LD68 // A0A1S3PV72 // A0A1S3QZD1 // …
GO:0019725	BP	cellular homeostasis	17	672	2.52976	408	65384	0.624006	4.05407	2e-06	6.7e-05	// D0QEL0 // A0A0G3B776 // C0HBF4 // B5X291 // B5X9Q1 // B5X1H7 // B5X3J5 // B5X8H5 // B5X348 // B5XAK2 // B5X9L4 // C0PU58 // B5X5Q6 // B5RIB0 // C0H8R1 // C0PU56 // B5X7X7	// B5X291 // B5X292 // A0A1S3RZE5 // A0A1S3LSB6 // B5XE28 // A0A1S3PFE0 // A0A1S3P4P3 // A0A1S3N642 // A0A1S3R659 // A0A1S3QAD3 // A0A1S3Q9E3 // A0A1S3MF23 // A0A1S3MF21 // A0A1S3MNE5 // B5X847 // A0A1S3QBU6 // A0A1S3MS04 // A0A1S3PBL0 // A0A1S3QB03 // A0A1S3PZM8 // P49946 // P49947 // A0A1S3LB65 // B9EM15 // A0A1S3Q375 // A0A1S3L0Y0 // B5X4Y3 // B5XF30 // B5X9S5 // A0A1S3R9B0 // B5X6K7 // A0A1S3…
GO:0006519	BP	cellular amino acid and derivative metabolic process	17	672	2.52976	521	65384	0.796831	3.17478	4.5e-05	0.0012	// B5X3A5 // B5XCP6 // B5X434 // C0HA51 // B5X248 // B5X252 // B5X1I0 // C0H9P1 // B5X4T8 // C0H9C1 // B5XFJ9 // B5X1V6 // B5X4E3 // Q7ZZK9 // Q7ZZK8 // B5X340 // Q7ZZL0	// A0A1S3MSE8 // A0A1S3NM74 // A0A1S3M2M9 // B5X1C6 // A0A1S3N0K4 // A0A1S3NUU7 // A0A1S3P7Z9 // A0A1S3KL23 // A0A1S3L8R0 // A0A1S3N2K1 // A0A1S3ME44 // B5XGF7 // A0A1S3SYI0 // A0A1S3MUA7 // A0A1S3RWX3 // C0PU89 // A0A1S3P376 // A0A1S3KJB2 // A0A1S3QF15 // A0A1S3LER1 // A0A1S3RR12 // B5X205 // B5X2T1 // A0A1S3KRL1 // C0HBA2 // A0A1S3QTW1 // A0A1S3MQY3 // A0A1S3L4C4 // A0A1S3L4C0 // A0A1S3KY97 // …
GO:0019318	BP	hexose metabolic process	16	672	2.38095	299	65384	0.457298	5.20656	1.5e-07	7.1e-06	// B5X4B1 // B5X4B0 // B5X3K2 // Q3YBN1 // C0H9I1 // B9EM17 // C0H8G6 // B5DFX8 // B5X1B5 // B5X0U6 // I0J1J2 // B5X3H5 // I0J1J3 // C0HAA0 // B5X0R8 // B5XE29	// A0A1S3NAG1 // B9EPN0 // A0A1S3MI30 // A0A1S3MZQ2 // B5X5Z9 // A0A1S3KU63 // A0A1S3NV54 // A0A1S3MFP2 // A0A1S3S1F2 // B5DGT9 // A0A1S3P206 // A0A1S3LSB6 // A0A1S3Q5S7 // C0H981 // B5RIA1 // C0HAA0 // B5XE29 // A0A1S3Q6S9 // B9EM22 // A0A1S3MYS2 // A0A1S3NBU4 // A0A1S3MKZ8 // B5XGF1 // A0A1S3NCF5 // B5X6U5 // A0A1S3NCF0 // A0A1S3PKB5 // A0A1S3L341 // A0A1S3PW39 // A0A1S3LCS4 // A0A1S3KPC9 // A0…
GO:0005996	BP	monosaccharide metabolic process	16	672	2.38095	329	65384	0.503181	4.7318	5.3e-07	2.1e-05	// B5X4B1 // B5X4B0 // B5X3K2 // Q3YBN1 // C0H9I1 // B9EM17 // C0H8G6 // B5DFX8 // B5X1B5 // B5X0U6 // I0J1J2 // B5X3H5 // I0J1J3 // C0HAA0 // B5X0R8 // B5XE29	// A0A1S3NAG1 // B9EPN0 // A0A1S3MI30 // C0H7J1 // A0A1S3MZQ2 // B5X5Z9 // A0A1S3KU63 // A0A1S3NV54 // A0A1S3MFP2 // A0A1S3S1F2 // B5DGT9 // A0A1S3P206 // A0A1S3LSB6 // A0A1S3Q5S7 // C0H981 // B5X8G8 // C0HAA0 // B5XE29 // A0A1S3Q6S9 // B9EM22 // A0A1S3MYS2 // A0A1S3NBU4 // A0A1S3MKZ8 // B5XGF1 // A0A1S3NCF5 // B5X6U5 // A0A1S3NCF0 // B5X1S9 // A0A1S3PKB5 // A0A1S3SM83 // A0A1S3L341 // A0A1S3PW39…
GO:0042221	BP	response to chemical stimulus	16	672	2.38095	516	65384	0.789184	3.01698	0.00013	0.0034	// B5X397 // C0HBD9 // B5X3V1 // B5X7T6 // B5X4P0 // B9EMQ6 // B9ELD5 // B5XFJ9 // B5X348 // C0HA85 // Q9W6K6 // Q5J7P6 // C6KE15 // C0HAX5 // B5DGU4 // C0H8U1	// A0A1S3QDX6 // A0A1S3Q574 // A0A1S3QIT0 // B5XC95 // Q709D2 // A0A1S3N647 // A0A1S3L229 // A0A1S3SZN5 // A0A1S3QXV8 // A0A1S3N2K1 // A0A1S3QGI5 // A0A1S3NDR3 // A0A1S3NKG6 // A0A1S3P056 // A0A1S3QCH2 // A0A1S3MSB1 // A0A1S3QXP4 // A0A1S3RBG3 // A0A1S3RXH6 // C0PU84 // A0A1S3Q1B6 // A0A1S3QTX6 // A0A1S3SWV1 // A0A1S3LER3 // Q2EMR5 // B5X7T6 // A0A1S3QWL8 // B5X3X6 // A0A1S3SDG3 // A0A1S3T5G1 // …
GO:0009308	BP	amine metabolic process	16	672	2.38095	532	65384	0.813655	2.92624	0.00019	0.0042	// B5X3A5 // B5XCP6 // B5X434 // C0HA51 // B5X1I0 // C0H9P1 // B5X4T8 // C0H9C1 // B5XFJ9 // B5X1V6 // B5X4E3 // Q7ZZK9 // Q7ZZK8 // B5X340 // Q7ZZL0 // B5XFA3	// A0A1S3MSE8 // A0A1S3M2M9 // B5X1C6 // A0A1S3QKV6 // A0A1S3N0K4 // A0A1S3NUU7 // A0A1S3P7Z9 // A0A1S3KL23 // A0A1S3LED4 // A0A1S3N2K1 // A0A1S3ME44 // B5XGF7 // A0A1S3KPC7 // A0A1S3MUA7 // A0A1S3RWX3 // A0A1S3RB55 // A0A1S3P376 // A0A1S3KJB2 // A0A1S3QF15 // A0A1S3LER1 // A0A1S3RR12 // B5X205 // B5X2T1 // A0A1S3KRL1 // C0HBA2 // A0A1S3MQY3 // A0A1S3L4C4 // A0A1S3L4C0 // A0A1S3KY97 // A0A1S3KK23…
GO:0009259	BP	ribonucleotide metabolic process	15	672	2.23214	225	65384	0.344121	6.48651	2.1e-08	1.2e-06	// B5XCJ8 // B5DGM5 // B5DGC6 // B5X8U4 // B5DG78 // C0H9X1 // B5X434 // B5RI36 // B5X2W8 // B5XAD3 // B5XCA1 // B5XD97 // B5XCD3 // B5X195 // C0H945	// A0A1S3S795 // A0A1S3PSZ6 // A0A1S3T6P8 // A0A1S3P9I9 // A0A1S2X0C2 // A0A1S3LI38 // B5XGG0 // B5X161 // B5XBZ7 // B5XDF0 // A0A1S3R5N6 // A0A1S3MM17 // B5X5B0 // B5RIB1 // A0A1S3KJA5 // A0A1S3R6Y8 // A0A1S3PZF2 // B5X597 // A0A1S3MJE5 // A0A1S3P9N1 // B5X4W4 // P68529 // B5DGC9 // A0A1S3MG06 // B5DGC6 // A0A1S3KPP8 // A0A1S3L1F9 // C0H715 // A0A1S3MIB4 // B5XD97 // B5X626 // A0A1S3SUT6 // M4VH…
GO:0009165	BP	nucleotide biosynthetic process	15	672	2.23214	387	65384	0.591888	3.77123	1.8e-05	0.0005	// B5XCJ8 // B5XFJ9 // B5DGM5 // B5DGC6 // B5DG78 // B5X434 // B5RI36 // B5X2W8 // B5XAD3 // B5XCA1 // B5X8U4 // B5XCD3 // C0H945 // B5X195 // B5X215	// A0A1S3MSE8 // A0A1S3NUH3 // A0A1S3NLU5 // A0A1S3NLU6 // A0A1S3R6Y8 // A0A1S3PZF2 // B5X597 // A0A1S3N2K1 // A0A1S3RMI6 // A0A1S3KUT1 // A0A1S3SUT6 // M4VHK7 // A0A1S3LGZ3 // A0A1S3RN25 // A0A1S3LJF5 // A0A1S3QMQ1 // Q2EMR4 // A0A1S3R2A6 // A0A1S3R5N6 // C0PU79 // A0A1S3MZF5 // A0A1S3R018 // B5DH26 // A0A1S3KIA7 // A0A1S3MCT3 // A0A1S3NZZ1 // A0A1S3M770 // A0A1S3SNP1 // A0A1S3RQN1 // A0A1S3SNP8…
GO:0006520	BP	cellular amino acid metabolic process	15	672	2.23214	393	65384	0.601064	3.71365	2.1e-05	0.00058	// B5X3A5 // B5XCP6 // B5X434 // C0HA51 // B5X1I0 // C0H9P1 // B5X4T8 // C0H9C1 // B5XFJ9 // B5X1V6 // B5X4E3 // Q7ZZK9 // Q7ZZK8 // B5X340 // Q7ZZL0	// A0A1S3MSE8 // A0A1S3M2M9 // A0A1S3N0K4 // A0A1S3P7Z9 // A0A1S3KL23 // A0A1S3N2K1 // A0A1S3ME44 // B5XGF7 // A0A1S3KPC7 // A0A1S3MUA7 // C0PU89 // A0A1S3P376 // A0A1S3KJB2 // A0A1S3QF15 // A0A1S3LER1 // A0A1S3RR12 // B5X205 // A0A1S3KRL1 // C0HBA2 // A0A1S3MQY3 // A0A1S3L4C4 // A0A1S3L4C0 // A0A1S3KK23 // A0A1S3PLH0 // A0A1S3NIY9 // A0A1S3KIN9 // A0A1S3PG83 // C0HB36 // A0A1S3RQN3 // A0A1S3L8G8…
GO:0044106	BP	cellular amine metabolic process	15	672	2.23214	447	65384	0.683653	3.26502	9e-05	0.0023	// B5X3A5 // B5XCP6 // B5X434 // C0HA51 // B5X1I0 // C0H9P1 // B5X4T8 // C0H9C1 // B5XFJ9 // B5X1V6 // B5X4E3 // Q7ZZK9 // Q7ZZK8 // B5X340 // Q7ZZL0	// A0A1S3MSE8 // A0A1S3M2M9 // A0A1S3N0K4 // A0A1S3NUU7 // A0A1S3P7Z9 // A0A1S3KL23 // A0A1S3N2K1 // A0A1S3ME44 // B5XGF7 // A0A1S3KPC7 // A0A1S3MUA7 // A0A1S3RWX3 // C0PU89 // A0A1S3P376 // A0A1S3KJB2 // A0A1S3QF15 // A0A1S3LER1 // A0A1S3RR12 // B5X205 // B5X2T1 // A0A1S3KRL1 // C0HBA2 // A0A1S3MQY3 // A0A1S3L4C4 // A0A1S3L4C0 // A0A1S3KY97 // A0A1S3KK23 // A0A1S3PLH0 // A0A1S3NIY9 // A0A1S3KIN9…
GO:0045454	BP	cell redox homeostasis	14	672	2.08333	155	65384	0.237061	8.78817	1.2e-09	1.3e-07	// D0QEL0 // A0A0G3B776 // C0HBF4 // B5X291 // B5X9Q1 // B5X1H7 // B5X3J5 // B5X8H5 // B5XAK2 // B5X9L4 // C0PU58 // B5X5Q6 // B5RIB0 // B5X7X7	// B5XBV8 // B9ENN0 // C0PUP1 // B5X6M7 // B5X291 // A0A1S3RZE5 // B5X3C0 // A0A1S3PP45 // B5RIA7 // A0A1S3PX04 // B5XE28 // A0A1S3NZC9 // A0A1S3PAZ6 // A0A1S3QLV6 // A0A1S3LV10 // B5XAN1 // A0A1S3PZN5 // B5XFN6 // A0A1S3MF21 // A0A1S3QAU1 // B5XFD8 // A0A0G3BAW3 // B9EP13 // B5XFI4 // A0A0G3B776 // A0A1S3MEY7 // B9EPV5 // A0A1S3QQT5 // A0A1S3PBL0 // B5RIB0 // A0A1S3RT57 // B9ELH6 // B5XDK7 // A0…
GO:0044282	BP	small molecule catabolic process	14	672	2.08333	267	65384	0.408357	5.10175	1.1e-06	3.8e-05	// B5X4B0 // B5X3K2 // C0H9I1 // B9EM17 // B5DFX8 // B5X1B5 // B5XFJ9 // B5X0U6 // C0H935 // B5X3H5 // I0J1J3 // I0J1J2 // B5X0R8 // B5XE29	// A0A1S3LDS5 // B5X3N8 // A0A1S3N0A3 // B9EPN0 // C0H9M4 // A0A1S3LI37 // A0A1S3NNV0 // A0A1S3SST8 // A0A1S3SN28 // A0A1S3MSE8 // A0A1S3M2M9 // A0A1S3S1F2 // A0A1S3M2R8 // B5DGT9 // B5XB51 // A0A1S3LSB6 // B5DGU0 // A0A1S3M3S2 // A0A1S3N0K4 // I0J1J3 // B5XE29 // B5X6U8 // A0A1S3QB34 // B5X919 // B9EM22 // C0HB12 // A0A1S3L8R0 // A0A1S3PGR8 // B5XGF1 // C0HAI9 // A0A1S3QEL3 // A0A1S3MDL2 // M4V2…
GO:0043632	BP	modification-dependent macromolecule catabolic process	14	672	2.08333	557	65384	0.85189	2.44554	0.0024	0.042	// B5X441 // B5X3V1 // B5X6N3 // C0HAC0 // C0HBT3 // B5X4M3 // B5XGI9 // C0HAB9 // C0HA85 // B5XCL4 // C0H9T3 // B5DG53 // B5DGU4 // B5X4A4	// A0A1S3SXI2 // B5XAL3 // A0A1S3P478 // B9EPU7 // A0A1S3MDV4 // A0A1S3RTX4 // A0A1S3KMG9 // A0A1S3M1W8 // B5XC96 // A0A1S3QX88 // A0A1S3NQV8 // A0A1S3L946 // B5XA59 // A0A1S3SF12 // A0A1S3RQS6 // B5XA50 // A0A1S3RDI1 // A0A1S3MUA9 // A0A1S3QCH0 // A0A1S3RE52 // A0A1S3LD63 // A0A1S3LER3 // A0A1S3LD68 // A0A1S3PV72 // A0A1S3QZD1 // A0A1S3NUQ9 // B9EM13 // A0A1S3RY51 // A0A1S3P4K8 // A0A1S3KU83 // …
GO:0019941	BP	modification-dependent protein catabolic process	14	672	2.08333	557	65384	0.85189	2.44554	0.0024	0.042	// B5X441 // B5X3V1 // B5X6N3 // C0HAC0 // C0HBT3 // B5X4M3 // B5XGI9 // C0HAB9 // C0HA85 // B5XCL4 // C0H9T3 // B5DG53 // B5DGU4 // B5X4A4	// A0A1S3SXI2 // B5XAL3 // A0A1S3P478 // B9EPU7 // A0A1S3MDV4 // A0A1S3RTX4 // A0A1S3KMG9 // A0A1S3M1W8 // B5XC96 // A0A1S3QX88 // A0A1S3NQV8 // A0A1S3L946 // B5XA59 // A0A1S3SF12 // A0A1S3RQS6 // B5XA50 // A0A1S3RDI1 // A0A1S3MUA9 // A0A1S3QCH0 // A0A1S3RE52 // A0A1S3LD63 // A0A1S3LER3 // A0A1S3LD68 // A0A1S3PV72 // A0A1S3QZD1 // A0A1S3NUQ9 // B9EM13 // A0A1S3RY51 // A0A1S3P4K8 // A0A1S3KU83 // …
GO:0009199	BP	ribonucleoside triphosphate metabolic process	13	672	1.93452	134	65384	0.204943	9.43932	2e-09	1.8e-07	// B5XCJ8 // B5DGM5 // B5DGC6 // B5X8U4 // B5DG78 // C0H9X1 // B5X434 // B5RI36 // B5XAD3 // B5XCA1 // B5XD97 // B5XCD3 // B5X195	// A0A1S3S795 // A0A1S3PAS6 // A0A1S3LI38 // B5XGG0 // B5X161 // B5XDF0 // A0A1S3R5N6 // B5X5B0 // B5RIB1 // A0A1S3KJA5 // A0A1S3PZF2 // B5X597 // B5X4W4 // A0A1S3P9I9 // B5DGC9 // A0A1S3MG06 // B5DGC6 // A0A1S3L1F9 // C0H715 // B5XD97 // B5X626 // A0A1S3SUT6 // M4VHK7 // W0LQS8 // B5XAW0 // B5X6L8 // E2JDJ1 // B5XE35 // A0A1S3P0X0 // A0A1S3SBG2 // A0A1S3LTE0 // A0A1S3SBG4 // A0A1S3R5J6 // B5XEN1…
GO:0009141	BP	nucleoside triphosphate metabolic process	13	672	1.93452	141	65384	0.215649	8.9707	3.7e-09	3e-07	// B5XCJ8 // B5DGM5 // B5DGC6 // B5X8U4 // B5DG78 // C0H9X1 // B5X434 // B5RI36 // B5XAD3 // B5XCA1 // B5XD97 // B5XCD3 // B5X195	// A0A1S3S795 // B5DGK5 // A0A1S3PAS6 // A0A1S3LI38 // B5XGG0 // B5X161 // B5XDF0 // A0A1S3R5N6 // B5X5B0 // B5RIB1 // A0A1S3KJA5 // A0A1S3PZF2 // B5X597 // B5X4W4 // A0A1S3P9I9 // B5DGC9 // A0A1S3MG06 // B5DGC6 // A0A1S3L1F9 // C0H715 // B5XD97 // B5X626 // A0A1S3SUT6 // M4VHK7 // W0LQS8 // B5XAW0 // B5X6L8 // E2JDJ1 // B5XE35 // A0A1S3P0X0 // A0A1S3SBG2 // A0A1S3LTE0 // A0A1S3SBG4 // A0A1S3R5J6…
GO:0016052	BP	carbohydrate catabolic process	13	672	1.93452	160	65384	0.244708	7.90543	1.7e-08	1.1e-06	// B5X4B0 // B5X3K2 // B5XE29 // C0H9I1 // B9EM17 // B5DFX8 // B5X1B5 // B5X0U6 // I0J1J2 // B5X3H5 // I0J1J3 // B5X0R8 // B5XFA3	// B9EPN0 // C0H9M4 // A0A1S3LI37 // A0A1S3QJL1 // B5XET9 // A0A1S3S1F2 // B5DGT9 // B5XCN8 // B5XB51 // A0A1S3LSB6 // B5XE29 // A0A1S3Q6S9 // B9EM22 // A0A1S3PFE0 // A0A1S3PGK8 // B5XGF1 // B5XAN4 // A0A1S3RUT8 // A0A1S3L341 // B5XFA3 // A0A1S3PU66 // A0A1S3RB55 // A0A1S3Q086 // Q91461 // B5X5Z9 // B5DGU0 // O73866 // B5X3H5 // B5X3K2 // A0A1S3PV75 // A0A1S3NPG7 // A0A1S3MIQ1 // B9EM17 // B5XDN9…
GO:0006006	BP	glucose metabolic process	13	672	1.93452	184	65384	0.281414	6.87429	8.9e-08	4.5e-06	// B5X4B1 // I0J1J3 // B5X3K2 // Q3YBN1 // B9EM17 // B5DFX8 // B5X1B5 // B5X0U6 // I0J1J2 // B5X3H5 // C0H9I1 // B5X0R8 // B5XE29	// A0A1S3NAG1 // B9EPN0 // A0A1S3RMY0 // A0A1S3NV54 // A0A1S3S1F2 // B5DGT9 // B5XB51 // A0A1S3LSB6 // A0A1S3Q5S7 // B5XE29 // A0A1S3Q6S9 // B9EM22 // A0A1S3MYS2 // A0A1S3QJT3 // B5XGF1 // B5X6U5 // A0A1S3PKB5 // A0A1S3L341 // A0A1S3MTL0 // A0A1S3KQE9 // B5DGL3 // A0A1S3Q086 // A0A1S3NA20 // B9EMU9 // A0A1S3LK49 // A0A1S3LGI4 // B5X5Z9 // B5DGU0 // A0A1S3Q5R6 // B5X3K2 // O73866 // A0A1S3R315 // …
GO:0009150	BP	purine ribonucleotide metabolic process	13	672	1.93452	188	65384	0.287532	6.72803	1.1e-07	5.6e-06	// B5XCJ8 // B5DGM5 // B5DGC6 // B5X8U4 // B5DG78 // C0H9X1 // B5RI36 // B5XAD3 // B5XCA1 // B5XD97 // B5XCD3 // B5X195 // C0H945	// A0A1S3MIB4 // A0A1S3PSZ6 // A0A1S3T6P8 // A0A1S3P9I9 // A0A1S2X0C2 // B5XGG0 // B5X161 // B5XBZ7 // B5XDF0 // A0A1S3R5N6 // A0A1S3MM17 // B5X5B0 // B5RIB1 // A0A1S3R6Y8 // A0A1S3PZF2 // B5X597 // A0A1S3MJE5 // P68529 // B5DGC9 // B5DGC6 // A0A1S3KPP8 // A0A1S3L1F9 // C0H715 // B5XD97 // B5X626 // A0A1S3SUT6 // M4VHK7 // A0A1S3LIL6 // W0LQS8 // A0A1S3MM09 // B5XAW0 // B5X6L8 // C0H8Y0 // A0A1S3…
GO:0009260	BP	ribonucleotide biosynthetic process	13	672	1.93452	214	65384	0.327297	5.9106	5.1e-07	2.1e-05	// B5XCJ8 // B5DGM5 // B5DGC6 // B5DG78 // B5X434 // B5RI36 // B5X2W8 // B5XAD3 // B5XCA1 // B5X8U4 // B5XCD3 // B5X195 // C0H945	// A0A1S3S795 // A0A1S3PSZ6 // A0A1S3T6P8 // A0A1S3P9I9 // A0A1S2X0C2 // A0A1S3LI38 // B5XGG0 // B5XBZ7 // B5XDF0 // A0A1S3R5N6 // A0A1S3MM17 // B5X5B0 // B5RIB1 // A0A1S3KJA5 // A0A1S3R6Y8 // A0A1S3PZF2 // B5X597 // A0A1S3MJE5 // A0A1S3P9N1 // B5X4W4 // P68529 // B5DGC9 // A0A1S3MG06 // B5DGC6 // A0A1S3KPP8 // C0H715 // A0A1S3MIB4 // B5X626 // A0A1S3SUT6 // M4VHK7 // A0A1S3LIL6 // W0LQS8 // A0A1…
GO:0006163	BP	purine nucleotide metabolic process	13	672	1.93452	288	65384	0.440475	4.39191	1.3e-05	0.00038	// B5XCJ8 // B5DGM5 // B5DGC6 // B5X8U4 // B5DG78 // C0H9X1 // B5RI36 // B5XAD3 // B5XCA1 // B5XD97 // B5XCD3 // B5X195 // C0H945	// A0A1S3SRU1 // A0A1S3SRU0 // A0A1S3PSZ6 // A0A1S3T6P8 // A0A1S3P9I9 // A0A1S2X0C2 // A0A1S3SDV2 // A0A1S3NUH3 // C0H976 // B5X161 // A0A1S3NLU5 // A0A1S3NLU6 // B5XDF0 // A0A1S3PJU2 // A0A1S3MM17 // A0A1S3SEE0 // B5X5B0 // B5RIB1 // B5XBZ7 // A0A1S3Q7D0 // A0A1S3R6Y8 // A0A1S3PZF2 // B5X597 // A0A1S3S940 // A0A1S3MJE5 // A0A1S3PV85 // P68529 // B5DGC9 // B5DGC6 // A0A1S3Q0L4 // A0A1S3KPP8 // C0…
GO:0007015	BP	actin filament organization	13	672	1.93452	457	65384	0.698948	2.76777	0.0012	0.021	// B9EMH3 // B9EP59 // C0H9H2 // B5X2M7 // C0PU35 // B5DGD5 // B5XCW2 // B5X3R3 // C0H9I5 // B5XAM0 // B9ELH2 // C0H8V5 // B5DG56	// A0A1S3QMM5 // A0A1S3P571 // A0A1S3Q9L8 // A0A1S3Q9L4 // A0A1S3Q9L0 // A0A1S3MGC3 // A0A1S3RKM1 // A0A1S3KL27 // B5XCW2 // B5XG16 // A0A1S3MQR3 // A0A1S3RG30 // B5X7J0 // B5X7J3 // B5DGL1 // A0A1S3RBG3 // A0A1S3QNW0 // A0A1S3RJ34 // A0A1S3QSA1 // A0A1S3RJ33 // A0A1S3KPH3 // A0A1S3NHE9 // B9EM18 // B5XC25 // A0A1S3SLW7 // A0A1S3NJG0 // B9EM12 // A0A1S3KXA3 // B5XCV7 // A0A1S3MNK0 // A0A1S3KP47 /…
GO:0019320	BP	hexose catabolic process	12	672	1.78571	105	65384	0.16059	11.1197	1.2e-09	1.3e-07	// B5X4B0 // B5X3K2 // C0H9I1 // B9EM17 // B5DFX8 // B5X1B5 // B5X0U6 // I0J1J2 // B5X3H5 // I0J1J3 // B5X0R8 // B5XE29	// B9EPN0 // C0H9M4 // A0A1S3S1F2 // B5DGT9 // B5XB51 // A0A1S3LSB6 // B5XE29 // A0A1S3Q6S9 // B9EM22 // A0A1S3PFE0 // A0A1S3PGK8 // B5XGF1 // A0A1S3L341 // B5DGL3 // A0A1S3Q086 // B5X5Z9 // B5DGU0 // O73866 // B5X3H5 // B5X3K2 // A0A1S3PV75 // A0A1S3MIQ1 // B9EM17 // B5XDN9 // A0A1S3PYV6 // B5X1B5 // A0A1S3P282 // A0A1S3Q707 // B5DGM7 // A0A1S3KRF0 // A0A1S3SS19 // A0A1S3LBJ0 // B5XB10 // A0A1S3…
GO:0046365	BP	monosaccharide catabolic process	12	672	1.78571	108	65384	0.165178	10.8108	1.7e-09	1.7e-07	// B5X4B0 // B5X3K2 // C0H9I1 // B9EM17 // B5DFX8 // B5X1B5 // B5X0U6 // I0J1J2 // B5X3H5 // I0J1J3 // B5X0R8 // B5XE29	// B9EPN0 // C0H9M4 // A0A1S3S1F2 // B5DGT9 // B5XB51 // A0A1S3LSB6 // B5XE29 // A0A1S3Q6S9 // B9EM22 // A0A1S3PFE0 // A0A1S3PGK8 // B5XGF1 // A0A1S3L341 // B5DGL3 // A0A1S3Q086 // B5X5Z9 // B5DGU0 // O73866 // B5X3H5 // B5X3K2 // A0A1S3PV75 // A0A1S3MIQ1 // B9EM17 // B5XDN9 // A0A1S3PYV6 // B5X1B5 // A0A1S3P282 // A0A1S3Q707 // B5DGM7 // A0A1S3KRF0 // A0A1S3SS19 // A0A1S3LBJ0 // B5XB10 // A0A1S3…
GO:0009205	BP	purine ribonucleoside triphosphate metabolic process	12	672	1.78571	116	65384	0.177413	10.0653	3.9e-09	3e-07	// B5XCJ8 // B5DGM5 // B5DGC6 // B5X8U4 // B5DG78 // C0H9X1 // B5RI36 // B5XAD3 // B5XCA1 // B5XD97 // B5XCD3 // B5X195	// B5XGG0 // B5X161 // B5XDF0 // A0A1S3R5N6 // B5X5B0 // B5RIB1 // A0A1S3PZF2 // B5X597 // A0A1S3P9I9 // B5DGC9 // B5DGC6 // A0A1S3L1F9 // C0H715 // B5XD97 // B5X626 // A0A1S3SUT6 // M4VHK7 // W0LQS8 // B5XAW0 // B5X6L8 // E2JDJ1 // B5XE35 // A0A1S3P0X0 // A0A1S3SBG2 // A0A1S3LTE0 // A0A1S3SBG4 // A0A1S3R5J6 // B5XEN1 // Q9YGC0 // A0A1S3NYI0 // B5DH26 // B5X195 // A0A1S3KYH8 // B5DGM5 // B5DGM6 /…
GO:0009144	BP	purine nucleoside triphosphate metabolic process	12	672	1.78571	116	65384	0.177413	10.0653	3.9e-09	3e-07	// B5XCJ8 // B5DGM5 // B5DGC6 // B5X8U4 // B5DG78 // C0H9X1 // B5RI36 // B5XAD3 // B5XCA1 // B5XD97 // B5XCD3 // B5X195	// B5XGG0 // B5X161 // B5XDF0 // A0A1S3R5N6 // B5X5B0 // B5RIB1 // A0A1S3PZF2 // B5X597 // A0A1S3P9I9 // B5DGC9 // B5DGC6 // A0A1S3L1F9 // C0H715 // B5XD97 // B5X626 // A0A1S3SUT6 // M4VHK7 // W0LQS8 // B5XAW0 // B5X6L8 // E2JDJ1 // B5XE35 // A0A1S3P0X0 // A0A1S3SBG2 // A0A1S3LTE0 // A0A1S3SBG4 // A0A1S3R5J6 // B5XEN1 // Q9YGC0 // A0A1S3NYI0 // B5DH26 // B5X195 // A0A1S3KYH8 // B5DGM5 // B5DGM6 /…
GO:0046164	BP	alcohol catabolic process	12	672	1.78571	120	65384	0.183531	9.72976	5.8e-09	4.2e-07	// B5X4B0 // B5X3K2 // C0H9I1 // B9EM17 // B5DFX8 // B5X1B5 // B5X0U6 // I0J1J2 // B5X3H5 // I0J1J3 // B5X0R8 // B5XE29	// B9EPN0 // C0H9M4 // A0A1S3LI37 // A0A1S3S1F2 // B5DGT9 // B5XB51 // A0A1S3LSB6 // B5XE29 // A0A1S3Q6S9 // B9EM22 // A0A1S3PFE0 // A0A1S3PGK8 // B5XGF1 // A0A1S3L341 // B5DGL3 // A0A1S3Q086 // B5X5Z9 // B5DGU0 // O73866 // B5X3H5 // B5X3K2 // A0A1S3PV75 // A0A1S3MIQ1 // B9EM17 // B5XDN9 // A0A1S3PYV6 // B5X1B5 // A0A1S3P282 // A0A1S3Q707 // A0A1S3MD74 // B5DGM7 // A0A1S3KRF0 // A0A1S3SS19 // A0…
GO:0044275	BP	cellular carbohydrate catabolic process	12	672	1.78571	131	65384	0.200355	8.91276	1.6e-08	1e-06	// B5X4B0 // B5X3K2 // C0H9I1 // B9EM17 // B5DFX8 // B5X1B5 // B5X0U6 // I0J1J2 // B5X3H5 // I0J1J3 // B5X0R8 // B5XE29	// B9EPN0 // C0H9M4 // A0A1S3LI37 // A0A1S3S1F2 // B5DGT9 // B5XB51 // A0A1S3LSB6 // B5XE29 // A0A1S3Q6S9 // B9EM22 // A0A1S3PFE0 // A0A1S3PGK8 // B5XGF1 // A0A1S3L341 // B5DGL3 // A0A1S3Q086 // Q91461 // B5X5Z9 // B5DGU0 // O73866 // B5X3H5 // B5X3K2 // A0A1S3PV75 // A0A1S3MIQ1 // B9EM17 // B5XDN9 // A0A1S3PYV6 // B5X1B5 // A0A1S3P282 // A0A1S3Q707 // A0A1S3MD74 // B5DGM7 // A0A1S3LS71 // A0A1S3…
GO:0006952	BP	defense response	12	672	1.78571	372	65384	0.568947	3.13863	0.00061	0.012	// C0HBD9 // S0F1A6 // B5X397 // B9ELD5 // B5X405 // B5X2V9 // Q1A3D7 // F5B7Y3 // F5B7Y2 // B5DGU4 // P84408 // B5XFA3	// A0A1S3T2H8 // B5XE24 // B5XE28 // A0A1S3KL22 // A0A1S3MM99 // A0A1S3R8T4 // B5X9E3 // A0A1S3QIM4 // B5X7J9 // B5X3D9 // A0A1S3R7G5 // A0A1S3L4Q7 // B9EQI8 // A0A1S3NF02 // A0A1S3SEA0 // A0A1S3SFG7 // A0A1S3SFG5 // B5X3K9 // A0A1S3R8S9 // S0F0N4 // A0A1S3SMV5 // B5X8A6 // A0A1S3QXA5 // A0A1S3QXA8 // A0A1S3SBW5 // A0A1S3MLL4 // A0A1S3QJ73 // A0A1S3KSE7 // C0HBS7 // A0A1S3R3U2 // A0A1S3QY33 // A0…
GO:0006007	BP	glucose catabolic process	11	672	1.6369	104	65384	0.15906	10.2911	1.4e-08	9.1e-07	// I0J1J3 // B5X3K2 // B9EM17 // B5DFX8 // B5X1B5 // B5X0U6 // I0J1J2 // B5X3H5 // C0H9I1 // B5X0R8 // B5XE29	// B9EPN0 // C0H9M4 // A0A1S3S1F2 // B5DGT9 // B5XB51 // A0A1S3LSB6 // B5XE29 // A0A1S3Q6S9 // B9EM22 // A0A1S3PFE0 // A0A1S3PGK8 // B5XGF1 // A0A1S3L341 // B5DGL3 // A0A1S3Q086 // B5X5Z9 // B5DGU0 // O73866 // B5X3H5 // B5X3K2 // A0A1S3PV75 // A0A1S3MIQ1 // B9EM17 // B5XDN9 // A0A1S3PYV6 // B5X1B5 // A0A1S3P282 // A0A1S3Q707 // B5DGM7 // A0A1S3KRF0 // A0A1S3SS19 // A0A1S3LBJ0 // B5XB10 // A0A1S3…
GO:0045087	BP	innate immune response	11	672	1.6369	150	65384	0.229414	7.13516	5.9e-07	2.3e-05	// C0HBD9 // S0F1A6 // B5X397 // B9ELD5 // B5X405 // B5X2V9 // Q1A3D7 // F5B7Y3 // F5B7Y2 // B5DGU4 // B5XFA3	// A0A1S3QI20 // A0A1S3N082 // A0A1S3NBM1 // A0A1S3T2H8 // A0A1S3LAM7 // B5XE24 // Q1A3D7 // A0A1S3N9M0 // A0A1S3N9M2 // B5DGT6 // B5DGU3 // B5DGT5 // A0A1S3LV19 // B5XFU9 // A0A1S3MLL4 // B5DGU4 // A0A1S3LGL6 // A0A1S3M055 // Q9DD37 // Q29W12 // Q6XQG6 // B5X3D9 // B9EPV8 // A0A1S3Q1E8 // A0A1S3MDN9 // Q800Z5 // C0H9N2 // A0A1S3RFT8 // M4V2E4 // A0A1S3MHJ4 // A0A3G9EPZ0 // A0A1S3SEA0 // A0A1S3NR…
GO:0009152	BP	purine ribonucleotide biosynthetic process	11	672	1.6369	177	65384	0.270708	6.04674	3e-06	9.7e-05	// B5XCJ8 // B5DGM5 // B5DGC6 // B5DG78 // B5RI36 // B5XAD3 // B5XCA1 // B5X8U4 // B5XCD3 // B5X195 // C0H945	// A0A1S3MIB4 // A0A1S3PSZ6 // A0A1S3T6P8 // A0A1S3P9I9 // A0A1S2X0C2 // B5XGG0 // B5XBZ7 // B5XDF0 // A0A1S3R5N6 // A0A1S3MM17 // B5X5B0 // B5RIB1 // A0A1S3R6Y8 // A0A1S3PZF2 // B5X597 // A0A1S3MJE5 // P68529 // B5DGC9 // B5DGC6 // A0A1S3KPP8 // C0H715 // B5X626 // A0A1S3SUT6 // M4VHK7 // A0A1S3LIL6 // W0LQS8 // A0A1S3MM09 // B5XAW0 // B5X6L8 // C0H8Y0 // A0A1S3LJF5 // E2JDJ1 // B5XE35 // A0A1S3…
GO:0006164	BP	purine nucleotide biosynthetic process	11	672	1.6369	273	65384	0.417533	3.92042	0.00016	0.0037	// B5XCJ8 // B5DGM5 // B5DGC6 // B5DG78 // B5RI36 // B5XAD3 // B5XCA1 // B5X8U4 // B5XCD3 // B5X195 // C0H945	// A0A1S3SRU1 // A0A1S3SRU0 // A0A1S3PSZ6 // A0A1S3T6P8 // A0A1S3P9I9 // A0A1S2X0C2 // A0A1S3NUH3 // C0H976 // B5XGG0 // A0A1S3NLU5 // A0A1S3NLU6 // B5XDF0 // A0A1S3PJU2 // A0A1S3MM17 // B5X5B0 // B5RIB1 // B5XBZ7 // A0A1S3R6Y8 // A0A1S3PZF2 // B5X597 // A0A1S3S940 // A0A1S3MJE5 // A0A1S3PV85 // P68529 // B5DGC9 // B5DGC6 // A0A1S3Q0L4 // A0A1S3KPP8 // C0H9G2 // A0A1S3NZP4 // C0H715 // A0A1S3RMI6…
GO:0006096	BP	glycolysis	10	672	1.4881	81	65384	0.123884	12.0121	1.4e-08	9.1e-07	// B5X3H5 // B5X3K2 // B5DFX8 // B5X1B5 // B5X0U6 // I0J1J2 // I0J1J3 // C0H9I1 // B5X0R8 // B5XE29	// B5XG76 // A0A1S3Q707 // A0A1S3LSB6 // B5DGM7 // Q2A665 // A0A1S3NPZ5 // B5X5Z9 // A0A1S3KRF0 // A0A1S3S1F2 // A0A1S3N190 // B5DGR3 // B5X0U6 // B5DGR5 // B5XD43 // B5DGU0 // A0A1S2WZE0 // I0J1J2 // B5XB92 // A0A1S2WZE3 // C0H9I1 // C0H7T1 // B5XE29 // Q91461 // A0A1S3L6R8 // B9EM22 // A0A1S3PFE0 // A0A1S3LBJ0 // B5DGL3 // A0A1S3PGK8 // B5XGF1 // A0A1S3RSZ1 // A0A1S3NPG7 // A0A1S3L4W8 // B5X3H5…
GO:0009142	BP	nucleoside triphosphate biosynthetic process	10	672	1.4881	113	65384	0.172825	8.61041	3.3e-07	1.5e-05	// B5XCJ8 // B5DGM5 // B5DGC6 // B5DG78 // B5X434 // B5RI36 // B5XAD3 // B5X8U4 // B5XCD3 // B5X195	// A0A1S3S795 // A0A1S3PAS6 // A0A1S3LI38 // B5XGG0 // B5XDF0 // A0A1S3R5N6 // B5X5B0 // B5RIB1 // A0A1S3KJA5 // B5X597 // B5X4W4 // A0A1S3R5J6 // B5DGC9 // A0A1S3MG06 // B5DGC6 // C0H715 // B5X626 // A0A1S3SUT6 // M4VHK7 // W0LQS8 // B5XAW0 // B5X6L8 // E2JDJ1 // B5XE35 // A0A1S3P0X0 // A0A1S3SBG2 // A0A1S3SBG4 // B5XEN1 // C0H9B7 // A0A1S3NYI0 // B5DH26 // B5X195 // B5DGM5 // B5DGM6 // B5X5F2 /…
GO:0010033	BP	response to organic substance	10	672	1.4881	272	65384	0.416004	3.57712	0.00063	0.012	// B5X3V1 // C0H8U1 // B5X397 // B9ELD5 // C0HBD9 // C0HAX5 // Q9W6K6 // Q5J7P6 // B5DGU4 // C6KE15	// E2JDK0 // B5X6M2 // A0A1S3PCS7 // A0A1S3NKW2 // B5XBV3 // A0A1S3RXI0 // A0A1S3RMK1 // A0A1S3PPP8 // A0A1S3MWD4 // A0A1S3MYY9 // Q7T2G8 // B5DGT6 // B5DGT5 // C0HBD9 // A0A1S3N647 // A0A1S3L229 // A0A1S3SBF1 // A0A1S3PZW8 // A0A1S3REW4 // A0A1S3RXA4 // A0A1S3M504 // A0A1S3RW79 // A0A1S3NDR3 // A0A1S3NKG6 // A0A1S3RNW8 // A0A1S3RKE4 // A0A1S3RW75 // Q29W12 // A0A1S3RW71 // B5X397 // A0A1S3M574 /…
GO:0034660	BP	ncRNA metabolic process	10	672	1.4881	300	65384	0.458828	3.24325	0.0013	0.024	// B5X3A5 // B5XCP6 // B5X4V1 // B5XCB1 // B5X4H4 // B5X4E3 // C0H9P1 // B5X340 // C0H9J3 // C0HA69	// A0A1S3KK07 // A0A1S3P8D4 // A0A1S3PPI1 // A0A1S3MET0 // A0A1S3STH6 // B5X1G4 // A0A1S3NX36 // A0A1S3QCZ7 // A0A1S3SVL1 // A0A1S3M5F7 // A0A1S3L2M8 // C0HA69 // A0A1S3MHZ6 // A0A1S3RZ57 // A0A1S3P6R5 // A0A1S3NU34 // A0A1S3PAK7 // A0A1S3S717 // A0A1S3PT17 // B5XAY9 // A0A1S3Q247 // A0A1S3LRZ3 // A0A1S3KNU1 // A0A1S3ST52 // A0A1S2X0J6 // A0A1S3LV16 // A0A1S3NVJ1 // A0A1S3LLW4 // A0A1S3KKB0 // A0…
GO:0046034	BP	ATP metabolic process	9	672	1.33929	89	65384	0.136119	9.83909	4.1e-07	1.8e-05	// B5DGM5 // B5X8U4 // B5DG78 // C0H9X1 // B5RI36 // B5XAD3 // B5XCA1 // B5XD97 // B5X195	// B5X161 // B5XDF0 // B5X5B0 // A0A1S3PZF2 // B5X597 // A0A1S3P9I9 // B5DGC9 // A0A1S3L1F9 // C0H715 // B5XD97 // B5X626 // M4VHK7 // W0LQS8 // B5X6L8 // E2JDJ1 // B5XGG0 // B5RIB1 // B5XEN1 // A0A1S3NYI0 // B5DH26 // B5X195 // A0A1S3KYH8 // B5DGM5 // B5DGM6 // C0H9X1 // B5X5F2 // B5X6S0 // B5XFD0 // B5X274 // B5XB37 // A0A1S3RQN1 // B5XAD3 // Q35920 // B5DGN1 // B5DGN2 // B5DGN3 // B5X9X1 // B5…
GO:0009201	BP	ribonucleoside triphosphate biosynthetic process	9	672	1.33929	111	65384	0.169766	7.889	2.7e-06	8.8e-05	// B5XCJ8 // B5DGC6 // B5DG78 // B5X434 // B5RI36 // B5XAD3 // B5X195 // B5XCD3 // B5X8U4	// A0A1S3S795 // A0A1S3PAS6 // A0A1S3LI38 // B5XGG0 // B5XDF0 // A0A1S3R5N6 // B5X5B0 // B5RIB1 // A0A1S3KJA5 // B5X597 // B5X4W4 // A0A1S3R5J6 // B5DGC9 // A0A1S3MG06 // B5DGC6 // C0H715 // B5X626 // A0A1S3SUT6 // M4VHK7 // W0LQS8 // B5XAW0 // B5X6L8 // E2JDJ1 // B5XE35 // A0A1S3P0X0 // A0A1S3SBG2 // A0A1S3SBG4 // B5XEN1 // C0H9B7 // A0A1S3NYI0 // B5DH26 // B5X195 // B5X5F2 // B5X6S0 // B5XB37 /…
GO:0009206	BP	purine ribonucleoside triphosphate biosynthetic process	8	672	1.19048	93	65384	0.142237	8.36969	6.1e-06	0.00019	// B5XCJ8 // B5DGC6 // B5DG78 // B5RI36 // B5XAD3 // B5X195 // B5XCD3 // B5X8U4	// B5XDF0 // A0A1S3R5N6 // B5X5B0 // B5RIB1 // B5X597 // A0A1S3R5J6 // B5DGC9 // B5DGC6 // C0H715 // B5X626 // A0A1S3SUT6 // M4VHK7 // W0LQS8 // B5XAW0 // B5X6L8 // E2JDJ1 // B5XE35 // B5XGG0 // A0A1S3SBG2 // A0A1S3SBG4 // B5XEN1 // A0A1S3P0X0 // A0A1S3NYI0 // B5DH26 // B5X195 // B5X5F2 // B5X6S0 // B5XB37 // A0A1S3RQN1 // B5XA37 // B5XAD3 // Q35920 // A0A1S3LCC2 // B5DGN1 // B5DGN2 // B5DGN3 // …
GO:0009145	BP	purine nucleoside triphosphate biosynthetic process	8	672	1.19048	93	65384	0.142237	8.36969	6.1e-06	0.00019	// B5XCJ8 // B5DGC6 // B5DG78 // B5RI36 // B5XAD3 // B5X195 // B5XCD3 // B5X8U4	// B5XDF0 // A0A1S3R5N6 // B5X5B0 // B5RIB1 // B5X597 // A0A1S3R5J6 // B5DGC9 // B5DGC6 // C0H715 // B5X626 // A0A1S3SUT6 // M4VHK7 // W0LQS8 // B5XAW0 // B5X6L8 // E2JDJ1 // B5XE35 // B5XGG0 // A0A1S3SBG2 // A0A1S3SBG4 // B5XEN1 // A0A1S3P0X0 // A0A1S3NYI0 // B5DH26 // B5X195 // B5X5F2 // B5X6S0 // B5XB37 // A0A1S3RQN1 // B5XA37 // B5XAD3 // Q35920 // A0A1S3LCC2 // B5DGN1 // B5DGN2 // B5DGN3 // …
GO:0009116	BP	nucleoside metabolic process	8	672	1.19048	177	65384	0.270708	4.39763	0.00057	0.011	// B5XCJ8 // B5DGC6 // B5X1I0 // C0H9E7 // B5X434 // B5X2W8 // B5X3F7 // B5XCD3	// A0A1S3NE69 // A0A1S3S795 // A0A1S3RMY7 // A0A1S3PAS6 // A0A1S3LT56 // A0A1S3LI38 // A0A1S3MP04 // C0H8Q7 // B5X5J2 // A0A1S3R5N6 // A0A1S3MM17 // A0A1S3KJA5 // A0A1S3Q5S5 // A0A1S3KZ43 // B5X4W4 // A0A1S3PWI0 // A0A1S3MG06 // B5DGC6 // A0A1S3KPP8 // A0A1S3Q916 // C0H9E7 // A0A1S3S3P9 // A0A1S3SZL9 // A0A1S3KUT9 // B5XAW0 // C0HBQ0 // A0A1S3KPI9 // A0A1S3KNR1 // B5XE35 // A0A1S3N978 // A0A1S3KV…
GO:0009119	BP	ribonucleoside metabolic process	7	672	1.04167	121	65384	0.185061	5.62879	0.00028	0.0061	// B5XCJ8 // B5DGC6 // B5X1I0 // C0H9E7 // B5X434 // B5X2W8 // B5XCD3	// A0A1S3S795 // A0A1S3RMY7 // A0A1S3PAS6 // A0A1S3LT56 // A0A1S3LI38 // B5X5J2 // A0A1S3R5N6 // A0A1S3MM17 // A0A1S3KJA5 // C0H8K5 // A0A1S3KZ43 // B5X4W4 // A0A1S3PWI0 // A0A1S3MG06 // B5DGC6 // A0A1S3KPP8 // A0A1S3SLG3 // C0H9E7 // B5XCD3 // A0A1S3SUT6 // B5XAW0 // C0HBQ0 // A0A1S3QS03 // B5XE35 // C0H8Q7 // A0A1S3SBG2 // A0A1S3SBG4 // A0A1S3P3G3 // C0H9B7 // A0A1S3SLF0 // B5XD88 // A0A1S3NDH8…
GO:0006213	BP	pyrimidine nucleoside metabolic process	6	672	0.892857	52	65384	0.0795302	11.2266	1.6e-05	0.00047	// B5XCJ8 // B5DGC6 // B5X434 // B5X2W8 // B5X3F7 // B5XCD3	// A0A1S3S795 // A0A1S3PAS6 // B5XE40 // A0A1S3KVZ9 // A0A1S3LGW9 // A0A1S3LI38 // A0A1S3R5N6 // A0A1S3Q4S4 // A0A1S3KW36 // A0A1S3PMN3 // A0A1S3QMQ1 // A0A1S3KJA5 // A0A1S3NWR5 // B9EPL6 // B5XAW0 // B5XCJ8 // A0A1S3KXC9 // B5X4W4 // B5XB15 // A0A1S3MG06 // B5DGC6 // B5XA37 // B5X434 // B5X2W8 // B5X3F7 // B5XE35 // B5XCD3 // A0A1S3SUT6 // O57560 // A0A1S3KLG4 // A0A1S3LCC2 // C0HBQ0 // A0A1S3SU…
GO:0006220	BP	pyrimidine nucleotide metabolic process	6	672	0.892857	60	65384	0.0917656	9.72976	3.8e-05	0.001	// B5XCJ8 // B5DGC6 // B5XBW6 // B5X434 // B5X2W8 // B5XCD3	// A0A1S3S795 // B5XE35 // B5XE40 // A0A1S3KVZ9 // A0A1S3LGW9 // A0A1S3LI38 // A0A1S3PAS6 // A0A1S3R5N6 // A0A1S3Q4S4 // A0A1S3KW36 // A0A1S3PMN3 // A0A1S3QMQ1 // A0A1S3KJA5 // A0A1S3QF21 // B9EPL6 // B5XAW0 // B5XCJ8 // A0A1S3KXC9 // A0A1S3NWR5 // B5X4W4 // B5XB15 // A0A1S3MG06 // B5XCJ1 // B5X868 // B5XA37 // B5X434 // B5X2W8 // B5DGC6 // C0H809 // A0A1S3SK07 // B5XCD3 // A0A1S3SUT6 // O57560 /…
GO:0045010	BP	actin nucleation	6	672	0.892857	121	65384	0.185061	4.82468	0.0017	0.03	// B9EMH3 // B9EP59 // C0PU35 // B5DGD5 // B5XCW2 // C0H9H2	// B5X9U3 // B5XG16 // A0A1S3SMG0 // B5XBV0 // A0A1S3SMG2 // A0A1S3SMG3 // A0A1S3KPH3 // A0A1S3MAZ4 // A0A1S3Q2Y2 // B5X6M8 // C0PUI5 // B9EMV2 // A0A1S3KL27 // A0A1S3M662 // B5XGN2 // A0A1S3L4F4 // B5X7J0 // B5X7J3 // A0A1S3RX20 // A0A1S3MBB0 // A0A1S3S073 // A0A1S3SMF8 // A0A1S3NSW4 // A0A1S3SMF5 // A0A1S3N5E1 // A0A1S3NFD8 // B5X7L8 // A0A1S3T5Q8 // A0A1S3MMA6 // B9EM18 // B5DGD5 // A0A1S3MNK0…
GO:0030041	BP	actin filament polymerization	6	672	0.892857	130	65384	0.198825	4.49066	0.0024	0.042	// B5X2M7 // C0PU35 // B5DGD5 // B5XCW2 // B5X3R3 // B5DG56	// A0A1S3L0N8 // B5X9U3 // A0A1S3LEU6 // C0HBN3 // C0PUI5 // C0HBN6 // A0A1S3REW2 // A0A1S3PES9 // A0A1S3L112 // B5XGN2 // B5X7J0 // A0A1S3L0K8 // A0A1S3PES7 // A0A1S3P463 // A0A1S3RG96 // A0A1S3PRY0 // A0A1S3RBG3 // B5X7L8 // A0A1S3RJ34 // B9ELH8 // A0A1S3QSA1 // A0A1S3RJ33 // A0A1S3LEE2 // A0A1S3N1N6 // B5X5R2 // A0A1S3LUZ9 // B5X2M7 // A0A1S3P6B3 // B5DGD5 // A0A1S3QR64 // A0A1S3RJ29 // A0A1S3…
GO:0009218	BP	pyrimidine ribonucleotide metabolic process	5	672	0.744048	48	65384	0.0734125	10.1352	0.00014	0.0034	// B5X434 // B5DGC6 // B5X2W8 // B5XCD3 // B5XCJ8	// A0A1S3S795 // A0A1S3PAS6 // B5XE40 // A0A1S3LGW9 // A0A1S3LI38 // A0A1S3R5N6 // A0A1S3Q4S4 // A0A1S3PMN3 // A0A1S3QMQ1 // A0A1S3KJA5 // A0A1S3NWR5 // B9EPL6 // B5XAW0 // B5XCJ8 // B5X4W4 // B5XB15 // A0A1S3MG06 // B5DGC6 // B5XA37 // B5X434 // B5X2W8 // B5XE35 // B5XCD3 // A0A1S3SUT6 // O57560 // A0A1S3KLG4 // A0A1S3LCC2 // C0HBQ0 // A0A1S3SUU9 // A0A1S3LH85 // B5X227 // A0A1S3NI26 // A0A1S3P0…
GO:0046131	BP	pyrimidine ribonucleoside metabolic process	5	672	0.744048	48	65384	0.0734125	10.1352	0.00014	0.0034	// B5X434 // B5DGC6 // B5X2W8 // B5XCD3 // B5XCJ8	// A0A1S3S795 // A0A1S3PAS6 // B5XE40 // A0A1S3LGW9 // A0A1S3LI38 // A0A1S3R5N6 // A0A1S3Q4S4 // A0A1S3PMN3 // A0A1S3QMQ1 // A0A1S3KJA5 // A0A1S3NWR5 // B9EPL6 // B5XAW0 // B5XCJ8 // B5X4W4 // B5XB15 // A0A1S3MG06 // B5DGC6 // B5XA37 // B5X434 // B5X2W8 // B5XE35 // B5XCD3 // A0A1S3SUT6 // O57560 // A0A1S3KLG4 // A0A1S3LCC2 // C0HBQ0 // A0A1S3SUU9 // A0A1S3LH85 // B5X227 // A0A1S3NI26 // A0A1S3P0…
GO:0009220	BP	pyrimidine ribonucleotide biosynthetic process	5	672	0.744048	48	65384	0.0734125	10.1352	0.00014	0.0034	// B5X434 // B5DGC6 // B5X2W8 // B5XCD3 // B5XCJ8	// A0A1S3S795 // A0A1S3PAS6 // B5XE40 // A0A1S3LGW9 // A0A1S3LI38 // A0A1S3R5N6 // A0A1S3Q4S4 // A0A1S3PMN3 // A0A1S3QMQ1 // A0A1S3KJA5 // A0A1S3NWR5 // B9EPL6 // B5XAW0 // B5XCJ8 // B5X4W4 // B5XB15 // A0A1S3MG06 // B5DGC6 // B5XA37 // B5X434 // B5X2W8 // B5XE35 // B5XCD3 // A0A1S3SUT6 // O57560 // A0A1S3KLG4 // A0A1S3LCC2 // C0HBQ0 // A0A1S3SUU9 // A0A1S3LH85 // B5X227 // A0A1S3NI26 // A0A1S3P0…
GO:0006221	BP	pyrimidine nucleotide biosynthetic process	5	672	0.744048	56	65384	0.0856479	8.68729	0.00029	0.0061	// B5X434 // B5DGC6 // B5X2W8 // B5XCD3 // B5XCJ8	// A0A1S3S795 // A0A1S3PAS6 // B5XE40 // A0A1S3KVZ9 // A0A1S3LGW9 // A0A1S3LI38 // A0A1S3R5N6 // A0A1S3Q4S4 // A0A1S3KW36 // A0A1S3PMN3 // A0A1S3QMQ1 // A0A1S3KJA5 // A0A1S3QF21 // B9EPL6 // B5XAW0 // B5XCJ8 // A0A1S3KXC9 // A0A1S3NWR5 // B5X4W4 // B5XB15 // A0A1S3MG06 // B5XCJ1 // B5X868 // B5XA37 // B5X434 // B5X2W8 // B5DGC6 // C0H809 // B5XE35 // B5XCD3 // A0A1S3SUT6 // O57560 // A0A1S3KLG4 /…
GO:0034314	BP	Arp2/3 complex-mediated actin nucleation	5	672	0.744048	63	65384	0.0963538	7.72203	0.0005	0.01	// B9EMH3 // B5XCW2 // C0H9H2 // B9EP59 // B5DGD5	// B5X9U3 // B5XG16 // B5X6M8 // C0HBR6 // A0A1S3S020 // A0A1S3L3P3 // A0A1S3NVZ4 // C0PUS8 // C0H8E0 // B5XE62 // B5X8R6 // B9ELI3 // B9EMV2 // B5XGW7 // A0A1S3KL27 // A0A1S3N627 // A0A1S3ST17 // A0A1S3QRD5 // A0A1S3MVA4 // A0A1S3ST11 // B5XCW2 // B5XGN2 // A0A1S3L4F4 // B5X7J0 // B5XE91 // B5X7J3 // A0A1S3L3B9 // B5XGH1 // B5XBU8 // A0A1S3QAB7 // B9EMH3 // B5XFQ5 // A0A1S3N5U5 // A0A1S3L385 // …
GO:0015985	BP	energy coupled proton transport, down electrochemical gradient	5	672	0.744048	70	65384	0.10706	6.94983	0.00081	0.015	// B5RI36 // B5XAD3 // B5X8U4 // B5X195 // B5DG78	// B5DG78 // B5XAI3 // P68529 // B5XBT8 // B5X9Q3 // C0H702 // B5XGG0 // B5XDF0 // A0A1S3NWP8 // B5X4S6 // B5XGB9 // B5X5B0 // B5XF93 // B5X5F2 // M4UZU2 // B5XB94 // B9ENJ3 // B5X597 // B5XB37 // B5X932 // A0A1S3PEL4 // B5XA73 // A0A1S3RQN1 // B5X6L8 // B5XCL0 // B5XCB0 // C0H715 // B5XAD3 // B5XAI5 // Q35920 // B5XDM0 // M4VHK7 // B5X9A5 // W0LQS8 // B5XB87 // B5X5E2 // A0A1S3LGZ3 // B5XCS5 // …
GO:0015986	BP	ATP synthesis coupled proton transport	5	672	0.744048	70	65384	0.10706	6.94983	0.00081	0.015	// B5RI36 // B5XAD3 // B5X8U4 // B5X195 // B5DG78	// B5DG78 // B5XAI3 // P68529 // B5XBT8 // B5X9Q3 // C0H702 // B5XGG0 // B5XDF0 // A0A1S3NWP8 // B5X4S6 // B5XGB9 // B5X5B0 // B5XF93 // B5X5F2 // M4UZU2 // B5XB94 // B9ENJ3 // B5X597 // B5XB37 // B5X932 // A0A1S3PEL4 // B5XA73 // A0A1S3RQN1 // B5X6L8 // B5XCL0 // B5XCB0 // C0H715 // B5XAD3 // B5XAI5 // Q35920 // B5XDM0 // M4VHK7 // B5X9A5 // W0LQS8 // B5XB87 // B5X5E2 // A0A1S3LGZ3 // B5XCS5 // …
GO:0006754	BP	ATP biosynthetic process	5	672	0.744048	70	65384	0.10706	6.94983	0.00081	0.015	// B5RI36 // B5XAD3 // B5X8U4 // B5X195 // B5DG78	// B5DG78 // B5XAI3 // P68529 // B5XBT8 // B5X9Q3 // C0H702 // B5XGG0 // B5XDF0 // A0A1S3NWP8 // B5X4S6 // B5XGB9 // B5X5B0 // B5XF93 // B5X5F2 // M4UZU2 // B5XB94 // B9ENJ3 // B5X597 // B5XB37 // B5X932 // A0A1S3PEL4 // B5XA73 // A0A1S3RQN1 // B5X6L8 // B5XCL0 // B5XCB0 // C0H715 // B5XAD3 // B5XAI5 // Q35920 // B5XDM0 // M4VHK7 // B5X9A5 // W0LQS8 // B5XB87 // B5X5E2 // A0A1S3LGZ3 // B5XCS5 // …
GO:0006818	BP	hydrogen transport	5	672	0.744048	71	65384	0.108589	6.85195	0.00087	0.016	// B5RI36 // B5XAD3 // B5X8U4 // B5X195 // B5DG78	// B5DG78 // B5XAI3 // P68529 // B5XBT8 // B5X9Q3 // C0H702 // B5XGG0 // B5XDF0 // A0A1S3NWP8 // B5X4S6 // B5XGB9 // B5X5B0 // B5XF93 // B5X5F2 // M4UZU2 // B5XB94 // B9ENJ3 // A0A1S3SKP0 // B5X597 // B5XB37 // B5X932 // A0A1S3PEL4 // B5XA73 // A0A1S3RQN1 // B5X6L8 // B5XCL0 // B5XCB0 // C0H715 // B5XAD3 // B5XAI5 // Q35920 // B5XDM0 // M4VHK7 // B5X9A5 // W0LQS8 // B5XB87 // B5X5E2 // A0A1S3LGZ3…
GO:0015992	BP	proton transport	5	672	0.744048	71	65384	0.108589	6.85195	0.00087	0.016	// B5RI36 // B5XAD3 // B5X8U4 // B5X195 // B5DG78	// B5DG78 // B5XAI3 // P68529 // B5XBT8 // B5X9Q3 // C0H702 // B5XGG0 // B5XDF0 // A0A1S3NWP8 // B5X4S6 // B5XGB9 // B5X5B0 // B5XF93 // B5X5F2 // M4UZU2 // B5XB94 // B9ENJ3 // A0A1S3SKP0 // B5X597 // B5XB37 // B5X932 // A0A1S3PEL4 // B5XA73 // A0A1S3RQN1 // B5X6L8 // B5XCL0 // B5XCB0 // C0H715 // B5XAD3 // B5XAI5 // Q35920 // B5XDM0 // M4VHK7 // B5X9A5 // W0LQS8 // B5XB87 // B5X5E2 // A0A1S3LGZ3…
GO:0044424	CC	intracellular part	246	672	36.6071	15712	65384	24.0303	1.52337	2.4e-08	6.6e-07	// B5XG11 // B5DGK7 // B5X441 // B5X3R3 // Q9DE54 // C0H8R1 // C0HAZ6 // B9EQI9 // Q78BU2 // B5X4F4 // C0HAA0 // P84408 // C0PUI6 // B9EMD6 // B5DGD5 // B5XG92 // B5X3Q7 // B5XGF6 // B5X3J8 // C0H7M1 // B3TDC1 // B5DG02 // C0H935 // B5X225 // B5X186 // B5X6P4 // B9EN30 // B9ENT4 // B5X473 // B5DGL6 // C0H9W6 // C0PUJ3 // B5X5K4 // B3SU80 // B5X368 // B5X369 // B5X8F3 // C0HAB9 // B5DGK9 // C0H8J4…	// A0A1S3QDX6 // A0A1S3M645 // A0A1S3QL53 // A0A1S3QL56 // A0A1S3L4V4 // A0A1S3PLW1 // A0A1S3S8M4 // A0A1S3S8M2 // A0A1S3KXH5 // A0A1S3RQS8 // A0A1S3KXH0 // C0HBF6 // A0A1S3KXH2 // A0A1S3L0F4 // A0A1S3MQR0 // A0A1S3RIG2 // A0A1S3QY19 // A0A1S3SKN5 // A0A1S3MF27 // A0A1S3KRM2 // A0A1S3LVB0 // A0A1S3LQ91 // B5X8U5 // A0A1S3LQ97 // A0A1S3MF29 // A0A1S3PRU8 // A0A1S3S3L0 // A0A1S3QNW5 // A0A1S3LM37 /…
GO:0005622	CC	intracellular	246	672	36.6071	15713	65384	24.0319	1.52327	2.4e-08	6.6e-07	// B5XG11 // B5DGK7 // B5X441 // B5X3R3 // Q9DE54 // C0H8R1 // C0HAZ6 // B9EQI9 // Q78BU2 // B5X4F4 // C0HAA0 // P84408 // C0PUI6 // B9EMD6 // B5DGD5 // B5XG92 // B5X3Q7 // B5XGF6 // B5X3J8 // C0H7M1 // B3TDC1 // B5DG02 // C0H935 // B5X225 // B5X186 // B5X6P4 // B9EN30 // B9ENT4 // B5X473 // B5DGL6 // C0H9W6 // C0PUJ3 // B5X5K4 // B3SU80 // B5X368 // B5X369 // B5X8F3 // C0HAB9 // B5DGK9 // C0H8J4…	// A0A1S3QDX6 // A0A1S3M645 // A0A1S3QL53 // A0A1S3QL56 // A0A1S3L4V4 // A0A1S3PLW1 // A0A1S3S8M4 // A0A1S3S8M2 // A0A1S3KXH5 // A0A1S3RQS8 // A0A1S3KXH0 // C0HBF6 // A0A1S3KXH2 // A0A1S3L0F4 // A0A1S3MQR0 // A0A1S3RIG2 // A0A1S3QY19 // A0A1S3SKN5 // A0A1S3MF27 // A0A1S3KRM2 // A0A1S3LVB0 // A0A1S3LQ91 // B5X8U5 // A0A1S3LQ97 // A0A1S3MF29 // A0A1S3PRU8 // A0A1S3S3L0 // A0A1S3QNW5 // A0A1S3LM37 /…
GO:0043226	CC	organelle	198	672	29.4643	13626	65384	20.84	1.41384	1.8e-05	0.00036	// B5XG11 // B5DGK7 // B5X3R3 // B8YQA0 // Q9DE54 // C0HAZ6 // B9EQI9 // Q78BU2 // B5X4F4 // P84408 // C0PUI6 // B9EMD6 // B5XG92 // B5X3Q7 // C0H9E7 // B5X3J8 // C0H7M1 // B3TDC1 // B5DG02 // C0H935 // B5X186 // B5X6P4 // B5X397 // B9ENT4 // B5X473 // B5DGL6 // C0H9W6 // C0PU76 // B5X5K4 // B3SU80 // B5X368 // B5X369 // B5X8F3 // B5DGK9 // B9ELH2 // C0HB84 // B5X392 // C0HA77 // B5DGU4 // B5XFE9…	// A0A1S3QDX6 // A0A1S3M645 // A0A1S3QL53 // A0A1S3L4V4 // A0A1S3PLW1 // A0A1S3PJM7 // A0A1S3S8M2 // A0A1S3KXH5 // A0A1S3RQS8 // A0A1S3KXH0 // C0HBF6 // A0A1S3KXH2 // A0A1S3L0F4 // A0A1S3MQR0 // A0A1S3QY19 // A0A1S3MF27 // A0A1S3KRM2 // A0A1S3LVB0 // A0A1S3LQ91 // B5XDN0 // A0A1S3LQ97 // A0A1S3MF29 // A0A1S3PRU8 // A0A1S3QNW5 // A0A1S3LM37 // A0A1S3LM30 // A0A1S3QNW3 // B5X8F3 // C0H9F5 // C0H9F0…
GO:0043229	CC	intracellular organelle	191	672	28.4226	13583	65384	20.7742	1.36817	0.00011	0.0018	// B5XG11 // B5DGK7 // B5X3R3 // Q9DE54 // C0HAZ6 // B9EQI9 // Q78BU2 // B5X4F4 // P84408 // C0PUI6 // B9EMD6 // B5XG92 // B5X3Q7 // C0H9E7 // B5X3J8 // C0H7M1 // B3TDC1 // B5DG02 // C0H935 // B5X186 // B5X6P4 // B9ENT4 // B5X473 // B5DGL6 // C0H9W6 // C0PU76 // B5X5K4 // B3SU80 // B5X368 // B5X369 // B5X8F3 // B5DGK9 // B9ELH2 // C0HB84 // B5X392 // C0HA77 // B5DGU4 // B5XFE9 // B9EMC6 // B5X5R0…	// A0A1S3QDX6 // A0A1S3M645 // A0A1S3QL53 // A0A1S3L4V4 // A0A1S3PLW1 // A0A1S3PJM7 // A0A1S3S8M2 // A0A1S3KXH5 // A0A1S3RQS8 // A0A1S3KXH0 // C0HBF6 // A0A1S3KXH2 // A0A1S3L0F4 // A0A1S3MQR0 // A0A1S3QY19 // A0A1S3MF27 // A0A1S3KRM2 // A0A1S3LVB0 // A0A1S3LQ91 // B5XDN0 // A0A1S3LQ97 // A0A1S3MF29 // A0A1S3PRU8 // A0A1S3QNW5 // A0A1S3LM37 // A0A1S3LM30 // A0A1S3QNW3 // B5X8F3 // C0H9F5 // C0H9F0…
GO:0005737	CC	cytoplasm	164	672	24.4048	6443	65384	9.85409	2.47661	1.1e-21	1.4e-19	// B5XG11 // B5DGK7 // B5X441 // Q9DE54 // C0H8R1 // Q78BU2 // B5X4F4 // C0HAA0 // B9EMD6 // B5DGD5 // B5XG92 // C0H904 // B5XGF6 // B5X3J8 // C0H7M1 // C0HA85 // B5DG02 // C0H935 // B5X186 // B5X473 // B5DGL6 // C0H9W6 // B5X8Y9 // B5X369 // B5X8F3 // B5DGK9 // C0H8J4 // B5X392 // B5DGU4 // B5XFE9 // B5X2M8 // B9EMC6 // B9EM17 // B9EP20 // B5X1L5 // B5X193 // B5DH21 // B5XEW6 // C0HAC7 // C0H7H1…	// A0A1S3QDX6 // A0A1S3QL56 // A0A1S3L4V4 // A0A1S3PLW1 // A0A1S3S8M4 // A0A1S3S8M2 // A0A1S3KXH0 // C0H773 // A0A1S3LVB0 // C0H9S0 // A0A1S3LVB5 // A0A1S3S3L0 // A0A1S3LM30 // A0A1S3QNW3 // B5X8F3 // B5X208 // B5X207 // A0A1S3RDG3 // B5X8F8 // A0A1S3PTI0 // A0A1S3RSI8 // A0A1S3RSI3 // A0A1S3RSI2 // A0A1S3M8G6 // A0A1S3LWZ2 // A0A1S3R395 // A0A1S3S9A8 // A0A1S3S9A9 // A0A1S3S9A6 // A0A1S3S9A7 // …
GO:0032991	CC	macromolecular complex	147	672	21.875	6765	65384	10.3466	2.11423	1.6e-14	1.5e-12	// B5XG11 // B5DGK7 // B5X441 // Q9DE54 // C0H8R1 // C0HAZ6 // P84408 // V9NBI8 // B9EMD6 // B9ENF4 // B5X3J8 // C0H7M1 // B3TDC1 // B5DG02 // B5DGL6 // C0H9W6 // C0PUJ3 // B5X5K4 // B5X368 // B5X369 // C0HAB9 // B5DGK9 // C0H8J4 // B5X392 // B5DGU4 // B5DGU7 // C0PU76 // B5X2M8 // B5X1P2 // B5X386 // B5X2M3 // B5X7K7 // B9EP20 // B5DH21 // B9EPF1 // B5X195 // B5XEW6 // C0H7H1 // B5DGV7 // B5DGV2…	// A0A1S3QDX6 // A0A1S3PLW1 // A0A1S3PLW3 // A0A1S3S8M1 // A0A1S3KXH5 // C0HBF6 // A0A1S3L0F4 // A0A1S3RKC7 // A0A1S3N7P1 // A0A1S3LVB0 // A0A1S3LQ97 // A0A1S3LVB6 // A0A1S3PRU8 // A0A1S3S3L4 // A0A1S3QNW5 // A0A1S3LM30 // C0H9F5 // A0A1S3PGH0 // A0A1S3RDG0 // A0A1S3PTI0 // B5XGH1 // A0A1S3RSI8 // A0A1S3RSI5 // A0A1S3RSI3 // A0A1S3LWZ2 // A0A1S3T5G5 // A0A1S3S378 // A0A1S3PZ33 // A0A1S3PZ34 // A0…
GO:0044444	CC	cytoplasmic part	105	672	15.625	4582	65384	7.00783	2.22965	2e-12	1.5e-10	// B5DGK7 // B5DGK9 // C0H8R1 // B5X4F4 // B5XG92 // B5XFF0 // C0H9E7 // C0H7M1 // B3TDC1 // B5DG02 // B5X186 // B5X473 // B5DGL6 // C0H9W6 // B5X8Y9 // B5X369 // B5X8F3 // C0H8J4 // B5X392 // B5X2M8 // B5X2M3 // B9EP20 // C0H935 // B5XEW6 // C0H7H1 // B5DGV7 // B5DGV2 // C0HAC0 // B5X3E3 // A7KIL2 // B5X8X3 // B5X8P4 // B5XET4 // B5XG51 // B5X5S8 // B5XAD3 // C7C1L7 // B5XDP1 // C0H7C6 // B5DGW2…	// B9EPU0 // A0A1S3L4V4 // B5X117 // A0A1S3QYD5 // B9EPU7 // B5DGJ3 // A0A1S3KK75 // B5X449 // A0A1S3QMW9 // A0A1S3T3E6 // A0A1S3N4I6 // A0A1S3SPI9 // A0A1S3SPI8 // A0A1S3PLW1 // B9EMQ1 // A0A1S3S5T4 // A0A1S3S2A6 // B5RI65 // B5RI66 // A0A1S3Q5Y7 // A0A1S3SPI6 // B5X9J4 // A0A1S3SPI4 // A0A1S3NTE2 // A0A1S3KXH0 // B5X591 // A0A1S3KJP9 // A0A1S3SF11 // A0A1S3KJP7 // A0A1S3SF13 // B9EQ57 // C0H773…
GO:0043234	CC	protein complex	90	672	13.3929	5843	65384	8.93644	1.49868	0.00033	0.0044	// B5XG11 // B5X441 // Q9DE54 // C0H8R1 // V9NBI8 // B5XCW2 // B5X3J8 // B3TDC1 // C0H9W6 // C0PU76 // B5X5K4 // B5X368 // C0HAB9 // C0H8J4 // B5DGU4 // B5DGU7 // B5XFE9 // B5X2M8 // B5X1P2 // B5DGD5 // B5X7K7 // B9EPF1 // B5X195 // B5DH24 // C0HAC0 // B5X674 // C0H9X1 // B5X8P4 // B9EMK0 // B5X2M3 // B5DGE8 // B9EMD6 // B5XAD3 // B9EMD3 // B5X4X4 // B5X386 // B5X6J1 // B5XA06 // C0H9H2 // B5X7V8…	// A0A1S3QDX6 // A0A1S3PLW1 // A0A1S3PLW3 // A0A1S3S8M1 // A0A1S3KXH5 // C0HBF6 // A0A1S3L0F4 // A0A1S3N7P1 // A0A1S3LVB0 // A0A1S3LQ97 // A0A1S3LVB6 // A0A1S3PRU8 // A0A1S3S3L4 // A0A1S3QNW5 // A0A1S3LM30 // C0H9F5 // A0A1S3PGH0 // A0A1S3RDG0 // A0A1S3PTI0 // B5XGH1 // A0A1S3RSI5 // A0A1S3RSI3 // A0A1S3LWZ2 // A0A1S3T5G5 // A0A1S3S378 // A0A1S3PZ33 // A0A1S3PZ34 // A0A1S3L9T8 // A0A1S3MEA6 // A0…
GO:0043232	CC	intracellular non-membrane-bounded organelle	89	672	13.244	3693	65384	5.64817	2.34484	5.6e-12	2.2e-10	// B5DGK7 // B5DGK9 // B9EQI9 // Q78BU2 // P84408 // C0H7M1 // B5DG02 // B5DGL6 // C0H9W6 // C0PU76 // B5X369 // B9ELH2 // C0HB84 // B5XFE9 // B5X5R0 // B5DGD5 // B9EP20 // B5DH21 // B5XEW6 // C0H7H1 // B5DGV7 // B5DGV2 // B5DGV3 // A7KIL2 // B5X8X3 // B5X2M3 // B5XET4 // B5DGE8 // B5X5S8 // B5XCW2 // B9EMD3 // C0H823 // B5XDP1 // C0H7C6 // B5DGW2 // B5X668 // B5DGW8 // B5X6R2 // B5XAM0 // C0H9H2…	// B9EPU0 // A0A1S3P0J6 // A0A1S3P0J5 // A0A1S3KK75 // A0A1S3SVU4 // A0A1S3RU04 // A0A1S3SPI8 // A0A1S3PLW1 // Q78BU2 // B5XC30 // A0A1S3R717 // A0A1S3SPI6 // A0A1S3R715 // A0A1S3SPI4 // A0A1S3RQS8 // A0A1S3MQR9 // B5X592 // A0A1S3KXH2 // A0A1S3PYC1 // B9EQ57 // B5X599 // A0A1S3SBN8 // A0A1S3N3P3 // B5X841 // B5X840 // A0A1S3LVB5 // A0A1S3MSB2 // A0A1S3PRU8 // A0A1S3P7T7 // A0A1S3M0R3 // A0A1S3PY…
GO:0043228	CC	non-membrane-bounded organelle	89	672	13.244	3693	65384	5.64817	2.34484	5.6e-12	2.2e-10	// B5DGK7 // B5DGK9 // B9EQI9 // Q78BU2 // P84408 // C0H7M1 // B5DG02 // B5DGL6 // C0H9W6 // C0PU76 // B5X369 // B9ELH2 // C0HB84 // B5XFE9 // B5X5R0 // B5DGD5 // B9EP20 // B5DH21 // B5XEW6 // C0H7H1 // B5DGV7 // B5DGV2 // B5DGV3 // A7KIL2 // B5X8X3 // B5X2M3 // B5XET4 // B5DGE8 // B5X5S8 // B5XCW2 // B9EMD3 // C0H823 // B5XDP1 // C0H7C6 // B5DGW2 // B5X668 // B5DGW8 // B5X6R2 // B5XAM0 // C0H9H2…	// B9EPU0 // A0A1S3P0J6 // A0A1S3P0J5 // A0A1S3KK75 // A0A1S3SVU4 // A0A1S3RU04 // A0A1S3SPI8 // A0A1S3PLW1 // Q78BU2 // B5XC30 // A0A1S3R717 // A0A1S3SPI6 // A0A1S3R715 // A0A1S3SPI4 // A0A1S3RQS8 // A0A1S3MQR9 // B5X592 // A0A1S3KXH2 // A0A1S3PYC1 // B9EQ57 // B5X599 // A0A1S3SBN8 // A0A1S3N3P3 // B5X841 // B5X840 // A0A1S3LVB5 // A0A1S3MSB2 // A0A1S3PRU8 // A0A1S3P7T7 // A0A1S3M0R3 // A0A1S3PY…
GO:0044446	CC	intracellular organelle part	89	672	13.244	5582	65384	8.53726	1.55132	0.00013	0.0019	// B5DGK9 // C0HAZ6 // B5X4F4 // P84408 // B5XCW2 // B5XG92 // B5X2W8 // B9ENF4 // B5X3J8 // B5XAD3 // B5X186 // B5DGL6 // C0H9W6 // C0PU76 // B5X5K4 // B5X368 // B5X369 // C0H9E7 // B9EQI9 // B5XFE9 // B5X5R0 // B5X2M3 // B9EP20 // B5XDQ0 // B5XEW6 // B5DGV7 // B5DGV2 // B5X674 // A7KIL2 // B5DGD5 // B5DGE8 // B9EMD6 // B3TDC1 // B9EMD3 // C0H823 // C0PUB5 // B5X6R0 // C0H9H2 // B5X4P9 // B5XCA1…	// A0A1S3QDX6 // A0A1S3PLW1 // A0A1S3S8M2 // A0A1S3KXH5 // A0A1S3MQR9 // C0HBF6 // A0A1S3KXH2 // A0A1S3RKC7 // A0A1S3LVB0 // A0A1S3LQ97 // A0A1S3LVB6 // A0A1S3PRU8 // A0A1S3QNW5 // A0A1S3LM37 // A0A1S3LM30 // A0A1S3QNW3 // C0H9F5 // B5X208 // B5X207 // A0A1S3RDG0 // A0A1S3PTI0 // B5XGH1 // A0A1S3RSI5 // A0A1S3RSI3 // A0A1S3LWZ2 // A0A1S3Q7H1 // A0A1S3T5G5 // B5X6J8 // A0A1S3S378 // A0A1S3PZ33 // …
GO:0044422	CC	organelle part	89	672	13.244	5624	65384	8.60149	1.53974	0.00016	0.0022	// B5DGK9 // C0HAZ6 // B5X4F4 // P84408 // B5XCW2 // B5XG92 // B5X2W8 // B9ENF4 // B5X3J8 // B5XAD3 // B5X186 // B5DGL6 // C0H9W6 // C0PU76 // B5X5K4 // B5X368 // B5X369 // C0H9E7 // B9EQI9 // B5XFE9 // B5X5R0 // B5X2M3 // B9EP20 // B5XDQ0 // B5XEW6 // B5DGV7 // B5DGV2 // B5X674 // A7KIL2 // B5DGD5 // B5DGE8 // B9EMD6 // B3TDC1 // B9EMD3 // C0H823 // C0PUB5 // B5X6R0 // C0H9H2 // B5X4P9 // B5XCA1…	// A0A1S3QDX6 // A0A1S3PLW1 // A0A1S3S8M2 // A0A1S3KXH5 // A0A1S3MQR9 // C0HBF6 // A0A1S3KXH2 // A0A1S3L0F4 // A0A1S3RKC7 // A0A1S3LVB0 // A0A1S3LQ97 // A0A1S3LVB6 // A0A1S3PRU8 // A0A1S3QNW5 // A0A1S3LM37 // A0A1S3LM30 // A0A1S3QNW3 // C0H9F5 // B5X208 // B5X207 // A0A1S3RDG0 // A0A1S3PTI0 // B5XGH1 // A0A1S3RSI5 // A0A1S3RSI3 // A0A1S3LWZ2 // A0A1S3Q7H1 // A0A1S3T5G5 // B5X6J8 // A0A1S3S378 // …
GO:0030529	CC	ribonucleoprotein complex	55	672	8.18452	899	65384	1.37495	5.95258	1.7e-24	6.7e-22	// B5DGK7 // C0H7H1 // B9ELK0 // B5DGV2 // B5DGV3 // B5DGX5 // A7KIL2 // B5DGX3 // B5X8X3 // B5DGX1 // B5DGV7 // B9ENF4 // C0HAZ6 // B5X0W4 // B5XGB0 // B5XET4 // B5X5W5 // B5X5S8 // C0H8G4 // C0H7M1 // B5X3Q6 // B5DG02 // B5DG42 // C0PUB5 // C0H7C6 // B5X1L5 // B5DGW2 // B5DGL6 // B5X668 // C0PUJ3 // B5XBW2 // B5DGY4 // B9ENX2 // B5DGW8 // B5XF07 // B5X369 // B5XDA7 // B5XDP1 // B5X6R2 // B5DGK9…	// B9EPU0 // B9EQB9 // E0R886 // C0H7J7 // A0A1S3NX36 // A0A1S3N6S7 // B5XC90 // B5XC98 // C0HAZ6 // B5XE21 // A0A1S3NNS5 // A0A1S3R499 // B5XAL7 // B5X7S7 // A0A1S3SPI6 // B5XC93 // C0H8C7 // A0A1S3PT98 // B5XA57 // B5XA55 // B9EQ57 // B5XGF4 // B5X599 // A0A1S3P0A8 // B5X7J4 // C0H7M1 // C0H7M0 // B5DG02 // B5DG01 // B5X841 // B5X840 // C0H7M9 // B5XEV6 // A0A1S3MSB2 // B5DGL2 // B9EME3 // B5DG…
GO:0005840	CC	ribosome	46	672	6.84524	621	65384	0.949774	7.20723	3.5e-24	6.7e-22	// B5DGK7 // C0H7H1 // B9ELK0 // B5DGV2 // B5DGV3 // B5DGX5 // A7KIL2 // B5DGX3 // B5X8X3 // B5DGX1 // B5DGV7 // B5XGB0 // B5XET4 // B5X5W5 // B5X5S8 // C0H8G4 // C0H7M1 // B5X3Q6 // B5DG02 // B5XDP1 // C0H7C6 // B5DGW2 // B5DGL6 // B5X668 // B5XBW2 // B5DGY4 // B9ENX2 // B5DGW8 // B5X369 // B5XDA7 // B5X6R2 // B5DGK9 // B5DGJ6 // B5X7R3 // B9ELY8 // B5DGB4 // B5XAX9 // B5X6X8 // B5XG87 // B5XCK4…	// B9EPU0 // B9EQB9 // C0H7J7 // A0A1S3N6S7 // B5XC98 // A0A1S3QZ96 // A0A1S3NNS5 // B5RI65 // B5XAL7 // B5X7S7 // B5XC90 // B5RI62 // C0H8C7 // B9EQ57 // B5X599 // B5X7J4 // C0H7M1 // C0H7M0 // B5DG02 // B5DG01 // B5X841 // B5X840 // C0H7M9 // A0A1S3MSB2 // B5DGL2 // B5DGL6 // A0A1S3R084 // B5DGL8 // B5X369 // B5XDP1 // A0A1S3Q485 // A0A1S3PV74 // A0A1S3RSI8 // A0A1S3LIE9 // C0H761 // B5XCV1 // …
GO:0000502	CC	proteasome complex	17	672	2.52976	227	65384	0.34718	7.28661	4.2e-10	1.4e-08	// B5XG11 // B5RI28 // C0H856 // B5X6N3 // B5X386 // B9EMK0 // Q9DE54 // B9EPF1 // B5XGI9 // B5X7K7 // B5XCL4 // B5XAB2 // B5DG53 // C0H8V2 // B5DGU4 // B5DGU7 // B5DH24	// B5XG11 // B5XAV2 // B5X9V8 // B5XDF9 // Q9DE53 // B5X449 // B5X750 // Q9DE54 // B9EQJ4 // B5XBN2 // B5X5B1 // B5XG15 // A0A1S3KLM0 // C0PUI4 // A0A1S3NNN1 // A0A1S3NQV8 // B5XC13 // B5X916 // B5XAY5 // B5XA50 // Q9DD33 // A7KII5 // B5XBM2 // A7KII6 // B5XFW6 // A0A1S3RE36 // A0A1S3PYN0 // B5XGG8 // B5X768 // A0A1S3RCJ2 // B5XG29 // B5X8Y8 // A0A1S3Q6J9 // B5X8N6 // B5X5K2 // B5DGU9 // B5DGU8 /…
GO:0031988	CC	membrane-bounded vesicle	16	672	2.38095	508	65384	0.776948	3.06449	0.00011	0.0018	// B5DGE8 // B5X473 // B5DH02 // B9EMS3 // C0HAL2 // B5X3E3 // B8YQA0 // B5X2H8 // B5XAA0 // B5X3Q1 // B5X5I1 // B5X2M8 // B5X186 // B5DGD5 // B5X397 // B5XAE0	// O93460 // A0A1S3RD27 // A0A1S3PEC8 // A0A1S3RNG4 // A0A1S3RG86 // B8YQA0 // A0A1S3KMG3 // A0A1S3RT65 // B5X7S6 // B5X127 // A0A1S3SZW0 // A0A1S3MNF6 // A0A1S3LZL1 // A0A1S3NSF3 // A0A1S3NSF1 // B5X361 // B5X5K5 // A0A1S3N9U2 // A0A1S3SWV3 // B5X208 // A0A1S3NEW7 // A0A1S3M9M5 // A0A1S3QKQ9 // A0A1S3REP0 // A0A1S3RGX4 // A0A1S3Q1K1 // A0A1S3M8G6 // A0A1S3Q4E7 // A0A1S3RLW5 // A0A1S3NST1 // A0A1…
GO:0005874	CC	microtubule	16	672	2.38095	514	65384	0.786125	3.02872	0.00013	0.0019	// B5XFE9 // C0PU76 // A7KJD9 // C0H9W6 // B5DGE8 // B9EN30 // C0H808 // Q2ERI0 // B5DH01 // B5DH02 // B9EMD3 // C0HBJ2 // B5X0U5 // C0H9T2 // B5X3H7 // C0HBL4	// A0A1S3NL57 // A0A1S3P0J6 // O93460 // A0A1S3STF6 // A0A1S3R5W2 // A0A1S3Q6H7 // A0A1S3PLW1 // A0A1S3R717 // A0A1S3PD57 // B5X592 // A0A1S3QAD9 // A0A1S3Q505 // A0A1S3Q9E4 // A0A1S3R6V2 // A0A1S3LVB5 // A0A1S3LXS2 // A0A1S3M0R3 // A0A1S3LXS6 // A0A1S3KW65 // A0A1S3LWS9 // A0A1S3Q9K8 // A0A1S3NZ90 // A0A1S3PTI0 // B5XFE9 // A0A1S3NZH7 // A0A1S3NZH6 // A0A1S3NZH3 // A0A1S3LIE8 // A0A1S3QHY9 // A0…
GO:0031982	CC	vesicle	16	672	2.38095	524	65384	0.801419	2.97092	0.00016	0.0022	// B5DGE8 // B5X473 // B5DH02 // B9EMS3 // C0HAL2 // B5X3E3 // B8YQA0 // B5X2H8 // B5XAA0 // B5X3Q1 // B5X5I1 // B5X2M8 // B5X186 // B5DGD5 // B5X397 // B5XAE0	// O93460 // A0A1S3RD27 // A0A1S3PEC8 // A0A1S3RNG4 // A0A1S3RG86 // B8YQA0 // A0A1S3KMG3 // A0A1S3QC32 // A0A1S3RT65 // B5X7S6 // B5X127 // A0A1S3SZW0 // A0A1S3MNF6 // A0A1S3LZL1 // A0A1S3NSF3 // A0A1S3NSF1 // B5X361 // B5X5K5 // A0A1S3N9U2 // A0A1S3SWV3 // B5X208 // A0A1S3NEW7 // A0A1S3M9M5 // A0A1S3QKQ9 // A0A1S3REP0 // A0A1S3RGX4 // A0A1S3Q1K1 // A0A1S3M8G6 // A0A1S3Q4E7 // A0A1S3RLW5 // A0A1…
GO:0005829	CC	cytosol	14	672	2.08333	335	65384	0.512358	4.06617	1.5e-05	0.00031	// B5DGL6 // B5X5W5 // C0H9L8 // A7KIL2 // B5XGR3 // B5XA06 // B5X4H4 // B5X1B5 // C7C1L7 // B5X2M8 // I0J1J2 // B5X3H5 // C0HBT3 // B5X7R3	// B5X9U7 // B5X5E4 // A0A1S3NBM8 // A0A1S3L4V4 // B5XDG0 // B5XAK7 // A0A1S3S419 // A0A1S3KNQ1 // A0A1S3S414 // A0A1S3S412 // A0A1S3MDM2 // A0A1S3RTX7 // A0A1S3RTX6 // A0A1S3ST11 // A0A1S3KR66 // A0A1S3NA10 // A0A1S3T062 // A0A1S3T039 // C0H744 // A0A1S3KPH9 // A0A1S3KNI3 // A0A1S3S5Q1 // A0A1S3S5Q6 // C0PU61 // A0A1S3MDE2 // A0A1S3R410 // A0A1S3KYC4 // B5XGF2 // A0A1S3R145 // A0A1S3KPH4 // A0A1…
GO:0033279	CC	ribosomal subunit	13	672	1.93452	108	65384	0.165178	11.7118	1.3e-10	4.7e-09	// B5DGV7 // B5DGL6 // B5DGV2 // B5X5W5 // B5DGX5 // A7KIL2 // B5X369 // B5DGK9 // B5X4H4 // B5DGY4 // B9EP20 // B5X7R3 // B5XEW6	// A0A1S3NNF0 // B5X5W5 // B5DGK9 // A0A1S3QQU7 // B5X9J1 // A0A1S3S2B2 // B5XC12 // B5X599 // B5X6U7 // A0A1S3L111 // A0A1S3T723 // B5X0Y8 // A0A1S3NFD4 // A0A1S3Q7X9 // C0H7K2 // B5XDA1 // B5X369 // B5X6T4 // A0A1S3SE09 // B5RIB5 // B5XBE5 // B5DGD4 // B9EP20 // B5XEW6 // Q9YGQ0 // E0R869 // B5X7M0 // B5DGV2 // B5X8X7 // A7KIL2 // A0A1S3RYR3 // M4V3H3 // B5X8A9 // C0H773 // C0H7C9 // A0A1S2X2U3…
GO:0070062	CC	extracellular vesicular exosome	11	672	1.6369	51	65384	0.0780007	20.9858	4.8e-12	2.2e-10	// B5DGE8 // B5X2M8 // B9EMS3 // C0HAL2 // B5X3E3 // B8YQA0 // B5DGD5 // B5DH02 // B5X3Q1 // B5X397 // B5XAE0	// B5XEF8 // B5X9F8 // B5X1S6 // B5X3E3 // B5X3E2 // B8YQA0 // B5X393 // B5X7W3 // C0HBN0 // B5X794 // B5X137 // B5DGE8 // C0HAI2 // B5X1Q9 // B5DG68 // B5X7S6 // B5X3Q1 // B5X431 // B5X4K4 // C0H7X9 // Q5K595 // B5X397 // B5XFY1 // B9EMS3 // B9EMH1 // B5X4C7 // C0H815 // B5XEI6 // Q9DDK2 // B5XCQ9 // B5X2X6 // B9ENP4 // B5X8S5 // B5XA62 // B5XGC1 // B5X127 // C0H8F9 // B9EN47 // B5X2M8 // B5X1I3…
GO:0043230	CC	extracellular organelle	11	672	1.6369	51	65384	0.0780007	20.9858	4.8e-12	2.2e-10	// B5DGE8 // B5X2M8 // B9EMS3 // C0HAL2 // B5X3E3 // B8YQA0 // B5DGD5 // B5DH02 // B5X3Q1 // B5X397 // B5XAE0	// B5XEF8 // B5X9F8 // B5X1S6 // B5X3E3 // B5X3E2 // B8YQA0 // B5X393 // B5X7W3 // C0HBN0 // B5X794 // B5X137 // B5DGE8 // C0HAI2 // B5X1Q9 // B5DG68 // B5X7S6 // B5X3Q1 // B5X431 // B5X4K4 // C0H7X9 // Q5K595 // B5X397 // B5XFY1 // B9EMS3 // B9EMH1 // B5X4C7 // C0H815 // B5XEI6 // Q9DDK2 // B5XCQ9 // B5X2X6 // B9ENP4 // B5X8S5 // B5XA62 // B5XGC1 // B5X127 // C0H8F9 // B9EN47 // B5X2M8 // B5X1I3…
GO:0065010	CC	extracellular membrane-bounded organelle	11	672	1.6369	51	65384	0.0780007	20.9858	4.8e-12	2.2e-10	// B5DGE8 // B5X2M8 // B9EMS3 // C0HAL2 // B5X3E3 // B8YQA0 // B5DGD5 // B5DH02 // B5X3Q1 // B5X397 // B5XAE0	// B5XEF8 // B5X9F8 // B5X1S6 // B5X3E3 // B5X3E2 // B8YQA0 // B5X393 // B5X7W3 // C0HBN0 // B5X794 // B5X137 // B5DGE8 // C0HAI2 // B5X1Q9 // B5DG68 // B5X7S6 // B5X3Q1 // B5X431 // B5X4K4 // C0H7X9 // Q5K595 // B5X397 // B5XFY1 // B9EMS3 // B9EMH1 // B5X4C7 // C0H815 // B5XEI6 // Q9DDK2 // B5XCQ9 // B5X2X6 // B9ENP4 // B5X8S5 // B5XA62 // B5XGC1 // B5X127 // C0H8F9 // B9EN47 // B5X2M8 // B5X1I3…
GO:0044445	CC	cytosolic part	10	672	1.4881	142	65384	0.217179	6.85195	2.7e-06	6.1e-05	// B5DGL6 // B5X5W5 // A7KIL2 // B5X1B5 // B5XA06 // B5X4H4 // B5X2M8 // I0J1J2 // B5X3H5 // B5X7R3	// A0A1S3NBM8 // A0A1S3L4V4 // A0A1S3S419 // A0A1S3QPN8 // A0A1S3S414 // A0A1S3S412 // A0A1S3S1F2 // A0A1S3NA10 // A0A1S3R410 // B5XGF2 // A0A1S3L4F3 // A0A1S3R7V9 // B9EPE9 // C0PU61 // A0A1S3R7V5 // A0A1S3RAY6 // A0A1S3NFD4 // B5X681 // A0A1S3Q086 // A0A1S3LYU9 // B5X6T6 // B5XE30 // B5X6T9 // B5X2M8 // B5X7T9 // B5X9Z0 // B5DGD4 // A0A1S3MHB8 // A0A1S3R7W5 // B5X6E3 // A0A1S3RAZ1 // A0A1S3QR92…
GO:0005839	CC	proteasome core complex	8	672	1.19048	121	65384	0.185061	6.4329	4.2e-05	0.00073	// B5XG11 // C0H856 // B5X6N3 // Q9DE54 // B5XGI9 // B5XCL4 // B5DG53 // B5DGU4	// B5XG11 // B5XAV2 // Q9DE53 // B5X750 // Q9DE54 // B5X5B1 // B5XG15 // A0A1S3KLM0 // A0A1S3KLM6 // A0A1S3NQV8 // B5XA59 // B5X916 // B5XAY5 // B5XA50 // Q9DD33 // A7KII5 // B5XGN5 // A7KII6 // B5XFW6 // A0A1S3PYN0 // B5XGG8 // B5X768 // B5XG29 // B5X8Y8 // B5X8N6 // B5DGU3 // B5DGU5 // B9EM89 // B9EML1 // B5X6T8 // B5XFE8 // B5RI58 // B5XCG8 // B9EM13 // B5XFB6 // B5XAG6 // B9EM90 // B5X619 // …
GO:0015935	CC	small ribosomal subunit	7	672	1.04167	54	65384	0.082589	12.6127	1.5e-06	3.7e-05	// B5DGL6 // B5DGY4 // B5DGX5 // A7KIL2 // B5DGK9 // B9EP20 // B5XEW6	// Q9YGQ0 // E0R869 // B5X8X7 // B5DGX5 // A7KIL2 // B5X2G7 // B5DGK9 // Q9DF27 // B5X9L6 // A0A1S3LP02 // B5DGL6 // C0H7T0 // A0A1S3RYR3 // A0A1S3QWC9 // A0A1S3S2B2 // A0A1S3RFY3 // A0A1S3LW35 // A0A1S3QU58 // B5DGA8 // B5X8A9 // B5XGL6 // C0H773 // A0A1S2X2U3 // E0R838 // A0A1S3M391 // B5DGX4 // B5X0Y8 // A0A1S3S9W5 // A0A1S3L111 // A0A1S3Q7X9 // C0H7I9 // C0H7K2 // B5DGY5 // B5DGY4 // B5DGY6 /…
GO:0015934	CC	large ribosomal subunit	6	672	0.892857	54	65384	0.082589	10.8108	2e-05	0.00039	// B5DGV7 // B5DGV2 // B5X5W5 // B5X369 // B5X4H4 // B5X7R3	// A0A1S3PQI7 // B5DGV7 // B5X7M0 // B5DGV2 // A0A1S3NNF0 // B5X5W5 // A0A1S3LR35 // B5RIB5 // A0A1S3QQU7 // B5XAJ8 // B5X9J1 // B5DGV1 // B5DGW6 // M4V3H3 // B5XC12 // P24558 // B5XA79 // B5X4J9 // B5X599 // B5X6U7 // A0A1S3QVZ2 // C0H7C9 // A0A1S3T723 // C0H7C7 // B5XDG0 // A0A1S3NFD4 // B5XBQ2 // B5DGW7 // C0H8H2 // B5DGW4 // C0H8L1 // B5XDA1 // B5XEA3 // B5X369 // B5X6T4 // A0A1S3N8J1 // B5XA…
GO:0016469	CC	proton-transporting two-sector ATPase complex	6	672	0.892857	123	65384	0.188119	4.74623	0.0018	0.022	// B5DG78 // C0H9X1 // B5RI36 // B5XAD3 // B5X195 // B5X8U4	// B5X3C7 // A0A1S3NMN9 // B5XGG0 // B5X161 // A0A1S3S5I6 // A0A1S3S5I4 // B5XDF0 // B5DGH4 // B5DGC9 // A0A1S3L1F9 // C0H715 // B5X626 // M4VHK7 // W0LQS8 // B5X6L8 // E2JDJ1 // A0A1S3MIY7 // B5XEN1 // A0A1S3LKI9 // A0A1S3MHS7 // A0A1S3RSI3 // A0A1S3PEP5 // B5DH26 // B5X195 // A0A1S3KYH8 // A0A1S3PWT1 // A0A1S3QJ64 // B5X6K1 // C0H9X1 // B5X6S0 // B5X1Y1 // B5X274 // A0A1S3RMR2 // B5XAD3 // Q359…
GO:0022626	CC	cytosolic ribosome	5	672	0.744048	21	65384	0.0321179	23.1661	2.1e-06	5e-05	// A7KIL2 // B5X5W5 // B5DGL6 // B5X4H4 // B5X7R3	// B5XDG0 // C0H7F3 // E0R869 // A0A1S3L5Q9 // B5DGB6 // B5DGW4 // A0A1S3S3V9 // B5X5W5 // P24558 // A7KIL2 // B5X4J9 // B5DGD4 // Q9DF27 // A0A1S3QVZ2 // C0H7L6 // A0A1S3NFD4 // B5X4H4 // A0A1S2X2U3 // A0A1S3SG61 // B5DGL6 // B5X7R3
GO:0022624	CC	proteasome accessory complex	5	672	0.744048	36	65384	0.0550593	13.5136	3.4e-05	0.00062	// B5XAB2 // B9EMK0 // C0H8V2 // B9EPF1 // B5DH24	// B5X8M1 // A0A1S3QZ04 // B9EPW1 // B9EQ84 // B5XE01 // B5XE06 // B9ELZ3 // B9EMK0 // C0H8V2 // B9ELT0 // B9ENH7 // B9ENB6 // B9EP79 // B9ENB1 // B5X8E2 // A0A1S3T1T4 // A0A1S3MPT7 // B5XAB2 // A0A1S3T355 // A0A1S3SAT7 // A0A1S3R8Z1 // A0A1S3NEZ9 // A0A1S3Q9A3 // A0A1S3MQ75 // B9EML6 // A0A1S3T3T5 // B9EQJ4 // A0A1S3NES1 // B5RI16 // B9EPF1 // B5X722 // B5X6E1 // A0A1S3S4T0 // B9EN67 // B5DH25 /…
GO:0019773	CC	proteasome core complex, alpha-subunit complex	5	672	0.744048	58	65384	0.0887067	8.38773	0.00034	0.0044	// B5XGI9 // B5DG53 // B5X6N3 // B5XCL4 // B5DGU4	// B5XDD4 // B5X9Q8 // B5XAV2 // B5X6R7 // B5X9F8 // B5XF14 // B5X5D8 // B5X750 // B9EP88 // B5X8P5 // B5XFD5 // A0A1S3KLI2 // B5XCL4 // B5XFB6 // W5S0I8 // B5XG15 // B9ELT4 // A0A1S3KLM0 // A0A1S3KLM6 // A0A1S3SQI0 // B5X8K7 // B5XC96 // A0A1S3NQV8 // B5XA59 // B5XAL3 // B5X959 // B5XA50 // A0A1S3LHY7 // B5XEP4 // A0A1S3QUR8 // B9EM89 // B5DGU6 // B5X619 // B5X768 // A0A1S3QSS0 // B5DGU3 // B5XG…
GO:0045259	CC	proton-transporting ATP synthase complex	5	672	0.744048	59	65384	0.0902361	8.24556	0.00037	0.0046	// B5RI36 // B5XAD3 // B5X8U4 // B5X195 // B5DG78	// B5DG78 // B5XBT8 // B5X9Q3 // C0H702 // B5XGG0 // B5XDF0 // B5X4S6 // B5XGB9 // B5XF93 // B5X5F2 // M4UZU2 // B5XB94 // B9ENJ3 // A0A1S3PEL4 // B5XA73 // B5X6L8 // B5XCB0 // A0A1S3QUP6 // C0H715 // B5XAD3 // B5XAI5 // Q35920 // B5X626 // M4VHK7 // B5X9A5 // W0LQS8 // B5XB87 // B5X5E2 // A0A1S3LGZ3 // B5XCS5 // B5DGN1 // E2JDJ1 // B5DGN3 // B5DGN2 // B5RI36 // B5X9X1 // B5X6S0 // B5DGF3 // A0A1…
GO:0003824	MF	catalytic activity	259	672	38.5417	17965	65384	27.4761	1.40273	3.4e-06	0.00035	// B5XG11 // C0HAR9 // B5DH01 // T2L2I0 // B5X115 // B5X1C1 // B5X291 // B9EPJ9 // B8YQA0 // Q9DE54 // C0HAZ1 // C0HA69 // C0HBH7 // B5X9J3 // C0PU99 // B5X4F4 // C0HAA0 // B5XD07 // B5XE29 // C0HBD9 // B9EMD6 // B5DGC6 // C0H904 // B5XGF6 // B5DG81 // B5X1S8 // K8DW80 // B5X3C6 // C0HBM6 // A7KII8 // B5X1S3 // B5X6P4 // B5X3J5 // B9EN30 // A0A0G3B776 // C0PU96 // B5X3Q3 // B5X6L9 // C0PU76 // B5…	// A0A1S3QDX4 // A0A1S3NPT8 // A0A1S3R0H5 // A0A1S3QDX0 // A0A1S3QG23 // A0A1S3PLW1 // A0A1S3S8M7 // A0A1S3L5T3 // A0A1S3S8M2 // A0A1S3L4V2 // A0A1S3RBU6 // C0HBF0 // A0A1S3KXH0 // A0A1S3RBU0 // A0A1S3RBU8 // A0A1S3LVB9 // A0A1S3KRM2 // B9EME1 // B5X6F5 // A0A1S3N7P9 // A0A1S3LQ90 // A0A1S3LQ97 // A0A1S3LQ95 // A0A1S3S3L3 // A0A1S3SSK6 // A0A1S3LM38 // A0A1S3PRU0 // A0A1S3QL55 // A0A1S3QNW3 // A0…
GO:0000166	MF	nucleotide binding	131	672	19.494	7893	65384	12.0718	1.61485	1.1e-06	0.00013	// T2L2I0 // C0HAZ1 // Q78BU2 // B9ELV2 // C0HAA0 // B5XD07 // B5X4F0 // C0HBD9 // C0HBF1 // B5DGC6 // B5XG92 // C0H9E7 // A7KII8 // B5X397 // B5X6L9 // C0PU76 // C7C1L7 // C0HA77 // C0HAB6 // B5XFE9 // B5X2M8 // B5X3K2 // B5X2M3 // B5X316 // C0H945 // B5X195 // B5RI28 // C0HAC7 // B5DGM5 // B5X3E4 // C0H9X1 // C0H9P1 // B5X1Y0 // B5XET4 // B5DGE8 // B5X6D9 // B5X3U9 // B3TDC3 // C0HA85 // B5X280…	// A0A1S3QDX7 // A0A1S3QDX5 // A0A1S3QG27 // A0A1S3PLW4 // A0A1S3PLW1 // A0A1S3S8M8 // A0A1S3S8M7 // A0A1S3NIH9 // A0A1S3L4V2 // A0A1S3RBU6 // C0HBF1 // A0A1S3RQS2 // A0A1S3L0F8 // A0A1S3LVB9 // A0A1S3LVB0 // A0A1S3LVB5 // A0A1S3PRU8 // A0A1S3LM35 // A0A1S3KJB3 // B5X209 // A0A1S3KJB8 // A0A1S3RDG0 // A0A1S3NK54 // A0A1S3PTI2 // A0A1S3NK51 // A0A1S3MTH8 // A0A1S3RKC8 // A0A1S3M8G5 // A0A1S3S186 /…
GO:0017076	MF	purine nucleotide binding	121	672	18.006	7599	65384	11.6221	1.54928	1.3e-05	0.0007	// T2L2I0 // C0HAZ1 // Q78BU2 // B9ELV2 // C0HAA0 // B5XD07 // B5X4F0 // C0HBD9 // C0HBF1 // B5DGC6 // B5XG92 // A7KII8 // B5X397 // B5X6L9 // C0PU76 // C7C1L7 // C0HAB6 // B5XFE9 // B5X2M8 // B5X2M3 // B5X316 // C0H945 // B5X195 // B5RI28 // C0HAC7 // B5DGM5 // B5X3E4 // C0H9X1 // C0H9P1 // B5X1Y0 // B5DGE8 // B5X6D9 // B5X3U9 // B3TDC3 // C0HA85 // B5X280 // B5X3U6 // B9EMS3 // Q9DDK6 // C0H9H2…	// A0A1S3QDX7 // A0A1S3QDX5 // A0A1S3QG27 // A0A1S3PLW4 // A0A1S3PLW1 // A0A1S3S8M8 // A0A1S3S8M7 // A0A1S3NIH9 // A0A1S3L4V2 // A0A1S3RBU6 // C0HBF1 // A0A1S3RQS2 // A0A1S3L0F8 // A0A1S3LVB9 // A0A1S3LVB0 // A0A1S3LVB5 // A0A1S3PRU8 // A0A1S3LM35 // A0A1S3KJB3 // B5X209 // A0A1S3KJB8 // A0A1S3RDG0 // A0A1S3NK54 // A0A1S3PTI2 // A0A1S3NK51 // A0A1S3MTH8 // A0A1S3RKC8 // A0A1S3M8G5 // A0A1S3S186 /…
GO:0032555	MF	purine ribonucleotide binding	118	672	17.5595	7485	65384	11.4478	1.53388	2.4e-05	0.00088	// T2L2I0 // C0HAZ1 // Q78BU2 // B9ELV2 // C0HAA0 // B5XD07 // B5X4F0 // C0HBD9 // C0HBF1 // B5DGC6 // A7KII8 // B5X397 // B5X6L9 // C0PU76 // C7C1L7 // C0HAB6 // B5XFE9 // B5X2M8 // B5X2M3 // B5X316 // C0H945 // B5X195 // B5RI28 // C0HAC7 // B5DGM5 // B5X3E4 // C0H9X1 // C0H9P1 // B5X1Y0 // B5DGE8 // B5X6D9 // B3TDC3 // C0HA85 // B5X280 // B5X3U6 // B9EMS3 // Q9DDK6 // C0H9H2 // B5X5P1 // C0HAL2…	// A0A1S3QDX7 // A0A1S3QDX5 // A0A1S3QG27 // A0A1S3PLW4 // A0A1S3PLW1 // A0A1S3S8M8 // A0A1S3S8M7 // A0A1S3NIH9 // A0A1S3L4V2 // A0A1S3RBU6 // C0HBF1 // A0A1S3RQS2 // A0A1S3L0F8 // A0A1S3LVB9 // A0A1S3LVB0 // A0A1S3LVB5 // A0A1S3PRU8 // A0A1S3LM35 // A0A1S3KJB3 // B5X209 // A0A1S3KJB8 // A0A1S3RDG0 // A0A1S3NK54 // A0A1S3PTI2 // A0A1S3NK51 // A0A1S3MTH8 // A0A1S3RKC8 // A0A1S3M8G5 // A0A1S3S186 /…
GO:0032553	MF	ribonucleotide binding	118	672	17.5595	7485	65384	11.4478	1.53388	2.4e-05	0.00088	// T2L2I0 // C0HAZ1 // Q78BU2 // B9ELV2 // C0HAA0 // B5XD07 // B5X4F0 // C0HBD9 // C0HBF1 // B5DGC6 // A7KII8 // B5X397 // B5X6L9 // C0PU76 // C7C1L7 // C0HAB6 // B5XFE9 // B5X2M8 // B5X2M3 // B5X316 // C0H945 // B5X195 // B5RI28 // C0HAC7 // B5DGM5 // B5X3E4 // C0H9X1 // C0H9P1 // B5X1Y0 // B5DGE8 // B5X6D9 // B3TDC3 // C0HA85 // B5X280 // B5X3U6 // B9EMS3 // Q9DDK6 // C0H9H2 // B5X5P1 // C0HAL2…	// A0A1S3QDX7 // A0A1S3QDX5 // A0A1S3QG27 // A0A1S3PLW4 // A0A1S3PLW1 // A0A1S3S8M8 // A0A1S3S8M7 // A0A1S3NIH9 // A0A1S3L4V2 // A0A1S3RBU6 // C0HBF1 // A0A1S3RQS2 // A0A1S3L0F8 // A0A1S3LVB9 // A0A1S3LVB0 // A0A1S3LVB5 // A0A1S3PRU8 // A0A1S3LM35 // A0A1S3KJB3 // B5X209 // A0A1S3KJB8 // A0A1S3RDG0 // A0A1S3NK54 // A0A1S3PTI2 // A0A1S3NK51 // A0A1S3MTH8 // A0A1S3RKC8 // A0A1S3M8G5 // A0A1S3S186 /…
GO:0005198	MF	structural molecule activity	60	672	8.92857	1261	65384	1.92861	4.62955	4.4e-21	1.6e-18	// B5DGK7 // C0H7H1 // B9ELK0 // A7KJD9 // B5DGV2 // B5DGV3 // B5DGX5 // A7KIL2 // B5DGX3 // B5X8X3 // B5DGX1 // B5DGV7 // C0HBL4 // B5X0U5 // B9ENQ3 // B5DGE8 // B5XGB0 // B5X5W5 // B5X5S8 // B5XG87 // C0H7M1 // B5X3Q6 // B5DG02 // B9EN30 // B5X5I1 // C0H808 // B5X3H7 // B5XCK4 // C0H7C6 // B5X4H4 // B5DGW2 // B5DGL6 // B5X668 // C0PU76 // B5XBW2 // B5DGY4 // B9ENX2 // B5DGW8 // B5X369 // B5XDA7…	// A0A1S3Q572 // B9EPU0 // A0A1S3Q571 // B9EQB9 // A0A1S3P0J6 // A0A1S3QBC6 // A0A1S3KYT1 // A0A1S3R0V4 // A0A1S3QG25 // A0A1S3N6S7 // A0A1S3RNG1 // C0H753 // A0A1S3QUF1 // A0A1S3S654 // A0A1S3LME8 // A0A1S3M1W6 // B5XC98 // B5RI65 // B5X9J1 // B5X7S7 // A0A1S3QV45 // B5RI62 // A0A1S3Q577 // A0A1S3R4F9 // C0H8C7 // A0A1S3RQS8 // A0A1S3RLP3 // A0A1S3QYA2 // A0A1S3MWG7 // B9EQ57 // B5X599 // B5X7D0…
GO:0016491	MF	oxidoreductase activity	50	672	7.44048	1815	65384	2.77591	2.68038	2.3e-09	3.3e-07	// C0HAR9 // B5X9Q1 // B8YQA0 // B5X3E6 // C0H9T9 // B5X9L4 // B5X215 // C0H8W3 // B5X9J3 // B5X0U9 // B5X3U9 // B5DGA3 // B5X3L5 // B5X5Q6 // B5DGS2 // C0HB51 // C0H9E7 // C0H9H3 // B5XFJ9 // C0H868 // B5X2W8 // K8DW80 // C0H935 // Q7ZZK9 // Q7ZZK8 // B5X3J5 // C0H820 // A0A0G3B776 // B5XDC2 // B5XAU6 // C0H9N6 // B5X9C6 // C0HA51 // B5XAK2 // B5X4R5 // B5X8H5 // B5XAK8 // Q7ZZL0 // B5XAM9 // B5…	// B5X447 // B5XF85 // B5X119 // A0A1S3QL55 // B5X9J3 // A0A1S3LME1 // A0A1S3N5L8 // A0A1S3QCH2 // A0A1S3LVB7 // A0A1S3R081 // A0A1S3P5E2 // A0A1S3KJB2 // A0A1S3PBL0 // A0A1S3RR12 // A0A1S3M109 // A0A1S3T3E6 // A1X3Q8 // A1X3Q9 // A1X3Q1 // A1X3Q2 // A1X3Q3 // A1X3Q4 // A1X3Q7 // A0A1S3LYC5 // A0A1S3R9B0 // A0A1S3LN29 // A0A1S3L9T0 // A0A1S3KR39 // A0A1S3LAF4 // A0A1S3QDJ6 // A0A1S3S7L8 // A0A1S3…
GO:0003735	MF	structural constituent of ribosome	43	672	6.39881	486	65384	0.743301	8.60864	9.1e-26	6.6e-23	// B5DGK7 // C0H7H1 // B9ELK0 // B5DGV2 // B5DGV3 // B5DGX5 // A7KIL2 // B5DGX3 // B5X8X3 // B5DGX1 // B5DGV7 // B5XGB0 // B5X5W5 // B5X5S8 // C0H7M1 // B5X3Q6 // B5DG02 // C0H7C6 // B5DGW2 // B5DGL6 // B5X668 // B5XBW2 // B5DGY4 // B9ENX2 // B5DGW8 // B5X369 // B5XDA7 // B5X6R2 // B5DGK9 // B5DGJ6 // B5X7R3 // B9ELY8 // B5DGB4 // B5XAX9 // B5X6X8 // B5XG87 // B5XCK4 // C0H7L0 // B5X4H4 // B5RI93…	// B9EPU0 // B9EQB9 // C0H7J7 // A0A1S3N6S7 // B5XC98 // B5RI65 // B5X9J1 // B5X7S7 // B5RI62 // C0H8C7 // B9EQ57 // B5X599 // B5X7J4 // C0H7M1 // C0H7M0 // B5DG02 // B5DG01 // B5X841 // B5X840 // C0H7M9 // A0A1S3MSB2 // B5DGL2 // B5DGL6 // A0A1S3R084 // B5DGL8 // B5X369 // A0A1S3RYQ8 // A0A1S3Q485 // A0A1S3PV74 // A0A1S3RSI8 // A0A1S3LIE9 // B5XCV1 // B9EP20 // B5DH21 // B5DH20 // B5X9S4 // B5XF…
GO:0003723	MF	RNA binding	42	672	6.25	2413	65384	3.69051	1.69354	0.0012	0.026	// C0HAZ6 // B5DGV2 // B5X4Y5 // A7KIL2 // B5DGK9 // B5X232 // B5X4U8 // Q6ZZX5 // C0PUV0 // B5X2K1 // B5XDR0 // B5XEI3 // B5X5W5 // B5X5S8 // B5X4Q4 // B5X4I2 // B9EMD6 // B5DG02 // B5DG42 // C0HAB7 // B5X1L5 // C0PUJ5 // C0H8N3 // B5DGY4 // B5XAK0 // B5RI78 // B5X326 // C0HA19 // C0PTY8 // C0H9H3 // B5X7R3 // B9EL39 // B5XGR8 // B5XB23 // B5XFP5 // B9ENF4 // B5X3Z4 // B5XA68 // B5X2V9 // C0H8X4…	// A0A1S3LUR5 // A0A1S3LK00 // A0A1S2X4J4 // A0A1S3NYQ1 // B5X448 // A0A1S3P6R5 // A0A1S3NYQ2 // A0A1S3LP47 // B9ELV7 // A0A1S3PRG6 // A0A1S3NTE2 // A0A1S3S5T6 // C0HBF7 // A0A1S3MZY9 // B9ENF4 // A0A1S3PC87 // A0A1S3KVL3 // A0A1S3S6J2 // B5X840 // A0A1S3R084 // A0A1S3NTK3 // A0A1S3KLR8 // A0A1S3QF11 // A0A1S3QPG8 // C0HB82 // A0A1S3M107 // A0A1S3LV04 // A0A1S3QKQ3 // A0A1S3RSI5 // A0A1S3LV08 // …
GO:0005525	MF	GTP binding	34	672	5.05952	1399	65384	2.13967	2.36463	8.8e-06	0.00064	// C0PU99 // B5X4B1 // A7KJD9 // B5X5P1 // C0HBR0 // B5XF97 // C0HBL4 // B5X0U5 // B9ELV2 // B5X4F0 // Q0H922 // B5DGE8 // B5X499 // C0H9C3 // B5X6D9 // C0HBD9 // B9EPC4 // B5X3Q1 // B9EN30 // C0H808 // B5X3H7 // B5X1L5 // B5X6L9 // C0PU76 // Q3YBN1 // B9ELU2 // B5XFE9 // C0HAL2 // Q2ERI0 // B5X2M3 // B5DH01 // B5DH02 // C0HAV8 // B5X2P2	// B5X445 // A0A1S3RCM3 // B5X110 // A0A1S3P0J6 // A0A1S2X4J4 // A0A1S3QG27 // A0A1S3MP07 // A0A1S3MP02 // A0A1S3LME8 // A0A1S3S8M8 // A0A1S3PA01 // B9ELV2 // B9ELV5 // A0A1S3L4V2 // A0A1S3SDN9 // B5X0Q2 // B5X0Q1 // A0A1S3LKQ5 // A0A1S3QCH6 // A0A1S3KJB3 // A0A1S3KJB8 // A0A1S3PPY1 // A0A1S3QTW7 // A0A1S3LAU2 // A0A1S3MYY2 // A0A1S3S186 // A0A1S3PVD9 // A0A1S3NS98 // A0A1S3LI97 // A0A1S3SSF6 // …
GO:0032561	MF	guanyl ribonucleotide binding	34	672	5.05952	1420	65384	2.17179	2.32966	1.2e-05	0.0007	// C0PU99 // B5X4B1 // A7KJD9 // B5X5P1 // C0HBR0 // B5XF97 // C0HBL4 // B5X0U5 // B9ELV2 // B5X4F0 // Q0H922 // B5DGE8 // B5X499 // C0H9C3 // B5X6D9 // C0HBD9 // B9EPC4 // B5X3Q1 // B9EN30 // C0H808 // B5X3H7 // B5X1L5 // B5X6L9 // C0PU76 // Q3YBN1 // B9ELU2 // B5XFE9 // C0HAL2 // Q2ERI0 // B5X2M3 // B5DH01 // B5DH02 // C0HAV8 // B5X2P2	// B5X445 // A0A1S3RCM3 // B5X110 // A0A1S3P0J6 // A0A1S2X4J4 // A0A1S3QG27 // A0A1S3MP07 // A0A1S3MP02 // A0A1S3LME8 // A0A1S3S8M8 // A0A1S3PA01 // B9ELV2 // B9ELV5 // A0A1S3L4V2 // A0A1S3SDN9 // B5X0Q2 // B5X0Q1 // A0A1S3LKQ5 // A0A1S3N3P8 // A0A1S3QCH6 // A0A1S3N1V1 // A0A1S3KJB3 // A0A1S3KJB8 // A0A1S3PPY1 // A0A1S3S973 // A0A1S3QTW7 // A0A1S3LAU2 // A0A1S3MYY2 // A0A1S3S186 // A0A1S3PVD9 // …
GO:0019001	MF	guanyl nucleotide binding	34	672	5.05952	1426	65384	2.18096	2.31986	1.3e-05	0.0007	// C0PU99 // B5X4B1 // A7KJD9 // B5X5P1 // C0HBR0 // B5XF97 // C0HBL4 // B5X0U5 // B9ELV2 // B5X4F0 // Q0H922 // B5DGE8 // B5X499 // C0H9C3 // B5X6D9 // C0HBD9 // B9EPC4 // B5X3Q1 // B9EN30 // C0H808 // B5X3H7 // B5X1L5 // B5X6L9 // C0PU76 // Q3YBN1 // B9ELU2 // B5XFE9 // C0HAL2 // Q2ERI0 // B5X2M3 // B5DH01 // B5DH02 // C0HAV8 // B5X2P2	// B5X445 // A0A1S3RCM3 // B5X110 // A0A1S3P0J6 // A0A1S2X4J4 // A0A1S3QG27 // A0A1S3MP07 // A0A1S3MP02 // A0A1S3LME8 // A0A1S3S8M8 // A0A1S3PA01 // B9ELV2 // B9ELV5 // A0A1S3L4V2 // A0A1S3SDN9 // B5X0Q2 // B5X0Q1 // A0A1S3LKQ5 // A0A1S3N3P8 // A0A1S3QCH6 // A0A1S3N1V1 // A0A1S3KJB3 // A0A1S3KJB8 // A0A1S3PPY1 // A0A1S3S973 // A0A1S3QTW7 // A0A1S3LAU2 // A0A1S3MYY2 // A0A1S3S186 // A0A1S3PVD9 // …
GO:0008233	MF	peptidase activity	31	672	4.6131	1518	65384	2.32167	1.98697	0.00042	0.011	// C0HAC7 // B5X372 // Q9DE54 // B5XCL4 // B9EQH8 // B5DFV6 // C0HAB5 // C0HA85 // B5X4K2 // C0H9L3 // B5X1B9 // B5X6N3 // C0H8N9 // B5X8N0 // B5XCS3 // B5X4M3 // B5XG11 // B5X1B7 // B5XCM1 // C0HAY4 // B5X7R9 // C0H9F2 // B5DGU4 // C0H856 // B5X4T6 // C0HBI8 // C0H9D7 // B5X2K3 // B5XGI9 // B5DG53 // B9EP03	// A0A1S3QDX0 // A0A1S3NDY2 // A0A1S3SDN0 // A0A1S3N5L0 // A0A1S3PPW3 // A0A1S3NKG1 // A0A1S3MSB5 // A0A1S3LM38 // A0A1S3KJY8 // C0H9F6 // A0A1S3QF17 // C0HB88 // C0H9F2 // A0A1S3NU57 // A0A1S3N3F1 // A0A1S3M106 // A0A1S3M104 // A0A1S3S978 // A0A1S3R152 // A0A1S3L294 // C0HAC7 // A0A1S3NLL6 // A0A1S3N344 // A0A1S3M076 // A0A1S3LHY7 // A0A1S3PYW4 // A0A1S3R578 // B5X2B5 // A0A1S3MGU3 // A0A1S3QX38…
GO:0070011	MF	peptidase activity, acting on L-amino acid peptides	28	672	4.16667	1410	65384	2.15649	1.93215	0.0011	0.026	// B5XG11 // B5X372 // Q9DE54 // B5XCL4 // B9EQH8 // B5DFV6 // C0HAB5 // C0HA85 // B5X4K2 // C0H9L3 // B5X1B9 // B5X6N3 // C0H8N9 // B5X8N0 // B5XCS3 // B5X4M3 // B5X1B7 // B5X7R9 // C0H9F2 // B5DGU4 // C0H856 // B5X4T6 // C0HBI8 // C0H9D7 // B5X2K3 // B5XGI9 // B5DG53 // B9EP03	// A0A1S3NDY2 // A0A1S3N5L0 // A0A1S3PPW3 // A0A1S3NKG1 // A0A1S3MSB5 // A0A1S3LM38 // A0A1S3QF17 // C0HB88 // C0H9F2 // A0A1S3S7S0 // A0A1S3N3F1 // A0A1S3M106 // A0A1S3M104 // A0A1S3S978 // A0A1S3R152 // A0A1S3L294 // A0A1S3NLL6 // A0A1S3N344 // A0A1S3M076 // A0A1S3LHY7 // A0A1S3PYW4 // A0A1S3R578 // B5X2B5 // A0A1S3MGU3 // A0A1S3QX38 // A0A1S3PHK1 // A0A1S3MHE5 // A0A1S3NHZ5 // A0A1S3PNC4 // A0…
GO:0003924	MF	GTPase activity	25	672	3.72024	858	65384	1.31225	2.83501	6.6e-06	0.00053	// C0PU99 // A7KJD9 // B5X5P1 // C0HBR0 // C0HBL4 // B5X0U5 // B5X4F0 // Q0H922 // B5DGE8 // C0H9C3 // B5X6D9 // C0HBD9 // B9EPC4 // B9EN30 // C0H808 // B5X3H7 // B5X1L5 // B5X6L9 // C0PU76 // B9ELU2 // B5XFE9 // C0HAL2 // Q2ERI0 // B5DH01 // B5DH02	// B5X445 // A0A1S3Q3K8 // A0A1S3P0J6 // A0A1S3P572 // A0A1S3STF6 // A0A1S3NS98 // A0A1S3RR63 // A0A1S3M9I8 // B5XFB4 // A0A1S3Q0E6 // A0A1S3PE67 // A0A1S3PA01 // B5X4F0 // B5X1J7 // B9ENF2 // B5X0Q2 // A0A1S3PFE9 // B5X0Q1 // A0A1S3LKQ5 // A0A1S3RCD0 // A0A1S3RC26 // A0A1S3SX64 // A0A1S3RCD8 // A0A1S3SCL6 // A0A1S3NJT8 // A0A1S3M1E7 // A0A1S3NYY2 // A0A1S3LKA9 // A0A1S3KRE6 // A0A1S3P276 // A0A1…
GO:0008135	MF	translation factor activity, nucleic acid binding	16	672	2.38095	568	65384	0.868714	2.74078	0.00038	0.011	// B5RI37 // C0PUQ2 // B9EL07 // B5X8P4 // C0HAL2 // B5XF07 // C0H9C3 // B5XAS7 // B5X5X5 // C0HBD9 // B5RI94 // B9EPC4 // C0H8R1 // C0H7V4 // B5X0W4 // B5XFY9	// B9EPU2 // A0A1S3LCY7 // A0A1S3R5W7 // A0A1S3SEP1 // B5X6P0 // A0A1S3M2Z4 // B9ENF1 // B5XA53 // B9ENF7 // B5X9E6 // B5DG04 // A0A1S3PCC0 // B5X189 // A0A1S3MLQ7 // A0A1S3QWR5 // A0A1S3LQ97 // A0A1S3L5L4 // B9ENT5 // B9ENT0 // A0A1S3SB26 // A0A1S3LW68 // A0A1S3LHV3 // B5X201 // A0A1S3QS04 // A0A1S3NPU8 // B5X7T5 // B5XDQ8 // A0A1S3T1Q8 // A0A1S3SNN1 // A0A1S3KRL9 // A0A1S3SNN4 // B5X6J8 // A0A1…
GO:0051082	MF	unfolded protein binding	14	672	2.08333	140	65384	0.21412	9.72976	3.2e-10	7.8e-08	// B5DG64 // B9EMS3 // B5X2M8 // Q0KFS6 // B5RI17 // B5X4M2 // B5X3E4 // B5X1Z2 // Q9W6K6 // U5KQM7 // C0HA30 // C0PUU5 // C0HAF8 // C0HAB6	// A0A1S3NS46 // A0A1S3RRD2 // A0A1S3QPN8 // A0A1S3LG94 // A0A1S3MN98 // A0A1S3QKA6 // A0A1S3L7N1 // A0A1S3SWX8 // B9EPE9 // A0A1S3LHD8 // B5XBF7 // C0HBK7 // B5X685 // A0A1S3MP94 // B5X207 // A0A1S3T539 // A0A1S3LI86 // C0HAB6 // A0A1S3QID6 // B5X2M8 // B5X7T9 // B5X9Z0 // A0A1S3MHB8 // A0A1S3KQ60 // A0A1S3S1N7 // A0A1S3M181 // A0A1S3L4C5 // A0A1S3QB94 // A0A1S3KXV0 // A0A1S3QZZ7 // A0A1S3RTF3 /…
GO:0048037	MF	cofactor binding	14	672	2.08333	507	65384	0.775419	2.68672	0.001	0.024	// B5X3U9 // B5XG92 // B5X3K2 // B5X1C1 // B5XAU6 // C0HA17 // C0PUF3 // C0H9E7 // B5DGS2 // B5X1V6 // B5X1S8 // B5X0U9 // B5X249 // B5X1V9	// O93460 // A0A1S3MSE8 // A0A1S3SXI5 // A0A1S3NF93 // B5X1C1 // A0A1S3NW86 // B5X1C6 // A0A1S3R5W1 // B5XE25 // A0A1S3RU03 // A0A1S3MIZ7 // A0A1S3QYA4 // A0A1S3T1H9 // A0A1S3MQR5 // C0H948 // A0A1S3NJZ8 // A0A1S3RMI3 // A0A1S3SUT7 // A0A1S3QH30 // A0A1S3SUT0 // A0A1S3L993 // A0A1S3SB25 // A0A1S3NJT5 // A0A1S3LI09 // A0A1S3STI9 // A0A1S3QF15 // A0A1S3QF14 // A0A1S3N6J2 // B5X205 // A0A1S3RCR5 // …
GO:0016853	MF	isomerase activity	13	672	1.93452	345	65384	0.527652	3.66629	8.2e-05	0.0026	// D0QEL0 // B9EL76 // B5XDR0 // B9EPT4 // B5X291 // C0HBH7 // B5X1H7 // C0H9Z6 // C0PU58 // B5DG94 // B5RIB0 // B5X249 // B5X0R8	// A0A1S3M4J4 // A0A1S3QF86 // C0H9M4 // C0H7J1 // B5X291 // A0A1S3MSE7 // B5XAV8 // A0A1S3R491 // A0A1S3PLW1 // C0HBF0 // B5XGF1 // A0A1S3QPN7 // A0A1S3LVB0 // A0A1S3LVB5 // A0A1S3LPC7 // B5DGL3 // B5DGL5 // A0A1S3KLR8 // B5X8F5 // B5X200 // B5X5R4 // A0A1S3PV75 // A0A1S3MIQ1 // A0A1S3P6Y2 // B5XB51 // B5X4Y3 // A0A1S3PI79 // A0A1S3QLX7 // A0A1S3LGS6 // A0A1S3PM71 // B5XCH3 // A0A1S3NZC9 // B5RI…
GO:0005200	MF	structural constituent of cytoskeleton	12	672	1.78571	105	65384	0.16059	11.1197	1.2e-09	2.2e-07	// B5XFE9 // A7KJD9 // C0PU76 // B5DGE8 // C0H808 // Q2ERI0 // B5DH01 // B5DH02 // C0HBL4 // B5X0U5 // B5X3H7 // B9EN30	// A0A1S3LU97 // A0A1S3L0N8 // A0A1S3P0J6 // A0A1S3KYB2 // A0A1S3LME8 // B9EMM4 // A0A1S3SZ40 // A0A1S3REW2 // A0A1S3MB10 // A0A1S3PES9 // A0A1S3L112 // A0A1S3PES7 // C0PU76 // A0A1S3RJ34 // A0A1S3RJ33 // A0A1S3NQ56 // B5XFE9 // A0A1S3MAJ2 // A0A1S3KVT5 // A0A1S3RCE4 // A7KIJ4 // A0A1S3MQY2 // A0A1S3MHP9 // A0A1S3RJ29 // A0A1S3P0L0 // A0A1S3LAS3 // A0A1S3L0S3 // A0A1S3P0L9 // A0A1S3N4F3 // A0A1S3…
GO:0016829	MF	lyase activity	12	672	1.78571	383	65384	0.58577	3.04849	0.00078	0.02	// B5X4B1 // I0J1J3 // Q3YBN1 // C0HA17 // B5X1B5 // B5X1V6 // B5X348 // B5X130 // I0J1J2 // B5X3H5 // C0H9I1 // B5XE29	// A0A1S3NIT2 // A0A1S3RM23 // A0A1S3NUH7 // A0A1S3NW86 // B5X4F3 // A0A1S3R6Y8 // B5XE29 // A0A1S3PWI0 // A0A1S3T1H5 // A0A1S3PPW1 // A0A1S3NA62 // A0A1S3RNL9 // A0A1S3T436 // A0A1S3R7G1 // A0A1S3N6J2 // A0A1S3QF18 // B5X5R6 // A0A1S3R2A6 // A0A1S3LSK1 // A0A1S3LH32 // A0A1S3KRL1 // A0A1S3SZM5 // A0A1S3RBL7 // A0A1S3L295 // A0A1S3KY97 // C0H9X3 // A0A1S3NYB1 // A0A1S3NYB2 // A0A1S3NZZ4 // A0A1S3…
GO:0051536	MF	iron-sulfur cluster binding	9	672	1.33929	144	65384	0.220237	6.0811	2.2e-05	0.00088	// B5XEX1 // B5X4V1 // B5X348 // B5XFF3 // B5XDC2 // C0HA71 // B5X6P4 // C0HA77 // B5X3P9	// A0A1S3PIK5 // A0A1S3S0J5 // A0A1S3SIT3 // A0A1S3NB92 // A0A1S3PWJ2 // A0A1S3KLM5 // A0A1S3QT53 // A0A1S3L583 // A0A1S3N642 // A0A1S3MQR5 // B5XAY2 // A0A1S3QLV6 // B5X4B2 // A0A1S3QMV4 // B5XFF3 // B5X848 // B5X991 // A0A1S3L7N8 // A0A1S3NXU8 // A0A1S3KKX2 // B5XEV5 // A0A1S3M7V4 // A0A1S3PKP3 // A0A1S3P469 // A0A1S3MMH4 // A0A1S3NBL4 // B5X5K3 // C0HA71 // C0HA77 // A0A1S3PJ07 // B5XCG9 // B5…
GO:0003746	MF	translation elongation factor activity	9	672	1.33929	144	65384	0.220237	6.0811	2.2e-05	0.00088	// B5RI37 // B9EL07 // C0HAL2 // C0H9C3 // C0HBD9 // B5X8P4 // B9EPC4 // C0H7V4 // B5XFY9	// A0A1S3PHF9 // A0A1S3PWA0 // C0PTZ4 // B9EL07 // B9EMV4 // A0A1S3QRF1 // B5XA53 // A0A1S3PAU2 // B5X9E6 // B9EMD4 // B5X996 // A0A1S3MLQ7 // A0A1S3KWH4 // A0A1S3Q8C1 // A0A1S3RGG1 // A0A1S3NTM5 // A0A1S3M0R0 // B9ENT5 // B5X9R1 // B9ENT0 // A0A1S3T5F4 // B5X6L3 // C0H9N2 // A0A1S3P4S9 // A0A1S3M0P6 // B5X6T0 // A0A1S3PCH6 // A0A1S3KXI6 // B5X201 // B5X727 // A0A1S3KWP4 // B9ELG6 // A0A1S3P605 /…
GO:0051540	MF	metal cluster binding	9	672	1.33929	144	65384	0.220237	6.0811	2.2e-05	0.00088	// B5XEX1 // B5X4V1 // B5X348 // B5XFF3 // B5XDC2 // C0HA71 // B5X6P4 // C0HA77 // B5X3P9	// A0A1S3PIK5 // A0A1S3S0J5 // A0A1S3SIT3 // A0A1S3NB92 // A0A1S3PWJ2 // A0A1S3KLM5 // A0A1S3QT53 // A0A1S3L583 // A0A1S3N642 // A0A1S3MQR5 // B5XAY2 // A0A1S3QLV6 // B5X4B2 // A0A1S3QMV4 // B5XFF3 // B5X848 // B5X991 // A0A1S3L7N8 // A0A1S3NXU8 // A0A1S3KKX2 // B5XEV5 // A0A1S3M7V4 // A0A1S3PKP3 // A0A1S3P469 // A0A1S3MMH4 // A0A1S3NBL4 // B5X5K3 // C0HA71 // C0HA77 // A0A1S3PJ07 // B5XCG9 // B5…
GO:0019842	MF	vitamin binding	9	672	1.33929	221	65384	0.338003	3.96235	0.00056	0.014	// B5X1C1 // C0H9N6 // C0PUF3 // C0H8M3 // B5X1V6 // B5X1S8 // C0H9T9 // C0H913 // C0HA17	// A0A1S3M1F1 // A0A1S3QDX4 // A0A1S3P8B8 // A0A1S3MEJ7 // A0A1S3LYM8 // B5X1C1 // A0A1S3MI06 // B5XB44 // A0A1S3PSZ8 // B5X3C2 // A0A1S3NW86 // A0A1S3QDQ0 // A0A1S3R5W1 // A0A1S3N2V5 // A0A1S3MIZ7 // A0A1S3SS35 // A0A1S3NJJ4 // B5X919 // B5X2N7 // A0A1S3SDY0 // A0A1S3RCP1 // A0A1S3NJZ8 // A0A1S3PGZ9 // A0A1S3LF74 // A0A1S3P6Z6 // A0A1S3LMM7 // A0A1S3LF73 // A0A1S3QH30 // C0PU65 // A0A1S3QNL9 // …
GO:0005544	MF	calcium-dependent phospholipid binding	8	672	1.19048	100	65384	0.152943	7.78381	1e-05	0.00069	// B5XCU8 // B5X1G1 // B5X865 // B5RI22 // B5X1W5 // B5X999 // B5XCE7 // B5XAE0	// A0A1S3PUV4 // A0A1S3PH49 // A0A1S3N085 // A0A1S3PW64 // A0A1S3LPK1 // A0A1S3M8N6 // A0A1S3MM94 // A0A1S3RSS7 // A0A1S3M7G8 // B5X999 // A0A1S3N0R6 // A0A1S3PUW0 // A0A1S3PZE0 // A0A1S3PDX9 // B5XBM7 // B5X1X1 // A0A1S3MMA0 // A0A1S3NM97 // A0A1S3KQ66 // A0A1S3Q9B1 // A0A1S3ML75 // A0A1S3QIJ7 // A0A1S3T2N8 // A0A1S3L6C5 // B5X865 // A0A1S3LLN0 // A0A1S3PZL4 // A0A1S3QHR9 // A0A1S3P1K3 // A0A1S3…
GO:0004298	MF	threonine-type endopeptidase activity	8	672	1.19048	113	65384	0.172825	6.88833	2.5e-05	0.00088	// B5XG11 // C0H856 // B5X6N3 // Q9DE54 // B5XGI9 // B5XCL4 // B5DG53 // B5DGU4	// B5XG11 // B5XAV2 // Q9DE53 // Q9DE54 // B5X5B1 // B5XG15 // A0A1S3KLM0 // A0A1S3KLM6 // A0A1S3NQV8 // B5XA59 // B5X916 // B5XAY5 // B5XA50 // Q9DD33 // A7KII5 // B5XGN5 // A7KII6 // B5XFW6 // B5XGG8 // B5X768 // B5XG29 // B5X8Y8 // B5X8N6 // B5DGU3 // B5DGU5 // B9EM89 // B9EML1 // B5X6T8 // B5XFE8 // B5RI58 // B5XCG8 // B9EM13 // B5XFB6 // B5XAG6 // B9EM90 // B5X619 // A0A1S3M187 // A0A1S3QXH3…
GO:0070003	MF	threonine-type peptidase activity	8	672	1.19048	113	65384	0.172825	6.88833	2.5e-05	0.00088	// B5XG11 // C0H856 // B5X6N3 // Q9DE54 // B5XGI9 // B5XCL4 // B5DG53 // B5DGU4	// B5XG11 // B5XAV2 // Q9DE53 // Q9DE54 // B5X5B1 // B5XG15 // A0A1S3KLM0 // A0A1S3KLM6 // A0A1S3NQV8 // B5XA59 // B5X916 // B5XAY5 // B5XA50 // Q9DD33 // A7KII5 // B5XGN5 // A7KII6 // B5XFW6 // B5XGG8 // B5X768 // B5XG29 // B5X8Y8 // B5X8N6 // B5DGU3 // B5DGU5 // B9EM89 // B9EML1 // B5X6T8 // B5XFE8 // B5RI58 // B5XCG8 // B9EM13 // B5XFB6 // B5XAG6 // B9EM90 // B5X619 // A0A1S3M187 // A0A1S3QXH3…
GO:0016830	MF	carbon-carbon lyase activity	7	672	1.04167	89	65384	0.136119	7.65262	4.1e-05	0.0014	// B5X4B1 // Q3YBN1 // C0HA17 // B5X130 // I0J1J3 // C0H9I1 // B5XE29	// A0A1S3NW86 // A0A1S3NWA9 // B5X4F3 // B5XE29 // A0A1S3L341 // A0A1S3T436 // A0A1S3KYD5 // A0A1S3LYB6 // A0A1S3R3D1 // C0HBQ0 // A0A1S3LYB5 // C0H9N1 // B5XH20 // A0A1S3LMB2 // O73866 // A0A1S3MMQ9 // C0H908 // A0A1S3KYG5 // A0A1S3RBL7 // A0A1S3T428 // A0A1S3QNG3 // A0A1S3R4U9 // A0A1S3LYL2 // A0A1S3RR82 // A0A1S3M0D6 // B5X376 // A0A1S3KY97 // A0A1S3NZZ4 // A0A1S3NAY1 // A0A1S3N2E6 // A0A1S3KZ…
GO:0009055	MF	electron carrier activity	7	672	1.04167	102	65384	0.156001	6.67729	9.8e-05	0.003	// B5XFR7 // B5XEX1 // B5XG92 // B5XAK2 // B5X3P9 // B5X3J5 // B5X6P4	// A1YKX9 // B5XG17 // A0A1S3P1P4 // B5X3C0 // B9EN90 // A0A1S3PP45 // A0A1S3L583 // A0A1S3N642 // A0A1S3MQR5 // A0A1S3QLV6 // B5XG92 // B9EME1 // A0A172JU65 // B5X3J5 // B5XD36 // A0A1S3P469 // B5X5K3 // A0A1S3R6I6 // F8V2C5 // B5XCG9 // B5X7C7 // A0A1S3MLR4 // A0A1S3KNY4 // A0A1S3MVD4 // A0A1S3MMI0 // B9EM99 // A0A1S3P123 // A0A1S3MAX9 // B5XE08 // A0A1S3MU44 // B5XGW6 // A0A1S3LIS2 // B5XBD7 /…
GO:0051539	MF	4 iron, 4 sulfur cluster binding	6	672	0.892857	72	65384	0.110119	8.10813	0.00011	0.0031	// B5XEX1 // B5X4V1 // B5X348 // C0HA71 // C0HA77 // B5X6P4	// A0A1S3NCK8 // B5X7M7 // A0A1S3RFW2 // A0A1S3S0J5 // A0A1S3S169 // A0A1S3P211 // A0A1S3QLC3 // B5XG36 // A0A1S3R8S7 // A0A1S3NC92 // A0A1S3NB92 // A0A1S3QRG7 // A0A1S3MJV8 // A0A1S3MMD0 // A0A1S3MJT8 // B5XC83 // A0A1S3T460 // A0A1S3KLM5 // A0A1S3RYA9 // A0A1S3QT53 // A0A1S3LIS2 // A0A1S3QEQ6 // A0A1S3NGF5 // B5X5Q7 // B5XEX1 // B5X4B2 // A0A1S3QMV4 // A0A1S3KMD0 // A0A1S3KSM6 // A0A1S3MF69 // …
GO:0019205	MF	nucleobase, nucleoside, nucleotide kinase activity	6	672	0.892857	105	65384	0.16059	5.55986	0.00081	0.02	// B5XCJ8 // B5DGM5 // B5DGC6 // B5XCA1 // B5XCD3 // C0PUV7	// A0A1S3LYT1 // A0A1S3S795 // A0A1S3LI38 // A0A1S3R5N6 // A0A1S3L4I9 // A0A1S3KJA5 // A0A1S3RDQ1 // A0A1S3QSY0 // A0A1S3PZF2 // A0A1S3P9N1 // A0A1S3R5J6 // A0A1S3MG06 // B5DGC6 // A0A1S3KJP4 // B5XCD3 // A0A1S3RT52 // A0A1S3LZ09 // A0A1S3LUK2 // B5X3S3 // B5XAW0 // B5XF49 // A0A1S3NNA2 // C0H8Q7 // A0A1S3SBG2 // A0A1S3PTI2 // A0A1S3LTE0 // A0A1S3SBG4 // B5XC23 // A0A1S3PB19 // B5XC27 // B5DGM5 /…
GO:0016776	MF	phosphotransferase activity, phosphate group as acceptor	6	672	0.892857	113	65384	0.172825	5.16625	0.0012	0.026	// B5XCJ8 // B5DGM5 // B5DGC6 // B5XCA1 // B5XCD3 // C0PUV7	// A0A1S3LYT1 // A0A1S3KPH9 // A0A1S3KNQ1 // A0A1S3MDM2 // A0A1S3R5N6 // A0A1S3MPG3 // A0A1S3RDQ1 // A0A1S3PZF2 // A0A1S3KNI3 // A0A1S3R5J6 // A0A1S3MDE2 // B5DGC6 // A0A1S3KPH4 // A0A1S3LZ09 // A0A1S3SUT6 // B5X3S3 // A0A1S3MD21 // A0A1S3KPI3 // B5XAW0 // B5XE35 // B5XCD3 // A0A1S3SBG2 // A0A1S3KNQ6 // A0A1S3LTE0 // A0A1S3SBG4 // A0A1S3KNB5 // A0A1S3MCT8 // B5DGM5 // B5DGM6 // A0A1S3PRM9 // A0A1…
GO:0051920	MF	peroxiredoxin activity	5	672	0.744048	25	65384	0.0382357	19.4595	5.2e-06	0.00048	// B5X8H5 // B5X5Q6 // B5X9Q1 // B5X9L4 // B5X7X7	// B5X9Q1 // B5X6K7 // B5X9L4 // A0A1S3RI85 // B5RIA7 // B5XFD8 // A0A1S3PAZ6 // B5X5Q6 // B5XAN1 // B5XCW3 // B5XFN6 // B5XBY3 // A0A1S3PBC6 // A0A1S3L1Z2 // A0A1S3RRY2 // B5X8N9 // B5XEA6 // B5X8H5 // A0A1S3R4A3 // B5XFI4 // M4VHL9 // B5X838 // B5XCE0 // B5X7X7 // A0A1S3L0Y0

## Sheet: SHK1.Vacuolization.all.GOs
GO_acc	term_type	Term	queryitem	querytotal	%query	refitem	reftotal	%reference	fold-enrichment	pvalue	FDR	entries	entries_ref
GO:0006096	BP	glycolysis	14	606	2.31023	81	65384	0.123884	18.6484	4.1e-14	3.7e-12	// B5DGL3 // B5DFX8 // C0H9M4 // Q2A665 // B5X1B5 // B5DGQ7 // B5X0U6 // B5XB51 // B5DGU0 // I0J1J2 // I0J1J3 // C0H9I1 // B5X0R8 // B5X3K2	// B5XG76 // A0A1S3Q707 // A0A1S3LSB6 // B5DGM7 // Q2A665 // A0A1S3NPZ5 // B5X5Z9 // A0A1S3KRF0 // A0A1S3S1F2 // A0A1S3N190 // B5DGR3 // B5X0U6 // B5DGR5 // B5XD43 // B5DGU0 // A0A1S2WZE0 // I0J1J2 // B5XB92 // A0A1S2WZE3 // C0H9I1 // C0H7T1 // B5XE29 // Q91461 // A0A1S3L6R8 // B9EM22 // A0A1S3PFE0 // A0A1S3LBJ0 // B5DGL3 // A0A1S3PGK8 // B5XGF1 // A0A1S3RSZ1 // A0A1S3NPG7 // A0A1S3L4W8 // B5X3H5…
GO:0046365	BP	monosaccharide catabolic process	18	606	2.9703	108	65384	0.165178	17.9824	2.1e-17	3.4e-15	// B5DGL3 // B5X886 // B9EPN0 // C0H9M4 // Q2A665 // B9EM17 // B5DFX8 // B5X1B5 // B5DGQ7 // B5X0U6 // B5XB51 // B5DGU0 // C0H9U3 // I0J1J3 // C0H9I1 // I0J1J2 // B5X0R8 // B5X3K2	// B9EPN0 // C0H9M4 // A0A1S3S1F2 // B5DGT9 // B5XB51 // A0A1S3LSB6 // B5XE29 // A0A1S3Q6S9 // B9EM22 // A0A1S3PFE0 // A0A1S3PGK8 // B5XGF1 // A0A1S3L341 // B5DGL3 // A0A1S3Q086 // B5X5Z9 // B5DGU0 // O73866 // B5X3H5 // B5X3K2 // A0A1S3PV75 // A0A1S3MIQ1 // B9EM17 // B5XDN9 // A0A1S3PYV6 // B5X1B5 // A0A1S3P282 // A0A1S3Q707 // B5DGM7 // A0A1S3KRF0 // A0A1S3SS19 // A0A1S3LBJ0 // B5XB10 // A0A1S3…
GO:0006007	BP	glucose catabolic process	17	606	2.80528	104	65384	0.15906	17.6366	2.2e-16	2.8e-14	// B5DGL3 // B5DFX8 // B9EPN0 // C0H9M4 // Q2A665 // B9EM17 // B5X1B5 // B5DGQ7 // B5X0U6 // B5XB51 // B5DGU0 // C0H9U3 // I0J1J3 // C0H9I1 // I0J1J2 // B5X0R8 // B5X3K2	// B9EPN0 // C0H9M4 // A0A1S3S1F2 // B5DGT9 // B5XB51 // A0A1S3LSB6 // B5XE29 // A0A1S3Q6S9 // B9EM22 // A0A1S3PFE0 // A0A1S3PGK8 // B5XGF1 // A0A1S3L341 // B5DGL3 // A0A1S3Q086 // B5X5Z9 // B5DGU0 // O73866 // B5X3H5 // B5X3K2 // A0A1S3PV75 // A0A1S3MIQ1 // B9EM17 // B5XDN9 // A0A1S3PYV6 // B5X1B5 // A0A1S3P282 // A0A1S3Q707 // B5DGM7 // A0A1S3KRF0 // A0A1S3SS19 // A0A1S3LBJ0 // B5XB10 // A0A1S3…
GO:0019320	BP	hexose catabolic process	17	606	2.80528	105	65384	0.16059	17.4686	2.6e-16	3e-14	// B5DGL3 // B5DFX8 // B9EPN0 // C0H9M4 // Q2A665 // B9EM17 // B5X1B5 // B5DGQ7 // B5X0U6 // B5XB51 // B5DGU0 // C0H9U3 // I0J1J3 // C0H9I1 // I0J1J2 // B5X0R8 // B5X3K2	// B9EPN0 // C0H9M4 // A0A1S3S1F2 // B5DGT9 // B5XB51 // A0A1S3LSB6 // B5XE29 // A0A1S3Q6S9 // B9EM22 // A0A1S3PFE0 // A0A1S3PGK8 // B5XGF1 // A0A1S3L341 // B5DGL3 // A0A1S3Q086 // B5X5Z9 // B5DGU0 // O73866 // B5X3H5 // B5X3K2 // A0A1S3PV75 // A0A1S3MIQ1 // B9EM17 // B5XDN9 // A0A1S3PYV6 // B5X1B5 // A0A1S3P282 // A0A1S3Q707 // B5DGM7 // A0A1S3KRF0 // A0A1S3SS19 // A0A1S3LBJ0 // B5XB10 // A0A1S3…
GO:0046164	BP	alcohol catabolic process	18	606	2.9703	120	65384	0.183531	16.1842	1.4e-16	2e-14	// B5DGL3 // B5X886 // B9EPN0 // C0H9M4 // Q2A665 // B9EM17 // B5DFX8 // B5X1B5 // B5DGQ7 // B5X0U6 // B5XB51 // B5DGU0 // C0H9U3 // I0J1J3 // C0H9I1 // I0J1J2 // B5X0R8 // B5X3K2	// B9EPN0 // C0H9M4 // A0A1S3LI37 // A0A1S3S1F2 // B5DGT9 // B5XB51 // A0A1S3LSB6 // B5XE29 // A0A1S3Q6S9 // B9EM22 // A0A1S3PFE0 // A0A1S3PGK8 // B5XGF1 // A0A1S3L341 // B5DGL3 // A0A1S3Q086 // B5X5Z9 // B5DGU0 // O73866 // B5X3H5 // B5X3K2 // A0A1S3PV75 // A0A1S3MIQ1 // B9EM17 // B5XDN9 // A0A1S3PYV6 // B5X1B5 // A0A1S3P282 // A0A1S3Q707 // A0A1S3MD74 // B5DGM7 // A0A1S3KRF0 // A0A1S3SS19 // A0…
GO:0044275	BP	cellular carbohydrate catabolic process	18	606	2.9703	131	65384	0.200355	14.8252	7.1e-16	7.3e-14	// B5DGL3 // B5X886 // B9EPN0 // C0H9M4 // Q2A665 // B9EM17 // B5DFX8 // B5X1B5 // B5DGQ7 // B5X0U6 // B5XB51 // B5DGU0 // C0H9U3 // I0J1J3 // C0H9I1 // I0J1J2 // B5X0R8 // B5X3K2	// B9EPN0 // C0H9M4 // A0A1S3LI37 // A0A1S3S1F2 // B5DGT9 // B5XB51 // A0A1S3LSB6 // B5XE29 // A0A1S3Q6S9 // B9EM22 // A0A1S3PFE0 // A0A1S3PGK8 // B5XGF1 // A0A1S3L341 // B5DGL3 // A0A1S3Q086 // Q91461 // B5X5Z9 // B5DGU0 // O73866 // B5X3H5 // B5X3K2 // A0A1S3PV75 // A0A1S3MIQ1 // B9EM17 // B5XDN9 // A0A1S3PYV6 // B5X1B5 // A0A1S3P282 // A0A1S3Q707 // A0A1S3MD74 // B5DGM7 // A0A1S3LS71 // A0A1S3…
GO:0016052	BP	carbohydrate catabolic process	20	606	3.30033	160	65384	0.244708	13.4868	1.2e-16	1.8e-14	// B5DGL3 // B5X886 // B9EPN0 // C0H9M4 // Q2A665 // C0H9I1 // B9EM17 // B5DFX8 // B5X1B5 // B5X4N7 // B5DGQ7 // B5X0U6 // B5XB51 // B5DGU0 // C0H9U3 // I0J1J3 // B9ELT2 // I0J1J2 // B5X0R8 // B5X3K2	// B9EPN0 // C0H9M4 // A0A1S3LI37 // A0A1S3QJL1 // B5XET9 // A0A1S3S1F2 // B5DGT9 // B5XCN8 // B5XB51 // A0A1S3LSB6 // B5XE29 // A0A1S3Q6S9 // B9EM22 // A0A1S3PFE0 // A0A1S3PGK8 // B5XGF1 // B5XAN4 // A0A1S3RUT8 // A0A1S3L341 // B5XFA3 // A0A1S3PU66 // A0A1S3RB55 // A0A1S3Q086 // Q91461 // B5X5Z9 // B5DGU0 // O73866 // B5X3H5 // B5X3K2 // A0A1S3PV75 // A0A1S3NPG7 // A0A1S3MIQ1 // B9EM17 // B5XDN9…
GO:0006457	BP	protein folding	23	606	3.79538	191	65384	0.29212	12.9925	1.6e-18	3.3e-16	// U5KQ14 // Q9W6K6 // U5KR11 // B5DG64 // C0HBF1 // B5XDR0 // B9EMD3 // C0HBB4 // B9EMS3 // C0HAF8 // B9EPT4 // B5X4M2 // B5X1Z2 // B5XA06 // C0PUU5 // U5KQM7 // C0HAB6 // B9EL76 // B5X2M8 // B9EQ66 // B5DG94 // B5RI17 // C0HBK7	// A0A1S3NS46 // A0A1S3PN43 // B5X9U4 // A0A1S3S062 // A0A1S3RRD2 // A0A1S3QPN8 // A0A1S3KWX9 // C0H9S8 // A0A1S3NA10 // A0A1S3MN98 // A0A1S3PTN7 // C0HBF1 // C0HBF0 // A0A1S3RBH6 // A0A1S3Q971 // B5XGN0 // A0A1S3L7N1 // A0A1S3SWX8 // A0A1S3NZP0 // A0A1S3Q7I9 // B9EPE9 // C0PU61 // B5XBF7 // B5X685 // B5X8F5 // B5X207 // A0A1S3T539 // A0A1S3S0C3 // C0HAB6 // A0A1S3MP94 // B5X5R4 // B5X2M8 // B5X7…
GO:0046034	BP	ATP metabolic process	10	606	1.65017	89	65384	0.136119	12.123	1.3e-08	4.3e-07	// B5DGM5 // P68529 // B5DGC9 // B5DG78 // C0H9X1 // B5RI36 // B5X6S0 // B5XCA1 // B5XD97 // B5X195	// B5X161 // B5XDF0 // B5X5B0 // A0A1S3PZF2 // B5X597 // A0A1S3P9I9 // B5DGC9 // A0A1S3L1F9 // C0H715 // B5XD97 // B5X626 // M4VHK7 // W0LQS8 // B5X6L8 // E2JDJ1 // B5XGG0 // B5RIB1 // B5XEN1 // A0A1S3NYI0 // B5DH26 // B5X195 // A0A1S3KYH8 // B5DGM5 // B5DGM6 // C0H9X1 // B5X5F2 // B5X6S0 // B5XFD0 // B5X274 // B5XB37 // A0A1S3RQN1 // B5XAD3 // Q35920 // B5DGN1 // B5DGN2 // B5DGN3 // B5X9X1 // B5…
GO:0009205	BP	purine ribonucleoside triphosphate metabolic process	13	606	2.14521	116	65384	0.177413	12.0916	9.6e-11	4.5e-09	// B5XCJ8 // B5DGM5 // P68529 // B5DGC9 // B5DGC6 // B5DG78 // C0H9X1 // B5XE35 // B5RI36 // B5X6S0 // B5XCA1 // B5XD97 // B5X195	// B5XGG0 // B5X161 // B5XDF0 // A0A1S3R5N6 // B5X5B0 // B5RIB1 // A0A1S3PZF2 // B5X597 // A0A1S3P9I9 // B5DGC9 // B5DGC6 // A0A1S3L1F9 // C0H715 // B5XD97 // B5X626 // A0A1S3SUT6 // M4VHK7 // W0LQS8 // B5XAW0 // B5X6L8 // E2JDJ1 // B5XE35 // A0A1S3P0X0 // A0A1S3SBG2 // A0A1S3LTE0 // A0A1S3SBG4 // A0A1S3R5J6 // B5XEN1 // Q9YGC0 // A0A1S3NYI0 // B5DH26 // B5X195 // A0A1S3KYH8 // B5DGM5 // B5DGM6 /…
GO:0009144	BP	purine nucleoside triphosphate metabolic process	13	606	2.14521	116	65384	0.177413	12.0916	9.6e-11	4.5e-09	// B5XCJ8 // B5DGM5 // P68529 // B5DGC9 // B5DGC6 // B5DG78 // C0H9X1 // B5XE35 // B5RI36 // B5X6S0 // B5XCA1 // B5XD97 // B5X195	// B5XGG0 // B5X161 // B5XDF0 // A0A1S3R5N6 // B5X5B0 // B5RIB1 // A0A1S3PZF2 // B5X597 // A0A1S3P9I9 // B5DGC9 // B5DGC6 // A0A1S3L1F9 // C0H715 // B5XD97 // B5X626 // A0A1S3SUT6 // M4VHK7 // W0LQS8 // B5XAW0 // B5X6L8 // E2JDJ1 // B5XE35 // A0A1S3P0X0 // A0A1S3SBG2 // A0A1S3LTE0 // A0A1S3SBG4 // A0A1S3R5J6 // B5XEN1 // Q9YGC0 // A0A1S3NYI0 // B5DH26 // B5X195 // A0A1S3KYH8 // B5DGM5 // B5DGM6 /…
GO:0001732	BP	formation of translation initiation complex	5	606	0.825083	45	65384	0.0688242	11.9883	6.3e-05	0.001	// B5DGH9 // C0H9I7 // B9ENG2 // B9ENH4 // C0H9S0	// B5DGK2 // A0A1S3PT98 // A0A1S3N267 // A0A1S3NHU9 // A0A1S3QSD2 // B5X0W4 // C0H9I7 // B9ENH4 // A0A1S3RRZ4 // B9EP50 // A0A1S3NAJ6 // B5XA72 // A0A1S3RAF8 // A0A1S3PDN7 // B5XE93 // A0A1S3KS95 // B5X7Y0 // A0A1S3QL22 // A0A1S3N3K4 // B5XBY6 // B5X9A4 // A0A1S3RS31 // A0A1S3KT28 // A0A1S3RS09 // A0A1S3NBL2 // B5XF07 // C0HAF2 // A0A1S3M0T0 // A0A1S3NH48 // A0A1S3NH28 // A0A1S3KWE6 // B5X5X0 // …
GO:0045454	BP	cell redox homeostasis	17	606	2.80528	155	65384	0.237061	11.8336	2e-13	1.6e-11	// D0QEL0 // A0A0G3B776 // C0PUP1 // C0HBF4 // B5X291 // B5X9Q1 // B5X6M7 // B5X1P6 // B5X3C0 // B5X8H5 // B5X9L4 // B5X1H7 // B5DGD1 // B5X5Q6 // B5RIB0 // B5X7X7 // C0PU58	// B5XBV8 // B9ENN0 // C0PUP1 // B5X6M7 // B5X291 // A0A1S3RZE5 // B5X3C0 // A0A1S3PP45 // B5RIA7 // A0A1S3PX04 // B5XE28 // A0A1S3NZC9 // A0A1S3PAZ6 // A0A1S3QLV6 // A0A1S3LV10 // B5XAN1 // A0A1S3PZN5 // B5XFN6 // A0A1S3MF21 // A0A1S3QAU1 // B5XFD8 // A0A0G3BAW3 // B9EP13 // B5XFI4 // A0A0G3B776 // A0A1S3MEY7 // B9EPV5 // A0A1S3QQT5 // A0A1S3PBL0 // B5RIB0 // A0A1S3RT57 // B9ELH6 // B5XDK7 // A0…
GO:0006090	BP	pyruvate metabolic process	5	606	0.825083	50	65384	0.0764713	10.7894	0.0001	0.0016	// B5DGL3 // B5X485 // C0H9M4 // B5X4R5 // B5XB51	// A0A1S3RV52 // B5X4B1 // C0H9M4 // A0A1S3NHE5 // A0A1S3L394 // A0A1S3QC57 // B5X1E3 // A0A1S3RIQ4 // C0HAP1 // B5XB51 // B5XD43 // A0A1S3Q5S7 // B5XH68 // A0A1S3QKE9 // B5XB10 // A0A1S3LK49 // B5XGF1 // A0A1S3Q3Q8 // C0H981 // B5X712 // A0A1S3S4U9 // A0A1S3KQE9 // A0A1S3NGX4 // A0A1S3NIT2 // B5DGL3 // A0A1S3Q998 // Q3YBN1 // A0A1S3Q997 // A0A1S3LF96 // A0A1S3R933 // B9EMU9 // C0PUH8 // C0HAN7 /…
GO:0009199	BP	ribonucleoside triphosphate metabolic process	13	606	2.14521	134	65384	0.204943	10.4674	5.9e-10	2.4e-08	// B5XCJ8 // B5DGM5 // P68529 // B5DGC9 // B5DGC6 // B5DG78 // C0H9X1 // B5XE35 // B5RI36 // B5X6S0 // B5XCA1 // B5XD97 // B5X195	// A0A1S3S795 // A0A1S3PAS6 // A0A1S3LI38 // B5XGG0 // B5X161 // B5XDF0 // A0A1S3R5N6 // B5X5B0 // B5RIB1 // A0A1S3KJA5 // A0A1S3PZF2 // B5X597 // B5X4W4 // A0A1S3P9I9 // B5DGC9 // A0A1S3MG06 // B5DGC6 // A0A1S3L1F9 // C0H715 // B5XD97 // B5X626 // A0A1S3SUT6 // M4VHK7 // W0LQS8 // B5XAW0 // B5X6L8 // E2JDJ1 // B5XE35 // A0A1S3P0X0 // A0A1S3SBG2 // A0A1S3LTE0 // A0A1S3SBG4 // A0A1S3R5J6 // B5XEN1…
GO:0009206	BP	purine ribonucleoside triphosphate biosynthetic process	9	606	1.48515	93	65384	0.142237	10.4414	2.6e-07	6.7e-06	// B5XCJ8 // P68529 // B5DGC9 // B5DGC6 // B5DG78 // B5XE35 // B5RI36 // B5X6S0 // B5X195	// B5XDF0 // A0A1S3R5N6 // B5X5B0 // B5RIB1 // B5X597 // A0A1S3R5J6 // B5DGC9 // B5DGC6 // C0H715 // B5X626 // A0A1S3SUT6 // M4VHK7 // W0LQS8 // B5XAW0 // B5X6L8 // E2JDJ1 // B5XE35 // B5XGG0 // A0A1S3SBG2 // A0A1S3SBG4 // B5XEN1 // A0A1S3P0X0 // A0A1S3NYI0 // B5DH26 // B5X195 // B5X5F2 // B5X6S0 // B5XB37 // A0A1S3RQN1 // B5XA37 // B5XAD3 // Q35920 // A0A1S3LCC2 // B5DGN1 // B5DGN2 // B5DGN3 // …
GO:0009145	BP	purine nucleoside triphosphate biosynthetic process	9	606	1.48515	93	65384	0.142237	10.4414	2.6e-07	6.7e-06	// B5XCJ8 // P68529 // B5DGC9 // B5DGC6 // B5DG78 // B5XE35 // B5RI36 // B5X6S0 // B5X195	// B5XDF0 // A0A1S3R5N6 // B5X5B0 // B5RIB1 // B5X597 // A0A1S3R5J6 // B5DGC9 // B5DGC6 // C0H715 // B5X626 // A0A1S3SUT6 // M4VHK7 // W0LQS8 // B5XAW0 // B5X6L8 // E2JDJ1 // B5XE35 // B5XGG0 // A0A1S3SBG2 // A0A1S3SBG4 // B5XEN1 // A0A1S3P0X0 // A0A1S3NYI0 // B5DH26 // B5X195 // B5X5F2 // B5X6S0 // B5XB37 // A0A1S3RQN1 // B5XA37 // B5XAD3 // Q35920 // A0A1S3LCC2 // B5DGN1 // B5DGN2 // B5DGN3 // …
GO:0009150	BP	purine ribonucleotide metabolic process	18	606	2.9703	188	65384	0.287532	10.3303	4.2e-13	3.1e-11	// B5X373 // B5XCJ8 // B5DGM5 // B5DGC9 // B5DFU2 // B5DGC6 // B5DG78 // C0HAG6 // C0H9X1 // B5XE35 // B5RI36 // B5X6S0 // B5XCA1 // B5XD97 // P68529 // B5XBZ7 // B5X195 // C0H976	// A0A1S3MIB4 // A0A1S3PSZ6 // A0A1S3T6P8 // A0A1S3P9I9 // A0A1S2X0C2 // B5XGG0 // B5X161 // B5XBZ7 // B5XDF0 // A0A1S3R5N6 // A0A1S3MM17 // B5X5B0 // B5RIB1 // A0A1S3R6Y8 // A0A1S3PZF2 // B5X597 // A0A1S3MJE5 // P68529 // B5DGC9 // B5DGC6 // A0A1S3KPP8 // A0A1S3L1F9 // C0H715 // B5XD97 // B5X626 // A0A1S3SUT6 // M4VHK7 // A0A1S3LIL6 // W0LQS8 // A0A1S3MM09 // B5XAW0 // B5X6L8 // C0H8Y0 // A0A1S3…
GO:0006006	BP	glucose metabolic process	17	606	2.80528	184	65384	0.281414	9.9685	3.3e-12	2e-10	// B5DGL3 // B5DFX8 // B9EPN0 // C0H9M4 // Q2A665 // B9EM17 // B5X1B5 // B5DGQ7 // B5X0U6 // B5XB51 // B5DGU0 // C0H9U3 // I0J1J3 // C0H9I1 // I0J1J2 // B5X0R8 // B5X3K2	// A0A1S3NAG1 // B9EPN0 // A0A1S3RMY0 // A0A1S3NV54 // A0A1S3S1F2 // B5DGT9 // B5XB51 // A0A1S3LSB6 // A0A1S3Q5S7 // B5XE29 // A0A1S3Q6S9 // B9EM22 // A0A1S3MYS2 // A0A1S3QJT3 // B5XGF1 // B5X6U5 // A0A1S3PKB5 // A0A1S3L341 // A0A1S3MTL0 // A0A1S3KQE9 // B5DGL3 // A0A1S3Q086 // A0A1S3NA20 // B9EMU9 // A0A1S3LK49 // A0A1S3LGI4 // B5X5Z9 // B5DGU0 // A0A1S3Q5R6 // B5X3K2 // O73866 // A0A1S3R315 // …
GO:0009141	BP	nucleoside triphosphate metabolic process	13	606	2.14521	141	65384	0.215649	9.94771	1.1e-09	4.4e-08	// B5XCJ8 // B5DGM5 // P68529 // B5DGC9 // B5DGC6 // B5DG78 // C0H9X1 // B5XE35 // B5RI36 // B5X6S0 // B5XCA1 // B5XD97 // B5X195	// A0A1S3S795 // B5DGK5 // A0A1S3PAS6 // A0A1S3LI38 // B5XGG0 // B5X161 // B5XDF0 // A0A1S3R5N6 // B5X5B0 // B5RIB1 // A0A1S3KJA5 // A0A1S3PZF2 // B5X597 // B5X4W4 // A0A1S3P9I9 // B5DGC9 // A0A1S3MG06 // B5DGC6 // A0A1S3L1F9 // C0H715 // B5XD97 // B5X626 // A0A1S3SUT6 // M4VHK7 // W0LQS8 // B5XAW0 // B5X6L8 // E2JDJ1 // B5XE35 // A0A1S3P0X0 // A0A1S3SBG2 // A0A1S3LTE0 // A0A1S3SBG4 // A0A1S3R5J6…
GO:0009152	BP	purine ribonucleotide biosynthetic process	16	606	2.64026	177	65384	0.270708	9.75317	1.9e-11	9.6e-10	// B5X373 // B5XCJ8 // B5DGM5 // B5DGC9 // B5DFU2 // B5DGC6 // B5DG78 // C0HAG6 // B5XE35 // B5RI36 // B5X6S0 // B5XCA1 // P68529 // B5XBZ7 // B5X195 // C0H976	// A0A1S3MIB4 // A0A1S3PSZ6 // A0A1S3T6P8 // A0A1S3P9I9 // A0A1S2X0C2 // B5XGG0 // B5XBZ7 // B5XDF0 // A0A1S3R5N6 // A0A1S3MM17 // B5X5B0 // B5RIB1 // A0A1S3R6Y8 // A0A1S3PZF2 // B5X597 // A0A1S3MJE5 // P68529 // B5DGC9 // B5DGC6 // A0A1S3KPP8 // C0H715 // B5X626 // A0A1S3SUT6 // M4VHK7 // A0A1S3LIL6 // W0LQS8 // A0A1S3MM09 // B5XAW0 // B5X6L8 // C0H8Y0 // A0A1S3LJF5 // E2JDJ1 // B5XE35 // A0A1S3…
GO:0009142	BP	nucleoside triphosphate biosynthetic process	10	606	1.65017	113	65384	0.172825	9.54818	1.3e-07	3.6e-06	// B5XCJ8 // B5DGM5 // P68529 // B5DGC9 // B5DGC6 // B5DG78 // B5XE35 // B5RI36 // B5X6S0 // B5X195	// A0A1S3S795 // A0A1S3PAS6 // A0A1S3LI38 // B5XGG0 // B5XDF0 // A0A1S3R5N6 // B5X5B0 // B5RIB1 // A0A1S3KJA5 // B5X597 // B5X4W4 // A0A1S3R5J6 // B5DGC9 // A0A1S3MG06 // B5DGC6 // C0H715 // B5X626 // A0A1S3SUT6 // M4VHK7 // W0LQS8 // B5XAW0 // B5X6L8 // E2JDJ1 // B5XE35 // A0A1S3P0X0 // A0A1S3SBG2 // A0A1S3SBG4 // B5XEN1 // C0H9B7 // A0A1S3NYI0 // B5DH26 // B5X195 // B5DGM5 // B5DGM6 // B5X5F2 /…
GO:0031497	BP	chromatin assembly	6	606	0.990099	69	65384	0.10553	9.38212	4.7e-05	0.00094	// B9ELQ9 // B9ELD5 // B9EN25 // B5X1W1 // B5DFV7 // P84408	// A0A1S3SIK8 // B9EPS5 // A0A1S3NKX2 // A0A1S3LLD4 // A0A1S3PJ20 // B5X2G0 // A0A1S3MY65 // A0A1S3Q744 // A0A1S3P8H1 // A0A1S3PG66 // A0A1S3SIT2 // B9ELY7 // B5DFV7 // B9ELA2 // B5X351 // A0A1S3SU55 // B5DGT6 // P84408 // B5DGT5 // B9ENC7 // A0A1S3SU36 // A0A1S3SU11 // A0A1S3SU17 // A0A1S3PIB9 // A0A1S3M5S2 // A0A1S3PIB4 // A0A1S3RPW5 // A0A1S3KL41 // A0A1S3P5V9 // B9EN25 // A0A1S3NNT9 // B5DGS1…
GO:0006334	BP	nucleosome assembly	6	606	0.990099	69	65384	0.10553	9.38212	4.7e-05	0.00094	// B9ELQ9 // B9ELD5 // B9EN25 // B5X1W1 // B5DFV7 // P84408	// A0A1S3SIK8 // B9EPS5 // A0A1S3NKX2 // A0A1S3LLD4 // A0A1S3PJ20 // B5X2G0 // A0A1S3MY65 // A0A1S3Q744 // A0A1S3P8H1 // A0A1S3PG66 // A0A1S3SIT2 // B9ELY7 // B5DFV7 // B9ELA2 // B5X351 // A0A1S3SU55 // B5DGT6 // P84408 // B5DGT5 // B9ENC7 // A0A1S3SU36 // A0A1S3SU11 // A0A1S3SU17 // A0A1S3PIB9 // A0A1S3M5S2 // A0A1S3PIB4 // A0A1S3RPW5 // A0A1S3KL41 // A0A1S3P5V9 // B9EN25 // A0A1S3NNT9 // B5DGS1…
GO:0015986	BP	ATP synthesis coupled proton transport	6	606	0.990099	70	65384	0.10706	9.24809	5.1e-05	0.00094	// B5DGC9 // P68529 // B5DG78 // B5RI36 // B5X6S0 // B5X195	// B5DG78 // B5XAI3 // P68529 // B5XBT8 // B5X9Q3 // C0H702 // B5XGG0 // B5XDF0 // A0A1S3NWP8 // B5X4S6 // B5XGB9 // B5X5B0 // B5XF93 // B5X5F2 // M4UZU2 // B5XB94 // B9ENJ3 // B5X597 // B5XB37 // B5X932 // A0A1S3PEL4 // B5XA73 // A0A1S3RQN1 // B5X6L8 // B5XCL0 // B5XCB0 // C0H715 // B5XAD3 // B5XAI5 // Q35920 // B5XDM0 // M4VHK7 // B5X9A5 // W0LQS8 // B5XB87 // B5X5E2 // A0A1S3LGZ3 // B5XCS5 // …
GO:0006754	BP	ATP biosynthetic process	6	606	0.990099	70	65384	0.10706	9.24809	5.1e-05	0.00094	// B5DGC9 // P68529 // B5DG78 // B5RI36 // B5X6S0 // B5X195	// B5DG78 // B5XAI3 // P68529 // B5XBT8 // B5X9Q3 // C0H702 // B5XGG0 // B5XDF0 // A0A1S3NWP8 // B5X4S6 // B5XGB9 // B5X5B0 // B5XF93 // B5X5F2 // M4UZU2 // B5XB94 // B9ENJ3 // B5X597 // B5XB37 // B5X932 // A0A1S3PEL4 // B5XA73 // A0A1S3RQN1 // B5X6L8 // B5XCL0 // B5XCB0 // C0H715 // B5XAD3 // B5XAI5 // Q35920 // B5XDM0 // M4VHK7 // B5X9A5 // W0LQS8 // B5XB87 // B5X5E2 // A0A1S3LGZ3 // B5XCS5 // …
GO:0015985	BP	energy coupled proton transport, down electrochemical gradient	6	606	0.990099	70	65384	0.10706	9.24809	5.1e-05	0.00094	// B5DGC9 // P68529 // B5DG78 // B5RI36 // B5X6S0 // B5X195	// B5DG78 // B5XAI3 // P68529 // B5XBT8 // B5X9Q3 // C0H702 // B5XGG0 // B5XDF0 // A0A1S3NWP8 // B5X4S6 // B5XGB9 // B5X5B0 // B5XF93 // B5X5F2 // M4UZU2 // B5XB94 // B9ENJ3 // B5X597 // B5XB37 // B5X932 // A0A1S3PEL4 // B5XA73 // A0A1S3RQN1 // B5X6L8 // B5XCL0 // B5XCB0 // C0H715 // B5XAD3 // B5XAI5 // Q35920 // B5XDM0 // M4VHK7 // B5X9A5 // W0LQS8 // B5XB87 // B5X5E2 // A0A1S3LGZ3 // B5XCS5 // …
GO:0015992	BP	proton transport	6	606	0.990099	71	65384	0.108589	9.11784	5.6e-05	0.00098	// B5DGC9 // P68529 // B5DG78 // B5RI36 // B5X6S0 // B5X195	// B5DG78 // B5XAI3 // P68529 // B5XBT8 // B5X9Q3 // C0H702 // B5XGG0 // B5XDF0 // A0A1S3NWP8 // B5X4S6 // B5XGB9 // B5X5B0 // B5XF93 // B5X5F2 // M4UZU2 // B5XB94 // B9ENJ3 // A0A1S3SKP0 // B5X597 // B5XB37 // B5X932 // A0A1S3PEL4 // B5XA73 // A0A1S3RQN1 // B5X6L8 // B5XCL0 // B5XCB0 // C0H715 // B5XAD3 // B5XAI5 // Q35920 // B5XDM0 // M4VHK7 // B5X9A5 // W0LQS8 // B5XB87 // B5X5E2 // A0A1S3LGZ3…
GO:0006818	BP	hydrogen transport	6	606	0.990099	71	65384	0.108589	9.11784	5.6e-05	0.00098	// B5DGC9 // P68529 // B5DG78 // B5RI36 // B5X6S0 // B5X195	// B5DG78 // B5XAI3 // P68529 // B5XBT8 // B5X9Q3 // C0H702 // B5XGG0 // B5XDF0 // A0A1S3NWP8 // B5X4S6 // B5XGB9 // B5X5B0 // B5XF93 // B5X5F2 // M4UZU2 // B5XB94 // B9ENJ3 // A0A1S3SKP0 // B5X597 // B5XB37 // B5X932 // A0A1S3PEL4 // B5XA73 // A0A1S3RQN1 // B5X6L8 // B5XCL0 // B5XCB0 // C0H715 // B5XAD3 // B5XAI5 // Q35920 // B5XDM0 // M4VHK7 // B5X9A5 // W0LQS8 // B5XB87 // B5X5E2 // A0A1S3LGZ3…
GO:0006333	BP	chromatin assembly or disassembly	6	606	0.990099	72	65384	0.110119	8.9912	6e-05	0.001	// B9ELQ9 // B9ELD5 // B9EN25 // B5X1W1 // B5DFV7 // P84408	// A0A1S3SIK8 // B9EPS5 // A0A1S3NKX2 // A0A1S3LLD4 // A0A1S3PJ20 // B5X2G0 // A0A1S3MY65 // A0A1S3Q744 // A0A1S3P8H1 // A0A1S3PG66 // A0A1S3SIT2 // B9ELY7 // B5DFV7 // B9ELA2 // B5X351 // A0A1S3SU55 // B5DGT6 // P84408 // B5DGT5 // B9ENC7 // A0A1S3SU36 // A0A1S3SU11 // A0A1S3SU17 // A0A1S3PIB9 // A0A1S3M5S2 // A0A1S3PIB4 // A0A1S3RPW5 // A0A1S3KL41 // A0A1S3P5V9 // B5X3F6 // B9EN25 // A0A1S3NNT9…
GO:0009167	BP	purine ribonucleoside monophosphate metabolic process	7	606	1.15512	84	65384	0.128472	8.9912	1.5e-05	0.00032	// B5X373 // B5DGM5 // C0H976 // B5DFU2 // C0HAG6 // B5XCA1 // B5XBZ7	// B5X373 // A0A1S3MIB4 // B5DGM3 // A0A1S3T6P8 // B5DGM5 // B5DGM4 // A0A1S3KP02 // A0A1S2X0C2 // A0A1S3S6A0 // A0A1S3S6A3 // A0A1S3MLX1 // C0HAG6 // A0A1S3LI77 // A0A1S3MM17 // A0A1S3MDI5 // A0A1S3LCD4 // A0A1S3KID5 // B5XBZ7 // A0A1S3MUM9 // A0A1S3LCD9 // A0A1S3R6Y8 // A0A1S3KQP2 // A0A1S3KRR8 // A0A1S3MJE5 // A0A1S3KU02 // A0A1S3P9I9 // A0A1S3PZF2 // A0A1S3PA63 // A0A1S3PA46 // B5DGM6 // A0A1…
GO:0009126	BP	purine nucleoside monophosphate metabolic process	7	606	1.15512	84	65384	0.128472	8.9912	1.5e-05	0.00032	// B5X373 // B5DGM5 // C0H976 // B5DFU2 // C0HAG6 // B5XCA1 // B5XBZ7	// B5X373 // A0A1S3MIB4 // B5DGM3 // A0A1S3T6P8 // B5DGM5 // B5DGM4 // A0A1S3KP02 // A0A1S2X0C2 // A0A1S3S6A0 // A0A1S3S6A3 // A0A1S3MLX1 // C0HAG6 // A0A1S3LI77 // A0A1S3MM17 // A0A1S3MDI5 // A0A1S3LCD4 // A0A1S3KID5 // B5XBZ7 // A0A1S3MUM9 // A0A1S3LCD9 // A0A1S3R6Y8 // A0A1S3KQP2 // A0A1S3KRR8 // A0A1S3MJE5 // A0A1S3KU02 // A0A1S3P9I9 // A0A1S3PZF2 // A0A1S3PA63 // A0A1S3PA46 // B5DGM6 // A0A1…
GO:0034728	BP	nucleosome organization	6	606	0.990099	73	65384	0.111648	8.86803	6.5e-05	0.0011	// B9ELQ9 // B9ELD5 // B9EN25 // B5X1W1 // B5DFV7 // P84408	// A0A1S3SIK8 // B9EPS5 // A0A1S3NKX2 // A0A1S3LLD4 // A0A1S3SCZ3 // A0A1S3PJ20 // B5X2G0 // A0A1S3MY65 // A0A1S3Q744 // A0A1S3P8H1 // A0A1S3PG66 // A0A1S3SIT2 // B9ELY7 // B5DFV7 // B9ELA2 // B5X351 // A0A1S3SU55 // B5DGT6 // P84408 // B5DGT5 // B9ENC7 // A0A1S3SU36 // A0A1S3SU11 // A0A1S3SU17 // A0A1S3PIB9 // A0A1S3M5S2 // A0A1S3PIB4 // A0A1S3RPW5 // A0A1S3KL41 // A0A1S3P5V9 // B9EN25 // A0A1S3…
GO:0009201	BP	ribonucleoside triphosphate biosynthetic process	9	606	1.48515	111	65384	0.169766	8.74819	1.2e-06	2.8e-05	// B5XCJ8 // P68529 // B5DGC9 // B5DGC6 // B5DG78 // B5XE35 // B5RI36 // B5X6S0 // B5X195	// A0A1S3S795 // A0A1S3PAS6 // A0A1S3LI38 // B5XGG0 // B5XDF0 // A0A1S3R5N6 // B5X5B0 // B5RIB1 // A0A1S3KJA5 // B5X597 // B5X4W4 // A0A1S3R5J6 // B5DGC9 // A0A1S3MG06 // B5DGC6 // C0H715 // B5X626 // A0A1S3SUT6 // M4VHK7 // W0LQS8 // B5XAW0 // B5X6L8 // E2JDJ1 // B5XE35 // A0A1S3P0X0 // A0A1S3SBG2 // A0A1S3SBG4 // B5XEN1 // C0H9B7 // A0A1S3NYI0 // B5DH26 // B5X195 // B5X5F2 // B5X6S0 // B5XB37 /…
GO:0009259	BP	ribonucleotide metabolic process	18	606	2.9703	225	65384	0.344121	8.63155	8.7e-12	4.8e-10	// B5X373 // B5XCJ8 // B5DGM5 // B5DGC9 // B5DFU2 // B5DGC6 // B5DG78 // C0HAG6 // C0H9X1 // B5XE35 // B5RI36 // B5X6S0 // B5XCA1 // B5XD97 // P68529 // B5XBZ7 // B5X195 // C0H976	// A0A1S3S795 // A0A1S3PSZ6 // A0A1S3T6P8 // A0A1S3P9I9 // A0A1S2X0C2 // A0A1S3LI38 // B5XGG0 // B5X161 // B5XBZ7 // B5XDF0 // A0A1S3R5N6 // A0A1S3MM17 // B5X5B0 // B5RIB1 // A0A1S3KJA5 // A0A1S3R6Y8 // A0A1S3PZF2 // B5X597 // A0A1S3MJE5 // A0A1S3P9N1 // B5X4W4 // P68529 // B5DGC9 // A0A1S3MG06 // B5DGC6 // A0A1S3KPP8 // A0A1S3L1F9 // C0H715 // A0A1S3MIB4 // B5XD97 // B5X626 // A0A1S3SUT6 // M4VH…
GO:0034314	BP	Arp2/3 complex-mediated actin nucleation	5	606	0.825083	63	65384	0.0963538	8.56305	0.00031	0.0041	// C0HBR6 // C0H8E0 // B5DGD5 // C0H9H2 // C0HBE5	// B5X9U3 // B5XG16 // B5X6M8 // C0HBR6 // A0A1S3S020 // A0A1S3L3P3 // A0A1S3NVZ4 // C0PUS8 // C0H8E0 // B5XE62 // B5X8R6 // B9ELI3 // B9EMV2 // B5XGW7 // A0A1S3KL27 // A0A1S3N627 // A0A1S3ST17 // A0A1S3QRD5 // A0A1S3MVA4 // A0A1S3ST11 // B5XCW2 // B5XGN2 // A0A1S3L4F4 // B5X7J0 // B5XE91 // B5X7J3 // A0A1S3L3B9 // B5XGH1 // B5XBU8 // A0A1S3QAB7 // B9EMH3 // B5XFQ5 // A0A1S3N5U5 // A0A1S3L385 // …
GO:0044282	BP	small molecule catabolic process	20	606	3.30033	267	65384	0.408357	8.08198	2.2e-12	1.4e-10	// C0PU77 // B5DGL3 // B5X886 // B9EPN0 // C0H9M4 // Q2A665 // B9EM17 // B5DFX8 // B5X1B5 // B5X4N7 // B5DGQ7 // B5X0U6 // B5XB51 // B5DGU0 // C0H9U3 // I0J1J3 // C0H9I1 // I0J1J2 // B5X0R8 // B5X3K2	// A0A1S3LDS5 // B5X3N8 // A0A1S3N0A3 // B9EPN0 // C0H9M4 // A0A1S3LI37 // A0A1S3NNV0 // A0A1S3SST8 // A0A1S3SN28 // A0A1S3MSE8 // A0A1S3M2M9 // A0A1S3S1F2 // A0A1S3M2R8 // B5DGT9 // B5XB51 // A0A1S3LSB6 // B5DGU0 // A0A1S3M3S2 // A0A1S3N0K4 // I0J1J3 // B5XE29 // B5X6U8 // A0A1S3QB34 // B5X919 // B9EM22 // C0HB12 // A0A1S3L8R0 // A0A1S3PGR8 // B5XGF1 // C0HAI9 // A0A1S3QEL3 // A0A1S3MDL2 // M4V2…
GO:0009260	BP	ribonucleotide biosynthetic process	16	606	2.64026	214	65384	0.327297	8.06687	3.3e-10	1.4e-08	// B5X373 // B5XCJ8 // B5DGM5 // B5DGC9 // B5DFU2 // B5DGC6 // B5DG78 // C0HAG6 // B5XE35 // B5RI36 // B5X6S0 // B5XCA1 // P68529 // B5XBZ7 // B5X195 // C0H976	// A0A1S3S795 // A0A1S3PSZ6 // A0A1S3T6P8 // A0A1S3P9I9 // A0A1S2X0C2 // A0A1S3LI38 // B5XGG0 // B5XBZ7 // B5XDF0 // A0A1S3R5N6 // A0A1S3MM17 // B5X5B0 // B5RIB1 // A0A1S3KJA5 // A0A1S3R6Y8 // A0A1S3PZF2 // B5X597 // A0A1S3MJE5 // A0A1S3P9N1 // B5X4W4 // P68529 // B5DGC9 // A0A1S3MG06 // B5DGC6 // A0A1S3KPP8 // C0H715 // A0A1S3MIB4 // B5X626 // A0A1S3SUT6 // M4VHK7 // A0A1S3LIL6 // W0LQS8 // A0A1…
GO:0010498	BP	proteasomal protein catabolic process	5	606	0.825083	68	65384	0.104001	7.93341	0.00045	0.0058	// B5DGJ1 // B5XFH8 // B5X8M1 // B5X9F8 // B5RI58	// C0HAE1 // A0A1S3R8B9 // A0A1S3LQ86 // A0A1S3MNH3 // B5X441 // Q8QG64 // B5X9F8 // C0HAC0 // B5X9F6 // A0A1S3SQJ0 // A0A1S3RTF5 // A0A1S3PEA1 // A0A1S3MU50 // B5RI58 // B5X8M1 // B5XD75 // A0A1S3MN76 // B5X8K2 // B5X132 // A0A1S3RAU0 // A0A1S3SUY4 // A0A1S3MNF0 // B5X867 // A0A1S3KIJ1 // A0A1S3KIH4 // A0A1S3RUR3 // B9ENB8 // C0PU68 // A0A1S3MN35 // A0A1S3N6E2 // B5X5A1 // A0A1S3RV18 // A0A1S3NB…
GO:0043161	BP	proteasomal ubiquitin-dependent protein catabolic process	5	606	0.825083	68	65384	0.104001	7.93341	0.00045	0.0058	// B5DGJ1 // B5XFH8 // B5X8M1 // B5X9F8 // B5RI58	// C0HAE1 // A0A1S3R8B9 // A0A1S3LQ86 // A0A1S3MNH3 // B5X441 // Q8QG64 // B5X9F8 // C0HAC0 // B5X9F6 // A0A1S3SQJ0 // A0A1S3RTF5 // A0A1S3PEA1 // A0A1S3MU50 // B5RI58 // B5X8M1 // B5XD75 // A0A1S3MN76 // B5X8K2 // B5X132 // A0A1S3RAU0 // A0A1S3SUY4 // A0A1S3MNF0 // B5X867 // A0A1S3KIJ1 // A0A1S3KIH4 // A0A1S3RUR3 // B9ENB8 // C0PU68 // A0A1S3MN35 // A0A1S3N6E2 // B5X5A1 // A0A1S3RV18 // A0A1S3NB…
GO:0005996	BP	monosaccharide metabolic process	23	606	3.79538	329	65384	0.503181	7.54277	2.2e-13	1.7e-11	// B9EPN0 // C0H9M4 // C0H7J1 // B5X0U6 // B5XB51 // I0J1J2 // I0J1J3 // C0H9I1 // C0HAA0 // B5X886 // K4J7W7 // B5DGL3 // B5XE59 // Q2A665 // B5X1B5 // B5X4R2 // B5DGQ7 // B5DGU0 // C0H9U3 // B5X0R8 // B5X3K2 // B9EM17 // B5DFX8	// A0A1S3NAG1 // B9EPN0 // A0A1S3MI30 // C0H7J1 // A0A1S3MZQ2 // B5X5Z9 // A0A1S3KU63 // A0A1S3NV54 // A0A1S3MFP2 // A0A1S3S1F2 // B5DGT9 // A0A1S3P206 // A0A1S3LSB6 // A0A1S3Q5S7 // C0H981 // B5X8G8 // C0HAA0 // B5XE29 // A0A1S3Q6S9 // B9EM22 // A0A1S3MYS2 // A0A1S3NBU4 // A0A1S3MKZ8 // B5XGF1 // A0A1S3NCF5 // B5X6U5 // A0A1S3NCF0 // B5X1S9 // A0A1S3PKB5 // A0A1S3SM83 // A0A1S3L341 // A0A1S3PW39…
GO:0006163	BP	purine nucleotide metabolic process	20	606	3.30033	288	65384	0.440475	7.49267	8.6e-12	4.8e-10	// B5X373 // B5XCJ8 // B5DGM5 // B5DGC9 // B5DFU2 // C0H9G2 // B5DGC6 // B5DG78 // C0HAG6 // C0H9X1 // B5XE35 // B5RI36 // B5X6S0 // B5X4D6 // B5XCA1 // B5XD97 // P68529 // B5XBZ7 // B5X195 // C0H976	// A0A1S3SRU1 // A0A1S3SRU0 // A0A1S3PSZ6 // A0A1S3T6P8 // A0A1S3P9I9 // A0A1S2X0C2 // A0A1S3SDV2 // A0A1S3NUH3 // C0H976 // B5X161 // A0A1S3NLU5 // A0A1S3NLU6 // B5XDF0 // A0A1S3PJU2 // A0A1S3MM17 // A0A1S3SEE0 // B5X5B0 // B5RIB1 // B5XBZ7 // A0A1S3Q7D0 // A0A1S3R6Y8 // A0A1S3PZF2 // B5X597 // A0A1S3S940 // A0A1S3MJE5 // A0A1S3PV85 // P68529 // B5DGC9 // B5DGC6 // A0A1S3Q0L4 // A0A1S3KPP8 // C0…
GO:0009168	BP	purine ribonucleoside monophosphate biosynthetic process	5	606	0.825083	72	65384	0.110119	7.49267	0.00058	0.0074	// B5X373 // B5XBZ7 // C0HAG6 // B5DFU2 // C0H976	// B5X373 // A0A1S3MIB4 // B5DGM3 // A0A1S3T6P8 // B5DGM4 // A0A1S3KP02 // A0A1S2X0C2 // A0A1S3S6A0 // A0A1S3S6A3 // A0A1S3MLX1 // C0HAG6 // A0A1S3LI77 // A0A1S3MM17 // A0A1S3KP88 // A0A1S3LCD4 // B5XBZ7 // A0A1S3MUM9 // A0A1S3LCD9 // A0A1S3R6Y8 // A0A1S3KQP2 // A0A1S3KRR8 // A0A1S3MJE5 // A0A1S3KU02 // A0A1S3PA63 // A0A1S3PA46 // A0A1S3KPP8 // B5X1N4 // A0A1S3LIP2 // A0A1S3SNP8 // B5DG43 // A0A1…
GO:0009127	BP	purine nucleoside monophosphate biosynthetic process	5	606	0.825083	72	65384	0.110119	7.49267	0.00058	0.0074	// B5X373 // B5XBZ7 // C0HAG6 // B5DFU2 // C0H976	// B5X373 // A0A1S3MIB4 // B5DGM3 // A0A1S3T6P8 // B5DGM4 // A0A1S3KP02 // A0A1S2X0C2 // A0A1S3S6A0 // A0A1S3S6A3 // A0A1S3MLX1 // C0HAG6 // A0A1S3LI77 // A0A1S3MM17 // A0A1S3KP88 // A0A1S3LCD4 // B5XBZ7 // A0A1S3MUM9 // A0A1S3LCD9 // A0A1S3R6Y8 // A0A1S3KQP2 // A0A1S3KRR8 // A0A1S3MJE5 // A0A1S3KU02 // A0A1S3PA63 // A0A1S3PA46 // A0A1S3KPP8 // B5X1N4 // A0A1S3LIP2 // A0A1S3SNP8 // B5DG43 // A0A1…
GO:0032271	BP	regulation of protein polymerization	7	606	1.15512	102	65384	0.156001	7.40452	5.2e-05	0.00094	// B5X4T2 // B5X2M7 // C0PU35 // B5X3R3 // C0HBN6 // C0H8S8 // B5DG56	// A0A1S3L0N8 // A0A1S3LEU6 // C0HBN3 // C0PUI5 // C0HBN6 // A0A1S3REW2 // A0A1S3PES9 // A0A1S3L112 // A0A1S3PES7 // A0A1S3P463 // A0A1S3RG96 // A0A1S3RBG3 // A0A1S3RJ34 // B9ELH8 // A0A1S3QSA1 // A0A1S3RJ33 // A0A1S3LEE2 // A0A1S3N1N6 // B5X5R2 // A0A1S3LUZ9 // B5X2M7 // A0A1S3P6B3 // A0A1S3QR64 // A0A1S3RJ29 // A0A1S3N6U5 // A0A1S3L0S3 // A0A1S3N4F3 // B5XDX4 // A0A1S3P1X7 // A0A1S3P6A2 // A0A1…
GO:0030833	BP	regulation of actin filament polymerization	7	606	1.15512	102	65384	0.156001	7.40452	5.2e-05	0.00094	// B5X4T2 // B5X2M7 // C0PU35 // B5X3R3 // C0HBN6 // C0H8S8 // B5DG56	// A0A1S3L0N8 // A0A1S3LEU6 // C0HBN3 // C0PUI5 // C0HBN6 // A0A1S3REW2 // A0A1S3PES9 // A0A1S3L112 // A0A1S3PES7 // A0A1S3P463 // A0A1S3RG96 // A0A1S3RBG3 // A0A1S3RJ34 // B9ELH8 // A0A1S3QSA1 // A0A1S3RJ33 // A0A1S3LEE2 // A0A1S3N1N6 // B5X5R2 // A0A1S3LUZ9 // B5X2M7 // A0A1S3P6B3 // A0A1S3QR64 // A0A1S3RJ29 // A0A1S3N6U5 // A0A1S3L0S3 // A0A1S3N4F3 // B5XDX4 // A0A1S3P1X7 // A0A1S3P6A2 // A0A1…
GO:0034404	BP	nucleobase, nucleoside and nucleotide biosynthetic process	5	606	0.825083	73	65384	0.111648	7.39003	0.00062	0.0077	// B5XBZ7 // B5DGF0 // C0HAG6 // B5DFU2 // B5X2Q5	// A0A1S3S795 // A0A1S3PSZ6 // A0A1S3LGW9 // A0A1S3MIB4 // A0A1S3LI38 // A0A1S3SLE9 // B5X5J2 // C0HAG6 // A0A1S3MM17 // A0A1S3PMN3 // A0A1S3LCD4 // A0A1S3QMQ1 // A0A1S3KJA5 // A0A1S3MUM9 // A0A1S3NWR5 // B9EPL6 // A0A1S3KQP2 // A0A1S3KRR8 // A0A1S3MJE5 // A0A1S3LCD9 // A0A1S3MAM8 // B5DFU2 // A0A1S3MG06 // A0A1S3Q918 // A0A1S3KPP8 // A0A1S3SLG3 // A0A1S3S8T2 // A0A1S3SL77 // B5X2W8 // B5X2Q5 // …
GO:0034654	BP	nucleobase, nucleoside, nucleotide and nucleic acid biosynthetic process	5	606	0.825083	73	65384	0.111648	7.39003	0.00062	0.0077	// B5XBZ7 // B5DGF0 // C0HAG6 // B5DFU2 // B5X2Q5	// A0A1S3S795 // A0A1S3PSZ6 // A0A1S3LGW9 // A0A1S3MIB4 // A0A1S3LI38 // A0A1S3SLE9 // B5X5J2 // C0HAG6 // A0A1S3MM17 // A0A1S3PMN3 // A0A1S3LCD4 // A0A1S3QMQ1 // A0A1S3KJA5 // A0A1S3MUM9 // A0A1S3NWR5 // B9EPL6 // A0A1S3KQP2 // A0A1S3KRR8 // A0A1S3MJE5 // A0A1S3LCD9 // A0A1S3MAM8 // B5DFU2 // A0A1S3MG06 // A0A1S3Q918 // A0A1S3KPP8 // A0A1S3SLG3 // A0A1S3S8T2 // A0A1S3SL77 // B5X2W8 // B5X2Q5 // …
GO:0006323	BP	DNA packaging	6	606	0.990099	88	65384	0.13459	7.35644	0.00018	0.0026	// B9ELQ9 // B9ELD5 // B9EN25 // B5X1W1 // B5DFV7 // P84408	// A0A1S3N062 // A0A1S3MY44 // A0A1S3P8H1 // A0A1S3SIT2 // B5X351 // B5DGT6 // P84408 // B5DGT5 // A0A1S3SU36 // A0A1S3PIB9 // A0A1S3PIB4 // A0A1S3SGF7 // A0A1S3SGF8 // A0A1S3MGB8 // B9EPV8 // A0A1S3RN22 // A0A1S3SU29 // A0A1S3KMF4 // A0A1S3NNX3 // A0A1S3LER8 // A0A1S3KL37 // A0A1S3PIC6 // A0A1S3KL38 // A0A1S3PFL3 // A0A1S3PJ20 // A0A1S3PG66 // C0H9G7 // A0A1S3SU55 // A0A1S3RPW5 // A0A1S3LLR0 // …
GO:0019318	BP	hexose metabolic process	20	606	3.30033	299	65384	0.457298	7.21702	1.7e-11	8.6e-10	// B5DGL3 // B5DFX8 // B9EPN0 // C0H9M4 // Q2A665 // K4J7W7 // B5XE59 // B9EM17 // B5X1B5 // B5X0R8 // B5DGQ7 // B5X0U6 // B5XB51 // B5DGU0 // C0H9U3 // I0J1J3 // C0H9I1 // C0HAA0 // I0J1J2 // B5X3K2	// A0A1S3NAG1 // B9EPN0 // A0A1S3MI30 // A0A1S3MZQ2 // B5X5Z9 // A0A1S3KU63 // A0A1S3NV54 // A0A1S3MFP2 // A0A1S3S1F2 // B5DGT9 // A0A1S3P206 // A0A1S3LSB6 // A0A1S3Q5S7 // C0H981 // B5RIA1 // C0HAA0 // B5XE29 // A0A1S3Q6S9 // B9EM22 // A0A1S3MYS2 // A0A1S3NBU4 // A0A1S3MKZ8 // B5XGF1 // A0A1S3NCF5 // B5X6U5 // A0A1S3NCF0 // A0A1S3PKB5 // A0A1S3L341 // A0A1S3PW39 // A0A1S3LCS4 // A0A1S3KPC9 // A0…
GO:0032272	BP	negative regulation of protein polymerization	6	606	0.990099	90	65384	0.137648	7.19296	0.00021	0.0028	// B5X2M7 // C0PU35 // B5X3R3 // C0HBN6 // C0H8S8 // B5DG56	// A0A1S3L0N8 // A0A1S3LEU6 // C0HBN3 // C0PUI5 // C0HBN6 // A0A1S3REW2 // A0A1S3PES9 // A0A1S3L112 // A0A1S3PES7 // A0A1S3P463 // A0A1S3RG96 // A0A1S3RJ34 // B9ELH8 // A0A1S3QSA1 // A0A1S3RJ33 // A0A1S3LEE2 // A0A1S3N1N6 // B5X2M7 // A0A1S3P6B3 // A0A1S3QR64 // A0A1S3RJ29 // A0A1S3N6U5 // A0A1S3L0S3 // A0A1S3N4F3 // A0A1S3P1X7 // A0A1S3P6A2 // A0A1S3KMV4 // A0A1S3REQ1 // A0A1S3SD33 // A0A1S3SD32…
GO:0030837	BP	negative regulation of actin filament polymerization	6	606	0.990099	90	65384	0.137648	7.19296	0.00021	0.0028	// B5X2M7 // C0PU35 // B5X3R3 // C0HBN6 // C0H8S8 // B5DG56	// A0A1S3L0N8 // A0A1S3LEU6 // C0HBN3 // C0PUI5 // C0HBN6 // A0A1S3REW2 // A0A1S3PES9 // A0A1S3L112 // A0A1S3PES7 // A0A1S3P463 // A0A1S3RG96 // A0A1S3RJ34 // B9ELH8 // A0A1S3QSA1 // A0A1S3RJ33 // A0A1S3LEE2 // A0A1S3N1N6 // B5X2M7 // A0A1S3P6B3 // A0A1S3QR64 // A0A1S3RJ29 // A0A1S3N6U5 // A0A1S3L0S3 // A0A1S3N4F3 // A0A1S3P1X7 // A0A1S3P6A2 // A0A1S3KMV4 // A0A1S3REQ1 // A0A1S3SD33 // A0A1S3SD32…
GO:0006412	BP	translation	56	606	9.24092	845	65384	1.29237	7.1504	1.2e-28	2e-25	// B5DGK7 // C0H7H1 // B9EMI7 // B5DGV2 // B5DGV3 // B5X7I1 // B5DGA8 // B5DGX5 // A7KIL2 // B5DGX3 // B5X8X3 // B5DGX1 // B5X771 // B9ELK0 // C0H9I7 // B9ENH4 // C0H7G0 // B9EL07 // B5XFQ0 // B5X5S8 // B5XDA7 // B5XG87 // C0H7M0 // B5DG02 // B5DG42 // B5X7R3 // B5XGU1 // B5X1G4 // B5X668 // B5DGY4 // C0H8L1 // B5DGW8 // B5X369 // C0H8L4 // C0H779 // C0H8D1 // B5X6R2 // C0PUL2 // B5DGK9 // B5XG35…	// B9EPU0 // A0A1S3Q570 // B9EQB9 // C0H7J7 // A0A1S3QPN9 // A0A1S3N6S7 // A0A1S3RR63 // B5X8V1 // B5XC98 // B5RI65 // B5X9J1 // B5X7S7 // A0A1S3Q8P8 // B5XC93 // C0H8C7 // A0A1S3PT98 // B5X599 // A0A1S3SLS0 // B5X7J4 // B5X610 // C0H7M1 // C0H7M0 // B5DG02 // B5DG01 // B5X841 // B5X840 // C0H7M9 // A0A1S3MUA7 // A0A1S3MSB2 // B5XCH8 // B5DGL2 // B5DGL6 // A0A1S3R084 // B5DGL8 // B5X369 // A0A1S3…
GO:0043254	BP	regulation of protein complex assembly	7	606	1.15512	106	65384	0.162119	7.1251	6.7e-05	0.0011	// B5X4T2 // B5X2M7 // C0PU35 // B5X3R3 // C0HBN6 // C0H8S8 // B5DG56	// A0A1S3L0N8 // A0A1S3L865 // A0A1S3LEU6 // C0HBN3 // C0PUI5 // C0HBN6 // A0A1S3REW2 // A0A1S3PES9 // A0A1S3L112 // A0A1S3PES7 // A0A1S3P463 // A0A1S3RG96 // A0A1S3RBG3 // A0A1S3RJ34 // B9ELH8 // A0A1S3QSA1 // A0A1S3RJ33 // A0A1S3LEE2 // A0A1S3N1N6 // B5X5R2 // A0A1S3LUZ9 // B5X2M7 // A0A1S3P6B3 // A0A1S3QR64 // A0A1S3RJ29 // A0A1S3N6U5 // A0A1S3L0S3 // A0A1S3N4F3 // B5XDX4 // A0A1S3P1X7 // A0A1…
GO:0006164	BP	purine nucleotide biosynthetic process	18	606	2.9703	273	65384	0.417533	7.11392	2.1e-10	9.3e-09	// B5X373 // B5XCJ8 // B5DGM5 // B5DGC9 // B5DFU2 // C0H9G2 // B5DGC6 // B5DG78 // C0HAG6 // B5XE35 // B5RI36 // B5X6S0 // B5X4D6 // B5XCA1 // P68529 // B5XBZ7 // B5X195 // C0H976	// A0A1S3SRU1 // A0A1S3SRU0 // A0A1S3PSZ6 // A0A1S3T6P8 // A0A1S3P9I9 // A0A1S2X0C2 // A0A1S3NUH3 // C0H976 // B5XGG0 // A0A1S3NLU5 // A0A1S3NLU6 // B5XDF0 // A0A1S3PJU2 // A0A1S3MM17 // B5X5B0 // B5RIB1 // B5XBZ7 // A0A1S3R6Y8 // A0A1S3PZF2 // B5X597 // A0A1S3S940 // A0A1S3MJE5 // A0A1S3PV85 // P68529 // B5DGC9 // B5DGC6 // A0A1S3Q0L4 // A0A1S3KPP8 // C0H9G2 // A0A1S3NZP4 // C0H715 // A0A1S3RMI6…
GO:0043094	BP	cellular metabolic compound salvage	5	606	0.825083	76	65384	0.116236	7.09832	0.00075	0.0091	// B5X1E5 // B5DGF0 // B5X2Q5 // B5DFU2 // B5XBZ7	// A0A1S3S795 // C0HBP7 // A0A1S3LGW9 // A0A1S3MR49 // A0A1S3LT56 // A0A1S3LI38 // B5X1E5 // A0A1S3SLE9 // B5X5J2 // A0A1S3PSZ6 // A0A1S3MFZ7 // A0A1S2X034 // A0A1S3MM17 // A0A1S3SN19 // A0A1S3PMN3 // A0A1S3LCD4 // A0A1S3KJA5 // A0A1S3LCD9 // B9EPL6 // B5X277 // A0A1S3PMN8 // A0A1S3KQP2 // A0A1S3KRR8 // A0A1S3MJE5 // A0A1S3KU02 // B5DFU2 // A0A1S3MG06 // D0QYP9 // A0A1S3Q918 // A0A1S3KPP8 // B5X2…
GO:0031333	BP	negative regulation of protein complex assembly	6	606	0.990099	94	65384	0.143766	6.88688	0.00026	0.0035	// B5X2M7 // C0PU35 // B5X3R3 // C0HBN6 // C0H8S8 // B5DG56	// A0A1S3L0N8 // A0A1S3L865 // A0A1S3LEU6 // C0HBN3 // C0PUI5 // C0HBN6 // A0A1S3REW2 // A0A1S3PES9 // A0A1S3L112 // A0A1S3PES7 // A0A1S3P463 // A0A1S3RG96 // A0A1S3RJ34 // B9ELH8 // A0A1S3QSA1 // A0A1S3RJ33 // A0A1S3LEE2 // A0A1S3N1N6 // B5X2M7 // A0A1S3P6B3 // A0A1S3QR64 // A0A1S3RJ29 // A0A1S3N6U5 // A0A1S3L0S3 // A0A1S3N4F3 // A0A1S3P1X7 // A0A1S3P6A2 // A0A1S3KMV4 // A0A1S3REQ1 // A0A1S3L883…
GO:0051693	BP	actin filament capping	5	606	0.825083	80	65384	0.122354	6.7434	0.00094	0.011	// C0H8S8 // B5X3R3 // C0HBN6 // C0PU35 // B5DG56	// A0A1S3SJ73 // A0A1S3SJ72 // A0A1S3NR94 // A0A1S3QIH0 // A0A1S3LBW6 // A0A1S3QMX2 // A0A1S3PLD0 // A0A1S3QBV3 // A0A1S3L0S3 // A0A1S3RJ29 // A0A1S3N4F3 // A0A1S3N6U5 // A0A1S3LEU6 // B5X2H9 // A0A1S3LB19 // B5DFV1 // A0A1S3N4L6 // A0A1S3KZK5 // C0PUI5 // C0HBN6 // A0A1S3PLL7 // A0A1S3SJ69 // A0A1S3REW2 // A0A1S3KMV4 // A0A1S3QU50 // A0A1S3N774 // A0A1S3SA45 // B5DFX6 // A0A1S3MZ74 // A0A1S3P1X7…
GO:0042254	BP	ribosome biogenesis	9	606	1.48515	146	65384	0.223296	6.65102	1.1e-05	0.00025	// B5X6J8 // B5DGB6 // B5X4Q1 // C0H8G4 // B5X4H4 // B5X300 // B5DG12 // B5XDP1 // C0HBE6	// A0A1S3NTH3 // B5X4Q1 // A0A1S3NX36 // A0A1S3M5F7 // A0A1S3L2M8 // A0A1S3P6R5 // A0A1S3PAK7 // A0A1S3RLG3 // B5XAY9 // A0A1S3KXI0 // B5DG89 // B5DGC7 // A0A1S3Q974 // B5XBF8 // A0A1S3PK44 // A0A1S3P3R0 // A0A1S3N1E6 // A0A1S3SJN0 // B5XEG4 // B5XB42 // A0A1S3RS46 // A0A1S3RZ57 // B5RIB2 // A0A1S3Q247 // A0A1S3LTE2 // A0A1S3M941 // A0A1S3RK33 // A0A1S3LTR2 // A0A1S3MPW0 // B5XA24 // B3TDD6 // B5…
GO:0030041	BP	actin filament polymerization	8	606	1.32013	130	65384	0.198825	6.63965	3.4e-05	0.0007	// B5X4T2 // B5X2M7 // C0PU35 // B5DGD5 // B5X3R3 // C0HBN6 // C0H8S8 // B5DG56	// A0A1S3L0N8 // B5X9U3 // A0A1S3LEU6 // C0HBN3 // C0PUI5 // C0HBN6 // A0A1S3REW2 // A0A1S3PES9 // A0A1S3L112 // B5XGN2 // B5X7J0 // A0A1S3L0K8 // A0A1S3PES7 // A0A1S3P463 // A0A1S3RG96 // A0A1S3PRY0 // A0A1S3RBG3 // B5X7L8 // A0A1S3RJ34 // B9ELH8 // A0A1S3QSA1 // A0A1S3RJ33 // A0A1S3LEE2 // A0A1S3N1N6 // B5X5R2 // A0A1S3LUZ9 // B5X2M7 // A0A1S3P6B3 // B5DGD5 // A0A1S3QR64 // A0A1S3RJ29 // A0A1S3…
GO:0009161	BP	ribonucleoside monophosphate metabolic process	7	606	1.15512	117	65384	0.178943	6.45522	0.00012	0.0018	// B5X373 // B5DGM5 // C0H976 // B5DFU2 // C0HAG6 // B5XCA1 // B5XBZ7	// A0A1S3S795 // A0A1S3PSZ6 // A0A1S3T6P8 // A0A1S2X0C2 // A0A1S3LI38 // A0A1S3MM17 // A0A1S3KJA5 // A0A1S3R6Y8 // A0A1S3PZF2 // A0A1S3MJE5 // A0A1S3P9N1 // A0A1S3P9I9 // A0A1S3MG06 // A0A1S3KPP8 // A0A1S3MIB4 // A0A1S3LIL6 // A0A1S3MM09 // C0HBQ0 // C0H8Y0 // A0A1S3LJF5 // A0A1S3LDC9 // A0A1S3LTE0 // A0A1S3KQW3 // A0A1S3P423 // A0A1S3KJJ6 // A0A1S3L167 // A0A1S3KP88 // A0A1S3RIB2 // B5X373 // B5…
GO:0006413	BP	translational initiation	5	606	0.825083	85	65384	0.130001	6.34673	0.0012	0.015	// B5DGH9 // C0H9I7 // B9ENG2 // B9ENH4 // C0H9S0	// B9ENG2 // A0A1S3QGA7 // A0A1S3SLQ1 // A0A1S3PT98 // A0A1S3M5J6 // A0A1S3M5K0 // A0A1S3N9K6 // A0A1S3M509 // B5DGQ2 // A0A1S3N267 // A0A1S3NHU9 // A0A1S3QSD2 // B5X5X0 // B5DGH9 // A0A1S3RAF8 // C0H8R1 // A0A1S3NAK1 // B5X0W4 // C0H9I7 // B5XFP4 // A0A1S3M5U4 // A0A1S3RRZ4 // B5X5E1 // A0A1S3SF32 // C0HB77 // B5XF41 // A0A1S3NAJ6 // B5XA72 // B5DGE1 // B9ENH4 // A0A1S3M504 // A0A1S3PDN7 // A0A1…
GO:0022613	BP	ribonucleoprotein complex biogenesis	16	606	2.64026	276	65384	0.422122	6.25475	1.3e-08	4.2e-07	// B5X6J8 // B5X4Q1 // B5DGB6 // C0HBE6 // B9ENG2 // C0H8G4 // B5XB66 // B5DGH9 // B5X4H4 // B5X300 // B5DG12 // B5XDP1 // C0H9I7 // B9ENH4 // B5X6H9 // C0H9S0	// B5X9U7 // A0A1S3L719 // B5X4Q1 // A0A1S3R855 // B5DGK2 // A0A1S3PT98 // A0A1S3NX36 // A0A1S3M660 // A0A1S3NHU9 // A0A1S3M5F7 // A0A1S3L2M8 // C0HAZ6 // A0A1S3T062 // A0A1S3P6R5 // A0A1S3T039 // A0A1S3PAK7 // B5RIB2 // B5XD06 // A0A1S3RLG3 // B5XAY9 // A0A1S3KXI0 // B5DG89 // B5DGC7 // A0A1S3L589 // A0A1S3LV16 // B5XGF4 // A0A1S3QL22 // B5X300 // B5XBF8 // A0A1S3NZP1 // A0A1S3L5D2 // A0A1S3MD25…
GO:0009119	BP	ribonucleoside metabolic process	7	606	1.15512	121	65384	0.185061	6.24182	0.00015	0.0022	// B5XCJ8 // B5DFU2 // B5DGC6 // B5XE35 // B5DGF0 // B5X2Q5 // B5XBZ7	// A0A1S3S795 // A0A1S3RMY7 // A0A1S3PAS6 // A0A1S3LT56 // A0A1S3LI38 // B5X5J2 // A0A1S3R5N6 // A0A1S3MM17 // A0A1S3KJA5 // C0H8K5 // A0A1S3KZ43 // B5X4W4 // A0A1S3PWI0 // A0A1S3MG06 // B5DGC6 // A0A1S3KPP8 // A0A1S3SLG3 // C0H9E7 // B5XCD3 // A0A1S3SUT6 // B5XAW0 // C0HBQ0 // A0A1S3QS03 // B5XE35 // C0H8Q7 // A0A1S3SBG2 // A0A1S3SBG4 // A0A1S3P3G3 // C0H9B7 // A0A1S3SLF0 // B5XD88 // A0A1S3NDH8…
GO:0030042	BP	actin filament depolymerization	7	606	1.15512	122	65384	0.18659	6.19066	0.00016	0.0023	// B5DGL1 // C0PU35 // B5X3R3 // B9ELH2 // C0HBN6 // C0H8S8 // B5DG56	// A0A1S3L0N8 // A0A1S3P571 // A0A1S3LEU6 // C0PUI5 // C0HBN6 // A0A1S3REW2 // A0A1S3PYF7 // A0A1S3PYF5 // A0A1S3LAT8 // A0A1S3L112 // A0A1S3R029 // B9EPC3 // A0A1S3PES7 // A0A1S3NDX3 // B5DGL1 // A0A1S3RG96 // A0A1S3MK72 // A0A1S3QNW0 // B5X8Y0 // A0A1S3RJ34 // A0A1S3QSA1 // A0A1S3RJ33 // B9ELH2 // A0A1S3LEE2 // A0A1S3N1N6 // A0A1S3PYG2 // B5XC25 // M4V3K3 // A0A1S3LKB4 // B9EM12 // A0A1S3PZV2 /…
GO:0043241	BP	protein complex disassembly	8	606	1.32013	140	65384	0.21412	6.16539	5.7e-05	0.00099	// B5DGL1 // B9EL07 // C0PU35 // B5X3R3 // B9ELH2 // C0HBN6 // C0H8S8 // B5DG56	// A0A1S3L0N8 // A0A1S3P571 // B9ELX6 // A0A1S3R947 // A0A1S3LEU6 // B9EMV4 // C0PUI5 // C0HBN6 // A0A1S3REW2 // A0A1S3PYF7 // A0A1S3PYF5 // A0A1S3KSP7 // A0A1S3LAT8 // A0A1S3L112 // A0A1S3R029 // B9EPC3 // A0A1S3PES7 // A0A1S3NDX3 // B5DGL1 // A0A1S3RG96 // A0A1S3MK72 // A0A1S3QNW0 // B5X8Y0 // A0A1S3RJ34 // A0A1S3QSA1 // A0A1S3RJ33 // B9ELH2 // A0A1S3LEE2 // A0A1S3N1N6 // A0A1S3PYG2 // B5XC25 /…
GO:0043624	BP	cellular protein complex disassembly	8	606	1.32013	140	65384	0.21412	6.16539	5.7e-05	0.00099	// B5DGL1 // B9EL07 // C0PU35 // B5X3R3 // B9ELH2 // C0HBN6 // C0H8S8 // B5DG56	// A0A1S3L0N8 // A0A1S3P571 // B9ELX6 // A0A1S3R947 // A0A1S3LEU6 // B9EMV4 // C0PUI5 // C0HBN6 // A0A1S3REW2 // A0A1S3PYF7 // A0A1S3PYF5 // A0A1S3KSP7 // A0A1S3LAT8 // A0A1S3L112 // A0A1S3R029 // B9EPC3 // A0A1S3PES7 // A0A1S3NDX3 // B5DGL1 // A0A1S3RG96 // A0A1S3MK72 // A0A1S3QNW0 // B5X8Y0 // A0A1S3RJ34 // A0A1S3QSA1 // A0A1S3RJ33 // B9ELH2 // A0A1S3LEE2 // A0A1S3N1N6 // A0A1S3PYG2 // B5XC25 /…
GO:0034623	BP	cellular macromolecular complex disassembly	8	606	1.32013	141	65384	0.215649	6.12167	6e-05	0.001	// B5DGL1 // B9EL07 // C0PU35 // B5X3R3 // B9ELH2 // C0HBN6 // C0H8S8 // B5DG56	// A0A1S3L0N8 // A0A1S3P571 // B9ELX6 // A0A1S3R947 // A0A1S3LEU6 // B9EMV4 // C0PUI5 // C0HBN6 // A0A1S3REW2 // A0A1S3PYF7 // A0A1S3PYF5 // A0A1S3KSP7 // A0A1S3LAT8 // A0A1S3L112 // A0A1S3R029 // B9EPC3 // A0A1S3PES7 // A0A1S3NDX3 // B5DGL1 // A0A1S3RG96 // A0A1S3MK72 // A0A1S3QNW0 // B5X8Y0 // A0A1S3RJ34 // A0A1S3QSA1 // A0A1S3RJ33 // B9ELH2 // A0A1S3LEE2 // A0A1S3N1N6 // A0A1S3PYG2 // B5XC25 /…
GO:0032984	BP	macromolecular complex disassembly	8	606	1.32013	141	65384	0.215649	6.12167	6e-05	0.001	// B5DGL1 // B9EL07 // C0PU35 // B5X3R3 // B9ELH2 // C0HBN6 // C0H8S8 // B5DG56	// A0A1S3L0N8 // A0A1S3P571 // B9ELX6 // A0A1S3R947 // A0A1S3LEU6 // B9EMV4 // C0PUI5 // C0HBN6 // A0A1S3REW2 // A0A1S3PYF7 // A0A1S3PYF5 // A0A1S3KSP7 // A0A1S3LAT8 // A0A1S3L112 // A0A1S3R029 // B9EPC3 // A0A1S3PES7 // A0A1S3NDX3 // B5DGL1 // A0A1S3RG96 // A0A1S3MK72 // A0A1S3QNW0 // B5X8Y0 // A0A1S3RJ34 // A0A1S3QSA1 // A0A1S3RJ33 // B9ELH2 // A0A1S3LEE2 // A0A1S3N1N6 // A0A1S3PYG2 // B5XC25 /…
GO:0051258	BP	protein polymerization	8	606	1.32013	142	65384	0.217179	6.07856	6.3e-05	0.001	// B5X4T2 // B5X2M7 // C0PU35 // B5DGD5 // B5X3R3 // C0HBN6 // C0H8S8 // B5DG56	// A0A1S3L0N8 // B5X9U3 // A0A1S3MLZ0 // A0A1S3LEU6 // A0A1S3RF10 // C0HBN3 // C0PUI5 // C0HBN6 // A0A1S3REW2 // A0A1S3PES9 // A0A1S3L112 // B5XGN2 // B5X7J0 // A0A1S3L0K8 // A0A1S3PES7 // A0A1S3P463 // A0A1S3RG96 // A0A1S3PRY0 // A0A1S3RBG3 // B5X7L8 // A0A1S3RJ34 // B9ELH8 // A0A1S3QSA1 // A0A1S3RJ33 // B9EML2 // A0A1S3LEE2 // A0A1S3N1N6 // B5X5R2 // A0A1S3LUZ9 // B5X2M7 // A0A1S3P6B3 // B5DGD5…
GO:0022618	BP	ribonucleoprotein complex assembly	9	606	1.48515	160	65384	0.244708	6.06906	2.3e-05	0.00047	// B5X6J8 // B5DGB6 // B9ENG2 // B5XB66 // B5DGH9 // C0H9I7 // B9ENH4 // B5X6H9 // C0H9S0	// B5X9U7 // A0A1S3R855 // B5DGK2 // A0A1S3PT98 // A0A1S3M660 // A0A1S3NHU9 // C0HAZ6 // A0A1S3KRY4 // A0A1S3NH18 // A0A1S3T039 // A0A1S3RCT0 // B5XD06 // A0A1S3NR24 // B5XBB1 // A0A1S3L589 // B5XGF4 // A0A1S3NZP5 // A0A1S3NZP1 // A0A1S3L5D2 // A0A1S3MD25 // A0A1S3PN12 // A0A1S3NBL2 // B5XEP8 // B5X7Y0 // A0A1S3LHV3 // A0A1S3QK15 // A0A1S3QL22 // A0A1S3RT52 // A0A1S3M941 // B5XBE7 // A0A1S3LFC2 /…
GO:0030835	BP	negative regulation of actin filament depolymerization	5	606	0.825083	89	65384	0.136119	6.06148	0.0015	0.017	// C0H8S8 // B5X3R3 // C0HBN6 // C0PU35 // B5DG56	// A0A1S3L0N8 // A0A1S3P571 // A0A1S3LEU6 // C0PUI5 // C0HBN6 // A0A1S3REW2 // A0A1S3PES9 // A0A1S3L112 // A0A1S3PES7 // A0A1S3P463 // A0A1S3RG96 // A0A1S3RJ34 // A0A1S3QSA1 // A0A1S3RJ33 // A0A1S3LEE2 // A0A1S3N1N6 // B5XCV7 // A0A1S3LAU1 // A0A1S3RJ29 // A0A1S3N6U5 // A0A1S3L0S3 // A0A1S3N4F3 // A0A1S3P1X7 // A0A1S3P5C0 // A0A1S3KMV4 // A0A1S3REQ1 // A0A1S3SD33 // A0A1S3SD32 // B5XC30 // A0A1S3…
GO:0008064	BP	regulation of actin polymerization or depolymerization	7	606	1.15512	127	65384	0.194237	5.94693	0.00021	0.0028	// B5X4T2 // B5X2M7 // C0PU35 // B5X3R3 // C0HBN6 // C0H8S8 // B5DG56	// A0A1S3L0N8 // A0A1S3P571 // A0A1S3LEU6 // C0HBN3 // C0PUI5 // C0HBN6 // A0A1S3REW2 // A0A1S3PYF7 // A0A1S3PYF5 // A0A1S3LAT8 // A0A1S3L112 // A0A1S3R029 // B9EPC3 // A0A1S3PES7 // A0A1S3P463 // A0A1S3RG96 // A0A1S3RBG3 // A0A1S3QNW0 // A0A1S3QWT7 // A0A1S3RJ34 // B9ELH8 // A0A1S3QSA1 // A0A1S3RJ33 // A0A1S3LEE2 // A0A1S3N1N6 // A0A1S3PYG2 // B5X5R2 // A0A1S3LUZ9 // B5X2M7 // A0A1S3P6B3 // A0A1…
GO:0030832	BP	regulation of actin filament length	7	606	1.15512	127	65384	0.194237	5.94693	0.00021	0.0028	// B5X4T2 // B5X2M7 // C0PU35 // B5X3R3 // C0HBN6 // C0H8S8 // B5DG56	// A0A1S3L0N8 // A0A1S3P571 // A0A1S3LEU6 // C0HBN3 // C0PUI5 // C0HBN6 // A0A1S3REW2 // A0A1S3PYF7 // A0A1S3PYF5 // A0A1S3LAT8 // A0A1S3L112 // A0A1S3R029 // B9EPC3 // A0A1S3PES7 // A0A1S3P463 // A0A1S3RG96 // A0A1S3RBG3 // A0A1S3QNW0 // A0A1S3QWT7 // A0A1S3RJ34 // B9ELH8 // A0A1S3QSA1 // A0A1S3RJ33 // A0A1S3LEE2 // A0A1S3N1N6 // A0A1S3PYG2 // B5X5R2 // A0A1S3LUZ9 // B5X2M7 // A0A1S3P6B3 // A0A1…
GO:0071103	BP	DNA conformation change	6	606	0.990099	110	65384	0.168237	5.88515	0.00061	0.0077	// B9ELQ9 // B9ELD5 // B9EN25 // B5X1W1 // B5DFV7 // P84408	// A0A1S3LLD4 // A0A1S3N062 // A0A1S3Q079 // A0A1S3MY44 // A0A1S3Q077 // A0A1S3P8H1 // A0A1S3SIT2 // B5X351 // B5DGT6 // P84408 // B5DGT5 // A0A1S3SU36 // A0A1S3KN29 // A0A1S3PIB9 // A0A1S3PIB4 // A0A1S3SGF7 // A0A1S3SGF8 // A0A1S3MGB8 // B9EPV8 // A0A1S3RN22 // A0A1S3SU29 // A0A1S3KMF4 // A0A1S3NNX3 // A0A1S3LER8 // A0A1S3KL37 // A0A1S3M4R9 // A0A1S3PIC6 // A0A1S3KL38 // A0A1S3PFL3 // A0A1S3KJX7…
GO:0022411	BP	cellular component disassembly	8	606	1.32013	147	65384	0.224826	5.8718	8.1e-05	0.0013	// B5DGL1 // B9EL07 // C0PU35 // B5X3R3 // B9ELH2 // C0HBN6 // C0H8S8 // B5DG56	// A0A1S3L0N8 // A0A1S3P571 // B9ELX6 // A0A1S3R947 // A0A1S3LEU6 // B9EMV4 // C0PUI5 // C0HBN6 // A0A1S3REW2 // A0A1S3PYF7 // A0A1S3PYF5 // A0A1S3KSP7 // A0A1S3LAT8 // A0A1S3L112 // A0A1S3R029 // B9EPC3 // A0A1S3PES7 // A0A1S3NDX3 // B5DGL1 // A0A1S3RG96 // A0A1S3MK72 // A0A1S3QNW0 // A0A1S3QWT7 // A0A1S3RJ34 // A0A1S3QSA1 // A0A1S3RJ33 // B9ELH2 // A0A1S3LEE2 // A0A1S3N1N6 // A0A1S3PYG2 // B5XC…
GO:0051494	BP	negative regulation of cytoskeleton organization	6	606	0.990099	112	65384	0.171296	5.78006	0.00067	0.0082	// B5X2M7 // C0PU35 // B5X3R3 // C0HBN6 // C0H8S8 // B5DG56	// A0A1S3L0N8 // A0A1S3P571 // B5XBV0 // A0A1S3LEU6 // C0HBN3 // C0PUI5 // C0HBN6 // A0A1S3REW2 // A0A1S3KSP7 // A0A1S3LAT8 // A0A1S3L112 // B5X7J3 // A0A1S3QIM3 // A0A1S3PES7 // A0A1S3P463 // A0A1S3RG96 // A0A1S3NSW4 // A0A1S3RJ34 // B9ELH8 // A0A1S3QSA1 // A0A1S3RJ33 // A0A1S3LEE2 // A0A1S3N1N6 // A0A1S3KSV5 // B5X2M7 // A0A1S3P6B3 // B5XCV7 // A0A1S3LAU1 // A0A1S3RJ29 // A0A1S3N6U5 // A0A1S3L0…
GO:0065004	BP	protein-DNA complex assembly	6	606	0.990099	112	65384	0.171296	5.78006	0.00067	0.0082	// B9ELQ9 // B9ELD5 // B9EN25 // B5X1W1 // B5DFV7 // P84408	// A0A1S3LLD4 // A0A1S3RWH3 // A0A1S3P8H1 // A0A1S3SIT2 // B5X351 // B5DGT6 // P84408 // B5DGT5 // A0A1S3SU36 // A0A1S3PIB9 // A0A1S3RJB7 // A0A1S3PIB4 // A0A1S3MGB8 // B9EPV8 // A0A1S3SU29 // A0A1S3LER8 // A0A1S3KL37 // B5XC29 // A0A1S3PIC6 // A0A1S3Q0V4 // A0A1S3Q0M0 // A0A1S3PFL3 // B5XD83 // A0A1S3MBZ4 // B5X9Z1 // A0A1S3KJX7 // A0A1S3LWT9 // A0A1S3PG66 // A0A1S3KV15 // A0A1S3PPA5 // A0A1S3SU…
GO:0006091	BP	generation of precursor metabolites and energy	26	606	4.29043	486	65384	0.743301	5.77213	3e-12	1.9e-10	// C0H9M4 // P68529 // Q2A665 // B5X6S0 // B5X0U6 // B5XB51 // I0J1J2 // I0J1J3 // C0H9I1 // B5DGC9 // C0H820 // B5DGL3 // B5X767 // B5RI36 // B5DGQ7 // B9EMN2 // B5DGU0 // B5X1B5 // B5DGS2 // B5XAM9 // B5X0R8 // B5X3K2 // B5DG78 // B5X0X6 // B5X195 // B5DFX8	// A0A1S3NAG1 // A0A1S3LFV3 // B5XB51 // A0A1S3LSB6 // A0A1S3MIZ7 // B5X9J7 // B5XE29 // B5X597 // A0A1S3PFE0 // A0A1S5RRP6 // A0A1S5RRP5 // B5X8U4 // A0A1S6XUV8 // M4VHK7 // B5DGL3 // A0A1S3LGZ3 // A0A1S3NHE7 // A0A1S3S970 // B5X3K2 // A0A1S3PV75 // A0A1S3MIQ1 // U5Y4W0 // B5X7T2 // C8Z1W0 // B5X0X6 // A0A0F6NW24 // A0A1S3R8S7 // A0A1S3SII5 // A0A1S3RQN1 // I6NYB8 // B5RI87 // B5XAD3 // B5XFL4 /…
GO:0051261	BP	protein depolymerization	7	606	1.15512	131	65384	0.200355	5.76535	0.00025	0.0033	// B5DGL1 // C0PU35 // B5X3R3 // B9ELH2 // C0HBN6 // C0H8S8 // B5DG56	// A0A1S3L0N8 // A0A1S3P571 // B9ELX6 // A0A1S3LEU6 // C0PUI5 // C0HBN6 // A0A1S3REW2 // A0A1S3PYF7 // A0A1S3PYF5 // A0A1S3KSP7 // A0A1S3LAT8 // A0A1S3L112 // A0A1S3R029 // B9EPC3 // A0A1S3PES7 // A0A1S3NDX3 // B5DGL1 // A0A1S3RG96 // A0A1S3MK72 // A0A1S3QNW0 // B5X8Y0 // A0A1S3RJ34 // A0A1S3QSA1 // A0A1S3RJ33 // B9ELH2 // A0A1S3LEE2 // A0A1S3N1N6 // A0A1S3PYG2 // B5XC25 // M4V3K3 // A0A1S3KSV5 /…
GO:0043242	BP	negative regulation of protein complex disassembly	5	606	0.825083	94	65384	0.143766	5.73906	0.0019	0.021	// C0H8S8 // B5X3R3 // C0HBN6 // C0PU35 // B5DG56	// A0A1S3L0N8 // A0A1S3P571 // A0A1S3LEU6 // C0PUI5 // C0HBN6 // A0A1S3REW2 // A0A1S3KSP7 // A0A1S3LAT8 // A0A1S3L112 // A0A1S3PES7 // A0A1S3P463 // A0A1S3RG96 // A0A1S3RJ34 // A0A1S3QSA1 // A0A1S3RJ33 // A0A1S3LEE2 // A0A1S3N1N6 // A0A1S3KSV5 // B5XCV7 // A0A1S3LAU1 // A0A1S3RJ29 // A0A1S3N6U5 // A0A1S3L0S3 // A0A1S3N4F3 // A0A1S3P1X7 // A0A1S3P5C0 // A0A1S3KMV4 // A0A1S3REQ1 // A0A1S3SD33 // A0…
GO:0046165	BP	alcohol biosynthetic process	5	606	0.825083	95	65384	0.145295	5.67865	0.002	0.022	// B5DGL3 // B5XE59 // C0H9M4 // C0HBE4 // B5XB51	// A0A1S3S8E5 // C0H9M4 // A0A1S3R491 // B5XB51 // A0A1S3Q5S7 // B5X8G8 // A0A1S3P878 // A0A1S3LBG9 // B5XGF1 // A0A1S3NE86 // A0A1S3P877 // A0A1S3R550 // A0A1S3KQE9 // B5DGL3 // A0A1S3RAJ4 // A0A1S3R0L0 // B9EMU9 // A0A1S3LK49 // A0A1S3SXR7 // A0A1S3MDF7 // A0A1S3P869 // A0A1S3PV75 // A0A1S3P8C4 // B5XFE7 // A0A1S3RIB8 // A0A1S3MCR8 // A0A1S3M3I8 // A0A1S3P4E9 // A0A1S3QX20 // A0A1S3NE23 // A0A1…
GO:0044087	BP	regulation of cellular component biogenesis	7	606	1.15512	136	65384	0.208002	5.55339	0.00031	0.0041	// B5X4T2 // B5X2M7 // C0PU35 // B5X3R3 // C0HBN6 // C0H8S8 // B5DG56	// A0A1S3L0N8 // A0A1S3LLJ7 // A0A1S3L865 // A0A1S3LEU6 // C0HBN3 // C0PUI5 // C0HBN6 // A0A1S3REW2 // A0A1S3T6X0 // A0A1S3QU50 // A0A1S3PES9 // A0A1S3L112 // A0A1S3L0K8 // A0A1S3PES7 // A0A1S3NUX5 // A0A1S3P463 // A0A1S3RG96 // A0A1S3RBG3 // A0A1S3RJ34 // B9ELH8 // A0A1S3QSA1 // A0A1S3NHP7 // A0A1S3RJ33 // A0A1S3LEE2 // A0A1S3N1N6 // B5X5R2 // A0A1S3LUZ9 // B5X2M7 // A0A1S3P6B3 // A0A1S3KXA3 // …
GO:0009116	BP	nucleoside metabolic process	9	606	1.48515	177	65384	0.270708	5.48616	5e-05	0.00094	// B5XCJ8 // B5DFU2 // B5DGC6 // C0HAG6 // B5XE35 // B5X3F7 // B5DGF0 // B5X2Q5 // B5XBZ7	// A0A1S3NE69 // A0A1S3S795 // A0A1S3RMY7 // A0A1S3PAS6 // A0A1S3LT56 // A0A1S3LI38 // A0A1S3MP04 // C0H8Q7 // B5X5J2 // A0A1S3R5N6 // A0A1S3MM17 // A0A1S3KJA5 // A0A1S3Q5S5 // A0A1S3KZ43 // B5X4W4 // A0A1S3PWI0 // A0A1S3MG06 // B5DGC6 // A0A1S3KPP8 // A0A1S3Q916 // C0H9E7 // A0A1S3S3P9 // A0A1S3SZL9 // A0A1S3KUT9 // B5XAW0 // C0HBQ0 // A0A1S3KPI9 // A0A1S3KNR1 // B5XE35 // A0A1S3N978 // A0A1S3KV…
GO:0043244	BP	regulation of protein complex disassembly	6	606	0.990099	119	65384	0.182002	5.44005	0.00092	0.011	// B9EL07 // C0PU35 // B5X3R3 // C0HBN6 // C0H8S8 // B5DG56	// A0A1S3L0N8 // A0A1S3P571 // A0A1S3PLW1 // B9EMV4 // C0PUI5 // C0HBN6 // A0A1S3REW2 // A0A1S3PYF7 // A0A1S3PYF5 // A0A1S3KSP7 // A0A1S3LAT8 // A0A1S3L112 // A0A1S3R029 // B9EPC3 // A0A1S3PES7 // A0A1S3P463 // A0A1S3RG96 // A0A1S3QNW0 // A0A1S3QWT7 // A0A1S3RJ34 // A0A1S3QSA1 // A0A1S3RJ33 // A0A1S3LEE2 // A0A1S3N1N6 // A0A1S3PYG2 // A0A1S3KSV5 // A0A1S3PZV2 // B5XCV7 // A0A1S3LAU1 // A0A1S3LEU6…
GO:0006066	BP	alcohol metabolic process	26	606	4.29043	520	65384	0.795302	5.39472	1.3e-11	7.1e-10	// B9EPN0 // C0H9M4 // C0H7J1 // B5X0U6 // B5XB51 // I0J1J2 // I0J1J3 // C0H9I1 // C0HAA0 // B5X886 // C0H868 // K4J7W7 // B5DGL3 // B5XE59 // Q2A665 // B5X1B5 // B5X4R2 // B5DGQ7 // B5XD19 // B5DGU0 // C0H9U3 // B5X0R8 // B5X3K2 // B9EM17 // C0HBE4 // B5DFX8	// A0A1S3NF93 // A0A1S3NAG1 // C0H9M4 // C0H7J1 // A0A1S3QF86 // A0A1S3R491 // B5XB51 // A0A1S3LSB6 // A0A1S3Q5S7 // B5XE29 // A0A1S3P878 // A0A1S3PFE0 // A0A1S3KL23 // A0A1S3MKZ8 // B5XGF1 // A0A1S3P877 // A0A1S3MTL0 // A0A1S3KPC9 // A0A1S3LVB7 // B5DGL3 // A0A1S3P2A9 // A0A1S3RAJ4 // A0A1S3P2A7 // A0A1S3MSE7 // B9EMU9 // A0A1S3KPQ8 // B5X712 // A0A1S3Q488 // A0A1S3REP7 // A0A1S3S977 // A0A1S3S9…
GO:0045010	BP	actin nucleation	6	606	0.990099	121	65384	0.185061	5.35014	0.001	0.012	// C0HBR6 // C0PU35 // B5DGD5 // C0H8E0 // C0H9H2 // C0HBE5	// B5X9U3 // B5XG16 // A0A1S3SMG0 // B5XBV0 // A0A1S3SMG2 // A0A1S3SMG3 // A0A1S3KPH3 // A0A1S3MAZ4 // A0A1S3Q2Y2 // B5X6M8 // C0PUI5 // B9EMV2 // A0A1S3KL27 // A0A1S3M662 // B5XGN2 // A0A1S3L4F4 // B5X7J0 // B5X7J3 // A0A1S3RX20 // A0A1S3MBB0 // A0A1S3S073 // A0A1S3SMF8 // A0A1S3NSW4 // A0A1S3SMF5 // A0A1S3N5E1 // A0A1S3NFD8 // B5X7L8 // A0A1S3T5Q8 // A0A1S3MMA6 // B9EM18 // B5DGD5 // A0A1S3MNK0…
GO:0019725	BP	cellular homeostasis	20	606	3.30033	408	65384	0.624006	5.28894	3.8e-09	1.3e-07	// D0QEL0 // A0A0G3B776 // C0PUP1 // C0HBF4 // B5X489 // B5X291 // B5X9Q1 // B5X6M7 // B5X1P6 // B5X3C0 // B5X8H5 // B5X348 // B5X9L4 // B5X1H7 // B5DGD1 // B5X5Q6 // B5RIB0 // B5XCD1 // B5X7X7 // C0PU58	// B5X291 // B5X292 // A0A1S3RZE5 // A0A1S3LSB6 // B5XE28 // A0A1S3PFE0 // A0A1S3P4P3 // A0A1S3N642 // A0A1S3R659 // A0A1S3QAD3 // A0A1S3Q9E3 // A0A1S3MF23 // A0A1S3MF21 // A0A1S3MNE5 // B5X847 // A0A1S3QBU6 // A0A1S3MS04 // A0A1S3PBL0 // A0A1S3QB03 // A0A1S3PZM8 // P49946 // P49947 // A0A1S3LB65 // B9EM15 // A0A1S3Q375 // A0A1S3L0Y0 // B5X4Y3 // B5XF30 // B5X9S5 // A0A1S3R9B0 // B5X6K7 // A0A1S3…
GO:0009057	BP	macromolecule catabolic process	49	606	8.08581	1010	65384	1.54472	5.23448	1.2e-19	3.1e-17	// C0HAC7 // B5X8M1 // B9EPN0 // C0H9M4 // B5X9F8 // Q2A665 // B5X9D0 // B5DGG1 // B5X0U6 // B5XB51 // B5XCL4 // B5DGU0 // B5XD66 // I0J1J2 // B5XA36 // B9ELT2 // B9EPH8 // B5RI28 // I0J1J3 // B9EQ77 // C0H8V2 // C0H9I1 // B5X886 // B5DGU4 // B5X5I0 // B5DG42 // B9EPF8 // B5DGL3 // B5X6N3 // B5X6L7 // B5X1B5 // B5DGU9 // B5DGQ7 // B5DGJ1 // C0H9U3 // B5DGU5 // B9EPR5 // B5X0R8 // C0H856 // B5X3K2…	// A0A1S3SXI2 // C0H7J5 // B5XAV2 // A0A1S3LFV3 // B9EPU7 // A0A1S3LFL0 // A0A1S3MDV4 // B5X6M2 // A0A1S3NDY3 // A0A1S3PKS8 // B5XB51 // A0A1S3LSB6 // A0A1S3KMG9 // A0A1S3M1W8 // B5XC96 // B9ELV6 // B5XE29 // A0A1S3QX88 // A0A1S3PFE0 // A0A1S3L946 // B5XA59 // B5XA57 // B5XGF1 // A0A1S3MZY9 // A0A1S3SF12 // A0A1S3RQS6 // B5XA50 // A0A1S3RDI1 // A0A1S3PDQ4 // A0A1S3MUA9 // A0A1S3MYK8 // B5XFW6 // …
GO:0046483	BP	heterocycle metabolic process	28	606	4.62046	586	65384	0.896244	5.15536	6.7e-12	3.9e-10	// B5X373 // B5DGM5 // P68529 // B5X1E5 // C0HAG6 // C0H9X1 // C0H9G2 // B5X6S0 // B5X4D6 // B5XCJ8 // B5DGC9 // B5DGC6 // B5X886 // B5X3F7 // B5XD97 // C0HBA2 // B5X2Q5 // B5DFU2 // B9EPV2 // B5XE35 // B5RI36 // B5DGF0 // B5X3E6 // C0H976 // B5DG78 // B5XCA1 // B5XBZ7 // B5X195	// A0A1S3QDX4 // A0A1S3NUH3 // P80081 // A0A1S3MB97 // A0A1S3NLU5 // A0A1S3NLU6 // C0H9V7 // B5X4F2 // A0A1S3R6Y8 // A0A1S3PZF2 // B5X597 // A0A1S3N2K1 // A0A1S3RMI6 // A0A1S3MB92 // A0A1S3SUT6 // M4VHK7 // A0A1S3LGZ3 // A0A1S3P376 // A0A1S3RN25 // A0A1S3LJF5 // A0A1S3LI09 // A0A1S3SGM1 // A0A1S3KJB2 // B5X161 // A0A1S3RR12 // Q2EMR4 // B5X5R6 // A0A1S3KTP9 // A0A1S3R2A6 // A0A1S3R5N6 // A0A1S3T3…
GO:0009156	BP	ribonucleoside monophosphate biosynthetic process	5	606	0.825083	105	65384	0.16059	5.13783	0.0031	0.033	// B5X373 // B5XBZ7 // C0HAG6 // B5DFU2 // C0H976	// A0A1S3S795 // A0A1S3PSZ6 // A0A1S3T6P8 // A0A1S2X0C2 // A0A1S3LI38 // A0A1S3MM17 // A0A1S3KJA5 // A0A1S3R6Y8 // A0A1S3MJE5 // A0A1S3P9N1 // A0A1S3MG06 // A0A1S3KPP8 // A0A1S3MIB4 // A0A1S3LIL6 // A0A1S3MM09 // C0HBQ0 // C0H8Y0 // A0A1S3LJF5 // A0A1S3LDC9 // A0A1S3KQW3 // A0A1S3Q918 // A0A1S3KJJ6 // A0A1S3L167 // A0A1S3KP88 // A0A1S3RIB2 // B5X373 // B5DGM3 // B5DGM4 // A0A1S3NWR5 // A0A1S3LC12…
GO:0030834	BP	regulation of actin filament depolymerization	5	606	0.825083	105	65384	0.16059	5.13783	0.0031	0.033	// C0H8S8 // B5X3R3 // C0HBN6 // C0PU35 // B5DG56	// A0A1S3L0N8 // A0A1S3P571 // A0A1S3LEU6 // C0PUI5 // C0HBN6 // A0A1S3REW2 // A0A1S3PYF7 // A0A1S3PYF5 // A0A1S3LAT8 // A0A1S3L112 // A0A1S3R029 // B9EPC3 // A0A1S3PES7 // A0A1S3P463 // A0A1S3RG96 // A0A1S3QNW0 // A0A1S3QWT7 // A0A1S3RJ34 // A0A1S3QSA1 // A0A1S3RJ33 // A0A1S3LEE2 // A0A1S3N1N6 // A0A1S3PYG2 // A0A1S3PZV2 // B5XCV7 // A0A1S3LAU1 // A0A1S3RJ29 // A0A1S3N6U5 // A0A1S3L0S3 // A0A1S3…
GO:0009165	BP	nucleotide biosynthetic process	18	606	2.9703	387	65384	0.591888	5.01834	4.8e-08	1.3e-06	// B5X373 // B5XCJ8 // B5DGM5 // B5DGC9 // B5DFU2 // C0H9G2 // B5DGC6 // B5DG78 // C0HAG6 // B5XE35 // B5RI36 // B5X6S0 // B5X4D6 // B5XCA1 // P68529 // B5XBZ7 // B5X195 // C0H976	// A0A1S3MSE8 // A0A1S3NUH3 // A0A1S3NLU5 // A0A1S3NLU6 // A0A1S3R6Y8 // A0A1S3PZF2 // B5X597 // A0A1S3N2K1 // A0A1S3RMI6 // A0A1S3KUT1 // A0A1S3SUT6 // M4VHK7 // A0A1S3LGZ3 // A0A1S3RN25 // A0A1S3LJF5 // A0A1S3QMQ1 // Q2EMR4 // A0A1S3R2A6 // A0A1S3R5N6 // C0PU79 // A0A1S3MZF5 // A0A1S3R018 // B5DH26 // A0A1S3KIA7 // A0A1S3MCT3 // A0A1S3NZZ1 // A0A1S3M770 // A0A1S3SNP1 // A0A1S3RQN1 // A0A1S3SNP8…
GO:0006084	BP	acetyl-CoA metabolic process	6	606	0.990099	130	65384	0.198825	4.97974	0.0015	0.017	// B5X485 // B5X0X6 // C0H820 // B5X4R5 // B5DGS2 // B5XAM9	// A0A1S3L755 // A0A1S3PJ17 // A0A1S3SY70 // B5XF85 // B5XG17 // B5DFT8 // A0A1S3PSZ8 // A0A1S3RIQ4 // A0A1S3MIZ7 // A0A1S3NLF4 // A0A1S3QYR3 // A0A1S3NM50 // A0A1S3SPX2 // A0A1S3P3R4 // A0A1S3P3R7 // A0A1S3N6C0 // A0A1S3R9A9 // A0A1S3M7V1 // A0A1S3PRN5 // A0A1S3P469 // A0A1S3NHE5 // A0A1S3NMP8 // A0A1S3M1M9 // A0A1S3P5U1 // A0A1S3R6I6 // B5X7C7 // B5X0X6 // A0A1S3P048 // A0A1S3R8S7 // A0A1S3SPW4…
GO:0034637	BP	cellular carbohydrate biosynthetic process	5	606	0.825083	111	65384	0.169766	4.86011	0.004	0.041	// B5DGL3 // B5XE59 // C0H9M4 // C0HBE4 // B5XB51	// A0A1S3NV54 // C0H9M4 // A0A1S3R491 // B5XB51 // A0A1S3Q5S7 // B5X8G8 // A0A1S3P878 // A0A1S3LBG9 // A0A1S3NUP6 // B5XGF1 // A0A1S3NE86 // A0A1S3NSQ1 // A0A1S3P877 // A0A1S3R550 // A0A1S3KQE9 // B5DGL3 // A0A1S3RAJ4 // A0A1S3R0L0 // B9EMU9 // A0A1S3LK49 // A0A1S3LGI4 // A0A1S3SXR7 // A0A1S3Q5R6 // A0A1S3MDF7 // A0A1S3P869 // A0A1S3PV75 // A0A1S3P8C4 // B5XFE7 // A0A1S3RIB8 // A0A1S3MCR8 // A0A1…
GO:0006753	BP	nucleoside phosphate metabolic process	23	606	3.79538	513	65384	0.784596	4.83737	1.5e-09	5.8e-08	// B5X373 // B5DG78 // B9EPN0 // P68529 // C0HAG6 // C0H9X1 // C0H9G2 // B5X6S0 // B5X4D6 // B5DGM5 // B5XCJ8 // B5DGC9 // B5DGC6 // B5XD97 // B5DFU2 // B5XE35 // B5RI36 // C0H9U3 // C0H976 // B9EM17 // B5XCA1 // B5XBZ7 // B5X195	// A0A1S3MSE8 // A0A1S3NT29 // A0A1S3NUH3 // A0A1S3NLU5 // A0A1S3NLU6 // A0A1S3Q5S5 // A0A1S3R6Y8 // A0A1S3PZF2 // B5X597 // A0A1S3N2K1 // B5X124 // A0A1S3PPW1 // A0A1S3RMI6 // A0A1S3KUT1 // A0A1S3SEE0 // A0A1S3SUT6 // M4VHK7 // A0A1S3LGZ3 // A0A1S3RN25 // A0A1S3LJF5 // A0A1S3QMQ1 // C0H9F4 // B5X161 // Q2EMR4 // B5RIB1 // B9EM17 // A0A1S3R2A6 // A0A1S3R5N6 // C0PU79 // A0A1S3P282 // A0A1S3MZF5 /…
GO:0009117	BP	nucleotide metabolic process	23	606	3.79538	513	65384	0.784596	4.83737	1.5e-09	5.8e-08	// B5X373 // B5DG78 // B9EPN0 // P68529 // C0HAG6 // C0H9X1 // C0H9G2 // B5X6S0 // B5X4D6 // B5DGM5 // B5XCJ8 // B5DGC9 // B5DGC6 // B5XD97 // B5DFU2 // B5XE35 // B5RI36 // C0H9U3 // C0H976 // B9EM17 // B5XCA1 // B5XBZ7 // B5X195	// A0A1S3MSE8 // A0A1S3NT29 // A0A1S3NUH3 // A0A1S3NLU5 // A0A1S3NLU6 // A0A1S3Q5S5 // A0A1S3R6Y8 // A0A1S3PZF2 // B5X597 // A0A1S3N2K1 // B5X124 // A0A1S3PPW1 // A0A1S3RMI6 // A0A1S3KUT1 // A0A1S3SEE0 // A0A1S3SUT6 // M4VHK7 // A0A1S3LGZ3 // A0A1S3RN25 // A0A1S3LJF5 // A0A1S3QMQ1 // C0H9F4 // B5X161 // Q2EMR4 // B5RIB1 // B9EM17 // A0A1S3R2A6 // A0A1S3R5N6 // C0PU79 // A0A1S3P282 // A0A1S3MZF5 /…
GO:0008154	BP	actin polymerization or depolymerization	10	606	1.65017	229	65384	0.350239	4.71155	7.1e-05	0.0011	// B5DGL1 // B5X4T2 // B5X2M7 // C0PU35 // B5DGD5 // B5X3R3 // B9ELH2 // C0HBN6 // C0H8S8 // B5DG56	// A0A1S3L0N8 // B5X9U3 // A0A1S3Q9L8 // A0A1S3SMG0 // A0A1S3SMG2 // A0A1S3Q9L4 // A0A1S3MUQ2 // A0A1S3Q9L0 // A0A1S3MAZ4 // A0A1S3QX06 // A0A1S3LEU6 // A0A1S3LKB4 // C0HBN3 // A0A1S3P571 // C0PUI5 // C0HBN6 // A0A1S3REW2 // A0A1S3PYF7 // B5XCW2 // B5X8V4 // A0A1S3MQR3 // A0A1S3LAT8 // A0A1S3L112 // B5XGN2 // A0A1S3QTS8 // B5X7J0 // A0A1S3R029 // B9EPC3 // A0A1S3MBB0 // A0A1S3MUQ6 // A0A1S3PES7 /…
GO:0044265	BP	cellular macromolecule catabolic process	41	606	6.76568	953	65384	1.45754	4.64184	4.7e-15	4.5e-13	// B5X8M1 // B9EPN0 // C0H9M4 // B5X9F8 // Q2A665 // B5X9D0 // B5DGG1 // B5X0U6 // B5XB51 // B5XCL4 // B5DGU0 // B5XD66 // I0J1J2 // B5XA36 // C0H9I1 // B9EPH8 // I0J1J3 // B9EQ77 // B5X886 // B9EPR5 // B5DG42 // B5DGL3 // B5X6N3 // B5X6L7 // B5DGU4 // B5X1B5 // B5DGQ7 // B5DGJ1 // C0H9U3 // B5DGU5 // B5XFH8 // B5X0R8 // C0H856 // B5X3K2 // B5XGP5 // B9EM17 // B5XGI9 // B5XAG6 // B5RI58 // B5DG53…	// A0A1S3SXI2 // C0H7J5 // B5XAV2 // A0A1S3LFV3 // B9EPU7 // A0A1S3LFL0 // A0A1S3MDV4 // A0A1S3NDY3 // A0A1S3PKS8 // B5XB51 // A0A1S3LSB6 // A0A1S3KMG9 // A0A1S3M1W8 // B5XC96 // B9ELV6 // B5XE29 // A0A1S3QX88 // A0A1S3PFE0 // A0A1S3L946 // B5XA59 // B5XA57 // B5XGF1 // A0A1S3MZY9 // A0A1S3SF12 // A0A1S3RQS6 // B5XA50 // A0A1S3RDI1 // A0A1S3PDQ4 // A0A1S3MUA9 // A0A1S3MYK8 // B5XFW6 // A0A1S3QCH0…
GO:0010639	BP	negative regulation of organelle organization	6	606	0.990099	141	65384	0.215649	4.59125	0.0022	0.024	// B5X2M7 // C0PU35 // B5X3R3 // C0HBN6 // C0H8S8 // B5DG56	// A0A1S3L0N8 // A0A1S3P571 // B5XBV0 // A0A1S3RYX9 // A0A1S3LEU6 // C0HBN3 // C0PUI5 // C0HBN6 // A0A1S3REW2 // A0A1S3QU50 // A0A1S3KSP7 // A0A1S3LAT8 // A0A1S3L112 // A0A1S3QN01 // B5X7J3 // A0A1S3QIM3 // A0A1S3PES7 // A0A1S3P463 // A0A1S3RG96 // B9ENG8 // A0A1S3NSW4 // A0A1S3RJ34 // B9ELH8 // A0A1S3QSA1 // A0A1S3RJ33 // A0A1S3LEE2 // A0A1S3N1N6 // A0A1S3KSV5 // B5X2M7 // A0A1S3P6B3 // B5XCV7 /…
GO:0055086	BP	nucleobase, nucleoside and nucleotide metabolic process	26	606	4.29043	612	65384	0.936009	4.58375	4.4e-10	1.8e-08	// B5X373 // B5DG78 // B9EPN0 // P68529 // C0HAG6 // C0H9X1 // C0H9G2 // B5X6S0 // B5X4D6 // B5DGM5 // B5XCJ8 // B5DGC9 // B5DGC6 // B5X3F7 // B5XD97 // B5X2Q5 // B5DFU2 // B5XE35 // B5RI36 // B5DGF0 // C0H9U3 // C0H976 // B9EM17 // B5XCA1 // B5XBZ7 // B5X195	// A0A1S3MSE8 // A0A1S3NT29 // A0A1S3NUH3 // A0A1S3MP04 // A0A1S3NLU5 // A0A1S3NLU6 // A0A1S3Q5S5 // A0A1S3R6Y8 // A0A1S3PZF2 // B5X597 // A0A1S3PWI0 // A0A1S3N2K1 // B5X124 // A0A1S3PPW1 // A0A1S3RMI6 // A0A1S3KUT1 // A0A1S3SEE0 // A0A1S3SUT6 // A0A1S3KUT9 // M4VHK7 // A0A1S3LGZ3 // A0A1S3RN25 // A0A1S3PG84 // A0A1S3LJF5 // A0A1S3QMQ1 // C0H9F4 // B5X161 // A0A1S3RQE7 // Q2EMR4 // B5RIB1 // A0A1…
GO:0051129	BP	negative regulation of cellular component organization	6	606	0.990099	148	65384	0.226355	4.3741	0.0028	0.03	// B5X2M7 // C0PU35 // B5X3R3 // C0HBN6 // C0H8S8 // B5DG56	// A0A1S3L0N8 // A0A1S3P571 // B5XBV0 // A0A1S3RYX9 // A0A1S3L865 // A0A1S3LEU6 // C0HBN3 // C0PUI5 // C0HBN6 // A0A1S3REW2 // A0A1S3QU50 // A0A1S3KSP7 // A0A1S3LAT8 // A0A1S3L112 // A0A1S3QN01 // B5X7J3 // A0A1S3QIM3 // A0A1S3PES7 // A0A1S3P463 // A0A1S3RG96 // B9ENG8 // A0A1S3NSW4 // A0A1S3RJ34 // B9ELH8 // A0A1S3QSA1 // A0A1S3RJ33 // A0A1S3LEE2 // A0A1S3N1N6 // A0A1S3KSV5 // B5X2M7 // A0A1S3P6…
GO:0032535	BP	regulation of cellular component size	7	606	1.15512	174	65384	0.26612	4.34058	0.0013	0.015	// B5X4T2 // B5X2M7 // C0PU35 // B5X3R3 // C0HBN6 // C0H8S8 // B5DG56	// A0A1S3MDG8 // A0A1S3L0N8 // A0A1S3P571 // A0A1S3PDE8 // A0A1S3LEU6 // C0HBN3 // C0PUI5 // C0HBN6 // A0A1S3REW2 // A0A1S3PYF7 // A0A1S3PYF5 // A0A1S3NJ69 // A0A1S3LAT8 // A0A1S3L112 // A0A1S3LAV2 // A0A1S3R029 // B9EPC3 // A0A1S3QBD7 // A0A1S3PES7 // A0A1S3NKA6 // A0A1S3P463 // A0A1S3RG96 // A0A1S3RBG3 // A0A1S3QNW0 // A0A1S3QWT7 // A0A1S3RJ34 // B9ELH8 // A0A1S3QSA1 // A0A1S3RJ33 // A0A1S3L1T5…
GO:0032970	BP	regulation of actin filament-based process	7	606	1.15512	174	65384	0.26612	4.34058	0.0013	0.015	// B5X4T2 // B5X2M7 // C0PU35 // B5X3R3 // C0HBN6 // C0H8S8 // B5DG56	// A0A1S3L0N8 // A0A1S3P571 // B5XBV0 // A0A1S3NR94 // A0A1S3RFA5 // A0A1S3LEU6 // C0HBN3 // C0PUI5 // C0HBN6 // A0A1S3R715 // A0A1S3QR35 // A0A1S3T6X0 // A0A1S3PYF7 // A0A1S3PYF5 // A0A1S3LAT8 // A0A1S3L112 // B5X7J3 // A0A1S3R029 // B9EPC3 // A0A1S3PES7 // A0A1S3QP36 // A0A1S3P463 // A0A1S3M8W1 // A0A1S3L5L0 // A0A1S3RG96 // A0A1S3Q1B1 // A0A1S3NSW4 // A0A1S3RBG3 // A0A1S3QNW0 // A0A1S3QWT7 // …
GO:0032956	BP	regulation of actin cytoskeleton organization	7	606	1.15512	174	65384	0.26612	4.34058	0.0013	0.015	// B5X4T2 // B5X2M7 // C0PU35 // B5X3R3 // C0HBN6 // C0H8S8 // B5DG56	// A0A1S3L0N8 // A0A1S3P571 // B5XBV0 // A0A1S3NR94 // A0A1S3RFA5 // A0A1S3LEU6 // C0HBN3 // C0PUI5 // C0HBN6 // A0A1S3R715 // A0A1S3QR35 // A0A1S3T6X0 // A0A1S3PYF7 // A0A1S3PYF5 // A0A1S3LAT8 // A0A1S3L112 // B5X7J3 // A0A1S3R029 // B9EPC3 // A0A1S3PES7 // A0A1S3QP36 // A0A1S3P463 // A0A1S3M8W1 // A0A1S3L5L0 // A0A1S3RG96 // A0A1S3Q1B1 // A0A1S3NSW4 // A0A1S3RBG3 // A0A1S3QNW0 // A0A1S3QWT7 // …
GO:0045087	BP	innate immune response	6	606	0.990099	150	65384	0.229414	4.31578	0.003	0.032	// B5X397 // B9ELD5 // B5DG91 // C0HBD9 // B5X851 // B5DGU4	// A0A1S3QI20 // A0A1S3N082 // A0A1S3NBM1 // A0A1S3T2H8 // A0A1S3LAM7 // B5XE24 // Q1A3D7 // A0A1S3N9M0 // A0A1S3N9M2 // B5DGT6 // B5DGU3 // B5DGT5 // A0A1S3LV19 // B5XFU9 // A0A1S3MLL4 // B5DGU4 // A0A1S3LGL6 // A0A1S3M055 // Q9DD37 // Q29W12 // Q6XQG6 // B5X3D9 // B9EPV8 // A0A1S3Q1E8 // A0A1S3MDN9 // Q800Z5 // C0H9N2 // A0A1S3RFT8 // M4V2E4 // A0A1S3MHJ4 // A0A3G9EPZ0 // A0A1S3SEA0 // A0A1S3NR…
GO:0018130	BP	heterocycle biosynthetic process	7	606	1.15512	177	65384	0.270708	4.26701	0.0015	0.017	// B5DFU2 // B9EPV2 // B5X3E6 // B5DGF0 // B5X2Q5 // C0HBA2 // B5XBZ7	// A0A1S3MIB4 // A0A1S3PSZ6 // C0H9V7 // A0A1S3P8B8 // A0A1S3MB92 // P80081 // B5X5J2 // A0A1S3MM17 // B5X4F2 // A0A1S3L4I4 // A0A1S3MJE5 // A0A1S3Q5D8 // B5X910 // A0A1S3KPP8 // A0A1S3SAY3 // A0A1S3LF74 // A0A1S3LF73 // A0A1S3MBB1 // A0A1S3MBB6 // A0A1S3LIL6 // A0A1S3RG92 // A0A1S3M7V4 // B5XG28 // C0H9B1 // C0H8Y0 // A0A1S3MB97 // A0A1S3KSG6 // A0A1S3LI09 // B9EPV2 // A0A1S3S0Z2 // A0A1S3KJB2 /…
GO:0030163	BP	protein catabolic process	26	606	4.29043	660	65384	1.00942	4.25039	2.1e-09	7.8e-08	// C0HAC7 // B5X8M1 // B5X9F8 // B5X9D0 // B5DGG1 // B5XCL4 // B5DGJ1 // B5XD66 // C0H8V2 // B5RI28 // B9EQ77 // B5XFH8 // B9EPR5 // B5X5I0 // B5X6N3 // B5DGU9 // B5RI58 // B5DGU5 // B5DGU4 // C0H856 // B5XGP5 // B5XGI9 // B5XAG6 // B9EPF8 // B5DG36 // B5DG53	// A0A1S3SXI2 // B5XAL3 // A0A1S3P478 // B9EPU7 // A0A1S3MDV4 // B5X6M2 // A0A1S3RTX4 // A0A1S3KMG9 // A0A1S3M1W8 // B5XC96 // A0A1S3QX88 // A0A1S3NQV8 // A0A1S3L946 // B5XA59 // A0A1S3SF12 // A0A1S3RQS6 // B5XA50 // A0A1S3RDI1 // A0A1S3PDQ4 // A0A1S3MUA9 // B5XFW6 // A0A1S3QCH0 // A0A1S3PYN0 // A0A1S3KHZ2 // A0A1S3RE52 // A0A1S3LD63 // A0A1S3LER3 // A0A1S3KT49 // A0A1S3LD68 // A0A1S3PV72 // A0A1…
GO:0007015	BP	actin filament organization	18	606	2.9703	457	65384	0.698948	4.24967	5.4e-07	1.4e-05	// C7C4W8 // B5DGL1 // B5X3R3 // B5X4T2 // C0HBR6 // B5X2M7 // C0PU35 // B5DGD5 // B9ELH2 // B5XB79 // C0H8E0 // B5XAM0 // C0H9I5 // B5DG56 // C0H9H2 // C0HBN6 // C0H8S8 // C0HBE5	// A0A1S3QMM5 // A0A1S3P571 // A0A1S3Q9L8 // A0A1S3Q9L4 // A0A1S3Q9L0 // A0A1S3MGC3 // A0A1S3RKM1 // A0A1S3KL27 // B5XCW2 // B5XG16 // A0A1S3MQR3 // A0A1S3RG30 // B5X7J0 // B5X7J3 // B5DGL1 // A0A1S3RBG3 // A0A1S3QNW0 // A0A1S3RJ34 // A0A1S3QSA1 // A0A1S3RJ33 // A0A1S3KPH3 // A0A1S3NHE9 // B9EM18 // B5XC25 // A0A1S3SLW7 // A0A1S3NJG0 // B9EM12 // A0A1S3KXA3 // B5XCV7 // A0A1S3MNK0 // A0A1S3KP47 /…
GO:0015672	BP	monovalent inorganic cation transport	6	606	0.990099	153	65384	0.234002	4.23115	0.0033	0.034	// B5DGC9 // P68529 // B5DG78 // B5RI36 // B5X6S0 // B5X195	// A0A1S3QMM4 // C0H9M6 // B5XEF3 // A0A1S3PT94 // B5XDF0 // A0A1S3PGC5 // B5X5B0 // B5RIB1 // A0A1S3SKP0 // B5X597 // A0A1S3M0Y3 // A0A1S3PXV1 // C0H715 // A0A1S3MMS6 // B5X5J7 // A0A1S3KPX5 // M4VHK7 // W0LQS8 // A0A1S3LGZ3 // E2JDJ1 // B5XCL0 // B5XEN1 // B5XGG0 // A0A1S3PD40 // C0H7F7 // A0A1S3N170 // A0A1S3N1N3 // A0A1S3QGS1 // A0A1S3QFU3 // A0A1S3LTF4 // A0A1S3NYI0 // B5DH26 // B5X195 // B9…
GO:0006520	BP	cellular amino acid metabolic process	15	606	2.47525	393	65384	0.601064	4.11811	6.5e-06	0.00016	// B5X4N7 // C0HA51 // B5X423 // B5X1P3 // B5X837 // B5X1V6 // C0PUL2 // B5X2Q5 // Q7ZZK9 // Q7ZZK8 // C0HBA2 // B5X340 // B5X1G4 // Q7ZZL0 // Q7T1N7	// A0A1S3MSE8 // A0A1S3M2M9 // A0A1S3N0K4 // A0A1S3P7Z9 // A0A1S3KL23 // A0A1S3N2K1 // A0A1S3ME44 // B5XGF7 // A0A1S3KPC7 // A0A1S3MUA7 // C0PU89 // A0A1S3P376 // A0A1S3KJB2 // A0A1S3QF15 // A0A1S3LER1 // A0A1S3RR12 // B5X205 // A0A1S3KRL1 // C0HBA2 // A0A1S3MQY3 // A0A1S3L4C4 // A0A1S3L4C0 // A0A1S3KK23 // A0A1S3PLH0 // A0A1S3NIY9 // A0A1S3KIN9 // A0A1S3PG83 // C0HB36 // A0A1S3RQN3 // A0A1S3L8G8…
GO:0009308	BP	amine metabolic process	20	606	3.30033	532	65384	0.813655	4.05618	2.8e-07	7.1e-06	// B5X4N7 // B5X1G4 // C0HA51 // B5X423 // B5X1P3 // C0H9N4 // C0HAB4 // Q7ZZK8 // B5X1C6 // B5X1V6 // B5XD19 // C0PUL2 // B5X2Q5 // Q7ZZK9 // B5X837 // C0HBA2 // B5X340 // B9ELT2 // Q7ZZL0 // Q7T1N7	// A0A1S3MSE8 // A0A1S3M2M9 // B5X1C6 // A0A1S3QKV6 // A0A1S3N0K4 // A0A1S3NUU7 // A0A1S3P7Z9 // A0A1S3KL23 // A0A1S3LED4 // A0A1S3N2K1 // A0A1S3ME44 // B5XGF7 // A0A1S3KPC7 // A0A1S3MUA7 // A0A1S3RWX3 // A0A1S3RB55 // A0A1S3P376 // A0A1S3KJB2 // A0A1S3QF15 // A0A1S3LER1 // A0A1S3RR12 // B5X205 // B5X2T1 // A0A1S3KRL1 // C0HBA2 // A0A1S3MQY3 // A0A1S3L4C4 // A0A1S3L4C0 // A0A1S3KY97 // A0A1S3KK23…
GO:0006519	BP	cellular amino acid and derivative metabolic process	19	606	3.13531	521	65384	0.796831	3.93473	8.4e-07	2.1e-05	// B5X4N7 // C0HA51 // B5X423 // B5X1P3 // B5X0S0 // Q7ZZK8 // B5X1C6 // B5X1V6 // B5XD19 // C0PUL2 // B5X2Q5 // Q7ZZK9 // B5X837 // C0HBA2 // B5X340 // B5X3C0 // B5X1G4 // Q7ZZL0 // Q7T1N7	// A0A1S3MSE8 // A0A1S3NM74 // A0A1S3M2M9 // B5X1C6 // A0A1S3N0K4 // A0A1S3NUU7 // A0A1S3P7Z9 // A0A1S3KL23 // A0A1S3L8R0 // A0A1S3N2K1 // A0A1S3ME44 // B5XGF7 // A0A1S3SYI0 // A0A1S3MUA7 // A0A1S3RWX3 // C0PU89 // A0A1S3P376 // A0A1S3KJB2 // A0A1S3QF15 // A0A1S3LER1 // A0A1S3RR12 // B5X205 // B5X2T1 // A0A1S3KRL1 // C0HBA2 // A0A1S3QTW1 // A0A1S3MQY3 // A0A1S3L4C4 // A0A1S3L4C0 // A0A1S3KY97 // …
GO:0044106	BP	cellular amine metabolic process	16	606	2.64026	447	65384	0.683653	3.86199	7.4e-06	0.00017	// B5X4N7 // C0HA51 // B5X423 // B5X1P3 // B5X837 // B5X1V6 // B5XD19 // C0PUL2 // B5X2Q5 // Q7ZZK9 // Q7ZZK8 // C0HBA2 // B5X340 // B5X1G4 // Q7ZZL0 // Q7T1N7	// A0A1S3MSE8 // A0A1S3M2M9 // A0A1S3N0K4 // A0A1S3NUU7 // A0A1S3P7Z9 // A0A1S3KL23 // A0A1S3N2K1 // A0A1S3ME44 // B5XGF7 // A0A1S3KPC7 // A0A1S3MUA7 // A0A1S3RWX3 // C0PU89 // A0A1S3P376 // A0A1S3KJB2 // A0A1S3QF15 // A0A1S3LER1 // A0A1S3RR12 // B5X205 // B5X2T1 // A0A1S3KRL1 // C0HBA2 // A0A1S3MQY3 // A0A1S3L4C4 // A0A1S3L4C0 // A0A1S3KY97 // A0A1S3KK23 // A0A1S3PLH0 // A0A1S3NIY9 // A0A1S3KIN9…
GO:0043436	BP	oxoacid metabolic process	26	606	4.29043	742	65384	1.13483	3.78067	2.2e-08	6.8e-07	// B5X1G4 // C0H9M4 // B5X423 // B5X340 // Q7T1N7 // B5X1V6 // C0HAI2 // B5X2Q5 // Q7ZZK9 // Q7ZZK8 // C0H820 // B5DGL3 // C0HA51 // C0PUL2 // B5X4R5 // C0H9U3 // B5DGS2 // B5XAM9 // C0PU77 // B5X485 // B5X1P3 // B5X4N7 // C0HBA2 // B5X837 // Q7ZZL0 // B5XB51	// A0A1S3MSE8 // A0A1S3MSE9 // B5X4R5 // A0A1S3RIQ4 // A0A1S3M2M9 // A0A1S3RM23 // B5XB51 // A0A1S3Q5S7 // A0A1S3N0K4 // A0A1S3L087 // C0H9M4 // A0A1S3P7Z9 // A0A1S3PLM1 // A0A1S3KL22 // A0A1S3KL23 // A0A1S3N2K1 // A0A1S3ME44 // C0H9P1 // B5XGF7 // A0A1S3RIX0 // A0A1S3KPC7 // A0A1S3MYK9 // A0A1S3RNL9 // A0A1S3MUA7 // A0A1S3MUA3 // B5DGL3 // C0PU89 // A0A1S3P376 // B9EMU9 // A0A1S3KJB2 // A0A1S3NW…
GO:0019752	BP	carboxylic acid metabolic process	26	606	4.29043	742	65384	1.13483	3.78067	2.2e-08	6.8e-07	// B5X1G4 // C0H9M4 // B5X423 // B5X340 // Q7T1N7 // B5X1V6 // C0HAI2 // B5X2Q5 // Q7ZZK9 // Q7ZZK8 // C0H820 // B5DGL3 // C0HA51 // C0PUL2 // B5X4R5 // C0H9U3 // B5DGS2 // B5XAM9 // C0PU77 // B5X485 // B5X1P3 // B5X4N7 // C0HBA2 // B5X837 // Q7ZZL0 // B5XB51	// A0A1S3MSE8 // A0A1S3MSE9 // B5X4R5 // A0A1S3RIQ4 // A0A1S3M2M9 // A0A1S3RM23 // B5XB51 // A0A1S3Q5S7 // A0A1S3N0K4 // A0A1S3L087 // C0H9M4 // A0A1S3P7Z9 // A0A1S3PLM1 // A0A1S3KL22 // A0A1S3KL23 // A0A1S3N2K1 // A0A1S3ME44 // C0H9P1 // B5XGF7 // A0A1S3RIX0 // A0A1S3KPC7 // A0A1S3MYK9 // A0A1S3RNL9 // A0A1S3MUA7 // A0A1S3MUA3 // B5DGL3 // C0PU89 // A0A1S3P376 // B9EMU9 // A0A1S3KJB2 // A0A1S3NW…
GO:0006082	BP	organic acid metabolic process	26	606	4.29043	743	65384	1.13636	3.77558	2.2e-08	6.8e-07	// B5X1G4 // C0H9M4 // B5X423 // B5X340 // Q7T1N7 // B5X1V6 // C0HAI2 // B5X2Q5 // Q7ZZK9 // Q7ZZK8 // C0H820 // B5DGL3 // C0HA51 // C0PUL2 // B5X4R5 // C0H9U3 // B5DGS2 // B5XAM9 // C0PU77 // B5X485 // B5X1P3 // B5X4N7 // C0HBA2 // B5X837 // Q7ZZL0 // B5XB51	// A0A1S3MSE8 // A0A1S3MSE9 // B5X4R5 // A0A1S3RIQ4 // A0A1S3M2M9 // A0A1S3RM23 // B5XB51 // A0A1S3Q5S7 // A0A1S3N0K4 // A0A1S3L087 // C0H9M4 // A0A1S3P7Z9 // A0A1S3PLM1 // A0A1S3KL22 // A0A1S3KL23 // A0A1S3N2K1 // A0A1S3ME44 // C0H9P1 // B5XGF7 // A0A1S3RIX0 // A0A1S3KPC7 // A0A1S3MYK9 // A0A1S3RNL9 // A0A1S3MUA7 // A0A1S3MUA3 // B5DGL3 // C0PU89 // A0A1S3P376 // B9EMU9 // A0A1S3KJB2 // A0A1S3NW…
GO:0034641	BP	cellular nitrogen compound metabolic process	25	606	4.12541	716	65384	1.09507	3.76726	4.3e-08	1.2e-06	// B5X1G4 // B9EPN0 // C0HAG6 // B5X3E6 // C0H9U3 // Q7T1N7 // B5X423 // B5X2Q5 // Q7ZZK9 // Q7ZZK8 // B5DFU2 // B9EPV2 // C0HA51 // B5XD19 // C0PUL2 // B5X340 // B5XBZ7 // B5X1P3 // B9EM17 // B5X1V6 // B5X4N7 // C0HBA2 // B5X837 // B5DGF0 // Q7ZZL0	// A0A1S3MSE8 // A0A1S3MB92 // A0A1S3MB97 // A0A1S3PSZ6 // A0A1S3M2M9 // C0H9V7 // A0A1S3N0K4 // B5X4F2 // A0A1S3P7Z9 // A0A1S3NL90 // A0A1S3KL23 // A0A1S3N2K1 // A0A1S3ME44 // B5XGF7 // A0A1S3KUT1 // A0A1S3PV30 // A0A1S3KPC7 // A0A1S3MUA7 // A0A1S3RWX3 // C0PU89 // A0A1S3P376 // A0A1S3NJT5 // A0A1S3LI09 // A0A1S3SGM1 // A0A1S3KJB2 // A0A1S3QF15 // A0A1S3LER1 // A0A1S3RR12 // B5X205 // B5X5R6 // …
GO:0009056	BP	catabolic process	58	606	9.57096	1669	65384	2.55261	3.74948	2.7e-16	3e-14	// C0HAC7 // B5X2C7 // B5XFH8 // B9EPN0 // C0H9M4 // B5X9F8 // Q2A665 // B5X9D0 // B5X4Y9 // B5DGG1 // B5X8M1 // B5X0U6 // B5XB51 // B5XCL4 // B5DGU0 // B5XD66 // I0J1J2 // B5XA36 // B9ELT2 // B9EPH8 // B5RI28 // B5XGI9 // I0J1J3 // B9EQ77 // C0H8V2 // C0H9I1 // B5DGS2 // B5X886 // B5DGU4 // B5XAG6 // C0H820 // B5X5I0 // B5DG42 // B9EPF8 // B5DGL3 // B5X6N3 // B5X6L7 // B5X1B5 // B5DGU9 // B5DGQ7…	// A0A1S3QUL8 // B5X441 // B9EPU7 // A0A1S3QG24 // A0A1S3NDY3 // A0A1S3R719 // A0A1S3LSB6 // B9ELV6 // A0A1S3MAK7 // B9EQ59 // A0A1S3MZY9 // A0A1S3SF12 // A0A1S3RQS6 // A0A1S3RDI1 // A0A1S3MF22 // A0A1S3KVL3 // A0A1S3QCH0 // A0A1S3MAY6 // C0H9F4 // C0HB88 // A0A1S3RR12 // A0A1S3KHZ2 // A0A1S3MIQ1 // A0A1S3T3E6 // A0A1S3RAA9 // A0A1S3QTW1 // C0HAC7 // C0HAC0 // B5XG31 // C0HAC8 // A0A1S3LGS1 // A0…
GO:0042592	BP	homeostatic process	20	606	3.30033	576	65384	0.880949	3.74633	9.4e-07	2.3e-05	// D0QEL0 // A0A0G3B776 // C0PUP1 // C0HBF4 // B5X489 // B5X291 // B5X9Q1 // B5X6M7 // B5X1P6 // B5X3C0 // B5X8H5 // B5X348 // B5X9L4 // B5X1H7 // B5DGD1 // B5X5Q6 // B5RIB0 // B5XCD1 // B5X7X7 // C0PU58	// B5X291 // B5X292 // A0A1S3RZE5 // A0A1S3M6S8 // A0A1S3LSB6 // A0A1S3MH64 // B5XE28 // A0A1S3PFE6 // A0A1S3PFE0 // A0A1S3KXH2 // A0A1S3KXH3 // A0A1S3SHX4 // A0A1S3R659 // A0A1S3QAD3 // A0A1S3Q9E3 // A0A1S3MF23 // A0A1S3MF21 // A0A1S3MNE5 // B5X847 // A0A1S3QBU6 // A0A1S3N1V0 // A0A1S3MS04 // A0A1S3PBL0 // A0A1S3QB03 // A0A1S3PZA1 // A0A1S3PZM8 // P49946 // P49947 // A0A1S3LB65 // B9EM15 // A0A1…
GO:0034622	BP	cellular macromolecular complex assembly	26	606	4.29043	759	65384	1.16083	3.69599	3.4e-08	1e-06	// B5X2M7 // C0HAE8 // C0H9I7 // B5XB66 // B9ENH4 // C0HBN6 // P84408 // B9ENB2 // B5X3R3 // B5X1W1 // B5DFV7 // B9EMD3 // B5X6H9 // B5X6J8 // B9ELQ9 // B9ELD5 // B5DGH9 // C0H8S8 // C0H9S0 // B5DGB6 // B5X4T2 // B9ENG2 // C0PU35 // B5DGD5 // B9EN25 // B5DG56	// A0A1S3M4J6 // A0A1S3NSS7 // B9EPU6 // A0A1S3RNG4 // B9EPK8 // B5X449 // A0A1S3L865 // A0A1S3SIT2 // A0A1S3SIT4 // C0HAZ6 // B5X9J4 // A0A1S3SU36 // A0A1S3LJH3 // B5XGF4 // B5XA52 // A0A1S3PQW4 // A0A1S3P197 // B5X7J0 // B5X8U5 // A0A1S3MLZ0 // A0A1S3RBG3 // B5X8F3 // A0A1S3QSA1 // A0A1S3RJ33 // A0A1S3LHV3 // A0A1S3S0C3 // A0A1S3LER8 // A0A1S3M9M5 // B5X5R2 // B5XC29 // A0A1S3ST02 // B9EQ04 // …
GO:0009123	BP	nucleoside monophosphate metabolic process	8	606	1.32013	235	65384	0.359415	3.673	0.0018	0.02	// B5X373 // B5DGM5 // C0H976 // B5DFU2 // C0HAG6 // B5X4D6 // B5XCA1 // B5XBZ7	// A0A1S3SRU1 // A0A1S3S795 // A0A1S3PSZ6 // A0A1S3T6P8 // A0A1S2X0C2 // A0A1S3LI38 // C0H976 // A0A1S3NLU5 // A0A1S3NLU6 // A0A1S3PJU2 // A0A1S3MM17 // A0A1S3QMQ1 // A0A1S3KJA5 // A0A1S3R6Y8 // A0A1S3PZF2 // A0A1S3S940 // A0A1S3MJE5 // A0A1S3P9N1 // A0A1S3P9I9 // A0A1S3MG06 // A0A1S3Q0L4 // A0A1S3KPP8 // A0A1S3RCF0 // A0A1S3LYD4 // A0A1S3NZP4 // A0A1S3NZP7 // A0A1S3RMI6 // A0A1S3MIB4 // A0A1S3LX…
GO:0042180	BP	cellular ketone metabolic process	26	606	4.29043	771	65384	1.17919	3.63846	4.6e-08	1.3e-06	// B5X1G4 // C0H9M4 // B5X423 // B5X340 // Q7T1N7 // B5X1V6 // C0HAI2 // B5X2Q5 // Q7ZZK9 // Q7ZZK8 // C0H820 // B5DGL3 // C0HA51 // C0PUL2 // B5X4R5 // C0H9U3 // B5DGS2 // B5XAM9 // C0PU77 // B5X485 // B5X1P3 // B5X4N7 // C0HBA2 // B5X837 // Q7ZZL0 // B5XB51	// A0A1S3MSE8 // A0A1S3MSE9 // B5X4R5 // A0A1S3RIQ4 // A0A1S3M2M9 // A0A1S3RM23 // B5XB51 // A0A1S3RTX1 // A0A1S3Q5S7 // A0A1S3N0K4 // A0A1S3L087 // C0H9M4 // A0A1S3P7Z9 // A0A1S3PLM1 // A0A1S3KL22 // A0A1S3KL23 // A0A1S3N2K1 // A0A1S3ME44 // C0H9P1 // B5XGF7 // A0A1S3RIX0 // A0A1S3KPC7 // A0A1S3MYK9 // A0A1S3RNL9 // A0A1S3PEJ9 // A0A1S3MUA3 // B5DGL3 // C0PU89 // A0A1S3P376 // B9EMU9 // A0A1S3KJ…
GO:0019538	BP	protein metabolic process	110	606	18.1518	3306	65384	5.05628	3.58995	6.7e-27	5.5e-24	// B5DGK7 // B5DGK9 // B9ELK0 // C0HBF1 // B5RI28 // C0H7M0 // B5DG02 // B5XGU1 // B5X6L7 // B5XDA7 // B5DGU9 // C0HAB0 // B5DGU5 // B5DGU4 // C0HAB6 // B5X2M8 // B5DG94 // B9ENG2 // B5XAG6 // B9EPF8 // B5XEW6 // C0HAC7 // C0H7H1 // B5X371 // B5DGV7 // B5DGV2 // B5DGV3 // A7KIL2 // B5X8X3 // B5X6N3 // B5X5S8 // B9EMD3 // C0H779 // B9EMS3 // B5X668 // B5DGW8 // B5XA06 // B5X6R2 // C0PUL2 // C0H8L4…	// B9EPU0 // A0A1S3NPT8 // B5X441 // B5X440 // B9EPU7 // A0A1S3Q9L2 // A0A1S3MGC5 // A0A1S3LZC5 // A0A1S3NA10 // A0A1S3P6Z5 // B5RI65 // B9EM04 // A0A1S3S8M2 // B5RI62 // C0HBF1 // C0HBF0 // A0A1S3KXH0 // B9EQ59 // A0A1S3N5L0 // A0A1S3R8T8 // A0A1S3SF11 // A0A1S3SF13 // A0A1S3SF12 // A0A1S3RQS6 // B5X599 // A0A1S3KVL6 // A0A1S3RDI1 // A0A1S3SZN7 // B5X841 // A0A1S3QCH0 // A0A1S3QCH2 // A0A1S3MSB2…
GO:0034621	BP	cellular macromolecular complex subunit organization	29	606	4.78548	881	65384	1.34742	3.55157	1.4e-08	4.5e-07	// B9ENG2 // C0HAE8 // C0H9I7 // B5XB66 // B9ENH4 // C0HBN6 // P84408 // B9ENB2 // B9EL07 // B5X3R3 // B5X1W1 // B5DFV7 // B9EMD3 // B5X6H9 // B5X6J8 // B5DGL1 // B9ELQ9 // B9ELD5 // B5DGH9 // B9ELH2 // C0H8S8 // C0H9S0 // B5DGB6 // B5X4T2 // B5X2M7 // C0PU35 // B5DGD5 // B9EN25 // B5DG56	// A0A1S3M4J6 // A0A1S3P571 // A0A1S3NSS7 // A0A1S3Q9L8 // A0A1S3RNG4 // A0A1S3Q9L4 // B5X449 // A0A1S3L865 // A0A1S3Q9L0 // A0A1S3STB6 // A0A1S3SIT2 // A0A1S3PLW1 // C0HAZ6 // B5X9J4 // A0A1S3SU36 // A0A1S3LJH3 // B5XCW2 // B9EPU6 // B5XGF4 // B5XA52 // A0A1S3MQR3 // A0A1S3PQW4 // A0A1S3P197 // B5X7J0 // B5X8U5 // B5DGL1 // A0A1S3MLZ0 // A0A1S3RBG3 // A0A1S3QNW0 // B5X8F3 // A0A1S3QSA1 // A0A1S3…
GO:0044248	BP	cellular catabolic process	48	606	7.92079	1469	65384	2.24673	3.52548	6.6e-13	4.7e-11	// B5XFH8 // B9EPN0 // C0H9M4 // B5X9F8 // Q2A665 // B5X9D0 // B5DGG1 // B5X8M1 // B5X0U6 // B5XB51 // B5XCL4 // B5DGU0 // B5XD66 // I0J1J2 // B5XA36 // C0H9I1 // B9EPH8 // B5XGI9 // I0J1J3 // B9EQ77 // B5DGS2 // B5X886 // B5DGU4 // B5XAG6 // C0H820 // B5DG42 // B5DGL3 // B5X6N3 // B5X6L7 // B5X1B5 // B5DGQ7 // B5XD19 // B5DGJ1 // C0H9U3 // B5DGU5 // B9EPR5 // B5XAM9 // B5X0R8 // C0PU77 // C0H856…	// A0A1S3QUL8 // B5X441 // B9EPU7 // A0A1S3QG24 // A0A1S3NDY3 // A0A1S3LSB6 // B9ELV6 // B9EQ59 // A0A1S3MZY9 // A0A1S3SF12 // A0A1S3RQS6 // A0A1S3RDI1 // A0A1S3MF22 // A0A1S3KVL3 // A0A1S3QCH0 // C0H9F4 // C0HB88 // A0A1S3RR12 // A0A1S3KHZ2 // A0A1S3MIQ1 // A0A1S3T3E6 // A0A1S3RAA9 // A0A1S3QTW1 // C0HAC0 // B5XG31 // A0A1S3LGS1 // A0A1S3LGS0 // A0A1S3SSF5 // A0A1S3LGS5 // A0A1S3LGS4 // A0A1S3SJ…
GO:0005975	BP	carbohydrate metabolic process	38	606	6.27063	1172	65384	1.79249	3.49828	1.6e-10	7.3e-09	// B5X371 // B9EPN0 // C0H9M4 // C0H7J1 // C0PUI9 // B5X0U6 // B5XB51 // I0J1J2 // I0J1J3 // B9ELT2 // C0HAA0 // C0HAI2 // C0H9I1 // B5X886 // C0HBH1 // B5DG80 // C0H820 // K4J7W7 // B5DGL3 // C0H9N4 // B5XE59 // C0PUF3 // Q2A665 // B5X1B5 // B5X4R2 // B5DGQ7 // C0HAB0 // B5DGU0 // C0H9U3 // C0HAB4 // B5XAM9 // B5X0R8 // B5X3K2 // B9EM17 // B5X4N7 // B5X1T5 // C0HBE4 // B5DFX8	// A0A1S3NAG1 // A0A1S3RF74 // A0A1S3LFV3 // A0A1S3NS95 // C0H7J1 // A0A1S3LGA6 // A0A1S3M9V7 // A0A1S3MRU2 // A0A1S3PLP3 // A0A1S3R491 // A0A1S3L2V2 // B5XB51 // A0A1S3LSB6 // A0A1S3Q5S7 // A0A1S3PZF6 // A0A1S3S8M2 // B5XE29 // A0A1S3P878 // A0A1S3RRG8 // B5X595 // A0A1S3LPY5 // A0A1S3KXH0 // A0A1S3M3G9 // A0A1S3KL20 // A0A1S3R8T8 // A0A1S3LED4 // B5XGF1 // A0A1S3SF13 // A0A1S3LK38 // A0A1S3SHX1…
GO:0044262	BP	cellular carbohydrate metabolic process	27	606	4.45545	834	65384	1.27554	3.49298	5.9e-08	1.6e-06	// B5X371 // B9EPN0 // C0H9M4 // C0H7J1 // B5X0U6 // B5XB51 // I0J1J2 // I0J1J3 // C0H9I1 // C0HAA0 // B5X886 // K4J7W7 // B5DGL3 // C0H9N4 // B5XE59 // Q2A665 // B5X1B5 // B5X4R2 // B5DGQ7 // C0HAB0 // B5DGU0 // C0H9U3 // B5X0R8 // B5X3K2 // B9EM17 // C0HBE4 // B5DFX8	// A0A1S3NAG1 // C0H9M4 // A0A1S3NS95 // C0H7J1 // A0A1S3LGA6 // A0A1S3M9V7 // A0A1S3R491 // A0A1S3LZC5 // B5XB51 // A0A1S3LSB6 // A0A1S3Q5S7 // A0A1S3PZF6 // A0A1S3S8M2 // B5XE29 // A0A1S3P878 // B5X595 // A0A1S3LPY5 // A0A1S3KXH0 // A0A1S3M3G9 // A0A1S3KL20 // A0A1S3R8T8 // A0A1S3SF11 // B5XGF1 // A0A1S3SF13 // A0A1S3LK38 // A0A1S3P877 // A0A1S3SZN7 // A0A1S3LPY0 // A0A1S3KPC9 // A0A1S3R9P0 // …
GO:0044267	BP	cellular protein metabolic process	103	606	16.9967	3189	65384	4.87734	3.48483	1.8e-24	9.6e-22	// B5DGK7 // B5DGK9 // B9ELK0 // C0HBF1 // C0H7M0 // B5DG02 // B5XGU1 // C0H9N4 // B5XDA7 // C0HAB0 // B5DGU5 // B5DGU4 // C0HAB6 // B5X2M8 // B5DG94 // B9ENG2 // B5XAG6 // B5XEW6 // C0H7H1 // B5X371 // B5DGV7 // B5DGV2 // B5DGV3 // A7KIL2 // B5X8X3 // B5X6N3 // B5X5S8 // B9EMD3 // C0H779 // B9EMS3 // B5X668 // B5DGW8 // B5XA06 // B5X6R2 // C0PUL2 // C0H8L4 // B9ELY8 // B5XGP5 // B5RI17 // C0HBK7…	// B9EPU0 // A0A1S3NPT8 // B5X441 // B5X440 // B9EPU7 // A0A1S3Q9L2 // A0A1S3MGC5 // A0A1S3LZC5 // A0A1S3NA10 // A0A1S3P6Z5 // B5RI65 // B9EM04 // A0A1S3S8M2 // B5RI62 // C0HBF1 // C0HBF0 // A0A1S3KXH0 // B9EQ59 // A0A1S3R8T8 // A0A1S3SF11 // A0A1S3SF13 // A0A1S3SF12 // A0A1S3RQS6 // B5X599 // A0A1S3KVL6 // A0A1S3RDI1 // A0A1S3SZN7 // B5X841 // A0A1S3QCH0 // A0A1S3QCH2 // A0A1S3MSB2 // A0A1S3MSB1…
GO:0044281	BP	small molecule metabolic process	78	606	12.8713	2463	65384	3.76698	3.41687	8.5e-19	2e-16	// B5X373 // B5X1G4 // B5DG78 // B9EPN0 // C0H9M4 // P68529 // C0H7J1 // B5X1E5 // C0HAG6 // B5X1C6 // C0H9G2 // B5X6S0 // B5X4D6 // B5X0U6 // B5XB51 // B5DGM5 // I0J1J2 // I0J1J3 // C0H9I1 // B5X340 // Q7T1N7 // B5XCJ8 // B5X4N7 // C0HA51 // B5DGC9 // C0HAI2 // B5X0S0 // B5DGE0 // B5DGS2 // B5X886 // C0HAA0 // C0H820 // B5X3F7 // B5XD97 // Q7ZZK9 // Q7ZZK8 // B5XCA1 // B5X0R8 // K4J7W7 // B5X3C0…	// A0A1S3QDX4 // A0A1S3N0A3 // A0A1S3NI26 // A0A1S3Q5Y4 // A0A1S3MP04 // A0A1S3MSE8 // A0A1S3LSB6 // A0A1S3LME1 // A0A1S3R6Y8 // C0H9M4 // B5X597 // B5X0Q7 // A0A1S3KP55 // A0A1S3PPW1 // A0A1S3LVB7 // C0PU89 // C0H9F4 // A0A1S3KJB2 // A0A1S3N7Y1 // A0A1S3QF15 // A0A1S3QPG7 // B5X205 // B5X5R6 // A0A1S3S977 // A0A1S3S970 // A0A1S3MTH5 // A0A1S3MIQ1 // A0A1S3R2A6 // A0A1S3S979 // A0A1S3R401 // A0A1…
GO:0051603	BP	proteolysis involved in cellular protein catabolic process	19	606	3.13531	634	65384	0.969656	3.23343	1.4e-05	0.00031	// C0H856 // B5X8M1 // B5X9F8 // B5X6N3 // B5XGP5 // B5X9D0 // B5XFH8 // B5DGU4 // B5XGI9 // B5DGG1 // B5XAG6 // B5RI58 // B5XCL4 // B5XD66 // B5DGJ1 // B5DG53 // B5DGU5 // B9EPR5 // B9EQ77	// A0A1S3SXI2 // B5XAL3 // A0A1S3P478 // B9EPU7 // A0A1S3MDV4 // A0A1S3RTX4 // A0A1S3KMG9 // A0A1S3M1W8 // B5XC96 // A0A1S3QX88 // A0A1S3NQV8 // A0A1S3L946 // B5XA59 // A0A1S3SF12 // A0A1S3RQS6 // B5XA50 // A0A1S3RDI1 // A0A1S3PDQ4 // A0A1S3MUA9 // B5XFW6 // A0A1S3QCH0 // A0A1S3PYN0 // A0A1S3KHZ2 // A0A1S3RE52 // A0A1S3LD63 // A0A1S3LER3 // A0A1S3KT49 // A0A1S3LD68 // A0A1S3PV72 // A0A1S3QZD1 // …
GO:0044257	BP	cellular protein catabolic process	19	606	3.13531	634	65384	0.969656	3.23343	1.4e-05	0.00031	// C0H856 // B5X8M1 // B5X9F8 // B5X6N3 // B5XGP5 // B5X9D0 // B5XFH8 // B5DGU4 // B5XGI9 // B5DGG1 // B5XAG6 // B5RI58 // B5XCL4 // B5XD66 // B5DGJ1 // B5DG53 // B5DGU5 // B9EPR5 // B9EQ77	// A0A1S3SXI2 // B5XAL3 // A0A1S3P478 // B9EPU7 // A0A1S3MDV4 // A0A1S3RTX4 // A0A1S3KMG9 // A0A1S3M1W8 // B5XC96 // A0A1S3QX88 // A0A1S3NQV8 // A0A1S3L946 // B5XA59 // A0A1S3SF12 // A0A1S3RQS6 // B5XA50 // A0A1S3RDI1 // A0A1S3PDQ4 // A0A1S3MUA9 // B5XFW6 // A0A1S3QCH0 // A0A1S3PYN0 // A0A1S3KHZ2 // A0A1S3RE52 // A0A1S3LD63 // A0A1S3LER3 // A0A1S3KT49 // A0A1S3LD68 // A0A1S3PV72 // A0A1S3QZD1 // …
GO:0044271	BP	cellular nitrogen compound biosynthetic process	10	606	1.65017	345	65384	0.527652	3.12737	0.0017	0.019	// B5DFU2 // C0HAG6 // B9EPV2 // B5X3E6 // B5X423 // B5DGF0 // B5X2Q5 // B5X837 // C0HBA2 // B5XBZ7	// A0A1S3MB92 // A0A1S3MB97 // A0A1S3PSZ6 // A0A1S3M2M9 // B5X4F2 // A0A1S3NL90 // A0A1S3T1H9 // B5XGF7 // A0A1S3RWX3 // C0PU89 // A0A1S3NJT5 // A0A1S3LI09 // A0A1S3KJB2 // C0H8Q7 // B5X5R6 // B5X2T1 // A0A1S3KTP9 // C0HBA2 // A0A1S3KY97 // A0A1S3KK23 // A0A1S3L8G8 // B5DGE7 // A0A1S3MEA3 // A0A1S3T1G7 // B5X837 // A0A1S3RHL7 // A0A1S3L1E6 // A0A1S3KIX0 // A0A1S3PWI0 // A0A1S3LIP2 // B5X1V7 // A0…
GO:0044283	BP	small molecule biosynthetic process	15	606	2.47525	520	65384	0.795302	3.11234	0.00015	0.0022	// B5DGL3 // C0H9M4 // B5DFU2 // B5X0S0 // B5X1E5 // C0HAG6 // B5X423 // C0HBA2 // B5XB51 // B5X837 // B5DGF0 // B5XBZ7 // B5XE59 // C0HBE4 // B5X2Q5	// A0A1S3MSE8 // A0A1S3MSE9 // C0H9M4 // A0A1S3PSZ6 // A0A1S3R491 // B5XB51 // A0A1S3Q5S7 // A0A1S3P878 // A0A1S3KL22 // A0A1S3KL23 // A0A1S3N2K1 // A0A1S3P877 // A0A1S3RIX0 // A0A1S3KUT1 // A0A1S3MYK9 // A0A1S3RWX3 // B5DGL3 // C0PU89 // A0A1S3RAJ4 // B9EMU9 // A0A1S3KJB2 // A0A1S3NAX8 // C0H8Q7 // B5X5R6 // B5X2T1 // A0A1S3PV75 // A0A1S3KTP9 // A0A1S3P6Y2 // C0PU79 // B5XFE7 // B5X3X6 // C0HBA2…
GO:0006511	BP	ubiquitin-dependent protein catabolic process	16	606	2.64026	555	65384	0.848832	3.11047	9.6e-05	0.0015	// B5X8M1 // B5X9F8 // B5X6N3 // B5XGP5 // B5XFH8 // B5DGU4 // B5XGI9 // B5DGG1 // B5XAG6 // B5XCL4 // B5RI58 // B5DGJ1 // B5DG53 // B5DGU5 // B9EPR5 // B9EQ77	// A0A1S3SXI2 // B5XAL3 // A0A1S3P478 // B9EPU7 // A0A1S3MDV4 // A0A1S3RTX4 // A0A1S3KMG9 // A0A1S3M1W8 // B5XC96 // A0A1S3QX88 // A0A1S3NQV8 // A0A1S3L946 // B5XA59 // A0A1S3SF12 // A0A1S3RQS6 // B5XA50 // A0A1S3RDI1 // A0A1S3MUA9 // A0A1S3QCH0 // A0A1S3RE52 // A0A1S3LD63 // A0A1S3LER3 // A0A1S3LD68 // A0A1S3PV72 // A0A1S3QZD1 // A0A1S3NUQ9 // B9EM13 // A0A1S3RY51 // A0A1S3P4K8 // A0A1S3KU83 // …
GO:0019941	BP	modification-dependent protein catabolic process	16	606	2.64026	557	65384	0.85189	3.0993	0.0001	0.0015	// B5X8M1 // B5X9F8 // B5X6N3 // B5XGP5 // B5XFH8 // B5DGU4 // B5XGI9 // B5DGG1 // B5XAG6 // B5XCL4 // B5RI58 // B5DGJ1 // B5DG53 // B5DGU5 // B9EPR5 // B9EQ77	// A0A1S3SXI2 // B5XAL3 // A0A1S3P478 // B9EPU7 // A0A1S3MDV4 // A0A1S3RTX4 // A0A1S3KMG9 // A0A1S3M1W8 // B5XC96 // A0A1S3QX88 // A0A1S3NQV8 // A0A1S3L946 // B5XA59 // A0A1S3SF12 // A0A1S3RQS6 // B5XA50 // A0A1S3RDI1 // A0A1S3MUA9 // A0A1S3QCH0 // A0A1S3RE52 // A0A1S3LD63 // A0A1S3LER3 // A0A1S3LD68 // A0A1S3PV72 // A0A1S3QZD1 // A0A1S3NUQ9 // B9EM13 // A0A1S3RY51 // A0A1S3P4K8 // A0A1S3KU83 // …
GO:0043632	BP	modification-dependent macromolecule catabolic process	16	606	2.64026	557	65384	0.85189	3.0993	0.0001	0.0015	// B5X8M1 // B5X9F8 // B5X6N3 // B5XGP5 // B5XFH8 // B5DGU4 // B5XGI9 // B5DGG1 // B5XAG6 // B5XCL4 // B5RI58 // B5DGJ1 // B5DG53 // B5DGU5 // B9EPR5 // B9EQ77	// A0A1S3SXI2 // B5XAL3 // A0A1S3P478 // B9EPU7 // A0A1S3MDV4 // A0A1S3RTX4 // A0A1S3KMG9 // A0A1S3M1W8 // B5XC96 // A0A1S3QX88 // A0A1S3NQV8 // A0A1S3L946 // B5XA59 // A0A1S3SF12 // A0A1S3RQS6 // B5XA50 // A0A1S3RDI1 // A0A1S3MUA9 // A0A1S3QCH0 // A0A1S3RE52 // A0A1S3LD63 // A0A1S3LER3 // A0A1S3LD68 // A0A1S3PV72 // A0A1S3QZD1 // A0A1S3NUQ9 // B9EM13 // A0A1S3RY51 // A0A1S3P4K8 // A0A1S3KU83 // …
GO:0006732	BP	coenzyme metabolic process	11	606	1.81518	399	65384	0.610241	2.97453	0.0016	0.017	// B5X485 // B5X1E5 // B9EM17 // B5X3C0 // B5X0X6 // C0H820 // B5X4R5 // B9EPN0 // C0H9U3 // B5DGS2 // B5XAM9	// A0A1S3MSE8 // A0A1S3LSD9 // B5XF85 // A0A1S3MB92 // A0A1S3MB97 // A0A1S3RIQ4 // A0A1S3RTX1 // A0A1S3MIZ7 // A0A1S3Q5S5 // A0A1S3N2K1 // A0A1S3PPW1 // A0A1S3KUT1 // A0A1S3PEJ9 // A0A1S3LE56 // A0A1S3SGM1 // B9EM17 // C0PU79 // B5X0X6 // A0A1S3NRA9 // A0A1S3P282 // A0A1S3QTW1 // A0A1S3R8S7 // A0A1S3NYB1 // A0A1S3NYB2 // A0A1S3SII5 // A0A1S3NJY0 // A0A1S3LGS5 // A0A1S3S3S9 // A0A1S3LSL2 // A0A1S3…
GO:0006508	BP	proteolysis	19	606	3.13531	699	65384	1.06907	2.93275	5e-05	0.00094	// C0H856 // B5X8M1 // B5X9F8 // B5X6N3 // B5XGP5 // B5X9D0 // B5XFH8 // B5DGU4 // B5XGI9 // B5DGG1 // B5XAG6 // B5RI58 // B5XCL4 // B5XD66 // B5DGJ1 // B5DG53 // B5DGU5 // B9EPR5 // B9EQ77	// A0A1S3SXI2 // B5XAL3 // B5XAV2 // B9EPU7 // A0A1S3MDV4 // B5XB55 // A0A1S3RTX4 // A0A1S3KMG9 // A0A1S3M1W8 // B5XC96 // A0A1S3QX88 // A0A1S3NQV8 // A0A1S3L946 // B5XA59 // A0A1S3SH05 // A0A1S3SF12 // A0A1S3RQS6 // B5XA50 // A0A1S3RDI1 // A0A1S3PDQ4 // A0A1S3SH07 // A0A1S3MUA9 // B5XFW6 // A0A1S3QCH0 // A0A1S3PYN0 // B5XAQ8 // A0A1S3KHZ2 // A0A1S3RE52 // A0A1S3LD63 // A0A1S3LER3 // A0A1S3KT49 /…
GO:0051186	BP	cofactor metabolic process	12	606	1.9802	481	65384	0.735654	2.69175	0.0022	0.024	// B5X485 // B5XEX1 // B5X1E5 // B9EM17 // B5X3C0 // B5X0X6 // C0H820 // B5X4R5 // B9EPN0 // C0H9U3 // B5DGS2 // B5XAM9	// A0A1S3L755 // A0A1S3MSE8 // A0A1S3LSD9 // B5XF85 // A0A1S3MB92 // A0A1S3MB97 // A0A1S3RIQ4 // A0A1S3RTX1 // A0A1S3MIZ7 // A0A1S3Q5S5 // A0A1S3N2K1 // A0A1S3PPW1 // A0A1S3KUT1 // A0A1S3PEJ9 // A0A1S3LE56 // A0A1S3LI09 // A0A1S3SGM1 // B5X5R6 // B9EM17 // C0PU79 // B5X0X6 // A0A1S3NRA9 // A0A1S3P282 // A0A1S3QTW1 // A0A1S3R8S7 // A0A1S3PI78 // A0A1S3Q4Z5 // A0A1S3NYB1 // A0A1S3NYB2 // A0A1S3SII5…
GO:0044085	BP	cellular component biogenesis	38	606	6.27063	1528	65384	2.33696	2.68324	1.6e-07	4.2e-06	// B5X2M7 // C0H9F2 // C0HAE8 // B5XFD6 // C0H9I5 // C0H9I7 // B5DGD5 // B9ENH4 // C0HBN6 // P84408 // B9ENB2 // B5X4Q1 // C0H8G4 // B5X3R3 // B5X1W1 // B5DFV7 // B5XDP1 // B9EMD3 // B5X6H9 // B5X6J8 // B9ELQ9 // B9ELD5 // C0H9F5 // B5X300 // B5DGH9 // C0H8S8 // C0H9S0 // C7C4W8 // B5DGB6 // B5X4T2 // B9ENG2 // C0PU35 // B5XB66 // B9EN25 // B5X4H4 // B5DG12 // C0HBE6 // B5DG56	// A0A1S3QMM5 // B9EPU6 // A0A1S3SUC3 // B5X449 // A0A1S3LCY7 // A0A1S3P6R5 // B5X9J4 // B9EQ58 // B9EPH6 // C0H9S0 // A0A1S3LQ97 // A0A1S3RBG3 // B5X8F3 // C0H9F5 // A0A1S3RQE9 // C0H9F2 // A0A1S3RR14 // B5X5R2 // A0A1S3R409 // A0A1S3PFL3 // A0A1S3RUU8 // A0A1S3LWZ7 // A0A1S3LAU1 // A0A1S3S9A8 // A0A1S3S9A9 // A0A1S3S9A6 // A0A1S3S9A7 // A0A1S3S9A4 // A0A1S3S9A5 // A0A1S3S9A2 // A0A1S3S9A1 // A0…
GO:0030036	BP	actin cytoskeleton organization	22	606	3.63036	920	65384	1.40707	2.58008	8.9e-05	0.0014	// C0HBR6 // B5XFD6 // C0H8E0 // C0H9I5 // C0HBN6 // B5XB79 // C0H9C8 // B5DGL1 // C0H9F2 // B5XAM0 // B9ELH2 // C0H9H2 // C0H8S8 // C7C4W8 // B5X4T2 // B5X2M7 // C0PU35 // B5DGD5 // B5X3R3 // B5X427 // C0HBE5 // B5DG56	// A0A1S3M7W0 // A0A1S3QMM5 // A0A1S3N6S8 // A0A1S3Q9L8 // B9ELX6 // A0A1S3Q9L4 // A0A1S3Q9L0 // A0A1S3SAF0 // A0A1S3QLG5 // A0A1S3MGC3 // A0A1S3PMJ3 // A0A1S3RKM1 // A0A1S3PA03 // A0A1S3R715 // A0A1S3LME4 // A0A1S3KL27 // A0A1S3SCF3 // A0A1S3SCF4 // C0HBF5 // A0A1S3RKC4 // A0A1S3SCF9 // A0A1S3SI04 // A0A1S3KM82 // A0A1S3MQR3 // A0A1S3RG30 // A0A1S3P4J4 // B5X7J0 // A0A1S3LCP8 // B5X7J3 // A0A1S3…
GO:0030029	BP	actin filament-based process	22	606	3.63036	947	65384	1.44837	2.50652	0.00013	0.002	// C0HBR6 // B5XFD6 // C0H8E0 // C0H9I5 // C0HBN6 // B5XB79 // C0H9C8 // B5DGL1 // C0H9F2 // B5XAM0 // B9ELH2 // C0H9H2 // C0H8S8 // C7C4W8 // B5X4T2 // B5X2M7 // C0PU35 // B5DGD5 // B5X3R3 // B5X427 // C0HBE5 // B5DG56	// A0A1S3M7W0 // A0A1S3QMM5 // A0A1S3N6S8 // A0A1S3Q9L8 // B9ELX6 // A0A1S3Q9L4 // A0A1S3M4J8 // A0A1S3Q9L0 // A0A1S3SAF0 // A0A1S3QLG5 // A0A1S3MGC3 // A0A1S3PMJ3 // A0A1S3RKM1 // A0A1S3PA03 // A0A1S3R715 // A0A1S3LME4 // A0A1S3KL27 // A0A1S3SCF3 // A0A1S3SCF4 // C0HBF5 // A0A1S3RKC4 // A0A1S3SCF9 // A0A1S3SI04 // A0A1S3KM82 // A0A1S3MQR3 // A0A1S3RG30 // A0A1S3P4J4 // B5X7J0 // A0A1S3LCP8 // B5…
GO:0043933	BP	macromolecular complex subunit organization	29	606	4.78548	1262	65384	1.93014	2.47935	1.7e-05	0.00036	// B9ENG2 // C0HAE8 // C0H9I7 // B5XB66 // B9ENH4 // C0HBN6 // P84408 // B9ENB2 // B9EL07 // B5X3R3 // B5X1W1 // B5DFV7 // B9EMD3 // B5X6H9 // B5X6J8 // B5DGL1 // B9ELQ9 // B9ELD5 // B5DGH9 // B9ELH2 // C0H8S8 // C0H9S0 // B5DGB6 // B5X4T2 // B5X2M7 // C0PU35 // B5DGD5 // B9EN25 // B5DG56	// A0A1S3PEC8 // A0A1S3M4J6 // A0A1S3NAG0 // A0A1S3P571 // A0A1S3NSS7 // A0A1S3Q9L8 // A0A1S3RNG4 // A0A1S3Q9L4 // B5X449 // A0A1S3L865 // A0A1S3Q9L0 // A0A1S3RSE3 // A0A1S3LCY7 // A0A1S3SIT2 // A0A1S3RJ29 // A0A1S3PLW1 // C0HAZ6 // B5X9J4 // A0A1S3LFL4 // A0A1S3KRK6 // A0A1S3PYJ5 // A0A1S3RL79 // A0A1S3LJH3 // A0A1S3R654 // B5X4U0 // B9EPU6 // B5XGF4 // B5XA52 // A0A1S3MQR3 // A0A1S3PQW4 // A0A1…
GO:0065003	BP	macromolecular complex assembly	26	606	4.29043	1145	65384	1.75119	2.45	5.2e-05	0.00094	// B5X2M7 // C0HAE8 // C0H9I7 // B5XB66 // B9ENH4 // C0HBN6 // P84408 // B9ENB2 // B5X3R3 // B5X1W1 // B5DFV7 // B9EMD3 // B5X6H9 // B5X6J8 // B9ELQ9 // B9ELD5 // B5DGH9 // C0H8S8 // C0H9S0 // B5DGB6 // B5X4T2 // B9ENG2 // C0PU35 // B5DGD5 // B9EN25 // B5DG56	// A0A1S3PEC8 // A0A1S3M4J6 // A0A1S3NAG0 // A0A1S3NSS7 // B9EPU6 // A0A1S3RNG4 // B9EPK8 // B5X449 // A0A1S3L865 // A0A1S3RFA5 // A0A1S3RSE3 // A0A1S3LCY7 // A0A1S3SIT2 // A0A1S3SIT4 // C0HAZ6 // B5X9J4 // A0A1S3LFL4 // A0A1S3KRK6 // A0A1S3PYJ5 // A0A1S3RL79 // A0A1S3LJH3 // A0A1S3R654 // B5X4U0 // B5XGF4 // B5XA52 // A0A1S3PQW4 // A0A1S3P197 // A0A1S3P194 // B5X7J0 // A0A1S3PKY4 // A0A1S3QWR5 /…
GO:0022607	BP	cellular component assembly	31	606	5.11551	1412	65384	2.15955	2.36879	2.1e-05	0.00044	// B5X2M7 // C0HAE8 // B5XFD6 // C0H9I5 // C0H9I7 // B5XB66 // B9ENH4 // C0HBN6 // P84408 // B9ENB2 // B5X3R3 // B5X1W1 // B5DFV7 // B9EMD3 // B5X6H9 // B5X6J8 // B9ELQ9 // B9ELD5 // C0H9F5 // C0H9F2 // B5DGH9 // C0H8S8 // C0H9S0 // C7C4W8 // B5DGB6 // B5X4T2 // B9ENG2 // C0PU35 // B5DGD5 // B9EN25 // B5DG56	// A0A1S3QMM5 // B9EPU6 // A0A1S3SUC3 // B5X449 // A0A1S3LCY7 // B5X9J4 // B9EQ58 // C0H9S0 // A0A1S3LQ97 // A0A1S3RBG3 // B5X8F3 // C0H9F5 // A0A1S3RQE9 // C0H9F2 // A0A1S3RR14 // B5X5R2 // A0A1S3R409 // A0A1S3PFL3 // A0A1S3RUU8 // A0A1S3LWZ7 // A0A1S3LAU1 // A0A1S3S9A8 // A0A1S3S9A9 // A0A1S3S9A6 // A0A1S3S9A7 // A0A1S3S9A4 // A0A1S3S9A5 // A0A1S3S9A2 // A0A1S3S9A1 // A0A1S3LN22 // A0A1S3RKY9 /…
GO:0065008	BP	regulation of biological quality	30	606	4.9505	1402	65384	2.14426	2.30872	4.4e-05	0.00089	// C0PUP1 // B5X6M7 // B5X291 // B5X9Q1 // B5X3C0 // B5X8H5 // B5X9L4 // C0HBN6 // C0H8V6 // C0HBF4 // B5X5Q6 // B5X1H7 // B5XCD1 // A0A0G3B776 // B5DGD1 // C0HB63 // B5X348 // B5XD19 // B5RIB0 // C0H8S8 // D0QEL0 // B5X1P6 // B5X4T2 // B5X489 // B5X2M7 // C0PU35 // B5X3R3 // C0PU58 // B5X7X7 // B5DG56	// A0A1S3LSB6 // A0A1S3LSB9 // A0A1S3LME5 // A0A1S3KXH2 // A0A1S3KXH3 // A0A1S3QAD3 // A0A1S3MF23 // A0A1S3MF21 // B5X847 // A0A1S3Q4N4 // A0A1S3R7G7 // A0A1S3RBG3 // A0A1S3N1V0 // A0A1S3QNW0 // A0A1S3PBL4 // A0A1S3PBL0 // A0A1S3PZM8 // P49946 // P49947 // B5X5R2 // A0A1S3RSI1 // A0A1S3SHA9 // A0A1S3MVD8 // A0A1S3PXQ0 // A0A1S3LAU1 // C0HAC0 // A0A1S3LLA1 // A0A1S3R9B0 // A0A1S3QVM0 // A0A1S3L4X2…
GO:0044238	BP	primary metabolic process	215	606	35.4785	10642	65384	16.2762	2.17979	1.8e-20	6e-18	// B5DGK7 // B9EPN0 // C0H9M4 // C0H7J1 // B5DGK9 // B5X1C6 // C0PUI9 // B9ELK0 // B5XB51 // B5X1G4 // C0HAA0 // C0HBF1 // C0H7E8 // B9EPQ0 // P68529 // B5DGC9 // C0HAI2 // B9EPT4 // B5DGC6 // B5DG80 // B5RI28 // C0H7M0 // B5DG02 // B5XD97 // C0HAF8 // B9EQ66 // B5XGU1 // B5DGL3 // C0H9N4 // B5X369 // B5XE35 // B5XG35 // C0HAB0 // B5DGU0 // B5X3C0 // B5DGU5 // B5DGU4 // C0HAB6 // C0PU77 // B5X2M8…	// A0A1S3PJM7 // A0A1S3S8M2 // A0A1S3KXH5 // C0HBF1 // A0A1S3RBU5 // A0A1S3KXH0 // C0HBF6 // A0A1S3KXH2 // A0A1S3RQS6 // A0A1S3MF27 // A0A1S3LLZ4 // A0A1S3LQ97 // A0A1S3LVB7 // A0A1S3MF29 // A0A1S3QNW5 // A0A1S3LM37 // A0A1S3LM30 // A0A1S3QNW3 // A0A1S3NF09 // B5XGH2 // A0A1S3KJB2 // B5X8F5 // B5X207 // B5X205 // A0A1S3NF04 // B5X201 // A0A1S3LBR6 // A0A1S3MTH5 // A0A1S3RSI5 // A0A1S3RQ86 // A0A1…
GO:0008152	BP	metabolic process	241	606	39.769	12382	65384	18.9374	2.10003	1.7e-20	6e-18	// B5DGK7 // B9EPN0 // C0H9M4 // C0H7J1 // B5XBZ7 // B5DGK9 // B5X1C6 // C0PUI9 // U5KQM7 // B9ELK0 // B5XB51 // B5X1G4 // C0HAA0 // B5XE16 // C0HBF1 // C0H7E8 // B9EPQ0 // P68529 // B5DGC9 // C0HAI2 // B9EPT4 // B5DGC6 // B5X6M7 // B5XGF6 // B5RI28 // C0H7M0 // B5DG02 // B5XD97 // C0HDF3 // C0HAF8 // B9EQ66 // B5XGU1 // B5DGL3 // A0A0G3B776 // C0PUJ3 // C0H9N4 // B5X369 // B9EPV2 // B5X767 // B5…	// A0A1S3QDX6 // A0A1S3QDX4 // A0A1S3NPT8 // A0A1S3QG24 // A0A1S3PJM7 // A0A1S3S8M2 // A0A1S3KXH5 // C0HBF1 // C0HBF0 // A0A1S3KXH0 // C0HBF6 // A0A1S3KXH2 // C0H9S3 // A0A1S3RQS6 // A0A1S3MF27 // A0A1S3MF22 // A0A1S3LLZ4 // A0A1S3LQ97 // A0A1S3LVB7 // A0A1S3MF29 // A0A1S3NZJ4 // A0A1S3QNW5 // A0A1S3LM37 // A0A1S3LM30 // A0A1S3QNW3 // A0A1S3NF09 // B5XGH2 // A0A1S3KJB2 // B5X8F5 // B5X207 // B5X2…
GO:0044237	BP	cellular metabolic process	217	606	35.8086	11323	65384	17.3177	2.06775	2.7e-18	4.8e-16	// B5DGK7 // B9EPN0 // C0H9M4 // C0H7J1 // B5XBZ7 // B5DGK9 // B5X1C6 // B9ELK0 // B5XB51 // C0HAA0 // B5XE16 // C0HBF1 // C0H7E8 // B9EPQ0 // P68529 // B5DGC9 // C0HAI2 // B9EPT4 // B5DGC6 // B5XGF6 // C0H7M0 // B5DG02 // B5XD97 // C0HAF8 // B9EQ66 // B5XGU1 // B5DGL3 // C0H9N4 // B5X369 // B9EPV2 // B5X767 // B5XE35 // B5XG35 // C0HAB0 // B5DGU0 // B5X3C0 // B5DGU5 // B5DGU4 // C0HAB6 // C0PU77…	// A0A1S3QDX6 // A0A1S3QDX4 // A0A1S3NPT8 // A0A1S3QG24 // A0A1S3PJM7 // A0A1S3S8M2 // A0A1S3KXH5 // C0HBF1 // C0HBF0 // A0A1S3KXH0 // C0HBF6 // A0A1S3KXH2 // A0A1S3RQS6 // A0A1S3MF27 // A0A1S3MF22 // A0A1S3LLZ4 // A0A1S3LQ97 // A0A1S3MF29 // A0A1S3NZJ4 // A0A1S3QNW5 // A0A1S3LM37 // A0A1S3LM30 // A0A1S3QNW3 // A0A1S3NF09 // B5XGH2 // A0A1S3KJB2 // B5X8F5 // B5X207 // B5X205 // A0A1S3NF04 // B5X2…
GO:0043170	BP	macromolecule metabolic process	161	606	26.5677	8557	65384	13.0873	2.03003	4.9e-14	4.2e-12	// B5DGK7 // B9EPN0 // C0H9M4 // B5DGK9 // B9ELK0 // B5XB51 // C0HBF1 // C0H7E8 // B9EPQ0 // C0HAB4 // B5RI28 // C0H7M0 // B5DG02 // C0HAF8 // B5XGU1 // B5DGL3 // C0PUJ3 // C0H9N4 // B5XDA7 // B5DGU9 // C0HAB0 // B5DGU0 // B5DGU5 // B5DGU4 // C0HAB6 // B5X2M8 // B5X3K2 // B5DG94 // B9ENG2 // B5X1B5 // B5XAG6 // B9EPF8 // B5X4N1 // B5XEW6 // C0HAC7 // C0H7H1 // B5X371 // B9EM17 // B5DGV2 // B5DGV3…	// A0A1S3PJM7 // A0A1S3S8M2 // A0A1S3KXH5 // C0HBF1 // C0HBF0 // A0A1S3KXH0 // C0HBF6 // A0A1S3KXH2 // A0A1S3RQS6 // A0A1S3MF27 // A0A1S3LQ97 // A0A1S3MF29 // A0A1S3QNW5 // A0A1S3LM37 // A0A1S3LM30 // A0A1S3QNW3 // A0A1S3NF09 // B5XGH2 // B5X8F1 // B5X8F5 // B5X207 // A0A1S3NF04 // B5X201 // A0A1S3LBR6 // A0A1S3RSI8 // A0A1S3RSI5 // A0A1S3RSI2 // A0A1S3M8G3 // A0A1S3R396 // A0A1S3Q7H3 // A0A1S3T5…
GO:0044260	BP	cellular macromolecule metabolic process	151	606	24.9175	8216	65384	12.5658	1.98297	1.1e-12	7.8e-11	// B5DGK7 // B9EPN0 // C0H9M4 // B5DGK9 // B9ELK0 // B5XB51 // C0HBF1 // C0H7E8 // B9EPQ0 // C0H7M0 // B5DG02 // C0HAF8 // B5XGU1 // B5DGL3 // C0H9N4 // B5XDA7 // C0HAB0 // B5DGU0 // B5DGU5 // B5DGU4 // C0HAB6 // B5X2M8 // B5X3K2 // B5DG94 // B9ENG2 // B5X1B5 // B5XAG6 // B5X4N1 // B5XEW6 // C0H7H1 // B5X371 // B9EM17 // B5DGV2 // B5DGV3 // A7KIL2 // B5X8X3 // B5XDX1 // B9EPH8 // B9EPT4 // C0HA06…	// A0A1S3PJM7 // A0A1S3S8M2 // A0A1S3KXH5 // C0HBF1 // C0HBF0 // A0A1S3KXH0 // C0HBF6 // A0A1S3KXH2 // A0A1S3RQS6 // A0A1S3MF27 // A0A1S3LQ97 // A0A1S3MF29 // A0A1S3QNW5 // A0A1S3LM37 // A0A1S3LM30 // A0A1S3QNW3 // A0A1S3NF09 // B5XGH2 // B5X8F1 // B5X8F5 // B5X207 // A0A1S3NF04 // B5X201 // A0A1S3LBR6 // A0A1S3RSI8 // A0A1S3RSI5 // A0A1S3RSI2 // A0A1S3M8G3 // A0A1S3R396 // A0A1S3Q7H3 // A0A1S3T5…
GO:0044249	BP	cellular biosynthetic process	107	606	17.6568	5933	65384	9.07409	1.94585	2.3e-09	8.2e-08	// B5DGK7 // C0H9M4 // B5DGK9 // B9ELK0 // B5XB51 // C0H7E8 // B5DGC9 // B5DGC6 // C0H7M0 // B5DG02 // B5XGU1 // B5DGL3 // C0H9N4 // B5XDA7 // B9EPV2 // B5XE35 // C0HAB0 // B9ENG2 // C0HBA2 // B5X4N1 // B5X195 // B5XEW6 // B5X373 // C0H7H1 // B5X371 // B5DGV7 // B5DGM5 // B5DGV2 // B5DGV3 // A7KIL2 // B5X8X3 // B5X3E6 // B5XDX1 // C0H9G2 // B5X6S0 // B5X0S0 // B5X5S8 // B3SUD0 // C0H779 // B5XE59…	// A0A1S3S8M2 // A0A1S3KXH5 // A0A1S3KXH0 // C0HBF6 // A0A1S3MF27 // A0A1S3LQ97 // A0A1S3MF29 // A0A1S3QNW5 // A0A1S3LM37 // A0A1S3LM30 // A0A1S3QNW3 // A0A1S3NF09 // B5XGH2 // A0A1S3KJB2 // A0A1S3NF04 // B5X201 // A0A1S3QGC3 // A0A1S3RSI8 // A0A1S3RSI2 // A0A1S3R396 // A0A1S3Q7H3 // A0A1S3T5G1 // A0A1S3S378 // A0A1S3P2X9 // A0A1S3RAS3 // A0A1S3P2X2 // A0A1S3P2X7 // A0A1S3SQ66 // A0A1S3L9T9 // A0…
GO:0009058	BP	biosynthetic process	109	606	17.9868	6136	65384	9.38456	1.91664	3.5e-09	1.3e-07	// B5DGK7 // C0H9M4 // B5DGK9 // B9ELK0 // B5XB51 // C0H7E8 // B5DGC9 // B5DGC6 // C0H7M0 // B5DG02 // C0HDF3 // B5XGU1 // B5DGL3 // A0A0G3B776 // C0H9N4 // B5XDA7 // B9EPV2 // B5XE35 // C0HAB0 // B9ENG2 // C0HBA2 // B5X4N1 // B5X195 // B5XEW6 // B5X373 // C0H7H1 // B5X371 // B5DGV7 // B5DGM5 // B5DGV2 // B5DGV3 // A7KIL2 // B5X8X3 // B5X3E6 // B5XDX1 // C0H9G2 // B5X6S0 // B5X0S0 // B5X5S8 // B3…	// A0A1S3S8M2 // A0A1S3KXH5 // A0A1S3KXH0 // C0HBF6 // A0A1S3MF27 // A0A1S3LQ97 // A0A1S3LVB7 // A0A1S3MF29 // A0A1S3QNW5 // A0A1S3LM37 // A0A1S3LM30 // A0A1S3QNW3 // A0A1S3NF09 // B5XGH2 // A0A1S3KJB2 // B5X205 // A0A1S3NF04 // B5X201 // A0A1S3QGC3 // A0A1S3RSI8 // A0A1S3RSI2 // A0A1S3R396 // A0A1S3Q7H3 // A0A1S3T5G1 // A0A1S3S378 // A0A1S3P2X9 // A0A1S3RAS3 // A0A1S3P2X2 // A0A1S3P2X7 // A0A1S3…
GO:0010467	BP	gene expression	80	606	13.2013	5099	65384	7.79854	1.69279	1.9e-05	0.00041	// B5X8M2 // C0H7H1 // B9EMI7 // B5X2A4 // B5DGV2 // B5DGV3 // B5X7I1 // B5DGA8 // B5DGX5 // A7KIL2 // B5DGX3 // B5X8X3 // B5DGX1 // B5XDX1 // B5X771 // B9ELK0 // B5DGK9 // B9ENH4 // C0H9I7 // B9EPH8 // C0H7G0 // C0H7E8 // B9EPQ0 // B5X497 // C0HA06 // B5X4Q1 // B5XFQ0 // B5X5S8 // B5XDA7 // B5XA36 // B5XG87 // C0H7M0 // B5DG02 // B5DGJ6 // B5DG42 // B5X1W1 // B5DGK7 // C0H9S0 // B5XGU1 // C0H7L1…	// B9EPU0 // A0A1S3RMI1 // B5XC34 // A0A1S3LK00 // B9ELV8 // A0A1S3LZC7 // A0A1S3LCY7 // A0A1S3RU05 // A0A1S3MT38 // A0A1S3P6R5 // B5RI65 // B5X9J1 // A0A1S3LP47 // A0A1S3LME4 // A0A1S3N5L6 // A0A1S3KXH5 // B9ENF8 // A0A1S3MJW6 // C0HBF6 // A0A1S3N5L0 // A0A1S3LQZ5 // A0A1S3R8T6 // A0A1S3MAD6 // A0A1S3R8T3 // C0H773 // B5X599 // A0A1S3S6J4 // A0A1S3QP54 // B3SUD0 // A0A1S3N3P1 // A0A1S3QPN9 // A0…
GO:0034645	BP	cellular macromolecule biosynthetic process	71	606	11.7162	4736	65384	7.24336	1.6175	0.00018	0.0025	// B5X8M2 // C0H7H1 // B5X371 // B9EMI7 // B5X2A4 // B5DGV2 // B5DGV3 // B5X7I1 // B5DGA8 // B5DGX5 // A7KIL2 // B5DGX3 // B5X8X3 // B5DGX1 // B5XDX1 // B5X771 // B9ELK0 // B5DGK9 // B9ENH4 // C0H9I7 // C0H7G0 // C0H7E8 // B5X497 // B5XFQ0 // B5X5S8 // B5XDA7 // B5XG87 // C0H7M0 // B5DG02 // B5DG42 // B5X1W1 // B5DGK7 // C0H9S0 // B5XGU1 // C0H8L1 // B5X105 // B5X1G4 // B5X668 // C0H9N4 // B5DGY4…	// B9EPU0 // A0A1S3P8D4 // A0A1S3KPS0 // A0A1S3R0H5 // A0A1S3T5Z2 // B9ELV8 // A0A1S3LZC7 // A0A1S3LCY7 // A0A1S3M043 // A0A1S3MT38 // B5RI65 // B5X9J1 // A0A1S3S8M2 // B5RI62 // A0A1S3LME4 // A0A1S3N5L6 // A0A1S3KXH5 // B9ENF8 // A0A1S3MJW6 // A0A1S3KXH0 // C0HBF6 // A0A1S3R8T8 // A0A1S3SF11 // A0A1S3R8T6 // A0A1S3SF13 // A0A1S3R8T3 // C0H773 // B5X599 // A0A1S3S6J4 // A0A1S3MF27 // A0A1S3SZN7 /…
GO:0009059	BP	macromolecule biosynthetic process	71	606	11.7162	4752	65384	7.26783	1.61206	0.00019	0.0027	// B5X8M2 // C0H7H1 // B5X371 // B9EMI7 // B5X2A4 // B5DGV2 // B5DGV3 // B5X7I1 // B5DGA8 // B5DGX5 // A7KIL2 // B5DGX3 // B5X8X3 // B5DGX1 // B5XDX1 // B5X771 // B9ELK0 // B5DGK9 // B9ENH4 // C0H9I7 // C0H7G0 // C0H7E8 // B5X497 // B5XFQ0 // B5X5S8 // B5XDA7 // B5XG87 // C0H7M0 // B5DG02 // B5DG42 // B5X1W1 // B5DGK7 // C0H9S0 // B5XGU1 // C0H8L1 // B5X105 // B5X1G4 // B5X668 // C0H9N4 // B5DGY4…	// B9EPU0 // A0A1S3P8D4 // A0A1S3KPS0 // A0A1S3R0H5 // A0A1S3T5Z2 // B9ELV8 // A0A1S3LZC7 // A0A1S3LCY7 // A0A1S3M043 // A0A1S3MT38 // B5RI65 // B5X9J1 // A0A1S3S8M2 // B5RI62 // A0A1S3LME4 // A0A1S3N5L6 // A0A1S3KXH5 // B9ENF8 // A0A1S3MJW6 // A0A1S3KXH0 // C0HBF6 // A0A1S3R8T8 // A0A1S3SF11 // A0A1S3R8T6 // A0A1S3SF13 // A0A1S3R8T3 // C0H773 // B5X599 // A0A1S3S6J4 // A0A1S3MF27 // A0A1S3SZN7 /…
GO:0009987	BP	cellular process	324	606	53.4653	23418	65384	35.8161	1.49277	6.3e-09	2.2e-07	// B5DGK7 // C0PUP3 // C0PUP1 // B9EPN0 // C0H9M4 // C0H7J1 // B5X291 // B5XBZ7 // B5DGK9 // B5X1C6 // B5XBN1 // B5XE27 // B9ELK0 // B5X5B2 // B5XB51 // B5XA36 // C0HBN6 // P84408 // B5X4F0 // C0HBF1 // C0H7E8 // B9EPQ0 // B5X592 // B5DGC9 // C0HBF4 // B9EPT4 // B5DGC6 // B5XDP1 // B5XA53 // B5XGF6 // C0PU76 // C0H7M0 // B5DG02 // B5XD97 // C0HAE8 // C0HAF8 // B5X3S5 // B9EQ66 // B5XGU1 // B5X397…	// A0A1S3QDX6 // A0A1S3QDX4 // A0A1S3LYN0 // A0A1S3QDX9 // A0A1S3PLW5 // A0A1S3PLW0 // A0A1S3PLW1 // A0A1S3PLW3 // A0A1S3KXH5 // A0A1S3KXH0 // A0A1S3KXH2 // A0A1S3LQ98 // A0A1S3LQ97 // A0A1S3LQ95 // A0A1S3QNW8 // A0A1S3LM35 // A0A1S3LM34 // A0A1S3LM37 // A0A1S3QNW0 // A0A1S3QNW3 // B5X208 // B5X207 // B5X206 // B5X205 // B5X201 // A0A1S3Q7H3 // A0A1S3Q7H2 // A0A1S3T5G1 // A0A1S3S378 // C0H878 // …
GO:0070062	CC	extracellular vesicular exosome	13	606	2.14521	51	65384	0.0780007	27.5025	1.5e-15	5.3e-14	// B5X397 // B5DGE8 // B9EMH1 // B5X2M8 // B5X9F8 // C0HAI2 // C0HAL2 // B9EMS3 // B5DGD5 // B5DH02 // B5X3Q1 // B9ENP4 // B5X127	// B5XEF8 // B5X9F8 // B5X1S6 // B5X3E3 // B5X3E2 // B8YQA0 // B5X393 // B5X7W3 // C0HBN0 // B5X794 // B5X137 // B5DGE8 // C0HAI2 // B5X1Q9 // B5DG68 // B5X7S6 // B5X3Q1 // B5X431 // B5X4K4 // C0H7X9 // Q5K595 // B5X397 // B5XFY1 // B9EMS3 // B9EMH1 // B5X4C7 // C0H815 // B5XEI6 // Q9DDK2 // B5XCQ9 // B5X2X6 // B9ENP4 // B5X8S5 // B5XA62 // B5XGC1 // B5X127 // C0H8F9 // B9EN47 // B5X2M8 // B5X1I3…
GO:0043230	CC	extracellular organelle	13	606	2.14521	51	65384	0.0780007	27.5025	1.5e-15	5.3e-14	// B5X397 // B5DGE8 // B9EMH1 // B5X2M8 // B5X9F8 // C0HAI2 // C0HAL2 // B9EMS3 // B5DGD5 // B5DH02 // B5X3Q1 // B9ENP4 // B5X127	// B5XEF8 // B5X9F8 // B5X1S6 // B5X3E3 // B5X3E2 // B8YQA0 // B5X393 // B5X7W3 // C0HBN0 // B5X794 // B5X137 // B5DGE8 // C0HAI2 // B5X1Q9 // B5DG68 // B5X7S6 // B5X3Q1 // B5X431 // B5X4K4 // C0H7X9 // Q5K595 // B5X397 // B5XFY1 // B9EMS3 // B9EMH1 // B5X4C7 // C0H815 // B5XEI6 // Q9DDK2 // B5XCQ9 // B5X2X6 // B9ENP4 // B5X8S5 // B5XA62 // B5XGC1 // B5X127 // C0H8F9 // B9EN47 // B5X2M8 // B5X1I3…
GO:0065010	CC	extracellular membrane-bounded organelle	13	606	2.14521	51	65384	0.0780007	27.5025	1.5e-15	5.3e-14	// B5X397 // B5DGE8 // B9EMH1 // B5X2M8 // B5X9F8 // C0HAI2 // C0HAL2 // B9EMS3 // B5DGD5 // B5DH02 // B5X3Q1 // B9ENP4 // B5X127	// B5XEF8 // B5X9F8 // B5X1S6 // B5X3E3 // B5X3E2 // B8YQA0 // B5X393 // B5X7W3 // C0HBN0 // B5X794 // B5X137 // B5DGE8 // C0HAI2 // B5X1Q9 // B5DG68 // B5X7S6 // B5X3Q1 // B5X431 // B5X4K4 // C0H7X9 // Q5K595 // B5X397 // B5XFY1 // B9EMS3 // B9EMH1 // B5X4C7 // C0H815 // B5XEI6 // Q9DDK2 // B5XCQ9 // B5X2X6 // B9ENP4 // B5X8S5 // B5XA62 // B5XGC1 // B5X127 // C0H8F9 // B9EN47 // B5X2M8 // B5X1I3…
GO:0022626	CC	cytosolic ribosome	5	606	0.825083	21	65384	0.0321179	25.6891	1.3e-06	1.9e-05	// B5X5W5 // A7KIL2 // B5X4H4 // B5DGB6 // B5X7R3	// B5XDG0 // C0H7F3 // E0R869 // A0A1S3L5Q9 // B5DGB6 // B5DGW4 // A0A1S3S3V9 // B5X5W5 // P24558 // A7KIL2 // B5X4J9 // B5DGD4 // Q9DF27 // A0A1S3QVZ2 // C0H7L6 // A0A1S3NFD4 // B5X4H4 // A0A1S2X2U3 // A0A1S3SG61 // B5DGL6 // B5X7R3
GO:0019773	CC	proteasome core complex, alpha-subunit complex	10	606	1.65017	58	65384	0.0887067	18.6025	1.8e-10	4.9e-09	// B5X9F8 // B5X6N3 // B5XGP5 // B5XGI9 // B5DGG1 // B5XAG6 // B5XCL4 // B5DG53 // B5DGU5 // B5DGU4	// B5XDD4 // B5X9Q8 // B5XAV2 // B5X6R7 // B5X9F8 // B5XF14 // B5X5D8 // B5X750 // B9EP88 // B5X8P5 // B5XFD5 // A0A1S3KLI2 // B5XCL4 // B5XFB6 // W5S0I8 // B5XG15 // B9ELT4 // A0A1S3KLM0 // A0A1S3KLM6 // A0A1S3SQI0 // B5X8K7 // B5XC96 // A0A1S3NQV8 // B5XA59 // B5XAL3 // B5X959 // B5XA50 // A0A1S3LHY7 // B5XEP4 // A0A1S3QUR8 // B9EM89 // B5DGU6 // B5X619 // B5X768 // A0A1S3QSS0 // B5DGU3 // B5XG…
GO:0022624	CC	proteasome accessory complex	6	606	0.990099	36	65384	0.0550593	17.9824	1e-06	1.6e-05	// B9EP79 // B5X8M1 // B9EMK0 // C0H8V2 // B9EPF1 // B5DH24	// B5X8M1 // A0A1S3QZ04 // B9EPW1 // B9EQ84 // B5XE01 // B5XE06 // B9ELZ3 // B9EMK0 // C0H8V2 // B9ELT0 // B9ENH7 // B9ENB6 // B9EP79 // B9ENB1 // B5X8E2 // A0A1S3T1T4 // A0A1S3MPT7 // B5XAB2 // A0A1S3T355 // A0A1S3SAT7 // A0A1S3R8Z1 // A0A1S3NEZ9 // A0A1S3Q9A3 // A0A1S3MQ75 // B9EML6 // A0A1S3T3T5 // B9EQJ4 // A0A1S3NES1 // B5RI16 // B9EPF1 // B5X722 // B5X6E1 // A0A1S3S4T0 // B9EN67 // B5DH25 /…
GO:0033178	CC	proton-transporting two-sector ATPase complex, catalytic domain	7	606	1.15512	42	65384	0.0642359	17.9824	1.2e-07	2.8e-06	// B5DGC9 // B5X3C7 // B5DG78 // C0H9X1 // B5RI36 // B5X1Y1 // B5X195	// A0A1S3QJ64 // B5X9Q3 // A0A1S3MIY7 // A0A1S3M0W4 // A0A1S3LEN0 // B5XGB9 // B5X5F2 // B5X1Y1 // B5XCI2 // B5XB94 // B5X274 // A0A1S3PEL4 // B5DGC9 // A0A1S3SHK5 // A0A1S3QIG2 // A0A1S3L1F9 // B5XCB0 // B5X3C7 // A0A1S3QRZ4 // A0A1S3LFH4 // A0A1S3R518 // A0A1S3NHA0 // A0A1S3R6T8 // A0A1S3MJK7 // B5RI36 // A0A1S3LHR4 // B5X161 // C0H9X1 // A0A1S3MVJ3 // B5X3Z9 // A0A1S3SFI2 // A0A1S3LKI9 // A0A1…
GO:0005839	CC	proteasome core complex	16	606	2.64026	121	65384	0.185061	14.267	5.1e-14	1.7e-12	// C0H856 // B5X9F8 // B5X6N3 // B5XGP5 // B5X9D0 // B5XFH8 // B5XGI9 // B5DGG1 // B5XAG6 // B5RI58 // B5XCL4 // B5XD66 // B5DGJ1 // B5DG53 // B5DGU5 // B5DGU4	// B5XG11 // B5XAV2 // Q9DE53 // B5X750 // Q9DE54 // B5X5B1 // B5XG15 // A0A1S3KLM0 // A0A1S3KLM6 // A0A1S3NQV8 // B5XA59 // B5X916 // B5XAY5 // B5XA50 // Q9DD33 // A7KII5 // B5XGN5 // A7KII6 // B5XFW6 // A0A1S3PYN0 // B5XGG8 // B5X768 // B5XG29 // B5X8Y8 // B5X8N6 // B5DGU3 // B5DGU5 // B9EM89 // B9EML1 // B5X6T8 // B5XFE8 // B5RI58 // B5XCG8 // B9EM13 // B5XFB6 // B5XAG6 // B9EM90 // B5X619 // …
GO:0033279	CC	ribosomal subunit	14	606	2.31023	108	65384	0.165178	13.9863	2.5e-12	7.8e-11	// B5DGV7 // B5DGV2 // B5DGB6 // B5X5W5 // C0H8L1 // B5DGX5 // A7KIL2 // B5X369 // B5DGK9 // B5DGA8 // B5X4H4 // B5DGY4 // B5X7R3 // B5XEW6	// A0A1S3NNF0 // B5X5W5 // B5DGK9 // A0A1S3QQU7 // B5X9J1 // A0A1S3S2B2 // B5XC12 // B5X599 // B5X6U7 // A0A1S3L111 // A0A1S3T723 // B5X0Y8 // A0A1S3NFD4 // A0A1S3Q7X9 // C0H7K2 // B5XDA1 // B5X369 // B5X6T4 // A0A1S3SE09 // B5RIB5 // B5XBE5 // B5DGD4 // B9EP20 // B5XEW6 // Q9YGQ0 // E0R869 // B5X7M0 // B5DGV2 // B5X8X7 // A7KIL2 // A0A1S3RYR3 // M4V3H3 // B5X8A9 // C0H773 // C0H7C9 // A0A1S2X2U3…
GO:0015934	CC	large ribosomal subunit	7	606	1.15512	54	65384	0.082589	13.9863	7.4e-07	1.2e-05	// B5DGV7 // B5DGV2 // C0H8L1 // B5X5W5 // B5X369 // B5X4H4 // B5X7R3	// A0A1S3PQI7 // B5DGV7 // B5X7M0 // B5DGV2 // A0A1S3NNF0 // B5X5W5 // A0A1S3LR35 // B5RIB5 // A0A1S3QQU7 // B5XAJ8 // B5X9J1 // B5DGV1 // B5DGW6 // M4V3H3 // B5XC12 // P24558 // B5XA79 // B5X4J9 // B5X599 // B5X6U7 // A0A1S3QVZ2 // C0H7C9 // A0A1S3T723 // C0H7C7 // B5XDG0 // A0A1S3NFD4 // B5XBQ2 // B5DGW7 // C0H8H2 // B5DGW4 // C0H8L1 // B5XDA1 // B5XEA3 // B5X369 // B5X6T4 // A0A1S3N8J1 // B5XA…
GO:0015935	CC	small ribosomal subunit	7	606	1.15512	54	65384	0.082589	13.9863	7.4e-07	1.2e-05	// B5DGB6 // B5DGY4 // B5DGX5 // A7KIL2 // B5DGA8 // B5DGK9 // B5XEW6	// Q9YGQ0 // E0R869 // B5X8X7 // B5DGX5 // A7KIL2 // B5X2G7 // B5DGK9 // Q9DF27 // B5X9L6 // A0A1S3LP02 // B5DGL6 // C0H7T0 // A0A1S3RYR3 // A0A1S3QWC9 // A0A1S3S2B2 // A0A1S3RFY3 // A0A1S3LW35 // A0A1S3QU58 // B5DGA8 // B5X8A9 // B5XGL6 // C0H773 // A0A1S2X2U3 // E0R838 // A0A1S3M391 // B5DGX4 // B5X0Y8 // A0A1S3S9W5 // A0A1S3L111 // A0A1S3Q7X9 // C0H7I9 // C0H7K2 // B5DGY5 // B5DGY4 // B5DGY6 /…
GO:0045259	CC	proton-transporting ATP synthase complex	7	606	1.15512	59	65384	0.0902361	12.801	1.4e-06	2e-05	// B5DGC9 // P68529 // B5DG78 // B5RI36 // B5X6S0 // B5X5L1 // B5X195	// B5DG78 // B5XBT8 // B5X9Q3 // C0H702 // B5XGG0 // B5XDF0 // B5X4S6 // B5XGB9 // B5XF93 // B5X5F2 // M4UZU2 // B5XB94 // B9ENJ3 // A0A1S3PEL4 // B5XA73 // B5X6L8 // B5XCB0 // A0A1S3QUP6 // C0H715 // B5XAD3 // B5XAI5 // Q35920 // B5X626 // M4VHK7 // B5X9A5 // W0LQS8 // B5XB87 // B5X5E2 // A0A1S3LGZ3 // B5XCS5 // B5DGN1 // E2JDJ1 // B5DGN3 // B5DGN2 // B5RI36 // B5X9X1 // B5X6S0 // B5DGF3 // A0A1…
GO:0000502	CC	proteasome complex	26	606	4.29043	227	65384	0.34718	12.3579	3.8e-20	2.5e-18	// B5X8M1 // B5X9F8 // B5X9D0 // B5DGG1 // B5XCL4 // B5DGJ1 // B5XD66 // B9EMK0 // C0H8V2 // B5RI28 // B9EP79 // B5XFH8 // B5X6N3 // B5X386 // B5X9I8 // B5DGU9 // B5RI58 // B5DGU5 // B5DGU4 // C0H856 // B5XGP5 // B5XGI9 // B5XAG6 // B5DG53 // B9EPF1 // B5DH24	// B5XG11 // B5XAV2 // B5X9V8 // B5XDF9 // Q9DE53 // B5X449 // B5X750 // Q9DE54 // B9EQJ4 // B5XBN2 // B5X5B1 // B5XG15 // A0A1S3KLM0 // C0PUI4 // A0A1S3NNN1 // A0A1S3NQV8 // B5XC13 // B5X916 // B5XAY5 // B5XA50 // Q9DD33 // A7KII5 // B5XBM2 // A7KII6 // B5XFW6 // A0A1S3RE36 // A0A1S3PYN0 // B5XGG8 // B5X768 // A0A1S3RCJ2 // B5XG29 // B5X8Y8 // A0A1S3Q6J9 // B5X8N6 // B5X5K2 // B5DGU9 // B5DGU8 /…
GO:0000786	CC	nucleosome	8	606	1.32013	70	65384	0.10706	12.3308	3.2e-07	5.9e-06	// B9EQA0 // B5XEY5 // B9EN25 // B5X5B2 // B5XBU1 // B5X1W1 // B5X851 // P84408	// B9EMI5 // B9EPS5 // B9ELE7 // A0A1S3PEG9 // A0A1S3RN35 // A0A1S3SU11 // A0A1S3PG66 // A0A1S3L842 // B5X5B2 // A0A1S3R3V7 // A0A1S3NPG8 // B9ELA2 // B5X351 // A0A1S3RN53 // A0A1S3L6R6 // A0A1S3SU55 // P84408 // B9ENC7 // A0A1S3RAQ0 // A0A1S3L6P1 // A0A1S3PDY5 // A0A1S3SU17 // A0A1S3QYF6 // A0A1S3L6P4 // A0A1S3P5V9 // B5XDT5 // A0A1S3PDQ7 // B9EN25 // A0A1S3NNT9 // B5XBU1 // C0H823 // A0A1S3RJX0…
GO:0005885	CC	Arp2/3 protein complex	5	606	0.825083	45	65384	0.0688242	11.9883	6.3e-05	0.00084	// C0HBR6 // C0H8E0 // B5DGD5 // C0H9H2 // C0HBE5	// B5X9U3 // B5XG16 // B5X6M8 // C0HBR6 // A0A1S3S020 // A0A1S3L3P3 // A0A1S3NVZ4 // C0H8E0 // B5XE62 // B5X8R6 // B9EMV2 // B5XGW7 // A0A1S3N627 // A0A1S3QRD5 // A0A1S3MVA4 // B5XCW2 // B5XGN2 // A0A1S3L4F4 // B5X7J0 // B5XE91 // A0A1S3L3B9 // B5XGH1 // B5XBU8 // A0A1S3QAB7 // B9EMH3 // C0PUS8 // A0A1S3S073 // A0A1S3PL98 // A0A1S3T5Q8 // B9EQK6 // C0H7W0 // B5X5T6 // B5X7L8 // C0H9H2 // B9EM18 /…
GO:0005840	CC	ribosome	53	606	8.74587	621	65384	0.949774	9.20838	1.6e-32	2.5e-30	// B5DGK7 // C0H7H1 // B9EMI7 // B5DGV2 // B5DGV3 // B5X7I1 // B5XFQ0 // B5DGX5 // A7KIL2 // B5DGX3 // B5X8X3 // B5DGX1 // B5X771 // B9ELK0 // B5XDA7 // C0H7G0 // B5X5W5 // B5X5S8 // C0H8G4 // B5XG87 // C0H7M0 // B5DG02 // B5XDP1 // B5XGU1 // B5X4H4 // B5X668 // B5X748 // B5DGY4 // C0H8L1 // B5DGW8 // B5X369 // C0H8L4 // C0H779 // C0H8D1 // B5X6R2 // B5DGV7 // B5DGK9 // B5XG35 // B5DGH2 // B5DGJ6…	// B9EPU0 // B9EQB9 // C0H7J7 // A0A1S3N6S7 // B5XC98 // A0A1S3QZ96 // A0A1S3NNS5 // B5RI65 // B5XAL7 // B5X7S7 // B5XC90 // B5RI62 // C0H8C7 // B9EQ57 // B5X599 // B5X7J4 // C0H7M1 // C0H7M0 // B5DG02 // B5DG01 // B5X841 // B5X840 // C0H7M9 // A0A1S3MSB2 // B5DGL2 // B5DGL6 // A0A1S3R084 // B5DGL8 // B5X369 // B5XDP1 // A0A1S3Q485 // A0A1S3PV74 // A0A1S3RSI8 // A0A1S3LIE9 // C0H761 // B5XCV1 // …
GO:0033290	CC	eukaryotic 48S preinitiation complex	5	606	0.825083	60	65384	0.0917656	8.9912	0.00025	0.0029	// B5DGH9 // C0H9I7 // B9ENG2 // B9ENH4 // C0H9S0	// B5DGK2 // A0A1S3PT98 // A0A1S3NHJ9 // A0A1S3N267 // A0A1S3NHU9 // A0A1S3RS33 // A0A1S3QSD2 // B5X0W4 // C0H9I7 // B9ENH4 // A0A1S3NH34 // A0A1S3RRZ4 // A0A1S3NHN8 // A0A1S3R6H1 // A0A1S3N1Q3 // A0A1S3NAJ6 // B5XA72 // A0A1S3RAF8 // B9EP50 // A0A1S3PDN7 // B5XE93 // A0A1S3KS95 // A0A1S3RTM3 // B5X7Y0 // A0A1S3QL22 // A0A1S3N3K4 // B5XBY6 // B5X9A4 // A0A1S3RS31 // A0A1S3NHV3 // A0A1S3KT28 // A0…
GO:0070993	CC	translation preinitiation complex	5	606	0.825083	60	65384	0.0917656	8.9912	0.00025	0.0029	// B5DGH9 // C0H9I7 // B9ENG2 // B9ENH4 // C0H9S0	// B5DGK2 // A0A1S3PT98 // A0A1S3NHJ9 // A0A1S3N267 // A0A1S3NHU9 // A0A1S3RS33 // A0A1S3QSD2 // B5X0W4 // C0H9I7 // B9ENH4 // A0A1S3NH34 // A0A1S3RRZ4 // A0A1S3NHN8 // A0A1S3R6H1 // A0A1S3N1Q3 // A0A1S3NAJ6 // B5XA72 // A0A1S3RAF8 // B9EP50 // A0A1S3PDN7 // B5XE93 // A0A1S3KS95 // A0A1S3RTM3 // B5X7Y0 // A0A1S3QL22 // A0A1S3N3K4 // B5XBY6 // B5X9A4 // A0A1S3RS31 // A0A1S3NHV3 // A0A1S3KT28 // A0…
GO:0016282	CC	eukaryotic 43S preinitiation complex	5	606	0.825083	60	65384	0.0917656	8.9912	0.00025	0.0029	// B5DGH9 // C0H9I7 // B9ENG2 // B9ENH4 // C0H9S0	// B5DGK2 // A0A1S3PT98 // A0A1S3NHJ9 // A0A1S3N267 // A0A1S3NHU9 // A0A1S3RS33 // A0A1S3QSD2 // B5X0W4 // C0H9I7 // B9ENH4 // A0A1S3NH34 // A0A1S3RRZ4 // A0A1S3NHN8 // A0A1S3R6H1 // A0A1S3N1Q3 // A0A1S3NAJ6 // B5XA72 // A0A1S3RAF8 // B9EP50 // A0A1S3PDN7 // B5XE93 // A0A1S3KS95 // A0A1S3RTM3 // B5X7Y0 // A0A1S3QL22 // A0A1S3N3K4 // B5XBY6 // B5X9A4 // A0A1S3RS31 // A0A1S3NHV3 // A0A1S3KT28 // A0…
GO:0016469	CC	proton-transporting two-sector ATPase complex	10	606	1.65017	123	65384	0.188119	8.7719	2.9e-07	5.5e-06	// P68529 // B5DGC9 // B5X3C7 // B5DG78 // C0H9X1 // B5RI36 // B5X6S0 // B5X1Y1 // B5X5L1 // B5X195	// B5X3C7 // A0A1S3NMN9 // B5XGG0 // B5X161 // A0A1S3S5I6 // A0A1S3S5I4 // B5XDF0 // B5DGH4 // B5DGC9 // A0A1S3L1F9 // C0H715 // B5X626 // M4VHK7 // W0LQS8 // B5X6L8 // E2JDJ1 // A0A1S3MIY7 // B5XEN1 // A0A1S3LKI9 // A0A1S3MHS7 // A0A1S3RSI3 // A0A1S3PEP5 // B5DH26 // B5X195 // A0A1S3KYH8 // A0A1S3PWT1 // A0A1S3QJ64 // B5X6K1 // C0H9X1 // B5X6S0 // B5X1Y1 // B5X274 // A0A1S3RMR2 // B5XAD3 // Q359…
GO:0005852	CC	eukaryotic translation initiation factor 3 complex	5	606	0.825083	62	65384	0.0948244	8.70116	0.00029	0.0033	// B5DGH9 // C0H9I7 // B9ENG2 // B9ENH4 // C0H9S0	// B5DGK2 // A0A1S3PT98 // A0A1S3NHJ9 // A0A1S3N267 // A0A1S3NHU9 // A0A1S3RS33 // A0A1S3QSD2 // B5X0W4 // C0H9I7 // B9ENH4 // A0A1S3NH34 // A0A1S3RRZ4 // A0A1S3NHN8 // A0A1S3R6H1 // A0A1S3N1Q3 // A0A1S3NAJ6 // B5XA72 // A0A1S3RAF8 // B9EP50 // A0A1S3PDN7 // B5XE93 // A0A1S3KS95 // A0A1S3RTM3 // B5X7Y0 // A0A1S3QL22 // A0A1S3N3K4 // B5XBY6 // B5X9A4 // A0A1S3RS31 // A0A1S3NHV3 // A0A1S3KT28 // A0…
GO:0032993	CC	protein-DNA complex	8	606	1.32013	102	65384	0.156001	8.46231	5.8e-06	8.2e-05	// B9EQA0 // B5XEY5 // B9EN25 // B5X5B2 // B5XBU1 // B5X1W1 // B5X851 // P84408	// A0A1S3RN35 // B5X5B2 // A0A1S3R3V7 // B5X351 // A0A1S3PDY5 // A0A1S3R4U1 // P84408 // A0A1S3RAQ0 // A0A1S3SU36 // A0A1S3SHX4 // A0A1S3M051 // A0A1S3PDQ7 // A0A1S3SNW9 // A0A1S3R432 // A0A1S3R0U0 // B5XG24 // B9ENT8 // A0A1S3SU29 // A0A1S3MMV6 // B5X5C8 // A0A1S3LER8 // A0A1S3KUW9 // A0A1S3PJ07 // A0A1S3PFL3 // A0A1S3SHA9 // A0A1S3MX25 // B5XB04 // A0A1S3SDT8 // A0A1S3N735 // A0A1S3PG66 // A0A1…
GO:0030529	CC	ribonucleoprotein complex	65	606	10.7261	899	65384	1.37495	7.80104	5.2e-35	1.2e-32	// B5DGK7 // C0H7H1 // B9EMI7 // B5DGV2 // B5DGV3 // B5X7I1 // B5XFQ0 // B5DGX5 // A7KIL2 // B5DGX3 // B5X8X3 // B5DGX1 // B5X771 // B9ELK0 // B5XDA7 // C0H9I7 // B9ENH4 // B9EPQ0 // C0H7G0 // B5XDP1 // B5X5W5 // B5X5S8 // C0H8G4 // B5XA36 // B5XG87 // C0H7M0 // B5DG02 // B5DG42 // B5X6H9 // B5X7R3 // B5XGU1 // B5X4H4 // B5X668 // B5X748 // C0PUJ3 // B5DGY4 // C0H8L1 // B5DGW8 // B5X369 // C0H8L4…	// B9EPU0 // B9EQB9 // E0R886 // C0H7J7 // A0A1S3NX36 // A0A1S3N6S7 // B5XC90 // B5XC98 // C0HAZ6 // B5XE21 // A0A1S3NNS5 // A0A1S3R499 // B5XAL7 // B5X7S7 // A0A1S3SPI6 // B5XC93 // C0H8C7 // A0A1S3PT98 // B5XA57 // B5XA55 // B9EQ57 // B5XGF4 // B5X599 // A0A1S3P0A8 // B5X7J4 // C0H7M1 // C0H7M0 // B5DG02 // B5DG01 // B5X841 // B5X840 // C0H7M9 // B5XEV6 // A0A1S3MSB2 // B5DGL2 // B9EME3 // B5DG…
GO:0044445	CC	cytosolic part	10	606	1.65017	142	65384	0.217179	7.5982	1.1e-06	1.7e-05	// B5X2M8 // B5DGB6 // A7KIL2 // B5X5W5 // B5XA06 // B5X1B5 // B5DGQ7 // B5X4H4 // I0J1J2 // B5X7R3	// A0A1S3NBM8 // A0A1S3L4V4 // A0A1S3S419 // A0A1S3QPN8 // A0A1S3S414 // A0A1S3S412 // A0A1S3S1F2 // A0A1S3NA10 // A0A1S3R410 // B5XGF2 // A0A1S3L4F3 // A0A1S3R7V9 // B9EPE9 // C0PU61 // A0A1S3R7V5 // A0A1S3RAY6 // A0A1S3NFD4 // B5X681 // A0A1S3Q086 // A0A1S3LYU9 // B5X6T6 // B5XE30 // B5X6T9 // B5X2M8 // B5X7T9 // B5X9Z0 // B5DGD4 // A0A1S3MHB8 // A0A1S3R7W5 // B5X6E3 // A0A1S3RAZ1 // A0A1S3QR92…
GO:0000785	CC	chromatin	9	606	1.48515	172	65384	0.263061	5.64564	4e-05	0.00056	// B9EQA0 // B5XEY5 // B9EN25 // B5X5B2 // B5XBU1 // B5X1W1 // B5X601 // B5X851 // P84408	// A0A1S3SB19 // A0A1S3L1K6 // A0A1S3RN35 // A0A1S3SVU4 // A0A1S3Q8L4 // B5X5B2 // A0A1S3R3V7 // A0A1S3KLJ7 // B5X351 // A0A1S3PDY5 // A0A1S3QTF9 // P84408 // A0A1S3SDY6 // A0A1S3SDY5 // A0A1S3RL79 // A0A1S3NDR1 // A0A1S3PDQ7 // A0A1S3NDR3 // A0A1S2X086 // A0A1S3NSF9 // A0A1S3R432 // B5X3S2 // A0A1S3PW83 // A0A1S3R0U0 // B5X2S3 // A0A1S3SVV0 // A0A1S3LM37 // Q8QGP2 // B9ENT8 // A0A1S3M7V8 // A0A1…
GO:0005773	CC	vacuole	5	606	0.825083	116	65384	0.177413	4.65062	0.0048	0.042	// C0HAB4 // B5X1Y1 // C0HAD5 // B5X4D6 // B5DFV6	// O93460 // A0A1S3LTZ1 // A0A1S3QJL5 // A0A1S3S5I6 // A0A1S3S5I4 // A0A1S3QKV6 // A0A1S3KL24 // A0A1S3SJF0 // B5X0Y5 // A0A1S3NMN9 // A0A1S3PQ61 // A0A1S3M0A2 // A0A1S3ND50 // A0A1S3KRE8 // A0A1S3QBU0 // A0A1S3R6X4 // B5X3C1 // A0A1S3T6N3 // C0HAB4 // A0A1S3LV03 // A0A1S3KTP8 // A0A1S3RSI3 // A0A1S3NL02 // B5X2E6 // A0A1S3PEP5 // A0A1S3PGL1 // A0A1S3QJ64 // C0H9G6 // B5X1Y1 // A0A1S3R675 // A0A1…
GO:0031982	CC	vesicle	21	606	3.46535	524	65384	0.801419	4.32401	5e-08	1.2e-06	// B5X397 // B5DGE8 // B9EMH1 // C0HAC4 // B5X2M8 // B5X361 // B5X9F8 // S5RRC8 // C0HAL2 // C0HAE8 // B9EMS3 // C0HAI2 // B5X3S5 // B5DGD5 // B5DH02 // B5X3Q1 // B9EQ28 // B9ENP4 // B5X186 // B5X127 // B5X3T4	// O93460 // A0A1S3RD27 // A0A1S3PEC8 // A0A1S3RNG4 // A0A1S3RG86 // B8YQA0 // A0A1S3KMG3 // A0A1S3QC32 // A0A1S3RT65 // B5X7S6 // B5X127 // A0A1S3SZW0 // A0A1S3MNF6 // A0A1S3LZL1 // A0A1S3NSF3 // A0A1S3NSF1 // B5X361 // B5X5K5 // A0A1S3N9U2 // A0A1S3SWV3 // B5X208 // A0A1S3NEW7 // A0A1S3M9M5 // A0A1S3QKQ9 // A0A1S3REP0 // A0A1S3RGX4 // A0A1S3Q1K1 // A0A1S3M8G6 // A0A1S3Q4E7 // A0A1S3RLW5 // A0A1…
GO:0031988	CC	membrane-bounded vesicle	20	606	3.30033	508	65384	0.776948	4.24781	1.3e-07	2.9e-06	// B5X397 // B5DGE8 // B9EMH1 // C0HAC4 // B5X2M8 // B5X361 // B5X9F8 // C0HAI2 // C0HAL2 // C0HAE8 // B9EMS3 // B5X3S5 // B5DGD5 // B5DH02 // B5X3Q1 // B9EQ28 // B9ENP4 // B5X186 // B5X127 // B5X3T4	// O93460 // A0A1S3RD27 // A0A1S3PEC8 // A0A1S3RNG4 // A0A1S3RG86 // B8YQA0 // A0A1S3KMG3 // A0A1S3RT65 // B5X7S6 // B5X127 // A0A1S3SZW0 // A0A1S3MNF6 // A0A1S3LZL1 // A0A1S3NSF3 // A0A1S3NSF1 // B5X361 // B5X5K5 // A0A1S3N9U2 // A0A1S3SWV3 // B5X208 // A0A1S3NEW7 // A0A1S3M9M5 // A0A1S3QKQ9 // A0A1S3REP0 // A0A1S3RGX4 // A0A1S3Q1K1 // A0A1S3M8G6 // A0A1S3Q4E7 // A0A1S3RLW5 // A0A1S3NST1 // A0A1…
GO:0005829	CC	cytosol	12	606	1.9802	335	65384	0.512358	3.86487	9.5e-05	0.0012	// B5XET7 // B5X2M8 // B5DGB6 // A7KIL2 // C0H9L8 // B5X5W5 // B5XA06 // B5X1B5 // B5DGQ7 // B5X4H4 // I0J1J2 // B5X7R3	// B5X9U7 // B5X5E4 // A0A1S3NBM8 // A0A1S3L4V4 // B5XDG0 // B5XAK7 // A0A1S3S419 // A0A1S3KNQ1 // A0A1S3S414 // A0A1S3S412 // A0A1S3MDM2 // A0A1S3RTX7 // A0A1S3RTX6 // A0A1S3ST11 // A0A1S3KR66 // A0A1S3NA10 // A0A1S3T062 // A0A1S3T039 // C0H744 // A0A1S3KPH9 // A0A1S3KNI3 // A0A1S3S5Q1 // A0A1S3S5Q6 // C0PU61 // A0A1S3MDE2 // A0A1S3R410 // A0A1S3KYC4 // B5XGF2 // A0A1S3R145 // A0A1S3KPH4 // A0A1…
GO:0005737	CC	cytoplasm	195	606	32.1782	6443	65384	9.85409	3.26547	1.7e-38	8.2e-36	// B5DGK7 // C0PUP3 // B5X3R3 // B5XFQ0 // B5DGK9 // B5X3C0 // B5XE27 // B9ELK0 // Q78BU2 // C0HAA0 // B5X592 // B5X4W6 // C0HAI2 // C0H9E1 // B5XA56 // B5XGF6 // B5DG05 // B5DG02 // C0HAE8 // B5X186 // C0H9S0 // B5XGU1 // B5X361 // B5X369 // B5X767 // B5XDP1 // C0HAB0 // B5DGU5 // B5DGU4 // C0H8D1 // C0PU77 // B5XFE9 // B5RI58 // B5XCD1 // B5X2M8 // B5X1P3 // B9ENG2 // B5X2M3 // B5X0X6 // C0HBA2…	// A0A1S3QDX6 // A0A1S3QL56 // A0A1S3L4V4 // A0A1S3PLW1 // A0A1S3S8M4 // A0A1S3S8M2 // A0A1S3KXH0 // C0H773 // A0A1S3LVB0 // C0H9S0 // A0A1S3LVB5 // A0A1S3S3L0 // A0A1S3LM30 // A0A1S3QNW3 // B5X8F3 // B5X208 // B5X207 // A0A1S3RDG3 // B5X8F8 // A0A1S3PTI0 // A0A1S3RSI8 // A0A1S3RSI3 // A0A1S3RSI2 // A0A1S3M8G6 // A0A1S3LWZ2 // A0A1S3R395 // A0A1S3S9A8 // A0A1S3S9A9 // A0A1S3S9A6 // A0A1S3S9A7 // …
GO:0005874	CC	microtubule	15	606	2.47525	514	65384	0.786125	3.14867	0.00014	0.0017	// B5XFE9 // B5DH01 // B5XG89 // A7KJD9 // B5X592 // B5DGE8 // C0H808 // Q2ERI0 // C0PU76 // B5DH02 // B9EMD3 // C0HBL4 // B5X0U5 // B5X3H7 // B9EN30	// A0A1S3NL57 // A0A1S3P0J6 // O93460 // A0A1S3STF6 // A0A1S3R5W2 // A0A1S3Q6H7 // A0A1S3PLW1 // A0A1S3R717 // A0A1S3PD57 // B5X592 // A0A1S3QAD9 // A0A1S3Q505 // A0A1S3Q9E4 // A0A1S3R6V2 // A0A1S3LVB5 // A0A1S3LXS2 // A0A1S3M0R3 // A0A1S3LXS6 // A0A1S3KW65 // A0A1S3LWS9 // A0A1S3Q9K8 // A0A1S3NZ90 // A0A1S3PTI0 // B5XFE9 // A0A1S3NZH7 // A0A1S3NZH6 // A0A1S3NZH3 // A0A1S3LIE8 // A0A1S3QHY9 // A0…
GO:0043232	CC	intracellular non-membrane-bounded organelle	107	606	17.6568	3693	65384	5.64817	3.1261	7.2e-22	5.7e-20	// B5DGK7 // B5X3R3 // B5X5W5 // B5DGK9 // B9ELK0 // B5X5B2 // Q78BU2 // P84408 // B5X592 // C0H9E1 // C0H7M0 // B5DG02 // B5XGU1 // B5DGL1 // B5XFE9 // B9EQA0 // B5X369 // C0H779 // B5XG35 // B9ELH2 // C0HB84 // B5RI77 // C0PU76 // B5DGD5 // B5XEW6 // C0H7H1 // B5DGV7 // B5DGV2 // B5DGV3 // A7KIL2 // B5X8X3 // B5X2M3 // B5DGE8 // B5X5S8 // B5XDA7 // B9EMD3 // B5XBU1 // B5XDP1 // B5X601 // C0H944…	// B9EPU0 // A0A1S3P0J6 // A0A1S3P0J5 // A0A1S3KK75 // A0A1S3SVU4 // A0A1S3RU04 // A0A1S3SPI8 // A0A1S3PLW1 // Q78BU2 // B5XC30 // A0A1S3R717 // A0A1S3SPI6 // A0A1S3R715 // A0A1S3SPI4 // A0A1S3RQS8 // A0A1S3MQR9 // B5X592 // A0A1S3KXH2 // A0A1S3PYC1 // B9EQ57 // B5X599 // A0A1S3SBN8 // A0A1S3N3P3 // B5X841 // B5X840 // A0A1S3LVB5 // A0A1S3MSB2 // A0A1S3PRU8 // A0A1S3P7T7 // A0A1S3M0R3 // A0A1S3PY…
GO:0043228	CC	non-membrane-bounded organelle	107	606	17.6568	3693	65384	5.64817	3.1261	7.2e-22	5.7e-20	// B5DGK7 // B5X3R3 // B5X5W5 // B5DGK9 // B9ELK0 // B5X5B2 // Q78BU2 // P84408 // B5X592 // C0H9E1 // C0H7M0 // B5DG02 // B5XGU1 // B5DGL1 // B5XFE9 // B9EQA0 // B5X369 // C0H779 // B5XG35 // B9ELH2 // C0HB84 // B5RI77 // C0PU76 // B5DGD5 // B5XEW6 // C0H7H1 // B5DGV7 // B5DGV2 // B5DGV3 // A7KIL2 // B5X8X3 // B5X2M3 // B5DGE8 // B5X5S8 // B5XDA7 // B9EMD3 // B5XBU1 // B5XDP1 // B5X601 // C0H944…	// B9EPU0 // A0A1S3P0J6 // A0A1S3P0J5 // A0A1S3KK75 // A0A1S3SVU4 // A0A1S3RU04 // A0A1S3SPI8 // A0A1S3PLW1 // Q78BU2 // B5XC30 // A0A1S3R717 // A0A1S3SPI6 // A0A1S3R715 // A0A1S3SPI4 // A0A1S3RQS8 // A0A1S3MQR9 // B5X592 // A0A1S3KXH2 // A0A1S3PYC1 // B9EQ57 // B5X599 // A0A1S3SBN8 // A0A1S3N3P3 // B5X841 // B5X840 // A0A1S3LVB5 // A0A1S3MSB2 // A0A1S3PRU8 // A0A1S3P7T7 // A0A1S3M0R3 // A0A1S3PY…
GO:0044427	CC	chromosomal part	10	606	1.65017	382	65384	0.584241	2.82446	0.0036	0.036	// B5X105 // B9EQA0 // B5XEY5 // B9EN25 // B5X1W1 // B5XBU1 // B5X5B2 // B5X601 // B5X851 // P84408	// B9EPK8 // A0A1S3SVU4 // A0A1S3S656 // A0A1S3MGC1 // A0A1S3MNB7 // A0A1S3NNY5 // A0A1S3SU36 // A0A1S3KXH2 // A0A1S3SHX4 // A0A1S3Q977 // A0A1S3NDR1 // A0A1S3PDQ7 // A0A1S3NDR3 // A0A1S3NSF9 // B5X2S3 // A0A1S3LM37 // A0A1S3N1V0 // A0A1S3RN22 // A0A1S3RQE4 // A0A1S3LER8 // B5X5R0 // A0A1S3PFL3 // A0A1S3SHA9 // A0A1S3MVD8 // A0A1S3MX25 // A0A1S3MMV6 // A0A1S3T0Y4 // A0A1S3PAI0 // A0A1S3RN53 // C0…
GO:0005743	CC	mitochondrial inner membrane	10	606	1.65017	396	65384	0.605653	2.72461	0.0046	0.041	// C0HBS0 // P68529 // B5X767 // B5X6S0 // B5X0X6 // B5XAF2 // B5X1N7 // B5X5L1 // B5RI88 // B5X2X8	// O93460 // C0H7J2 // A0A1S3RR63 // A0A1S3RTX1 // B5X7S2 // C0H8C6 // Q94NY5 // A0A1S5RRP6 // A0A1S5RRP5 // Q94NY1 // B5XEV9 // S6D369 // Q549J0 // B5X184 // A0A1S3PEJ9 // M4VHK7 // A0A1S3R082 // A0A1S3LGZ3 // U5Y4W0 // B5X0X6 // A0A0F6NW24 // B5XDQ0 // B5DH26 // A0A1S3KY97 // B5X6K4 // A0A1S3R1I2 // B5X6D4 // A0A0F6NVY0 // B5XCH2 // B5RI87 // B5XAD3 // B5XFL8 // B5XFL4 // B5RI88 // C0HBS0 // A0…
GO:0044444	CC	cytoplasmic part	115	606	18.9769	4582	65384	7.00783	2.70796	1e-18	6.1e-17	// B5DGK7 // C0PUP3 // B5X369 // B5XFQ0 // B5DGH9 // B5DGK9 // B9ELK0 // B5DG05 // B5DG02 // B5X186 // B5X2X8 // B5XGU1 // B5X361 // B5XDA7 // B5X767 // B5XDP1 // C0HAB0 // C0HAB4 // C0PU77 // B5X2M8 // B9ENG2 // B5X2M3 // B5X0X6 // C0HBA2 // B5X3T4 // B5XEW6 // C0H7H1 // B5X371 // C0HAC4 // B5DGV2 // B5DGV3 // A7KIL2 // B5X8X3 // B5X8P4 // B5X6S0 // B5X1Y1 // B5XET7 // B5X5S8 // B5XA36 // C0H779…	// B9EPU0 // A0A1S3L4V4 // B5X117 // A0A1S3QYD5 // B9EPU7 // B5DGJ3 // A0A1S3KK75 // B5X449 // A0A1S3QMW9 // A0A1S3T3E6 // A0A1S3N4I6 // A0A1S3SPI9 // A0A1S3SPI8 // A0A1S3PLW1 // B9EMQ1 // A0A1S3S5T4 // A0A1S3S2A6 // B5RI65 // B5RI66 // A0A1S3Q5Y7 // A0A1S3SPI6 // B5X9J4 // A0A1S3SPI4 // A0A1S3NTE2 // A0A1S3KXH0 // B5X591 // A0A1S3KJP9 // A0A1S3SF11 // A0A1S3KJP7 // A0A1S3SF13 // B9EQ57 // C0H773…
GO:0032991	CC	macromolecular complex	167	606	27.5578	6765	65384	10.3466	2.66347	1.1e-24	1.3e-22	// B5DGK7 // C0PUP3 // B5X3R3 // B5X3C7 // B5XFQ0 // B5DGK9 // B9ELK0 // B5X5B2 // P84408 // B5XGP5 // B9EPQ0 // B5X592 // B5DGC9 // B5X4W9 // B5DH24 // B5XA53 // B5DG05 // B5DG02 // B5X3S5 // B5XGU1 // B5X361 // C0PUJ3 // B9EQA0 // B5X369 // B5X767 // B5DGU9 // B5XDP1 // B5DGU5 // B5DGU4 // C0PU77 // C0PU76 // B5RI58 // B5X2M8 // B9ENG2 // B5X3T4 // B5X2M3 // B5XAG6 // B5XEN0 // B5X195 // B5XEW6…	// A0A1S3QDX6 // A0A1S3PLW1 // A0A1S3PLW3 // A0A1S3S8M1 // A0A1S3KXH5 // C0HBF6 // A0A1S3L0F4 // A0A1S3RKC7 // A0A1S3N7P1 // A0A1S3LVB0 // A0A1S3LQ97 // A0A1S3LVB6 // A0A1S3PRU8 // A0A1S3S3L4 // A0A1S3QNW5 // A0A1S3LM30 // C0H9F5 // A0A1S3PGH0 // A0A1S3RDG0 // A0A1S3PTI0 // B5XGH1 // A0A1S3RSI8 // A0A1S3RSI5 // A0A1S3RSI3 // A0A1S3LWZ2 // A0A1S3T5G5 // A0A1S3S378 // A0A1S3PZ33 // A0A1S3PZ34 // A0…
GO:0005740	CC	mitochondrial envelope	13	606	2.14521	594	65384	0.908479	2.36133	0.0045	0.041	// C0HBS0 // P68529 // B5XAF2 // B5X767 // B5X6S0 // B5X0X6 // B5XCA1 // B5XED1 // B5XEX1 // B5X1N7 // B5X5L1 // B5RI88 // B5X2X8	// O93460 // C0H7J2 // A0A1S3RR63 // A0A1S3RTX1 // B5X7S2 // A0A1S3PZF2 // C0H8C6 // Q94NY5 // A0A1S5RRP6 // A0A1S5RRP5 // Q94NY1 // B5DG07 // B5XEV9 // S6D369 // Q549J0 // B5X184 // A0A1S3M0M0 // A0A1S3PEJ9 // M4VHK7 // A0A1S3R082 // A0A1S3LGZ3 // B5X5K6 // A0A1S3QAX9 // A0A1S3PT93 // A0A1S3L4Q1 // B5X7V2 // A0A1S3PEX5 // A0A1S3REP5 // U5Y4W0 // A0A1S3QRG5 // C0H7S2 // B5X0X6 // A0A0F6NW24 // A0…
GO:0044429	CC	mitochondrial part	15	606	2.47525	691	65384	1.05683	2.34214	0.0026	0.028	// C0PU77 // C0HBS0 // P68529 // B5XAF2 // B5X767 // B5X6S0 // B5X0X6 // B5XCA1 // B5XED1 // B5XEX1 // B5X1N7 // B5XAB6 // B5X5L1 // B5RI88 // B5X2X8	// O93460 // A0A1S3RM23 // C0H7J2 // A0A1S3P1P4 // A0A1S3RR63 // B5X3F1 // A0A1S3P9I9 // B5XEF9 // A0A1S3RTX1 // B5X7S2 // A0A1S3PZF2 // C0H8C6 // Q94NY5 // A0A1S5RRP6 // A0A1S5RRP5 // Q94NY1 // B5DG07 // B5XEV9 // S6D369 // Q549J0 // A0A1S3RNL9 // A0A1S3M0M0 // A0A1S3PEJ9 // M4VHK7 // A0A1S3R082 // A0A1S3LGZ3 // B5X5K6 // A0A1S3LI09 // A0A1S3PT93 // A0A1S3L4Q1 // B5X982 // C0PU77 // A0A1S3PEX5 /…
GO:0031975	CC	envelope	15	606	2.47525	720	65384	1.10119	2.2478	0.0038	0.037	// C0HBS0 // B5X4X1 // P68529 // B5XAF2 // B5X767 // B5X6S0 // B5X0X6 // B5XCA1 // B5XED1 // B5XEX1 // B5X1N7 // B5X120 // B5X5L1 // B5RI88 // B5X2X8	// O93460 // C0H7J2 // A0A1S3MDV3 // A0A1S3RR63 // A0A1S3RU05 // A0A1S3RTX1 // B5X7S2 // A0A1S3PZF2 // C0H8C6 // Q94NY5 // A0A1S5RRP6 // A0A1S5RRP5 // Q94NY1 // B5DG07 // B5XEV9 // A0A1S3KVL2 // S6D369 // Q549J0 // B5X184 // A0A1S3M0M0 // A0A1S3PEJ9 // A0A1S3QQ11 // A0A1S3R082 // A0A1S3QBC0 // A0A1S3LGZ3 // B5X5K6 // A0A1S3QAX9 // A0A1S3N1V3 // A0A1S3SZ06 // A0A1S3L4Q1 // A0A1S3QB00 // B5X982 // …
GO:0031967	CC	organelle envelope	15	606	2.47525	720	65384	1.10119	2.2478	0.0038	0.037	// C0HBS0 // B5X4X1 // P68529 // B5XAF2 // B5X767 // B5X6S0 // B5X0X6 // B5XCA1 // B5XED1 // B5XEX1 // B5X1N7 // B5X120 // B5X5L1 // B5RI88 // B5X2X8	// O93460 // C0H7J2 // A0A1S3MDV3 // A0A1S3RR63 // A0A1S3RU05 // A0A1S3RTX1 // B5X7S2 // A0A1S3PZF2 // C0H8C6 // Q94NY5 // A0A1S5RRP6 // A0A1S5RRP5 // Q94NY1 // B5DG07 // B5XEV9 // A0A1S3KVL2 // S6D369 // Q549J0 // B5X184 // A0A1S3M0M0 // A0A1S3PEJ9 // A0A1S3QQ11 // A0A1S3R082 // A0A1S3QBC0 // A0A1S3LGZ3 // B5X5K6 // A0A1S3QAX9 // A0A1S3N1V3 // A0A1S3SZ06 // A0A1S3L4Q1 // A0A1S3QB00 // B5X982 // …
GO:0044421	CC	extracellular region part	21	606	3.46535	1072	65384	1.63954	2.1136	0.0016	0.017	// B5X397 // B5DGE8 // B9EMH1 // C0PUP9 // B5X2M8 // B5X1Q5 // B5X9F8 // C0HAI2 // C0HAL2 // B5DGD5 // B9EMS3 // B5X1Q8 // Q6IWH5 // A7KE05 // B5X4D6 // B5X3Q1 // B9ENP4 // B5X4T6 // B5X851 // B5X127 // B5DH02	// A0A1S3M7P7 // A0A1S3KJY5 // A0A1S3NJ41 // A0A1S3KPH8 // A0A1S3LUR3 // A0A1S3MPB3 // A0A1S3KYT1 // A0A1S3QG25 // A0A1S3N6S1 // A0A1S3P472 // B5XAV9 // A0A1S3R490 // A0A1S3LVG3 // B5XE24 // A0A1S3NA11 // A0A1S3R5W6 // A0A1S3MJW4 // A0A1S3R2F7 // A0A1S3S6C7 // A0A1S3MFV0 // B5X7S6 // A0A1S3T2H2 // B5X1J1 // A0A1S3PL38 // A0A1S3MZY6 // A0A1S3R4F1 // A0A1S3NZJ5 // A0A1S3R4F2 // A0A1S3PRG9 // A0A1S3…
GO:0005739	CC	mitochondrion	19	606	3.13531	1012	65384	1.54778	2.02569	0.0039	0.037	// C0PU77 // C0HBS0 // B5X6Y7 // B9ENB2 // B5XEX1 // P68529 // B5XAF2 // B9EMN2 // B5X767 // B5X6S0 // B5X0X6 // C0HBA2 // B5XED1 // B5X1N7 // B5XCA1 // B5XAB6 // B5X5L1 // B5RI88 // B5X2X8	// O93460 // A0A1S3RM23 // C0H7J2 // A0A1S3L754 // A0A1S3RQ95 // A0A1S3RR63 // B5X4Q7 // B5X3F1 // A0A1S3P9I9 // B5XEF9 // A0A1S3RTX1 // B5X7S2 // A0A1S3R5W9 // B5X9J7 // B5X9J4 // A0A1S3PZF2 // C0H8C6 // A0A1S3NTE2 // B5X591 // A0A1S3PGR8 // A0A1S5RRP6 // A0A1S5RRP5 // B9EQ57 // Q94NY1 // B5DG07 // B5XEV9 // A0A1S3P5L4 // S6D369 // Q549J0 // A0A1S3RNL9 // A0A1S3M0M0 // A0A1S3PEJ9 // A0A172JU65 /…
GO:0044430	CC	cytoskeletal part	29	606	4.78548	1656	65384	2.53273	1.88945	0.0014	0.015	// A7KJD9 // C0HBR6 // C0H8E0 // C0HBL4 // B5X0U5 // B5DGD5 // B5DGE8 // B5X592 // B5X3R3 // B9EMD3 // B9EN30 // C0H808 // B5X3H7 // C0PU76 // B5X320 // C0H9F5 // B5X4G3 // C0H9H2 // C0H8S8 // B5XFE9 // B5XG89 // Q2ERI0 // B5X2M3 // B5DH01 // B5X3R2 // B5DH02 // C0HBE5 // C0PU50 // B5DG56	// A0A1S3P0J6 // A0A1S3KSA5 // A0A1S3SPI9 // A0A1S3SPI8 // A0A1S3PLW1 // A0A1S3R717 // A0A1S3PD57 // A0A1S3SPI4 // A0A1S3MQR9 // B5X592 // A0A1S3QAD9 // A0A1S3SBN8 // A0A1S3N3P3 // A0A1S3LVB0 // A0A1S3LVB5 // A0A1S3PRU8 // A0A1S3M0R3 // C0PU83 // A0A1S3QF13 // C0H9F5 // A0A1S3PBL4 // A0A1S3N3F7 // A0A1S3N3F2 // A0A1S3PTI0 // B5XGH1 // A0A1S3LV05 // A0A1S3QRG0 // A0A1S3S7S7 // A0A1S3MX28 // A0A1S3…
GO:0044424	CC	intracellular part	272	606	44.8845	15712	65384	24.0303	1.86783	1.2e-16	5.5e-15	// B5DGK7 // C0PUP3 // B5DG56 // A9Y0C7 // B5X3R3 // B5XFQ0 // B5XBZ7 // B5DGK9 // B5X3C0 // B5XE27 // B9ELK0 // B5X5B2 // Q78BU2 // C0HAA0 // P84408 // B5XA06 // B9EPQ0 // B5X592 // B5DGC9 // C0HAI2 // C0H9E1 // B5X4W9 // B5X911 // B5XDP1 // B5XA53 // B5XGF6 // B5DG05 // B5DG02 // C0HAE8 // B5X186 // C0H9S0 // B5XGU1 // B9EN30 // B5DGL1 // B5X361 // C0PUJ3 // B9EQA0 // B5X369 // B5X767 // B5DGU9…	// A0A1S3QDX6 // A0A1S3M645 // A0A1S3QL53 // A0A1S3QL56 // A0A1S3L4V4 // A0A1S3PLW1 // A0A1S3S8M4 // A0A1S3S8M2 // A0A1S3KXH5 // A0A1S3RQS8 // A0A1S3KXH0 // C0HBF6 // A0A1S3KXH2 // A0A1S3L0F4 // A0A1S3MQR0 // A0A1S3RIG2 // A0A1S3QY19 // A0A1S3SKN5 // A0A1S3MF27 // A0A1S3KRM2 // A0A1S3LVB0 // A0A1S3LQ91 // B5X8U5 // A0A1S3LQ97 // A0A1S3MF29 // A0A1S3PRU8 // A0A1S3S3L0 // A0A1S3QNW5 // A0A1S3LM37 /…
GO:0005622	CC	intracellular	272	606	44.8845	15713	65384	24.0319	1.86771	1.2e-16	5.5e-15	// B5DGK7 // C0PUP3 // B5DG56 // A9Y0C7 // B5X3R3 // B5XFQ0 // B5XBZ7 // B5DGK9 // B5X3C0 // B5XE27 // B9ELK0 // B5X5B2 // Q78BU2 // C0HAA0 // P84408 // B5XA06 // B9EPQ0 // B5X592 // B5DGC9 // C0HAI2 // C0H9E1 // B5X4W9 // B5X911 // B5XDP1 // B5XA53 // B5XGF6 // B5DG05 // B5DG02 // C0HAE8 // B5X186 // C0H9S0 // B5XGU1 // B9EN30 // B5DGL1 // B5X361 // C0PUJ3 // B9EQA0 // B5X369 // B5X767 // B5DGU9…	// A0A1S3QDX6 // A0A1S3M645 // A0A1S3QL53 // A0A1S3QL56 // A0A1S3L4V4 // A0A1S3PLW1 // A0A1S3S8M4 // A0A1S3S8M2 // A0A1S3KXH5 // A0A1S3RQS8 // A0A1S3KXH0 // C0HBF6 // A0A1S3KXH2 // A0A1S3L0F4 // A0A1S3MQR0 // A0A1S3RIG2 // A0A1S3QY19 // A0A1S3SKN5 // A0A1S3MF27 // A0A1S3KRM2 // A0A1S3LVB0 // A0A1S3LQ91 // B5X8U5 // A0A1S3LQ97 // A0A1S3MF29 // A0A1S3PRU8 // A0A1S3S3L0 // A0A1S3QNW5 // A0A1S3LM37 /…
GO:0044446	CC	intracellular organelle part	95	606	15.6766	5582	65384	8.53726	1.83625	1.7e-07	3.4e-06	// B5DGK9 // B5X5B2 // P84408 // B5X592 // B5X4W9 // B5XAF2 // B5X186 // B5X361 // B5XFE9 // B9EQA0 // B5X369 // B5X767 // C0H9F5 // C0HAB0 // C0PU77 // C0PU76 // B5XEN0 // B5DGD5 // B5X0X6 // C0H944 // B5X3T4 // B5XEW6 // C0HBS0 // B5DGV7 // B5DGV2 // A7KIL2 // B5X6S0 // B5X1Y1 // B5X2M3 // B5DGE8 // B5XET7 // B9EMD3 // B5XBU1 // B5X601 // B5RI88 // B5X4X1 // B5X6J8 // B5XED1 // C0HAD5 // B5DFY2…	// A0A1S3QDX6 // A0A1S3PLW1 // A0A1S3S8M2 // A0A1S3KXH5 // A0A1S3MQR9 // C0HBF6 // A0A1S3KXH2 // A0A1S3RKC7 // A0A1S3LVB0 // A0A1S3LQ97 // A0A1S3LVB6 // A0A1S3PRU8 // A0A1S3QNW5 // A0A1S3LM37 // A0A1S3LM30 // A0A1S3QNW3 // C0H9F5 // B5X208 // B5X207 // A0A1S3RDG0 // A0A1S3PTI0 // B5XGH1 // A0A1S3RSI5 // A0A1S3RSI3 // A0A1S3LWZ2 // A0A1S3Q7H1 // A0A1S3T5G5 // B5X6J8 // A0A1S3S378 // A0A1S3PZ33 // …
GO:0043234	CC	protein complex	99	606	16.3366	5843	65384	8.93644	1.82809	1.2e-07	2.8e-06	// C0PUP3 // B5X3C7 // B5X592 // B5DGC9 // B5X4W9 // B5XA53 // B5DG05 // B5X3S5 // B5X361 // B5XFE9 // B5X767 // B5DGU9 // C0H9F5 // B5DGU5 // B5DGU4 // C0PU77 // C0PU76 // B5XEN0 // B5X2M8 // B9ENG2 // B5DGD5 // B5XAG6 // B9EPF1 // B5X3T4 // B5DH24 // C0H9X4 // C0H9X1 // B5X8P4 // B5X6S0 // B5X1Y1 // B5X2M3 // B5DGE8 // P68529 // B9EMD3 // B5DGJ1 // B5X601 // B5X4X1 // B5X386 // B5X9I8 // B5X195…	// A0A1S3QDX6 // A0A1S3PLW1 // A0A1S3PLW3 // A0A1S3S8M1 // A0A1S3KXH5 // C0HBF6 // A0A1S3L0F4 // A0A1S3N7P1 // A0A1S3LVB0 // A0A1S3LQ97 // A0A1S3LVB6 // A0A1S3PRU8 // A0A1S3S3L4 // A0A1S3QNW5 // A0A1S3LM30 // C0H9F5 // A0A1S3PGH0 // A0A1S3RDG0 // A0A1S3PTI0 // B5XGH1 // A0A1S3RSI5 // A0A1S3RSI3 // A0A1S3LWZ2 // A0A1S3T5G5 // A0A1S3S378 // A0A1S3PZ33 // A0A1S3PZ34 // A0A1S3L9T8 // A0A1S3MEA6 // A0…
GO:0044422	CC	organelle part	95	606	15.6766	5624	65384	8.60149	1.82254	2.3e-07	4.5e-06	// B5DGK9 // B5X5B2 // P84408 // B5X592 // B5X4W9 // B5XAF2 // B5X186 // B5X361 // B5XFE9 // B9EQA0 // B5X369 // B5X767 // C0H9F5 // C0HAB0 // C0PU77 // C0PU76 // B5XEN0 // B5DGD5 // B5X0X6 // C0H944 // B5X3T4 // B5XEW6 // C0HBS0 // B5DGV7 // B5DGV2 // A7KIL2 // B5X6S0 // B5X1Y1 // B5X2M3 // B5DGE8 // B5XET7 // B9EMD3 // B5XBU1 // B5X601 // B5RI88 // B5X4X1 // B5X6J8 // B5XED1 // C0HAD5 // B5DFY2…	// A0A1S3QDX6 // A0A1S3PLW1 // A0A1S3S8M2 // A0A1S3KXH5 // A0A1S3MQR9 // C0HBF6 // A0A1S3KXH2 // A0A1S3L0F4 // A0A1S3RKC7 // A0A1S3LVB0 // A0A1S3LQ97 // A0A1S3LVB6 // A0A1S3PRU8 // A0A1S3QNW5 // A0A1S3LM37 // A0A1S3LM30 // A0A1S3QNW3 // C0H9F5 // B5X208 // B5X207 // A0A1S3RDG0 // A0A1S3PTI0 // B5XGH1 // A0A1S3RSI5 // A0A1S3RSI3 // A0A1S3LWZ2 // A0A1S3Q7H1 // A0A1S3T5G5 // B5X6J8 // A0A1S3S378 // …
GO:0005856	CC	cytoskeleton	41	606	6.76568	2481	65384	3.79451	1.78302	0.00055	0.0062	// A7KJD9 // C0HBR6 // B5XFZ3 // C0H8E0 // C0HBL4 // B5X0U5 // Q78BU2 // B5DGD5 // B5X331 // O42161 // B5DGE8 // B5XB79 // B5X592 // C0H9E1 // C0H9H2 // B5X3R3 // B9EMD3 // B9EN30 // C0H808 // B5X3H7 // B5DG40 // B5DGL1 // C0PU76 // B5X320 // C0H9F5 // B5X4G3 // B5XAM0 // B9ELH2 // C0HB84 // B5RI77 // C0H8S8 // B5XFE9 // B5XG89 // Q2ERI0 // B5X2M3 // B5DH01 // B5X3R2 // B5DH02 // C0HBE5 // C0PU50…	// A0A1S3P0J6 // A0A1S3P0J5 // A0A1S3RU04 // A0A1S3SPI8 // A0A1S3PLW1 // Q78BU2 // A0A1S3LTU1 // A0A1S3R717 // A0A1S3PD57 // A0A1S3R715 // A0A1S3SPI4 // A0A1S3RQS8 // A0A1S3MQR9 // B5X592 // A0A1S3QAD9 // A0A1S3SBN8 // A0A1S3N3P3 // A0A1S3LVB0 // A0A1S3LVB5 // A0A1S3PRU8 // A0A1S3P7T7 // A0A1S3M0R3 // A0A1S3PY28 // C0PU83 // A0A1S3QF13 // C0H9F5 // A0A1S3PBL4 // C0H9F0 // A0A1S3N3F7 // A0A1S3N3F2…
GO:0031090	CC	organelle membrane	26	606	4.29043	1576	65384	2.41038	1.77998	0.0049	0.042	// B5X4X1 // P68529 // B5X6S0 // B5X1Y1 // B5X0U9 // Q4FZ63 // B5XAF2 // B5X1N7 // B5X3S5 // B5XCD1 // B5RI88 // B5XED1 // C0HBS0 // B5X361 // C0HAD5 // B5X767 // C0HAB0 // B5X120 // B5X186 // B5X2X8 // C0HB49 // B5DG77 // B5X0X6 // B9EQ28 // B5X5L1 // B5X3T4	// B9EPU7 // A0A1S3S8M2 // B5X595 // A0A1S3KJP9 // A0A1S3SF11 // A0A1S3SF13 // A0A1S3PPW8 // A0A1S3R082 // A0A1S3LM30 // A0A1S3QNW3 // A0A1S3N1V3 // B5X208 // A0A1S3PPY4 // A0A1S3M106 // A0A1S3SJU3 // A0A1S3RSI3 // A0A1S3SQU3 // A0A1S3RFL5 // B5DGE5 // I6NYB8 // B5RI87 // B5XFL8 // B5XFL4 // B5RI88 // A0A1S3L6J3 // A0A1S3L6J6 // A0A1S3L706 // A0A1S3S282 // A0A1S3KK93 // A0A1S3MEW8 // A0A1S3P1H0 /…
GO:0043226	CC	organelle	218	606	35.9736	13626	65384	20.84	1.72618	2e-11	5.8e-10	// B5DGK7 // A9Y0C7 // B5X3R3 // B5XFQ0 // B5DGK9 // B9ELH2 // B9ELK0 // B5X5B2 // Q78BU2 // P84408 // B5X592 // C0HAI2 // C0H9E1 // B5X4W9 // B5X911 // C0H7M0 // B5DG02 // C0HAE8 // B5X186 // B5XGU1 // B5X397 // B9EN30 // B5DGL1 // B5X361 // B5XFE9 // B9EQA0 // B5X369 // B5X767 // B5XDP1 // C0HAB0 // C0HB84 // C0PU50 // B5RI77 // B5DGU4 // B5X4A5 // C0PU77 // C0PU76 // B5RI58 // B5X3S5 // B5X2M8…	// A0A1S3QDX6 // A0A1S3M645 // A0A1S3QL53 // A0A1S3L4V4 // A0A1S3PLW1 // A0A1S3PJM7 // A0A1S3S8M2 // A0A1S3KXH5 // A0A1S3RQS8 // A0A1S3KXH0 // C0HBF6 // A0A1S3KXH2 // A0A1S3L0F4 // A0A1S3MQR0 // A0A1S3QY19 // A0A1S3MF27 // A0A1S3KRM2 // A0A1S3LVB0 // A0A1S3LQ91 // B5XDN0 // A0A1S3LQ97 // A0A1S3MF29 // A0A1S3PRU8 // A0A1S3QNW5 // A0A1S3LM37 // A0A1S3LM30 // A0A1S3QNW3 // B5X8F3 // C0H9F5 // C0H9F0…
GO:0043229	CC	intracellular organelle	209	606	34.4884	13583	65384	20.7742	1.66016	7.3e-10	1.9e-08	// B5DGK7 // A9Y0C7 // B5X3R3 // B5XFQ0 // B5DGK9 // B9ELH2 // B9ELK0 // B5X5B2 // Q78BU2 // P84408 // B5X592 // C0H9E1 // B5X4W9 // B5X911 // C0H7M0 // B5DG02 // C0HAE8 // B5X186 // B5XGU1 // B9EN30 // B5DGL1 // B5X361 // B5XFE9 // B9EQA0 // B5X369 // B5X767 // B5XDP1 // C0HAB0 // C0HB84 // B5RI77 // B5DGU4 // B5X4A5 // C0PU77 // C0PU76 // B5RI58 // B5DG96 // B5X2M3 // B3SUE5 // B5X0X6 // C0HBA2…	// A0A1S3QDX6 // A0A1S3M645 // A0A1S3QL53 // A0A1S3L4V4 // A0A1S3PLW1 // A0A1S3PJM7 // A0A1S3S8M2 // A0A1S3KXH5 // A0A1S3RQS8 // A0A1S3KXH0 // C0HBF6 // A0A1S3KXH2 // A0A1S3L0F4 // A0A1S3MQR0 // A0A1S3QY19 // A0A1S3MF27 // A0A1S3KRM2 // A0A1S3LVB0 // A0A1S3LQ91 // B5XDN0 // A0A1S3LQ97 // A0A1S3MF29 // A0A1S3PRU8 // A0A1S3QNW5 // A0A1S3LM37 // A0A1S3LM30 // A0A1S3QNW3 // B5X8F3 // C0H9F5 // C0H9F0…
GO:0043227	CC	membrane-bounded organelle	128	606	21.1221	10448	65384	15.9794	1.32183	0.0029	0.03	// A9Y0C7 // B5X5B2 // P84408 // P68529 // C0HAI2 // B5X4W9 // B5X911 // B5XAF2 // B5X186 // B5X361 // B9EQA0 // B5X767 // C0HAB0 // B5DGU5 // B5DGU4 // B5X4A5 // C0PU77 // B5XEN0 // B5X3S5 // B5X2M8 // B5DG96 // B5DGD5 // B3SUE5 // B5X0X6 // C0HBA2 // C0H944 // B3SUE9 // B5X3T4 // C0HBS0 // B5X371 // C0HAC4 // B5X6J8 // B5X6S0 // B9ELI1 // B5X1Y1 // B5DGE8 // B5XET7 // C0HA06 // B3SUD0 // B5XBU1…	// A0A1S3QDX6 // A0A1S3QL53 // A0A1S3L4V4 // A0A1S3PLW1 // A0A1S3PJM7 // A0A1S3S8M2 // A0A1S3KXH5 // A0A1S3KXH0 // C0HBF6 // A0A1S3KXH2 // A0A1S3L0F4 // A0A1S3MQR0 // A0A1S3MF27 // A0A1S3LQ91 // A0A1S3LQ97 // A0A1S3MF29 // A0A1S3QNW5 // A0A1S3LM37 // A0A1S3LM30 // A0A1S3QNW3 // B5X8F3 // B5X208 // B5X207 // A0A1S3RIG2 // A0A1S3NK55 // B5X8F8 // A0A1S3NK52 // B5X201 // A0A1S3NK50 // A0A1S3LBR6 // …
GO:0016639	MF	oxidoreductase activity, acting on the CH-NH2 group of donors, NAD or NADP as acceptor	5	606	0.825083	9	65384	0.0137648	59.9413	8.6e-09	3.6e-07	// C0HA51 // Q7ZZL0 // Q7T1N7 // Q7ZZK9 // Q7ZZK8	// A0A1S3Q4M8 // B5X1B8 // C0HA51 // C0PUN2 // B5X0T5 // Q7ZZK9 // Q7ZZK8 // Q7ZZL0 // Q7T1N7
GO:0051920	MF	peroxiredoxin activity	5	606	0.825083	25	65384	0.0382357	21.5789	3.2e-06	8.2e-05	// B5X8H5 // B5X5Q6 // B5X9Q1 // B5X9L4 // B5X7X7	// B5X9Q1 // B5X6K7 // B5X9L4 // A0A1S3RI85 // B5RIA7 // B5XFD8 // A0A1S3PAZ6 // B5X5Q6 // B5XAN1 // B5XCW3 // B5XFN6 // B5XBY3 // A0A1S3PBC6 // A0A1S3L1Z2 // A0A1S3RRY2 // B5X8N9 // B5XEA6 // B5X8H5 // A0A1S3R4A3 // B5XFI4 // M4VHL9 // B5X838 // B5XCE0 // B5X7X7 // A0A1S3L0Y0
GO:0004298	MF	threonine-type endopeptidase activity	16	606	2.64026	113	65384	0.172825	15.2771	1.7e-14	2.5e-12	// C0H856 // B5X9F8 // B5X6N3 // B5XGP5 // B5X9D0 // B5XFH8 // B5XGI9 // B5DGG1 // B5XAG6 // B5RI58 // B5XCL4 // B5XD66 // B5DGJ1 // B5DG53 // B5DGU5 // B5DGU4	// B5XG11 // B5XAV2 // Q9DE53 // Q9DE54 // B5X5B1 // B5XG15 // A0A1S3KLM0 // A0A1S3KLM6 // A0A1S3NQV8 // B5XA59 // B5X916 // B5XAY5 // B5XA50 // Q9DD33 // A7KII5 // B5XGN5 // A7KII6 // B5XFW6 // B5XGG8 // B5X768 // B5XG29 // B5X8Y8 // B5X8N6 // B5DGU3 // B5DGU5 // B9EM89 // B9EML1 // B5X6T8 // B5XFE8 // B5RI58 // B5XCG8 // B9EM13 // B5XFB6 // B5XAG6 // B9EM90 // B5X619 // A0A1S3M187 // A0A1S3QXH3…
GO:0070003	MF	threonine-type peptidase activity	16	606	2.64026	113	65384	0.172825	15.2771	1.7e-14	2.5e-12	// C0H856 // B5X9F8 // B5X6N3 // B5XGP5 // B5X9D0 // B5XFH8 // B5XGI9 // B5DGG1 // B5XAG6 // B5RI58 // B5XCL4 // B5XD66 // B5DGJ1 // B5DG53 // B5DGU5 // B5DGU4	// B5XG11 // B5XAV2 // Q9DE53 // Q9DE54 // B5X5B1 // B5XG15 // A0A1S3KLM0 // A0A1S3KLM6 // A0A1S3NQV8 // B5XA59 // B5X916 // B5XAY5 // B5XA50 // Q9DD33 // A7KII5 // B5XGN5 // A7KII6 // B5XFW6 // B5XGG8 // B5X768 // B5XG29 // B5X8Y8 // B5X8N6 // B5DGU3 // B5DGU5 // B9EM89 // B9EML1 // B5X6T8 // B5XFE8 // B5RI58 // B5XCG8 // B9EM13 // B5XFB6 // B5XAG6 // B9EM90 // B5X619 // A0A1S3M187 // A0A1S3QXH3…
GO:0005200	MF	structural constituent of cytoskeleton	12	606	1.9802	105	65384	0.16059	12.3308	3.9e-10	3.3e-08	// C0PU76 // A7KJD9 // B5XFE9 // B5DGE8 // C0H808 // Q2ERI0 // B5DH01 // B5DH02 // C0HBL4 // B5X0U5 // B5X3H7 // B9EN30	// A0A1S3LU97 // A0A1S3L0N8 // A0A1S3P0J6 // A0A1S3KYB2 // A0A1S3LME8 // B9EMM4 // A0A1S3SZ40 // A0A1S3REW2 // A0A1S3MB10 // A0A1S3PES9 // A0A1S3L112 // A0A1S3PES7 // C0PU76 // A0A1S3RJ34 // A0A1S3RJ33 // A0A1S3NQ56 // B5XFE9 // A0A1S3MAJ2 // A0A1S3KVT5 // A0A1S3RCE4 // A7KIJ4 // A0A1S3MQY2 // A0A1S3MHP9 // A0A1S3RJ29 // A0A1S3P0L0 // A0A1S3LAS3 // A0A1S3L0S3 // A0A1S3P0L9 // A0A1S3N4F3 // A0A1S3…
GO:0051082	MF	unfolded protein binding	15	606	2.47525	140	65384	0.21412	11.5601	7e-12	6.9e-10	// B5DG64 // B9EMS3 // U5KQ14 // B5X2M8 // B5RI17 // B5X4M2 // C0HBK7 // B5X1Z2 // U5KQM7 // Q9W6K6 // U5KR11 // C0PUU5 // C0HAF8 // C0HBB4 // C0HAB6	// A0A1S3NS46 // A0A1S3RRD2 // A0A1S3QPN8 // A0A1S3LG94 // A0A1S3MN98 // A0A1S3QKA6 // A0A1S3L7N1 // A0A1S3SWX8 // B9EPE9 // A0A1S3LHD8 // B5XBF7 // C0HBK7 // B5X685 // A0A1S3MP94 // B5X207 // A0A1S3T539 // A0A1S3LI86 // C0HAB6 // A0A1S3QID6 // B5X2M8 // B5X7T9 // B5X9Z0 // A0A1S3MHB8 // A0A1S3KQ60 // A0A1S3S1N7 // A0A1S3M181 // A0A1S3L4C5 // A0A1S3QB94 // A0A1S3KXV0 // A0A1S3QZZ7 // A0A1S3RTF3 /…
GO:0016860	MF	intramolecular oxidoreductase activity	8	606	1.32013	77	65384	0.117766	11.2098	6.8e-07	2.1e-05	// D0QEL0 // B5DGL3 // B5X1P6 // C0H9M4 // B5X1H7 // B5X4R2 // B5XB51 // C0PU58	// A0A1S3QF86 // A0A1S3M5J5 // A0A1S3R1M3 // A0A1S3MXN3 // A0A1S3LT56 // A0A1S3NCU0 // A0A1S3MTQ5 // A0A1S3LAF4 // A0A1S3R491 // A0A1S3QX20 // B5XB51 // B5XD43 // B5X4S3 // A0A1S3L6Z8 // A0A1S3MWE5 // A0A1S3P4R2 // C0H9M4 // B5XB10 // A0A1S3NFY1 // A0A1S3RQQ8 // A0A1S3MWA7 // B5DGL3 // A0A1S3NBY7 // A0A1S3PHS4 // B5XGF1 // B5X1H7 // A0A1S3PHQ7 // A0A1S3MSJ8 // A0A1S3PZN5 // A0A1S3QAY5 // B5X2D1 /…
GO:0003735	MF	structural constituent of ribosome	48	606	7.92079	486	65384	0.743301	10.6562	1.5e-32	9.1e-30	// B5DGK7 // C0H7H1 // B9EMI7 // B5DGV2 // B5DGV3 // B5X7I1 // B5XFQ0 // B5DGX5 // A7KIL2 // B5DGX3 // B5X8X3 // B5DGX1 // B5X771 // B9ELK0 // C0H7G0 // B5X5W5 // B5X5S8 // B5XDA7 // B5XG87 // C0H7M0 // B5DG02 // C0H779 // B5XGU1 // B5X4H4 // B5X668 // B5DGY4 // C0H8L1 // B5DGW8 // B5X369 // C0H8L4 // C0H8D1 // B5X6R2 // B5DGV7 // B5DGK9 // B5XG35 // B5DGJ6 // B5X7R3 // B9ELY8 // B5DGB6 // B5X6X8…	// B9EPU0 // B9EQB9 // C0H7J7 // A0A1S3N6S7 // B5XC98 // B5RI65 // B5X9J1 // B5X7S7 // B5RI62 // C0H8C7 // B9EQ57 // B5X599 // B5X7J4 // C0H7M1 // C0H7M0 // B5DG02 // B5DG01 // B5X841 // B5X840 // C0H7M9 // A0A1S3MSB2 // B5DGL2 // B5DGL6 // A0A1S3R084 // B5DGL8 // B5X369 // A0A1S3RYQ8 // A0A1S3Q485 // A0A1S3PV74 // A0A1S3RSI8 // A0A1S3LIE9 // B5XCV1 // B9EP20 // B5DH21 // B5DH20 // B5X9S4 // B5XF…
GO:0050661	MF	NADP or NADPH binding	6	606	0.990099	63	65384	0.0963538	10.2757	2.8e-05	0.00048	// Q2A665 // B5X3K2 // B5XE59 // B5X3C0 // C0H9U3 // B5X0U9	// A0A1S3M6N2 // B5XG76 // A0A1S3MDK8 // C0H8T5 // B5X5Z9 // B5X3C0 // A0A1S3PYV6 // B5DGR2 // B5DGR3 // A0A1S3MS12 // B5DGR5 // A0A1S3S0U7 // B9EPQ4 // B5X0U9 // B5X3N8 // A0A1S3QUL6 // C0H9E7 // A0A1S3RMI3 // A0A1S3PGI2 // A0A1S3MH94 // A0A1S3LP94 // A0A1S3LE38 // A0A1S3LNH6 // A0A1S3T6U0 // Q2A665 // A0A1S3T6U2 // A0A1S3T6U3 // A0A1S3S016 // A0A1S3QM44 // A0A1S3NJT5 // A0A1S3SXH6 // A0A1S3M618…
GO:0003746	MF	translation elongation factor activity	13	606	2.14521	144	65384	0.220237	9.74047	1.4e-09	9.5e-08	// B5X6L3 // C0HBS1 // B9EQ77 // C0HAL2 // B5XA53 // C0H9C3 // C0HBD9 // B5X8P4 // C0H7V4 // B5RI37 // B5XFY9 // B5DGP8 // B9EL07	// A0A1S3PHF9 // A0A1S3PWA0 // C0PTZ4 // B9EL07 // B9EMV4 // A0A1S3QRF1 // B5XA53 // A0A1S3PAU2 // B5X9E6 // B9EMD4 // B5X996 // A0A1S3MLQ7 // A0A1S3KWH4 // A0A1S3Q8C1 // A0A1S3RGG1 // A0A1S3NTM5 // A0A1S3M0R0 // B9ENT5 // B5X9R1 // B9ENT0 // A0A1S3T5F4 // B5X6L3 // C0H9N2 // A0A1S3P4S9 // A0A1S3M0P6 // B5X6T0 // A0A1S3PCH6 // A0A1S3KXI6 // B5X201 // B5X727 // A0A1S3KWP4 // B9ELG6 // A0A1S3P605 /…
GO:0016620	MF	oxidoreductase activity, acting on the aldehyde or oxo group of donors, NAD or NADP as acceptor	6	606	0.990099	68	65384	0.104001	9.52009	4.4e-05	0.00072	// B5X0S9 // B5X3K2 // Q2A665 // C0HBA2 // C0H8W3 // B5X3U4	// B5X2H6 // B5XG76 // A0A1S3T2Q8 // A0A1S3RB08 // A0A1S3MZQ3 // B5X0S9 // B5X5Z9 // A0A1S3PU01 // A0A1S3MJT1 // B5DGR2 // B5DGR3 // A0A1S3QJP4 // B5DGR5 // A0A1S3M3M4 // A0A1S3T2S1 // A0A1S3R3M9 // A0A1S3N0G3 // B5X475 // A0A1S3NL59 // A0A1S3Q5D8 // A0A1S3R7N3 // A0A1S3NLN2 // A0A1S3PYV6 // A0A1S3LE13 // A0A1S3KWH2 // A0A1S3NER7 // A0A1S3QJZ0 // C0HBA2 // A0A1S3KUK7 // B5X4I4 // A0A1S3MZC1 // Q2…
GO:0016903	MF	oxidoreductase activity, acting on the aldehyde or oxo group of donors	8	606	1.32013	91	65384	0.139178	9.48522	2.5e-06	6.6e-05	// Q2A665 // B5X485 // B5X3K2 // B5X0S9 // C0HBA2 // B5X4R5 // C0H8W3 // B5X3U4	// A0A1S3MZQ3 // A0A1S3RIQ4 // A0A1S3NLN2 // A0A1S3MIZ7 // A0A1S3Q5D8 // A0A1S3R7N3 // A0A1S3KWH2 // A0A1S3QYR3 // A0A1S3NEM6 // A0A1S3NM50 // A0A1S3S2J1 // B5X475 // C0PUQ6 // A0A1S3P376 // A0A1S3NHE5 // A0A1S3NMP8 // B5X5Z9 // A0A1S3QSX1 // B5X2T3 // B5X3K2 // A0A1S3PYV6 // B5X2E3 // A0A1S3MBC5 // A0A1S3PJM5 // A0A1S3M373 // A0A1S3QC57 // C0LJJ0 // A0A1S3R3M9 // B5X0S9 // A0A1S3QJZ0 // A0A1S3T3…
GO:0019205	MF	nucleobase, nucleoside, nucleotide kinase activity	8	606	1.32013	105	65384	0.16059	8.22052	7.2e-06	0.00016	// B5XCJ8 // B5DGM5 // B5DGC6 // B5DFY2 // B5XE35 // B5XCA1 // B5DGF0 // C0PUV7	// A0A1S3LYT1 // A0A1S3S795 // A0A1S3LI38 // A0A1S3R5N6 // A0A1S3L4I9 // A0A1S3KJA5 // A0A1S3RDQ1 // A0A1S3QSY0 // A0A1S3PZF2 // A0A1S3P9N1 // A0A1S3R5J6 // A0A1S3MG06 // B5DGC6 // A0A1S3KJP4 // B5XCD3 // A0A1S3RT52 // A0A1S3LZ09 // A0A1S3LUK2 // B5X3S3 // B5XAW0 // B5XF49 // A0A1S3NNA2 // C0H8Q7 // A0A1S3SBG2 // A0A1S3PTI2 // A0A1S3LTE0 // A0A1S3SBG4 // B5XC23 // A0A1S3PB19 // B5XC27 // B5DGM5 /…
GO:0016859	MF	cis-trans isomerase activity	8	606	1.32013	111	65384	0.169766	7.77617	1.1e-05	0.00022	// B9EL76 // B5XDR0 // B9EPT4 // B9ELK2 // B5DG94 // C0HBH7 // B5XCI6 // B5XCW1	// A0A1S3M4J4 // A0A1S3NYX3 // B5XAV8 // B5XBN0 // A0A1S3P6Z5 // A0A1S3M6U3 // C0HBF0 // A0A1S3LG74 // C0H7R0 // A0A1S3NYW4 // B5XGN0 // A0A1S3Q7I9 // B9EP17 // A0A1S3QNF2 // A0A1S3LQE2 // A0A1S3LPC7 // B5DGL5 // B5RI81 // A0A1S3R9A4 // A0A1S3S9F4 // A0A1S3NWU8 // B5X8F5 // B5X200 // B5X5R4 // B5X2M4 // A0A1S3PHM2 // B5DG94 // B9ELP0 // B5X469 // A0A1S3PI79 // B5X5H7 // A0A1S3NJ24 // B5XET3 // C0…
GO:0016836	MF	hydro-lyase activity	8	606	1.32013	111	65384	0.169766	7.77617	1.1e-05	0.00022	// C0PU77 // B5XE59 // B5X348 // B9EPV2 // B5X1B5 // B5X4N7 // B5DGQ7 // I0J1J2	// A0A1S3RM23 // A0A1S3LH13 // A0A1S3MV67 // A0A1S3S1F2 // A0A1S3PWI0 // A0A1S3MU63 // A0A1S3RAQ9 // A0A1S3L6V8 // A0A1S3PPW1 // A0A1S3L8M9 // A0A1S3RNL9 // A0A1S3N6C0 // A0A1S3PPQ3 // A0A1S3Q086 // A0A1S3R7G1 // B9EPV2 // A0A1S3LZJ7 // B5X5R6 // A0A1S3KY67 // B5X4N7 // A0A1S3MB22 // A0A1S3SZM5 // A0A1S3PQZ8 // A0A1S3L040 // A0A1S3LZK2 // A0A1S3R8S7 // A0A1S3LZK1 // C0H9X3 // A0A1S3KJC7 // A0A1S3…
GO:0003755	MF	peptidyl-prolyl cis-trans isomerase activity	8	606	1.32013	111	65384	0.169766	7.77617	1.1e-05	0.00022	// B9EL76 // B5XDR0 // B9EPT4 // B9ELK2 // B5DG94 // C0HBH7 // B5XCI6 // B5XCW1	// A0A1S3M4J4 // A0A1S3NYX3 // B5XAV8 // B5XBN0 // A0A1S3P6Z5 // A0A1S3M6U3 // C0HBF0 // A0A1S3LG74 // C0H7R0 // A0A1S3NYW4 // B5XGN0 // A0A1S3Q7I9 // B9EP17 // A0A1S3QNF2 // A0A1S3LQE2 // A0A1S3LPC7 // B5DGL5 // B5RI81 // A0A1S3R9A4 // A0A1S3S9F4 // A0A1S3NWU8 // B5X8F5 // B5X200 // B5X5R4 // B5X2M4 // A0A1S3PHM2 // B5DG94 // B9ELP0 // B5X469 // A0A1S3PI79 // B5X5H7 // A0A1S3NJ24 // B5XET3 // C0…
GO:0016835	MF	carbon-oxygen lyase activity	8	606	1.32013	121	65384	0.185061	7.13351	2e-05	0.00039	// C0PU77 // B5XE59 // B5X348 // B9EPV2 // B5X1B5 // B5X4N7 // B5DGQ7 // I0J1J2	// A0A1S3RM23 // A0A1S3LH13 // A0A1S3N381 // A0A1S3S1F2 // A0A1S3PWI0 // A0A1S3MU63 // A0A1S3RAQ9 // A0A1S3L6V8 // A0A1S3PPW1 // A0A1S3L8M9 // A0A1S3RNL9 // A0A1S3N6C0 // A0A1S3PPQ3 // A0A1S3Q086 // A0A1S3R7G1 // B9EPV2 // A0A1S3LZJ7 // B5X5R6 // A0A1S3KY67 // B5X4N7 // A0A1S3MB22 // A0A1S3LH32 // A0A1S3SZM5 // A0A1S3PQZ8 // A0A1S3L040 // A0A1S3LZK2 // A0A1S3R8S7 // A0A1S3LZK1 // A0A1S3RS56 // A0…
GO:0016853	MF	isomerase activity	22	606	3.63036	345	65384	0.527652	6.88022	4.4e-12	5.3e-10	// B9ELK2 // C0H9M4 // C0H7J1 // B5X291 // B5XB51 // B5XDR0 // C0HBH7 // B5X1H7 // B5XCW1 // C0HAW6 // B5DGL3 // B9EPT4 // B5X4R2 // B5RIB0 // B5DGU0 // B5X0R8 // D0QEL0 // B9EL76 // B5X1P6 // B5DG94 // B5XCI6 // C0PU58	// A0A1S3M4J4 // A0A1S3QF86 // C0H9M4 // C0H7J1 // B5X291 // A0A1S3MSE7 // B5XAV8 // A0A1S3R491 // A0A1S3PLW1 // C0HBF0 // B5XGF1 // A0A1S3QPN7 // A0A1S3LVB0 // A0A1S3LVB5 // A0A1S3LPC7 // B5DGL3 // B5DGL5 // A0A1S3KLR8 // B5X8F5 // B5X200 // B5X5R4 // A0A1S3PV75 // A0A1S3MIQ1 // A0A1S3P6Y2 // B5XB51 // B5X4Y3 // A0A1S3PI79 // A0A1S3QLX7 // A0A1S3LGS6 // A0A1S3PM71 // B5XCH3 // A0A1S3NZC9 // B5RI…
GO:0016776	MF	phosphotransferase activity, phosphate group as acceptor	7	606	1.15512	113	65384	0.172825	6.68372	0.0001	0.0014	// B5XCJ8 // B5DGM5 // B5DGC6 // B5DFY2 // B5XE35 // B5XCA1 // C0PUV7	// A0A1S3LYT1 // A0A1S3KPH9 // A0A1S3KNQ1 // A0A1S3MDM2 // A0A1S3R5N6 // A0A1S3MPG3 // A0A1S3RDQ1 // A0A1S3PZF2 // A0A1S3KNI3 // A0A1S3R5J6 // A0A1S3MDE2 // B5DGC6 // A0A1S3KPH4 // A0A1S3LZ09 // A0A1S3SUT6 // B5X3S3 // A0A1S3MD21 // A0A1S3KPI3 // B5XAW0 // B5XE35 // B5XCD3 // A0A1S3SBG2 // A0A1S3KNQ6 // A0A1S3LTE0 // A0A1S3SBG4 // A0A1S3KNB5 // A0A1S3MCT8 // B5DGM5 // B5DGM6 // A0A1S3PRM9 // A0A1…
GO:0005544	MF	calcium-dependent phospholipid binding	6	606	0.990099	100	65384	0.152943	6.47366	0.00037	0.0048	// B5XCU8 // B5X1G1 // B5X865 // B5RI22 // B5X1W5 // B5XCE7	// A0A1S3PUV4 // A0A1S3PH49 // A0A1S3N085 // A0A1S3PW64 // A0A1S3LPK1 // A0A1S3M8N6 // A0A1S3MM94 // A0A1S3RSS7 // A0A1S3M7G8 // B5X999 // A0A1S3N0R6 // A0A1S3PUW0 // A0A1S3PZE0 // A0A1S3PDX9 // B5XBM7 // B5X1X1 // A0A1S3MMA0 // A0A1S3NM97 // A0A1S3KQ66 // A0A1S3Q9B1 // A0A1S3ML75 // A0A1S3QIJ7 // A0A1S3T2N8 // A0A1S3L6C5 // B5X865 // A0A1S3LLN0 // A0A1S3PZL4 // A0A1S3QHR9 // A0A1S3P1K3 // A0A1S3…
GO:0019904	MF	protein domain specific binding	8	606	1.32013	142	65384	0.217179	6.07856	6.3e-05	0.001	// B5X4L8 // B5DGB9 // B5DFX5 // B5XE69 // B5XDU3 // C0HA31 // B5XCY4 // B5X330	// A0A1S3S4C1 // A0A1S3NSB9 // A0A1S3RR65 // A0A1S3QE35 // A0A1S3RR60 // A0A1S3T030 // A0A1S3MAZ4 // D2SQZ9 // A0A1S3T035 // A0A1S3T036 // D2SR00 // A0A1S3RFL5 // A0A1S3RRR2 // A0A1S3SNE4 // A0A1S3S7N7 // A0A1S3QTN0 // A0A1S3RRT5 // A0A1S3SSP5 // A0A1S3RPQ7 // A0A1S3SW32 // A0A1S3MBB0 // A0A1S3MYK0 // A0A1S3RCJ7 // A0A1S3RR96 // A0A1S3RGT7 // A0A1S3T025 // A0A1S3T024 // A0A1S3T023 // A0A1S3T020 /…
GO:0005198	MF	structural molecule activity	70	606	11.5512	1261	65384	1.92861	5.98938	1.8e-30	5.5e-28	// B5DGK7 // C0H7H1 // B5DH01 // B9EMI7 // A7KJD9 // B5DGV2 // B5DGV3 // B5X7I1 // B5XFQ0 // C0PUP9 // A7KIL2 // B5DGX3 // B5X8X3 // B5DGX1 // C0H7G0 // B9ELK0 // C0HBL4 // B5X0U5 // B5DGK9 // B1H3N9 // B5X668 // B5DGE8 // A7KE05 // B5X5W5 // B5X5S8 // B5XDA7 // B5XG87 // C0H7M0 // B5DG02 // B9EN30 // B5X4H4 // C0H808 // C0H779 // B5X3H7 // B5X3S5 // B5XGU1 // B9EQ28 // B5X4X1 // B5X771 // B5DGX5…	// A0A1S3Q572 // B9EPU0 // A0A1S3Q571 // B9EQB9 // A0A1S3P0J6 // A0A1S3QBC6 // A0A1S3KYT1 // A0A1S3R0V4 // A0A1S3QG25 // A0A1S3N6S7 // A0A1S3RNG1 // C0H753 // A0A1S3QUF1 // A0A1S3S654 // A0A1S3LME8 // A0A1S3M1W6 // B5XC98 // B5RI65 // B5X9J1 // B5X7S7 // A0A1S3QV45 // B5RI62 // A0A1S3Q577 // A0A1S3R4F9 // C0H8C7 // A0A1S3RQS8 // A0A1S3RLP3 // A0A1S3QYA2 // A0A1S3MWG7 // B9EQ57 // B5X599 // B5X7D0…
GO:0016638	MF	oxidoreductase activity, acting on the CH-NH2 group of donors	5	606	0.825083	91	65384	0.139178	5.92826	0.0017	0.02	// C0HA51 // Q7ZZL0 // Q7T1N7 // Q7ZZK9 // Q7ZZK8	// A0A1S3Q4M8 // A0A1S3NMW6 // A0A1S3N5A6 // A0A1S3S0U7 // A0A1S3KVD7 // A0A1S3T136 // A0A1S3M0A5 // A1X3R7 // A1X3R6 // A1X3R1 // A1X3R0 // A1X3R3 // A1X3R2 // A0A1S3M0R2 // Q7ZZK8 // A0A1S3RAR4 // A1X3Q8 // A1X3Q9 // B3TDD5 // A0A1S3Q9D2 // A1X3Q1 // A1X3Q2 // A1X3Q3 // A1X3Q4 // A1X3Q7 // A0A1S3NPN3 // B5RIC8 // A0A1S3MPA9 // Q7T1N7 // A1X3P7 // A1X3P6 // A1X3P5 // A1X3P4 // A1X3P3 // A1X3P2 /…
GO:0016616	MF	oxidoreductase activity, acting on the CH-OH group of donors, NAD or NADP as acceptor	9	606	1.48515	196	65384	0.299768	4.95433	0.00011	0.0015	// C0PU77 // C0H976 // C0HAI2 // B5X3E6 // C0H868 // C0H820 // C0H9U3 // B5DGS2 // B5XAM9	// A0A1S3L755 // A0A1S3M6N2 // A0A1S3RM23 // A0A1S3LI37 // A0A1S3L1N6 // B5DFT8 // A0A1S3RTD3 // B5X752 // A0A1S3QYA4 // A0A1S3N134 // C0HAI2 // C0H9E7 // B5X3J9 // B5X9E4 // A0A1S3M618 // A0A1S3RNL9 // A0A1S3SUT7 // A0A1S3RTA3 // A0A1S3MJ16 // A0A1S3LVB7 // A0A1S3MUA3 // B5X682 // A0A1S3MM09 // A0A1S3QI12 // A0A1S3LJF5 // A0A1S3KYD4 // A0A1S3STI9 // A0A1S3PW79 // B5X4A9 // A0A1S3P3B2 // A0A1S3RP…
GO:0016614	MF	oxidoreductase activity, acting on CH-OH group of donors	9	606	1.48515	207	65384	0.316591	4.69106	0.00017	0.0022	// C0PU77 // C0H976 // C0HAI2 // B5X3E6 // C0H868 // C0H820 // C0H9U3 // B5DGS2 // B5XAM9	// A0A1S3L755 // A0A1S3M6N2 // A0A1S3RM23 // A0A1S3LI37 // A0A1S3L1N6 // B5DFT8 // A0A1S3RTD3 // B5X752 // A0A1S3LME1 // A0A1S3QYA4 // A0A1S3N134 // C0HAI2 // C0H9E7 // B5X3J9 // B5X9E4 // A0A1S3M618 // A0A1S3RNL9 // A0A1S3SUT7 // A0A1S3RTA3 // A0A1S3MJ16 // A0A1S3LVB7 // A0A1S3MUA3 // B5X682 // A0A1S3MM09 // A0A1S3QI12 // A0A1S3LJF5 // A0A1S3KYD4 // A0A1S3STI9 // A0A1S3PW79 // B5X4A9 // A0A1S3P3…
GO:0008135	MF	translation factor activity, nucleic acid binding	22	606	3.63036	568	65384	0.868714	4.17901	4.4e-08	1.6e-06	// B5X6J8 // C0H9C3 // B5X8P4 // C0H7V4 // C0H9I7 // B9ENH4 // B5DGP8 // B9EQ77 // B5XA53 // C0HBD9 // B5XFY9 // C0HBS1 // B9EL07 // B5X6L3 // B5XAS7 // B5RI37 // C0HA50 // B5DGH9 // C0H9S0 // C0HAL2 // B9ENG2 // B5XEJ7	// B9EPU2 // A0A1S3LCY7 // A0A1S3R5W7 // A0A1S3SEP1 // B5X6P0 // A0A1S3M2Z4 // B9ENF1 // B5XA53 // B9ENF7 // B5X9E6 // B5DG04 // A0A1S3PCC0 // B5X189 // A0A1S3MLQ7 // A0A1S3QWR5 // A0A1S3LQ97 // A0A1S3L5L4 // B9ENT5 // B9ENT0 // A0A1S3SB26 // A0A1S3LW68 // A0A1S3LHV3 // B5X201 // A0A1S3QS04 // A0A1S3NPU8 // B5X7T5 // B5XDQ8 // A0A1S3T1Q8 // A0A1S3SNN1 // A0A1S3KRL9 // A0A1S3SNN4 // B5X6J8 // A0A1…
GO:0046982	MF	protein heterodimerization activity	7	606	1.15512	188	65384	0.287532	4.01734	0.0021	0.024	// B9EQA0 // B5X911 // B5XEY5 // B9EN25 // B5X5B2 // B5XBU1 // B5X851	// A0A1S3SGV1 // A0A1S3RN35 // A0A1S3LCY7 // A0A1S3MKR4 // B5X5B2 // A0A1S3R3V7 // B5X351 // A0A1S3RH46 // A0A1S3PDY5 // A0A1S3S0Z8 // A0A1S3MGV2 // A0A1S3MDE4 // A0A1S3MJE4 // A0A1S3MKC4 // A0A1S3SGU2 // A0A1S3SF64 // B5X911 // A0A1S3MKM7 // A0A1S3M4V5 // A0A1S3PDQ7 // A0A1S3KWQ2 // A0A1S3SX69 // A0A1S3Q1S3 // A0A1S3Q1S0 // A0A1S3P4H1 // A0A1S3NTC7 // A0A1S3R0U0 // A0A1S3PRU9 // B5XG24 // A0A1S3…
GO:0003924	MF	GTPase activity	31	606	5.11551	858	65384	1.31225	3.89828	5.4e-10	4e-08	// B5XG74 // A7KJD9 // B5XE81 // B9ENL7 // B5DG90 // C0HBL4 // B5X0U5 // B5X4F0 // B5DGE8 // B5XEM8 // C0H9C3 // C0HBD9 // Q0PHC9 // B5X2S5 // B9EN30 // C0H808 // B5X3H7 // C0HBS1 // B9EMH1 // C0PU76 // Q9PSX2 // B5X6L3 // C0HA50 // B5XET7 // B5X127 // B9ELU2 // B5XFE9 // C0HAL2 // Q2ERI0 // B5DH01 // B5DH02	// B5X445 // A0A1S3Q3K8 // A0A1S3P0J6 // A0A1S3P572 // A0A1S3STF6 // A0A1S3NS98 // A0A1S3RR63 // A0A1S3M9I8 // B5XFB4 // A0A1S3Q0E6 // A0A1S3PE67 // A0A1S3PA01 // B5X4F0 // B5X1J7 // B9ENF2 // B5X0Q2 // A0A1S3PFE9 // B5X0Q1 // A0A1S3LKQ5 // A0A1S3RCD0 // A0A1S3RC26 // A0A1S3SX64 // A0A1S3RCD8 // A0A1S3SCL6 // A0A1S3NJT8 // A0A1S3M1E7 // A0A1S3NYY2 // A0A1S3LKA9 // A0A1S3KRE6 // A0A1S3P276 // A0A1…
GO:0016829	MF	lyase activity	13	606	2.14521	383	65384	0.58577	3.66221	8.5e-05	0.0012	// C0PU77 // B5X4N7 // B5X1D9 // B5XE59 // B5X348 // B9EPV2 // B5X1B5 // B5X1V6 // B5DGQ7 // B5X130 // I0J1J2 // I0J1J3 // C0H9I1	// A0A1S3NIT2 // A0A1S3RM23 // A0A1S3NUH7 // A0A1S3NW86 // B5X4F3 // A0A1S3R6Y8 // B5XE29 // A0A1S3PWI0 // A0A1S3T1H5 // A0A1S3PPW1 // A0A1S3NA62 // A0A1S3RNL9 // A0A1S3T436 // A0A1S3R7G1 // A0A1S3N6J2 // A0A1S3QF18 // B5X5R6 // A0A1S3R2A6 // A0A1S3LSK1 // A0A1S3LH32 // A0A1S3KRL1 // A0A1S3SZM5 // A0A1S3RBL7 // A0A1S3L295 // A0A1S3KY97 // C0H9X3 // A0A1S3NYB1 // A0A1S3NYB2 // A0A1S3NZZ4 // A0A1S3…
GO:0000287	MF	magnesium ion binding	11	606	1.81518	348	65384	0.53224	3.41045	0.00052	0.0066	// B5X373 // B5X8C7 // B5DGS2 // B5XGF6 // B5X1B5 // C0H8V1 // B5DGQ7 // B5XD19 // B5DGU1 // B5X4I8 // I0J1J2	// A0A1S3NT29 // A0A1S3MFV9 // A0A1S3RKM7 // A0A1S3RTX9 // A0A1S3RQS2 // A0A1S3R658 // A0A1S3L0F8 // B5XGF6 // A0A1S3LPC0 // A0A1S3LPC6 // A0A1S3SX61 // A0A1S3LWS7 // A0A1S3SXH9 // A0A1S3LWS8 // A0A1S3LV01 // A0A1S3RIJ9 // A0A1S3Q4E2 // A0A1S3PUG3 // A0A1S3SBX8 // A0A1S3LI97 // A0A1S3SNP8 // A0A1S3RWA7 // C0H878 // A0A1S3MRD1 // A0A1S3NRS8 // A0A1S3P9H5 // A0A1S3KVG2 // A0A1S3NI08 // A0A1S3T0F4 /…
GO:0015078	MF	hydrogen ion transmembrane transporter activity	10	606	1.65017	333	65384	0.509299	3.24007	0.0013	0.016	// P68529 // B5DGC9 // B5X3C7 // B5DG78 // C0H9X1 // B5RI36 // B5X6S0 // B5RI88 // B5X1Y1 // B5X195	// E2JDK0 // A0A1S3S5I8 // A0A1S3QHE6 // B5DGK3 // E2JDK6 // C8Z1V9 // B5X3C7 // A0A1S3NMN9 // C8Z1V4 // B5X161 // A0A1S3S5I6 // A0A1S3S5I4 // C8Z1V1 // B5X5B0 // B5RIB1 // B5X7S2 // B5DGH4 // A0A1S3KSX8 // B5X597 // B5X4L5 // A0A1S6XUN4 // B5XCF2 // A0A1S3KXH3 // A0A1S3RSH0 // A0A1S5RRP6 // A0A1S5RRP5 // I6NQY8 // B5XAY7 // B5XCL0 // A0A1S3L1F9 // A0A1S3KQE0 // B5XAD3 // B5XCQ1 // B5X6M9 // A0A1…
GO:0048037	MF	cofactor binding	15	606	2.47525	507	65384	0.775419	3.19214	0.00012	0.0016	// B5XBV2 // Q2A665 // C0PUP1 // B5X3K2 // B5XE59 // C0PUF3 // B5X1C6 // B5X1V6 // B5X0X6 // B5X423 // B5X3C0 // C0H9U3 // B5X0U9 // B5DGS2 // C0PU29	// O93460 // A0A1S3MSE8 // A0A1S3SXI5 // A0A1S3NF93 // B5X1C1 // A0A1S3NW86 // B5X1C6 // A0A1S3R5W1 // B5XE25 // A0A1S3RU03 // A0A1S3MIZ7 // A0A1S3QYA4 // A0A1S3T1H9 // A0A1S3MQR5 // C0H948 // A0A1S3NJZ8 // A0A1S3RMI3 // A0A1S3SUT7 // A0A1S3QH30 // A0A1S3SUT0 // A0A1S3L993 // A0A1S3SB25 // A0A1S3NJT5 // A0A1S3LI09 // A0A1S3STI9 // A0A1S3QF15 // A0A1S3QF14 // A0A1S3N6J2 // B5X205 // A0A1S3RCR5 // …
GO:0050662	MF	coenzyme binding	10	606	1.65017	343	65384	0.524593	3.14561	0.0017	0.02	// Q2A665 // C0PUP1 // B5X3K2 // B5XE59 // B5XBV2 // B5X3C0 // B5X0X6 // C0H9U3 // B5X0U9 // B5DGS2	// O93460 // A0A1S3SXI5 // A0A1S3NF93 // A0A1S3MRU2 // B5XE25 // A0A1S3MIZ7 // A0A1S3QYA4 // A0A1S3T1H9 // A0A1S3MQR5 // A0A1S3QMV6 // A0A1S3RMI3 // A0A1S3SUT7 // A0A1S3RTA3 // A0A1S3SUT0 // A0A1S3NJT5 // A0A1S3STI9 // A0A1S3QF14 // A0A1S3NY48 // A0A1S3RCR5 // B5X3K2 // A0A1S3NPU7 // A0A1S3MCZ8 // B5X0X6 // B5X0X2 // A0A1S3MVD4 // A0A1S3P282 // A0A1S3NFT8 // A0A1S3RFV9 // A0A1S3SII5 // A0A1S3N555…
GO:0005525	MF	GTP binding	40	606	6.60066	1399	65384	2.13967	3.0849	1.9e-09	1.2e-07	// B5X373 // B5XG74 // A7KJD9 // B5XE81 // B9ENL7 // B5DG90 // C0HBL4 // B5X0U5 // B5X4F0 // B5XGF8 // B5DGE8 // B5X3W0 // B5X499 // C0H9C3 // C0HBD9 // Q0PHC9 // B5X2S5 // B5X3Q1 // B9EN30 // C0H808 // B5X3H7 // C0H944 // C0HBS1 // B9EMH1 // C0PU76 // B5XEM8 // Q9PSX2 // B5X6L3 // C0HA50 // B5XET7 // B5X122 // B5X127 // B9ELU2 // B5XFE9 // C0HAL2 // Q2ERI0 // B5X2M3 // B5DH01 // B5DH02 // C0HAT5	// B5X445 // A0A1S3RCM3 // B5X110 // A0A1S3P0J6 // A0A1S2X4J4 // A0A1S3QG27 // A0A1S3MP07 // A0A1S3MP02 // A0A1S3LME8 // A0A1S3S8M8 // A0A1S3PA01 // B9ELV2 // B9ELV5 // A0A1S3L4V2 // A0A1S3SDN9 // B5X0Q2 // B5X0Q1 // A0A1S3LKQ5 // A0A1S3QCH6 // A0A1S3KJB3 // A0A1S3KJB8 // A0A1S3PPY1 // A0A1S3QTW7 // A0A1S3LAU2 // A0A1S3MYY2 // A0A1S3S186 // A0A1S3PVD9 // A0A1S3NS98 // A0A1S3LI97 // A0A1S3SSF6 // …
GO:0015077	MF	monovalent inorganic cation transmembrane transporter activity	10	606	1.65017	353	65384	0.539887	3.0565	0.002	0.024	// P68529 // B5DGC9 // B5X3C7 // B5DG78 // C0H9X1 // B5RI36 // B5X6S0 // B5RI88 // B5X1Y1 // B5X195	// B5X7S2 // B5X597 // A0A1S3KXH3 // A0A1S5RRP6 // A0A1S5RRP5 // M4VHK7 // B5X5K8 // A0A1S3LGZ3 // B5X161 // A0A1S3PEX4 // A0A1S3RSI7 // U5Y4W0 // A0A1S3RSI3 // B5XDQ0 // A0A1S3ME36 // B5DH26 // A0A1S3SBX1 // B5X6K1 // A0A1S3Q2G5 // C0H9X1 // A0A1S3STN0 // A0A1S3QRU8 // A0A1S3RMR2 // A0A1S3RQN1 // B5RI87 // B5XAD3 // B5XFL8 // B5RI88 // A0A1S3R8A6 // B5X9X1 // B9EMJ7 // B5DGC9 // A0A1S3P1H8 // A0…
GO:0032561	MF	guanyl ribonucleotide binding	40	606	6.60066	1420	65384	2.17179	3.03928	2.9e-09	1.6e-07	// B5X373 // B5XG74 // A7KJD9 // B5XE81 // B9ENL7 // B5DG90 // C0HBL4 // B5X0U5 // B5X4F0 // B5XGF8 // B5DGE8 // B5X3W0 // B5X499 // C0H9C3 // C0HBD9 // Q0PHC9 // B5X2S5 // B5X3Q1 // B9EN30 // C0H808 // B5X3H7 // C0H944 // C0HBS1 // B9EMH1 // C0PU76 // B5XEM8 // Q9PSX2 // B5X6L3 // C0HA50 // B5XET7 // B5X122 // B5X127 // B9ELU2 // B5XFE9 // C0HAL2 // Q2ERI0 // B5X2M3 // B5DH01 // B5DH02 // C0HAT5	// B5X445 // A0A1S3RCM3 // B5X110 // A0A1S3P0J6 // A0A1S2X4J4 // A0A1S3QG27 // A0A1S3MP07 // A0A1S3MP02 // A0A1S3LME8 // A0A1S3S8M8 // A0A1S3PA01 // B9ELV2 // B9ELV5 // A0A1S3L4V2 // A0A1S3SDN9 // B5X0Q2 // B5X0Q1 // A0A1S3LKQ5 // A0A1S3N3P8 // A0A1S3QCH6 // A0A1S3N1V1 // A0A1S3KJB3 // A0A1S3KJB8 // A0A1S3PPY1 // A0A1S3S973 // A0A1S3QTW7 // A0A1S3LAU2 // A0A1S3MYY2 // A0A1S3S186 // A0A1S3PVD9 // …
GO:0019001	MF	guanyl nucleotide binding	40	606	6.60066	1426	65384	2.18096	3.02649	3.3e-09	1.6e-07	// B5X373 // B5XG74 // A7KJD9 // B5XE81 // B9ENL7 // B5DG90 // C0HBL4 // B5X0U5 // B5X4F0 // B5XGF8 // B5DGE8 // B5X3W0 // B5X499 // C0H9C3 // C0HBD9 // Q0PHC9 // B5X2S5 // B5X3Q1 // B9EN30 // C0H808 // B5X3H7 // C0H944 // C0HBS1 // B9EMH1 // C0PU76 // B5XEM8 // Q9PSX2 // B5X6L3 // C0HA50 // B5XET7 // B5X122 // B5X127 // B9ELU2 // B5XFE9 // C0HAL2 // Q2ERI0 // B5X2M3 // B5DH01 // B5DH02 // C0HAT5	// B5X445 // A0A1S3RCM3 // B5X110 // A0A1S3P0J6 // A0A1S2X4J4 // A0A1S3QG27 // A0A1S3MP07 // A0A1S3MP02 // A0A1S3LME8 // A0A1S3S8M8 // A0A1S3PA01 // B9ELV2 // B9ELV5 // A0A1S3L4V2 // A0A1S3SDN9 // B5X0Q2 // B5X0Q1 // A0A1S3LKQ5 // A0A1S3N3P8 // A0A1S3QCH6 // A0A1S3N1V1 // A0A1S3KJB3 // A0A1S3KJB8 // A0A1S3PPY1 // A0A1S3S973 // A0A1S3QTW7 // A0A1S3LAU2 // A0A1S3MYY2 // A0A1S3S186 // A0A1S3PVD9 // …
GO:0004175	MF	endopeptidase activity	25	606	4.12541	920	65384	1.40707	2.93191	3.9e-06	9.6e-05	// C0H9M1 // B5X9F8 // B5X9D0 // B5DGG1 // B5XCL4 // B5DGJ1 // B5XFB9 // B5XD66 // B5DFV6 // B5XFH8 // B5DGU4 // B5X1B9 // B5X6N3 // C0H9F2 // B5RI58 // B5DGU5 // B5DG53 // C0HAB5 // C0H856 // C0HBI8 // B5XGP5 // B5DG91 // B5XGI9 // B5XAG6 // B5X2P5	// C0H9M1 // B5XG11 // A0A1S3RL48 // B5XAV2 // A0A1S3Q8S2 // A0A1S3KJY8 // A0A1S3NDY2 // A0A1S3NLU7 // A0A1S3QHF2 // C0HAZ4 // A0A1S3R5W6 // A0A1S3S653 // B5XC96 // A0A1S3KTE1 // B5X1J1 // A0A1S3NQV8 // B5XA59 // A0A1S3QYA3 // A0A1S3R4F1 // A0A1S3R4F2 // B5XGF5 // B5XA50 // A0A1S3PDQ4 // A0A1S3R642 // A0A1S3LHD5 // A0A1S3PB56 // A0A1S3RYP7 // A0A1S3QWR8 // B5XFW6 // A0A1S3MSB5 // A0A1S3M7M9 // A0…
GO:0008233	MF	peptidase activity	40	606	6.60066	1518	65384	2.32167	2.84307	1.7e-08	6.9e-07	// C0H9M1 // C0HAC7 // B5X8M1 // B5X9F8 // B5X9D0 // B5X2P5 // B5DGG1 // B5XCL4 // B5RI58 // B5XFB9 // B5XD66 // B5X4D9 // B5DFV6 // C0H9C5 // B5XFH8 // B5DGU4 // B5X435 // B5X5I0 // B5X4K2 // B5X1B9 // C0PUQ5 // B5X6N3 // B5X304 // C0H9F2 // B5DGJ1 // B5RI70 // B5DGU5 // B9EPR5 // C0HAB5 // C0H856 // B5X4T6 // C0HBI8 // B5XGP5 // B5X1P3 // B5DG91 // B5XGI9 // B5XAG6 // B9EPF8 // B5DG36 // B5DG53	// A0A1S3QDX0 // A0A1S3NDY2 // A0A1S3SDN0 // A0A1S3N5L0 // A0A1S3PPW3 // A0A1S3NKG1 // A0A1S3MSB5 // A0A1S3LM38 // A0A1S3KJY8 // C0H9F6 // A0A1S3QF17 // C0HB88 // C0H9F2 // A0A1S3NU57 // A0A1S3N3F1 // A0A1S3M106 // A0A1S3M104 // A0A1S3S978 // A0A1S3R152 // A0A1S3L294 // C0HAC7 // A0A1S3NLL6 // A0A1S3N344 // A0A1S3M076 // A0A1S3LHY7 // A0A1S3PYW4 // A0A1S3R578 // B5X2B5 // A0A1S3MGU3 // A0A1S3QX38…
GO:0070011	MF	peptidase activity, acting on L-amino acid peptides	34	606	5.61056	1410	65384	2.15649	2.60171	1.3e-06	3.8e-05	// C0H9M1 // B5X9F8 // B5X9D0 // B5X2P5 // B5DGG1 // B5XCL4 // B5RI58 // B5XFB9 // B5XD66 // B5X4D9 // B5DFV6 // B5XFH8 // B9EPR5 // B5X435 // B5X4K2 // B5X1B9 // C0PUQ5 // B5X6N3 // B5X304 // C0H9F2 // B5DGJ1 // B5RI70 // B5DGU5 // B5DGU4 // C0HAB5 // C0H856 // B5X4T6 // C0HBI8 // B5XGP5 // B5X1P3 // B5DG91 // B5XGI9 // B5XAG6 // B5DG53	// A0A1S3NDY2 // A0A1S3N5L0 // A0A1S3PPW3 // A0A1S3NKG1 // A0A1S3MSB5 // A0A1S3LM38 // A0A1S3QF17 // C0HB88 // C0H9F2 // A0A1S3S7S0 // A0A1S3N3F1 // A0A1S3M106 // A0A1S3M104 // A0A1S3S978 // A0A1S3R152 // A0A1S3L294 // A0A1S3NLL6 // A0A1S3N344 // A0A1S3M076 // A0A1S3LHY7 // A0A1S3PYW4 // A0A1S3R578 // B5X2B5 // A0A1S3MGU3 // A0A1S3QX38 // A0A1S3PHK1 // A0A1S3MHE5 // A0A1S3NHZ5 // A0A1S3PNC4 // A0…
GO:0016491	MF	oxidoreductase activity	43	606	7.09571	1815	65384	2.77591	2.55618	1e-07	3.3e-06	// C0PUP1 // B5X6M7 // B5X9Q1 // B5XFZ2 // B5X3E6 // B5X9L4 // B5X0U9 // Q7T1N7 // B5XG99 // B5X0S9 // C0HAI2 // B5X5Q6 // C0HB51 // C0H868 // C0H820 // Q7ZZK9 // Q7ZZK8 // B5X3U4 // B5RI88 // Q2A665 // A0A0G3B776 // Q3ZLR1 // B5XGY1 // B5X9C6 // C0HA51 // B5X4R5 // B5X8H5 // C0H8W3 // C0H9U3 // B5X3C0 // B5DGS2 // B5XAM9 // C0H976 // C0PU77 // B5X485 // B5X3K2 // B5DGB9 // B5DFX5 // B5X0X6 // C0…	// B5X447 // B5XF85 // B5X119 // A0A1S3QL55 // B5X9J3 // A0A1S3LME1 // A0A1S3N5L8 // A0A1S3QCH2 // A0A1S3LVB7 // A0A1S3R081 // A0A1S3P5E2 // A0A1S3KJB2 // A0A1S3PBL0 // A0A1S3RR12 // A0A1S3M109 // A0A1S3T3E6 // A1X3Q8 // A1X3Q9 // A1X3Q1 // A1X3Q2 // A1X3Q3 // A1X3Q4 // A1X3Q7 // A0A1S3LYC5 // A0A1S3R9B0 // A0A1S3LN29 // A0A1S3L9T0 // A0A1S3KR39 // A0A1S3LAF4 // A0A1S3QDJ6 // A0A1S3S7L8 // A0A1S3…
GO:0003723	MF	RNA binding	47	606	7.75578	2413	65384	3.69051	2.10155	5.5e-06	0.00013	// C0H8T1 // B5X326 // B5DGV2 // B5X7I1 // C0H9Z3 // A7KIL2 // B5X1E2 // B5DGK9 // B5DGA8 // B5XFP5 // B5X173 // B9EPQ0 // B5DGI2 // C0H7G0 // B5XDR0 // B5X5W5 // B5X5S8 // B5XA36 // B5X4I2 // B5DG02 // B5DG42 // B5X6H9 // C0HAB7 // B5X1U2 // C0H8N3 // B9EP93 // B5DGY4 // B5X385 // B5X4A8 // B5DGQ0 // B5X300 // B5X7R3 // C0HA19 // B5X2T5 // B5X4V8 // B5X2Z5 // B5DG79 // B5XCI6 // B5X3Z4 // B5XA68…	// A0A1S3LUR5 // A0A1S3LK00 // A0A1S2X4J4 // A0A1S3NYQ1 // B5X448 // A0A1S3P6R5 // A0A1S3NYQ2 // A0A1S3LP47 // B9ELV7 // A0A1S3PRG6 // A0A1S3NTE2 // A0A1S3S5T6 // C0HBF7 // A0A1S3MZY9 // B9ENF4 // A0A1S3PC87 // A0A1S3KVL3 // A0A1S3S6J2 // B5X840 // A0A1S3R084 // A0A1S3NTK3 // A0A1S3KLR8 // A0A1S3QF11 // A0A1S3QPG8 // C0HB82 // A0A1S3M107 // A0A1S3LV04 // A0A1S3QKQ3 // A0A1S3RSI5 // A0A1S3LV08 // …
GO:0016462	MF	pyrophosphatase activity	48	606	7.92079	2618	65384	4.00404	1.9782	2e-05	0.00039	// B5X8M1 // A7KJD9 // B5X105 // B5X3C7 // B5XE81 // B9ENL7 // C0H9X1 // B5XG74 // C0HBL4 // B5X0U5 // B5X1Y1 // B5X4F0 // B5DGE8 // B5XET7 // B5X592 // B5X8C7 // C0HB50 // C0H9C3 // B5XGF6 // B5DG90 // C0HBD9 // Q0PHC9 // B5X2S5 // B9EN30 // C0H808 // B5DG42 // B5X3H7 // B9ELU2 // C0H944 // C0HBS1 // B9EMH1 // C0PU76 // B5DFY2 // Q9PSX2 // B5X6L3 // C0HA50 // B5XEM8 // A7KII8 // B5XAK9 // B5X127…	// B5X445 // A0A1S3P0J6 // A0A1S3SMX3 // A0A1S3LZC7 // A0A1S3SKN2 // A0A1S3LSB3 // A0A1S3PLW1 // A0A1S3R6Y0 // A0A1S3PWC6 // A0A1S3PA01 // A0A1S3L4V2 // B5X592 // A0A1S3QAD9 // B9ENF2 // B5X0Q5 // B5X0Q2 // B5X0Q1 // A0A1S3LKQ5 // A0A1S3SBN8 // A0A1S3KVL0 // A0A1S3SBN4 // A0A1S3LVB0 // A0A1S3LVB5 // A0A1S3SCL6 // A0A1S3S3L3 // A0A1S3SMX5 // C0PU83 // C0PU84 // B5X8F1 // A0A1S3KJB3 // A0A1S3N3F7 /…
GO:0016818	MF	hydrolase activity, acting on acid anhydrides, in phosphorus-containing anhydrides	48	606	7.92079	2626	65384	4.01627	1.97217	2.1e-05	0.0004	// B5X8M1 // A7KJD9 // B5X105 // B5X3C7 // B5XE81 // B9ENL7 // C0H9X1 // B5XG74 // C0HBL4 // B5X0U5 // B5X1Y1 // B5X4F0 // B5DGE8 // B5XET7 // B5X592 // B5X8C7 // C0HB50 // C0H9C3 // B5XGF6 // B5DG90 // C0HBD9 // Q0PHC9 // B5X2S5 // B9EN30 // C0H808 // B5DG42 // B5X3H7 // B9ELU2 // C0H944 // C0HBS1 // B9EMH1 // C0PU76 // B5DFY2 // Q9PSX2 // B5X6L3 // C0HA50 // B5XEM8 // A7KII8 // B5XAK9 // B5X127…	// B5X445 // A0A1S3P0J6 // A0A1S3SMX3 // A0A1S3LZC7 // A0A1S3SKN2 // A0A1S3LSB3 // A0A1S3PLW1 // A0A1S3R6Y0 // A0A1S3PWC6 // A0A1S3PA01 // A0A1S3L4V2 // B5X592 // A0A1S3QAD9 // B9ENF2 // B5X0Q5 // B5X0Q2 // B5X0Q1 // A0A1S3LKQ5 // A0A1S3RDI3 // A0A1S3SBN8 // A0A1S3KVL0 // A0A1S3SBN4 // A0A1S3LVB0 // A0A1S3LVB5 // A0A1S3SCL6 // A0A1S3S3L3 // A0A1S3SMX5 // C0PU83 // C0PU84 // B5X8F1 // A0A1S3KJB3 /…
GO:0016817	MF	hydrolase activity, acting on acid anhydrides	48	606	7.92079	2637	65384	4.0331	1.96395	2.4e-05	0.00042	// B5X8M1 // A7KJD9 // B5X105 // B5X3C7 // B5XE81 // B9ENL7 // C0H9X1 // B5XG74 // C0HBL4 // B5X0U5 // B5X1Y1 // B5X4F0 // B5DGE8 // B5XET7 // B5X592 // B5X8C7 // C0HB50 // C0H9C3 // B5XGF6 // B5DG90 // C0HBD9 // Q0PHC9 // B5X2S5 // B9EN30 // C0H808 // B5DG42 // B5X3H7 // B9ELU2 // C0H944 // C0HBS1 // B9EMH1 // C0PU76 // B5DFY2 // Q9PSX2 // B5X6L3 // C0HA50 // B5XEM8 // A7KII8 // B5XAK9 // B5X127…	// B5X445 // A0A1S3P0J6 // A0A1S3SMX3 // A0A1S3LZC7 // A0A1S3SKN2 // A0A1S3LSB3 // A0A1S3PLW1 // A0A1S3R6Y0 // A0A1S3PWC6 // A0A1S3PA01 // A0A1S3L4V2 // B5X592 // A0A1S3QAD9 // B9ENF2 // B5X0Q5 // B5X0Q2 // B5X0Q1 // A0A1S3LKQ5 // A0A1S3RDI3 // A0A1S3SBN8 // A0A1S3KVL0 // A0A1S3SBN4 // A0A1S3LVB0 // A0A1S3LVB5 // A0A1S3SCL6 // A0A1S3S3L3 // A0A1S3SMX5 // C0PU83 // C0PU84 // B5X8F1 // A0A1S3KJB3 /…
GO:0017111	MF	nucleoside-triphosphatase activity	45	606	7.42574	2545	65384	3.89239	1.90776	7.7e-05	0.0011	// B5X8M1 // A7KJD9 // B5X105 // B5X3C7 // B5XE81 // B9ENL7 // C0H9X1 // B5XG74 // C0HBL4 // B5X0U5 // B5X1Y1 // B5X4F0 // B5DGE8 // B5XET7 // B5X592 // C0HB50 // C0H9C3 // B5DG90 // C0HBD9 // Q0PHC9 // B5X2S5 // B9EN30 // C0H808 // B5DG42 // B5X3H7 // B9ELU2 // C0H944 // C0HBS1 // B9EMH1 // C0PU76 // B5DFY2 // Q9PSX2 // B5X6L3 // C0HA50 // B5XEM8 // A7KII8 // B5X127 // B5XE76 // B5XFE9 // B5XG89…	// B5X445 // A0A1S3P0J6 // A0A1S3SMX3 // A0A1S3LZC7 // A0A1S3SKN2 // A0A1S3LSB3 // A0A1S3PLW1 // A0A1S3R6Y0 // A0A1S3PA01 // A0A1S3L4V2 // B5X592 // A0A1S3QAD9 // B9ENF2 // B5X0Q5 // B5X0Q2 // B5X0Q1 // A0A1S3LKQ5 // A0A1S3SBN8 // A0A1S3KVL0 // A0A1S3SBN4 // A0A1S3LVB0 // A0A1S3LVB5 // A0A1S3SCL6 // A0A1S3S3L3 // C0PU83 // B5X8F1 // A0A1S3KJB3 // A0A1S3N3F7 // A0A1S3RDG0 // A0A1S3S055 // A0A1S3N3…
GO:0016787	MF	hydrolase activity	114	606	18.8119	6930	65384	10.5989	1.77489	7.6e-08	2.6e-06	// C0H9M1 // B9EPN0 // B5X209 // B5X3C7 // C0PUI9 // B9EMV3 // B5X4F0 // B5X592 // B5DG88 // B5XA56 // B5XGF6 // B9EPR5 // B5DG05 // C0HDF3 // A7KII8 // C0PUQ5 // B5XFE9 // B5X6L7 // B5X6L3 // C0H9F2 // B5RI70 // B5DGU5 // B5DGU4 // C0PU76 // B5RI58 // C0HBI8 // B5X1P3 // B5DG91 // B5DG90 // B5XAG6 // B9EPF8 // C0HAC7 // B5X2C7 // C0HAC4 // B5XE81 // B5X4Y9 // C0H9X1 // C0H9G2 // B5X1Y1 // B5X0S8…	// A0A1S3QDX0 // A0A1S3PLW1 // A0A1S3L4V2 // A0A1S3LVB9 // A0A1S3N7P9 // A0A1S3LVB5 // A0A1S3LQ95 // A0A1S3S3L3 // A0A1S3LM38 // C0H9F4 // C0H9F6 // A0A1S3KJB3 // B5X209 // A0A1S3NF00 // B5X8F9 // A0A1S3RDG7 // A0A1S3NK51 // A0A1S3RDG5 // A0A1S3MTH8 // A0A1S3RQ86 // A0A1S3T5G5 // A0A1S3NBN2 // A0A1S3QVM6 // A0A1S3RRG2 // A0A1S3L9T8 // A0A1S3M076 // A0A1S3MV29 // A0A1S3Q2N3 // A0A1S3QFR2 // A0A1S3…
GO:0000166	MF	nucleotide binding	119	606	19.637	7893	65384	12.0718	1.62669	2.3e-06	6.6e-05	// C0PUP1 // B5X1G4 // B5X3C0 // B5XBN1 // Q78BU2 // C0HAA0 // B5XD07 // B5X4F0 // B5XGF8 // C0HBF1 // C0H9E1 // B5DGC6 // A7KII8 // B5X397 // B5XFE9 // B5X6L3 // B5XE35 // B5X209 // C0HAB6 // C0PU76 // B5X2M8 // B5X3K2 // B5DG90 // B5X2M3 // B5X0X6 // C0HBA2 // B5X4N1 // B5X195 // B5RI28 // C0HAC7 // B5DGM5 // B9EMS3 // B5XE81 // B9ENL7 // C0H9X1 // B5X1Y0 // B5DGE8 // B5XET7 // B5X0S0 // B5X2S5…	// A0A1S3QDX7 // A0A1S3QDX5 // A0A1S3QG27 // A0A1S3PLW4 // A0A1S3PLW1 // A0A1S3S8M8 // A0A1S3S8M7 // A0A1S3NIH9 // A0A1S3L4V2 // A0A1S3RBU6 // C0HBF1 // A0A1S3RQS2 // A0A1S3L0F8 // A0A1S3LVB9 // A0A1S3LVB0 // A0A1S3LVB5 // A0A1S3PRU8 // A0A1S3LM35 // A0A1S3KJB3 // B5X209 // A0A1S3KJB8 // A0A1S3RDG0 // A0A1S3NK54 // A0A1S3PTI2 // A0A1S3NK51 // A0A1S3MTH8 // A0A1S3RKC8 // A0A1S3M8G5 // A0A1S3S186 /…
GO:0017076	MF	purine nucleotide binding	110	606	18.1518	7599	65384	11.6221	1.56183	2.4e-05	0.00042	// C0PUP1 // B5X1G4 // B5X3C0 // B5XBN1 // Q78BU2 // C0HAA0 // B5XD07 // B5X4F0 // B5XGF8 // C0HBF1 // C0H9E1 // B5DGC6 // A7KII8 // B5X397 // B5XFE9 // B5X6L3 // B5XE35 // B5X209 // C0HAB6 // C0PU76 // B5X2M8 // B5DG90 // B5X2M3 // B5X0X6 // B9EPF8 // B5X4N1 // B5X195 // B5RI28 // C0HAC7 // B5DGM5 // B9EMS3 // B5XE81 // B9ENL7 // C0H9X1 // B5X1Y0 // B5DGE8 // B5XET7 // B5X0S0 // B5X2S5 // C0HBA2…	// A0A1S3QDX7 // A0A1S3QDX5 // A0A1S3QG27 // A0A1S3PLW4 // A0A1S3PLW1 // A0A1S3S8M8 // A0A1S3S8M7 // A0A1S3NIH9 // A0A1S3L4V2 // A0A1S3RBU6 // C0HBF1 // A0A1S3RQS2 // A0A1S3L0F8 // A0A1S3LVB9 // A0A1S3LVB0 // A0A1S3LVB5 // A0A1S3PRU8 // A0A1S3LM35 // A0A1S3KJB3 // B5X209 // A0A1S3KJB8 // A0A1S3RDG0 // A0A1S3NK54 // A0A1S3PTI2 // A0A1S3NK51 // A0A1S3MTH8 // A0A1S3RKC8 // A0A1S3M8G5 // A0A1S3S186 /…
GO:0003824	MF	catalytic activity	257	606	42.4092	17965	65384	27.4761	1.54349	8.1e-09	3.6e-07	// C0H9M1 // C0PUP1 // B9EPN0 // C0H9M4 // B5X115 // C0H7J1 // B5X3C7 // B5X291 // B5XBZ7 // B5X1C6 // B5XBN1 // B5RIB0 // B5XB51 // B5X209 // C0HAA0 // B5XD07 // B5X4F0 // B5XG99 // B5X592 // B5DG88 // C0HAI2 // B9EPT4 // B5XA56 // B5X911 // B5X6M7 // B5XGF6 // B9EPR5 // B5DG05 // C0HDF3 // A7KII8 // B9EMV3 // C0H820 // B5DGL3 // A0A0G3B776 // Q3ZLR1 // C0PUQ5 // B5XFE9 // C0H9N4 // B5X6L3 // B5…	// A0A1S3QDX4 // A0A1S3NPT8 // A0A1S3R0H5 // A0A1S3QDX0 // A0A1S3QG23 // A0A1S3PLW1 // A0A1S3S8M7 // A0A1S3L5T3 // A0A1S3S8M2 // A0A1S3L4V2 // A0A1S3RBU6 // C0HBF0 // A0A1S3KXH0 // A0A1S3RBU0 // A0A1S3RBU8 // A0A1S3LVB9 // A0A1S3KRM2 // B9EME1 // B5X6F5 // A0A1S3N7P9 // A0A1S3LQ90 // A0A1S3LQ97 // A0A1S3LQ95 // A0A1S3S3L3 // A0A1S3SSK6 // A0A1S3LM38 // A0A1S3PRU0 // A0A1S3QL55 // A0A1S3QNW3 // A0…
GO:0032555	MF	purine ribonucleotide binding	106	606	17.4917	7485	65384	11.4478	1.52796	6.9e-05	0.0011	// B5X1G4 // B5XBN1 // Q78BU2 // C0HAA0 // B5XD07 // B5X4F0 // B5XGF8 // C0HBF1 // C0H9E1 // B5DGC6 // A7KII8 // B5X397 // B5XFE9 // B5X6L3 // B5XE35 // B5X209 // C0HAB6 // C0PU76 // B5X2M8 // B5DG90 // B5X2M3 // B9EPF8 // B5X4N1 // B5X195 // B5RI28 // C0HAC7 // B5DGM5 // B9EMS3 // B5XE81 // B9ENL7 // C0H9X1 // B5X1Y0 // B5DGE8 // B5XET7 // B5X0S0 // B5X2S5 // C0HBA2 // C0H944 // B5X3U6 // C0HBS1…	// A0A1S3QDX7 // A0A1S3QDX5 // A0A1S3QG27 // A0A1S3PLW4 // A0A1S3PLW1 // A0A1S3S8M8 // A0A1S3S8M7 // A0A1S3NIH9 // A0A1S3L4V2 // A0A1S3RBU6 // C0HBF1 // A0A1S3RQS2 // A0A1S3L0F8 // A0A1S3LVB9 // A0A1S3LVB0 // A0A1S3LVB5 // A0A1S3PRU8 // A0A1S3LM35 // A0A1S3KJB3 // B5X209 // A0A1S3KJB8 // A0A1S3RDG0 // A0A1S3NK54 // A0A1S3PTI2 // A0A1S3NK51 // A0A1S3MTH8 // A0A1S3RKC8 // A0A1S3M8G5 // A0A1S3S186 /…
GO:0032553	MF	ribonucleotide binding	106	606	17.4917	7485	65384	11.4478	1.52796	6.9e-05	0.0011	// B5X1G4 // B5XBN1 // Q78BU2 // C0HAA0 // B5XD07 // B5X4F0 // B5XGF8 // C0HBF1 // C0H9E1 // B5DGC6 // A7KII8 // B5X397 // B5XFE9 // B5X6L3 // B5XE35 // B5X209 // C0HAB6 // C0PU76 // B5X2M8 // B5DG90 // B5X2M3 // B9EPF8 // B5X4N1 // B5X195 // B5RI28 // C0HAC7 // B5DGM5 // B9EMS3 // B5XE81 // B9ENL7 // C0H9X1 // B5X1Y0 // B5DGE8 // B5XET7 // B5X0S0 // B5X2S5 // C0HBA2 // C0H944 // B5X3U6 // C0HBS1…	// A0A1S3QDX7 // A0A1S3QDX5 // A0A1S3QG27 // A0A1S3PLW4 // A0A1S3PLW1 // A0A1S3S8M8 // A0A1S3S8M7 // A0A1S3NIH9 // A0A1S3L4V2 // A0A1S3RBU6 // C0HBF1 // A0A1S3RQS2 // A0A1S3L0F8 // A0A1S3LVB9 // A0A1S3LVB0 // A0A1S3LVB5 // A0A1S3PRU8 // A0A1S3LM35 // A0A1S3KJB3 // B5X209 // A0A1S3KJB8 // A0A1S3RDG0 // A0A1S3NK54 // A0A1S3PTI2 // A0A1S3NK51 // A0A1S3MTH8 // A0A1S3RKC8 // A0A1S3M8G5 // A0A1S3S186 /…

## Sheet: SHK1.Propagation.all.GOs
GO_acc	term_type	Term	queryitem	querytotal	%query	refitem	reftotal	%reference	fold-enrichment	pvalue	FDR	entries	entries_ref
GO:0071346	BP	cellular response to interferon-gamma	5	636	0.786164	25	65384	0.0382357	20.561	4e-06	0.00018	// C0HBD9 // C7EY83 // B5X397 // B9ELD5 // B5DGU4	// B5X3E8 // C7EY83 // B5X2G0 // B5DGT6 // B5X134 // B5DGT5 // X2KK07 // C0HBD9 // B9UYM8 // B5X1W2 // B5X397 // B5X4X0 // B9ELD5 // B9EPV8 // A8SZH4 // B5XG08 // C0HAQ6 // C0H9N2 // C0PUF7 // B5DGU3 // B5DGU4 // A7LH49 // B5X619 // X2KN52 // B9EM93
GO:0034341	BP	response to interferon-gamma	5	636	0.786164	25	65384	0.0382357	20.561	4e-06	0.00018	// C0HBD9 // C7EY83 // B5X397 // B9ELD5 // B5DGU4	// B5X3E8 // C7EY83 // B5X2G0 // B5DGT6 // B5X134 // B5DGT5 // X2KK07 // C0HBD9 // B9UYM8 // B5X1W2 // B5X397 // B5X4X0 // B9ELD5 // B9EPV8 // A8SZH4 // B5XG08 // C0HAQ6 // C0H9N2 // C0PUF7 // B5DGU3 // B5DGU4 // A7LH49 // B5X619 // X2KN52 // B9EM93
GO:0071345	BP	cellular response to cytokine stimulus	5	636	0.786164	27	65384	0.0412945	19.038	6e-06	0.00025	// C0HBD9 // C7EY83 // B5X397 // B9ELD5 // B5DGU4	// B5X3E8 // C7EY83 // B5X2G0 // B5DGT6 // B5X134 // B5DGT5 // X2KK07 // C0HBD9 // B5XFU9 // B9UYM8 // B5X1W2 // Q29W12 // B5X397 // B5X4X0 // B9ELD5 // B9EPV8 // A8SZH4 // B5XG08 // C0HAQ6 // C0H9N2 // C0PUF7 // B5DGU3 // B5DGU4 // A7LH49 // B5X619 // X2KN52 // B9EM93
GO:0034097	BP	response to cytokine stimulus	5	636	0.786164	30	65384	0.0458828	17.1342	1e-05	0.00038	// C0HBD9 // C7EY83 // B5X397 // B9ELD5 // B5DGU4	// B5X3E8 // C7EY83 // B5X2G0 // B5DGT6 // B5X134 // B5DGT5 // X2KK07 // C0HBD9 // B5XFU9 // B9UYM8 // B5X1W2 // Q29W12 // B5X397 // B5X4X0 // B9ELD5 // B9EPV8 // A8SZH4 // B5XG08 // C0HAQ6 // C0H9N2 // C0PUF7 // B5DGU3 // B5DGU4 // A7LH49 // B5X619 // X2KN52 // B9EM93 // Q98992 // Q98990 // Q98991
GO:0006457	BP	protein folding	24	636	3.77358	191	65384	0.29212	12.9179	3.2e-19	2.4e-16	// U5KQ14 // Q9W6K6 // U5KR11 // B5DG64 // C0HBF1 // B5XDR0 // B9EMD3 // C0HBB4 // B9EMS3 // C0HAF8 // B9EPT4 // Q8UWF4 // Q0KFS6 // B5X4M2 // B5X1Z2 // B5XA06 // C0HA30 // C0PUU5 // C0HAB6 // B9EL76 // U5KQM7 // B5DG94 // B5RI17 // B5XGM5	// A0A1S3NS46 // A0A1S3PN43 // B5X9U4 // A0A1S3S062 // A0A1S3RRD2 // A0A1S3QPN8 // A0A1S3KWX9 // C0H9S8 // A0A1S3NA10 // A0A1S3MN98 // A0A1S3PTN7 // C0HBF1 // C0HBF0 // A0A1S3RBH6 // A0A1S3Q971 // B5XGN0 // A0A1S3L7N1 // A0A1S3SWX8 // A0A1S3NZP0 // A0A1S3Q7I9 // B9EPE9 // C0PU61 // B5XBF7 // B5X685 // B5X8F5 // B5X207 // A0A1S3T539 // A0A1S3S0C3 // C0HAB6 // A0A1S3MP94 // B5X5R4 // B5X2M8 // B5X7…
GO:0006213	BP	pyrimidine nucleoside metabolic process	5	636	0.786164	52	65384	0.0795302	9.8851	0.00016	0.0037	// B5X434 // B5DGC6 // B5X3F7 // B5XCD3 // B5XCJ8	// A0A1S3S795 // A0A1S3PAS6 // B5XE40 // A0A1S3KVZ9 // A0A1S3LGW9 // A0A1S3LI38 // A0A1S3R5N6 // A0A1S3Q4S4 // A0A1S3KW36 // A0A1S3PMN3 // A0A1S3QMQ1 // A0A1S3KJA5 // A0A1S3NWR5 // B9EPL6 // B5XAW0 // B5XCJ8 // A0A1S3KXC9 // B5X4W4 // B5XB15 // A0A1S3MG06 // B5DGC6 // B5XA37 // B5X434 // B5X2W8 // B5X3F7 // B5XE35 // B5XCD3 // A0A1S3SUT6 // O57560 // A0A1S3KLG4 // A0A1S3LCC2 // C0HBQ0 // A0A1S3SU…
GO:0034728	BP	nucleosome organization	7	636	1.10063	73	65384	0.111648	9.85802	7.9e-06	0.00032	// B5DGS1 // B9ELQ9 // B9ELD5 // B5DFV7 // C0H823 // P84408 // B5X9W2	// A0A1S3SIK8 // B9EPS5 // A0A1S3NKX2 // A0A1S3LLD4 // A0A1S3SCZ3 // A0A1S3PJ20 // B5X2G0 // A0A1S3MY65 // A0A1S3Q744 // A0A1S3P8H1 // A0A1S3PG66 // A0A1S3SIT2 // B9ELY7 // B5DFV7 // B9ELA2 // B5X351 // A0A1S3SU55 // B5DGT6 // P84408 // B5DGT5 // B9ENC7 // A0A1S3SU36 // A0A1S3SU11 // A0A1S3SU17 // A0A1S3PIB9 // A0A1S3M5S2 // A0A1S3PIB4 // A0A1S3RPW5 // A0A1S3KL41 // A0A1S3P5V9 // B9EN25 // A0A1S3…
GO:0009205	BP	purine ribonucleoside triphosphate metabolic process	11	636	1.72956	116	65384	0.177413	9.74875	2.5e-08	2.7e-06	// B5XCJ8 // B5DGM5 // B5DGC6 // B5DG78 // C0H9X1 // B5RI36 // B5XAD3 // B5XCA1 // B5XD97 // B5XCD3 // B5X195	// B5XGG0 // B5X161 // B5XDF0 // A0A1S3R5N6 // B5X5B0 // B5RIB1 // A0A1S3PZF2 // B5X597 // A0A1S3P9I9 // B5DGC9 // B5DGC6 // A0A1S3L1F9 // C0H715 // B5XD97 // B5X626 // A0A1S3SUT6 // M4VHK7 // W0LQS8 // B5XAW0 // B5X6L8 // E2JDJ1 // B5XE35 // A0A1S3P0X0 // A0A1S3SBG2 // A0A1S3LTE0 // A0A1S3SBG4 // A0A1S3R5J6 // B5XEN1 // Q9YGC0 // A0A1S3NYI0 // B5DH26 // B5X195 // A0A1S3KYH8 // B5DGM5 // B5DGM6 /…
GO:0009144	BP	purine nucleoside triphosphate metabolic process	11	636	1.72956	116	65384	0.177413	9.74875	2.5e-08	2.7e-06	// B5XCJ8 // B5DGM5 // B5DGC6 // B5DG78 // C0H9X1 // B5RI36 // B5XAD3 // B5XCA1 // B5XD97 // B5XCD3 // B5X195	// B5XGG0 // B5X161 // B5XDF0 // A0A1S3R5N6 // B5X5B0 // B5RIB1 // A0A1S3PZF2 // B5X597 // A0A1S3P9I9 // B5DGC9 // B5DGC6 // A0A1S3L1F9 // C0H715 // B5XD97 // B5X626 // A0A1S3SUT6 // M4VHK7 // W0LQS8 // B5XAW0 // B5X6L8 // E2JDJ1 // B5XE35 // A0A1S3P0X0 // A0A1S3SBG2 // A0A1S3LTE0 // A0A1S3SBG4 // A0A1S3R5J6 // B5XEN1 // Q9YGC0 // A0A1S3NYI0 // B5DH26 // B5X195 // A0A1S3KYH8 // B5DGM5 // B5DGM6 /…
GO:0046034	BP	ATP metabolic process	8	636	1.25786	89	65384	0.136119	9.2409	2.9e-06	0.00014	// B5DGM5 // B5DG78 // C0H9X1 // B5RI36 // B5XAD3 // B5XCA1 // B5XD97 // B5X195	// B5X161 // B5XDF0 // B5X5B0 // A0A1S3PZF2 // B5X597 // A0A1S3P9I9 // B5DGC9 // A0A1S3L1F9 // C0H715 // B5XD97 // B5X626 // M4VHK7 // W0LQS8 // B5X6L8 // E2JDJ1 // B5XGG0 // B5RIB1 // B5XEN1 // A0A1S3NYI0 // B5DH26 // B5X195 // A0A1S3KYH8 // B5DGM5 // B5DGM6 // C0H9X1 // B5X5F2 // B5X6S0 // B5XFD0 // B5X274 // B5XB37 // A0A1S3RQN1 // B5XAD3 // Q35920 // B5DGN1 // B5DGN2 // B5DGN3 // B5X9X1 // B5…
GO:0009199	BP	ribonucleoside triphosphate metabolic process	12	636	1.88679	134	65384	0.204943	9.20642	1.1e-08	1.5e-06	// B5XCJ8 // B5DGM5 // B5DGC6 // B5DG78 // C0H9X1 // B5X434 // B5RI36 // B5XAD3 // B5XCA1 // B5XD97 // B5XCD3 // B5X195	// A0A1S3S795 // A0A1S3PAS6 // A0A1S3LI38 // B5XGG0 // B5X161 // B5XDF0 // A0A1S3R5N6 // B5X5B0 // B5RIB1 // A0A1S3KJA5 // A0A1S3PZF2 // B5X597 // B5X4W4 // A0A1S3P9I9 // B5DGC9 // A0A1S3MG06 // B5DGC6 // A0A1S3L1F9 // C0H715 // B5XD97 // B5X626 // A0A1S3SUT6 // M4VHK7 // W0LQS8 // B5XAW0 // B5X6L8 // E2JDJ1 // B5XE35 // A0A1S3P0X0 // A0A1S3SBG2 // A0A1S3LTE0 // A0A1S3SBG4 // A0A1S3R5J6 // B5XEN1…
GO:0031497	BP	chromatin assembly	6	636	0.943396	69	65384	0.10553	8.93957	6.2e-05	0.0017	// C0H823 // B9ELQ9 // B9ELD5 // P84408 // B5DFV7 // B5DGS1	// A0A1S3SIK8 // B9EPS5 // A0A1S3NKX2 // A0A1S3LLD4 // A0A1S3PJ20 // B5X2G0 // A0A1S3MY65 // A0A1S3Q744 // A0A1S3P8H1 // A0A1S3PG66 // A0A1S3SIT2 // B9ELY7 // B5DFV7 // B9ELA2 // B5X351 // A0A1S3SU55 // B5DGT6 // P84408 // B5DGT5 // B9ENC7 // A0A1S3SU36 // A0A1S3SU11 // A0A1S3SU17 // A0A1S3PIB9 // A0A1S3M5S2 // A0A1S3PIB4 // A0A1S3RPW5 // A0A1S3KL41 // A0A1S3P5V9 // B9EN25 // A0A1S3NNT9 // B5DGS1…
GO:0006334	BP	nucleosome assembly	6	636	0.943396	69	65384	0.10553	8.93957	6.2e-05	0.0017	// C0H823 // B9ELQ9 // B9ELD5 // P84408 // B5DFV7 // B5DGS1	// A0A1S3SIK8 // B9EPS5 // A0A1S3NKX2 // A0A1S3LLD4 // A0A1S3PJ20 // B5X2G0 // A0A1S3MY65 // A0A1S3Q744 // A0A1S3P8H1 // A0A1S3PG66 // A0A1S3SIT2 // B9ELY7 // B5DFV7 // B9ELA2 // B5X351 // A0A1S3SU55 // B5DGT6 // P84408 // B5DGT5 // B9ENC7 // A0A1S3SU36 // A0A1S3SU11 // A0A1S3SU17 // A0A1S3PIB9 // A0A1S3M5S2 // A0A1S3PIB4 // A0A1S3RPW5 // A0A1S3KL41 // A0A1S3P5V9 // B9EN25 // A0A1S3NNT9 // B5DGS1…
GO:0009141	BP	nucleoside triphosphate metabolic process	12	636	1.88679	141	65384	0.215649	8.74936	2e-08	2.5e-06	// B5XCJ8 // B5DGM5 // B5DGC6 // B5DG78 // C0H9X1 // B5X434 // B5RI36 // B5XAD3 // B5XCA1 // B5XD97 // B5XCD3 // B5X195	// A0A1S3S795 // B5DGK5 // A0A1S3PAS6 // A0A1S3LI38 // B5XGG0 // B5X161 // B5XDF0 // A0A1S3R5N6 // B5X5B0 // B5RIB1 // A0A1S3KJA5 // A0A1S3PZF2 // B5X597 // B5X4W4 // A0A1S3P9I9 // B5DGC9 // A0A1S3MG06 // B5DGC6 // A0A1S3L1F9 // C0H715 // B5XD97 // B5X626 // A0A1S3SUT6 // M4VHK7 // W0LQS8 // B5XAW0 // B5X6L8 // E2JDJ1 // B5XE35 // A0A1S3P0X0 // A0A1S3SBG2 // A0A1S3LTE0 // A0A1S3SBG4 // A0A1S3R5J6…
GO:0006333	BP	chromatin assembly or disassembly	6	636	0.943396	72	65384	0.110119	8.56709	7.8e-05	0.0021	// C0H823 // B9ELQ9 // B9ELD5 // P84408 // B5DFV7 // B5DGS1	// A0A1S3SIK8 // B9EPS5 // A0A1S3NKX2 // A0A1S3LLD4 // A0A1S3PJ20 // B5X2G0 // A0A1S3MY65 // A0A1S3Q744 // A0A1S3P8H1 // A0A1S3PG66 // A0A1S3SIT2 // B9ELY7 // B5DFV7 // B9ELA2 // B5X351 // A0A1S3SU55 // B5DGT6 // P84408 // B5DGT5 // B9ENC7 // A0A1S3SU36 // A0A1S3SU11 // A0A1S3SU17 // A0A1S3PIB9 // A0A1S3M5S2 // A0A1S3PIB4 // A0A1S3RPW5 // A0A1S3KL41 // A0A1S3P5V9 // B5X3F6 // B9EN25 // A0A1S3NNT9…
GO:0009142	BP	nucleoside triphosphate biosynthetic process	9	636	1.41509	113	65384	0.172825	8.18801	2e-06	0.0001	// B5XCJ8 // B5DGM5 // B5DGC6 // B5DG78 // B5X434 // B5RI36 // B5XAD3 // B5XCD3 // B5X195	// A0A1S3S795 // A0A1S3PAS6 // A0A1S3LI38 // B5XGG0 // B5XDF0 // A0A1S3R5N6 // B5X5B0 // B5RIB1 // A0A1S3KJA5 // B5X597 // B5X4W4 // A0A1S3R5J6 // B5DGC9 // A0A1S3MG06 // B5DGC6 // C0H715 // B5X626 // A0A1S3SUT6 // M4VHK7 // W0LQS8 // B5XAW0 // B5X6L8 // E2JDJ1 // B5XE35 // A0A1S3P0X0 // A0A1S3SBG2 // A0A1S3SBG4 // B5XEN1 // C0H9B7 // A0A1S3NYI0 // B5DH26 // B5X195 // B5DGM5 // B5DGM6 // B5X5F2 /…
GO:0045454	BP	cell redox homeostasis	12	636	1.88679	155	65384	0.237061	7.9591	5.7e-08	5.4e-06	// D0QEL0 // A0A0G3B776 // C0PUP1 // C0HBF4 // B5X291 // B5X1H7 // B5X3C0 // B5X9L4 // C0PU58 // B5X5Q6 // B5X8H5 // B5X7X7	// B5XBV8 // B9ENN0 // C0PUP1 // B5X6M7 // B5X291 // A0A1S3RZE5 // B5X3C0 // A0A1S3PP45 // B5RIA7 // A0A1S3PX04 // B5XE28 // A0A1S3NZC9 // A0A1S3PAZ6 // A0A1S3QLV6 // A0A1S3LV10 // B5XAN1 // A0A1S3PZN5 // B5XFN6 // A0A1S3MF21 // A0A1S3QAU1 // B5XFD8 // A0A0G3BAW3 // B9EP13 // B5XFI4 // A0A0G3B776 // A0A1S3MEY7 // B9EPV5 // A0A1S3QQT5 // A0A1S3PBL0 // B5RIB0 // A0A1S3RT57 // B9ELH6 // B5XDK7 // A0…
GO:0009206	BP	purine ribonucleoside triphosphate biosynthetic process	7	636	1.10063	93	65384	0.142237	7.73801	3.9e-05	0.0011	// B5XCJ8 // B5DGC6 // B5DG78 // B5RI36 // B5XAD3 // B5XCD3 // B5X195	// B5XDF0 // A0A1S3R5N6 // B5X5B0 // B5RIB1 // B5X597 // A0A1S3R5J6 // B5DGC9 // B5DGC6 // C0H715 // B5X626 // A0A1S3SUT6 // M4VHK7 // W0LQS8 // B5XAW0 // B5X6L8 // E2JDJ1 // B5XE35 // B5XGG0 // A0A1S3SBG2 // A0A1S3SBG4 // B5XEN1 // A0A1S3P0X0 // A0A1S3NYI0 // B5DH26 // B5X195 // B5X5F2 // B5X6S0 // B5XB37 // A0A1S3RQN1 // B5XA37 // B5XAD3 // Q35920 // A0A1S3LCC2 // B5DGN1 // B5DGN2 // B5DGN3 // …
GO:0009145	BP	purine nucleoside triphosphate biosynthetic process	7	636	1.10063	93	65384	0.142237	7.73801	3.9e-05	0.0011	// B5XCJ8 // B5DGC6 // B5DG78 // B5RI36 // B5XAD3 // B5XCD3 // B5X195	// B5XDF0 // A0A1S3R5N6 // B5X5B0 // B5RIB1 // B5X597 // A0A1S3R5J6 // B5DGC9 // B5DGC6 // C0H715 // B5X626 // A0A1S3SUT6 // M4VHK7 // W0LQS8 // B5XAW0 // B5X6L8 // E2JDJ1 // B5XE35 // B5XGG0 // A0A1S3SBG2 // A0A1S3SBG4 // B5XEN1 // A0A1S3P0X0 // A0A1S3NYI0 // B5DH26 // B5X195 // B5X5F2 // B5X6S0 // B5XB37 // A0A1S3RQN1 // B5XA37 // B5XAD3 // Q35920 // A0A1S3LCC2 // B5DGN1 // B5DGN2 // B5DGN3 // …
GO:0009201	BP	ribonucleoside triphosphate biosynthetic process	8	636	1.25786	111	65384	0.169766	7.40937	1.5e-05	0.00049	// B5XCJ8 // B5DGC6 // B5DG78 // B5X434 // B5RI36 // B5XAD3 // B5XCD3 // B5X195	// A0A1S3S795 // A0A1S3PAS6 // A0A1S3LI38 // B5XGG0 // B5XDF0 // A0A1S3R5N6 // B5X5B0 // B5RIB1 // A0A1S3KJA5 // B5X597 // B5X4W4 // A0A1S3R5J6 // B5DGC9 // A0A1S3MG06 // B5DGC6 // C0H715 // B5X626 // A0A1S3SUT6 // M4VHK7 // W0LQS8 // B5XAW0 // B5X6L8 // E2JDJ1 // B5XE35 // A0A1S3P0X0 // A0A1S3SBG2 // A0A1S3SBG4 // B5XEN1 // C0H9B7 // A0A1S3NYI0 // B5DH26 // B5X195 // B5X5F2 // B5X6S0 // B5XB37 /…
GO:0006323	BP	DNA packaging	6	636	0.943396	88	65384	0.13459	7.00943	0.00024	0.0052	// C0H823 // B9ELQ9 // B9ELD5 // P84408 // B5DFV7 // B5DGS1	// A0A1S3N062 // A0A1S3MY44 // A0A1S3P8H1 // A0A1S3SIT2 // B5X351 // B5DGT6 // P84408 // B5DGT5 // A0A1S3SU36 // A0A1S3PIB9 // A0A1S3PIB4 // A0A1S3SGF7 // A0A1S3SGF8 // A0A1S3MGB8 // B9EPV8 // A0A1S3RN22 // A0A1S3SU29 // A0A1S3KMF4 // A0A1S3NNX3 // A0A1S3LER8 // A0A1S3KL37 // A0A1S3PIC6 // A0A1S3KL38 // A0A1S3PFL3 // A0A1S3PJ20 // A0A1S3PG66 // C0H9G7 // A0A1S3SU55 // A0A1S3RPW5 // A0A1S3LLR0 // …
GO:0009119	BP	ribonucleoside metabolic process	8	636	1.25786	121	65384	0.185061	6.79703	2.8e-05	0.00088	// B5XCJ8 // B5DGC6 // C0H9E7 // B5X434 // B5XCD3 // C0H8Q7 // B5XD88 // B5XBZ7	// A0A1S3S795 // A0A1S3RMY7 // A0A1S3PAS6 // A0A1S3LT56 // A0A1S3LI38 // B5X5J2 // A0A1S3R5N6 // A0A1S3MM17 // A0A1S3KJA5 // C0H8K5 // A0A1S3KZ43 // B5X4W4 // A0A1S3PWI0 // A0A1S3MG06 // B5DGC6 // A0A1S3KPP8 // A0A1S3SLG3 // C0H9E7 // B5XCD3 // A0A1S3SUT6 // B5XAW0 // C0HBQ0 // A0A1S3QS03 // B5XE35 // C0H8Q7 // A0A1S3SBG2 // A0A1S3SBG4 // A0A1S3P3G3 // C0H9B7 // A0A1S3SLF0 // B5XD88 // A0A1S3NDH8…
GO:0009150	BP	purine ribonucleotide metabolic process	12	636	1.88679	188	65384	0.287532	6.56202	4.6e-07	3.3e-05	// B5XCJ8 // B5DGM5 // B5DGC6 // B5DG78 // C0H9X1 // B5RI36 // B5XAD3 // B5XCA1 // B5XD97 // B5XCD3 // B5XBZ7 // B5X195	// A0A1S3MIB4 // A0A1S3PSZ6 // A0A1S3T6P8 // A0A1S3P9I9 // A0A1S2X0C2 // B5XGG0 // B5X161 // B5XBZ7 // B5XDF0 // A0A1S3R5N6 // A0A1S3MM17 // B5X5B0 // B5RIB1 // A0A1S3R6Y8 // A0A1S3PZF2 // B5X597 // A0A1S3MJE5 // P68529 // B5DGC9 // B5DGC6 // A0A1S3KPP8 // A0A1S3L1F9 // C0H715 // B5XD97 // B5X626 // A0A1S3SUT6 // M4VHK7 // A0A1S3LIL6 // W0LQS8 // A0A1S3MM09 // B5XAW0 // B5X6L8 // C0H8Y0 // A0A1S3…
GO:0030041	BP	actin filament polymerization	8	636	1.25786	130	65384	0.198825	6.32646	4.7e-05	0.0013	// B5X4T2 // B5X2M7 // B5XCW2 // B5X3R3 // B5DG25 // B5X4K0 // C0H8S8 // B5DG56	// A0A1S3L0N8 // B5X9U3 // A0A1S3LEU6 // C0HBN3 // C0PUI5 // C0HBN6 // A0A1S3REW2 // A0A1S3PES9 // A0A1S3L112 // B5XGN2 // B5X7J0 // A0A1S3L0K8 // A0A1S3PES7 // A0A1S3P463 // A0A1S3RG96 // A0A1S3PRY0 // A0A1S3RBG3 // B5X7L8 // A0A1S3RJ34 // B9ELH8 // A0A1S3QSA1 // A0A1S3RJ33 // A0A1S3LEE2 // A0A1S3N1N6 // B5X5R2 // A0A1S3LUZ9 // B5X2M7 // A0A1S3P6B3 // B5DGD5 // A0A1S3QR64 // A0A1S3RJ29 // A0A1S3…
GO:0045087	BP	innate immune response	9	636	1.41509	150	65384	0.229414	6.1683	2e-05	0.00063	// C7EY83 // B5X397 // B9ELD5 // C0HBD9 // S0F1A6 // F5B7Y3 // F5B7Y2 // B5DGU4 // A0A0F6QNL8	// A0A1S3QI20 // A0A1S3N082 // A0A1S3NBM1 // A0A1S3T2H8 // A0A1S3LAM7 // B5XE24 // Q1A3D7 // A0A1S3N9M0 // A0A1S3N9M2 // B5DGT6 // B5DGU3 // B5DGT5 // A0A1S3LV19 // B5XFU9 // A0A1S3MLL4 // B5DGU4 // A0A1S3LGL6 // A0A1S3M055 // Q9DD37 // Q29W12 // Q6XQG6 // B5X3D9 // B9EPV8 // A0A1S3Q1E8 // A0A1S3MDN9 // Q800Z5 // C0H9N2 // A0A1S3RFT8 // M4V2E4 // A0A1S3MHJ4 // A0A3G9EPZ0 // A0A1S3SEA0 // A0A1S3NR…
GO:0032271	BP	regulation of protein polymerization	6	636	0.943396	102	65384	0.156001	6.04735	0.00053	0.0099	// B5X4T2 // B5X2M7 // B5X3R3 // B5DG25 // C0H8S8 // B5DG56	// A0A1S3L0N8 // A0A1S3LEU6 // C0HBN3 // C0PUI5 // C0HBN6 // A0A1S3REW2 // A0A1S3PES9 // A0A1S3L112 // A0A1S3PES7 // A0A1S3P463 // A0A1S3RG96 // A0A1S3RBG3 // A0A1S3RJ34 // B9ELH8 // A0A1S3QSA1 // A0A1S3RJ33 // A0A1S3LEE2 // A0A1S3N1N6 // B5X5R2 // A0A1S3LUZ9 // B5X2M7 // A0A1S3P6B3 // A0A1S3QR64 // A0A1S3RJ29 // A0A1S3N6U5 // A0A1S3L0S3 // A0A1S3N4F3 // B5XDX4 // A0A1S3P1X7 // A0A1S3P6A2 // A0A1…
GO:0030833	BP	regulation of actin filament polymerization	6	636	0.943396	102	65384	0.156001	6.04735	0.00053	0.0099	// B5X4T2 // B5X2M7 // B5X3R3 // B5DG25 // C0H8S8 // B5DG56	// A0A1S3L0N8 // A0A1S3LEU6 // C0HBN3 // C0PUI5 // C0HBN6 // A0A1S3REW2 // A0A1S3PES9 // A0A1S3L112 // A0A1S3PES7 // A0A1S3P463 // A0A1S3RG96 // A0A1S3RBG3 // A0A1S3RJ34 // B9ELH8 // A0A1S3QSA1 // A0A1S3RJ33 // A0A1S3LEE2 // A0A1S3N1N6 // B5X5R2 // A0A1S3LUZ9 // B5X2M7 // A0A1S3P6B3 // A0A1S3QR64 // A0A1S3RJ29 // A0A1S3N6U5 // A0A1S3L0S3 // A0A1S3N4F3 // B5XDX4 // A0A1S3P1X7 // A0A1S3P6A2 // A0A1…
GO:0046164	BP	alcohol catabolic process	7	636	1.10063	120	65384	0.183531	5.99696	0.00019	0.0045	// B5DGL3 // B5X4B0 // Q98SJ9 // B5X3K2 // B9EM17 // B5DGQ7 // B5XE29	// B9EPN0 // C0H9M4 // A0A1S3LI37 // A0A1S3S1F2 // B5DGT9 // B5XB51 // A0A1S3LSB6 // B5XE29 // A0A1S3Q6S9 // B9EM22 // A0A1S3PFE0 // A0A1S3PGK8 // B5XGF1 // A0A1S3L341 // B5DGL3 // A0A1S3Q086 // B5X5Z9 // B5DGU0 // O73866 // B5X3H5 // B5X3K2 // A0A1S3PV75 // A0A1S3MIQ1 // B9EM17 // B5XDN9 // A0A1S3PYV6 // B5X1B5 // A0A1S3P282 // A0A1S3Q707 // A0A1S3MD74 // B5DGM7 // A0A1S3KRF0 // A0A1S3SS19 // A0…
GO:0009259	BP	ribonucleotide metabolic process	13	636	2.04403	225	65384	0.344121	5.93985	4.9e-07	3.4e-05	// B5XCJ8 // B5DGM5 // B5DGC6 // B5DG78 // C0H9X1 // B5X434 // B5RI36 // B5XAD3 // B5XCA1 // B5XD97 // B5XCD3 // B5XBZ7 // B5X195	// A0A1S3S795 // A0A1S3PSZ6 // A0A1S3T6P8 // A0A1S3P9I9 // A0A1S2X0C2 // A0A1S3LI38 // B5XGG0 // B5X161 // B5XBZ7 // B5XDF0 // A0A1S3R5N6 // A0A1S3MM17 // B5X5B0 // B5RIB1 // A0A1S3KJA5 // A0A1S3R6Y8 // A0A1S3PZF2 // B5X597 // A0A1S3MJE5 // A0A1S3P9N1 // B5X4W4 // P68529 // B5DGC9 // A0A1S3MG06 // B5DGC6 // A0A1S3KPP8 // A0A1S3L1F9 // C0H715 // A0A1S3MIB4 // B5XD97 // B5X626 // A0A1S3SUT6 // M4VH…
GO:0019320	BP	hexose catabolic process	6	636	0.943396	105	65384	0.16059	5.87457	0.00061	0.011	// B5DGL3 // B5X4B0 // B5X3K2 // B9EM17 // B5DGQ7 // B5XE29	// B9EPN0 // C0H9M4 // A0A1S3S1F2 // B5DGT9 // B5XB51 // A0A1S3LSB6 // B5XE29 // A0A1S3Q6S9 // B9EM22 // A0A1S3PFE0 // A0A1S3PGK8 // B5XGF1 // A0A1S3L341 // B5DGL3 // A0A1S3Q086 // B5X5Z9 // B5DGU0 // O73866 // B5X3H5 // B5X3K2 // A0A1S3PV75 // A0A1S3MIQ1 // B9EM17 // B5XDN9 // A0A1S3PYV6 // B5X1B5 // A0A1S3P282 // A0A1S3Q707 // B5DGM7 // A0A1S3KRF0 // A0A1S3SS19 // A0A1S3LBJ0 // B5XB10 // A0A1S3…
GO:0043254	BP	regulation of protein complex assembly	6	636	0.943396	106	65384	0.162119	5.81915	0.00065	0.012	// B5X4T2 // B5X2M7 // B5X3R3 // B5DG25 // C0H8S8 // B5DG56	// A0A1S3L0N8 // A0A1S3L865 // A0A1S3LEU6 // C0HBN3 // C0PUI5 // C0HBN6 // A0A1S3REW2 // A0A1S3PES9 // A0A1S3L112 // A0A1S3PES7 // A0A1S3P463 // A0A1S3RG96 // A0A1S3RBG3 // A0A1S3RJ34 // B9ELH8 // A0A1S3QSA1 // A0A1S3RJ33 // A0A1S3LEE2 // A0A1S3N1N6 // B5X5R2 // A0A1S3LUZ9 // B5X2M7 // A0A1S3P6B3 // A0A1S3QR64 // A0A1S3RJ29 // A0A1S3N6U5 // A0A1S3L0S3 // A0A1S3N4F3 // B5XDX4 // A0A1S3P1X7 // A0A1…
GO:0009152	BP	purine ribonucleotide biosynthetic process	10	636	1.57233	177	65384	0.270708	5.80819	1.2e-05	0.0004	// B5XCJ8 // B5DGM5 // B5DGC6 // B5DG78 // B5RI36 // B5XAD3 // B5XCA1 // B5XCD3 // B5XBZ7 // B5X195	// A0A1S3MIB4 // A0A1S3PSZ6 // A0A1S3T6P8 // A0A1S3P9I9 // A0A1S2X0C2 // B5XGG0 // B5XBZ7 // B5XDF0 // A0A1S3R5N6 // A0A1S3MM17 // B5X5B0 // B5RIB1 // A0A1S3R6Y8 // A0A1S3PZF2 // B5X597 // A0A1S3MJE5 // P68529 // B5DGC9 // B5DGC6 // A0A1S3KPP8 // C0H715 // B5X626 // A0A1S3SUT6 // M4VHK7 // A0A1S3LIL6 // W0LQS8 // A0A1S3MM09 // B5XAW0 // B5X6L8 // C0H8Y0 // A0A1S3LJF5 // E2JDJ1 // B5XE35 // A0A1S3…
GO:0009116	BP	nucleoside metabolic process	10	636	1.57233	177	65384	0.270708	5.80819	1.2e-05	0.0004	// B5XCJ8 // B5DGC6 // C0H9E7 // B5X434 // B5XCD3 // B5X3F7 // C0H8Q7 // B5XD88 // B5XBZ7 // B5XFK7	// A0A1S3NE69 // A0A1S3S795 // A0A1S3RMY7 // A0A1S3PAS6 // A0A1S3LT56 // A0A1S3LI38 // A0A1S3MP04 // C0H8Q7 // B5X5J2 // A0A1S3R5N6 // A0A1S3MM17 // A0A1S3KJA5 // A0A1S3Q5S5 // A0A1S3KZ43 // B5X4W4 // A0A1S3PWI0 // A0A1S3MG06 // B5DGC6 // A0A1S3KPP8 // A0A1S3Q916 // C0H9E7 // A0A1S3S3P9 // A0A1S3SZL9 // A0A1S3KUT9 // B5XAW0 // C0HBQ0 // A0A1S3KPI9 // A0A1S3KNR1 // B5XE35 // A0A1S3N978 // A0A1S3KV…
GO:0051258	BP	protein polymerization	8	636	1.25786	142	65384	0.217179	5.79183	8.8e-05	0.0022	// B5X4T2 // B5X2M7 // B5XCW2 // B5X3R3 // B5DG25 // B5X4K0 // C0H8S8 // B5DG56	// A0A1S3L0N8 // B5X9U3 // A0A1S3MLZ0 // A0A1S3LEU6 // A0A1S3RF10 // C0HBN3 // C0PUI5 // C0HBN6 // A0A1S3REW2 // A0A1S3PES9 // A0A1S3L112 // B5XGN2 // B5X7J0 // A0A1S3L0K8 // A0A1S3PES7 // A0A1S3P463 // A0A1S3RG96 // A0A1S3PRY0 // A0A1S3RBG3 // B5X7L8 // A0A1S3RJ34 // B9ELH8 // A0A1S3QSA1 // A0A1S3RJ33 // B9EML2 // A0A1S3LEE2 // A0A1S3N1N6 // B5X5R2 // A0A1S3LUZ9 // B5X2M7 // A0A1S3P6B3 // B5DGD5…
GO:0046365	BP	monosaccharide catabolic process	6	636	0.943396	108	65384	0.165178	5.71139	0.00071	0.012	// B5DGL3 // B5X4B0 // B5X3K2 // B9EM17 // B5DGQ7 // B5XE29	// B9EPN0 // C0H9M4 // A0A1S3S1F2 // B5DGT9 // B5XB51 // A0A1S3LSB6 // B5XE29 // A0A1S3Q6S9 // B9EM22 // A0A1S3PFE0 // A0A1S3PGK8 // B5XGF1 // A0A1S3L341 // B5DGL3 // A0A1S3Q086 // B5X5Z9 // B5DGU0 // O73866 // B5X3H5 // B5X3K2 // A0A1S3PV75 // A0A1S3MIQ1 // B9EM17 // B5XDN9 // A0A1S3PYV6 // B5X1B5 // A0A1S3P282 // A0A1S3Q707 // B5DGM7 // A0A1S3KRF0 // A0A1S3SS19 // A0A1S3LBJ0 // B5XB10 // A0A1S3…
GO:0032272	BP	negative regulation of protein polymerization	5	636	0.786164	90	65384	0.137648	5.71139	0.002	0.031	// B5X2M7 // B5X3R3 // B5DG25 // C0H8S8 // B5DG56	// A0A1S3L0N8 // A0A1S3LEU6 // C0HBN3 // C0PUI5 // C0HBN6 // A0A1S3REW2 // A0A1S3PES9 // A0A1S3L112 // A0A1S3PES7 // A0A1S3P463 // A0A1S3RG96 // A0A1S3RJ34 // B9ELH8 // A0A1S3QSA1 // A0A1S3RJ33 // A0A1S3LEE2 // A0A1S3N1N6 // B5X2M7 // A0A1S3P6B3 // A0A1S3QR64 // A0A1S3RJ29 // A0A1S3N6U5 // A0A1S3L0S3 // A0A1S3N4F3 // A0A1S3P1X7 // A0A1S3P6A2 // A0A1S3KMV4 // A0A1S3REQ1 // A0A1S3SD33 // A0A1S3SD32…
GO:0030837	BP	negative regulation of actin filament polymerization	5	636	0.786164	90	65384	0.137648	5.71139	0.002	0.031	// B5X2M7 // B5X3R3 // B5DG25 // C0H8S8 // B5DG56	// A0A1S3L0N8 // A0A1S3LEU6 // C0HBN3 // C0PUI5 // C0HBN6 // A0A1S3REW2 // A0A1S3PES9 // A0A1S3L112 // A0A1S3PES7 // A0A1S3P463 // A0A1S3RG96 // A0A1S3RJ34 // B9ELH8 // A0A1S3QSA1 // A0A1S3RJ33 // A0A1S3LEE2 // A0A1S3N1N6 // B5X2M7 // A0A1S3P6B3 // A0A1S3QR64 // A0A1S3RJ29 // A0A1S3N6U5 // A0A1S3L0S3 // A0A1S3N4F3 // A0A1S3P1X7 // A0A1S3P6A2 // A0A1S3KMV4 // A0A1S3REQ1 // A0A1S3SD33 // A0A1S3SD32…
GO:0071103	BP	DNA conformation change	6	636	0.943396	110	65384	0.168237	5.60755	0.00078	0.013	// C0H823 // B9ELQ9 // B9ELD5 // P84408 // B5DFV7 // B5DGS1	// A0A1S3LLD4 // A0A1S3N062 // A0A1S3Q079 // A0A1S3MY44 // A0A1S3Q077 // A0A1S3P8H1 // A0A1S3SIT2 // B5X351 // B5DGT6 // P84408 // B5DGT5 // A0A1S3SU36 // A0A1S3KN29 // A0A1S3PIB9 // A0A1S3PIB4 // A0A1S3SGF7 // A0A1S3SGF8 // A0A1S3MGB8 // B9EPV8 // A0A1S3RN22 // A0A1S3SU29 // A0A1S3KMF4 // A0A1S3NNX3 // A0A1S3LER8 // A0A1S3KL37 // A0A1S3M4R9 // A0A1S3PIC6 // A0A1S3KL38 // A0A1S3PFL3 // A0A1S3KJX7…
GO:0042398	BP	cellular amino acid derivative biosynthetic process	5	636	0.786164	93	65384	0.142237	5.52715	0.0023	0.035	// B5X0S0 // B5X2J4 // B5X248 // B5XD88 // B5DGP1	// A0A1S3RMY7 // B5DFT9 // A0A1S3PF23 // C0H8K5 // A0A1S3KZ43 // C0HAI7 // A0A1S3KL23 // A0A1S3PS60 // A0A1S3KYD5 // A0A1S3KYD2 // B5X6F1 // A0A1S3RWX3 // C0PU89 // C0H9N1 // A0A1S3NMG5 // A0A1S3LMB2 // B5X2T1 // A0A1S3M748 // C0H8B9 // A0A1S3P3S3 // A0A1S3S7E9 // A0A1S3P3S6 // B5XD88 // A0A1S3M9E6 // A0A1S3NMY0 // B5DGG5 // A0A1S3KY97 // B5X175 // A0A1S3R2S5 // A0A1S3KZI0 // B5X0S0 // A0A1S3L8G8…
GO:0065004	BP	protein-DNA complex assembly	6	636	0.943396	112	65384	0.171296	5.50741	0.00086	0.015	// C0H823 // B9ELQ9 // B9ELD5 // P84408 // B5DFV7 // B5DGS1	// A0A1S3LLD4 // A0A1S3RWH3 // A0A1S3P8H1 // A0A1S3SIT2 // B5X351 // B5DGT6 // P84408 // B5DGT5 // A0A1S3SU36 // A0A1S3PIB9 // A0A1S3RJB7 // A0A1S3PIB4 // A0A1S3MGB8 // B9EPV8 // A0A1S3SU29 // A0A1S3LER8 // A0A1S3KL37 // B5XC29 // A0A1S3PIC6 // A0A1S3Q0V4 // A0A1S3Q0M0 // A0A1S3PFL3 // B5XD83 // A0A1S3MBZ4 // B5X9Z1 // A0A1S3KJX7 // A0A1S3LWT9 // A0A1S3PG66 // A0A1S3KV15 // A0A1S3PPA5 // A0A1S3SU…
GO:0044275	BP	cellular carbohydrate catabolic process	7	636	1.10063	131	65384	0.200355	5.4934	0.00033	0.0069	// B5DGL3 // B5X4B0 // Q98SJ9 // B5X3K2 // B9EM17 // B5DGQ7 // B5XE29	// B9EPN0 // C0H9M4 // A0A1S3LI37 // A0A1S3S1F2 // B5DGT9 // B5XB51 // A0A1S3LSB6 // B5XE29 // A0A1S3Q6S9 // B9EM22 // A0A1S3PFE0 // A0A1S3PGK8 // B5XGF1 // A0A1S3L341 // B5DGL3 // A0A1S3Q086 // Q91461 // B5X5Z9 // B5DGU0 // O73866 // B5X3H5 // B5X3K2 // A0A1S3PV75 // A0A1S3MIQ1 // B9EM17 // B5XDN9 // A0A1S3PYV6 // B5X1B5 // A0A1S3P282 // A0A1S3Q707 // A0A1S3MD74 // B5DGM7 // A0A1S3LS71 // A0A1S3…
GO:0006412	BP	translation	45	636	7.07547	845	65384	1.29237	5.47482	5.3e-19	2.7e-16	// B5XCP6 // C0H7H1 // B9ELK0 // B5DGV2 // B5DGV3 // B5X7I1 // B5DGX5 // A7KIL2 // B5DGX3 // B5X8X3 // B5DGX1 // B5X771 // B5RI41 // B5X0W4 // B5DGG8 // B9ENH4 // C0H7G0 // B5X5S8 // B5XG35 // C0H907 // C0H7M0 // B5DG42 // B5DGK7 // B5X7R3 // C0H7C2 // B5XDA1 // B5X668 // C0H7I9 // B5DGY4 // B5DGW8 // B5XF07 // B5XDA7 // B5DGV7 // B5DGK9 // B5X9T1 // B5X340 // B5DGJ6 // B5DGJ7 // B5DGB4 // C0PU33…	// B9EPU0 // A0A1S3Q570 // B9EQB9 // C0H7J7 // A0A1S3QPN9 // A0A1S3N6S7 // A0A1S3RR63 // B5X8V1 // B5XC98 // B5RI65 // B5X9J1 // B5X7S7 // A0A1S3Q8P8 // B5XC93 // C0H8C7 // A0A1S3PT98 // B5X599 // A0A1S3SLS0 // B5X7J4 // B5X610 // C0H7M1 // C0H7M0 // B5DG02 // B5DG01 // B5X841 // B5X840 // C0H7M9 // A0A1S3MUA7 // A0A1S3MSB2 // B5XCH8 // B5DGL2 // B5DGL6 // A0A1S3R084 // B5DGL8 // B5X369 // A0A1S3…
GO:0031333	BP	negative regulation of protein complex assembly	5	636	0.786164	94	65384	0.143766	5.46835	0.0024	0.036	// B5X2M7 // B5X3R3 // B5DG25 // C0H8S8 // B5DG56	// A0A1S3L0N8 // A0A1S3L865 // A0A1S3LEU6 // C0HBN3 // C0PUI5 // C0HBN6 // A0A1S3REW2 // A0A1S3PES9 // A0A1S3L112 // A0A1S3PES7 // A0A1S3P463 // A0A1S3RG96 // A0A1S3RJ34 // B9ELH8 // A0A1S3QSA1 // A0A1S3RJ33 // A0A1S3LEE2 // A0A1S3N1N6 // B5X2M7 // A0A1S3P6B3 // A0A1S3QR64 // A0A1S3RJ29 // A0A1S3N6U5 // A0A1S3L0S3 // A0A1S3N4F3 // A0A1S3P1X7 // A0A1S3P6A2 // A0A1S3KMV4 // A0A1S3REQ1 // A0A1S3L883…
GO:0009260	BP	ribonucleotide biosynthetic process	11	636	1.72956	214	65384	0.327297	5.28437	1.1e-05	0.00038	// B5XCJ8 // B5DGM5 // B5DGC6 // B5DG78 // B5X434 // B5RI36 // B5XAD3 // B5XCA1 // B5XCD3 // B5XBZ7 // B5X195	// A0A1S3S795 // A0A1S3PSZ6 // A0A1S3T6P8 // A0A1S3P9I9 // A0A1S2X0C2 // A0A1S3LI38 // B5XGG0 // B5XBZ7 // B5XDF0 // A0A1S3R5N6 // A0A1S3MM17 // B5X5B0 // B5RIB1 // A0A1S3KJA5 // A0A1S3R6Y8 // A0A1S3PZF2 // B5X597 // A0A1S3MJE5 // A0A1S3P9N1 // B5X4W4 // P68529 // B5DGC9 // A0A1S3MG06 // B5DGC6 // A0A1S3KPP8 // C0H715 // A0A1S3MIB4 // B5X626 // A0A1S3SUT6 // M4VHK7 // A0A1S3LIL6 // W0LQS8 // A0A1…
GO:0006310	BP	DNA recombination	7	636	1.10063	144	65384	0.220237	4.99747	0.00059	0.011	// C0HBQ6 // F4YUS6 // B5RI68 // B5X2S3 // B5X3S9 // F4YUR6 // B5X3S2	// A0A1S3LN09 // A0A1S3NR57 // B9EQJ6 // B5RI68 // A0A1S3RMA6 // A0A1S3RMA1 // A0A1S3SJT3 // B9EQ56 // A0A1S3M4Q2 // A0A1S3T3D4 // A0A1S3LYD5 // A0A1S2X086 // B5X3S2 // B5X2S3 // C0HBQ6 // A0A1S3KYW6 // A0A1S3SHQ7 // A0A1S3RB58 // A0A1S3T0G7 // A0A1S3RQE9 // A0A1S3NDY3 // A0A1S3P5B7 // A0A1S3MUH5 // A0A1S3NI64 // A0A1S3MB62 // B5X4V6 // A0A1S3S7T1 // A0A1S3MYJ8 // A0A1S3T0F2 // A0A1S3RVN8 // A7KI…
GO:0002684	BP	positive regulation of immune system process	5	636	0.786164	103	65384	0.157531	4.99054	0.0035	0.05	// F5B7Y3 // F5B7Y2 // A0A0F6QNL8 // B9ENV6 // C0HBS7	// A0A1S3L2E5 // A0A1S3N082 // A0A1S3NBM1 // A0A1S3SG59 // C0H8R1 // A0A1S3N9M0 // A0A1S3Q273 // C7S7A5 // C0HB93 // A0A1S3MZN8 // A0A1S3N5V0 // A0A1S3QFT1 // A0A1S3P197 // B5X1S7 // A0A1S3LGZ0 // A0A1S3MDN9 // A0A1S3LZ65 // A0A1S3MXG6 // A0A1S3RFT8 // M4V2E4 // A0A1S3Q3R5 // A0A1S3SEA0 // A0A1S3NRY2 // A0A1S3R6I0 // A0A1S3P1J7 // D1GEL4 // B5X3K9 // A0A1S3SJ38 // A0A1S3LLG5 // A0A1S3N5U3 // A0A1…
GO:0071310	BP	cellular response to organic substance	8	636	1.25786	168	65384	0.256944	4.89548	0.00028	0.0059	// B9ELD5 // C7EY83 // B5X397 // C0HB24 // C0HBD9 // B5X329 // B5DGU4 // B5X7X4	// B5X6M2 // A0A1S3PCS7 // A0A1S3M504 // B5XBV3 // A0A1S3RXI0 // A0A1S3PPP8 // A0A1S3QIT0 // A0A1S3KT79 // B5DGT6 // B5DGT5 // A0A1S3L229 // A0A1S3PZW8 // C0HB24 // A0A1S3RXA4 // A0A1S3QGI5 // A0A1S3NDR3 // A0A1S3RW79 // A0A1S3RW75 // Q29W12 // A0A1S3RW71 // B5X397 // A0A1S3M574 // A0A1S3NNP2 // B9EPV8 // A0A1S3LHN5 // A0A1S3RBG3 // A0A1S3RXH6 // C0H9N2 // A0A1S3QHI6 // A0A1S3P7S7 // A0A1S3R3W2 /…
GO:0008064	BP	regulation of actin polymerization or depolymerization	6	636	0.943396	127	65384	0.194237	4.85693	0.0016	0.026	// B5X4T2 // B5X2M7 // B5X3R3 // B5DG25 // C0H8S8 // B5DG56	// A0A1S3L0N8 // A0A1S3P571 // A0A1S3LEU6 // C0HBN3 // C0PUI5 // C0HBN6 // A0A1S3REW2 // A0A1S3PYF7 // A0A1S3PYF5 // A0A1S3LAT8 // A0A1S3L112 // A0A1S3R029 // B9EPC3 // A0A1S3PES7 // A0A1S3P463 // A0A1S3RG96 // A0A1S3RBG3 // A0A1S3QNW0 // A0A1S3QWT7 // A0A1S3RJ34 // B9ELH8 // A0A1S3QSA1 // A0A1S3RJ33 // A0A1S3LEE2 // A0A1S3N1N6 // A0A1S3PYG2 // B5X5R2 // A0A1S3LUZ9 // B5X2M7 // A0A1S3P6B3 // A0A1…
GO:0030832	BP	regulation of actin filament length	6	636	0.943396	127	65384	0.194237	4.85693	0.0016	0.026	// B5X4T2 // B5X2M7 // B5X3R3 // B5DG25 // C0H8S8 // B5DG56	// A0A1S3L0N8 // A0A1S3P571 // A0A1S3LEU6 // C0HBN3 // C0PUI5 // C0HBN6 // A0A1S3REW2 // A0A1S3PYF7 // A0A1S3PYF5 // A0A1S3LAT8 // A0A1S3L112 // A0A1S3R029 // B9EPC3 // A0A1S3PES7 // A0A1S3P463 // A0A1S3RG96 // A0A1S3RBG3 // A0A1S3QNW0 // A0A1S3QWT7 // A0A1S3RJ34 // B9ELH8 // A0A1S3QSA1 // A0A1S3RJ33 // A0A1S3LEE2 // A0A1S3N1N6 // A0A1S3PYG2 // B5X5R2 // A0A1S3LUZ9 // B5X2M7 // A0A1S3P6B3 // A0A1…
GO:0032535	BP	regulation of cellular component size	8	636	1.25786	174	65384	0.26612	4.72667	0.00035	0.0073	// V9Q6E2 // B5X4T2 // C0H8S8 // B5X2M7 // B5X3R3 // B5DG25 // B5X7X4 // B5DG56	// A0A1S3MDG8 // A0A1S3L0N8 // A0A1S3P571 // A0A1S3PDE8 // A0A1S3LEU6 // C0HBN3 // C0PUI5 // C0HBN6 // A0A1S3REW2 // A0A1S3PYF7 // A0A1S3PYF5 // A0A1S3NJ69 // A0A1S3LAT8 // A0A1S3L112 // A0A1S3LAV2 // A0A1S3R029 // B9EPC3 // A0A1S3QBD7 // A0A1S3PES7 // A0A1S3NKA6 // A0A1S3P463 // A0A1S3RG96 // A0A1S3RBG3 // A0A1S3QNW0 // A0A1S3QWT7 // A0A1S3RJ34 // B9ELH8 // A0A1S3QSA1 // A0A1S3RJ33 // A0A1S3L1T5…
GO:0044087	BP	regulation of cellular component biogenesis	6	636	0.943396	136	65384	0.208002	4.53552	0.0023	0.035	// B5X4T2 // B5X2M7 // B5X3R3 // B5DG25 // C0H8S8 // B5DG56	// A0A1S3L0N8 // A0A1S3LLJ7 // A0A1S3L865 // A0A1S3LEU6 // C0HBN3 // C0PUI5 // C0HBN6 // A0A1S3REW2 // A0A1S3T6X0 // A0A1S3QU50 // A0A1S3PES9 // A0A1S3L112 // A0A1S3L0K8 // A0A1S3PES7 // A0A1S3NUX5 // A0A1S3P463 // A0A1S3RG96 // A0A1S3RBG3 // A0A1S3RJ34 // B9ELH8 // A0A1S3QSA1 // A0A1S3NHP7 // A0A1S3RJ33 // A0A1S3LEE2 // A0A1S3N1N6 // B5X5R2 // A0A1S3LUZ9 // B5X2M7 // A0A1S3P6B3 // A0A1S3KXA3 // …
GO:0016052	BP	carbohydrate catabolic process	7	636	1.10063	160	65384	0.244708	4.49772	0.0011	0.018	// B5DGL3 // B5X4B0 // Q98SJ9 // B5X3K2 // B9EM17 // B5DGQ7 // B5XE29	// B9EPN0 // C0H9M4 // A0A1S3LI37 // A0A1S3QJL1 // B5XET9 // A0A1S3S1F2 // B5DGT9 // B5XCN8 // B5XB51 // A0A1S3LSB6 // B5XE29 // A0A1S3Q6S9 // B9EM22 // A0A1S3PFE0 // A0A1S3PGK8 // B5XGF1 // B5XAN4 // A0A1S3RUT8 // A0A1S3L341 // B5XFA3 // A0A1S3PU66 // A0A1S3RB55 // A0A1S3Q086 // Q91461 // B5X5Z9 // B5DGU0 // O73866 // B5X3H5 // B5X3K2 // A0A1S3PV75 // A0A1S3NPG7 // A0A1S3MIQ1 // B9EM17 // B5XDN9…
GO:0006163	BP	purine nucleotide metabolic process	12	636	1.88679	288	65384	0.440475	4.28354	3.5e-05	0.0011	// B5XCJ8 // B5DGM5 // B5DGC6 // B5DG78 // C0H9X1 // B5RI36 // B5XAD3 // B5XCA1 // B5XD97 // B5XCD3 // B5XBZ7 // B5X195	// A0A1S3SRU1 // A0A1S3SRU0 // A0A1S3PSZ6 // A0A1S3T6P8 // A0A1S3P9I9 // A0A1S2X0C2 // A0A1S3SDV2 // A0A1S3NUH3 // C0H976 // B5X161 // A0A1S3NLU5 // A0A1S3NLU6 // B5XDF0 // A0A1S3PJU2 // A0A1S3MM17 // A0A1S3SEE0 // B5X5B0 // B5RIB1 // B5XBZ7 // A0A1S3Q7D0 // A0A1S3R6Y8 // A0A1S3PZF2 // B5X597 // A0A1S3S940 // A0A1S3MJE5 // A0A1S3PV85 // P68529 // B5DGC9 // B5DGC6 // A0A1S3Q0L4 // A0A1S3KPP8 // C0…
GO:0044282	BP	small molecule catabolic process	11	636	1.72956	267	65384	0.408357	4.23541	8.1e-05	0.0021	// C0PU77 // B5DGL3 // B5X919 // B5X4B0 // Q98SJ9 // B5X3K2 // B9EM17 // B5XFJ9 // B5DGQ7 // C0H935 // B5XE29	// A0A1S3LDS5 // B5X3N8 // A0A1S3N0A3 // B9EPN0 // C0H9M4 // A0A1S3LI37 // A0A1S3NNV0 // A0A1S3SST8 // A0A1S3SN28 // A0A1S3MSE8 // A0A1S3M2M9 // A0A1S3S1F2 // A0A1S3M2R8 // B5DGT9 // B5XB51 // A0A1S3LSB6 // B5DGU0 // A0A1S3M3S2 // A0A1S3N0K4 // I0J1J3 // B5XE29 // B5X6U8 // A0A1S3QB34 // B5X919 // B9EM22 // C0HB12 // A0A1S3L8R0 // A0A1S3PGR8 // B5XGF1 // C0HAI9 // A0A1S3QEL3 // A0A1S3MDL2 // M4V2…
GO:0006520	BP	cellular amino acid metabolic process	16	636	2.51572	393	65384	0.601064	4.18545	2.7e-06	0.00013	// B5XCP6 // B5X434 // B5X919 // C0HA51 // B5X1P3 // B5X340 // B5X4T8 // B5XFJ9 // B5X1V6 // C0H907 // Q7ZZK9 // Q7ZZK8 // B5XD88 // B5X205 // B5X319 // Q7ZZL0	// A0A1S3MSE8 // A0A1S3M2M9 // A0A1S3N0K4 // A0A1S3P7Z9 // A0A1S3KL23 // A0A1S3N2K1 // A0A1S3ME44 // B5XGF7 // A0A1S3KPC7 // A0A1S3MUA7 // C0PU89 // A0A1S3P376 // A0A1S3KJB2 // A0A1S3QF15 // A0A1S3LER1 // A0A1S3RR12 // B5X205 // A0A1S3KRL1 // C0HBA2 // A0A1S3MQY3 // A0A1S3L4C4 // A0A1S3L4C0 // A0A1S3KK23 // A0A1S3PLH0 // A0A1S3NIY9 // A0A1S3KIN9 // A0A1S3PG83 // C0HB36 // A0A1S3RQN3 // A0A1S3L8G8…
GO:0051129	BP	negative regulation of cellular component organization	6	636	0.943396	148	65384	0.226355	4.16777	0.0035	0.05	// B5X2M7 // B5X3R3 // B5DG25 // B9ENV6 // C0H8S8 // B5DG56	// A0A1S3L0N8 // A0A1S3P571 // B5XBV0 // A0A1S3RYX9 // A0A1S3L865 // A0A1S3LEU6 // C0HBN3 // C0PUI5 // C0HBN6 // A0A1S3REW2 // A0A1S3QU50 // A0A1S3KSP7 // A0A1S3LAT8 // A0A1S3L112 // A0A1S3QN01 // B5X7J3 // A0A1S3QIM3 // A0A1S3PES7 // A0A1S3P463 // A0A1S3RG96 // B9ENG8 // A0A1S3NSW4 // A0A1S3RJ34 // B9ELH8 // A0A1S3QSA1 // A0A1S3RJ33 // A0A1S3LEE2 // A0A1S3N1N6 // A0A1S3KSV5 // B5X2M7 // A0A1S3P6…
GO:0010033	BP	response to organic substance	11	636	1.72956	272	65384	0.416004	4.15756	9.5e-05	0.0023	// B9ELD5 // C7EY83 // B5X397 // C0HB24 // C0HBD9 // Q9W6K6 // Q5J7P6 // B5X329 // B5DGU4 // B5X7X4 // A0A0F6QNL8	// E2JDK0 // B5X6M2 // A0A1S3PCS7 // A0A1S3NKW2 // B5XBV3 // A0A1S3RXI0 // A0A1S3RMK1 // A0A1S3PPP8 // A0A1S3MWD4 // A0A1S3MYY9 // Q7T2G8 // B5DGT6 // B5DGT5 // C0HBD9 // A0A1S3N647 // A0A1S3L229 // A0A1S3SBF1 // A0A1S3PZW8 // A0A1S3REW4 // A0A1S3RXA4 // A0A1S3M504 // A0A1S3RW79 // A0A1S3NDR3 // A0A1S3NKG6 // A0A1S3RNW8 // A0A1S3RKE4 // A0A1S3RW75 // Q29W12 // A0A1S3RW71 // B5X397 // A0A1S3M574 /…
GO:0006519	BP	cellular amino acid and derivative metabolic process	21	636	3.30189	521	65384	0.796831	4.14377	9.9e-08	8.9e-06	// B5XCP6 // B5X434 // B5X919 // B5X340 // Q7ZZK8 // B5X1P3 // B5X0S0 // B5X248 // B5X4T8 // C0HA51 // B5XFJ9 // B5X1V6 // C0H907 // Q7ZZK9 // B5DGP1 // B5X3C0 // B5X2J4 // B5X205 // B5XD88 // B5X319 // Q7ZZL0	// A0A1S3MSE8 // A0A1S3NM74 // A0A1S3M2M9 // B5X1C6 // A0A1S3N0K4 // A0A1S3NUU7 // A0A1S3P7Z9 // A0A1S3KL23 // A0A1S3L8R0 // A0A1S3N2K1 // A0A1S3ME44 // B5XGF7 // A0A1S3SYI0 // A0A1S3MUA7 // A0A1S3RWX3 // C0PU89 // A0A1S3P376 // A0A1S3KJB2 // A0A1S3QF15 // A0A1S3LER1 // A0A1S3RR12 // B5X205 // B5X2T1 // A0A1S3KRL1 // C0HBA2 // A0A1S3QTW1 // A0A1S3MQY3 // A0A1S3L4C4 // A0A1S3L4C0 // A0A1S3KY97 // …
GO:0008154	BP	actin polymerization or depolymerization	9	636	1.41509	229	65384	0.350239	4.04037	0.00049	0.0094	// B5X4T2 // B5X2M7 // B5XCW2 // B5X3R3 // B5DG25 // B9ELH2 // B5X4K0 // C0H8S8 // B5DG56	// A0A1S3L0N8 // B5X9U3 // A0A1S3Q9L8 // A0A1S3SMG0 // A0A1S3SMG2 // A0A1S3Q9L4 // A0A1S3MUQ2 // A0A1S3Q9L0 // A0A1S3MAZ4 // A0A1S3QX06 // A0A1S3LEU6 // A0A1S3LKB4 // C0HBN3 // A0A1S3P571 // C0PUI5 // C0HBN6 // A0A1S3REW2 // A0A1S3PYF7 // B5XCW2 // B5X8V4 // A0A1S3MQR3 // A0A1S3LAT8 // A0A1S3L112 // B5XGN2 // A0A1S3QTS8 // B5X7J0 // A0A1S3R029 // B9EPC3 // A0A1S3MBB0 // A0A1S3MUQ6 // A0A1S3PES7 /…
GO:0070887	BP	cellular response to chemical stimulus	10	636	1.57233	256	65384	0.391533	4.01582	0.00026	0.0055	// C0HBD9 // B9ELD5 // C7EY83 // B5X397 // C0HB24 // B5XFJ9 // Q6XPT2 // B5X329 // B5DGU4 // B5X7X4	// A0A1S3QDX6 // B5X6M2 // A0A1S3PCS7 // A0A1S3Q574 // A0A1S3M504 // B5XBV3 // A0A1S3RXI0 // A0A1S3PPP8 // A0A1S3QIT0 // A0A1S3KT79 // B5DGT6 // Q709D2 // B5DGT5 // Q4ZHV0 // Q7ZTG9 // A0A1S3L229 // A0A1S3PLS6 // A0A1S3PZW8 // B5XFU9 // A0A1S3RXA4 // A0A1S3N2K1 // Q6S736 // A0A1S3RW79 // A0A1S3NDR3 // A0A1S3RNW8 // B5X0Y0 // A0A1S3KKX8 // A0A1S3RW75 // A0A1S3RUC6 // Q29W12 // A0A1S3NMP5 // A0A1S3…
GO:0044106	BP	cellular amine metabolic process	17	636	2.67296	447	65384	0.683653	3.90981	3.3e-06	0.00015	// B5XCP6 // B5X434 // B5X919 // C0HA51 // B5X1P3 // B5X340 // B5X4T8 // B5XFJ9 // B5X1V6 // C0H907 // Q7ZZK9 // Q7ZZK8 // B5X2J4 // B5X205 // B5XD88 // B5X319 // Q7ZZL0	// A0A1S3MSE8 // A0A1S3M2M9 // A0A1S3N0K4 // A0A1S3NUU7 // A0A1S3P7Z9 // A0A1S3KL23 // A0A1S3N2K1 // A0A1S3ME44 // B5XGF7 // A0A1S3KPC7 // A0A1S3MUA7 // A0A1S3RWX3 // C0PU89 // A0A1S3P376 // A0A1S3KJB2 // A0A1S3QF15 // A0A1S3LER1 // A0A1S3RR12 // B5X205 // B5X2T1 // A0A1S3KRL1 // C0HBA2 // A0A1S3MQY3 // A0A1S3L4C4 // A0A1S3L4C0 // A0A1S3KY97 // A0A1S3KK23 // A0A1S3PLH0 // A0A1S3NIY9 // A0A1S3KIN9…
GO:0006575	BP	cellular amino acid derivative metabolic process	7	636	1.10063	187	65384	0.286003	3.84832	0.0026	0.039	// B5DGP1 // B5X0S0 // B5X248 // B5X3C0 // B5XFJ9 // B5XD88 // B5X2J4	// A0A1S3M1F1 // A0A1S3LDS5 // A0A1S3RMY7 // A0A1S3LSD9 // A0A1S3LT56 // B5DFT9 // A0A1S3MSE8 // A0A1S3M2M9 // B5X1C6 // A0A1S3KYD5 // A0A1S3NF13 // C0H8K5 // A0A1S3L087 // A0A1S3RSH9 // C0HAI7 // A0A1S3KL23 // A0A1S3L8R0 // A0A1S3PS60 // A0A1S3N2K1 // C0HAI9 // A0A1S3Q6S6 // A0A1S3QEL3 // A0A1S3P961 // A0A1S3PI05 // A0A1S3KYD2 // B5X6F1 // A0A1S3RWX3 // A0A1S3L601 // C0PU89 // A0A1S3L604 // C0H9…
GO:0006753	BP	nucleoside phosphate metabolic process	19	636	2.98742	513	65384	0.784596	3.80759	1.3e-06	7.1e-05	// B5XCJ8 // B5X434 // B5DG78 // B5DGM5 // B5DGC6 // B9EM17 // C0H9E7 // C0H9X1 // C0H9F4 // B5RI36 // B5XAD3 // B5XCA1 // B5XD97 // B5XFJ9 // B5XCD3 // B5XBZ7 // B5XFK7 // B5X195 // B5X215	// A0A1S3MSE8 // A0A1S3NT29 // A0A1S3NUH3 // A0A1S3NLU5 // A0A1S3NLU6 // A0A1S3Q5S5 // A0A1S3R6Y8 // A0A1S3PZF2 // B5X597 // A0A1S3N2K1 // B5X124 // A0A1S3PPW1 // A0A1S3RMI6 // A0A1S3KUT1 // A0A1S3SEE0 // A0A1S3SUT6 // M4VHK7 // A0A1S3LGZ3 // A0A1S3RN25 // A0A1S3LJF5 // A0A1S3QMQ1 // C0H9F4 // B5X161 // Q2EMR4 // B5RIB1 // B9EM17 // A0A1S3R2A6 // A0A1S3R5N6 // C0PU79 // A0A1S3P282 // A0A1S3MZF5 /…
GO:0009117	BP	nucleotide metabolic process	19	636	2.98742	513	65384	0.784596	3.80759	1.3e-06	7.1e-05	// B5XCJ8 // B5X434 // B5DG78 // B5DGM5 // B5DGC6 // B9EM17 // C0H9E7 // C0H9X1 // C0H9F4 // B5RI36 // B5XAD3 // B5XCA1 // B5XD97 // B5XFJ9 // B5XCD3 // B5XBZ7 // B5XFK7 // B5X195 // B5X215	// A0A1S3MSE8 // A0A1S3NT29 // A0A1S3NUH3 // A0A1S3NLU5 // A0A1S3NLU6 // A0A1S3Q5S5 // A0A1S3R6Y8 // A0A1S3PZF2 // B5X597 // A0A1S3N2K1 // B5X124 // A0A1S3PPW1 // A0A1S3RMI6 // A0A1S3KUT1 // A0A1S3SEE0 // A0A1S3SUT6 // M4VHK7 // A0A1S3LGZ3 // A0A1S3RN25 // A0A1S3LJF5 // A0A1S3QMQ1 // C0H9F4 // B5X161 // Q2EMR4 // B5RIB1 // B9EM17 // A0A1S3R2A6 // A0A1S3R5N6 // C0PU79 // A0A1S3P282 // A0A1S3MZF5 /…
GO:0006164	BP	purine nucleotide biosynthetic process	10	636	1.57233	273	65384	0.417533	3.76575	0.00042	0.0084	// B5XCJ8 // B5DGM5 // B5DGC6 // B5DG78 // B5RI36 // B5XAD3 // B5XCA1 // B5XCD3 // B5XBZ7 // B5X195	// A0A1S3SRU1 // A0A1S3SRU0 // A0A1S3PSZ6 // A0A1S3T6P8 // A0A1S3P9I9 // A0A1S2X0C2 // A0A1S3NUH3 // C0H976 // B5XGG0 // A0A1S3NLU5 // A0A1S3NLU6 // B5XDF0 // A0A1S3PJU2 // A0A1S3MM17 // B5X5B0 // B5RIB1 // B5XBZ7 // A0A1S3R6Y8 // A0A1S3PZF2 // B5X597 // A0A1S3S940 // A0A1S3MJE5 // A0A1S3PV85 // P68529 // B5DGC9 // B5DGC6 // A0A1S3Q0L4 // A0A1S3KPP8 // C0H9G2 // A0A1S3NZP4 // C0H715 // A0A1S3RMI6…
GO:0009165	BP	nucleotide biosynthetic process	14	636	2.20126	387	65384	0.591888	3.71905	3.9e-05	0.0011	// B5XCJ8 // B5XFJ9 // B5DGM5 // B5DGC6 // B5DG78 // B5X434 // B5RI36 // B5XAD3 // B5XCA1 // B5X215 // B5XCD3 // B5XBZ7 // B5XFK7 // B5X195	// A0A1S3MSE8 // A0A1S3NUH3 // A0A1S3NLU5 // A0A1S3NLU6 // A0A1S3R6Y8 // A0A1S3PZF2 // B5X597 // A0A1S3N2K1 // A0A1S3RMI6 // A0A1S3KUT1 // A0A1S3SUT6 // M4VHK7 // A0A1S3LGZ3 // A0A1S3RN25 // A0A1S3LJF5 // A0A1S3QMQ1 // Q2EMR4 // A0A1S3R2A6 // A0A1S3R5N6 // C0PU79 // A0A1S3MZF5 // A0A1S3R018 // B5DH26 // A0A1S3KIA7 // A0A1S3MCT3 // A0A1S3NZZ1 // A0A1S3M770 // A0A1S3SNP1 // A0A1S3RQN1 // A0A1S3SNP8…
GO:0055086	BP	nucleobase, nucleoside and nucleotide metabolic process	22	636	3.45912	612	65384	0.936009	3.69561	3.5e-07	2.8e-05	// B9EM17 // B5DGM5 // C0H9X1 // B5X215 // B5XCJ8 // B5XFJ9 // B5DGC6 // C0H9E7 // B5X434 // B5XAD3 // B5XD97 // B5XCD3 // C0H9F4 // B5RI36 // C0H8Q7 // B5X3F7 // B5DG78 // B5XCA1 // B5XD88 // B5XBZ7 // B5XFK7 // B5X195	// A0A1S3MSE8 // A0A1S3NT29 // A0A1S3NUH3 // A0A1S3MP04 // A0A1S3NLU5 // A0A1S3NLU6 // A0A1S3Q5S5 // A0A1S3R6Y8 // A0A1S3PZF2 // B5X597 // A0A1S3PWI0 // A0A1S3N2K1 // B5X124 // A0A1S3PPW1 // A0A1S3RMI6 // A0A1S3KUT1 // A0A1S3SEE0 // A0A1S3SUT6 // A0A1S3KUT9 // M4VHK7 // A0A1S3LGZ3 // A0A1S3RN25 // A0A1S3PG84 // A0A1S3LJF5 // A0A1S3QMQ1 // C0H9F4 // B5X161 // A0A1S3RQE7 // Q2EMR4 // B5RIB1 // A0A1…
GO:0019725	BP	cellular homeostasis	14	636	2.20126	408	65384	0.624006	3.52762	6.8e-05	0.0018	// D0QEL0 // A0A0G3B776 // C0PUP1 // C0HBF4 // B5X291 // B5X1H7 // B5X740 // B5X3C0 // B5X9L4 // C0PU58 // B5X5Q6 // B5X8H5 // C0PU56 // B5X7X7	// B5X291 // B5X292 // A0A1S3RZE5 // A0A1S3LSB6 // B5XE28 // A0A1S3PFE0 // A0A1S3P4P3 // A0A1S3N642 // A0A1S3R659 // A0A1S3QAD3 // A0A1S3Q9E3 // A0A1S3MF23 // A0A1S3MF21 // A0A1S3MNE5 // B5X847 // A0A1S3QBU6 // A0A1S3MS04 // A0A1S3PBL0 // A0A1S3QB03 // A0A1S3PZM8 // P49946 // P49947 // A0A1S3LB65 // B9EM15 // A0A1S3Q375 // A0A1S3L0Y0 // B5X4Y3 // B5XF30 // B5X9S5 // A0A1S3R9B0 // B5X6K7 // A0A1S3…
GO:0009308	BP	amine metabolic process	18	636	2.83019	532	65384	0.813655	3.47837	8.5e-06	0.00033	// B5XCP6 // B5X434 // B5X919 // C0HA51 // B5X1P3 // C0H9N4 // B5X340 // B5X4T8 // B5XFJ9 // B5X1V6 // C0H907 // Q7ZZK9 // Q7ZZK8 // B5X2J4 // B5X205 // B5XD88 // B5X319 // Q7ZZL0	// A0A1S3MSE8 // A0A1S3M2M9 // B5X1C6 // A0A1S3QKV6 // A0A1S3N0K4 // A0A1S3NUU7 // A0A1S3P7Z9 // A0A1S3KL23 // A0A1S3LED4 // A0A1S3N2K1 // A0A1S3ME44 // B5XGF7 // A0A1S3KPC7 // A0A1S3MUA7 // A0A1S3RWX3 // A0A1S3RB55 // A0A1S3P376 // A0A1S3KJB2 // A0A1S3QF15 // A0A1S3LER1 // A0A1S3RR12 // B5X205 // B5X2T1 // A0A1S3KRL1 // C0HBA2 // A0A1S3MQY3 // A0A1S3L4C4 // A0A1S3L4C0 // A0A1S3KY97 // A0A1S3KK23…
GO:0090066	BP	regulation of anatomical structure size	8	636	1.25786	245	65384	0.374709	3.3569	0.0031	0.046	// V9Q6E2 // B5X4T2 // C0H8S8 // B5X2M7 // B5X3R3 // B5DG25 // B5X7X4 // B5DG56	// A0A1S3QSA1 // Q9YGJ1 // A0A1S3P571 // A0A1S3NQ51 // A0A1S3Q792 // A0A1S3QVW9 // A0A1S3PDE8 // A0A1S3L0N8 // A0A1S3LEU6 // A0A1S3MIV0 // C0HBN3 // A0A1S3MDG8 // A0A1S3SKP3 // C0HBN6 // A0A1S3LME5 // A0A1S3SKP0 // A0A1S3REW2 // A0A1S3LZT7 // A0A1S3PYF7 // A0A1S3PYF5 // A0A1S3NH91 // A0A1S3NJ69 // A0A1S3PFE8 // A0A1S3NH96 // A0A1S3LAT8 // A0A1S3L112 // A0A1S3P6E7 // A0A1S3SLN3 // A0A1S3R029 // B9…
GO:0046483	BP	heterocycle metabolic process	19	636	2.98742	586	65384	0.896244	3.33327	8.8e-06	0.00033	// B5XCJ8 // B5XFJ9 // B5DGM5 // B5DGC6 // B5DG87 // B5DG78 // C0H9X1 // B5X434 // B5RI36 // B5XAD3 // B5XCA1 // B5XD97 // C0H8Q7 // B9ELA9 // B5XCD3 // B5XBZ7 // B5X3E6 // B5X3F7 // B5X195	// A0A1S3QDX4 // A0A1S3NUH3 // P80081 // A0A1S3MB97 // A0A1S3NLU5 // A0A1S3NLU6 // C0H9V7 // B5X4F2 // A0A1S3R6Y8 // A0A1S3PZF2 // B5X597 // A0A1S3N2K1 // A0A1S3RMI6 // A0A1S3MB92 // A0A1S3SUT6 // M4VHK7 // A0A1S3LGZ3 // A0A1S3P376 // A0A1S3RN25 // A0A1S3LJF5 // A0A1S3LI09 // A0A1S3SGM1 // A0A1S3KJB2 // B5X161 // A0A1S3RR12 // Q2EMR4 // B5X5R6 // A0A1S3KTP9 // A0A1S3R2A6 // A0A1S3R5N6 // A0A1S3T3…
GO:0043436	BP	oxoacid metabolic process	24	636	3.77358	742	65384	1.13483	3.32523	6.9e-07	4.2e-05	// B5XCP6 // B5X319 // B5X205 // B5XFJ9 // B5X919 // B5X434 // C0H907 // Q7ZZK9 // Q7ZZK8 // B5DGL3 // C0HA51 // B9EMU9 // B5X4R5 // C0H9U1 // B5X340 // C0H935 // B5XAM9 // C0PU77 // B5X1P3 // B5X4T8 // B5X1V6 // B5XD88 // Q7ZZL0 // B5X2K3	// A0A1S3MSE8 // A0A1S3MSE9 // B5X4R5 // A0A1S3RIQ4 // A0A1S3M2M9 // A0A1S3RM23 // B5XB51 // A0A1S3Q5S7 // A0A1S3N0K4 // A0A1S3L087 // C0H9M4 // A0A1S3P7Z9 // A0A1S3PLM1 // A0A1S3KL22 // A0A1S3KL23 // A0A1S3N2K1 // A0A1S3ME44 // C0H9P1 // B5XGF7 // A0A1S3RIX0 // A0A1S3KPC7 // A0A1S3MYK9 // A0A1S3RNL9 // A0A1S3MUA7 // A0A1S3MUA3 // B5DGL3 // C0PU89 // A0A1S3P376 // B9EMU9 // A0A1S3KJB2 // A0A1S3NW…
GO:0019752	BP	carboxylic acid metabolic process	24	636	3.77358	742	65384	1.13483	3.32523	6.9e-07	4.2e-05	// B5XCP6 // B5X319 // B5X205 // B5XFJ9 // B5X919 // B5X434 // C0H907 // Q7ZZK9 // Q7ZZK8 // B5DGL3 // C0HA51 // B9EMU9 // B5X4R5 // C0H9U1 // B5X340 // C0H935 // B5XAM9 // C0PU77 // B5X1P3 // B5X4T8 // B5X1V6 // B5XD88 // Q7ZZL0 // B5X2K3	// A0A1S3MSE8 // A0A1S3MSE9 // B5X4R5 // A0A1S3RIQ4 // A0A1S3M2M9 // A0A1S3RM23 // B5XB51 // A0A1S3Q5S7 // A0A1S3N0K4 // A0A1S3L087 // C0H9M4 // A0A1S3P7Z9 // A0A1S3PLM1 // A0A1S3KL22 // A0A1S3KL23 // A0A1S3N2K1 // A0A1S3ME44 // C0H9P1 // B5XGF7 // A0A1S3RIX0 // A0A1S3KPC7 // A0A1S3MYK9 // A0A1S3RNL9 // A0A1S3MUA7 // A0A1S3MUA3 // B5DGL3 // C0PU89 // A0A1S3P376 // B9EMU9 // A0A1S3KJB2 // A0A1S3NW…
GO:0006082	BP	organic acid metabolic process	24	636	3.77358	743	65384	1.13636	3.32075	7.1e-07	4.2e-05	// B5XCP6 // B5X319 // B5X205 // B5XFJ9 // B5X919 // B5X434 // C0H907 // Q7ZZK9 // Q7ZZK8 // B5DGL3 // C0HA51 // B9EMU9 // B5X4R5 // C0H9U1 // B5X340 // C0H935 // B5XAM9 // C0PU77 // B5X1P3 // B5X4T8 // B5X1V6 // B5XD88 // Q7ZZL0 // B5X2K3	// A0A1S3MSE8 // A0A1S3MSE9 // B5X4R5 // A0A1S3RIQ4 // A0A1S3M2M9 // A0A1S3RM23 // B5XB51 // A0A1S3Q5S7 // A0A1S3N0K4 // A0A1S3L087 // C0H9M4 // A0A1S3P7Z9 // A0A1S3PLM1 // A0A1S3KL22 // A0A1S3KL23 // A0A1S3N2K1 // A0A1S3ME44 // C0H9P1 // B5XGF7 // A0A1S3RIX0 // A0A1S3KPC7 // A0A1S3MYK9 // A0A1S3RNL9 // A0A1S3MUA7 // A0A1S3MUA3 // B5DGL3 // C0PU89 // A0A1S3P376 // B9EMU9 // A0A1S3KJB2 // A0A1S3NW…
GO:0006952	BP	defense response	12	636	1.88679	372	65384	0.568947	3.31629	0.00038	0.0077	// B5XA65 // C0HBS7 // C7EY83 // B5X397 // B9ELD5 // C0HBD9 // S0F1A6 // F5B7Y3 // F5B7Y2 // B5DGU4 // P84408 // A0A0F6QNL8	// A0A1S3T2H8 // B5XE24 // B5XE28 // A0A1S3KL22 // A0A1S3MM99 // A0A1S3R8T4 // B5X9E3 // A0A1S3QIM4 // B5X7J9 // B5X3D9 // A0A1S3R7G5 // A0A1S3L4Q7 // B9EQI8 // A0A1S3NF02 // A0A1S3SEA0 // A0A1S3SFG7 // A0A1S3SFG5 // B5X3K9 // A0A1S3R8S9 // S0F0N4 // A0A1S3SMV5 // B5X8A6 // A0A1S3QXA5 // A0A1S3QXA8 // A0A1S3SBW5 // A0A1S3MLL4 // A0A1S3QJ73 // A0A1S3KSE7 // C0HBS7 // A0A1S3R3U2 // A0A1S3QY33 // A0…
GO:0042180	BP	cellular ketone metabolic process	24	636	3.77358	771	65384	1.17919	3.20016	1.3e-06	7.1e-05	// B5XCP6 // B5X319 // B5X205 // B5XFJ9 // B5X919 // B5X434 // C0H907 // Q7ZZK9 // Q7ZZK8 // B5DGL3 // C0HA51 // B9EMU9 // B5X4R5 // C0H9U1 // B5X340 // C0H935 // B5XAM9 // C0PU77 // B5X1P3 // B5X4T8 // B5X1V6 // B5XD88 // Q7ZZL0 // B5X2K3	// A0A1S3MSE8 // A0A1S3MSE9 // B5X4R5 // A0A1S3RIQ4 // A0A1S3M2M9 // A0A1S3RM23 // B5XB51 // A0A1S3RTX1 // A0A1S3Q5S7 // A0A1S3N0K4 // A0A1S3L087 // C0H9M4 // A0A1S3P7Z9 // A0A1S3PLM1 // A0A1S3KL22 // A0A1S3KL23 // A0A1S3N2K1 // A0A1S3ME44 // C0H9P1 // B5XGF7 // A0A1S3RIX0 // A0A1S3KPC7 // A0A1S3MYK9 // A0A1S3RNL9 // A0A1S3PEJ9 // A0A1S3MUA3 // B5DGL3 // C0PU89 // A0A1S3P376 // B9EMU9 // A0A1S3KJ…
GO:0034641	BP	cellular nitrogen compound metabolic process	22	636	3.45912	716	65384	1.09507	3.15881	4.4e-06	0.00018	// B5XCP6 // B5X3E6 // B5X319 // B5X205 // B5XFJ9 // B5X919 // B5X434 // C0H907 // Q7ZZK9 // Q7ZZK8 // B5X2J4 // C0HA51 // C0H8Q7 // B5X340 // Q7ZZL0 // B5X1P3 // B9EM17 // B5X4T8 // B5X1V6 // B9ELA9 // B5XD88 // B5XBZ7	// A0A1S3MSE8 // A0A1S3MB92 // A0A1S3MB97 // A0A1S3PSZ6 // A0A1S3M2M9 // C0H9V7 // A0A1S3N0K4 // B5X4F2 // A0A1S3P7Z9 // A0A1S3NL90 // A0A1S3KL23 // A0A1S3N2K1 // A0A1S3ME44 // B5XGF7 // A0A1S3KUT1 // A0A1S3PV30 // A0A1S3KPC7 // A0A1S3MUA7 // A0A1S3RWX3 // C0PU89 // A0A1S3P376 // A0A1S3NJT5 // A0A1S3LI09 // A0A1S3SGM1 // A0A1S3KJB2 // A0A1S3QF15 // A0A1S3LER1 // A0A1S3RR12 // B5X205 // B5X5R6 // …
GO:0007015	BP	actin filament organization	14	636	2.20126	457	65384	0.698948	3.14939	0.00022	0.0049	// C7C4W8 // B5XB79 // B5X4T2 // B5X2M7 // C0H9I5 // B5XCW2 // B5X3R3 // B5DG25 // B5XAM0 // B9ELH2 // C0HBE5 // B5X4K0 // C0H8S8 // B5DG56	// A0A1S3QMM5 // A0A1S3P571 // A0A1S3Q9L8 // A0A1S3Q9L4 // A0A1S3Q9L0 // A0A1S3MGC3 // A0A1S3RKM1 // A0A1S3KL27 // B5XCW2 // B5XG16 // A0A1S3MQR3 // A0A1S3RG30 // B5X7J0 // B5X7J3 // B5DGL1 // A0A1S3RBG3 // A0A1S3QNW0 // A0A1S3RJ34 // A0A1S3QSA1 // A0A1S3RJ33 // A0A1S3KPH3 // A0A1S3NHE9 // B9EM18 // B5XC25 // A0A1S3SLW7 // A0A1S3NJG0 // B9EM12 // A0A1S3KXA3 // B5XCV7 // A0A1S3MNK0 // A0A1S3KP47 /…
GO:0019538	BP	protein metabolic process	101	636	15.8805	3306	65384	5.05628	3.14075	4.8e-21	7.3e-18	// B5DGK7 // B5DGK9 // B5X352 // C0HBF1 // B5DG81 // C0H7M0 // B5X6L7 // B5XDA1 // B5XDA7 // B5DGU9 // C0HAB9 // B5DGU4 // C0HAB6 // B5DG94 // B5XCG8 // B5XEW6 // C0HAC7 // C0H7H1 // B5DGV7 // B5DGV0 // B5DGV2 // C0HAC0 // B5X467 // A7KIL2 // B5X8X3 // V9Q6E2 // C0H8V2 // B5X6N3 // B5X5S8 // B9EMD3 // Q0KFS6 // C0H7C2 // B5DFY9 // B5X668 // C0H7I9 // C0HBS7 // B5DGW8 // B5X1F9 // B5XA06 // C0H8W0…	// B9EPU0 // A0A1S3NPT8 // B5X441 // B5X440 // B9EPU7 // A0A1S3Q9L2 // A0A1S3MGC5 // A0A1S3LZC5 // A0A1S3NA10 // A0A1S3P6Z5 // B5RI65 // B9EM04 // A0A1S3S8M2 // B5RI62 // C0HBF1 // C0HBF0 // A0A1S3KXH0 // B9EQ59 // A0A1S3N5L0 // A0A1S3R8T8 // A0A1S3SF11 // A0A1S3SF13 // A0A1S3SF12 // A0A1S3RQS6 // B5X599 // A0A1S3KVL6 // A0A1S3RDI1 // A0A1S3SZN7 // B5X841 // A0A1S3QCH0 // A0A1S3QCH2 // A0A1S3MSB2…
GO:0030163	BP	protein catabolic process	20	636	3.14465	660	65384	1.00942	3.1153	1.4e-05	0.00046	// C0HAC7 // C0H9L3 // C0H856 // B5XCG8 // B5DGV0 // C0HAF9 // B5X6N3 // B5XGP5 // C0HAC0 // B5X4M3 // B5XGI9 // B5DGU9 // C0HAB9 // B9ENE1 // B5DG36 // B5XD66 // C0H8W0 // C0H8V2 // B5DGU4 // B5RI28	// A0A1S3SXI2 // B5XAL3 // A0A1S3P478 // B9EPU7 // A0A1S3MDV4 // B5X6M2 // A0A1S3RTX4 // A0A1S3KMG9 // A0A1S3M1W8 // B5XC96 // A0A1S3QX88 // A0A1S3NQV8 // A0A1S3L946 // B5XA59 // A0A1S3SF12 // A0A1S3RQS6 // B5XA50 // A0A1S3RDI1 // A0A1S3PDQ4 // A0A1S3MUA9 // B5XFW6 // A0A1S3QCH0 // A0A1S3PYN0 // A0A1S3KHZ2 // A0A1S3RE52 // A0A1S3LD63 // A0A1S3LER3 // A0A1S3KT49 // A0A1S3LD68 // A0A1S3PV72 // A0A1…
GO:0019318	BP	hexose metabolic process	9	636	1.41509	299	65384	0.457298	3.09447	0.0031	0.045	// B5DGL3 // B5X4B0 // B5X3K2 // B9EM17 // B9EMU9 // B5DGQ7 // K4J7W7 // C0HAA0 // B5XE29	// A0A1S3NAG1 // B9EPN0 // A0A1S3MI30 // A0A1S3MZQ2 // B5X5Z9 // A0A1S3KU63 // A0A1S3NV54 // A0A1S3MFP2 // A0A1S3S1F2 // B5DGT9 // A0A1S3P206 // A0A1S3LSB6 // A0A1S3Q5S7 // C0H981 // B5RIA1 // C0HAA0 // B5XE29 // A0A1S3Q6S9 // B9EM22 // A0A1S3MYS2 // A0A1S3NBU4 // A0A1S3MKZ8 // B5XGF1 // A0A1S3NCF5 // B5X6U5 // A0A1S3NCF0 // A0A1S3PKB5 // A0A1S3L341 // A0A1S3PW39 // A0A1S3LCS4 // A0A1S3KPC9 // A0…
GO:0044267	BP	cellular protein metabolic process	94	636	14.7799	3189	65384	4.87734	3.03031	7.9e-19	3e-16	// B5DGK7 // B5DGK9 // B5X352 // C0HBF1 // B5DG81 // C0H7M0 // B5X6L7 // B5XDA1 // B5XDA7 // C0HAB9 // B5DGU4 // C0HAB6 // B5DG94 // B5XCG8 // B5XEW6 // B5XCP6 // C0H7H1 // B5DGV7 // B5DGV2 // C0HAC0 // B5X467 // A7KIL2 // B5X8X3 // V9Q6E2 // B5X6N3 // B5X5S8 // B9EMD3 // Q0KFS6 // C0H7C2 // B5DFY9 // B5X668 // C0H7I9 // B5DGW8 // B5X1F9 // B5XA06 // C0H8W0 // B5XB25 // B5X1Z2 // B5XGP5 // B5RI17…	// B9EPU0 // A0A1S3NPT8 // B5X441 // B5X440 // B9EPU7 // A0A1S3Q9L2 // A0A1S3MGC5 // A0A1S3LZC5 // A0A1S3NA10 // A0A1S3P6Z5 // B5RI65 // B9EM04 // A0A1S3S8M2 // B5RI62 // C0HBF1 // C0HBF0 // A0A1S3KXH0 // B9EQ59 // A0A1S3R8T8 // A0A1S3SF11 // A0A1S3SF13 // A0A1S3SF12 // A0A1S3RQS6 // B5X599 // A0A1S3KVL6 // A0A1S3RDI1 // A0A1S3SZN7 // B5X841 // A0A1S3QCH0 // A0A1S3QCH2 // A0A1S3MSB2 // A0A1S3MSB1…
GO:0009057	BP	macromolecule catabolic process	29	636	4.55975	1010	65384	1.54472	2.95183	6.1e-07	4.1e-05	// C0HAC7 // B5X4B0 // B5DGV0 // C0HAC0 // C0H9L3 // B5XD66 // C0H8V2 // B5XE29 // B5RI28 // B5DG42 // B5DGL3 // B5XCG8 // Q98SJ9 // C0HAF9 // B5X6N3 // B5X6L7 // B5X4M3 // B5DGU9 // C0HAB9 // B9ENE1 // C0H8W0 // B5DGU4 // C0H856 // B5X3K2 // B5XGP5 // B9EM17 // B5DGQ7 // B5XGI9 // B5DG36	// A0A1S3SXI2 // C0H7J5 // B5XAV2 // A0A1S3LFV3 // B9EPU7 // A0A1S3LFL0 // A0A1S3MDV4 // B5X6M2 // A0A1S3NDY3 // A0A1S3PKS8 // B5XB51 // A0A1S3LSB6 // A0A1S3KMG9 // A0A1S3M1W8 // B5XC96 // B9ELV6 // B5XE29 // A0A1S3QX88 // A0A1S3PFE0 // A0A1S3L946 // B5XA59 // B5XA57 // B5XGF1 // A0A1S3MZY9 // A0A1S3SF12 // A0A1S3RQS6 // B5XA50 // A0A1S3RDI1 // A0A1S3PDQ4 // A0A1S3MUA9 // A0A1S3MYK8 // B5XFW6 // …
GO:0034622	BP	cellular macromolecular complex assembly	20	636	3.14465	759	65384	1.16083	2.70896	9.4e-05	0.0023	// B5DG25 // B9ELD5 // B5DGS1 // B5X4T2 // B9ELQ9 // B9ENH4 // P84408 // B5X2M7 // B5XF07 // B5XFF0 // B5XCW2 // B5X3R3 // B9EMD3 // C0H8S8 // C0H823 // B5X0W4 // C0HBE1 // B5X4K0 // B5DFV7 // B5DG56	// A0A1S3M4J6 // A0A1S3NSS7 // B9EPU6 // A0A1S3RNG4 // B9EPK8 // B5X449 // A0A1S3L865 // A0A1S3SIT2 // A0A1S3SIT4 // C0HAZ6 // B5X9J4 // A0A1S3SU36 // A0A1S3LJH3 // B5XGF4 // B5XA52 // A0A1S3PQW4 // A0A1S3P197 // B5X7J0 // B5X8U5 // A0A1S3MLZ0 // A0A1S3RBG3 // B5X8F3 // A0A1S3QSA1 // A0A1S3RJ33 // A0A1S3LHV3 // A0A1S3S0C3 // A0A1S3LER8 // A0A1S3M9M5 // B5X5R2 // B5XC29 // A0A1S3ST02 // B9EQ04 // …
GO:0042592	BP	homeostatic process	15	636	2.35849	576	65384	0.880949	2.67721	0.00072	0.013	// D0QEL0 // A0A0G3B776 // C0PUP1 // C0HAC0 // B5X291 // C0HBF4 // B5X740 // B5X3C0 // B5X1H7 // B5X9L4 // C0PU58 // B5X5Q6 // B5X8H5 // C0PU56 // B5X7X7	// B5X291 // B5X292 // A0A1S3RZE5 // A0A1S3M6S8 // A0A1S3LSB6 // A0A1S3MH64 // B5XE28 // A0A1S3PFE6 // A0A1S3PFE0 // A0A1S3KXH2 // A0A1S3KXH3 // A0A1S3SHX4 // A0A1S3R659 // A0A1S3QAD3 // A0A1S3Q9E3 // A0A1S3MF23 // A0A1S3MF21 // A0A1S3MNE5 // B5X847 // A0A1S3QBU6 // A0A1S3N1V0 // A0A1S3MS04 // A0A1S3PBL0 // A0A1S3QB03 // A0A1S3PZA1 // A0A1S3PZM8 // P49946 // P49947 // A0A1S3LB65 // B9EM15 // A0A1…
GO:0042221	BP	response to chemical stimulus	13	636	2.04403	516	65384	0.789184	2.59005	0.0021	0.033	// C0HBD9 // B9ELD5 // C7EY83 // B5X397 // C0HB24 // B5XFJ9 // Q9W6K6 // Q6XPT2 // Q5J7P6 // B5X329 // B5DGU4 // B5X7X4 // A0A0F6QNL8	// A0A1S3QDX6 // A0A1S3Q574 // A0A1S3QIT0 // B5XC95 // Q709D2 // A0A1S3N647 // A0A1S3L229 // A0A1S3SZN5 // A0A1S3QXV8 // A0A1S3N2K1 // A0A1S3QGI5 // A0A1S3NDR3 // A0A1S3NKG6 // A0A1S3P056 // A0A1S3QCH2 // A0A1S3MSB1 // A0A1S3QXP4 // A0A1S3RBG3 // A0A1S3RXH6 // C0PU84 // A0A1S3Q1B6 // A0A1S3QTX6 // A0A1S3SWV1 // A0A1S3LER3 // Q2EMR5 // B5X7T6 // A0A1S3QWL8 // B5X3X6 // A0A1S3SDG3 // A0A1S3T5G1 // …
GO:0034621	BP	cellular macromolecular complex subunit organization	22	636	3.45912	881	65384	1.34742	2.56721	9.4e-05	0.0023	// B5DFV7 // B5X0W4 // B9ENH4 // P84408 // B5X9W2 // C0H8S8 // B5XFF0 // B5XCW2 // B9EMD3 // B5DG25 // C0H823 // B5X4K0 // B9ELQ9 // B9ELD5 // B5XF07 // B9ELH2 // B5DGS1 // B5X4T2 // B5X2M7 // B5X3R3 // C0HBE1 // B5DG56	// A0A1S3M4J6 // A0A1S3P571 // A0A1S3NSS7 // A0A1S3Q9L8 // A0A1S3RNG4 // A0A1S3Q9L4 // B5X449 // A0A1S3L865 // A0A1S3Q9L0 // A0A1S3STB6 // A0A1S3SIT2 // A0A1S3PLW1 // C0HAZ6 // B5X9J4 // A0A1S3SU36 // A0A1S3LJH3 // B5XCW2 // B9EPU6 // B5XGF4 // B5XA52 // A0A1S3MQR3 // A0A1S3PQW4 // A0A1S3P197 // B5X7J0 // B5X8U5 // B5DGL1 // A0A1S3MLZ0 // A0A1S3RBG3 // A0A1S3QNW0 // B5X8F3 // A0A1S3QSA1 // A0A1S3…
GO:0051186	BP	cofactor metabolic process	12	636	1.88679	481	65384	0.735654	2.56478	0.0033	0.047	// B5DG87 // B9EM17 // C0H9E7 // B5X3C0 // B5XFJ9 // B5X212 // B5XFF3 // B5X4R5 // C0H9U1 // B5X156 // B5XAM9 // B5X4K3	// A0A1S3L755 // A0A1S3MSE8 // A0A1S3LSD9 // B5XF85 // A0A1S3MB92 // A0A1S3MB97 // A0A1S3RIQ4 // A0A1S3RTX1 // A0A1S3MIZ7 // A0A1S3Q5S5 // A0A1S3N2K1 // A0A1S3PPW1 // A0A1S3KUT1 // A0A1S3PEJ9 // A0A1S3LE56 // A0A1S3LI09 // A0A1S3SGM1 // B5X5R6 // B9EM17 // C0PU79 // B5X0X6 // A0A1S3NRA9 // A0A1S3P282 // A0A1S3QTW1 // A0A1S3R8S7 // A0A1S3PI78 // A0A1S3Q4Z5 // A0A1S3NYB1 // A0A1S3NYB2 // A0A1S3SII5…
GO:0044281	BP	small molecule metabolic process	61	636	9.59119	2463	65384	3.76698	2.54613	3.9e-10	6e-08	// B5XCP6 // B5X4B0 // B5DGM5 // B5XBZ7 // C0H9X1 // B5X215 // B5DGP1 // B5X352 // B5X319 // C0HAA0 // B5XE29 // B5XCJ8 // B5XFJ9 // B5X919 // C0H868 // B5X0S0 // B5DG87 // C0H9E7 // B5X3N4 // B5X434 // C0H907 // B5XAD3 // B5XD97 // Q7ZZK9 // Q7ZZK8 // B5X2J4 // B5X1P3 // K4J7W7 // B5X4K3 // B5DGL3 // Q98SJ9 // B5X248 // B5DG78 // C0H9F4 // B5RI36 // B5DGQ7 // B5X4R5 // C0H8Q7 // C0H9U1 // B5XCD3…	// A0A1S3QDX4 // A0A1S3N0A3 // A0A1S3NI26 // A0A1S3Q5Y4 // A0A1S3MP04 // A0A1S3MSE8 // A0A1S3LSB6 // A0A1S3LME1 // A0A1S3R6Y8 // C0H9M4 // B5X597 // B5X0Q7 // A0A1S3KP55 // A0A1S3PPW1 // A0A1S3LVB7 // C0PU89 // C0H9F4 // A0A1S3KJB2 // A0A1S3N7Y1 // A0A1S3QF15 // A0A1S3QPG7 // B5X205 // B5X5R6 // A0A1S3S977 // A0A1S3S970 // A0A1S3MTH5 // A0A1S3MIQ1 // A0A1S3R2A6 // A0A1S3S979 // A0A1S3R401 // A0A1…
GO:0044265	BP	cellular macromolecule catabolic process	23	636	3.61635	953	65384	1.45754	2.48113	0.00011	0.0026	// B5X4B0 // C0HAC0 // C0H9L3 // B5XD66 // B5XE29 // B5DG42 // B5DGL3 // B5XCG8 // Q98SJ9 // C0HAF9 // B5X6N3 // B5X6L7 // B5X4M3 // C0HAB9 // B5DGQ7 // C0H8W0 // B5DGU4 // C0H856 // B5X3K2 // B5XGP5 // B9EM17 // B9ENE1 // B5XGI9	// A0A1S3SXI2 // C0H7J5 // B5XAV2 // A0A1S3LFV3 // B9EPU7 // A0A1S3LFL0 // A0A1S3MDV4 // A0A1S3NDY3 // A0A1S3PKS8 // B5XB51 // A0A1S3LSB6 // A0A1S3KMG9 // A0A1S3M1W8 // B5XC96 // B9ELV6 // B5XE29 // A0A1S3QX88 // A0A1S3PFE0 // A0A1S3L946 // B5XA59 // B5XA57 // B5XGF1 // A0A1S3MZY9 // A0A1S3SF12 // A0A1S3RQS6 // B5XA50 // A0A1S3RDI1 // A0A1S3PDQ4 // A0A1S3MUA9 // A0A1S3MYK8 // B5XFW6 // A0A1S3QCH0…
GO:0009056	BP	catabolic process	37	636	5.81761	1669	65384	2.55261	2.27908	8.6e-06	0.00033	// C0HAC7 // B5X4B0 // B5DGV0 // C0HAC0 // B5X4Y9 // C0H9L3 // B5XD66 // C0H8V2 // B5XE29 // B5RI28 // B5X1Q1 // B5X919 // B5XFJ9 // B5DG42 // B5DGL3 // B5XCG8 // Q98SJ9 // C0HAF9 // B5X6N3 // B5X6L7 // B5X4M3 // C0H9F4 // C0HAB9 // B9ENE1 // C0H8W0 // B5DGU4 // B5XAM9 // C0PU77 // B5DGU9 // C0H856 // B5X3K2 // B5XGP5 // B9EM17 // B5DGQ7 // B5XGI9 // B5DG36 // C0H935	// A0A1S3QUL8 // B5X441 // B9EPU7 // A0A1S3QG24 // A0A1S3NDY3 // A0A1S3R719 // A0A1S3LSB6 // B9ELV6 // A0A1S3MAK7 // B9EQ59 // A0A1S3MZY9 // A0A1S3SF12 // A0A1S3RQS6 // A0A1S3RDI1 // A0A1S3MF22 // A0A1S3KVL3 // A0A1S3QCH0 // A0A1S3MAY6 // C0H9F4 // C0HB88 // A0A1S3RR12 // A0A1S3KHZ2 // A0A1S3MIQ1 // A0A1S3T3E6 // A0A1S3RAA9 // A0A1S3QTW1 // C0HAC7 // C0HAC0 // B5XG31 // C0HAC8 // A0A1S3LGS1 // A0…
GO:0044248	BP	cellular catabolic process	30	636	4.71698	1469	65384	2.24673	2.09949	0.00022	0.0049	// B5X4B0 // C0HAC0 // C0H9L3 // B5XD66 // B5XE29 // B5X1Q1 // B5X919 // B5XFJ9 // B5DG42 // B5DGL3 // B5XCG8 // Q98SJ9 // C0HAF9 // B5X6N3 // B5X6L7 // B5X4M3 // C0H9F4 // C0HAB9 // B9ENE1 // C0H8W0 // B5DGU4 // B5XAM9 // C0PU77 // C0H856 // B5X3K2 // B5XGP5 // B9EM17 // B5DGQ7 // B5XGI9 // C0H935	// A0A1S3QUL8 // B5X441 // B9EPU7 // A0A1S3QG24 // A0A1S3NDY3 // A0A1S3LSB6 // B9ELV6 // B9EQ59 // A0A1S3MZY9 // A0A1S3SF12 // A0A1S3RQS6 // A0A1S3RDI1 // A0A1S3MF22 // A0A1S3KVL3 // A0A1S3QCH0 // C0H9F4 // C0HB88 // A0A1S3RR12 // A0A1S3KHZ2 // A0A1S3MIQ1 // A0A1S3T3E6 // A0A1S3RAA9 // A0A1S3QTW1 // C0HAC0 // B5XG31 // A0A1S3LGS1 // A0A1S3LGS0 // A0A1S3SSF5 // A0A1S3LGS5 // A0A1S3LGS4 // A0A1S3SJ…
GO:0045184	BP	establishment of protein localization	22	636	3.45912	1079	65384	1.65025	2.09612	0.0014	0.022	// C0H9V3 // B5X179 // B5X152 // B5X2Y5 // B5X5I1 // B5X3S5 // C0PUF2 // B5X1S6 // C0H9L3 // B5X361 // C0H9L8 // B5X5T0 // C0H8J4 // B5XF89 // B9ELU2 // Q0H918 // Q9PSX2 // B5DG14 // F5B7Y3 // F5B7Y2 // C0HBE1 // B5X3T4	// A0A1S3T5P0 // A0A1S3T5P1 // A0A1S3RD27 // A0A1S3LUR5 // A0A1S3SKX3 // B9EPU7 // A0A1S3RG86 // A0A1S3NS98 // A0A1S3M9V5 // A0A1S3KJY8 // A0A1S3QDX9 // A0A1S3T0D1 // A0A1S3T0D3 // A0A1S3KMG3 // B9EM05 // A0A1S3NPQ1 // A0A1S3T5P4 // A0A1S3RNP4 // B5RI60 // B5X120 // B5XC93 // A0A1S3M8N6 // A0A1S3QXV4 // B5X0Q8 // B9EQ55 // B5XA55 // A0A1S3Q3Z4 // A0A1S3QYA8 // B5X8U7 // A0A1S3Q507 // A0A1S3KK43 /…
GO:0015031	BP	protein transport	22	636	3.45912	1079	65384	1.65025	2.09612	0.0014	0.022	// C0H9V3 // B5X179 // B5X152 // B5X2Y5 // B5X5I1 // B5X3S5 // C0PUF2 // B5X1S6 // C0H9L3 // B5X361 // C0H9L8 // B5X5T0 // C0H8J4 // B5XF89 // B9ELU2 // Q0H918 // Q9PSX2 // B5DG14 // F5B7Y3 // F5B7Y2 // C0HBE1 // B5X3T4	// A0A1S3T5P0 // A0A1S3T5P1 // A0A1S3RD27 // A0A1S3LUR5 // A0A1S3SKX3 // B9EPU7 // A0A1S3RG86 // A0A1S3NS98 // A0A1S3M9V5 // A0A1S3KJY8 // A0A1S3QDX9 // A0A1S3T0D1 // A0A1S3T0D3 // A0A1S3KMG3 // B9EM05 // A0A1S3NPQ1 // A0A1S3T5P4 // A0A1S3RNP4 // B5RI60 // B5X120 // B5XC93 // A0A1S3M8N6 // A0A1S3QXV4 // B5X0Q8 // B9EQ55 // B5XA55 // A0A1S3Q3Z4 // A0A1S3QYA8 // B5X8U7 // A0A1S3Q507 // A0A1S3KK43 /…
GO:0065008	BP	regulation of biological quality	28	636	4.40252	1402	65384	2.14426	2.05317	0.00048	0.0093	// C0PUP1 // C0HAC0 // B5X291 // B5X3C0 // B5X9L4 // B5X179 // V9Q6E2 // C0HBF4 // B5X5Q6 // B5X1H7 // B5DG25 // Q2L6S9 // A0A0G3B776 // B5X740 // C0HB63 // B5X8H5 // B5X4A7 // C0H8S8 // D0QEL0 // B5X4T2 // B5X2M7 // B5X3R3 // B5X3I9 // C0PU58 // C0PU56 // B5X7X7 // B5X7X4 // B5DG56	// A0A1S3LSB6 // A0A1S3LSB9 // A0A1S3LME5 // A0A1S3KXH2 // A0A1S3KXH3 // A0A1S3QAD3 // A0A1S3MF23 // A0A1S3MF21 // B5X847 // A0A1S3Q4N4 // A0A1S3R7G7 // A0A1S3RBG3 // A0A1S3N1V0 // A0A1S3QNW0 // A0A1S3PBL4 // A0A1S3PBL0 // A0A1S3PZM8 // P49946 // P49947 // B5X5R2 // A0A1S3RSI1 // A0A1S3SHA9 // A0A1S3MVD8 // A0A1S3PXQ0 // A0A1S3LAU1 // C0HAC0 // A0A1S3LLA1 // A0A1S3R9B0 // A0A1S3QVM0 // A0A1S3L4X2…
GO:0044085	BP	cellular component biogenesis	30	636	4.71698	1528	65384	2.33696	2.01842	0.00041	0.0082	// B5X4L6 // C0H9I5 // B5X9W9 // B5DFV7 // B5X0W4 // B9ENH4 // P84408 // B5XFF0 // C0H8G4 // B5XCW2 // B9EMD3 // B5DG25 // C0H823 // B5XDP1 // B5X4K0 // B5DGS1 // B9ELQ9 // B9ELD5 // B5XF07 // C0H9F2 // B5X4T2 // C0H9H4 // C0H8S8 // C7C4W8 // C0HB28 // B5X2M7 // B5X3R3 // B5X4H4 // C0HBE1 // B5DG56	// A0A1S3QMM5 // B9EPU6 // A0A1S3SUC3 // B5X449 // A0A1S3LCY7 // A0A1S3P6R5 // B5X9J4 // B9EQ58 // B9EPH6 // C0H9S0 // A0A1S3LQ97 // A0A1S3RBG3 // B5X8F3 // C0H9F5 // A0A1S3RQE9 // C0H9F2 // A0A1S3RR14 // B5X5R2 // A0A1S3R409 // A0A1S3PFL3 // A0A1S3RUU8 // A0A1S3LWZ7 // A0A1S3LAU1 // A0A1S3S9A8 // A0A1S3S9A9 // A0A1S3S9A6 // A0A1S3S9A7 // A0A1S3S9A4 // A0A1S3S9A5 // A0A1S3S9A2 // A0A1S3S9A1 // A0…
GO:0044238	BP	primary metabolic process	200	636	31.4465	10642	65384	16.2762	1.93206	9.4e-15	2.4e-12	// B5DGK7 // B5X9T1 // B5X1Z2 // C0HAR3 // B5DGK9 // B5X3C0 // B9ELK0 // B5RI68 // B5X215 // C0HBN2 // B9ENW3 // B5X352 // C0HAA0 // B5XE29 // C0HBF1 // C0H7E8 // B5DGC6 // B9ENF4 // B5DG81 // B5XCD3 // C0H7M0 // B5XD97 // B5X3S9 // C0HAS3 // B5X3S2 // B5X2S3 // C0HBQ6 // B5DGL3 // C0H9N4 // C0H8Y3 // B5XDA7 // C0H9F4 // B9EMU9 // C0H8Q7 // U5KQM7 // B5X205 // B5DGU4 // C0HAB6 // C0PU77 // B5X1K2…	// A0A1S3PJM7 // A0A1S3S8M2 // A0A1S3KXH5 // C0HBF1 // A0A1S3RBU5 // A0A1S3KXH0 // C0HBF6 // A0A1S3KXH2 // A0A1S3RQS6 // A0A1S3MF27 // A0A1S3LLZ4 // A0A1S3LQ97 // A0A1S3LVB7 // A0A1S3MF29 // A0A1S3QNW5 // A0A1S3LM37 // A0A1S3LM30 // A0A1S3QNW3 // A0A1S3NF09 // B5XGH2 // A0A1S3KJB2 // B5X8F5 // B5X207 // B5X205 // A0A1S3NF04 // B5X201 // A0A1S3LBR6 // A0A1S3MTH5 // A0A1S3RSI5 // A0A1S3RQ86 // A0A1…
GO:0008152	BP	metabolic process	230	636	36.1635	12382	65384	18.9374	1.90964	7.5e-16	2.3e-13	// B5DGK7 // B5X1Z2 // B5X1C1 // C0HAR3 // B5DGK9 // B5X3C0 // B5X212 // B9ELK0 // B5RI68 // B5X215 // C0HBN2 // B9ENW3 // B5X352 // C0HAA0 // B5XE16 // B5XE29 // C0HBF1 // C0H7E8 // C0H868 // B5DG87 // C0HAN5 // B9ENF4 // B5DG81 // B5XCD3 // C0H7M0 // B5XD97 // B5X3S9 // C7EY83 // C0HAS3 // B5X3S2 // B5X2S3 // C0HBQ6 // B5DGL3 // A0A0G3B776 // C0H9N4 // C0H8Y3 // B5XDA7 // C0H9F4 // B5X9K8 // C0…	// A0A1S3QDX6 // A0A1S3QDX4 // A0A1S3NPT8 // A0A1S3QG24 // A0A1S3PJM7 // A0A1S3S8M2 // A0A1S3KXH5 // C0HBF1 // C0HBF0 // A0A1S3KXH0 // C0HBF6 // A0A1S3KXH2 // C0H9S3 // A0A1S3RQS6 // A0A1S3MF27 // A0A1S3MF22 // A0A1S3LLZ4 // A0A1S3LQ97 // A0A1S3LVB7 // A0A1S3MF29 // A0A1S3NZJ4 // A0A1S3QNW5 // A0A1S3LM37 // A0A1S3LM30 // A0A1S3QNW3 // A0A1S3NF09 // B5XGH2 // A0A1S3KJB2 // B5X8F5 // B5X207 // B5X2…
GO:0043170	BP	macromolecule metabolic process	157	636	24.6855	8557	65384	13.0873	1.88622	1.3e-11	2.4e-09	// B5DGK7 // C0HAR3 // B5DGK9 // B9ELK0 // B5RI68 // C0HBN2 // B9ENW3 // B5X352 // B5XE29 // C0HBF1 // C0H7E8 // B9ENF4 // B5DG81 // C0H7M0 // B5X3S9 // C0HAF8 // B5X3S2 // Q6XPT2 // C0HBQ6 // B5DGL3 // C0H9N4 // B5XDA1 // B5XDA7 // B5DGU9 // C0HAB9 // B5DGU4 // C0HAB6 // B5X1K2 // B5X3K2 // B5X5R0 // B5DG94 // B9EM17 // B5X4V3 // Q683Z3 // B5XEW6 // C0HAC7 // C0H7H1 // B5XCG8 // B5DGV0 // B5DGV2…	// A0A1S3PJM7 // A0A1S3S8M2 // A0A1S3KXH5 // C0HBF1 // C0HBF0 // A0A1S3KXH0 // C0HBF6 // A0A1S3KXH2 // A0A1S3RQS6 // A0A1S3MF27 // A0A1S3LQ97 // A0A1S3MF29 // A0A1S3QNW5 // A0A1S3LM37 // A0A1S3LM30 // A0A1S3QNW3 // A0A1S3NF09 // B5XGH2 // B5X8F1 // B5X8F5 // B5X207 // A0A1S3NF04 // B5X201 // A0A1S3LBR6 // A0A1S3RSI8 // A0A1S3RSI5 // A0A1S3RSI2 // A0A1S3M8G3 // A0A1S3R396 // A0A1S3Q7H3 // A0A1S3T5…
GO:0044237	BP	cellular metabolic process	207	636	32.5472	11323	65384	17.3177	1.87942	4.3e-14	9.4e-12	// B5DGK7 // B5X9T1 // B5X1Z2 // C0HAR3 // B5DGK9 // B5X3C0 // B5X212 // B9ELK0 // B5RI68 // B5X215 // C0HBN2 // B9ENW3 // B5X352 // C0HAA0 // B5XE16 // B5XE29 // C0HBF1 // C0H7E8 // B5DG87 // C0HAN5 // B9ENF4 // B5DG81 // B5XCD3 // C0H7M0 // B5XD97 // B5X3S9 // C0HAF8 // B5X3S2 // B5X2S3 // C0HBQ6 // B5DGL3 // C0H9N4 // C0H8Y3 // B5XDA7 // C0H9F4 // B5X9K8 // C0H8Q7 // B5X205 // B2XBN7 // C0HAB6…	// A0A1S3QDX6 // A0A1S3QDX4 // A0A1S3NPT8 // A0A1S3QG24 // A0A1S3PJM7 // A0A1S3S8M2 // A0A1S3KXH5 // C0HBF1 // C0HBF0 // A0A1S3KXH0 // C0HBF6 // A0A1S3KXH2 // A0A1S3RQS6 // A0A1S3MF27 // A0A1S3MF22 // A0A1S3LLZ4 // A0A1S3LQ97 // A0A1S3MF29 // A0A1S3NZJ4 // A0A1S3QNW5 // A0A1S3LM37 // A0A1S3LM30 // A0A1S3QNW3 // A0A1S3NF09 // B5XGH2 // A0A1S3KJB2 // B5X8F5 // B5X207 // B5X205 // A0A1S3NF04 // B5X2…
GO:0044260	BP	cellular macromolecule metabolic process	147	636	23.1132	8216	65384	12.5658	1.83938	2.2e-10	3.7e-08	// B5DGK7 // C0HAR3 // B5DGK9 // B9ELK0 // B5RI68 // C0HBN2 // B9ENW3 // B5X352 // B5XE29 // C0HBF1 // C0H7E8 // B9ENF4 // B5DG81 // C0H7M0 // B5X3S9 // C0HAF8 // B5X3S2 // Q6XPT2 // C0HBQ6 // B5DGL3 // C0H9N4 // B5XDA1 // B5XDA7 // C0HAB9 // B5DGU4 // C0HAB6 // B5X1K2 // B5X3K2 // B5X5R0 // B5DG94 // B9EM17 // B5X4V3 // Q683Z3 // B5XEW6 // B5XCP6 // C0H7H1 // B5XCG8 // B5DGV2 // C0HAC0 // B5X467…	// A0A1S3PJM7 // A0A1S3S8M2 // A0A1S3KXH5 // C0HBF1 // C0HBF0 // A0A1S3KXH0 // C0HBF6 // A0A1S3KXH2 // A0A1S3RQS6 // A0A1S3MF27 // A0A1S3LQ97 // A0A1S3MF29 // A0A1S3QNW5 // A0A1S3LM37 // A0A1S3LM30 // A0A1S3QNW3 // A0A1S3NF09 // B5XGH2 // B5X8F1 // B5X8F5 // B5X207 // A0A1S3NF04 // B5X201 // A0A1S3LBR6 // A0A1S3RSI8 // A0A1S3RSI5 // A0A1S3RSI2 // A0A1S3M8G3 // A0A1S3R396 // A0A1S3Q7H3 // A0A1S3T5…
GO:0009058	BP	biosynthetic process	109	636	17.1384	6136	65384	9.38456	1.82623	3.3e-08	3.4e-06	// B5DGK7 // B5X9T1 // B5X1C1 // C0HAR3 // B5DGK9 // B5X212 // B5X215 // B9ENW3 // B5X919 // C0H7E8 // B5DGC6 // C0H9E7 // B5XCD3 // C0H7M0 // B5X3S9 // C7EY83 // B5DGL3 // A0A0G3B776 // C0H9N4 // B5XDA1 // B5XDA7 // B9EMU9 // C0H8Q7 // B5X205 // B5X5R0 // B5X4V3 // B5XD88 // Q683Z3 // B5X195 // B5XEW6 // B5XCP6 // C0H7H1 // B5DGV7 // B5DGM5 // B5DGV2 // B5DGV3 // B5X467 // A7KIL2 // B5X8X3 // B5…	// A0A1S3S8M2 // A0A1S3KXH5 // A0A1S3KXH0 // C0HBF6 // A0A1S3MF27 // A0A1S3LQ97 // A0A1S3LVB7 // A0A1S3MF29 // A0A1S3QNW5 // A0A1S3LM37 // A0A1S3LM30 // A0A1S3QNW3 // A0A1S3NF09 // B5XGH2 // A0A1S3KJB2 // B5X205 // A0A1S3NF04 // B5X201 // A0A1S3QGC3 // A0A1S3RSI8 // A0A1S3RSI2 // A0A1S3R396 // A0A1S3Q7H3 // A0A1S3T5G1 // A0A1S3S378 // A0A1S3P2X9 // A0A1S3RAS3 // A0A1S3P2X2 // A0A1S3P2X7 // A0A1S3…
GO:0044249	BP	cellular biosynthetic process	103	636	16.195	5933	65384	9.07409	1.78475	1.9e-07	1.6e-05	// B5DGK7 // B5X9T1 // C0HAR3 // B5DGK9 // B5X212 // B5X215 // B9ENW3 // C0H7E8 // B5DGC6 // C0H9E7 // B5XCD3 // C0H7M0 // B5X3S9 // B5DGL3 // C0H9N4 // B5XDA1 // B5XDA7 // B9EMU9 // C0H8Q7 // B5X5R0 // B5X4V3 // B5XD88 // Q683Z3 // B5X195 // B5XEW6 // B5XCP6 // C0H7H1 // B5DGV7 // B5DGM5 // B5DGV2 // B5DGV3 // B5X467 // A7KIL2 // B5X8X3 // B5X3E6 // B5XFD1 // B5X0S0 // B5X5S8 // B5XG35 // B5XAD3…	// A0A1S3S8M2 // A0A1S3KXH5 // A0A1S3KXH0 // C0HBF6 // A0A1S3MF27 // A0A1S3LQ97 // A0A1S3MF29 // A0A1S3QNW5 // A0A1S3LM37 // A0A1S3LM30 // A0A1S3QNW3 // A0A1S3NF09 // B5XGH2 // A0A1S3KJB2 // A0A1S3NF04 // B5X201 // A0A1S3QGC3 // A0A1S3RSI8 // A0A1S3RSI2 // A0A1S3R396 // A0A1S3Q7H3 // A0A1S3T5G1 // A0A1S3S378 // A0A1S3P2X9 // A0A1S3RAS3 // A0A1S3P2X2 // A0A1S3P2X7 // A0A1S3SQ66 // A0A1S3L9T9 // A0…
GO:0010467	BP	gene expression	78	636	12.2642	5099	65384	7.79854	1.57262	0.0002	0.0047	// B5XCP6 // C0H7H1 // B9ELK0 // B5DGV2 // C0H9L3 // B5X7I1 // C7EY83 // E8Z504 // B5DGX5 // A7KIL2 // B5DGX3 // B5X8X3 // B5DGX1 // C0H9R0 // B5X4V3 // B5RI41 // B5XFD1 // B5X329 // B5X0W4 // C0HBN2 // B5DGK9 // B5DGG8 // B9ENH4 // B9ENW3 // B5X9W2 // C0H964 // C0H7G0 // C0H7E8 // B5DGK7 // B5DGV3 // B5X5S8 // B9ENF4 // C0H907 // B5X7J7 // Q6XPT2 // B3TD78 // B5DG42 // B3SUD9 // B5DGJ7 // C0H7C2…	// B9EPU0 // A0A1S3RMI1 // B5XC34 // A0A1S3LK00 // B9ELV8 // A0A1S3LZC7 // A0A1S3LCY7 // A0A1S3RU05 // A0A1S3MT38 // A0A1S3P6R5 // B5RI65 // B5X9J1 // A0A1S3LP47 // A0A1S3LME4 // A0A1S3N5L6 // A0A1S3KXH5 // B9ENF8 // A0A1S3MJW6 // C0HBF6 // A0A1S3N5L0 // A0A1S3LQZ5 // A0A1S3R8T6 // A0A1S3MAD6 // A0A1S3R8T3 // C0H773 // B5X599 // A0A1S3S6J4 // A0A1S3QP54 // B3SUD0 // A0A1S3N3P1 // A0A1S3QPN9 // A0…
GO:0034645	BP	cellular macromolecule biosynthetic process	71	636	11.1635	4736	65384	7.24336	1.54121	0.0006	0.011	// B5XCP6 // C0H7H1 // B9ELK0 // B5DGV2 // B5DGV3 // B5X467 // C7EY83 // C0HAR3 // A7KIL2 // B5DGX3 // B5X8X3 // B5DGX1 // C0H9R0 // B5X771 // B5RI41 // B5XFD1 // C0H9U0 // B5X0W4 // B5DGK9 // B5DGG8 // B9ENH4 // B9ENW3 // B5X9W2 // C0H7G0 // C0H7E8 // B5DGK7 // C0H907 // B5X5S8 // B5XG35 // B5X7I1 // C0H7M0 // Q6XPT2 // B5X3S9 // B5DG42 // B5X2W3 // B3SUD9 // B5DGJ7 // C0H7C2 // B5X2B7 // B5DGX5…	// B9EPU0 // A0A1S3P8D4 // A0A1S3KPS0 // A0A1S3R0H5 // A0A1S3T5Z2 // B9ELV8 // A0A1S3LZC7 // A0A1S3LCY7 // A0A1S3M043 // A0A1S3MT38 // B5RI65 // B5X9J1 // A0A1S3S8M2 // B5RI62 // A0A1S3LME4 // A0A1S3N5L6 // A0A1S3KXH5 // B9ENF8 // A0A1S3MJW6 // A0A1S3KXH0 // C0HBF6 // A0A1S3R8T8 // A0A1S3SF11 // A0A1S3R8T6 // A0A1S3SF13 // A0A1S3R8T3 // C0H773 // B5X599 // A0A1S3S6J4 // A0A1S3MF27 // A0A1S3SZN7 /…
GO:0009059	BP	macromolecule biosynthetic process	71	636	11.1635	4752	65384	7.26783	1.53602	0.00066	0.012	// B5XCP6 // C0H7H1 // B9ELK0 // B5DGV2 // B5DGV3 // B5X467 // C7EY83 // C0HAR3 // A7KIL2 // B5DGX3 // B5X8X3 // B5DGX1 // C0H9R0 // B5X771 // B5RI41 // B5XFD1 // C0H9U0 // B5X0W4 // B5DGK9 // B5DGG8 // B9ENH4 // B9ENW3 // B5X9W2 // C0H7G0 // C0H7E8 // B5DGK7 // C0H907 // B5X5S8 // B5XG35 // B5X7I1 // C0H7M0 // Q6XPT2 // B5X3S9 // B5DG42 // B5X2W3 // B3SUD9 // B5DGJ7 // C0H7C2 // B5X2B7 // B5DGX5…	// B9EPU0 // A0A1S3P8D4 // A0A1S3KPS0 // A0A1S3R0H5 // A0A1S3T5Z2 // B9ELV8 // A0A1S3LZC7 // A0A1S3LCY7 // A0A1S3M043 // A0A1S3MT38 // B5RI65 // B5X9J1 // A0A1S3S8M2 // B5RI62 // A0A1S3LME4 // A0A1S3N5L6 // A0A1S3KXH5 // B9ENF8 // A0A1S3MJW6 // A0A1S3KXH0 // C0HBF6 // A0A1S3R8T8 // A0A1S3SF11 // A0A1S3R8T6 // A0A1S3SF13 // A0A1S3R8T3 // C0H773 // B5X599 // A0A1S3S6J4 // A0A1S3MF27 // A0A1S3SZN7 /…
GO:0009987	BP	cellular process	322	636	50.6289	23418	65384	35.8161	1.41358	3.6e-07	2.8e-05	// B5DGK7 // C0PUP1 // B5X1Z2 // C0H9V3 // D0QEL0 // B5X291 // C0HAR3 // B5DGK9 // B5X3C0 // B5XE27 // B5X212 // B9ELK0 // B5RI68 // B5X215 // Q8UWF4 // C0HBN2 // B9ENW3 // B5X352 // C0HAA0 // P84408 // B5XE29 // B5DG25 // C0HBF1 // C0H7E8 // B5X152 // B5XG35 // C0HBF4 // B5DG87 // C0HAN5 // B5XFF0 // B9ENF4 // B5DG81 // B5XCD3 // B5X5M9 // C0H7M0 // B5XD97 // B5X3S9 // Q2L6S9 // B5X3S5 // B5X3S2…	// A0A1S3QDX6 // A0A1S3QDX4 // A0A1S3LYN0 // A0A1S3QDX9 // A0A1S3PLW5 // A0A1S3PLW0 // A0A1S3PLW1 // A0A1S3PLW3 // A0A1S3KXH5 // A0A1S3KXH0 // A0A1S3KXH2 // A0A1S3LQ98 // A0A1S3LQ97 // A0A1S3LQ95 // A0A1S3QNW8 // A0A1S3LM35 // A0A1S3LM34 // A0A1S3LM37 // A0A1S3QNW0 // A0A1S3QNW3 // B5X208 // B5X207 // B5X206 // B5X205 // B5X201 // A0A1S3Q7H3 // A0A1S3Q7H2 // A0A1S3T5G1 // A0A1S3S378 // C0H878 // …
GO:0070062	CC	extracellular vesicular exosome	9	636	1.41509	51	65384	0.0780007	18.1421	1.7e-09	6.1e-08	// B5DGE8 // B9EMS3 // C0HAL2 // B5X397 // B8YQA0 // B5DH02 // B5X1S6 // B5X127 // B5XAE0	// B5XEF8 // B5X9F8 // B5X1S6 // B5X3E3 // B5X3E2 // B8YQA0 // B5X393 // B5X7W3 // C0HBN0 // B5X794 // B5X137 // B5DGE8 // C0HAI2 // B5X1Q9 // B5DG68 // B5X7S6 // B5X3Q1 // B5X431 // B5X4K4 // C0H7X9 // Q5K595 // B5X397 // B5XFY1 // B9EMS3 // B9EMH1 // B5X4C7 // C0H815 // B5XEI6 // Q9DDK2 // B5XCQ9 // B5X2X6 // B9ENP4 // B5X8S5 // B5XA62 // B5XGC1 // B5X127 // C0H8F9 // B9EN47 // B5X2M8 // B5X1I3…
GO:0043230	CC	extracellular organelle	9	636	1.41509	51	65384	0.0780007	18.1421	1.7e-09	6.1e-08	// B5DGE8 // B9EMS3 // C0HAL2 // B5X397 // B8YQA0 // B5DH02 // B5X1S6 // B5X127 // B5XAE0	// B5XEF8 // B5X9F8 // B5X1S6 // B5X3E3 // B5X3E2 // B8YQA0 // B5X393 // B5X7W3 // C0HBN0 // B5X794 // B5X137 // B5DGE8 // C0HAI2 // B5X1Q9 // B5DG68 // B5X7S6 // B5X3Q1 // B5X431 // B5X4K4 // C0H7X9 // Q5K595 // B5X397 // B5XFY1 // B9EMS3 // B9EMH1 // B5X4C7 // C0H815 // B5XEI6 // Q9DDK2 // B5XCQ9 // B5X2X6 // B9ENP4 // B5X8S5 // B5XA62 // B5XGC1 // B5X127 // C0H8F9 // B9EN47 // B5X2M8 // B5X1I3…
GO:0065010	CC	extracellular membrane-bounded organelle	9	636	1.41509	51	65384	0.0780007	18.1421	1.7e-09	6.1e-08	// B5DGE8 // B9EMS3 // C0HAL2 // B5X397 // B8YQA0 // B5DH02 // B5X1S6 // B5X127 // B5XAE0	// B5XEF8 // B5X9F8 // B5X1S6 // B5X3E3 // B5X3E2 // B8YQA0 // B5X393 // B5X7W3 // C0HBN0 // B5X794 // B5X137 // B5DGE8 // C0HAI2 // B5X1Q9 // B5DG68 // B5X7S6 // B5X3Q1 // B5X431 // B5X4K4 // C0H7X9 // Q5K595 // B5X397 // B5XFY1 // B9EMS3 // B9EMH1 // B5X4C7 // C0H815 // B5XEI6 // Q9DDK2 // B5XCQ9 // B5X2X6 // B9ENP4 // B5X8S5 // B5XA62 // B5XGC1 // B5X127 // C0H8F9 // B9EN47 // B5X2M8 // B5X1I3…
GO:0022624	CC	proteasome accessory complex	5	636	0.786164	36	65384	0.0550593	14.2785	2.6e-05	0.0006	// C0H8V2 // B9EP79 // B9ENH7 // B9EMK0 // B5DH24	// B5X8M1 // A0A1S3QZ04 // B9EPW1 // B9EQ84 // B5XE01 // B5XE06 // B9ELZ3 // B9EMK0 // C0H8V2 // B9ELT0 // B9ENH7 // B9ENB6 // B9EP79 // B9ENB1 // B5X8E2 // A0A1S3T1T4 // A0A1S3MPT7 // B5XAB2 // A0A1S3T355 // A0A1S3SAT7 // A0A1S3R8Z1 // A0A1S3NEZ9 // A0A1S3Q9A3 // A0A1S3MQ75 // B9EML6 // A0A1S3T3T5 // B9EQJ4 // A0A1S3NES1 // B5RI16 // B9EPF1 // B5X722 // B5X6E1 // A0A1S3S4T0 // B9EN67 // B5DH25 /…
GO:0015935	CC	small ribosomal subunit	7	636	1.10063	54	65384	0.082589	13.3266	1e-06	2.8e-05	// B5DGX5 // C0H7I9 // B5DGY4 // B5DGY6 // A7KIL2 // B5DGK9 // B5XEW6	// Q9YGQ0 // E0R869 // B5X8X7 // B5DGX5 // A7KIL2 // B5X2G7 // B5DGK9 // Q9DF27 // B5X9L6 // A0A1S3LP02 // B5DGL6 // C0H7T0 // A0A1S3RYR3 // A0A1S3QWC9 // A0A1S3S2B2 // A0A1S3RFY3 // A0A1S3LW35 // A0A1S3QU58 // B5DGA8 // B5X8A9 // B5XGL6 // C0H773 // A0A1S2X2U3 // E0R838 // A0A1S3M391 // B5DGX4 // B5X0Y8 // A0A1S3S9W5 // A0A1S3L111 // A0A1S3Q7X9 // C0H7I9 // C0H7K2 // B5DGY5 // B5DGY4 // B5DGY6 /…
GO:0033279	CC	ribosomal subunit	13	636	2.04403	108	65384	0.165178	12.3747	6.9e-11	3.6e-09	// B5DGX5 // C0H7I9 // B5DGV2 // A7KIL2 // B5XDA1 // B5X5W5 // B5DGK9 // B5DGV7 // B5X4H4 // B5DGY4 // B5DGY6 // B5XEW6 // B5X7R3	// A0A1S3NNF0 // B5X5W5 // B5DGK9 // A0A1S3QQU7 // B5X9J1 // A0A1S3S2B2 // B5XC12 // B5X599 // B5X6U7 // A0A1S3L111 // A0A1S3T723 // B5X0Y8 // A0A1S3NFD4 // A0A1S3Q7X9 // C0H7K2 // B5XDA1 // B5X369 // B5X6T4 // A0A1S3SE09 // B5RIB5 // B5XBE5 // B5DGD4 // B9EP20 // B5XEW6 // Q9YGQ0 // E0R869 // B5X7M0 // B5DGV2 // B5X8X7 // A7KIL2 // A0A1S3RYR3 // M4V3H3 // B5X8A9 // C0H773 // C0H7C9 // A0A1S2X2U3…
GO:0015934	CC	large ribosomal subunit	6	636	0.943396	54	65384	0.082589	11.4228	1.5e-05	0.00037	// B5DGV7 // B5DGV2 // B5XDA1 // B5X5W5 // B5X4H4 // B5X7R3	// A0A1S3PQI7 // B5DGV7 // B5X7M0 // B5DGV2 // A0A1S3NNF0 // B5X5W5 // A0A1S3LR35 // B5RIB5 // A0A1S3QQU7 // B5XAJ8 // B5X9J1 // B5DGV1 // B5DGW6 // M4V3H3 // B5XC12 // P24558 // B5XA79 // B5X4J9 // B5X599 // B5X6U7 // A0A1S3QVZ2 // C0H7C9 // A0A1S3T723 // C0H7C7 // B5XDG0 // A0A1S3NFD4 // B5XBQ2 // B5DGW7 // C0H8H2 // B5DGW4 // C0H8L1 // B5XDA1 // B5XEA3 // B5X369 // B5X6T4 // A0A1S3N8J1 // B5XA…
GO:0000502	CC	proteasome complex	18	636	2.83019	227	65384	0.34718	8.15194	2.2e-11	1.3e-09	// B5RI28 // B5XGI9 // C0H856 // B5X9I8 // B5DGV0 // B5X6N3 // B5XGP5 // B5X386 // B5XCG8 // B9EP79 // B5DGU9 // B5XD66 // B9EMK0 // B9ENH7 // C0H8V2 // B5DGU4 // B5DGU7 // B5DH24	// B5XG11 // B5XAV2 // B5X9V8 // B5XDF9 // Q9DE53 // B5X449 // B5X750 // Q9DE54 // B9EQJ4 // B5XBN2 // B5X5B1 // B5XG15 // A0A1S3KLM0 // C0PUI4 // A0A1S3NNN1 // A0A1S3NQV8 // B5XC13 // B5X916 // B5XAY5 // B5XA50 // Q9DD33 // A7KII5 // B5XBM2 // A7KII6 // B5XFW6 // A0A1S3RE36 // A0A1S3PYN0 // B5XGG8 // B5X768 // A0A1S3RCJ2 // B5XG29 // B5X8Y8 // A0A1S3Q6J9 // B5X8N6 // B5X5K2 // B5DGU9 // B5DGU8 /…
GO:0005840	CC	ribosome	43	636	6.76101	621	65384	0.949774	7.11854	1.7e-22	7.2e-20	// B5DGK7 // C0H7H1 // B9ELK0 // B5DGV2 // B5DGV3 // B5X7I1 // B5DGX5 // A7KIL2 // B5DGX3 // B5X8X3 // B5DGX1 // B5X771 // B5RI41 // B5DGG8 // C0H7G0 // B5X5W5 // B5X5S8 // C0H8G4 // C0H7M0 // B5XDP1 // B5X7R3 // C0H7C2 // B5XDA1 // B5X668 // C0H7I9 // B5DGY4 // B5DGW8 // B5XDA7 // B5DGV7 // B5DGK9 // B5XG35 // B5X9T1 // B5DGJ6 // B5DGJ7 // B5X6C3 // B5DGB4 // C0PU33 // B5X3Q6 // C0H7L0 // B5X4H4…	// B9EPU0 // B9EQB9 // C0H7J7 // A0A1S3N6S7 // B5XC98 // A0A1S3QZ96 // A0A1S3NNS5 // B5RI65 // B5XAL7 // B5X7S7 // B5XC90 // B5RI62 // C0H8C7 // B9EQ57 // B5X599 // B5X7J4 // C0H7M1 // C0H7M0 // B5DG02 // B5DG01 // B5X841 // B5X840 // C0H7M9 // A0A1S3MSB2 // B5DGL2 // B5DGL6 // A0A1S3R084 // B5DGL8 // B5X369 // B5XDP1 // A0A1S3Q485 // A0A1S3PV74 // A0A1S3RSI8 // A0A1S3LIE9 // C0H761 // B5XCV1 // …
GO:0005839	CC	proteasome core complex	7	636	1.10063	121	65384	0.185061	5.9474	0.0002	0.0037	// C0H856 // B5X6N3 // B5XGP5 // B5XCG8 // B5XGI9 // B5XD66 // B5DGU4	// B5XG11 // B5XAV2 // Q9DE53 // B5X750 // Q9DE54 // B5X5B1 // B5XG15 // A0A1S3KLM0 // A0A1S3KLM6 // A0A1S3NQV8 // B5XA59 // B5X916 // B5XAY5 // B5XA50 // Q9DD33 // A7KII5 // B5XGN5 // A7KII6 // B5XFW6 // A0A1S3PYN0 // B5XGG8 // B5X768 // B5XG29 // B5X8Y8 // B5X8N6 // B5DGU3 // B5DGU5 // B9EM89 // B9EML1 // B5X6T8 // B5XFE8 // B5RI58 // B5XCG8 // B9EM13 // B5XFB6 // B5XAG6 // B9EM90 // B5X619 // …
GO:0030529	CC	ribonucleoprotein complex	49	636	7.7044	899	65384	1.37495	5.60339	6.4e-21	9.6e-19	// B5DGK7 // C0H7H1 // B9ELK0 // B5DGV2 // B5DGV3 // B5X7I1 // B5DGX5 // A7KIL2 // B5DGX3 // B5X8X3 // B5DGX1 // B5X771 // B5RI41 // B9ENF4 // B5X0W4 // B5DGG8 // B9ENH4 // C0H7G0 // B5X5W5 // B5X5S8 // C0H8G4 // C0H7M0 // B5XDP1 // B5DGJ7 // C0H7C2 // B5XDA1 // B5X668 // C0H7I9 // B5DGY4 // B5DGW8 // B5XF07 // B5XDA7 // B5DG42 // B5DGV7 // B5DGK9 // B5XG35 // B5X9T1 // C0H9H4 // B5DGJ6 // B5X7R3…	// B9EPU0 // B9EQB9 // E0R886 // C0H7J7 // A0A1S3NX36 // A0A1S3N6S7 // B5XC90 // B5XC98 // C0HAZ6 // B5XE21 // A0A1S3NNS5 // A0A1S3R499 // B5XAL7 // B5X7S7 // A0A1S3SPI6 // B5XC93 // C0H8C7 // A0A1S3PT98 // B5XA57 // B5XA55 // B9EQ57 // B5XGF4 // B5X599 // A0A1S3P0A8 // B5X7J4 // C0H7M1 // C0H7M0 // B5DG02 // B5DG01 // B5X841 // B5X840 // C0H7M9 // B5XEV6 // A0A1S3MSB2 // B5DGL2 // B9EME3 // B5DG…
GO:0044445	CC	cytosolic part	7	636	1.10063	142	65384	0.217179	5.06785	0.00054	0.0086	// A7KIL2 // B5X5W5 // B5DGQ7 // C0H8L6 // B5XA06 // B5X4H4 // B5X7R3	// A0A1S3NBM8 // A0A1S3L4V4 // A0A1S3S419 // A0A1S3QPN8 // A0A1S3S414 // A0A1S3S412 // A0A1S3S1F2 // A0A1S3NA10 // A0A1S3R410 // B5XGF2 // A0A1S3L4F3 // A0A1S3R7V9 // B9EPE9 // C0PU61 // A0A1S3R7V5 // A0A1S3RAY6 // A0A1S3NFD4 // B5X681 // A0A1S3Q086 // A0A1S3LYU9 // B5X6T6 // B5XE30 // B5X6T9 // B5X2M8 // B5X7T9 // B5X9Z0 // B5DGD4 // A0A1S3MHB8 // A0A1S3R7W5 // B5X6E3 // A0A1S3RAZ1 // A0A1S3QR92…
GO:0044454	CC	nuclear chromosome part	7	636	1.10063	161	65384	0.246238	4.46978	0.0011	0.017	// B5X5R0 // C0HAR3 // C0HAN5 // B5X2S3 // C0H9U0 // B5X2W3 // B5X3S2	// A0A1S3Q888 // A0A1S3SB19 // A0A1S3RQL6 // C0HAR3 // A0A1S3SVU4 // A0A1S3R943 // A0A1S3KLJ7 // A0A1S3N735 // A0A1S3QTF9 // A0A1S3SDY6 // A0A1S3SBF6 // A0A1S3KXH2 // A0A1S3SHX4 // A0A1S3PCZ4 // A0A1S3NDR3 // A0A1S2X086 // A0A1S3PCZ3 // B5X3S2 // A0A1S3RQL9 // B5X2S3 // C0PU48 // A0A1S3SVV0 // A0A1S3SVV2 // A0A1S3KUK3 // A0A1S3N1V0 // A0A1S3RN22 // A0A1S3RQE4 // A0A1S3PX30 // A0A1S3SNW9 // A0A1S3…
GO:0000228	CC	nuclear chromosome	7	636	1.10063	168	65384	0.256944	4.28354	0.0014	0.021	// B5X5R0 // C0HAR3 // C0HAN5 // B5X2S3 // C0H9U0 // B5X2W3 // B5X3S2	// A0A1S3Q888 // A0A1S3SB19 // A0A1S3RQL6 // C0HAR3 // A0A1S3SVU4 // A0A1S3R943 // A0A1S3KLJ7 // A0A1S3N735 // A0A1S3QTF9 // A0A1S3SDY6 // A0A1S3SBF6 // A0A1S3KXH2 // A0A1S3SHX4 // A0A1S3PCZ4 // A0A1S3NDR3 // A0A1S2X086 // A0A1S3PCZ3 // B5X3S2 // A0A1S3RQL9 // B5X2S3 // C0PU48 // A0A1S3SVV0 // A0A1S3SVV2 // A0A1S3KUK3 // A0A1S3N1V0 // A0A1S3RN22 // A0A1S3RQE4 // A0A1S3PX30 // A0A1S3KYF9 // A0A1S3…
GO:0000785	CC	chromatin	7	636	1.10063	172	65384	0.263061	4.18393	0.0016	0.022	// B5X5R0 // B5DGS1 // B5XEY5 // B5X2S3 // C0H823 // B5X3S2 // P84408	// A0A1S3SB19 // A0A1S3L1K6 // A0A1S3RN35 // A0A1S3SVU4 // A0A1S3Q8L4 // B5X5B2 // A0A1S3R3V7 // A0A1S3KLJ7 // B5X351 // A0A1S3PDY5 // A0A1S3QTF9 // P84408 // A0A1S3SDY6 // A0A1S3SDY5 // A0A1S3RL79 // A0A1S3NDR1 // A0A1S3PDQ7 // A0A1S3NDR3 // A0A1S2X086 // A0A1S3NSF9 // A0A1S3R432 // B5X3S2 // A0A1S3PW83 // A0A1S3R0U0 // B5X2S3 // A0A1S3SVV0 // A0A1S3LM37 // Q8QGP2 // B9ENT8 // A0A1S3M7V8 // A0A1…
GO:0031988	CC	membrane-bounded vesicle	16	636	2.51572	508	65384	0.776948	3.23795	6e-05	0.0013	// B5DGE8 // B5X473 // B5X361 // B9EMS3 // C0HAL2 // B5X397 // B5X3S5 // B8YQA0 // B5DH02 // C0HAW4 // B5X5I1 // B5X186 // B5X1S6 // B5X127 // B5X3T4 // B5XAE0	// O93460 // A0A1S3RD27 // A0A1S3PEC8 // A0A1S3RNG4 // A0A1S3RG86 // B8YQA0 // A0A1S3KMG3 // A0A1S3RT65 // B5X7S6 // B5X127 // A0A1S3SZW0 // A0A1S3MNF6 // A0A1S3LZL1 // A0A1S3NSF3 // A0A1S3NSF1 // B5X361 // B5X5K5 // A0A1S3N9U2 // A0A1S3SWV3 // B5X208 // A0A1S3NEW7 // A0A1S3M9M5 // A0A1S3QKQ9 // A0A1S3REP0 // A0A1S3RGX4 // A0A1S3Q1K1 // A0A1S3M8G6 // A0A1S3Q4E7 // A0A1S3RLW5 // A0A1S3NST1 // A0A1…
GO:0031982	CC	vesicle	16	636	2.51572	524	65384	0.801419	3.13908	8.6e-05	0.0017	// B5DGE8 // B5X473 // B5X361 // B9EMS3 // C0HAL2 // B5X397 // B5X3S5 // B8YQA0 // B5DH02 // C0HAW4 // B5X5I1 // B5X186 // B5X1S6 // B5X127 // B5X3T4 // B5XAE0	// O93460 // A0A1S3RD27 // A0A1S3PEC8 // A0A1S3RNG4 // A0A1S3RG86 // B8YQA0 // A0A1S3KMG3 // A0A1S3QC32 // A0A1S3RT65 // B5X7S6 // B5X127 // A0A1S3SZW0 // A0A1S3MNF6 // A0A1S3LZL1 // A0A1S3NSF3 // A0A1S3NSF1 // B5X361 // B5X5K5 // A0A1S3N9U2 // A0A1S3SWV3 // B5X208 // A0A1S3NEW7 // A0A1S3M9M5 // A0A1S3QKQ9 // A0A1S3REP0 // A0A1S3RGX4 // A0A1S3Q1K1 // A0A1S3M8G6 // A0A1S3Q4E7 // A0A1S3RLW5 // A0A1…
GO:0005829	CC	cytosol	10	636	1.57233	335	65384	0.512358	3.06881	0.002	0.026	// A7KIL2 // B5X2Z7 // B5X5W5 // C0H8L6 // B5DGQ7 // B5X4H4 // B5XA06 // B5X4K3 // C0H9L8 // B5X7R3	// B5X9U7 // B5X5E4 // A0A1S3NBM8 // A0A1S3L4V4 // B5XDG0 // B5XAK7 // A0A1S3S419 // A0A1S3KNQ1 // A0A1S3S414 // A0A1S3S412 // A0A1S3MDM2 // A0A1S3RTX7 // A0A1S3RTX6 // A0A1S3ST11 // A0A1S3KR66 // A0A1S3NA10 // A0A1S3T062 // A0A1S3T039 // C0H744 // A0A1S3KPH9 // A0A1S3KNI3 // A0A1S3S5Q1 // A0A1S3S5Q6 // C0PU61 // A0A1S3MDE2 // A0A1S3R410 // A0A1S3KYC4 // B5XGF2 // A0A1S3R145 // A0A1S3KPH4 // A0A1…
GO:0044427	CC	chromosomal part	11	636	1.72956	382	65384	0.584241	2.96035	0.0016	0.022	// B5X5R0 // B5DGS1 // C0HAR3 // C0HAN5 // B5XEY5 // B5X2S3 // C0H823 // C0H9U0 // B5X2W3 // B5X3S2 // P84408	// B9EPK8 // A0A1S3SVU4 // A0A1S3S656 // A0A1S3MGC1 // A0A1S3MNB7 // A0A1S3NNY5 // A0A1S3SU36 // A0A1S3KXH2 // A0A1S3SHX4 // A0A1S3Q977 // A0A1S3NDR1 // A0A1S3PDQ7 // A0A1S3NDR3 // A0A1S3NSF9 // B5X2S3 // A0A1S3LM37 // A0A1S3N1V0 // A0A1S3RN22 // A0A1S3RQE4 // A0A1S3LER8 // B5X5R0 // A0A1S3PFL3 // A0A1S3SHA9 // A0A1S3MVD8 // A0A1S3MX25 // A0A1S3MMV6 // A0A1S3T0Y4 // A0A1S3PAI0 // A0A1S3RN53 // C0…
GO:0005874	CC	microtubule	14	636	2.20126	514	65384	0.786125	2.80014	0.0007	0.011	// B5XFE9 // A7KJD9 // B5DH01 // B5DGE8 // C0HBL4 // B5X0U5 // Q2ERI0 // C0PU76 // B5DH02 // B9EMD3 // B9EN30 // C0H808 // B5X3H7 // C0HBJ2	// A0A1S3NL57 // A0A1S3P0J6 // O93460 // A0A1S3STF6 // A0A1S3R5W2 // A0A1S3Q6H7 // A0A1S3PLW1 // A0A1S3R717 // A0A1S3PD57 // B5X592 // A0A1S3QAD9 // A0A1S3Q505 // A0A1S3Q9E4 // A0A1S3R6V2 // A0A1S3LVB5 // A0A1S3LXS2 // A0A1S3M0R3 // A0A1S3LXS6 // A0A1S3KW65 // A0A1S3LWS9 // A0A1S3Q9K8 // A0A1S3NZ90 // A0A1S3PTI0 // B5XFE9 // A0A1S3NZH7 // A0A1S3NZH6 // A0A1S3NZH3 // A0A1S3LIE8 // A0A1S3QHY9 // A0…
GO:0043232	CC	intracellular non-membrane-bounded organelle	90	636	14.1509	3693	65384	5.64817	2.5054	1.6e-13	1.2e-11	// B5DGK7 // B5X9T1 // C0HAR3 // B5DGK9 // Q78BU2 // P84408 // C0H7M0 // B5X3S2 // C0PU76 // B5XDA1 // B5XDA7 // B5X2W3 // B9ELH2 // C0HB84 // B5RI77 // B5XFE9 // B5X5R0 // B5X2M3 // B5XEW6 // C0H7H1 // B5DGV7 // B5DGV2 // B5DGV3 // A7KIL2 // B5X8X3 // C0HAQ8 // B5DGE8 // B5X5S8 // B5XCW2 // B9EMD3 // B5X2S3 // C0H823 // B5XDP1 // C0H7C2 // B5X668 // C0H7I9 // B5DGW8 // B5XAM0 // C0H9H4 // B5X6C3…	// B9EPU0 // A0A1S3P0J6 // A0A1S3P0J5 // A0A1S3KK75 // A0A1S3SVU4 // A0A1S3RU04 // A0A1S3SPI8 // A0A1S3PLW1 // Q78BU2 // B5XC30 // A0A1S3R717 // A0A1S3SPI6 // A0A1S3R715 // A0A1S3SPI4 // A0A1S3RQS8 // A0A1S3MQR9 // B5X592 // A0A1S3KXH2 // A0A1S3PYC1 // B9EQ57 // B5X599 // A0A1S3SBN8 // A0A1S3N3P3 // B5X841 // B5X840 // A0A1S3LVB5 // A0A1S3MSB2 // A0A1S3PRU8 // A0A1S3P7T7 // A0A1S3M0R3 // A0A1S3PY…
GO:0043228	CC	non-membrane-bounded organelle	90	636	14.1509	3693	65384	5.64817	2.5054	1.6e-13	1.2e-11	// B5DGK7 // B5X9T1 // C0HAR3 // B5DGK9 // Q78BU2 // P84408 // C0H7M0 // B5X3S2 // C0PU76 // B5XDA1 // B5XDA7 // B5X2W3 // B9ELH2 // C0HB84 // B5RI77 // B5XFE9 // B5X5R0 // B5X2M3 // B5XEW6 // C0H7H1 // B5DGV7 // B5DGV2 // B5DGV3 // A7KIL2 // B5X8X3 // C0HAQ8 // B5DGE8 // B5X5S8 // B5XCW2 // B9EMD3 // B5X2S3 // C0H823 // B5XDP1 // C0H7C2 // B5X668 // C0H7I9 // B5DGW8 // B5XAM0 // C0H9H4 // B5X6C3…	// B9EPU0 // A0A1S3P0J6 // A0A1S3P0J5 // A0A1S3KK75 // A0A1S3SVU4 // A0A1S3RU04 // A0A1S3SPI8 // A0A1S3PLW1 // Q78BU2 // B5XC30 // A0A1S3R717 // A0A1S3SPI6 // A0A1S3R715 // A0A1S3SPI4 // A0A1S3RQS8 // A0A1S3MQR9 // B5X592 // A0A1S3KXH2 // A0A1S3PYC1 // B9EQ57 // B5X599 // A0A1S3SBN8 // A0A1S3N3P3 // B5X841 // B5X840 // A0A1S3LVB5 // A0A1S3MSB2 // A0A1S3PRU8 // A0A1S3P7T7 // A0A1S3M0R3 // A0A1S3PY…
GO:0005737	CC	cytoplasm	156	636	24.5283	6443	65384	9.85409	2.48915	7e-21	9.6e-19	// B5DGK7 // B5DGK9 // B5X3C0 // B5XE27 // Q78BU2 // C0HB95 // C0HAA0 // B5X152 // B5XFF0 // C0H9E7 // B5X3J8 // B5X7J7 // B5X186 // B5X1S6 // B5X473 // B5X361 // B5X8Y9 // C0H8Y3 // B5XDA7 // C0H8J4 // B5DGU4 // C0PU77 // B5XFE9 // B5XEN4 // B5XD08 // B9EM17 // B5X2M3 // B5X193 // C0H935 // B5X3T4 // B5XEW6 // C0HAC7 // C0H7H1 // B5XCG8 // B5DGM5 // B5DGV2 // C0HAC0 // B5X467 // A7KIL2 // B5X8X3…	// A0A1S3QDX6 // A0A1S3QL56 // A0A1S3L4V4 // A0A1S3PLW1 // A0A1S3S8M4 // A0A1S3S8M2 // A0A1S3KXH0 // C0H773 // A0A1S3LVB0 // C0H9S0 // A0A1S3LVB5 // A0A1S3S3L0 // A0A1S3LM30 // A0A1S3QNW3 // B5X8F3 // B5X208 // B5X207 // A0A1S3RDG3 // B5X8F8 // A0A1S3PTI0 // A0A1S3RSI8 // A0A1S3RSI3 // A0A1S3RSI2 // A0A1S3M8G6 // A0A1S3LWZ2 // A0A1S3R395 // A0A1S3S9A8 // A0A1S3S9A9 // A0A1S3S9A6 // A0A1S3S9A7 // …
GO:0044444	CC	cytoplasmic part	96	636	15.0943	4582	65384	7.00783	2.15392	9e-11	4.2e-09	// B5DGK7 // B5DGK9 // C0HB95 // B5XFF0 // C0H9E7 // C0H7M0 // B5X186 // B5X473 // B5X361 // B5X8Y9 // C0H8Y3 // B5XDA7 // C0H8J4 // C0PU77 // B5XEN4 // B5X2M3 // C0H935 // B5X3T4 // B5XEW6 // C0H7H1 // B5DGV7 // B5DGV2 // C0HAC0 // B5X467 // A7KIL2 // B5X8X3 // B5X8P4 // B5X5S8 // B5X152 // B5XAD3 // B5XDP1 // C0H7C2 // B5X668 // C0H7I9 // B5DGW8 // B5XA06 // B5X6C3 // B5X2Z7 // C0H8X3 // B5X4H4…	// B9EPU0 // A0A1S3L4V4 // B5X117 // A0A1S3QYD5 // B9EPU7 // B5DGJ3 // A0A1S3KK75 // B5X449 // A0A1S3QMW9 // A0A1S3T3E6 // A0A1S3N4I6 // A0A1S3SPI9 // A0A1S3SPI8 // A0A1S3PLW1 // B9EMQ1 // A0A1S3S5T4 // A0A1S3S2A6 // B5RI65 // B5RI66 // A0A1S3Q5Y7 // A0A1S3SPI6 // B5X9J4 // A0A1S3SPI4 // A0A1S3NTE2 // A0A1S3KXH0 // B5X591 // A0A1S3KJP9 // A0A1S3SF11 // A0A1S3KJP7 // A0A1S3SF13 // B9EQ57 // C0H773…
GO:0032991	CC	macromolecular complex	138	636	21.6981	6765	65384	10.3466	2.09713	1.7e-13	1.2e-11	// B5DGK7 // C0HAR3 // B5DGK9 // C0HBN2 // P84408 // B9ENF4 // B5X3J8 // C0H7M0 // B5X3S5 // B5X3S2 // B5X361 // B5XFE9 // B5XDA1 // B5XDA7 // B5DGU9 // C0HAB9 // B5X2W3 // C0H8J4 // B5DGU4 // B5DGU7 // C0PU77 // C0PU76 // Q0H918 // B5XCG8 // B5X2M3 // Q98TY5 // B5X3T4 // B5DH24 // C0H7H1 // B5DGV7 // B5DGV0 // B5DGV2 // C0HAC0 // B5X467 // B5X0U5 // A7KIL2 // B5X8X3 // C0H9X1 // B5X8P4 // B9EMK0…	// A0A1S3QDX6 // A0A1S3PLW1 // A0A1S3PLW3 // A0A1S3S8M1 // A0A1S3KXH5 // C0HBF6 // A0A1S3L0F4 // A0A1S3RKC7 // A0A1S3N7P1 // A0A1S3LVB0 // A0A1S3LQ97 // A0A1S3LVB6 // A0A1S3PRU8 // A0A1S3S3L4 // A0A1S3QNW5 // A0A1S3LM30 // C0H9F5 // A0A1S3PGH0 // A0A1S3RDG0 // A0A1S3PTI0 // B5XGH1 // A0A1S3RSI8 // A0A1S3RSI5 // A0A1S3RSI3 // A0A1S3LWZ2 // A0A1S3T5G5 // A0A1S3S378 // A0A1S3PZ33 // A0A1S3PZ34 // A0…
GO:0044424	CC	intracellular part	242	636	38.0503	15712	65384	24.0303	1.58343	2.2e-09	6.6e-08	// B5DGK7 // B5X1Z2 // C0HAR3 // B3SU94 // B5DGK9 // B5X3C0 // B5XE27 // Q0H918 // C0H8J4 // Q78BU2 // C0HB95 // C0HAA0 // P84408 // C0PUI6 // B5X152 // B5X911 // C0HAN5 // B5XFF0 // B9ENF4 // B5DGU4 // B5X3J8 // B5RIC3 // C0H7M0 // B5X3S9 // B5X186 // B5XFZ3 // B5X2S3 // B9ENT4 // B5X771 // B5X473 // B5X361 // B5XFE9 // C0H8Y3 // B5XDA7 // B5DGU9 // C0HAB9 // B5X1K2 // Q90Y22 // B5X2W3 // B9ELH2…	// A0A1S3QDX6 // A0A1S3M645 // A0A1S3QL53 // A0A1S3QL56 // A0A1S3L4V4 // A0A1S3PLW1 // A0A1S3S8M4 // A0A1S3S8M2 // A0A1S3KXH5 // A0A1S3RQS8 // A0A1S3KXH0 // C0HBF6 // A0A1S3KXH2 // A0A1S3L0F4 // A0A1S3MQR0 // A0A1S3RIG2 // A0A1S3QY19 // A0A1S3SKN5 // A0A1S3MF27 // A0A1S3KRM2 // A0A1S3LVB0 // A0A1S3LQ91 // B5X8U5 // A0A1S3LQ97 // A0A1S3MF29 // A0A1S3PRU8 // A0A1S3S3L0 // A0A1S3QNW5 // A0A1S3LM37 /…
GO:0005622	CC	intracellular	242	636	38.0503	15713	65384	24.0319	1.58333	2.2e-09	6.6e-08	// B5DGK7 // B5X1Z2 // C0HAR3 // B3SU94 // B5DGK9 // B5X3C0 // B5XE27 // Q0H918 // C0H8J4 // Q78BU2 // C0HB95 // C0HAA0 // P84408 // C0PUI6 // B5X152 // B5X911 // C0HAN5 // B5XFF0 // B9ENF4 // B5DGU4 // B5X3J8 // B5RIC3 // C0H7M0 // B5X3S9 // B5X186 // B5XFZ3 // B5X2S3 // B9ENT4 // B5X771 // B5X473 // B5X361 // B5XFE9 // C0H8Y3 // B5XDA7 // B5DGU9 // C0HAB9 // B5X1K2 // Q90Y22 // B5X2W3 // B9ELH2…	// A0A1S3QDX6 // A0A1S3M645 // A0A1S3QL53 // A0A1S3QL56 // A0A1S3L4V4 // A0A1S3PLW1 // A0A1S3S8M4 // A0A1S3S8M2 // A0A1S3KXH5 // A0A1S3RQS8 // A0A1S3KXH0 // C0HBF6 // A0A1S3KXH2 // A0A1S3L0F4 // A0A1S3MQR0 // A0A1S3RIG2 // A0A1S3QY19 // A0A1S3SKN5 // A0A1S3MF27 // A0A1S3KRM2 // A0A1S3LVB0 // A0A1S3LQ91 // B5X8U5 // A0A1S3LQ97 // A0A1S3MF29 // A0A1S3PRU8 // A0A1S3S3L0 // A0A1S3QNW5 // A0A1S3LM37 /…
GO:0043234	CC	protein complex	88	636	13.8365	5843	65384	8.93644	1.54832	0.00015	0.0028	// C0HAR3 // C0HBN2 // B5X3J8 // B5X3S5 // B5X3S2 // B5X361 // B5XFE9 // B5DGU9 // C0HAB9 // B5X2W3 // C0H8J4 // B5DGU4 // B5DGU7 // C0PU77 // C0PU76 // Q0H918 // B5XCG8 // B5X2M3 // Q98TY5 // B5X3T4 // B5DH24 // B5DGV0 // C0HAC0 // B5X467 // C0H9X1 // B5X8P4 // B9EMK0 // B5DGE8 // B5X3L0 // B5X152 // B5XCW2 // B5XAD3 // B9EMD3 // B5X2S3 // B5X386 // B5X9I8 // B5XA06 // B5XGP5 // Q2ERI0 // C0H896…	// A0A1S3QDX6 // A0A1S3PLW1 // A0A1S3PLW3 // A0A1S3S8M1 // A0A1S3KXH5 // C0HBF6 // A0A1S3L0F4 // A0A1S3N7P1 // A0A1S3LVB0 // A0A1S3LQ97 // A0A1S3LVB6 // A0A1S3PRU8 // A0A1S3S3L4 // A0A1S3QNW5 // A0A1S3LM30 // C0H9F5 // A0A1S3PGH0 // A0A1S3RDG0 // A0A1S3PTI0 // B5XGH1 // A0A1S3RSI5 // A0A1S3RSI3 // A0A1S3LWZ2 // A0A1S3T5G5 // A0A1S3S378 // A0A1S3PZ33 // A0A1S3PZ34 // A0A1S3L9T8 // A0A1S3MEA6 // A0…
GO:0044446	CC	intracellular organelle part	83	636	13.0503	5582	65384	8.53726	1.52863	0.00031	0.0054	// B5DGV7 // A7KJD9 // C0H8T5 // B5X3R3 // B5DGZ1 // C0HAR3 // A7KIL2 // B5DGK9 // Q2ERI0 // C0H9R0 // B5DGP4 // B5X9W9 // C0HBJ2 // B5X0U5 // C0HB95 // C0PUT3 // P84408 // C0HAQ8 // B5DGE8 // B5X3L0 // B5DGV2 // B5X7X4 // C0H980 // B5X5W5 // B5X1N7 // B9ENF4 // B5X3J8 // B5XCW2 // B5XAD3 // B9EMD3 // B5X2S3 // B5X5I1 // C0H808 // B5DG42 // B5X3H7 // B5X186 // B5XEW6 // B5X3S2 // B9EN30 // C0H9L3…	// A0A1S3QDX6 // A0A1S3PLW1 // A0A1S3S8M2 // A0A1S3KXH5 // A0A1S3MQR9 // C0HBF6 // A0A1S3KXH2 // A0A1S3RKC7 // A0A1S3LVB0 // A0A1S3LQ97 // A0A1S3LVB6 // A0A1S3PRU8 // A0A1S3QNW5 // A0A1S3LM37 // A0A1S3LM30 // A0A1S3QNW3 // C0H9F5 // B5X208 // B5X207 // A0A1S3RDG0 // A0A1S3PTI0 // B5XGH1 // A0A1S3RSI5 // A0A1S3RSI3 // A0A1S3LWZ2 // A0A1S3Q7H1 // A0A1S3T5G5 // B5X6J8 // A0A1S3S378 // A0A1S3PZ33 // …
GO:0044422	CC	organelle part	83	636	13.0503	5624	65384	8.60149	1.51722	0.00039	0.0064	// B5DGV7 // A7KJD9 // C0H8T5 // B5X3R3 // B5DGZ1 // C0HAR3 // A7KIL2 // B5DGK9 // Q2ERI0 // C0H9R0 // B5DGP4 // B5X9W9 // C0HBJ2 // B5X0U5 // C0HB95 // C0PUT3 // P84408 // C0HAQ8 // B5DGE8 // B5X3L0 // B5DGV2 // B5X7X4 // C0H980 // B5X5W5 // B5X1N7 // B9ENF4 // B5X3J8 // B5XCW2 // B5XAD3 // B9EMD3 // B5X2S3 // B5X5I1 // C0H808 // B5DG42 // B5X3H7 // B5X186 // B5XEW6 // B5X3S2 // B9EN30 // C0H9L3…	// A0A1S3QDX6 // A0A1S3PLW1 // A0A1S3S8M2 // A0A1S3KXH5 // A0A1S3MQR9 // C0HBF6 // A0A1S3KXH2 // A0A1S3L0F4 // A0A1S3RKC7 // A0A1S3LVB0 // A0A1S3LQ97 // A0A1S3LVB6 // A0A1S3PRU8 // A0A1S3QNW5 // A0A1S3LM37 // A0A1S3LM30 // A0A1S3QNW3 // C0H9F5 // B5X208 // B5X207 // A0A1S3RDG0 // A0A1S3PTI0 // B5XGH1 // A0A1S3RSI5 // A0A1S3RSI3 // A0A1S3LWZ2 // A0A1S3Q7H1 // A0A1S3T5G5 // B5X6J8 // A0A1S3S378 // …
GO:0043226	CC	organelle	191	636	30.0314	13626	65384	20.84	1.44105	9.7e-06	0.00025	// B5DGK7 // C0HAR3 // B3SU94 // B8YQA0 // B5DGK9 // B5XD08 // Q0H918 // Q78BU2 // C0HB95 // P84408 // C0PUI6 // B5X911 // B5XFF0 // B9ENF4 // B5DGU4 // B5X3J8 // B5X7J7 // B5X3S9 // B5X186 // B5XFZ3 // B5X2S3 // B9ENT4 // B5X771 // B5X473 // B5X361 // B5XFE9 // C0H8Y3 // B5XDA7 // B5X1K2 // Q90Y22 // B5X2W3 // B9ELH2 // C0HB84 // B5RI77 // Q98TV7 // C0PU77 // C0PU76 // C0HAU7 // B5XEN4 // B5X5R0…	// A0A1S3QDX6 // A0A1S3M645 // A0A1S3QL53 // A0A1S3L4V4 // A0A1S3PLW1 // A0A1S3PJM7 // A0A1S3S8M2 // A0A1S3KXH5 // A0A1S3RQS8 // A0A1S3KXH0 // C0HBF6 // A0A1S3KXH2 // A0A1S3L0F4 // A0A1S3MQR0 // A0A1S3QY19 // A0A1S3MF27 // A0A1S3KRM2 // A0A1S3LVB0 // A0A1S3LQ91 // B5XDN0 // A0A1S3LQ97 // A0A1S3MF29 // A0A1S3PRU8 // A0A1S3QNW5 // A0A1S3LM37 // A0A1S3LM30 // A0A1S3QNW3 // B5X8F3 // C0H9F5 // C0H9F0…
GO:0043229	CC	intracellular organelle	184	636	28.9308	13583	65384	20.7742	1.39263	6.6e-05	0.0014	// B5DGK7 // C0HAR3 // B3SU94 // B5DGK9 // B5XD08 // Q0H918 // Q78BU2 // C0HB95 // P84408 // C0PUI6 // B5X911 // B5XFF0 // B9ENF4 // B5DGU4 // B5X3J8 // B5X7J7 // B5X3S9 // B5X186 // B5XFZ3 // B5X2S3 // B9ENT4 // B5X771 // B5X473 // B5X361 // B5XFE9 // C0H8Y3 // B5XDA7 // B5X1K2 // Q90Y22 // B5X2W3 // B9ELH2 // C0HB84 // B5RI77 // Q98TV7 // C0PU77 // C0PU76 // C0HAU7 // B5XEN4 // B5X5R0 // B5XCG8…	// A0A1S3QDX6 // A0A1S3M645 // A0A1S3QL53 // A0A1S3L4V4 // A0A1S3PLW1 // A0A1S3PJM7 // A0A1S3S8M2 // A0A1S3KXH5 // A0A1S3RQS8 // A0A1S3KXH0 // C0HBF6 // A0A1S3KXH2 // A0A1S3L0F4 // A0A1S3MQR0 // A0A1S3QY19 // A0A1S3MF27 // A0A1S3KRM2 // A0A1S3LVB0 // A0A1S3LQ91 // B5XDN0 // A0A1S3LQ97 // A0A1S3MF29 // A0A1S3PRU8 // A0A1S3QNW5 // A0A1S3LM37 // A0A1S3LM30 // A0A1S3QNW3 // B5X8F3 // C0H9F5 // C0H9F0…
GO:0005200	MF	structural constituent of cytoskeleton	12	636	1.88679	105	65384	0.16059	11.7491	6.7e-10	1e-07	// C0PU76 // A7KJD9 // B5XFE9 // B5DGE8 // B5X0U5 // Q2ERI0 // B5DH01 // B5DH02 // B9EN30 // C0H808 // B5X3H7 // C0HBL4	// A0A1S3LU97 // A0A1S3L0N8 // A0A1S3P0J6 // A0A1S3KYB2 // A0A1S3LME8 // B9EMM4 // A0A1S3SZ40 // A0A1S3REW2 // A0A1S3MB10 // A0A1S3PES9 // A0A1S3L112 // A0A1S3PES7 // C0PU76 // A0A1S3RJ34 // A0A1S3RJ33 // A0A1S3NQ56 // B5XFE9 // A0A1S3MAJ2 // A0A1S3KVT5 // A0A1S3RCE4 // A7KIJ4 // A0A1S3MQY2 // A0A1S3MHP9 // A0A1S3RJ29 // A0A1S3P0L0 // A0A1S3LAS3 // A0A1S3L0S3 // A0A1S3P0L9 // A0A1S3N4F3 // A0A1S3…
GO:0051082	MF	unfolded protein binding	15	636	2.35849	140	65384	0.21412	11.0148	1.3e-11	2.8e-09	// B5DG64 // B9EMS3 // U5KQ14 // C0HAF8 // Q0KFS6 // B5RI17 // B5X4M2 // B5X1Z2 // Q9W6K6 // U5KR11 // C0HA30 // C0PUU5 // U5KQM7 // C0HBB4 // C0HAB6	// A0A1S3NS46 // A0A1S3RRD2 // A0A1S3QPN8 // A0A1S3LG94 // A0A1S3MN98 // A0A1S3QKA6 // A0A1S3L7N1 // A0A1S3SWX8 // B9EPE9 // A0A1S3LHD8 // B5XBF7 // C0HBK7 // B5X685 // A0A1S3MP94 // B5X207 // A0A1S3T539 // A0A1S3LI86 // C0HAB6 // A0A1S3QID6 // B5X2M8 // B5X7T9 // B5X9Z0 // A0A1S3MHB8 // A0A1S3KQ60 // A0A1S3S1N7 // A0A1S3M181 // A0A1S3L4C5 // A0A1S3QB94 // A0A1S3KXV0 // A0A1S3QZZ7 // A0A1S3RTF3 /…
GO:0003678	MF	DNA helicase activity	6	636	0.943396	56	65384	0.0856479	11.0148	1.9e-05	0.00063	// B5X1K2 // C0HAR3 // C0HAN5 // C0H9U0 // B5X2W3 // B5X3S2	// A0A1S3LXE0 // C0HAG8 // A0A1S3T3B7 // A0A1S3QZA8 // A0A1S3LZC7 // A0A1S3NRR4 // A0A1S3LZP6 // B5XDZ4 // B5X1Q2 // A0A1S3R3Z4 // A0A1S3N040 // A0A1S3P4V6 // A0A1S3MEH5 // A0A1S3SGA9 // A0A1S3NGI6 // A0A1S3RHE4 // A0A1S3RQL6 // A0A1S3SXB0 // A0A1S3MF69 // A0A1S3KNZ2 // A0A1S3QZM4 // B5X2W3 // A0A1S3KJG4 // B5X3S2 // A0A1S3RQL9 // B5X105 // A0A1S3KQ76 // C0HAR3 // A0A1S3LYF9 // A0A1S3SFD5 // A0A1…
GO:0003735	MF	structural constituent of ribosome	40	636	6.28931	486	65384	0.743301	8.46132	8.8e-24	5.4e-21	// B5DGK7 // C0H7H1 // B9ELK0 // B5DGV2 // B5DGV3 // B5X7I1 // B5DGX5 // A7KIL2 // B5DGX3 // B5X8X3 // B5DGX1 // B5X771 // B5RI41 // B5DGG8 // C0H7G0 // B5X5W5 // B5X5S8 // B5XG35 // C0H7M0 // B5X7R3 // C0H7C2 // B5XDA1 // B5X668 // C0H7I9 // B5DGY4 // B5DGW8 // B5XDA7 // B5DGV7 // B5DGK9 // B5X9T1 // B5DGJ6 // B5DGJ7 // B5DGB4 // C0PU33 // B5X3Q6 // C0H7L0 // B5X4H4 // B5RI93 // B5DGY6 // B5XEW6	// B9EPU0 // B9EQB9 // C0H7J7 // A0A1S3N6S7 // B5XC98 // B5RI65 // B5X9J1 // B5X7S7 // B5RI62 // C0H8C7 // B9EQ57 // B5X599 // B5X7J4 // C0H7M1 // C0H7M0 // B5DG02 // B5DG01 // B5X841 // B5X840 // C0H7M9 // A0A1S3MSB2 // B5DGL2 // B5DGL6 // A0A1S3R084 // B5DGL8 // B5X369 // A0A1S3RYQ8 // A0A1S3Q485 // A0A1S3PV74 // A0A1S3RSI8 // A0A1S3LIE9 // B5XCV1 // B9EP20 // B5DH21 // B5DH20 // B5X9S4 // B5XF…
GO:0005544	MF	calcium-dependent phospholipid binding	8	636	1.25786	100	65384	0.152943	8.2244	7e-06	0.00027	// B5XCU8 // B5X1G1 // B5X865 // B5RI22 // B5X1W5 // B5X999 // B5XCE7 // B5XAE0	// A0A1S3PUV4 // A0A1S3PH49 // A0A1S3N085 // A0A1S3PW64 // A0A1S3LPK1 // A0A1S3M8N6 // A0A1S3MM94 // A0A1S3RSS7 // A0A1S3M7G8 // B5X999 // A0A1S3N0R6 // A0A1S3PUW0 // A0A1S3PZE0 // A0A1S3PDX9 // B5XBM7 // B5X1X1 // A0A1S3MMA0 // A0A1S3NM97 // A0A1S3KQ66 // A0A1S3Q9B1 // A0A1S3ML75 // A0A1S3QIJ7 // A0A1S3T2N8 // A0A1S3L6C5 // B5X865 // A0A1S3LLN0 // A0A1S3PZL4 // A0A1S3QHR9 // A0A1S3P1K3 // A0A1S3…
GO:0019205	MF	nucleobase, nucleoside, nucleotide kinase activity	7	636	1.10063	105	65384	0.16059	6.85367	8.4e-05	0.0022	// B5XCJ8 // B5DGM5 // B5DGC6 // B5XCA1 // C0H8Q7 // B5XCD3 // C0PUV7	// A0A1S3LYT1 // A0A1S3S795 // A0A1S3LI38 // A0A1S3R5N6 // A0A1S3L4I9 // A0A1S3KJA5 // A0A1S3RDQ1 // A0A1S3QSY0 // A0A1S3PZF2 // A0A1S3P9N1 // A0A1S3R5J6 // A0A1S3MG06 // B5DGC6 // A0A1S3KJP4 // B5XCD3 // A0A1S3RT52 // A0A1S3LZ09 // A0A1S3LUK2 // B5X3S3 // B5XAW0 // B5XF49 // A0A1S3NNA2 // C0H8Q7 // A0A1S3SBG2 // A0A1S3PTI2 // A0A1S3LTE0 // A0A1S3SBG4 // B5XC23 // A0A1S3PB19 // B5XC27 // B5DGM5 /…
GO:0016860	MF	intramolecular oxidoreductase activity	5	636	0.786164	77	65384	0.117766	6.67565	0.00098	0.015	// D0QEL0 // B5DGL3 // B5XA86 // B5X1H7 // C0PU58	// A0A1S3QF86 // A0A1S3M5J5 // A0A1S3R1M3 // A0A1S3MXN3 // A0A1S3LT56 // A0A1S3NCU0 // A0A1S3MTQ5 // A0A1S3LAF4 // A0A1S3R491 // A0A1S3QX20 // B5XB51 // B5XD43 // B5X4S3 // A0A1S3L6Z8 // A0A1S3MWE5 // A0A1S3P4R2 // C0H9M4 // B5XB10 // A0A1S3NFY1 // A0A1S3RQQ8 // A0A1S3MWA7 // B5DGL3 // A0A1S3NBY7 // A0A1S3PHS4 // B5XGF1 // B5X1H7 // A0A1S3PHQ7 // A0A1S3MSJ8 // A0A1S3PZN5 // A0A1S3QAY5 // B5X2D1 /…
GO:0003746	MF	translation elongation factor activity	9	636	1.41509	144	65384	0.220237	6.42531	1.4e-05	0.00052	// C0HBS1 // C0HAL2 // B5X6L3 // C0H9C3 // C0HBD9 // B5X8P4 // C0H7V4 // B5RI37 // B5XFY9	// A0A1S3PHF9 // A0A1S3PWA0 // C0PTZ4 // B9EL07 // B9EMV4 // A0A1S3QRF1 // B5XA53 // A0A1S3PAU2 // B5X9E6 // B9EMD4 // B5X996 // A0A1S3MLQ7 // A0A1S3KWH4 // A0A1S3Q8C1 // A0A1S3RGG1 // A0A1S3NTM5 // A0A1S3M0R0 // B9ENT5 // B5X9R1 // B9ENT0 // A0A1S3T5F4 // B5X6L3 // C0H9N2 // A0A1S3P4S9 // A0A1S3M0P6 // B5X6T0 // A0A1S3PCH6 // A0A1S3KXI6 // B5X201 // B5X727 // A0A1S3KWP4 // B9ELG6 // A0A1S3P605 /…
GO:0004298	MF	threonine-type endopeptidase activity	7	636	1.10063	113	65384	0.172825	6.36845	0.00013	0.0028	// C0H856 // B5X6N3 // B5XGP5 // B5XCG8 // B5XGI9 // B5XD66 // B5DGU4	// B5XG11 // B5XAV2 // Q9DE53 // Q9DE54 // B5X5B1 // B5XG15 // A0A1S3KLM0 // A0A1S3KLM6 // A0A1S3NQV8 // B5XA59 // B5X916 // B5XAY5 // B5XA50 // Q9DD33 // A7KII5 // B5XGN5 // A7KII6 // B5XFW6 // B5XGG8 // B5X768 // B5XG29 // B5X8Y8 // B5X8N6 // B5DGU3 // B5DGU5 // B9EM89 // B9EML1 // B5X6T8 // B5XFE8 // B5RI58 // B5XCG8 // B9EM13 // B5XFB6 // B5XAG6 // B9EM90 // B5X619 // A0A1S3M187 // A0A1S3QXH3…
[truncated: 38 more rows]

## Sheet: SHK1.Vacuolization.vs.Control
GO_acc	term_type	Term	OVER/UNDER-represented	queryitem	querytotal	%query	refitem	reftotal	%reference	fold-enrichment	pvalue	FDR	entries	entries_ref
[truncated: 149 more rows]

## Sheet: SHK1.Propagation.vs.Control
GO_acc	term_type	Term	OVER/UNDER-represented	queryitem	querytotal	%query	refitem	reftotal	%reference	fold-enrichment	pvalue	FDR	entries	entries_ref
[truncated: 87 more rows]

## Sheet: SHK1.Propagation.vs.Vacuolizat
GO_acc	term_type	Term	OVER/UNDER-represented	queryitem	querytotal	%query	refitem	reftotal	%reference	fold-enrichment	pvalue	FDR	entries	entries_ref
[truncated: 107 more rows]
