# Supplementary material for: Global Proteomic Profiling of <em>Piscirickettsia</em> <em>Salmonis</em> and Salmon Macrophage-Like Cells during Intracellular Infection
Source: Preprints.org preprint supplement (doi:10.20944/preprints202009.0106.v1), 2020-09-04
Supplement: Supplementary file 2 [file Figure S1.docx]

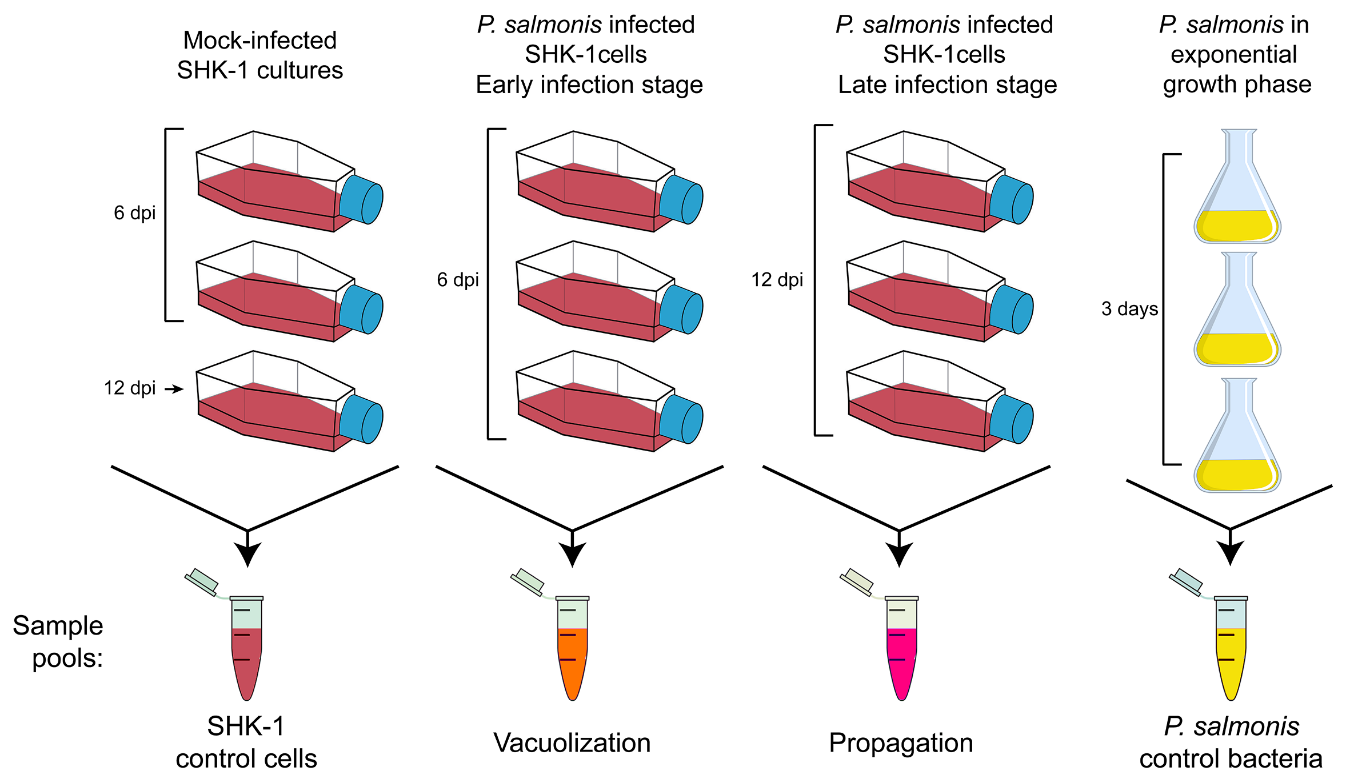


**Figure S1.** Schematic representation of sample pools obtained for global proteomic profiling of *P. salmonis* infections in SHK-1 cultures. Mock and *P. salmonis* infected SHK-1 cells were collected at early (6 days post-infection, vacuolization) and late (12 days post-infection, propagation) infection stages. *P. salmonis* grown in nutrient broth in exponential-growth phase was use as bacterial control.
