# Supplementary material for: Global Proteomic Profiling of <em>Piscirickettsia</em> <em>Salmonis</em> and Salmon Macrophage-Like Cells during Intracellular Infection
Source: Preprints.org preprint supplement (doi:10.20944/preprints202009.0106.v1), 2020-09-04
Supplement: Supplementary file 3 [file Table S1.xlsx]

## Sheet: P.sal control
Protein Name	gene name	description	E-value	Intensity	Coverage (%)	up_os	up_oc	ncbi_taxid	locus tag	Type	Description GenBank	nr description	COG letter	VFDB desc	VF family
A0A0J1J8S7	rpsF	30S ribosomal protein S6	-14.793	7.76779	20.3704	Piscirickettsia salmonis LF-89 = ATCC VR-1361.	Bacteria; Proteobacteria; Gammaproteobacteria; Thiotrichales;Piscirickettsiaceae; Piscirickettsia.	1227812	PSLF89_06495	chromosome	30S ribosomal protein S6	30S ribosomal protein S6 [Piscirickettsia salmonis]_x0001_gb|KGP98621.1| 30S ribosomal protein S6 [Piscirickettsia salmonis]	J
U4TG25	rplV	50S ribosomal protein L22	-38.7772	7.72318	19.0909	Piscirickettsia salmonis LF-89 = ATCC VR-1361.	Bacteria; Proteobacteria; Gammaproteobacteria; Thiotrichales;Piscirickettsiaceae; Piscirickettsia.	1227812	PSLF89_07680	chromosome	50S ribosomal protein L22	50S ribosomal protein L22 [Piscirickettsia salmonis]_x0001_gb|ERL63119.1| ribosomal protein L22 [Piscirickettsia salmonis LF-89 = ATCC VR-1361]_x0001_gb|KGP96670.1| 50S ribosomal protein L22 [Piscirickettsia salmonis]_x0001_gb|KGP99362.1| 50S ribosomal protein L22 [Piscirickettsia salmonis]	J
A0A0H4R527	PSLF89_1p198	Uncharacterized protein	-6.72125	7.29286	16	Piscirickettsia salmonis LF-89 = ATCC VR-1361.	Bacteria; Proteobacteria; Gammaproteobacteria; Thiotrichales;Piscirickettsiaceae; Piscirickettsia.	1227812	PSLF89_08585	pPSLF89-1	hypothetical protein	hypothetical protein [Piscirickettsia salmonis]_x0001_gb|KGP97361.1| Crp/Fnr family transcriptional regulator [Piscirickettsia salmonis]	No orthologs found
A0A0J1JFR6	AB894_00815	Uncharacterized protein	-9.86253	6.95042	7.40741	Piscirickettsia salmonis LF-89 = ATCC VR-1361.	Bacteria; Proteobacteria; Gammaproteobacteria; Thiotrichales;Piscirickettsiaceae; Piscirickettsia.	1227812	PSLF89_09190	pPSLF89-4	hypothetical protein	hypothetical protein [Piscirickettsia salmonis]	U
A0A0J1JFS2	AB894_00850	Uncharacterized protein	-13.009	7.35148	5.15021	Piscirickettsia salmonis LF-89 = ATCC VR-1361.	Bacteria; Proteobacteria; Gammaproteobacteria; Thiotrichales;Piscirickettsiaceae; Piscirickettsia.	1227812	PSLF89_09225	pPSLF89-4	hypothetical protein	hypothetical protein [Piscirickettsia salmonis]_x0001_gb|KGP93619.1| phosphoglycolate phosphatase [Piscirickettsia salmonis]	C
A0A0H4QZ60	PSLF89_1003	Repressor protein C2	-11.7111	7.26725	5.38117	Piscirickettsia salmonis LF-89 = ATCC VR-1361.	Bacteria; Proteobacteria; Gammaproteobacteria; Thiotrichales;Piscirickettsiaceae; Piscirickettsia.	1227812	PSLF89_1003	chromosome	peptidase S24	peptidase S24-like family protein [Piscirickettsia salmonis]_x0001_gb|ERL62679.1| peptidase S24-like family protein [Piscirickettsia salmonis LF-89= ATCC VR-1361]	KT
A0A0H4QX30	trpE	Chorismate-binding protein	-12.6073	6.91259	3.68098	Piscirickettsia salmonis LF-89 = ATCC VR-1361.	Bacteria; Proteobacteria; Gammaproteobacteria; Thiotrichales;Piscirickettsiaceae; Piscirickettsia.	1227812	PSLF89_102	chromosome	chorismate-binding protein	hypothetical protein [Piscirickettsia salmonis]_x0001_gb|KGP97516.1| chorismate binding enzyme family protein [Piscirickettsia salmonis]	EH	(gi:41408303) mbtI (MAP2205c) - anthranilate synthase component I [Mycobacterium avium str. K-10 (subsp. paratuberculosis)]	Adhesins, adherence and adhesion-related proteins
A0A0J1JCM1	tkt	Transketolase	-112.93	8.55513	18.5907	Piscirickettsia salmonis LF-89 = ATCC VR-1361.	Bacteria; Proteobacteria; Gammaproteobacteria; Thiotrichales;Piscirickettsiaceae; Piscirickettsia.	1227812	PSLF89_1024	chromosome	transketolase	hypothetical protein [Piscirickettsia salmonis]_x0001_gb|KGP97591.1| transketolase [Piscirickettsia salmonis]	G
A0A0J1M2Q0	gapA	Glyceraldehyde-3-phosphate dehydrogenase	-308.371	8.87081	38.209	Piscirickettsia salmonis LF-89 = ATCC VR-1361.	Bacteria; Proteobacteria; Gammaproteobacteria; Thiotrichales;Piscirickettsiaceae; Piscirickettsia.	1227812	PSLF89_1025	chromosome	glyceraldehyde-3-phosphate dehydrogenase	glyceraldehyde-3-phosphate dehydrogenase [Piscirickettsia salmonis]_x0001_gb|KGP97590.1| glyceraldehyde-3-phosphate dehydrogenase [Piscirickettsia salmonis]	G	(gi:15674453) plr/gapA (SPy0274) - glyceraldehyde-3-phosphate dehydrogenase [Streptococcus pyogenes str. SF370 (serotype M1)]	Adhesins, adherence and adhesion-related proteins
A0A0H4R1J7	pgk	Phosphoglycerate kinase	-54.8385	8.01145	21.8274	Piscirickettsia salmonis LF-89 = ATCC VR-1361.	Bacteria; Proteobacteria; Gammaproteobacteria; Thiotrichales;Piscirickettsiaceae; Piscirickettsia.	1227812	PSLF89_1026	chromosome	phosphoglycerate kinase	phosphoglycerate kinase [Piscirickettsia salmonis]_x0001_gb|KGP97589.1| phosphoglycerate kinase [Piscirickettsia salmonis]	G
U4TH08	pyk	Pyruvate kinase	-16.1987	7.5787	2.73684	Piscirickettsia salmonis LF-89 = ATCC VR-1361.	Bacteria; Proteobacteria; Gammaproteobacteria; Thiotrichales;Piscirickettsiaceae; Piscirickettsia.	1227812	PSLF89_1027	chromosome	pyruvate kinase	hypothetical protein [Piscirickettsia salmonis]_x0001_gb|KGP97588.1| pyruvate kinase [Piscirickettsia salmonis]	G
A0A0J1JCE5	fda	Fructose-bisphosphate aldolase, class II, Calvin cycle subtype	-76.2901	8.47849	22.029	Piscirickettsia salmonis LF-89 = ATCC VR-1361.	Bacteria; Proteobacteria; Gammaproteobacteria; Thiotrichales;Piscirickettsiaceae; Piscirickettsia.	1227812	PSLF89_1028	chromosome	fructose-1,6-bisphosphate aldolase	fructose-bisphosphate aldolase [Piscirickettsia salmonis]_x0001_gb|KGP97587.1| fructose-bisphosphate aldolase [Piscirickettsia salmonis]	G
A0A0J1JFZ6	AB894_00085	SAM-dependent methyltransferase	-12.4273	7.3888	8.63636	Piscirickettsia salmonis LF-89 = ATCC VR-1361.	Bacteria; Proteobacteria; Gammaproteobacteria; Thiotrichales;Piscirickettsiaceae; Piscirickettsia.	1227812	PSLF89_1044	chromosome	SAM-dependent methyltransferase	hypothetical protein [Piscirickettsia salmonis]_x0001_gb|KGP95769.1| O-methyltransferase family protein [Piscirickettsia salmonis]	R
A0A0J1M619	AB894_00135	Peptide chain release factor 2	-5.46149	7.62965	9.55631	Piscirickettsia salmonis LF-89 = ATCC VR-1361.	Bacteria; Proteobacteria; Gammaproteobacteria; Thiotrichales;Piscirickettsiaceae; Piscirickettsia.	1227812	PSLF89_1060	chromosome	peptide chain release factor 2	peptide chain release factor 2 [Piscirickettsia salmonis]	J
U4TAX6	lysS	Lysine--tRNA ligase	-8.98265	7.09245	2.34375	Piscirickettsia salmonis LF-89 = ATCC VR-1361.	Bacteria; Proteobacteria; Gammaproteobacteria; Thiotrichales;Piscirickettsiaceae; Piscirickettsia.	1227812	PSLF89_1061	chromosome	lysine--tRNA ligase	hypothetical protein [Piscirickettsia salmonis]_x0001_gb|KGP95781.1| lysine--tRNA ligase [Piscirickettsia salmonis]	J
U4TKH8	pfp	Pyrophosphate--fructose 6-phosphate 1-phosphotransferase	-14.0525	7.02343	7.87589	Piscirickettsia salmonis LF-89 = ATCC VR-1361.	Bacteria; Proteobacteria; Gammaproteobacteria; Thiotrichales;Piscirickettsiaceae; Piscirickettsia.	1227812	PSLF89_1090	chromosome	6-phosphofructokinase	hypothetical protein [Piscirickettsia salmonis]_x0001_gb|KGP95745.1| pyrophosphate-dependent phosphofructokinase [Piscirickettsia salmonis]	G
U4TFJ2	K661_01472	Uncharacterized protein	-4.05562	7.41018	14.0351	Piscirickettsia salmonis LF-89 = ATCC VR-1361.	Bacteria; Proteobacteria; Gammaproteobacteria; Thiotrichales;Piscirickettsiaceae; Piscirickettsia.	1227812	PSLF89_1099	chromosome	hypothetical protein	hypothetical protein [Piscirickettsia salmonis]_x0001_gb|KGP96114.1| hypothetical protein KU39_01961 [Piscirickettsia salmonis]	No orthologs found
A0A0J1JDS4	AB894_04300	Cell division protein BolA	-8.20695	6.30964	19.5402	Piscirickettsia salmonis LF-89 = ATCC VR-1361.	Bacteria; Proteobacteria; Gammaproteobacteria; Thiotrichales;Piscirickettsiaceae; Piscirickettsia.	1227812	PSLF89_1103	chromosome	cell division protein BolA	hypothetical protein [Piscirickettsia salmonis]_x0001_gb|KGP96110.1| bolA-like family protein [Piscirickettsia salmonis]	T
U4TMF7	tyrS	Tyrosine--tRNA ligase	-4.95926	7.32082	6.53266	Piscirickettsia salmonis LF-89 = ATCC VR-1361.	Bacteria; Proteobacteria; Gammaproteobacteria; Thiotrichales;Piscirickettsiaceae; Piscirickettsia.	1227812	PSLF89_1114	chromosome	tyrosine--tRNA ligase	tyrosyl-tRNA synthetase [Piscirickettsia salmonis]_x0001_gb|KGP96099.1| tyrosine--tRNA ligase [Piscirickettsia salmonis]	J
A0A0J1JBX1	ORFNames=AB894_07770, PSLF89_114	Uncharacterized protein	-11.9023	7.43043	17.2043	Piscirickettsia salmonis LF-89 = ATCC VR-1361.	Bacteria; Proteobacteria; Gammaproteobacteria; Thiotrichales;Piscirickettsiaceae; Piscirickettsia.	1227812	PSLF89_114	chromosome	hypothetical protein	hypothetical protein [Piscirickettsia salmonis]_x0001_gb|KGP97528.1| membrane fusogenic activity family protein [Piscirickettsia salmonis]	S
A0A0J1M4M1	AB894_02935	Serine dehydratase	-6.67778	8.04414	3.2538	Piscirickettsia salmonis LF-89 = ATCC VR-1361.	Bacteria; Proteobacteria; Gammaproteobacteria; Thiotrichales;Piscirickettsiaceae; Piscirickettsia.	1227812	PSLF89_1149	chromosome	serine dehydratase	serine dehydratase [Piscirickettsia salmonis]_x0001_gb|AGG17610.1| L-serine dehydratase [Piscirickettsia salmonis]_x0001_gb|KGP94630.1| serine dehydratase [Piscirickettsia salmonis]	E
A0A0H4RGK2	pgi	Glucose-6-phosphate isomerase	-13.8854	7.09552	2.74725	Piscirickettsia salmonis LF-89 = ATCC VR-1361.	Bacteria; Proteobacteria; Gammaproteobacteria; Thiotrichales;Piscirickettsiaceae; Piscirickettsia.	1227812	PSLF89_1160	chromosome	glucose-6-phosphate isomerase	hypothetical protein [Piscirickettsia salmonis]_x0001_gb|KGP94431.1| phosphoglucose isomerase family protein [Piscirickettsia salmonis]	G	(gi:113461081) pgi (HS_0938) - glucose-6-phosphate isomerase [Haemophilus somnus str. 129PT]	Host immune evasion, molecular mimicry
A0A0H4QXY1	ycgM	YcgM	-5.44935	7.67494	24.537	Piscirickettsia salmonis LF-89 = ATCC VR-1361.	Bacteria; Proteobacteria; Gammaproteobacteria; Thiotrichales;Piscirickettsiaceae; Piscirickettsia.	1227812	PSLF89_1180	chromosome	hypothetical protein	hypothetical protein [Piscirickettsia salmonis]	Q
A0A0H4R1U0	PSLF89_1185	Uncharacterized protein	-4.26644	7.49866	10.9195	Piscirickettsia salmonis LF-89 = ATCC VR-1361.	Bacteria; Proteobacteria; Gammaproteobacteria; Thiotrichales;Piscirickettsiaceae; Piscirickettsia.	1227812	PSLF89_1185	chromosome	hypothetical protein	papain cysteine protease family protein, partial [Piscirickettsia salmonis]	O
A0A0J1JCN0	coaD	Phosphopantetheine adenylyltransferase	-13.1545	7.56698	12.7168	Piscirickettsia salmonis LF-89 = ATCC VR-1361.	Bacteria; Proteobacteria; Gammaproteobacteria; Thiotrichales;Piscirickettsiaceae; Piscirickettsia.	1227812	PSLF89_1191	chromosome	phosphopantetheine adenylyltransferase	hypothetical protein [Piscirickettsia salmonis]_x0001_gb|KGP94777.1| pantetheine-phosphate adenylyltransferase [Piscirickettsia salmonis]	H
A0A0H4QZV0	yhgF	YhgF	-13.0824	7.02892	2.32258	Piscirickettsia salmonis LF-89 = ATCC VR-1361.	Bacteria; Proteobacteria; Gammaproteobacteria; Thiotrichales;Piscirickettsiaceae; Piscirickettsia.	1227812	PSLF89_1195	chromosome	RNA-binding transcriptional accessory protein	hypothetical protein [Piscirickettsia salmonis]_x0001_gb|KGP94773.1| S1 RNA binding domain protein [Piscirickettsia salmonis]	K
A0A0J1J8V3	gatB	Aspartyl/glutamyl-tRNA(Asn/Gln) amidotransferase subunit B	-29.6499	6.96573	5.43933	Piscirickettsia salmonis LF-89 = ATCC VR-1361.	Bacteria; Proteobacteria; Gammaproteobacteria; Thiotrichales;Piscirickettsiaceae; Piscirickettsia.	1227812	PSLF89_1217	chromosome	glutamyl-tRNA amidotransferase	glutamyl-tRNA amidotransferase [Piscirickettsia salmonis]_x0001_gb|KGP98597.1| glutamyl-tRNA amidotransferase [Piscirickettsia salmonis]	J
A0A0H4RGP6	gatA	Glutamyl-tRNA(Gln) amidotransferase subunit A	-11.4829	7.91422	4.52675	Piscirickettsia salmonis LF-89 = ATCC VR-1361.	Bacteria; Proteobacteria; Gammaproteobacteria; Thiotrichales;Piscirickettsiaceae; Piscirickettsia.	1227812	PSLF89_1218	chromosome	glutamyl-tRNA amidotransferase	hypothetical protein [Piscirickettsia salmonis]_x0001_gb|KGP98596.1| aspartyl/glutamyl-tRNA(Asn/Gln) amidotransferase, A subunit [Piscirickettsia salmonis]	J
A0A0J1J911	ORFNames=AB894_12790, PSLF89_1232	Uncharacterized protein	-4.29971	7.14373	6.80272	Piscirickettsia salmonis LF-89 = ATCC VR-1361.	Bacteria; Proteobacteria; Gammaproteobacteria; Thiotrichales;Piscirickettsiaceae; Piscirickettsia.	1227812	PSLF89_1232	chromosome	hypothetical protein	hypothetical protein [Piscirickettsia salmonis]_x0001_gb|KGP97703.1| membrane protein [Piscirickettsia salmonis]	S
A0A0J1J963	dapD	2,3,4,5-tetrahydropyridine-2,6-dicarboxylate N-succinyltransferase	-15.6683	6.51678	8.79121	Piscirickettsia salmonis LF-89 = ATCC VR-1361.	Bacteria; Proteobacteria; Gammaproteobacteria; Thiotrichales;Piscirickettsiaceae; Piscirickettsia.	1227812	PSLF89_1233	chromosome	2,3,4,5-tetrahydropyridine-2,6-dicarboxylate N-succinyltransferase	hypothetical protein [Piscirickettsia salmonis]_x0001_gb|KGP97702.1| 2,3,4,5-tetrahydropyridine-2,6-dicarboxylate N-succinyltransferase[Piscirickettsia salmonis]	E
A0A0H4QY22	map	Methionine aminopeptidase	-13.8655	7.44039	5.85938	Piscirickettsia salmonis LF-89 = ATCC VR-1361.	Bacteria; Proteobacteria; Gammaproteobacteria; Thiotrichales;Piscirickettsiaceae; Piscirickettsia.	1227812	PSLF89_1237	chromosome	methionine aminopeptidase	hypothetical protein [Piscirickettsia salmonis]_x0001_gb|KGP97699.1| methionine aminopeptidase, type I [Piscirickettsia salmonis]	J
A0A0J1J988	rpsB	30S ribosomal protein S2	-143.733	8.57108	41.9608	Piscirickettsia salmonis LF-89 = ATCC VR-1361.	Bacteria; Proteobacteria; Gammaproteobacteria; Thiotrichales;Piscirickettsiaceae; Piscirickettsia.	1227812	PSLF89_1238	chromosome	30S ribosomal protein S2	30S ribosomal protein S2 [Piscirickettsia salmonis]_x0001_gb|KGP97698.1| 30S ribosomal protein S2 [Piscirickettsia salmonis]	J
U4TH46	tsf	Elongation factor Ts	-59.4944	8.0709	15.411	Piscirickettsia salmonis LF-89 = ATCC VR-1361.	Bacteria; Proteobacteria; Gammaproteobacteria; Thiotrichales;Piscirickettsiaceae; Piscirickettsia.	1227812	PSLF89_1239	chromosome	elongation factor Ts	elongation factor Ts [Piscirickettsia salmonis]_x0001_gb|KGP97697.1| translation elongation factor Ts [Piscirickettsia salmonis]	J
A0A0H4R1X9	frr	Ribosome-recycling factor	-15.8526	7.94139	18.4971	Piscirickettsia salmonis LF-89 = ATCC VR-1361.	Bacteria; Proteobacteria; Gammaproteobacteria; Thiotrichales;Piscirickettsiaceae; Piscirickettsia.	1227812	PSLF89_1241	chromosome	ribosome recycling factor	ribosome recycling factor [Piscirickettsia salmonis]_x0001_gb|KGP97695.1| ribosome recycling factor [Piscirickettsia salmonis]	J
A0A0J1J945	yaeT	Outer membrane protein assembly factor BamA	-10.8419	7.47914	3.47826	Piscirickettsia salmonis LF-89 = ATCC VR-1361.	Bacteria; Proteobacteria; Gammaproteobacteria; Thiotrichales;Piscirickettsiaceae; Piscirickettsia.	1227812	PSLF89_1252	chromosome	outer membrane protein assembly factor BamA	outer membrane assembly complex, YaeT protein [Piscirickettsia salmonis]	M
A0A0J1LZD3	ORFNames=AB894_12690, PSLF89_1253	Outer membrane family protein	-14.3671	7.46516	7.9096	Piscirickettsia salmonis LF-89 = ATCC VR-1361.	Bacteria; Proteobacteria; Gammaproteobacteria; Thiotrichales;Piscirickettsiaceae; Piscirickettsia.	1227812	PSLF89_1253	chromosome	outer membrane family protein	hypothetical protein [Piscirickettsia salmonis]_x0001_gb|KGP97683.1| outer membrane family protein [Piscirickettsia salmonis]	MO
U4TNK7	lpxD	UDP-3-O-acylglucosamine N-acyltransferase	-13.8606	7.21965	4.01146	Piscirickettsia salmonis LF-89 = ATCC VR-1361.	Bacteria; Proteobacteria; Gammaproteobacteria; Thiotrichales;Piscirickettsiaceae; Piscirickettsia.	1227812	PSLF89_1254	chromosome	UDP-3-O-(3-hydroxymyristoyl)glucosamine N-acyltransferase	hypothetical protein [Piscirickettsia salmonis]_x0001_gb|KGP97682.1| UDP-3-O-[3-hydroxymyristoyl] glucosamine N-acyltransferase [Piscirickettsia salmonis]	M	(gi:170717703) lpxD (HSM_1456) - UDP-3-O-(3-hydroxymyristoyl) glucosamine N-acyltransferase [Haemophilus somnus str. 2336]	Endotoxin
U4TPK6	fabZ	3-hydroxyacyl-[acyl-carrier-protein] dehydratase FabZ	-12.7382	7.38439	10.3448	Piscirickettsia salmonis LF-89 = ATCC VR-1361.	Bacteria; Proteobacteria; Gammaproteobacteria; Thiotrichales;Piscirickettsiaceae; Piscirickettsia.	1227812	PSLF89_1255	chromosome	beta-hydroxyacyl-ACP dehydratase	hypothetical protein [Piscirickettsia salmonis]_x0001_gb|KGP97681.1| 3-hydroxyacyl-ACP dehydratase [Piscirickettsia salmonis]	I	(gi:163843417) fabZ (BSUIS_A1200) - beta-hydroxyacyl-(acyl-carrier-protein) dehydratase FabZ [Brucella suis str. ATCC 23445 chromosome I]	Host immune evasion, molecular mimicry
A0A0H4QZN6	PSLF89_1281	Uncharacterized protein	-5.04722	7.65688	2.54545	Piscirickettsia salmonis LF-89 = ATCC VR-1361.	Bacteria; Proteobacteria; Gammaproteobacteria; Thiotrichales;Piscirickettsiaceae; Piscirickettsia.	1227812	PSLF89_1281	chromosome	hypothetical protein	hypothetical protein [Piscirickettsia salmonis]_x0001_gb|KGP97665.1| LysR family transcriptional regulator [Piscirickettsia salmonis]	No orthologs found
U4TF48	K661_01625	Uncharacterized protein	-4.45232	6.74933	8.49057	Piscirickettsia salmonis LF-89 = ATCC VR-1361.	Bacteria; Proteobacteria; Gammaproteobacteria; Thiotrichales;Piscirickettsiaceae; Piscirickettsia.	1227812	PSLF89_1299	chromosome	hypothetical protein	hypothetical protein [Piscirickettsia salmonis]_x0001_gb|KGP97139.1| hypothetical protein KU39_01152 [Piscirickettsia salmonis]	S
U4TIE1	K661_00477	CagE, TrbE, VirB , component of type IV transporter system family protein	-28.0781	7.52346	6.99638	Piscirickettsia salmonis LF-89 = ATCC VR-1361.	Bacteria; Proteobacteria; Gammaproteobacteria; Thiotrichales;Piscirickettsiaceae; Piscirickettsia.	1227812	PSLF89_130	chromosome	conjugal transfer protein TrbE	conjugal transfer protein TrbE [Piscirickettsia salmonis]_x0001_gb|KGP97545.1| conjugal transfer protein TrbE [Piscirickettsia salmonis]	U
A0A0H4QZQ3	guaB	Inosine-5'-monophosphate dehydrogenase	-64.5808	8.21897	25.1546	Piscirickettsia salmonis LF-89 = ATCC VR-1361.	Bacteria; Proteobacteria; Gammaproteobacteria; Thiotrichales;Piscirickettsiaceae; Piscirickettsia.	1227812	PSLF89_1300	chromosome	IMP dehydrogenase	inosine 5'-monophosphate dehydrogenase [Piscirickettsia salmonis]_x0001_gb|KGP97140.1| inosine 5'-monophosphate dehydrogenase [Piscirickettsia salmonis]	T
A0A0J1JAH2	guaA	GMP synthase [glutamine-hydrolyzing]	-39.1016	8.4814	11.4068	Piscirickettsia salmonis LF-89 = ATCC VR-1361.	Bacteria; Proteobacteria; Gammaproteobacteria; Thiotrichales;Piscirickettsiaceae; Piscirickettsia.	1227812	PSLF89_1301	chromosome	GMP synthetase	GMP synthase [Piscirickettsia salmonis]_x0001_gb|KGP97141.1| GMP synthase [Piscirickettsia salmonis]	F
A0A0H4RGW0	purL	Phosphoribosylformylglycinamidine synthase	-57.1744	7.96487	8.24345	Piscirickettsia salmonis LF-89 = ATCC VR-1361.	Bacteria; Proteobacteria; Gammaproteobacteria; Thiotrichales;Piscirickettsiaceae; Piscirickettsia.	1227812	PSLF89_1303	chromosome	phosphoribosylformylglycinamidine synthase	hypothetical protein [Piscirickettsia salmonis]_x0001_gb|KGP97143.1| phosphoribosylformylglycinamidine synthase [Piscirickettsia salmonis]	F
U4TEE5	speE	Spermidine synthase	-18.7887	7.86923	16.3763	Piscirickettsia salmonis LF-89 = ATCC VR-1361.	Bacteria; Proteobacteria; Gammaproteobacteria; Thiotrichales;Piscirickettsiaceae; Piscirickettsia.	1227812	PSLF89_1316	chromosome	spermidine synthase	hypothetical protein [Piscirickettsia salmonis]_x0001_gb|KGP97156.1| spermidine synthase [Piscirickettsia salmonis]	E
A0A0J1JBQ9	trbG	Conjugal transfer protein	-23.726	7.47974	11.8156	Piscirickettsia salmonis LF-89 = ATCC VR-1361.	Bacteria; Proteobacteria; Gammaproteobacteria; Thiotrichales;Piscirickettsiaceae; Piscirickettsia.	1227812	PSLF89_132	chromosome	conjugal transfer protein	hypothetical protein [Piscirickettsia salmonis]_x0001_gb|KGP97547.1| conjugal transfer family protein [Piscirickettsia salmonis]	U
U4TEF6	K661_01077	Cytosol aminopeptidase	-38.2949	7.9928	12.2004	Piscirickettsia salmonis LF-89 = ATCC VR-1361.	Bacteria; Proteobacteria; Gammaproteobacteria; Thiotrichales;Piscirickettsiaceae; Piscirickettsia.	1227812	PSLF89_1321	chromosome	cytochrome C oxidase subunit II	hypothetical protein [Piscirickettsia salmonis]_x0001_gb|KGP97161.1| cytochrome c oxidase subunit II [Piscirickettsia salmonis]	E
A0A0J1M020	tig	Trigger factor	-71.7499	8.09088	13.1336	Piscirickettsia salmonis LF-89 = ATCC VR-1361.	Bacteria; Proteobacteria; Gammaproteobacteria; Thiotrichales;Piscirickettsiaceae; Piscirickettsia.	1227812	PSLF89_1361	chromosome	trigger factor	trigger factor [Piscirickettsia salmonis]_x0001_gb|KGP97911.1| trigger factor [Piscirickettsia salmonis]	O	(gi:24378614) tig/ropA (SMU.91) - trigger factor [Streptococcus mutans str. UA159]	Protease
A0A0H4RH05	lon	Lon protease	-27.4078	7.64941	6.41975	Piscirickettsia salmonis LF-89 = ATCC VR-1361.	Bacteria; Proteobacteria; Gammaproteobacteria; Thiotrichales;Piscirickettsiaceae; Piscirickettsia.	1227812	PSLF89_1364	chromosome	DNA-binding protein	hypothetical protein [Piscirickettsia salmonis]_x0001_gb|KGP97908.1| ATP-dependent protease La [Piscirickettsia salmonis]	O
U4TGC0	hupB	DNA-binding protein HU-beta	-172.695	8.71277	53.3333	Piscirickettsia salmonis LF-89 = ATCC VR-1361.	Bacteria; Proteobacteria; Gammaproteobacteria; Thiotrichales;Piscirickettsiaceae; Piscirickettsia.	1227812	PSLF89_1365	chromosome	DNA-binding protein HU	DNA-binding protein HU-beta [Piscirickettsia salmonis]_x0001_gb|ERL63209.1| DNA-binding protein HU-beta [Piscirickettsia salmonis LF-89 =ATCC VR-1361]_x0001_gb|KGP97907.1| DNA-binding protein HU-beta [Piscirickettsia salmonis]_x0001_gb|KGQ00172.1| DNA-binding protein HU-beta [Piscirickettsia salmonis]	L
A0A0H4RH18	dacC	DacC	-19.826	7.6522	10.9533	Piscirickettsia salmonis LF-89 = ATCC VR-1361.	Bacteria; Proteobacteria; Gammaproteobacteria; Thiotrichales;Piscirickettsiaceae; Piscirickettsia.	1227812	PSLF89_1375	chromosome	D-alanyl-D-alanine carboxypeptidase	D-alanyl-D-alanine carboxypeptidase [Piscirickettsia salmonis]	M
U4TCV0	K661_01107	Uncharacterized protein	-5.98585	8.07913	3.48485	Piscirickettsia salmonis LF-89 = ATCC VR-1361.	Bacteria; Proteobacteria; Gammaproteobacteria; Thiotrichales;Piscirickettsiaceae; Piscirickettsia.	1227812	PSLF89_1397	chromosome	hypothetical protein	hypothetical protein [Piscirickettsia salmonis]_x0001_gb|KGP94100.1| thiol:disulfide interchange protein [Piscirickettsia salmonis]	No orthologs found
U4TFX4	hupB	DNA-binding protein HU	-11.9044	8.20626	12.844	Piscirickettsia salmonis LF-89 = ATCC VR-1361.	Bacteria; Proteobacteria; Gammaproteobacteria; Thiotrichales;Piscirickettsiaceae; Piscirickettsia.	1227812	PSLF89_1413	chromosome	DNA-binding protein HU	transcriptional regulator HU subunit alpha [Piscirickettsia salmonis]	L
A0A0J1JAR1	mdh	Malate dehydrogenase	-111.626	8.83003	44.9231	Piscirickettsia salmonis LF-89 = ATCC VR-1361.	Bacteria; Proteobacteria; Gammaproteobacteria; Thiotrichales;Piscirickettsiaceae; Piscirickettsia.	1227812	PSLF89_1417	chromosome	malate dehydrogenase	hypothetical protein [Piscirickettsia salmonis]_x0001_gb|KGP94559.1| malate dehydrogenase [Piscirickettsia salmonis]	C
U4TLD5	K661_01215	AhpC/TSA family protein	-125.979	8.13629	9.00474	Piscirickettsia salmonis LF-89 = ATCC VR-1361.	Bacteria; Proteobacteria; Gammaproteobacteria; Thiotrichales;Piscirickettsiaceae; Piscirickettsia.	1227812	PSLF89_1459	chromosome	alkyl hydroperoxide reductase	ahpC/TSA family protein [Piscirickettsia salmonis]	V	(gi:253798492) ahpC (TBMG_01544) - alkyl hydroperoxide reductase C protein ahpC [Mycobacterium tuberculosis str. KZN 1435]	Stress adaptation
A0A0H4RH96	htrA	HtrA	-21.3339	7.66113	8.83002	Piscirickettsia salmonis LF-89 = ATCC VR-1361.	Bacteria; Proteobacteria; Gammaproteobacteria; Thiotrichales;Piscirickettsiaceae; Piscirickettsia.	1227812	PSLF89_1476	chromosome	peptidase Do family protein	peptidase Do family protein [Piscirickettsia salmonis]_x0001_gb|KGP94311.1| peptidase Do family protein [Piscirickettsia salmonis]	OK	(gi:152988178) mucD (PSPA7_4753) - serine protease MucD precursor [Pseudomonas aeruginosa str. PA7]	Antiphagocytosis, capsule
A0A0J1JF47	rpoD	RNA polymerase sigma factor RpoD	-12.0107	7.23783	3.5313	Piscirickettsia salmonis LF-89 = ATCC VR-1361.	Bacteria; Proteobacteria; Gammaproteobacteria; Thiotrichales;Piscirickettsiaceae; Piscirickettsia.	1227812	PSLF89_1506	chromosome	RNA polymerase subunit sigma-70	hypothetical protein [Piscirickettsia salmonis]_x0001_gb|KGP94542.1| RNA polymerase sigma factor rpoD [Piscirickettsia salmonis]	K	(gi:118469122) sigA/rpoV (MSMEG_2758) - sigma factor MysA [Mycobacterium smegmatis str. MC2 155]	Regulation
U4TAP8	rpsU	30S ribosomal protein S21	-25.4727	8.21259	30.9859	Piscirickettsia salmonis LF-89 = ATCC VR-1361.	Bacteria; Proteobacteria; Gammaproteobacteria; Thiotrichales;Piscirickettsiaceae; Piscirickettsia.	1227812	PSLF89_1509	chromosome	30S ribosomal protein S21	30S ribosomal protein S21 [Piscirickettsia salmonis]_x0001_gb|ERL61791.1| ribosomal protein S21 [Piscirickettsia salmonis LF-89 = ATCC VR-1361]_x0001_gb|KGP94545.1| ribosomal protein S21 [Piscirickettsia salmonis]_x0001_gb|KGP95875.1| ribosomal protein S21 [Piscirickettsia salmonis]	J
A0A0J1J9H6	pyrC	Dihydroorotase	-110.576	8.40869	26.3514	Piscirickettsia salmonis LF-89 = ATCC VR-1361.	Bacteria; Proteobacteria; Gammaproteobacteria; Thiotrichales;Piscirickettsiaceae; Piscirickettsia.	1227812	PSLF89_1526	chromosome	dihydroorotase	hypothetical protein [Piscirickettsia salmonis]_x0001_gb|KGP98355.1| dihydroorotase, multifunctional complex type domain protein [Piscirickettsia salmonis]	F
A0A0J1J9G4	pdxH	Pyridoxine/pyridoxamine 5'-phosphate oxidase	-10.8434	7.39118	9.85916	Piscirickettsia salmonis LF-89 = ATCC VR-1361.	Bacteria; Proteobacteria; Gammaproteobacteria; Thiotrichales;Piscirickettsiaceae; Piscirickettsia.	1227812	PSLF89_1527	chromosome	pyridoxamine 5'-phosphate oxidase	hypothetical protein [Piscirickettsia salmonis]_x0001_gb|KGP98356.1| pyridoxamine 5'-phosphate oxidase [Piscirickettsia salmonis]	H	(gi:152983909) phzG2 (PSPA7_3379) - probable pyridoxamine 5-phosphate oxidase [Pseudomonas aeruginosa str. PA7]	Antimicrobial activity
U4TIR3	clpA	ATP-dependent Clp protease ATP-binding subunit ClpA	-14.9934	6.40861	2.37781	Piscirickettsia salmonis LF-89 = ATCC VR-1361.	Bacteria; Proteobacteria; Gammaproteobacteria; Thiotrichales;Piscirickettsiaceae; Piscirickettsia.	1227812	PSLF89_1558	chromosome	ATP-dependent Clp protease ATP-binding subunit ClpA	hypothetical protein [Piscirickettsia salmonis]_x0001_gb|KGP96411.1| ATP-dependent Clp protease ATP-binding subunit ClpA [Piscirickettsia salmonis]	O	(gi:147672171) vasG (VC0395_0021) - clpB protein [Vibrio cholerae str. O395 chromosome I]	Secretion system
U4TH07	trxB	Thioredoxin reductase	-5.43458	6.27261	2.20126	Piscirickettsia salmonis LF-89 = ATCC VR-1361.	Bacteria; Proteobacteria; Gammaproteobacteria; Thiotrichales;Piscirickettsiaceae; Piscirickettsia.	1227812	PSLF89_1563	chromosome	thioredoxin reductase	thioredoxin reductase [Piscirickettsia salmonis]_x0001_gb|KGP98003.1| thioredoxin reductase [Piscirickettsia salmonis]	O
A0A0J1LZG5	ndk	Nucleoside diphosphate kinase	-84.899	8.64653	54.9296	Piscirickettsia salmonis LF-89 = ATCC VR-1361.	Bacteria; Proteobacteria; Gammaproteobacteria; Thiotrichales;Piscirickettsiaceae; Piscirickettsia.	1227812	PSLF89_1570	chromosome	nucleoside-diphosphate kinase	nucleoside diphosphate kinase [Piscirickettsia salmonis]_x0001_gb|KGP97996.1| nucleoside diphosphate kinase [Piscirickettsia salmonis]	F
A0A0J1LZG1	ORFNames=AB894_12510, PSLF89_1576	Uncharacterized protein	-12.7485	7.04224	5.3719	Piscirickettsia salmonis LF-89 = ATCC VR-1361.	Bacteria; Proteobacteria; Gammaproteobacteria; Thiotrichales;Piscirickettsiaceae; Piscirickettsia.	1227812	PSLF89_1576	chromosome	hypothetical protein	hypothetical protein [Piscirickettsia salmonis]_x0001_gb|KGP97990.1| tetratricopeptide repeat family protein [Piscirickettsia salmonis]	T
A0A0H4R0A5	rne	Ribonuclease E	-53.2989	7.9014	6.17978	Piscirickettsia salmonis LF-89 = ATCC VR-1361.	Bacteria; Proteobacteria; Gammaproteobacteria; Thiotrichales;Piscirickettsiaceae; Piscirickettsia.	1227812	PSLF89_1597	chromosome	ribonuclease	ribonuclease [Piscirickettsia salmonis]_x0001_gb|KGP97972.1| ribonuclease [Piscirickettsia salmonis]	M
A0A0J1J9C2	ruvB	Holliday junction ATP-dependent DNA helicase RuvB	-16.0372	7.00263	7.14286	Piscirickettsia salmonis LF-89 = ATCC VR-1361.	Bacteria; Proteobacteria; Gammaproteobacteria; Thiotrichales;Piscirickettsiaceae; Piscirickettsia.	1227812	PSLF89_1603	chromosome	ATP-dependent DNA helicase RuvB	hypothetical protein [Piscirickettsia salmonis]_x0001_gb|KGP97966.1| holliday junction DNA helicase RuvB [Piscirickettsia salmonis]	L
A0A0J1J947	pal	OmpA family protein	-25.8649	7.82829	20.6573	Piscirickettsia salmonis LF-89 = ATCC VR-1361.	Bacteria; Proteobacteria; Gammaproteobacteria; Thiotrichales;Piscirickettsiaceae; Piscirickettsia.	1227812	PSLF89_1608	chromosome	cell envelope biogenesis protein OmpA	hypothetical protein [Piscirickettsia salmonis]_x0001_gb|KGP97961.1| ompA family protein [Piscirickettsia salmonis]	M	(gi:57238501) cadF (CJE1651) - fibronectin-binding protein [Campylobacter jejuni str. RM1221]	Adhesins, adherence and adhesion-related proteins
A0A0J1JDY4	ORFNames=AB894_04095, PSLF89_1645	Cell division protein ZipA	-14.4713	7.26747	5.43478	Piscirickettsia salmonis LF-89 = ATCC VR-1361.	Bacteria; Proteobacteria; Gammaproteobacteria; Thiotrichales;Piscirickettsiaceae; Piscirickettsia.	1227812	PSLF89_1645	chromosome	cell division protein FtsZ	hypothetical protein [Piscirickettsia salmonis]_x0001_gb|KGP95365.1| zipA, C-terminal FtsZ-binding domain protein [Piscirickettsia salmonis]	D
A0A0H4R2W6	sohB	Peptidase	-21.941	7.43365	7.97721	Piscirickettsia salmonis LF-89 = ATCC VR-1361.	Bacteria; Proteobacteria; Gammaproteobacteria; Thiotrichales;Piscirickettsiaceae; Piscirickettsia.	1227812	PSLF89_1648	chromosome	peptidase	peptidase [Piscirickettsia salmonis]_x0001_gb|KGP95363.1| peptidase [Piscirickettsia salmonis]	O
A0A0H4RHQ5	yneI	YneI	-30.7984	8.15046	12.6147	Piscirickettsia salmonis LF-89 = ATCC VR-1361.	Bacteria; Proteobacteria; Gammaproteobacteria; Thiotrichales;Piscirickettsiaceae; Piscirickettsia.	1227812	PSLF89_1671	chromosome	succinate-semialdehyde dehydrogenase	hypothetical protein [Piscirickettsia salmonis]_x0001_gb|KGP94490.1| aldehyde dehydrogenase family protein [Piscirickettsia salmonis]	C
A0A0J1M325	ORFNames=AB894_05985, PSLF89_1674	Uncharacterized protein	-13.8058	8.21711	11.1111	Piscirickettsia salmonis LF-89 = ATCC VR-1361.	Bacteria; Proteobacteria; Gammaproteobacteria; Thiotrichales;Piscirickettsiaceae; Piscirickettsia.	1227812	PSLF89_1674	chromosome	hypothetical protein	hypothetical protein [Piscirickettsia salmonis]_x0001_gb|KGP94493.1| CBS protein [Piscirickettsia salmonis]	T
U4TBD6	K661_02179	Bacterial extracellular solute-binding s, 3 family protein	-5.1894	8.10213	6.98529	Piscirickettsia salmonis LF-89 = ATCC VR-1361.	Bacteria; Proteobacteria; Gammaproteobacteria; Thiotrichales;Piscirickettsiaceae; Piscirickettsia.	1227812	PSLF89_1675	chromosome	ABC transporter substrate-binding protein	hypothetical protein [Piscirickettsia salmonis]_x0001_gb|KGP94494.1| bacterial extracellular solute-binding s, 3 family protein [Piscirickettsia salmonis]	ET
A0A0H4QZ69	PSLF89_1731	Isochorismatase	-12.2245	6.4618	9.32643	Piscirickettsia salmonis LF-89 = ATCC VR-1361.	Bacteria; Proteobacteria; Gammaproteobacteria; Thiotrichales;Piscirickettsiaceae; Piscirickettsia.	1227812	PSLF89_1731	chromosome	isochorismatase	hypothetical protein [Piscirickettsia salmonis]_x0001_gb|KGP96215.1| isochorismatase [Piscirickettsia salmonis]	H	(gi:187732104) entB (SbBS512_E0497) - isochorismatase [Shigella boydii str. CDC 3083-94 (serotype 18)]	Metal uptake and heme acquisition
A0A0J1J9Z3	glpD	Glycerol-3-phosphate dehydrogenase	-13.4426	7.09768	5.08806	Piscirickettsia salmonis LF-89 = ATCC VR-1361.	Bacteria; Proteobacteria; Gammaproteobacteria; Thiotrichales;Piscirickettsiaceae; Piscirickettsia.	1227812	PSLF89_1739	chromosome	glycerol-3-phosphate dehydrogenase; disrupted		G
A0A0H4R0L4	pepA	Probable cytosol aminopeptidase	-71.0011	8.54021	17.7551	Piscirickettsia salmonis LF-89 = ATCC VR-1361.	Bacteria; Proteobacteria; Gammaproteobacteria; Thiotrichales;Piscirickettsiaceae; Piscirickettsia.	1227812	PSLF89_1757	chromosome	aminopeptidase	hypothetical protein [Piscirickettsia salmonis]_x0001_gb|KGP96515.1| cytosol aminopeptidase [Piscirickettsia salmonis]	E
A0A0H4QZA2	serS	Serine--tRNA ligase	-11.3486	7.09884	3.30189	Piscirickettsia salmonis LF-89 = ATCC VR-1361.	Bacteria; Proteobacteria; Gammaproteobacteria; Thiotrichales;Piscirickettsiaceae; Piscirickettsia.	1227812	PSLF89_1769	chromosome	serine--tRNA ligase	seryl-tRNA synthetase [Piscirickettsia salmonis]_x0001_gb|KGP96527.1| seryl-tRNA synthetase [Piscirickettsia salmonis]	J
U4THH6	glnA	Glutamine synthetase	-24.64	7.71926	7.46269	Piscirickettsia salmonis LF-89 = ATCC VR-1361.	Bacteria; Proteobacteria; Gammaproteobacteria; Thiotrichales;Piscirickettsiaceae; Piscirickettsia.	1227812	PSLF89_179	chromosome	glutamine synthetase	glutamine synthetase, type I [Piscirickettsia salmonis]_x0001_gb|ERL62820.1| glutamine synthetase, type I [Piscirickettsia salmonis LF-89= ATCC VR-1361]_x0001_gb|KGP96748.1| glutamine synthetase, type I [Piscirickettsia salmonis]_x0001_gb|KGP97118.1| glutamine synthetase, type I [Piscirickettsia salmonis]_x0001_gb|KGP97884.1| glutamine synthetase, type I [Piscirickettsia salmonis]_x0001_gb|KGP993…	E	(gi:315443861) glnA1 (Mspyr1_22590) - L-glutamine synthetase [Mycobacterium gilvum str. Spyr1]	Motility and export apparatus
A0A0J1JBD1	minD	Site-determining protein	-5.3279	5.97112	2.57353	Piscirickettsia salmonis LF-89 = ATCC VR-1361.	Bacteria; Proteobacteria; Gammaproteobacteria; Thiotrichales;Piscirickettsiaceae; Piscirickettsia.	1227812	PSLF89_1792	chromosome	septum site-determining protein MinD	cell division inhibitor MinD [Piscirickettsia salmonis]_x0001_gb|KGP94579.1| cell division inhibitor MinD [Piscirickettsia salmonis]	D	(gi:118474588) flhG (CFF8240_1509) - ATPase, ParA family [Campylobacter fetus str. 82-40 (subsp. fetus)]	Motility and export apparatus
A0A0H4QV27	ddl	D-alanine--D-alanine ligase	-4.16154	6.99803	7.24638	Piscirickettsia salmonis LF-89 = ATCC VR-1361.	Bacteria; Proteobacteria; Gammaproteobacteria; Thiotrichales;Piscirickettsiaceae; Piscirickettsia.	1227812	PSLF89_18	chromosome	D-alanine--D-alanine ligase	hypothetical protein [Piscirickettsia salmonis]_x0001_gb|KGP98254.1| D-alanine--D-alanine ligase family protein [Piscirickettsia salmonis]	MR
A0A0J1LYN8	hemB	Delta-aminolevulinic acid dehydratase	-4.11052	7.46182	6.0423	Piscirickettsia salmonis LF-89 = ATCC VR-1361.	Bacteria; Proteobacteria; Gammaproteobacteria; Thiotrichales;Piscirickettsiaceae; Piscirickettsia.	1227812	PSLF89_181	chromosome	delta-aminolevulinic acid dehydratase	hypothetical protein [Piscirickettsia salmonis]_x0001_gb|KGP96746.1| delta-aminolevulinic acid dehydratase [Piscirickettsia salmonis]_x0001_gb|KGP97120.1| delta-aminolevulinic acid dehydratase [Piscirickettsia salmonis]_x0001_gb|KGP97882.1| delta-aminolevulinic acid dehydratase [Piscirickettsia salmonis]	H	(gi:170717931) hemB (HSM_1661) - Porphobilinogen synthase [Haemophilus somnus str. 2336]	Metal uptake and heme acquisition
U4TE91	ORFNames=AB894_09385, K661_00581	Nucleoid-associated protein AB894_09385	-12.5597	6.3183	25.4545	Piscirickettsia salmonis LF-89 = ATCC VR-1361.	Bacteria; Proteobacteria; Gammaproteobacteria; Thiotrichales;Piscirickettsiaceae; Piscirickettsia.	1227812	PSLF89_1810	chromosome	nucleoid-associated protein	DNA-binding protein, YbaB/EbfC family [Piscirickettsia salmonis]_x0001_gb|ERL63056.1| DNA-binding protein, YbaB/EbfC family [Piscirickettsia salmonis LF-89 = ATCC VR-1361]_x0001_gb|KGP96143.1| DNA-binding protein, YbaB/EbfC family [Piscirickettsia salmonis]_x0001_gb|KGP98975.1| DNA-binding protein, YbaB/EbfC family [Piscirickettsia salmonis]	R
A0A0J1M176	htpG	Chaperone protein HtpG	-92.2828	8.45359	20.2512	Piscirickettsia salmonis LF-89 = ATCC VR-1361.	Bacteria; Proteobacteria; Gammaproteobacteria; Thiotrichales;Piscirickettsiaceae; Piscirickettsia.	1227812	PSLF89_1814	chromosome	molecular chaperone HtpG	hypothetical protein [Piscirickettsia salmonis]_x0001_gb|KGP96139.1| chaperone protein htpG [Piscirickettsia salmonis]	O
A0A0J1JCW7	ORFNames=AB894_05570, PSLF89_1828	Peptidase M16	-146.883	8.64208	22.3361	Piscirickettsia salmonis LF-89 = ATCC VR-1361.	Bacteria; Proteobacteria; Gammaproteobacteria; Thiotrichales;Piscirickettsiaceae; Piscirickettsia.	1227812	PSLF89_1828	chromosome	peptidase M16	peptidase M16 [Piscirickettsia salmonis]	O
A0A0J1J860	rho	Transcription termination factor Rho	-53.9331	8.09149	15.0358	Piscirickettsia salmonis LF-89 = ATCC VR-1361.	Bacteria; Proteobacteria; Gammaproteobacteria; Thiotrichales;Piscirickettsiaceae; Piscirickettsia.	1227812	PSLF89_185	chromosome	transcription termination factor Rho	transcription termination factor Rho [Piscirickettsia salmonis]_x0001_gb|KGP96742.1| transcription termination factor Rho [Piscirickettsia salmonis]_x0001_gb|KGP97124.1| transcription termination factor Rho [Piscirickettsia salmonis]_x0001_gb|KGP97878.1| transcription termination factor Rho [Piscirickettsia salmonis]	K	(gi:197249395) ssaN (SeAg_B1758) - type III secretion system ATPase [Salmonella enterica str. SL483 (serovar Agona)]	Secretion system
A0A0H4R1C4	bcp	Bcp	-23.5788	7.83609	22.9299	Piscirickettsia salmonis LF-89 = ATCC VR-1361.	Bacteria; Proteobacteria; Gammaproteobacteria; Thiotrichales;Piscirickettsiaceae; Piscirickettsia.	1227812	PSLF89_1861	chromosome	peroxiredoxin	hypothetical protein [Piscirickettsia salmonis]_x0001_gb|KGP98342.1| ahpC/TSA family protein [Piscirickettsia salmonis]	O	(gi:169631483) ahpC (MAB_4408c) - putative alkylhydroperoxidase C [Mycobacterium abscessus str. ATCC 19977]	Stress adaptation
U4THQ5	dapA	4-hydroxy-tetrahydrodipicolinate synthase	-31.2876	8.01262	15.8451	Piscirickettsia salmonis LF-89 = ATCC VR-1361.	Bacteria; Proteobacteria; Gammaproteobacteria; Thiotrichales;Piscirickettsiaceae; Piscirickettsia.	1227812	PSLF89_1862	chromosome	4-hydroxy-tetrahydrodipicolinate synthase	hypothetical protein [Piscirickettsia salmonis]_x0001_gb|KGP98343.1| dihydrodipicolinate synthase [Piscirickettsia salmonis]	EM
A0A0J1J9H8	purC	Phosphoribosylaminoimidazole-succinocarboxamide synthase	-89.6807	8.48487	28.27	Piscirickettsia salmonis LF-89 = ATCC VR-1361.	Bacteria; Proteobacteria; Gammaproteobacteria; Thiotrichales;Piscirickettsiaceae; Piscirickettsia.	1227812	PSLF89_1863	chromosome	phosphoribosylaminoimidazolesuccinocarboxamide synthase	hypothetical protein [Piscirickettsia salmonis]_x0001_gb|KGP98345.1| phosphoribosylaminoimidazolesuccinocarboxamide synthase [Piscirickettsia salmonis]	F	(gi:15828193) purC (ML2227) - phosphoribosylaminoimidazole-succinocarboxamide synthase [Mycobacterium leprae str. TN]	Amino acid and purine metabolism
U4TGX6	ORFNames=AB894_00585, K661_02726	Ferritin	-34.4179	7.86222	18.1818	Piscirickettsia salmonis LF-89 = ATCC VR-1361.	Bacteria; Proteobacteria; Gammaproteobacteria; Thiotrichales;Piscirickettsiaceae; Piscirickettsia.	1227812	PSLF89_1925	chromosome	DNA starvation/stationary phase protection protein	ferritin-like domain protein [Piscirickettsia salmonis]_x0001_gb|ERL60952.1| ferritin-like domain protein [Piscirickettsia salmonis LF-89= ATCC VR-1361]_x0001_gb|KGP95419.1| ferritin-like domain protein [Piscirickettsia salmonis]_x0001_gb|KGP97439.1| ferritin-like domain protein [Piscirickettsia salmonis]	PV	(gi:188527050) napA (HPSH_01265) - neutrophil activating protein (napA) (bacterioferritin) [Helicobacter pylori str. Shi470]	Host immune evasion, molecular mimicry
A0A0H4R1I8	katB	Catalase	-30.4751	7.61123	5.5102	Piscirickettsia salmonis LF-89 = ATCC VR-1361.	Bacteria; Proteobacteria; Gammaproteobacteria; Thiotrichales;Piscirickettsiaceae; Piscirickettsia.	1227812	PSLF89_1927	chromosome	catalase	catalase [Piscirickettsia salmonis]	P
U4TG51	K661_02724	CBS domain protein	-5.55245	7.07696	9.33333	Piscirickettsia salmonis LF-89 = ATCC VR-1361.	Bacteria; Proteobacteria; Gammaproteobacteria; Thiotrichales;Piscirickettsiaceae; Piscirickettsia.	1227812	PSLF89_1928	chromosome	hypothetical protein	hypothetical protein [Piscirickettsia salmonis]_x0001_gb|KGP95422.1| CBS domain protein [Piscirickettsia salmonis]	T
A0A0H4R105	folC	Bifunctional FolC family protein	-12.5644	6.7425	6.90476	Piscirickettsia salmonis LF-89 = ATCC VR-1361.	Bacteria; Proteobacteria; Gammaproteobacteria; Thiotrichales;Piscirickettsiaceae; Piscirickettsia.	1227812	PSLF89_1950	chromosome	bifunctional FolC family protein	hypothetical protein [Piscirickettsia salmonis]_x0001_gb|KGP95255.1| bifunctional FolC family protein [Piscirickettsia salmonis]	H
U4TC17	purF	Amidophosphoribosyltransferase	-11.9239	6.92676	4.79042	Piscirickettsia salmonis LF-89 = ATCC VR-1361.	Bacteria; Proteobacteria; Gammaproteobacteria; Thiotrichales;Piscirickettsiaceae; Piscirickettsia.	1227812	PSLF89_1952	chromosome	amidophosphoribosyltransferase	hypothetical protein [Piscirickettsia salmonis]_x0001_gb|KGP95253.1| amidophosphoribosyltransferase [Piscirickettsia salmonis]	F
A0A0H4RIB4	recA	Protein RecA	-22.9982	7.60886	10.1156	Piscirickettsia salmonis LF-89 = ATCC VR-1361.	Bacteria; Proteobacteria; Gammaproteobacteria; Thiotrichales;Piscirickettsiaceae; Piscirickettsia.	1227812	PSLF89_1959	chromosome	DNA recombination/repair protein RecA	recombinase RecA [Piscirickettsia salmonis]_x0001_gb|KGP97220.1| recombinase RecA [Piscirickettsia salmonis]	L
U4TN61	alaS	Alanine--tRNA ligase	-20.0324	7.14045	3.00926	Piscirickettsia salmonis LF-89 = ATCC VR-1361.	Bacteria; Proteobacteria; Gammaproteobacteria; Thiotrichales;Piscirickettsiaceae; Piscirickettsia.	1227812	PSLF89_1961	chromosome	alanine--tRNA ligase	alanyl-tRNA synthetase [Piscirickettsia salmonis]_x0001_gb|KGP97218.1| alanine--tRNA ligase [Piscirickettsia salmonis]	J
A0A0J1J925	csrA	Carbon storage regulator homolog	-24.2927	7.61307	36.7816	Piscirickettsia salmonis LF-89 = ATCC VR-1361.	Bacteria; Proteobacteria; Gammaproteobacteria; Thiotrichales;Piscirickettsiaceae; Piscirickettsia.	1227812	PSLF89_1962	chromosome	carbon storage regulator	hypothetical protein [Piscirickettsia salmonis]_x0001_gb|KGP97217.1| carbon storage regulator [Piscirickettsia salmonis]	T	(gi:54296805) csrA (lpp0845) - global regulator CsrA [Legionella pneumophila str. Paris]	Regulation
A0A0J1J8W1	hflX	GTPase HflX	-5.74468	6.5683	5.14019	Piscirickettsia salmonis LF-89 = ATCC VR-1361.	Bacteria; Proteobacteria; Gammaproteobacteria; Thiotrichales;Piscirickettsiaceae; Piscirickettsia.	1227812	PSLF89_1974	chromosome	GTPase HflX	hypothetical protein [Piscirickettsia salmonis]	J
U4TI00	hflK	HflK protein	-89.8478	8.40655	21.5347	Piscirickettsia salmonis LF-89 = ATCC VR-1361.	Bacteria; Proteobacteria; Gammaproteobacteria; Thiotrichales;Piscirickettsiaceae; Piscirickettsia.	1227812	PSLF89_1975	chromosome	hflK protein	hflK protein [Piscirickettsia salmonis]_x0001_gb|KGP97197.1| hflK protein [Piscirickettsia salmonis]	O
A0A0J1LZA6	AB894_12950	Protein HflC	-13.654	7.37859	7.74411	Piscirickettsia salmonis LF-89 = ATCC VR-1361.	Bacteria; Proteobacteria; Gammaproteobacteria; Thiotrichales;Piscirickettsiaceae; Piscirickettsia.	1227812	PSLF89_1976	chromosome	hflC protein	hypothetical protein [Piscirickettsia salmonis]_x0001_gb|KGP97196.1| hflC protein [Piscirickettsia salmonis]	O
A0A0J1J8Z9	purA	Adenylosuccinate synthetase	-12.3307	7.28171	3.00926	Piscirickettsia salmonis LF-89 = ATCC VR-1361.	Bacteria; Proteobacteria; Gammaproteobacteria; Thiotrichales;Piscirickettsiaceae; Piscirickettsia.	1227812	PSLF89_1977	chromosome	adenylosuccinate synthetase	hypothetical protein [Piscirickettsia salmonis]_x0001_gb|KGP97195.1| adenylosuccinate synthase [Piscirickettsia salmonis]	F
A0A0H4QZU3	pvuA	PvuA	-5.38915	7.22414	4.57797	Piscirickettsia salmonis LF-89 = ATCC VR-1361.	Bacteria; Proteobacteria; Gammaproteobacteria; Thiotrichales;Piscirickettsiaceae; Piscirickettsia.	1227812	PSLF89_1991	chromosome	TonB-dependent receptor	hypothetical protein [Piscirickettsia salmonis]_x0001_gb|AIE90160.1| siderophore carboxylate outer membrane receptor [Piscirickettsia salmonis]_x0001_gb|KGP96609.1| tonB-dependent siderophore receptor family protein [Piscirickettsia salmonis]	P	(gi:152984528) fpvA (PSPA7_2861) - ferrichrome-iron receptor (Ferric hydroxamate uptake)(Ferric hydroxamate receptor) [Pseudomonas aeruginosa str. PA7]	Metal uptake and heme acquisition
A0A0J1JD63	ORFNames=AB894_05440, PSLF89_1992	Biopolymer transporter ExbB	-15.4616	7.10641	7.6555	Piscirickettsia salmonis LF-89 = ATCC VR-1361.	Bacteria; Proteobacteria; Gammaproteobacteria; Thiotrichales;Piscirickettsiaceae; Piscirickettsia.	1227812	PSLF89_1992	chromosome	biopolymer transporter ExbB	hypothetical protein [Piscirickettsia salmonis]	U
U4TFD9	K661_02977	N-acetylmuramoyl-L-alanine amidase family protein	-5.85387	5.60224	3.10078	Piscirickettsia salmonis LF-89 = ATCC VR-1361.	Bacteria; Proteobacteria; Gammaproteobacteria; Thiotrichales;Piscirickettsiaceae; Piscirickettsia.	1227812	PSLF89_1p119	pPSLF89-1	N-acetylmuramoyl-L-alanine amidase	hypothetical protein [Piscirickettsia salmonis]_x0001_gb|KGP98525.1| N-acetylmuramoyl-L-alanine amidase family protein [Piscirickettsia salmonis]	M
A0A0J1LYF1	fic	Cell filamentation protein Fic	-255.283	8.45244	44.7368	Piscirickettsia salmonis LF-89 = ATCC VR-1361.	Bacteria; Proteobacteria; Gammaproteobacteria; Thiotrichales;Piscirickettsiaceae; Piscirickettsia.	1227812	PSLF89_1p174	pPSLF89-1	cell filamentation protein Fic	hypothetical protein [Piscirickettsia salmonis]_x0001_gb|KGP94393.1| fic/DOC family protein [Piscirickettsia salmonis]_x0001_gb|KGP95542.1| fic/DOC family protein [Piscirickettsia salmonis]	K
U4TAB7	ORFNames=AB894_06090, K661_02536	CobQ/CobB/MinD/ParA nucleotide binding domain protein	-6.06972	7.42038	10.6122	Piscirickettsia salmonis LF-89 = ATCC VR-1361.	Bacteria; Proteobacteria; Gammaproteobacteria; Thiotrichales;Piscirickettsiaceae; Piscirickettsia.	1227812	PSLF89_1p22	pPSLF89-1	hypothetical protein	cobQ/CobB/MinD/ParA nucleotide binding domain protein [Piscirickettsia salmonis]	D
A0A0H4R3L9	PSLF89_1p224	Uncharacterized protein	-5.2136	6.84561	11.9816	Piscirickettsia salmonis LF-89 = ATCC VR-1361.	Bacteria; Proteobacteria; Gammaproteobacteria; Thiotrichales;Piscirickettsiaceae; Piscirickettsia.	1227812	PSLF89_1p224	pPSLF89-1	hypothetical protein	hypothetical protein [Piscirickettsia salmonis]	S	(gi:29143043) pipB2 (t2674) - hypothetical protein [Salmonella enterica str. Ty2 (serovar Typhi)]	Toxin, efector protein
U4TMG2	rpoA	DNA-directed RNA polymerase subunit alpha	-55.6009	8.25785	16.6154	Piscirickettsia salmonis LF-89 = ATCC VR-1361.	Bacteria; Proteobacteria; Gammaproteobacteria; Thiotrichales;Piscirickettsiaceae; Piscirickettsia.	1227812	PSLF89_1p23	pPSLF89-1	hypothetical protein	transcriptional regulator family protein [Piscirickettsia salmonis]	No orthologs found
A0A0J1JB93	dnaN	DNA polymerase III subunit beta	-39.3131	7.88334	15.4891	Piscirickettsia salmonis LF-89 = ATCC VR-1361.	Bacteria; Proteobacteria; Gammaproteobacteria; Thiotrichales;Piscirickettsiaceae; Piscirickettsia.	1227812	PSLF89_2	chromosome	DNA polymerase III subunit beta	DNA polymerase III subunit beta [Piscirickettsia salmonis]_x0001_gb|KGP98237.1| DNA polymerase III, beta subunit [Piscirickettsia salmonis]	L
U4T9Y7	rpsP	30S ribosomal protein S16	-25.7743	8.4045	36.5854	Piscirickettsia salmonis LF-89 = ATCC VR-1361.	Bacteria; Proteobacteria; Gammaproteobacteria; Thiotrichales;Piscirickettsiaceae; Piscirickettsia.	1227812	PSLF89_2004	chromosome	30S ribosomal protein S16	30S ribosomal protein S16 [Piscirickettsia salmonis]_x0001_gb|ERL61541.1| ribosomal protein S16 [Piscirickettsia salmonis LF-89 = ATCC VR-1361]_x0001_gb|KGP96623.1| ribosomal protein S16 [Piscirickettsia salmonis]_x0001_gb|KGP99191.1| ribosomal protein S16 [Piscirickettsia salmonis]	J
A0A0J1JD54	rplS	50S ribosomal protein L19	-17.1367	7.72858	13.0435	Piscirickettsia salmonis LF-89 = ATCC VR-1361.	Bacteria; Proteobacteria; Gammaproteobacteria; Thiotrichales;Piscirickettsiaceae; Piscirickettsia.	1227812	PSLF89_2007	chromosome	50S ribosomal protein L19	50S ribosomal protein L19 [Piscirickettsia salmonis]_x0001_gb|KGP96626.1| 50S ribosomal protein L19 [Piscirickettsia salmonis]	J
A0A0J1JF06	typA	GTP-binding protein TypA	-15.8798	7.5166	3.97351	Piscirickettsia salmonis LF-89 = ATCC VR-1361.	Bacteria; Proteobacteria; Gammaproteobacteria; Thiotrichales;Piscirickettsiaceae; Piscirickettsia.	1227812	PSLF89_203	chromosome	GTP-binding protein TypA	GTP-binding protein TypA [Piscirickettsia salmonis]_x0001_gb|KGP95025.1| GTP-binding protein TypA [Piscirickettsia salmonis]	T	(gi:42560712) tuf (MSC_0160) - translation elongation factor Tu [Mycoplasma mycoides str. PG1]	Adhesins, adherence and adhesion-related proteins
U4TH76	pyrG	CTP synthase	-27.7336	7.52514	6.25	Piscirickettsia salmonis LF-89 = ATCC VR-1361.	Bacteria; Proteobacteria; Gammaproteobacteria; Thiotrichales;Piscirickettsiaceae; Piscirickettsia.	1227812	PSLF89_2043	chromosome	CTP synthetase	CTP synthase [Piscirickettsia salmonis]_x0001_gb|KGP96557.1| CTP synthase [Piscirickettsia salmonis]	F
A0A0J1JB18	eno	Enolase	-115.852	8.23246	25.8824	Piscirickettsia salmonis LF-89 = ATCC VR-1361.	Bacteria; Proteobacteria; Gammaproteobacteria; Thiotrichales;Piscirickettsiaceae; Piscirickettsia.	1227812	PSLF89_2045	chromosome	enolase	hypothetical protein [Piscirickettsia salmonis]_x0001_gb|KGP96559.1| phosphopyruvate hydratase [Piscirickettsia salmonis]	G	(gi:125717729) eno (SSA_0886) - Enolase, putative [Streptococcus sanguinis str. SK36]	Exoenzyme
A0A0J1J7S3	uspA	Universal stress protein	-31.4218	8.11918	25.3425	Piscirickettsia salmonis LF-89 = ATCC VR-1361.	Bacteria; Proteobacteria; Gammaproteobacteria; Thiotrichales;Piscirickettsiaceae; Piscirickettsia.	1227812	PSLF89_2063	chromosome	universal stress family protein	universal stress family protein [Piscirickettsia salmonis]	T
U4TJH1	rpmG	50S ribosomal protein L33	-14.5578	6.99395	29.4118	Piscirickettsia salmonis LF-89 = ATCC VR-1361.	Bacteria; Proteobacteria; Gammaproteobacteria; Thiotrichales;Piscirickettsiaceae; Piscirickettsia.	1227812	PSLF89_207	chromosome	50S ribosomal protein L33	ribosomal protein L33 [Piscirickettsia salmonis]_x0001_gb|ERL62113.1| ribosomal protein L33 [Piscirickettsia salmonis LF-89 = ATCC VR-1361]_x0001_gb|KGP95021.1| ribosomal protein L33 [Piscirickettsia salmonis]_x0001_gb|KGP96492.1| ribosomal protein L33 [Piscirickettsia salmonis]	J
U4T8A1	bfr	Ferroxidase	-41.3542	8.69361	36.129	Piscirickettsia salmonis LF-89 = ATCC VR-1361.	Bacteria; Proteobacteria; Gammaproteobacteria; Thiotrichales;Piscirickettsiaceae; Piscirickettsia.	1227812	PSLF89_2075	chromosome	bacterioferritin	hypothetical protein [Piscirickettsia salmonis]_x0001_gb|KGP96546.1| bacterioferritin [Piscirickettsia salmonis]	P
U4TJI7	ftsZ	Cell division protein FtsZ	-24.1719	8.02777	8.22281	Piscirickettsia salmonis LF-89 = ATCC VR-1361.	Bacteria; Proteobacteria; Gammaproteobacteria; Thiotrichales;Piscirickettsiaceae; Piscirickettsia.	1227812	PSLF89_21	chromosome	cell division protein FtsZ	peptidase M23 [Piscirickettsia salmonis]_x0001_gb|KGP98257.1| peptidase M23 [Piscirickettsia salmonis]	D
A0A0J1JEV1	dut	Deoxyuridine 5'-triphosphate nucleotidohydrolase	-11.4729	7.12669	14.4737	Piscirickettsia salmonis LF-89 = ATCC VR-1361.	Bacteria; Proteobacteria; Gammaproteobacteria; Thiotrichales;Piscirickettsiaceae; Piscirickettsia.	1227812	PSLF89_210	chromosome	deoxyuridine 5'-triphosphate nucleotidohydrolase	deoxyuridine 5'-triphosphate nucleotidohydrolase [Piscirickettsia salmonis]_x0001_gb|KGP95018.1| deoxyuridine 5'-triphosphate nucleotidohydrolase [Piscirickettsia salmonis]	FV
A0A0H4QXE1	algC	AlgC	-40.3253	7.8762	9.15033	Piscirickettsia salmonis LF-89 = ATCC VR-1361.	Bacteria; Proteobacteria; Gammaproteobacteria; Thiotrichales;Piscirickettsiaceae; Piscirickettsia.	1227812	PSLF89_211	chromosome	phosphoglucomutase	hypothetical protein [Piscirickettsia salmonis]_x0001_gb|KGP95017.1| phosphomannomutase/phosphoglucomutase [Piscirickettsia salmonis]	G	(gi:15600515) algC (PA5322) - phosphomannomutase AlgC [Pseudomonas aeruginosa str. PAO1]	Antiphagocytosis, capsule
A0A0H4R230	sufC	Cysteine desulfurase	-13.8848	7.00926	6.77291	Piscirickettsia salmonis LF-89 = ATCC VR-1361.	Bacteria; Proteobacteria; Gammaproteobacteria; Thiotrichales;Piscirickettsiaceae; Piscirickettsia.	1227812	PSLF89_2129	chromosome	Fe-S cluster assembly ATPase SufC	hypothetical protein [Piscirickettsia salmonis]_x0001_gb|KGP97847.1| feS assembly ATPase SufC [Piscirickettsia salmonis]	O
U4TFZ7	sufS	Cysteine desulfurase	-12.9015	7.12869	5.92593	Piscirickettsia salmonis LF-89 = ATCC VR-1361.	Bacteria; Proteobacteria; Gammaproteobacteria; Thiotrichales;Piscirickettsiaceae; Piscirickettsia.	1227812	PSLF89_2131	chromosome	cysteine desulfurase	cysteine desulfurase [Piscirickettsia salmonis]_x0001_gb|KGP96967.1| cysteine desulfurase [Piscirickettsia salmonis]_x0001_gb|KGP97849.1| cysteine desulfurase [Piscirickettsia salmonis]	E
A0A0H4RIR8	udk	Uridine kinase	-11.7161	7.18103	9.90566	Piscirickettsia salmonis LF-89 = ATCC VR-1361.	Bacteria; Proteobacteria; Gammaproteobacteria; Thiotrichales;Piscirickettsiaceae; Piscirickettsia.	1227812	PSLF89_2141	chromosome	uridine kinase	hypothetical protein [Piscirickettsia salmonis]_x0001_gb|KGP97773.1| uridine kinase [Piscirickettsia salmonis]	F
A0A0H4RIS7	ald	Alanine dehydrogenase	-60.6488	8.47803	18.4987	Piscirickettsia salmonis LF-89 = ATCC VR-1361.	Bacteria; Proteobacteria; Gammaproteobacteria; Thiotrichales;Piscirickettsiaceae; Piscirickettsia.	1227812	PSLF89_2154	chromosome	alanine dehydrogenase	hypothetical protein [Piscirickettsia salmonis]_x0001_gb|KGP96945.1| alanine dehydrogenase [Piscirickettsia salmonis]	E
U4TCT7	K661_01120	Thioredoxin-like domain protein	-19.172	7.91155	16.2679	Piscirickettsia salmonis LF-89 = ATCC VR-1361.	Bacteria; Proteobacteria; Gammaproteobacteria; Thiotrichales;Piscirickettsiaceae; Piscirickettsia.	1227812	PSLF89_2164	chromosome	thioredoxin	hypothetical protein [Piscirickettsia salmonis]_x0001_gb|KGP95282.1| thioredoxin-like domain protein [Piscirickettsia salmonis]	O
A0A0H4R1M2	ORFNames=AB894_10325, PSLF89_2187	Carbohydrate kinase	-13.7043	7.40917	6.55738	Piscirickettsia salmonis LF-89 = ATCC VR-1361.	Bacteria; Proteobacteria; Gammaproteobacteria; Thiotrichales;Piscirickettsiaceae; Piscirickettsia.	1227812	PSLF89_2187	chromosome	carbohydrate kinase	carbohydrate kinase [Piscirickettsia salmonis]_x0001_gb|KGP96165.1| carbohydrate kinase [Piscirickettsia salmonis]	G
A0A0J1JDZ2	qmcA	Protease	-16.2249	7.14367	8.82353	Piscirickettsia salmonis LF-89 = ATCC VR-1361.	Bacteria; Proteobacteria; Gammaproteobacteria; Thiotrichales;Piscirickettsiaceae; Piscirickettsia.	1227812	PSLF89_219	chromosome	protease	hypothetical protein [Piscirickettsia salmonis]_x0001_gb|KGP95161.1| protein QmcA [Piscirickettsia salmonis]	O
A0A0J1M2T2	ORFNames=AB894_06365, PSLF89_2210	Sodium:alanine symporter	-14.3534	7.35665	4.52489	Piscirickettsia salmonis LF-89 = ATCC VR-1361.	Bacteria; Proteobacteria; Gammaproteobacteria; Thiotrichales;Piscirickettsiaceae; Piscirickettsia.	1227812	PSLF89_2210	chromosome	sodium:alanine symporter	hypothetical protein [Piscirickettsia salmonis]_x0001_gb|KGP94640.1| amino acid carrier family protein [Piscirickettsia salmonis]	E
U4TE63	clpP	ATP-dependent Clp protease proteolytic subunit	-44.0101	7.82465	23.8095	Piscirickettsia salmonis LF-89 = ATCC VR-1361.	Bacteria; Proteobacteria; Gammaproteobacteria; Thiotrichales;Piscirickettsiaceae; Piscirickettsia.	1227812	PSLF89_2211	chromosome	ATP-dependent Clp protease proteolytic subunit	clp protease family protein [Piscirickettsia salmonis]_x0001_gb|ERL61680.1| clp protease family protein [Piscirickettsia salmonis LF-89 =ATCC VR-1361]_x0001_gb|KGP94641.1| clp protease family protein [Piscirickettsia salmonis]_x0001_gb|KGP96366.1| clp protease family protein [Piscirickettsia salmonis]	O
A0A0H4QVL1	thiC	Phosphomethylpyrimidine synthase	-40.2587	7.48497	8.77193	Piscirickettsia salmonis LF-89 = ATCC VR-1361.	Bacteria; Proteobacteria; Gammaproteobacteria; Thiotrichales;Piscirickettsiaceae; Piscirickettsia.	1227812	PSLF89_222	chromosome	thiamine biosynthesis protein ThiC	thiamine biosynthesis protein ThiC [Piscirickettsia salmonis]_x0001_gb|KGP95164.1| thiamine biosynthesis protein ThiC [Piscirickettsia salmonis]	H
A0A0H4QXR0	hisC	Histidinol-phosphate aminotransferase	-4.09068	5.62159	1.89702	Piscirickettsia salmonis LF-89 = ATCC VR-1361.	Bacteria; Proteobacteria; Gammaproteobacteria; Thiotrichales;Piscirickettsiaceae; Piscirickettsia.	1227812	PSLF89_224	chromosome	aspartate aminotransferase	aspartate aminotransferase [Piscirickettsia salmonis]_x0001_gb|KGP95166.1| aspartate aminotransferase [Piscirickettsia salmonis]	E
A0A0J1JEB2	AB894_03180	Aspartyl-tRNA synthetase	-35.5874	7.72082	7.47029	Piscirickettsia salmonis LF-89 = ATCC VR-1361.	Bacteria; Proteobacteria; Gammaproteobacteria; Thiotrichales;Piscirickettsiaceae; Piscirickettsia.	1227812	PSLF89_2257	chromosome	aspartate--tRNA ligase	aspartyl-tRNA synthetase [Piscirickettsia salmonis]_x0001_gb|KGP97043.1| aspartate--tRNA ligase [Piscirickettsia salmonis]	J
A0A0J1JEE7	ORFNames=AB894_03050, PSLF89_2274	DSBA oxidoreductase	-18.1057	8.21868	8	Piscirickettsia salmonis LF-89 = ATCC VR-1361.	Bacteria; Proteobacteria; Gammaproteobacteria; Thiotrichales;Piscirickettsiaceae; Piscirickettsia.	1227812	PSLF89_2274	chromosome	disulfide bond formation protein DsbA	hypothetical protein [Piscirickettsia salmonis]_x0001_gb|KGP95619.1| DSBA-like thioredoxin domain protein [Piscirickettsia salmonis]	O
U4TJF0	deaD	ATP-dependent RNA helicase DeaD	-46.9598	7.60146	7.15474	Piscirickettsia salmonis LF-89 = ATCC VR-1361.	Bacteria; Proteobacteria; Gammaproteobacteria; Thiotrichales;Piscirickettsiaceae; Piscirickettsia.	1227812	PSLF89_2287	chromosome	DEAD/DEAH box helicase	hypothetical protein, partial [Piscirickettsia salmonis]_x0001_gb|KGP96956.1| helicase conserved C-terminal domain protein [Piscirickettsia salmonis]	L
A0A0J1J8I7	ORFNames=AB894_13655, PSLF89_2295	Uncharacterized protein	-111.387	8.30771	24.8485	Piscirickettsia salmonis LF-89 = ATCC VR-1361.	Bacteria; Proteobacteria; Gammaproteobacteria; Thiotrichales;Piscirickettsiaceae; Piscirickettsia.	1227812	PSLF89_2295	chromosome	hypothetical protein	hypothetical protein [Piscirickettsia salmonis]_x0001_gb|KGP96930.1| FHA domain protein [Piscirickettsia salmonis]	TU	(gi:152985795) fha1 (PSPA7_0152) - hypothetical protein [Pseudomonas aeruginosa str. PA7]	Secretion system
A0A0H4REE7	maeB	MaeB	-14.627	7.56596	2.84238	Piscirickettsia salmonis LF-89 = ATCC VR-1361.	Bacteria; Proteobacteria; Gammaproteobacteria; Thiotrichales;Piscirickettsiaceae; Piscirickettsia.	1227812	PSLF89_234	chromosome	malate dehydrogenase	hypothetical protein [Piscirickettsia salmonis]_x0001_gb|KGP96940.1| malic enzyme, NAD binding domain protein [Piscirickettsia salmonis]	C
A0A0J1M3L7	ORFNames=AB894_04775, PSLF89_2398	Uncharacterized protein	-5.7595	7.6793	2.64766	Piscirickettsia salmonis LF-89 = ATCC VR-1361.	Bacteria; Proteobacteria; Gammaproteobacteria; Thiotrichales;Piscirickettsiaceae; Piscirickettsia.	1227812	PSLF89_2398	chromosome	hypothetical protein	hypothetical protein [Piscirickettsia salmonis]_x0001_gb|KGP97478.1| cation-binding protein [Piscirickettsia salmonis]	No orthologs found
U4TJU4	sodB	Superoxide dismutase	-37.9912	8.1704	34.5361	Piscirickettsia salmonis LF-89 = ATCC VR-1361.	Bacteria; Proteobacteria; Gammaproteobacteria; Thiotrichales;Piscirickettsiaceae; Piscirickettsia.	1227812	PSLF89_2443	chromosome	superoxide dismutase	superoxide dismutase [Piscirickettsia salmonis]_x0001_gb|KGP95895.1| superoxide dismutase [Piscirickettsia salmonis]	P	(gi:118469767) sodA (MSMEG_6427) - [Mn] superoxide dismutase [Mycobacterium smegmatis str. MC2 155]	Stress adaptation
A0A0J1JAT9	comL	Outer membrane protein assembly factor BamD	-12.1378	7.43667	5.38462	Piscirickettsia salmonis LF-89 = ATCC VR-1361.	Bacteria; Proteobacteria; Gammaproteobacteria; Thiotrichales;Piscirickettsiaceae; Piscirickettsia.	1227812	PSLF89_2505	chromosome	outer membrane assembly lipoyfio family protein	hypothetical protein [Piscirickettsia salmonis]_x0001_gb|KGP95002.1| outer membrane assembly lipoYfiO family protein [Piscirickettsia salmonis]	M
A0A0H4R121	serA	D-3-phosphoglycerate dehydrogenase	-13.0853	7.58489	6.34146	Piscirickettsia salmonis LF-89 = ATCC VR-1361.	Bacteria; Proteobacteria; Gammaproteobacteria; Thiotrichales;Piscirickettsiaceae; Piscirickettsia.	1227812	PSLF89_2523	chromosome	D-3-phosphoglycerate dehydrogenase	hypothetical protein [Piscirickettsia salmonis]_x0001_gb|KGP95672.1| NAD binding domain of 6-phosphogluconate dehydrogenase family protein [Piscirickettsia salmonis]	HR
U4TJQ4	tpiA	Triosephosphate isomerase	-12.6953	7.94339	11.8577	Piscirickettsia salmonis LF-89 = ATCC VR-1361.	Bacteria; Proteobacteria; Gammaproteobacteria; Thiotrichales;Piscirickettsiaceae; Piscirickettsia.	1227812	PSLF89_253	chromosome	triose-phosphate isomerase	hypothetical protein [Piscirickettsia salmonis]_x0001_gb|KGP98421.1| triose-phosphate isomerase [Piscirickettsia salmonis]	G
A0A0J1JCA0	fabV	Enoyl-[acyl-carrier-protein] reductase [NADH]	-27.1161	7.31693	7.26817	Piscirickettsia salmonis LF-89 = ATCC VR-1361.	Bacteria; Proteobacteria; Gammaproteobacteria; Thiotrichales;Piscirickettsiaceae; Piscirickettsia.	1227812	PSLF89_2538	chromosome	trans-2-enoyl-CoA reductase	hypothetical protein [Piscirickettsia salmonis]_x0001_gb|KGP94479.1| NAD(P)H binding domain of trans-2-enoyl-CoA reductase family protein [Piscirickettsia salmonis]	I
A0A0H4R2A4	ppiB	Peptidyl-prolyl cis-trans isomerase	-16.3571	8.15529	20.8092	Piscirickettsia salmonis LF-89 = ATCC VR-1361.	Bacteria; Proteobacteria; Gammaproteobacteria; Thiotrichales;Piscirickettsiaceae; Piscirickettsia.	1227812	PSLF89_2562	chromosome	cyclophilin	cyclophilin [Piscirickettsia salmonis]_x0001_gb|KGP95636.1| cyclophilin [Piscirickettsia salmonis]	O	(gi:15900665) slrA (SP_0771) - peptidyl-prolyl cis-trans isomerase, cyclophilin-type [Streptococcus pneumoniae str. TIGR4 (serotype 4)]	Adhesins, adherence and adhesion-related proteins
A0A0J1M3G4	qseB	QseB	-38.0497	7.46425	21.9178	Piscirickettsia salmonis LF-89 = ATCC VR-1361.	Bacteria; Proteobacteria; Gammaproteobacteria; Thiotrichales;Piscirickettsiaceae; Piscirickettsia.	1227812	PSLF89_2576	chromosome	two-component system response regulator	regulator [Piscirickettsia salmonis]_x0001_gb|KGP94977.1| regulator [Piscirickettsia salmonis]	TK	(gi:169628171) mprA (MAB_1076) - two component response transcriptional regulatory protein MprA [Mycobacterium abscessus str. ATCC 19977]	Regulation
A0A0J1M362	nuoD	NADH-quinone oxidoreductase subunit D	-34.6738	7.6538	10.3118	Piscirickettsia salmonis LF-89 = ATCC VR-1361.	Bacteria; Proteobacteria; Gammaproteobacteria; Thiotrichales;Piscirickettsiaceae; Piscirickettsia.	1227812	PSLF89_259	chromosome	NADH dehydrogenase	NADH dehydrogenase subunit D [Piscirickettsia salmonis]_x0001_gb|KGP98426.1| NADH dehydrogenase subunit D [Piscirickettsia salmonis]	C
U4TPC4	lepA	Elongation factor 4	-9.46188	6.47894	3.5	Piscirickettsia salmonis LF-89 = ATCC VR-1361.	Bacteria; Proteobacteria; Gammaproteobacteria; Thiotrichales;Piscirickettsiaceae; Piscirickettsia.	1227812	PSLF89_2600	chromosome	elongation factor 4	elongation factor 4 [Piscirickettsia salmonis]_x0001_gb|KGP98565.1| elongation factor 4 [Piscirickettsia salmonis]	J
A0A0H4QXH5	nuoG	NADH-quinone oxidoreductase	-21.0416	8.11498	5.5207	Piscirickettsia salmonis LF-89 = ATCC VR-1361.	Bacteria; Proteobacteria; Gammaproteobacteria; Thiotrichales;Piscirickettsiaceae; Piscirickettsia.	1227812	PSLF89_262	chromosome	NADH dehydrogenase	hypothetical protein [Piscirickettsia salmonis]_x0001_gb|KGP98429.1| NADH dehydrogenase (quinone), G subunit [Piscirickettsia salmonis]	C	(gi:169629226) nuoG (MAB_2140) - NADH dehydrogenase subunit G [Mycobacterium abscessus str. ATCC 19977]	Anti-apoptosis factor
U4TGX7	rplI	50S ribosomal protein L9	-20.3928	7.7407	11.3333	Piscirickettsia salmonis LF-89 = ATCC VR-1361.	Bacteria; Proteobacteria; Gammaproteobacteria; Thiotrichales;Piscirickettsiaceae; Piscirickettsia.	1227812	PSLF89_2633	chromosome	50S ribosomal protein L9	50S ribosomal protein L9 [Piscirickettsia salmonis]_x0001_gb|KGP98619.1| 50S ribosomal protein L9 [Piscirickettsia salmonis]	J
A0A0H4RJP9	aroC	Chorismate synthase	-12.8948	6.83358	5.27778	Piscirickettsia salmonis LF-89 = ATCC VR-1361.	Bacteria; Proteobacteria; Gammaproteobacteria; Thiotrichales;Piscirickettsiaceae; Piscirickettsia.	1227812	PSLF89_2639	chromosome	chorismate synthase	chorismate synthase [Piscirickettsia salmonis]_x0001_gb|KGP98625.1| chorismate synthase [Piscirickettsia salmonis]	E
U4T8K9	K661_03171	AT hook motif family protein	-35.1407	7.39794	12.844	Piscirickettsia salmonis LF-89 = ATCC VR-1361.	Bacteria; Proteobacteria; Gammaproteobacteria; Thiotrichales;Piscirickettsiaceae; Piscirickettsia.	1227812	PSLF89_2654	chromosome	AT hook motif family protein	hypothetical protein [Piscirickettsia salmonis]	No orthologs found
A0A0J1JF43	AB894_01510	Succinyldiaminopimelate aminotransferase	-90.3593	8.30826	31.2268	Piscirickettsia salmonis LF-89 = ATCC VR-1361.	Bacteria; Proteobacteria; Gammaproteobacteria; Thiotrichales;Piscirickettsiaceae; Piscirickettsia.	1227812	PSLF89_2664	chromosome	succinyldiaminopimelate aminotransferase	succinyldiaminopimelate aminotransferase [Piscirickettsia salmonis]_x0001_gb|KGP94928.1| succinyldiaminopimelate aminotransferase [Piscirickettsia salmonis]	R
A0A0J1J7X3	icd	Isocitrate dehydrogenase [NADP]	-74.6127	8.63658	25.3012	Piscirickettsia salmonis LF-89 = ATCC VR-1361.	Bacteria; Proteobacteria; Gammaproteobacteria; Thiotrichales;Piscirickettsiaceae; Piscirickettsia.	1227812	PSLF89_2677	chromosome	isocitrate dehydrogenase	isocitrate dehydrogenase [Piscirickettsia salmonis]_x0001_gb|KGP94694.1| isocitrate dehydrogenase [Piscirickettsia salmonis]	C
U4THC7	nusA	Transcription termination/antitermination protein NusA	-27.4825	7.40277	7.92079	Piscirickettsia salmonis LF-89 = ATCC VR-1361.	Bacteria; Proteobacteria; Gammaproteobacteria; Thiotrichales;Piscirickettsiaceae; Piscirickettsia.	1227812	PSLF89_272	chromosome	transcription elongation factor NusA	transcription termination factor NusA [Piscirickettsia salmonis]_x0001_gb|KGP98438.1| transcription elongation protein nusA [Piscirickettsia salmonis]	R
A0A0J1M371	infB	Translation initiation factor IF-2	-106.352	8.59022	11.8967	Piscirickettsia salmonis LF-89 = ATCC VR-1361.	Bacteria; Proteobacteria; Gammaproteobacteria; Thiotrichales;Piscirickettsiaceae; Piscirickettsia.	1227812	PSLF89_273	chromosome	translation initiation factor IF-2	translation initiation factor IF-2 [Piscirickettsia salmonis]_x0001_gb|KGP98439.1| translation initiation factor IF-2 [Piscirickettsia salmonis]	M
A0A0J1JD70	ORFNames=AB894_05275, PSLF89_2750	Uncharacterized protein	-5.28251	7.21281	2.40175	Piscirickettsia salmonis LF-89 = ATCC VR-1361.	Bacteria; Proteobacteria; Gammaproteobacteria; Thiotrichales;Piscirickettsiaceae; Piscirickettsia.	1227812	PSLF89_2750	chromosome	hypothetical protein	hypothetical protein [Piscirickettsia salmonis]_x0001_gb|KGP95203.1| glycosyl transferase family 2 [Piscirickettsia salmonis]	No orthologs found
A0A0H4QXV5	pnp	Polyribonucleotide nucleotidyltransferase	-107.708	8.52039	16.4592	Piscirickettsia salmonis LF-89 = ATCC VR-1361.	Bacteria; Proteobacteria; Gammaproteobacteria; Thiotrichales;Piscirickettsiaceae; Piscirickettsia.	1227812	PSLF89_277	chromosome	polyribonucleotide nucleotidyltransferase	hypothetical protein [Piscirickettsia salmonis]_x0001_gb|KGP98443.1| polyribonucleotide nucleotidyltransferase [Piscirickettsia salmonis]	J
A0A0J1JE68	ORFNames=AB894_03385, PSLF89_2790	Uncharacterized protein	-5.55722	7.33695	6.6474	Piscirickettsia salmonis LF-89 = ATCC VR-1361.	Bacteria; Proteobacteria; Gammaproteobacteria; Thiotrichales;Piscirickettsiaceae; Piscirickettsia.	1227812	PSLF89_2790	chromosome	hypothetical protein	putative PAS/PAC sensor protein [Piscirickettsia salmonis]	No orthologs found
U4TFN9	ORFNames=AB894_10445, K661_00656	Chemotaxis protein CheY	-12.7247	7.72016	15.1899	Piscirickettsia salmonis LF-89 = ATCC VR-1361.	Bacteria; Proteobacteria; Gammaproteobacteria; Thiotrichales;Piscirickettsiaceae; Piscirickettsia.	1227812	PSLF89_2798	chromosome	two-component system response regulator	two-component transcriptional regulatory family protein [Piscirickettsia salmonis]_x0001_gb|ERL62969.1| two-component transcriptional regulatory family protein [Piscirickettsia salmonis LF-89 = ATCC VR-1361]_x0001_gb|KGP97729.1| two-component transcriptional regulatory family protein [Piscirickettsia salmonis]_x0001_gb|KGP99687.1| two-component transcriptional regulatory family protein [Piscirick…	TK	(gi:183984499) mprA (MMAR_4529) - two component response transcriptional regulatory protein MprA [Mycobacterium marinum str. M]	Regulation
U4TN04	sppA	Signal peptide peptidase SppA, 36K type	-12.9044	6.38609	3.84615	Piscirickettsia salmonis LF-89 = ATCC VR-1361.	Bacteria; Proteobacteria; Gammaproteobacteria; Thiotrichales;Piscirickettsiaceae; Piscirickettsia.	1227812	PSLF89_2803	chromosome	peptidase S49	peptidase S49 [Piscirickettsia salmonis]	O
A0A0H4R1K7	ORFNames=AB894_10485, PSLF89_2806	NAD-glutamate dehydrogenase	-25.1731	7.36481	2.76413	Piscirickettsia salmonis LF-89 = ATCC VR-1361.	Bacteria; Proteobacteria; Gammaproteobacteria; Thiotrichales;Piscirickettsiaceae; Piscirickettsia.	1227812	PSLF89_2806	chromosome	NAD-glutamate dehydrogenase	hypothetical protein [Piscirickettsia salmonis]_x0001_gb|KGP97737.1| NAD-specific glutamate dehydrogenase [Piscirickettsia salmonis]	E
A0A0J1JD06	ORFNames=AB894_05755, PSLF89_281	Phasin family protein	-63.4886	8.8042	48.5294	Piscirickettsia salmonis LF-89 = ATCC VR-1361.	Bacteria; Proteobacteria; Gammaproteobacteria; Thiotrichales;Piscirickettsiaceae; Piscirickettsia.	1227812	PSLF89_281	chromosome	phasin family protein	hypothetical protein [Piscirickettsia salmonis]_x0001_gb|KGP98447.1| phasin family protein [Piscirickettsia salmonis]	No orthologs found
A0A0J1JAE1	ORFNames=AB894_10530, PSLF89_2816	Meta-pathway of phenol degradation family protein	-19.7298	6.39118	11.1111	Piscirickettsia salmonis LF-89 = ATCC VR-1361.	Bacteria; Proteobacteria; Gammaproteobacteria; Thiotrichales;Piscirickettsiaceae; Piscirickettsia.	1227812	PSLF89_2816	chromosome	meta-pathway of phenol degradation family protein	hypothetical protein [Piscirickettsia salmonis]_x0001_gb|KGP97746.1| metA-pathway of phenol degradation family protein [Piscirickettsia salmonis]	M
A0A0J1JD07	phaR	PhaR	-38.8422	8.50806	26.9006	Piscirickettsia salmonis LF-89 = ATCC VR-1361.	Bacteria; Proteobacteria; Gammaproteobacteria; Thiotrichales;Piscirickettsiaceae; Piscirickettsia.	1227812	PSLF89_282	chromosome	poly(3-hydroxybutyrate) depolymerase	hypothetical protein [Piscirickettsia salmonis]_x0001_gb|KGP98448.1| polyhydroxyalkanoate synthesis repressor PhaR [Piscirickettsia salmonis]	QT
A0A0J1M381	phbB	3-ketoacyl-ACP reductase	-89.552	8.57181	35.2	Piscirickettsia salmonis LF-89 = ATCC VR-1361.	Bacteria; Proteobacteria; Gammaproteobacteria; Thiotrichales;Piscirickettsiaceae; Piscirickettsia.	1227812	PSLF89_283	chromosome	beta-ketoacyl-ACP reductase	hypothetical protein [Piscirickettsia salmonis]_x0001_gb|KGP98449.1| 3-ketoacyl-ACP reductase [Piscirickettsia salmonis]	IQR	(gi:25010702) cylG (gbs0646) - hypothetical protein [Streptococcus agalactiae str. NEM316 (serotype III)]	Toxin, efector protein
U4TKR0	astB	N-succinylarginine dihydrolase	-11.5588	7.23037	5.17241	Piscirickettsia salmonis LF-89 = ATCC VR-1361.	Bacteria; Proteobacteria; Gammaproteobacteria; Thiotrichales;Piscirickettsiaceae; Piscirickettsia.	1227812	PSLF89_2839	chromosome	succinylarginine dihydrolase	hypothetical protein [Piscirickettsia salmonis]_x0001_gb|KGP95506.1| succinylarginine dihydrolase [Piscirickettsia salmonis]	E
A0A0J1JD21	phbA	Acetyl-CoA acetyltransferase	-69.6013	8.90416	23.4694	Piscirickettsia salmonis LF-89 = ATCC VR-1361.	Bacteria; Proteobacteria; Gammaproteobacteria; Thiotrichales;Piscirickettsiaceae; Piscirickettsia.	1227812	PSLF89_284	chromosome	acetyl-CoA acetyltransferase	hypothetical protein [Piscirickettsia salmonis]_x0001_gb|KGP98450.1| acetyl-CoA C-acetyltransferase family protein [Piscirickettsia salmonis]	I
A0A0H4R1R9	astD	N-succinylglutamate 5-semialdehyde dehydrogenase	-52.6716	8.25317	19.6721	Piscirickettsia salmonis LF-89 = ATCC VR-1361.	Bacteria; Proteobacteria; Gammaproteobacteria; Thiotrichales;Piscirickettsiaceae; Piscirickettsia.	1227812	PSLF89_2840	chromosome	N-succinylglutamate 5-semialdehyde dehydrogenase	hypothetical protein [Piscirickettsia salmonis]_x0001_gb|KGP95505.1| succinylglutamic semialdehyde dehydrogenase [Piscirickettsia salmonis]	C
A0A0H4RK67	gmk	Guanylate kinase	-13.1422	6.83766	5.82524	Piscirickettsia salmonis LF-89 = ATCC VR-1361.	Bacteria; Proteobacteria; Gammaproteobacteria; Thiotrichales;Piscirickettsiaceae; Piscirickettsia.	1227812	PSLF89_2847	chromosome	guanylate kinase	guanylate kinase [Piscirickettsia salmonis]_x0001_gb|KGP95499.1| guanylate kinase [Piscirickettsia salmonis]	F
U4TED5	rpoZ	DNA-directed RNA polymerase subunit omega	-15.5657	7.49073	33.8235	Piscirickettsia salmonis LF-89 = ATCC VR-1361.	Bacteria; Proteobacteria; Gammaproteobacteria; Thiotrichales;Piscirickettsiaceae; Piscirickettsia.	1227812	PSLF89_2848	chromosome	DNA-directed RNA polymerase subunit omega	DNA-directed RNA polymerase, omega subunit [Piscirickettsia salmonis]_x0001_gb|ERL62539.1| DNA-directed RNA polymerase, omega subunit [Piscirickettsia salmonis LF-89 = ATCC VR-1361]_x0001_gb|KGP95498.1| DNA-directed RNA polymerase, omega subunit [Piscirickettsia salmonis]_x0001_gb|KGP98110.1| DNA-directed RNA polymerase, omega subunit [Piscirickettsia salmonis]	K
A0A0J1JE88	glyA	Serine hydroxymethyltransferase	-128.053	8.47981	31.7308	Piscirickettsia salmonis LF-89 = ATCC VR-1361.	Bacteria; Proteobacteria; Gammaproteobacteria; Thiotrichales;Piscirickettsiaceae; Piscirickettsia.	1227812	PSLF89_2875	chromosome	serine hydroxymethyltransferase	serine hydroxymethyltransferase [Piscirickettsia salmonis]_x0001_gb|KGP97072.1| serine hydroxymethyltransferase [Piscirickettsia salmonis]	E
A0A0H4R5M9	yjjK	YjjK	-27.3539	8.0288	9.66011	Piscirickettsia salmonis LF-89 = ATCC VR-1361.	Bacteria; Proteobacteria; Gammaproteobacteria; Thiotrichales;Piscirickettsiaceae; Piscirickettsia.	1227812	PSLF89_2876	chromosome	ABC transporter ATP-binding protein	heme ABC transporter ATP-binding protein [Piscirickettsia salmonis]	R	(gi:68535383) hmuV (jk0318) - putative iron ABC transport system, ATP-binding protein [Corynebacterium jeikeium str. K411]	Metal uptake and heme acquisition
A0A0H4R5N9	rpsA	30S ribosomal protein S1	-104.047	8.07151	10.7547	Piscirickettsia salmonis LF-89 = ATCC VR-1361.	Bacteria; Proteobacteria; Gammaproteobacteria; Thiotrichales;Piscirickettsiaceae; Piscirickettsia.	1227812	PSLF89_2891	chromosome	30S ribosomal protein S1	30S ribosomal protein S1 [Piscirickettsia salmonis]_x0001_gb|KGP95128.1| 30S ribosomal protein S1 [Piscirickettsia salmonis]	J
A0A0J1JDH8	gyrA	DNA gyrase subunit A	-38.8466	8.22086	6.37813	Piscirickettsia salmonis LF-89 = ATCC VR-1361.	Bacteria; Proteobacteria; Gammaproteobacteria; Thiotrichales;Piscirickettsiaceae; Piscirickettsia.	1227812	PSLF89_2894	chromosome	DNA gyrase subunit A	DNA gyrase subunit A [Piscirickettsia salmonis]	L
A0A0H4R3L5	carA	Carbamoyl-phosphate synthase small chain	-50.3111	8.33769	20.2279	Piscirickettsia salmonis LF-89 = ATCC VR-1361.	Bacteria; Proteobacteria; Gammaproteobacteria; Thiotrichales;Piscirickettsiaceae; Piscirickettsia.	1227812	PSLF89_2912	chromosome	carbamoyl-phosphate synthase small subunit	hypothetical protein [Piscirickettsia salmonis]_x0001_gb|KGP94863.1| carbamoyl-phosphate synthase, small subunit [Piscirickettsia salmonis]	EF
A0A0H4R313	caD	Carbamoyl-phosphate synthase (glutamine-hydrolyzing)	-169.495	8.5125	19.1329	Piscirickettsia salmonis LF-89 = ATCC VR-1361.	Bacteria; Proteobacteria; Gammaproteobacteria; Thiotrichales;Piscirickettsiaceae; Piscirickettsia.	1227812	PSLF89_2913	chromosome	carbamoyl phosphate synthase large subunit	carbamoyl phosphate synthase large subunit [Piscirickettsia salmonis]_x0001_gb|KGP94862.1| carbamoyl phosphate synthase large subunit [Piscirickettsia salmonis]	EF
A0A0H4RKB4	umpS	Orotidine 5'-phosphate decarboxylase	-45.9883	8.07777	26.4822	Piscirickettsia salmonis LF-89 = ATCC VR-1361.	Bacteria; Proteobacteria; Gammaproteobacteria; Thiotrichales;Piscirickettsiaceae; Piscirickettsia.	1227812	PSLF89_2916	chromosome	orotidine 5'-phosphate decarboxylase	hypothetical protein [Piscirickettsia salmonis]_x0001_gb|KGP94859.1| uridine 5'-monophosphate synthase [Piscirickettsia salmonis]	F
A0A0H4R3M0	clpB	Chaperone protein ClpB	-101.973	8.42334	14.4186	Piscirickettsia salmonis LF-89 = ATCC VR-1361.	Bacteria; Proteobacteria; Gammaproteobacteria; Thiotrichales;Piscirickettsiaceae; Piscirickettsia.	1227812	PSLF89_2917	chromosome	ATP-dependent chaperone ClpB	protein disaggregation chaperone [Piscirickettsia salmonis]_x0001_gb|KGP94858.1| protein disaggregation chaperone [Piscirickettsia salmonis]	O	(gi:229593390) clpV1 (PFLU6025) - chaperone [Pseudomonas fluorescens str. SBW25]	Secretion system
A0A0H4R1Z0	metG	Methionine--tRNA ligase	-4.51049	7.55131	2.30769	Piscirickettsia salmonis LF-89 = ATCC VR-1361.	Bacteria; Proteobacteria; Gammaproteobacteria; Thiotrichales;Piscirickettsiaceae; Piscirickettsia.	1227812	PSLF89_2928	chromosome	methionine--tRNA ligase	methionine--tRNA ligase [Piscirickettsia salmonis]_x0001_gb|KGP94661.1| methionine--tRNA ligase [Piscirickettsia salmonis]	J
U4TJI1	mip	Peptidyl-prolyl cis-trans isomerase	-34.2697	7.27215	15.8301	Piscirickettsia salmonis LF-89 = ATCC VR-1361.	Bacteria; Proteobacteria; Gammaproteobacteria; Thiotrichales;Piscirickettsiaceae; Piscirickettsia.	1227812	PSLF89_2952	chromosome	peptidylprolyl isomerase	hypothetical protein [Piscirickettsia salmonis]_x0001_gb|KGP95086.1| peptidyl-prolyl cis-trans isomerase Mip [Piscirickettsia salmonis]	O	(gi:54296815) mip (lpp0855) - macrophage infectivity potentiator [Legionella pneumophila str. Paris]	Invasion, intracellular survival
U4THK3	K661_02207	GlcNAc-PI de-N-acetylase family protein	-17.1427	7.03042	6.31579	Piscirickettsia salmonis LF-89 = ATCC VR-1361.	Bacteria; Proteobacteria; Gammaproteobacteria; Thiotrichales;Piscirickettsiaceae; Piscirickettsia.	1227812	PSLF89_2954	chromosome	GlcNAc-PI de-N-acetylase	hypothetical protein [Piscirickettsia salmonis]_x0001_gb|KGP95866.1| glcNAc-PI de-N-acetylase family protein [Piscirickettsia salmonis]	G
A0A0H4R3P3	ORFNames=AB894_06870, PSLF89_2957	Glutamine--fructose-6-phosphate transaminase	-11.6645	6.97349	4.08163	Piscirickettsia salmonis LF-89 = ATCC VR-1361.	Bacteria; Proteobacteria; Gammaproteobacteria; Thiotrichales;Piscirickettsiaceae; Piscirickettsia.	1227812	PSLF89_2957	chromosome	sugar isomerase	hypothetical protein [Piscirickettsia salmonis]_x0001_gb|KGP95863.1| SIS domain protein [Piscirickettsia salmonis]	M
A0A0H4R218	ORFNames=AB894_03875, PSLF89_2966	2OG-Fe(II) oxygenase	-10.073	6.94091	3.92857	Piscirickettsia salmonis LF-89 = ATCC VR-1361.	Bacteria; Proteobacteria; Gammaproteobacteria; Thiotrichales;Piscirickettsiaceae; Piscirickettsia.	1227812	PSLF89_2966	chromosome	2OG-Fe(II) oxygenase	hypothetical protein [Piscirickettsia salmonis]_x0001_gb|KGP95142.1| oxidoreductase, iron/ascorbate family [Piscirickettsia salmonis]	Q
A0A0H4R5Z8	PSLF89_2980	Uncharacterized protein	-6.20761	7.49651	3.8055	Piscirickettsia salmonis LF-89 = ATCC VR-1361.	Bacteria; Proteobacteria; Gammaproteobacteria; Thiotrichales;Piscirickettsiaceae; Piscirickettsia.	1227812	PSLF89_2980	chromosome	hypothetical protein	hypothetical protein KU39_00575 [Piscirickettsia salmonis]	No orthologs found
U4TH92	K661_02348	CobQ/CobB/MinD/ParA nucleotide binding domain protein	-10.8778	6.78777	7.38462	Piscirickettsia salmonis LF-89 = ATCC VR-1361.	Bacteria; Proteobacteria; Gammaproteobacteria; Thiotrichales;Piscirickettsiaceae; Piscirickettsia.	1227812	PSLF89_2p2	pPSLF89-2	hypothetical protein	hypothetical protein [Piscirickettsia salmonis]_x0001_gb|KGP95663.1| cobQ/CobB/MinD/ParA nucleotide binding domain protein [Piscirickettsia salmonis]	D	(gi:118474588) flhG (CFF8240_1509) - ATPase, ParA family [Campylobacter fetus str. 82-40 (subsp. fetus)]	Motility and export apparatus
U4TIF4	K661_02221	Uncharacterized protein	-4.45734	6.82039	7.37327	Piscirickettsia salmonis LF-89 = ATCC VR-1361.	Bacteria; Proteobacteria; Gammaproteobacteria; Thiotrichales;Piscirickettsiaceae; Piscirickettsia.	1227812	PSLF89_2p37	pPSLF89-2	hypothetical protein	hypothetical protein [Piscirickettsia salmonis]_x0001_gb|KGP95656.1| restriction endonuclease subunit S [Piscirickettsia salmonis]	No orthologs found
A0A0H4R372	prs	Ribose-phosphate pyrophosphokinase	-5.34047	7.04669	3.85852	Piscirickettsia salmonis LF-89 = ATCC VR-1361.	Bacteria; Proteobacteria; Gammaproteobacteria; Thiotrichales;Piscirickettsiaceae; Piscirickettsia.	1227812	PSLF89_3004	chromosome	ribose-phosphate pyrophosphokinase	ribose-phosphate pyrophosphokinase [Piscirickettsia salmonis]	FE
U4TJV9	rplY	50S ribosomal protein L25	-28.5846	8.26732	22.5962	Piscirickettsia salmonis LF-89 = ATCC VR-1361.	Bacteria; Proteobacteria; Gammaproteobacteria; Thiotrichales;Piscirickettsiaceae; Piscirickettsia.	1227812	PSLF89_3005	chromosome	50S ribosomal protein L25	hypothetical protein [Piscirickettsia salmonis]_x0001_gb|KGP95331.1| ribosomal protein L25, Ctc-form [Piscirickettsia salmonis]	J
A0A0H4R3S0	mtn	5'-methylthioadenosine/S-adenosylhomocysteine nucleosidase 2	-12.5133	6.96978	5.06329	Piscirickettsia salmonis LF-89 = ATCC VR-1361.	Bacteria; Proteobacteria; Gammaproteobacteria; Thiotrichales;Piscirickettsiaceae; Piscirickettsia.	1227812	PSLF89_3008	chromosome	nucleosidase	hypothetical protein [Piscirickettsia salmonis]_x0001_gb|KGP95334.1| MTA/SAH nucleosidase [Piscirickettsia salmonis]	F
A0A0J1J8A9	gcsB	Probable glycine dehydrogenase (decarboxylating) subunit 2	-40.4849	7.87584	10.2249	Piscirickettsia salmonis LF-89 = ATCC VR-1361.	Bacteria; Proteobacteria; Gammaproteobacteria; Thiotrichales;Piscirickettsiaceae; Piscirickettsia.	1227812	PSLF89_3025	chromosome	glycine dehydrogenase	hypothetical protein [Piscirickettsia salmonis]_x0001_gb|KGP97335.1| aminotransferase class-V family protein [Piscirickettsia salmonis]	E
A0A0H4R3T0	gcvPA	Probable glycine dehydrogenase (decarboxylating) subunit 1	-56.2252	8.03641	13.1004	Piscirickettsia salmonis LF-89 = ATCC VR-1361.	Bacteria; Proteobacteria; Gammaproteobacteria; Thiotrichales;Piscirickettsiaceae; Piscirickettsia.	1227812	PSLF89_3026	chromosome	glycine dehydrogenase	glycine dehydrogenase [Piscirickettsia salmonis]_x0001_gb|KGP97334.1| glycine dehydrogenase [Piscirickettsia salmonis]	E
U4TMY8	rfaD	ADP-L-glycero-D-manno-heptose-6-epimerase	-64.5012	8.03012	28.5714	Piscirickettsia salmonis LF-89 = ATCC VR-1361.	Bacteria; Proteobacteria; Gammaproteobacteria; Thiotrichales;Piscirickettsiaceae; Piscirickettsia.	1227812	PSLF89_3030	chromosome	ADP-L-glycero-D-mannoheptose-6-epimerase	hypothetical protein [Piscirickettsia salmonis]_x0001_gb|KGP97330.1| ADP-glyceromanno-heptose 6-epimerase [Piscirickettsia salmonis]	M	(gi:170718537) rfaD (HSM_0397) - ADP-L-glycero-D-manno-heptose-6-epimerase [Haemophilus somnus str. 2336]	Endotoxin
U4TFK5	phoR	Histidine kinase	-16.1192	6.92859	6.97674	Piscirickettsia salmonis LF-89 = ATCC VR-1361.	Bacteria; Proteobacteria; Gammaproteobacteria; Thiotrichales;Piscirickettsiaceae; Piscirickettsia.	1227812	PSLF89_3051	chromosome	PAS domain-containing sensor histidine kinase	hypothetical protein [Piscirickettsia salmonis]_x0001_gb|KGP93827.1| phosphate regulon sensor kinase PhoR [Piscirickettsia salmonis]	T	(gi:183984909) phoR (MMAR_4941) - two-component system response phosphate sensor kinase, PhoR [Mycobacterium marinum str. M]	Regulation
U4TE45	fabF	3-oxoacyl-[acyl-carrier-protein] synthase 2	-43.2227	7.66321	14.9877	Piscirickettsia salmonis LF-89 = ATCC VR-1361.	Bacteria; Proteobacteria; Gammaproteobacteria; Thiotrichales;Piscirickettsiaceae; Piscirickettsia.	1227812	PSLF89_3066	chromosome	beta-ketoacyl-[acyl-carrier-protein] synthase II	beta-ketoacyl-acyl-carrier-protein synthase II [Piscirickettsia salmonis]_x0001_gb|ERL62439.1| beta-ketoacyl-acyl-carrier-protein synthase II [Piscirickettsia salmonis LF-89 = ATCC VR-1361]	IQ	(gi:333990289) kasB (JDM601_1649) - 3-oxoacyl-(acyl carrier protein) synthase II [Mycobacterium sp. str. JDM601]	Lipid and fatty acid metabolism
U4TGC8	rpmF	50S ribosomal protein L32	-14.6456	8.12899	36.8421	Piscirickettsia salmonis LF-89 = ATCC VR-1361.	Bacteria; Proteobacteria; Gammaproteobacteria; Thiotrichales;Piscirickettsiaceae; Piscirickettsia.	1227812	PSLF89_3072	chromosome	50S ribosomal protein L32	50S ribosomal protein L32 [Piscirickettsia salmonis]_x0001_gb|ERL62440.1| ribosomal protein L32 [Piscirickettsia salmonis LF-89 = ATCC VR-1361]_x0001_gb|KGP93880.1| 50S ribosomal protein L32 [Piscirickettsia salmonis]	J
A0A0H4R3W4	phbC	PhbC	-22.9155	7.76997	11.4943	Piscirickettsia salmonis LF-89 = ATCC VR-1361.	Bacteria; Proteobacteria; Gammaproteobacteria; Thiotrichales;Piscirickettsiaceae; Piscirickettsia.	1227812	PSLF89_3075	chromosome	poly(3-hydroxyalkanoate) synthetase	hypothetical protein [Piscirickettsia salmonis]	I
A0A0J1J8L0	ORFNames=AB894_14165, PSLF89_3082	GTP cyclohydrolase 1 type 2 homolog	-20.0027	7.61842	15.873	Piscirickettsia salmonis LF-89 = ATCC VR-1361.	Bacteria; Proteobacteria; Gammaproteobacteria; Thiotrichales;Piscirickettsiaceae; Piscirickettsia.	1227812	PSLF89_3082	chromosome	metal-binding protein	metal-binding protein, partial [Piscirickettsia salmonis]	H
A0A0J1LYU1	AB894_14145	Toluene tolerance protein	-28.8293	7.63386	19.3548	Piscirickettsia salmonis LF-89 = ATCC VR-1361.	Bacteria; Proteobacteria; Gammaproteobacteria; Thiotrichales;Piscirickettsiaceae; Piscirickettsia.	1227812	PSLF89_3086	chromosome	toluene tolerance protein	hypothetical protein [Piscirickettsia salmonis]_x0001_gb|KGP93635.1| toluene tolerance, Ttg2 family protein [Piscirickettsia salmonis]	I
A0A0J1J8B0	yhbH	Ribosomal protein L11 methyltransferase	-25.0004	8.0727	30.0971	Piscirickettsia salmonis LF-89 = ATCC VR-1361.	Bacteria; Proteobacteria; Gammaproteobacteria; Thiotrichales;Piscirickettsiaceae; Piscirickettsia.	1227812	PSLF89_3095	chromosome	ribosomal protein L11 methyltransferase	hypothetical protein [Piscirickettsia salmonis]_x0001_gb|KGP94142.1| ribosomal subunit interface protein [Piscirickettsia salmonis]	J
U4TP77	ORFNames=AB894_14065, K661_00287	Uncharacterized protein	-147.81	8.67064	35.0877	Piscirickettsia salmonis LF-89 = ATCC VR-1361.	Bacteria; Proteobacteria; Gammaproteobacteria; Thiotrichales;Piscirickettsiaceae; Piscirickettsia.	1227812	PSLF89_3102	chromosome	hypothetical protein	hypothetical protein [Piscirickettsia salmonis]_x0001_gb|ERL63337.1| hypothetical protein K661_00287 [Piscirickettsia salmonis LF-89= ATCC VR-1361]_x0001_gb|KGP94800.1| hypothetical protein KU39_02927 [Piscirickettsia salmonis]_x0001_gb|KGP96816.1| hypothetical protein KW89_02485 [Piscirickettsia salmonis]	No orthologs found
A0A0J1J8J9	ORFNames=AB894_14055, PSLF89_3104	Type VI secretion protein	-15.0224	6.88964	2.31317	Piscirickettsia salmonis LF-89 = ATCC VR-1361.	Bacteria; Proteobacteria; Gammaproteobacteria; Thiotrichales;Piscirickettsiaceae; Piscirickettsia.	1227812	PSLF89_3104	chromosome	hypothetical protein	hypothetical protein [Piscirickettsia salmonis]_x0001_gb|KGP94798.1| type VI secretion system protein ImpG [Piscirickettsia salmonis]	No orthologs found		Secretion system
A0A0J1J8D4	ORFNames=AB894_14045, PSLF89_3106	Type VI secretion protein	-115.357	8.72478	29.7959	Piscirickettsia salmonis LF-89 = ATCC VR-1361.	Bacteria; Proteobacteria; Gammaproteobacteria; Thiotrichales;Piscirickettsiaceae; Piscirickettsia.	1227812	PSLF89_3106	chromosome	type VI secretion protein	type VI secretion protein [Piscirickettsia salmonis]	U	(gi:229593385) PFLU6020 - hypothetical protein [Pseudomonas fluorescens str. SBW25]	Secretion system
U4TJ07	K661_00292	Uncharacterized protein	-14.5195	7.61777	10.4938	Piscirickettsia salmonis LF-89 = ATCC VR-1361.	Bacteria; Proteobacteria; Gammaproteobacteria; Thiotrichales;Piscirickettsiaceae; Piscirickettsia.	1227812	PSLF89_3107	chromosome	type VI secretion protein	type VI secretion protein [Piscirickettsia salmonis]_x0001_gb|KGP94795.1| type VI secretion protein [Piscirickettsia salmonis]	U		Secretion system
A0A0H4R693	PSLF89_3112	Uncharacterized protein	-15.6343	6.90155	5.10441	Piscirickettsia salmonis LF-89 = ATCC VR-1361.	Bacteria; Proteobacteria; Gammaproteobacteria; Thiotrichales;Piscirickettsiaceae; Piscirickettsia.	1227812	PSLF89_3112	chromosome	hypothetical protein	hypothetical protein [Piscirickettsia salmonis]_x0001_gb|ERL63323.1| hypothetical protein K661_00297 [Piscirickettsia salmonis LF-89= ATCC VR-1361]	S
A0A0H4R6A6	surA	Chaperone SurA	-12.4557	6.98893	5.21327	Piscirickettsia salmonis LF-89 = ATCC VR-1361.	Bacteria; Proteobacteria; Gammaproteobacteria; Thiotrichales;Piscirickettsiaceae; Piscirickettsia.	1227812	PSLF89_3129	chromosome	surA N-terminal domain protein	hypothetical protein [Piscirickettsia salmonis]	O
U4TME3	K661_00871	TrfA family protein	-14.4825	7.86553	7.77778	Piscirickettsia salmonis LF-89 = ATCC VR-1361.	Bacteria; Proteobacteria; Gammaproteobacteria; Thiotrichales;Piscirickettsiaceae; Piscirickettsia.	1227812	PSLF89_3161	chromosome	trfA family protein	trfA family protein [Piscirickettsia salmonis]	No orthologs found
A0A0J1JDN0	AB894_04505	Lipoprotein	-7.16136	6.79587	7.01107	Piscirickettsia salmonis LF-89 = ATCC VR-1361.	Bacteria; Proteobacteria; Gammaproteobacteria; Thiotrichales;Piscirickettsiaceae; Piscirickettsia.	1227812	PSLF89_3162	chromosome	D-methionine-binding lipoprotein metQ	D-methionine-binding lipoprotein metQ [Piscirickettsia salmonis]	P
A0A0H4R3G4	PSLF89_3165	Exodeoxyribonuclease I	-4.24123	7.32743	3.5865	Piscirickettsia salmonis LF-89 = ATCC VR-1361.	Bacteria; Proteobacteria; Gammaproteobacteria; Thiotrichales;Piscirickettsiaceae; Piscirickettsia.	1227812	PSLF89_3165	chromosome	exonuclease	exonuclease [Piscirickettsia salmonis]	L
A0A0J1JDM9	AB894_04475	Metallopeptidase M24 family protein	-36.5414	7.62559	10.0503	Piscirickettsia salmonis LF-89 = ATCC VR-1361.	Bacteria; Proteobacteria; Gammaproteobacteria; Thiotrichales;Piscirickettsiaceae; Piscirickettsia.	1227812	PSLF89_3167	chromosome	metallopeptidase M24 family protein	hypothetical protein [Piscirickettsia salmonis]_x0001_gb|KGP97415.1| metallopeptidase M24 family protein [Piscirickettsia salmonis]	E
A0A0J1JDI8	purD	Phosphoribosylamine--glycine ligase	-16.3579	7.23377	3.97196	Piscirickettsia salmonis LF-89 = ATCC VR-1361.	Bacteria; Proteobacteria; Gammaproteobacteria; Thiotrichales;Piscirickettsiaceae; Piscirickettsia.	1227812	PSLF89_3176	chromosome	phosphoribosylamine--glycine ligase	hypothetical protein [Piscirickettsia salmonis]_x0001_gb|KGP97407.1| phosphoribosylamine--glycine ligase [Piscirickettsia salmonis]	F
A0A0J1JDM3	purH	Bifunctional purine biosynthesis protein PurH	-28.0398	7.76316	11.0895	Piscirickettsia salmonis LF-89 = ATCC VR-1361.	Bacteria; Proteobacteria; Gammaproteobacteria; Thiotrichales;Piscirickettsiaceae; Piscirickettsia.	1227812	PSLF89_3177	chromosome	bifunctional phosphoribosylaminoimidazolecarboxamide formyltransferase/inosine monophosphate cyclohydrolase	IMP cyclohydrolase [Piscirickettsia salmonis]_x0001_gb|KGP97406.1| IMP cyclohydrolase [Piscirickettsia salmonis]	F
U4TM40	groS	10 kDa chaperonin	-110.208	8.80161	65.625	Piscirickettsia salmonis LF-89 = ATCC VR-1361.	Bacteria; Proteobacteria; Gammaproteobacteria; Thiotrichales;Piscirickettsiaceae; Piscirickettsia.	1227812	PSLF89_3184	chromosome	molecular chaperone GroES	10 kDa chaperonin [Piscirickettsia salmonis]_x0001_gb|ERL62983.1| 10 kDa chaperonin [Piscirickettsia salmonis LF-89 = ATCC VR-1361]_x0001_gb|KGP97399.1| 10 kDa chaperonin [Piscirickettsia salmonis]_x0001_gb|KGP99875.1| 10 kDa chaperonin [Piscirickettsia salmonis]	O
A0A0J1JDI6	groEL	60 kDa chaperonin	-454.319	9.1396	33.6347	Piscirickettsia salmonis LF-89 = ATCC VR-1361.	Bacteria; Proteobacteria; Gammaproteobacteria; Thiotrichales;Piscirickettsiaceae; Piscirickettsia.	1227812	PSLF89_3185	chromosome	molecular chaperone GroEL	molecular chaperone GroEL [Piscirickettsia salmonis]_x0001_gb|KGP97398.1| molecular chaperone GroEL [Piscirickettsia salmonis]	O	(gi:52840925) htpB (lpg0688) - Hsp60, 60K heat shock protein HtpB [Legionella pneumophila str. Philadelphia 1]	Adhesins, adherence and adhesion-related proteins
A0A0J1JDQ4	AB894_04380	Dihydrolipoyl dehydrogenase	-27.4926	7.78665	10.3594	Piscirickettsia salmonis LF-89 = ATCC VR-1361.	Bacteria; Proteobacteria; Gammaproteobacteria; Thiotrichales;Piscirickettsiaceae; Piscirickettsia.	1227812	PSLF89_3188	chromosome	dihydrolipoamide dehydrogenase	dihydrolipoamide dehydrogenase [Piscirickettsia salmonis]_x0001_gb|KGP97393.1| dihydrolipoamide dehydrogenase [Piscirickettsia salmonis]	C
A0A0H4R459	aceE	Pyruvate dehydrogenase E1 component	-109.579	8.50965	14.3982	Piscirickettsia salmonis LF-89 = ATCC VR-1361.	Bacteria; Proteobacteria; Gammaproteobacteria; Thiotrichales;Piscirickettsiaceae; Piscirickettsia.	1227812	PSLF89_3190	chromosome	pyruvate dehydrogenase	hypothetical protein [Piscirickettsia salmonis]_x0001_gb|KGP97391.1| pyruvate dehydrogenase [Piscirickettsia salmonis]	C
A0A0J1JDH7	hflB	ATP-dependent zinc metalloprotease FtsH	-14.7212	7.30135	3.46908	Piscirickettsia salmonis LF-89 = ATCC VR-1361.	Bacteria; Proteobacteria; Gammaproteobacteria; Thiotrichales;Piscirickettsiaceae; Piscirickettsia.	1227812	PSLF89_3192	chromosome	ATP-dependent metalloprotease	ATP-dependent metalloprotease [Piscirickettsia salmonis]	O
A0A0J1JDI2	ORFNames=AB894_04345, PSLF89_3195	CRS1 / YhbY domain protein	-11.0419	6.80644	8.84354	Piscirickettsia salmonis LF-89 = ATCC VR-1361.	Bacteria; Proteobacteria; Gammaproteobacteria; Thiotrichales;Piscirickettsiaceae; Piscirickettsia.	1227812	PSLF89_3195	chromosome	CRS1 / YhbY domain protein	hypothetical protein [Piscirickettsia salmonis]_x0001_gb|KGP97386.1| CRS1 / YhbY domain protein [Piscirickettsia salmonis]	J
A0A0J1JCV2	dnaK	Chaperone protein DnaK	-181.47	8.25479	16.6149	Piscirickettsia salmonis LF-89 = ATCC VR-1361.	Bacteria; Proteobacteria; Gammaproteobacteria; Thiotrichales;Piscirickettsiaceae; Piscirickettsia.	1227812	PSLF89_321	chromosome	molecular chaperone DnaK	chaperone protein DnaK [Piscirickettsia salmonis]_x0001_gb|KGP98484.1| molecular chaperone DnaK [Piscirickettsia salmonis]	O
A0A0J1JEI4	ORFNames=AB894_02820, PSLF89_3226	ProQ/FINO family protein	-27.9414	7.52911	26.4516	Piscirickettsia salmonis LF-89 = ATCC VR-1361.	Bacteria; Proteobacteria; Gammaproteobacteria; Thiotrichales;Piscirickettsiaceae; Piscirickettsia.	1227812	PSLF89_3226	chromosome	proQ/FINO family protein	hypothetical protein [Piscirickettsia salmonis]_x0001_gb|KGP95556.1| proQ/FINO family protein [Piscirickettsia salmonis]	T
A0A0J1JEG5	secB	Protein-export protein SecB	-32.6927	8.43443	29.8781	Piscirickettsia salmonis LF-89 = ATCC VR-1361.	Bacteria; Proteobacteria; Gammaproteobacteria; Thiotrichales;Piscirickettsiaceae; Piscirickettsia.	1227812	PSLF89_3235	chromosome	preprotein translocase subunit SecB	hypothetical protein [Piscirickettsia salmonis]_x0001_gb|KGP95566.1| protein-export chaperone SecB [Piscirickettsia salmonis]	U
U4TLX5	gpsA	Glycerol-3-phosphate dehydrogenase [NAD(P)+]	-43.9968	7.82257	14.8036	Piscirickettsia salmonis LF-89 = ATCC VR-1361.	Bacteria; Proteobacteria; Gammaproteobacteria; Thiotrichales;Piscirickettsiaceae; Piscirickettsia.	1227812	PSLF89_3236	chromosome	glycerol-3-phosphate dehydrogenase	hypothetical protein [Piscirickettsia salmonis]_x0001_gb|KGP95567.1| NAD-dependent glycerol-3-phosphate dehydrogenase family protein[Piscirickettsia salmonis]	C
A0A0J1JBJ2	ORFNames=AB894_08115, PSLF89_3244	Uncharacterized protein	-24.6844	7.83815	22.4	Piscirickettsia salmonis LF-89 = ATCC VR-1361.	Bacteria; Proteobacteria; Gammaproteobacteria; Thiotrichales;Piscirickettsiaceae; Piscirickettsia.	1227812	PSLF89_3244	chromosome	hypothetical protein	hypothetical protein [Piscirickettsia salmonis]_x0001_gb|KGP98132.1| periplasmic ligand-binding sensor protein [Piscirickettsia salmonis]	S
A0A0J1M1U4	AB894_08135	MFP transporter	-13.0728	7.07969	5.44959	Piscirickettsia salmonis LF-89 = ATCC VR-1361.	Bacteria; Proteobacteria; Gammaproteobacteria; Thiotrichales;Piscirickettsiaceae; Piscirickettsia.	1227812	PSLF89_3249	chromosome	MFP transporter	hypothetical protein [Piscirickettsia salmonis]_x0001_gb|KGP98135.1| efflux transporter, RND family, MFP subunit [Piscirickettsia salmonis]	MV
A0A0J1JBM8	mexI	Acriflavine resistance protein B	-53.2462	8.16443	6.46425	Piscirickettsia salmonis LF-89 = ATCC VR-1361.	Bacteria; Proteobacteria; Gammaproteobacteria; Thiotrichales;Piscirickettsiaceae; Piscirickettsia.	1227812	PSLF89_3250	chromosome	acriflavine resistance protein B	hypothetical protein [Piscirickettsia salmonis]_x0001_gb|KGP98136.1| MMPL family protein [Piscirickettsia salmonis]	V
A0A0H4RL13	PSLF89_3252	Uncharacterized protein	-128.767	8.97628	33.0296	Piscirickettsia salmonis LF-89 = ATCC VR-1361.	Bacteria; Proteobacteria; Gammaproteobacteria; Thiotrichales;Piscirickettsiaceae; Piscirickettsia.	1227812	PSLF89_3252	chromosome	hypothetical protein	hypothetical protein [Piscirickettsia salmonis]_x0001_gb|KGP98138.1| hypothetical protein KU39_00375 [Piscirickettsia salmonis]	No orthologs found
A0A0J1JBN3	hemY	HemY	-12.2663	6.65732	3.08483	Piscirickettsia salmonis LF-89 = ATCC VR-1361.	Bacteria; Proteobacteria; Gammaproteobacteria; Thiotrichales;Piscirickettsiaceae; Piscirickettsia.	1227812	PSLF89_3266	chromosome	hypothetical protein	hypothetical protein [Piscirickettsia salmonis]_x0001_gb|KGP98155.1| tetratricopeptide repeat family protein [Piscirickettsia salmonis]	No orthologs found
U4TIP3	K661_00359	Two-component transcriptional regulatory family protein	-90.2324	8.28653	26.2712	Piscirickettsia salmonis LF-89 = ATCC VR-1361.	Bacteria; Proteobacteria; Gammaproteobacteria; Thiotrichales;Piscirickettsiaceae; Piscirickettsia.	1227812	PSLF89_3273	chromosome	transcriptional regulator	hypothetical protein [Piscirickettsia salmonis]_x0001_gb|KGP98162.1| two-component transcriptional regulatory family protein [Piscirickettsia salmonis]	TK	(gi:387874359) mprA (W7S_04765) - two component response transcriptional regulatory protein MprA [Mycobacterium intracellulare str. MOTT36Y]	Regulation
A0A0J1JBL0	ORFNames=AB894_08270, AB894_08280	2-alkenal reductase	-5.12809	7.84818	5.46448	Piscirickettsia salmonis LF-89 = ATCC VR-1361.	Bacteria; Proteobacteria; Gammaproteobacteria; Thiotrichales;Piscirickettsiaceae; Piscirickettsia.	1227812	PSLF89_3274	chromosome	2-alkenal reductase	hypothetical protein [Piscirickettsia salmonis]_x0001_gb|KGP98163.1| trypsin family protein [Piscirickettsia salmonis]	O	(gi:170720094) algW (PputW619_0908) - 2-alkenal reductase [Pseudomonas putida str. W619]	Antiphagocytosis, capsule
U4TMX2	K661_00366	Mannose-1-phosphate guanylyltransferase/mannose-6-phosphate isomerase	-4.08253	8.1224	10.9677	Piscirickettsia salmonis LF-89 = ATCC VR-1361.	Bacteria; Proteobacteria; Gammaproteobacteria; Thiotrichales;Piscirickettsiaceae; Piscirickettsia.	1227812	PSLF89_3281	chromosome	mannose-1-phosphate guanyltransferase	hypothetical protein [Piscirickettsia salmonis]_x0001_gb|KGP98170.1| mannose-1-phosphate guanylyltransferase/mannose-6-phosphate isomerase[Piscirickettsia salmonis]	M	(gi:332161122) YE105_C1500 - Mannose-1-phosphate guanylytransferase, ManC protein [Yersinia enterocolitica str. 105.5R(r) (subsp. palearctica)]	Endotoxin
A0A0J1JFU5	sfcA	Malate dehydrogenase	-13.5563	7.2832	2.08696	Piscirickettsia salmonis LF-89 = ATCC VR-1361.	Bacteria; Proteobacteria; Gammaproteobacteria; Thiotrichales;Piscirickettsiaceae; Piscirickettsia.	1227812	PSLF89_3304	chromosome	NAD-dependent malic enzyme	hypothetical protein [Piscirickettsia salmonis]_x0001_gb|KGP96460.1| putative NAD-dependent malic enzyme 2 [Piscirickettsia salmonis]	C
U4TBL7	hemE	Uroporphyrinogen decarboxylase	-8.84549	6.90618	3.97727	Piscirickettsia salmonis LF-89 = ATCC VR-1361.	Bacteria; Proteobacteria; Gammaproteobacteria; Thiotrichales;Piscirickettsiaceae; Piscirickettsia.	1227812	PSLF89_3305	chromosome	uroporphyrinogen decarboxylase	hypothetical protein [Piscirickettsia salmonis]_x0001_gb|KGP96461.1| uroporphyrinogen decarboxylase [Piscirickettsia salmonis]_x0001_gb|KGP99133.1| uroporphyrinogen decarboxylase [Piscirickettsia salmonis]	H	(gi:170718716) hemE (HSM_0564) - uroporphyrinogen decarboxylase [Haemophilus somnus str. 2336]	Metal uptake and heme acquisition
U4TEA7	aroE	Shikimate dehydrogenase (NADP(+))	-11.1757	6.89548	7.5	Piscirickettsia salmonis LF-89 = ATCC VR-1361.	Bacteria; Proteobacteria; Gammaproteobacteria; Thiotrichales;Piscirickettsiaceae; Piscirickettsia.	1227812	PSLF89_3317	chromosome	shikimate dehydrogenase	hypothetical protein [Piscirickettsia salmonis]_x0001_gb|KGP96473.1| shikimate dehydrogenase [Piscirickettsia salmonis]	E
A0A0H4REM3	pilC	PilC	-4.55817	8.07502	9.90099	Piscirickettsia salmonis LF-89 = ATCC VR-1361.	Bacteria; Proteobacteria; Gammaproteobacteria; Thiotrichales;Piscirickettsiaceae; Piscirickettsia.	1227812	PSLF89_332	chromosome	hypothetical protein	type II secretion system (T2SS), F family protein [Piscirickettsia salmonis]	NUW
U4TIN2	ORFNames=AB894_01800, K661_02128	Cytochrome C oxidase subunit IV	-9.21467	5.96108	9.73451	Piscirickettsia salmonis LF-89 = ATCC VR-1361.	Bacteria; Proteobacteria; Gammaproteobacteria; Thiotrichales;Piscirickettsiaceae; Piscirickettsia.	1227812	PSLF89_3352	chromosome	cytochrome C oxidase subunit IV	prokaryotic Cytochrome C oxidase subunit IV family protein [Piscirickettsia salmonis]_x0001_gb|ERL61532.1| prokaryotic Cytochrome C oxidase subunit IV family protein [Piscirickettsia salmonis LF-89 = ATCC VR-1361]_x0001_gb|KGP94613.1| prokaryotic Cytochrome C oxidase subunit IV family protein [Piscirickettsia salmonis]_x0001_gb|KGP96156.1| prokaryotic Cytochrome C oxidase subunit IV family protei…	C
A0A0H4R307	cyoB	CyoB	-12.2063	7.73643	1.7134	Piscirickettsia salmonis LF-89 = ATCC VR-1361.	Bacteria; Proteobacteria; Gammaproteobacteria; Thiotrichales;Piscirickettsiaceae; Piscirickettsia.	1227812	PSLF89_3354	chromosome	cytochrome ubiquinol oxidase subunit I	hypothetical protein [Piscirickettsia salmonis]_x0001_gb|KGP94611.1| cytochrome o ubiquinol oxidase subunit I [Piscirickettsia salmonis]	C
A0A0H4RLB8	cyoA	CyoA	-26.1253	7.79361	12.1406	Piscirickettsia salmonis LF-89 = ATCC VR-1361.	Bacteria; Proteobacteria; Gammaproteobacteria; Thiotrichales;Piscirickettsiaceae; Piscirickettsia.	1227812	PSLF89_3355	chromosome	cytochrome ubiquinol oxidase subunit II	hypothetical protein [Piscirickettsia salmonis]_x0001_gb|KGP94610.1| ubiquinol oxidase, subunit II [Piscirickettsia salmonis]	C
A0A0J1J9N5	ORFNames=AB894_11840, PSLF89_3367	Uncharacterized protein	-27.6837	7.00934	13.3333	Piscirickettsia salmonis LF-89 = ATCC VR-1361.	Bacteria; Proteobacteria; Gammaproteobacteria; Thiotrichales;Piscirickettsiaceae; Piscirickettsia.	1227812	PSLF89_3367	chromosome	hypothetical protein	hypothetical protein [Piscirickettsia salmonis]_x0001_gb|KGP95588.1| membrane protein [Piscirickettsia salmonis]	No orthologs found
A0A0H4R4M0	atpC	ATP synthase epsilon chain	-14.4779	7.83422	17.6056	Piscirickettsia salmonis LF-89 = ATCC VR-1361.	Bacteria; Proteobacteria; Gammaproteobacteria; Thiotrichales;Piscirickettsiaceae; Piscirickettsia.	1227812	PSLF89_3379	chromosome	ATP synthase F0F1 subunit epsilon	hypothetical protein [Piscirickettsia salmonis]_x0001_gb|KGP98219.1| ATP synthase F1, epsilon subunit [Piscirickettsia salmonis]	C
A0A0H4REN0	nusG	Transcription termination/antitermination protein NusG	-12.655	7.23528	13.6364	Piscirickettsia salmonis LF-89 = ATCC VR-1361.	Bacteria; Proteobacteria; Gammaproteobacteria; Thiotrichales;Piscirickettsiaceae; Piscirickettsia.	1227812	PSLF89_338	chromosome	antitermination protein NusG	transcription termination/antitermination factor NusG [Piscirickettsia salmonis]_x0001_gb|KGP96687.1| transcription antitermination protein NusG [Piscirickettsia salmonis]	K
U4TPQ5	atpD	ATP synthase subunit beta	-178.521	8.66549	36.0691	Piscirickettsia salmonis LF-89 = ATCC VR-1361.	Bacteria; Proteobacteria; Gammaproteobacteria; Thiotrichales;Piscirickettsiaceae; Piscirickettsia.	1227812	PSLF89_3380	chromosome	ATP synthase subunit beta	ATP synthase F1, beta subunit [Piscirickettsia salmonis]_x0001_gb|ERL63527.1| ATP synthase F1, beta subunit [Piscirickettsia salmonis LF-89= ATCC VR-1361]_x0001_gb|KGP98220.1| ATP synthase F1, beta subunit [Piscirickettsia salmonis]_x0001_gb|KGQ00303.1| ATP synthase F1, beta subunit [Piscirickettsia salmonis]	C	(gi:32266064) fliI (HH0565) - flagellum-specific ATP synthase [Helicobacter hepaticus str. ATCC 51449]	Motility and export apparatus
A0A0H4R6V7	atpG	ATP synthase gamma chain	-22.9267	7.5563	10.7692	Piscirickettsia salmonis LF-89 = ATCC VR-1361.	Bacteria; Proteobacteria; Gammaproteobacteria; Thiotrichales;Piscirickettsiaceae; Piscirickettsia.	1227812	PSLF89_3381	chromosome	ATP F0F1 synthase subunit gamma	ATP F0F1 synthase subunit gamma [Piscirickettsia salmonis]_x0001_gb|KGP98221.1| ATP F0F1 synthase subunit gamma [Piscirickettsia salmonis]	C
A0A0J1M1I7	atpA	ATP synthase subunit alpha	-128.014	8.71999	28.0702	Piscirickettsia salmonis LF-89 = ATCC VR-1361.	Bacteria; Proteobacteria; Gammaproteobacteria; Thiotrichales;Piscirickettsiaceae; Piscirickettsia.	1227812	PSLF89_3382	chromosome	ATP synthase subunit alpha	F0F1 ATP synthase subunit alpha [Piscirickettsia salmonis]_x0001_gb|KGP98222.1| F0F1 ATP synthase subunit alpha [Piscirickettsia salmonis]	C	(gi:218892348) pscN (PLES_36301) - type III secretion system ATPase [Pseudomonas aeruginosa str. LESB58]	Secretion system
U4TNQ3	atpF	ATP synthase F0, B subunit	-17.2757	7.86504	11.0236	Piscirickettsia salmonis LF-89 = ATCC VR-1361.	Bacteria; Proteobacteria; Gammaproteobacteria; Thiotrichales;Piscirickettsiaceae; Piscirickettsia.	1227812	PSLF89_3384	chromosome	ATP synthase subunit B	hypothetical protein [Piscirickettsia salmonis]_x0001_gb|KGP98224.1| ATP synthase F0, B subunit [Piscirickettsia salmonis]_x0001_gb|KGQ00307.1| ATP synthase F0, B subunit [Piscirickettsia salmonis]	C
U4TFI4	atpE	ATP synthase subunit c	-15.4559	8.11318	14.9254	Piscirickettsia salmonis LF-89 = ATCC VR-1361.	Bacteria; Proteobacteria; Gammaproteobacteria; Thiotrichales;Piscirickettsiaceae; Piscirickettsia.	1227812	PSLF89_3385	chromosome	ATP synthase F0 subunit C	ATP synthase F0, C subunit [Piscirickettsia salmonis]_x0001_gb|ERL63516.1| ATP synthase F0, C subunit [Piscirickettsia salmonis LF-89 =ATCC VR-1361]_x0001_gb|KGP98225.1| ATP synthase F0, C subunit [Piscirickettsia salmonis]_x0001_gb|KGQ00308.1| ATP synthase F0, C subunit [Piscirickettsia salmonis]	C
U4TPR8	K661_00087	ParB/RepB/Spo0J family partition domain protein	-13.1554	6.56222	6.06061	Piscirickettsia salmonis LF-89 = ATCC VR-1361.	Bacteria; Proteobacteria; Gammaproteobacteria; Thiotrichales;Piscirickettsiaceae; Piscirickettsia.	1227812	PSLF89_3387	chromosome	chromosome partitioning protein ParB	chromosome partitioning protein ParB [Piscirickettsia salmonis]_x0001_gb|KGP98228.1| chromosome partitioning protein ParB [Piscirickettsia salmonis]	D
A0A0J1JBB4	yidC	Membrane protein insertase YidC	-31.2656	7.39335	11.8375	Piscirickettsia salmonis LF-89 = ATCC VR-1361.	Bacteria; Proteobacteria; Gammaproteobacteria; Thiotrichales;Piscirickettsiaceae; Piscirickettsia.	1227812	PSLF89_3392	chromosome	insertase	hypothetical protein [Piscirickettsia salmonis]_x0001_gb|KGP98233.1| membrane protein insertase, YidC/Oxa1 family protein [Piscirickettsia salmonis]	M
A0A0J1JEL0	rplA	50S ribosomal protein L1	-72.3158	8.06209	32.7586	Piscirickettsia salmonis LF-89 = ATCC VR-1361.	Bacteria; Proteobacteria; Gammaproteobacteria; Thiotrichales;Piscirickettsiaceae; Piscirickettsia.	1227812	PSLF89_340	chromosome	50S ribosomal protein L1	50S ribosomal protein L1 [Piscirickettsia salmonis]_x0001_gb|KGP96685.1| 50S ribosomal protein L1 [Piscirickettsia salmonis]_x0001_gb|KGP99377.1| 50S ribosomal protein L1 [Piscirickettsia salmonis]	J
A0A0J1JER0	rplJ	50S ribosomal protein L10	-41.0579	8.3827	41.0714	Piscirickettsia salmonis LF-89 = ATCC VR-1361.	Bacteria; Proteobacteria; Gammaproteobacteria; Thiotrichales;Piscirickettsiaceae; Piscirickettsia.	1227812	PSLF89_341	chromosome	50S ribosomal protein L10	50S ribosomal protein L10 [Piscirickettsia salmonis]_x0001_gb|KGP96684.1| 50S ribosomal protein L10 [Piscirickettsia salmonis]	J
U4TI81	rplL	50S ribosomal protein L7/L12	-16.9738	7.25338	22.1311	Piscirickettsia salmonis LF-89 = ATCC VR-1361.	Bacteria; Proteobacteria; Gammaproteobacteria; Thiotrichales;Piscirickettsiaceae; Piscirickettsia.	1227812	PSLF89_342	chromosome	50S ribosomal protein L7/L12	50S ribosomal protein L7/L12 [Piscirickettsia salmonis]_x0001_gb|KGP96683.1| 50S ribosomal protein L7/L12 [Piscirickettsia salmonis]	J
A0A0J1M4U0	rpoB	DNA-directed RNA polymerase subunit beta	-40.8508	7.96168	5.081	Piscirickettsia salmonis LF-89 = ATCC VR-1361.	Bacteria; Proteobacteria; Gammaproteobacteria; Thiotrichales;Piscirickettsiaceae; Piscirickettsia.	1227812	PSLF89_343	chromosome	DNA-directed RNA polymerase subunit beta	DNA-directed RNA polymerase subunit beta [Piscirickettsia salmonis]_x0001_gb|KGP96682.1| DNA-directed RNA polymerase subunit beta [Piscirickettsia salmonis]	K
U4TED7	rpoC	DNA-directed RNA polymerase subunit beta'	-111.549	8.41887	9.70043	Piscirickettsia salmonis LF-89 = ATCC VR-1361.	Bacteria; Proteobacteria; Gammaproteobacteria; Thiotrichales;Piscirickettsiaceae; Piscirickettsia.	1227812	PSLF89_344	chromosome	DNA-directed RNA polymerase subunit beta'	DNA-directed RNA polymerase subunit beta' [Piscirickettsia salmonis]_x0001_gb|KGP96681.1| DNA-directed RNA polymerase subunit beta' [Piscirickettsia salmonis]	K
U4TEC7	rpsG	30S ribosomal protein S7	-14.2207	7.81089	7.64331	Piscirickettsia salmonis LF-89 = ATCC VR-1361.	Bacteria; Proteobacteria; Gammaproteobacteria; Thiotrichales;Piscirickettsiaceae; Piscirickettsia.	1227812	PSLF89_346	chromosome	30S ribosomal protein S7	30S ribosomal protein S7 [Piscirickettsia salmonis]_x0001_gb|ERL63096.1| ribosomal protein S7 [Piscirickettsia salmonis LF-89 = ATCC VR-1361]_x0001_gb|KGP96679.1| 30S ribosomal protein S7 [Piscirickettsia salmonis]_x0001_gb|KGP99371.1| 30S ribosomal protein S7 [Piscirickettsia salmonis]	J
A0A0J1JEP2	fusA	Elongation factor G	-95.8108	8.49829	15.2205	Piscirickettsia salmonis LF-89 = ATCC VR-1361.	Bacteria; Proteobacteria; Gammaproteobacteria; Thiotrichales;Piscirickettsiaceae; Piscirickettsia.	1227812	PSLF89_347	chromosome	elongation factor G	elongation factor G [Piscirickettsia salmonis]_x0001_gb|KGP96678.1| elongation factor G [Piscirickettsia salmonis]	J	(gi:71894677) tuf (MS53_0667) - Elongation factor Tu [Mycoplasma synoviae str. 53]	Adhesins, adherence and adhesion-related proteins
U4TMI7	tuf	Elongation factor Tu	-212.483	9.13227	38.6364	Piscirickettsia salmonis LF-89 = ATCC VR-1361.	Bacteria; Proteobacteria; Gammaproteobacteria; Thiotrichales;Piscirickettsiaceae; Piscirickettsia.	1227812	PSLF89_348	chromosome	elongation factor Tu	translation elongation factor Tu [Piscirickettsia salmonis]_x0001_gb|ERL63123.1| translation elongation factor Tu [Piscirickettsia salmonis LF-89= ATCC VR-1361]_x0001_gb|KGP96677.1| translation elongation factor Tu [Piscirickettsia salmonis]_x0001_gb|KGP99369.1| translation elongation factor Tu [Piscirickettsia salmonis]	J	(gi:26553484) tuf (MYPE320) - elongation factor Tu [Mycoplasma penetrans str. HF-2]	Adhesins, adherence and adhesion-related proteins
A0A0J1JEK5	rplC	50S ribosomal protein L3	-7.86107	5.92541	4.71698	Piscirickettsia salmonis LF-89 = ATCC VR-1361.	Bacteria; Proteobacteria; Gammaproteobacteria; Thiotrichales;Piscirickettsiaceae; Piscirickettsia.	1227812	PSLF89_350	chromosome	50S ribosomal protein L3	50S ribosomal protein L3 [Piscirickettsia salmonis]_x0001_gb|KGP96675.1| 50S ribosomal protein L3 [Piscirickettsia salmonis]	J
U4TG06	rplD	50S ribosomal protein L4	-48.8128	7.97414	26.8293	Piscirickettsia salmonis LF-89 = ATCC VR-1361.	Bacteria; Proteobacteria; Gammaproteobacteria; Thiotrichales;Piscirickettsiaceae; Piscirickettsia.	1227812	PSLF89_351	chromosome	50S ribosomal protein L4	50S ribosomal protein L4 [Piscirickettsia salmonis]_x0001_gb|ERL63099.1| 50S ribosomal protein L4 [Piscirickettsia salmonis LF-89 = ATCC VR-1361]_x0001_gb|KGP96674.1| 50S ribosomal protein L4 [Piscirickettsia salmonis]_x0001_gb|KGP99366.1| 50S ribosomal protein L4 [Piscirickettsia salmonis]	J
A0A0J1M4S8	rplB	50S ribosomal protein L2	-23.5338	7.3725	8.0292	Piscirickettsia salmonis LF-89 = ATCC VR-1361.	Bacteria; Proteobacteria; Gammaproteobacteria; Thiotrichales;Piscirickettsiaceae; Piscirickettsia.	1227812	PSLF89_353	chromosome	50S ribosomal protein L2	50S ribosomal protein L2 [Piscirickettsia salmonis]_x0001_gb|KGP96672.1| 50S ribosomal protein L2 [Piscirickettsia salmonis]	J
A0A0J1JEQ2	rpsC	30S ribosomal protein S3	-72.16	8.55323	20.082	Piscirickettsia salmonis LF-89 = ATCC VR-1361.	Bacteria; Proteobacteria; Gammaproteobacteria; Thiotrichales;Piscirickettsiaceae; Piscirickettsia.	1227812	PSLF89_355	chromosome	30S ribosomal protein S3	30S ribosomal protein S3 [Piscirickettsia salmonis]_x0001_gb|KGP96669.1| 30S ribosomal protein S3 [Piscirickettsia salmonis]	J
A0A0H4QZZ9	rplP	50S ribosomal protein L16	-20.9574	8.06775	11.3821	Piscirickettsia salmonis LF-89 = ATCC VR-1361.	Bacteria; Proteobacteria; Gammaproteobacteria; Thiotrichales;Piscirickettsiaceae; Piscirickettsia.	1227812	PSLF89_356	chromosome	50S ribosomal protein L16	50S ribosomal protein L16 [Piscirickettsia salmonis]_x0001_gb|KGP96668.1| 50S ribosomal protein L16 [Piscirickettsia salmonis]	J
U4TG20	rpmC	50S ribosomal protein L29	-36.191	8.07277	43.9394	Piscirickettsia salmonis LF-89 = ATCC VR-1361.	Bacteria; Proteobacteria; Gammaproteobacteria; Thiotrichales;Piscirickettsiaceae; Piscirickettsia.	1227812	PSLF89_357	chromosome	50S ribosomal protein L29	50S ribosomal protein L29 [Piscirickettsia salmonis]_x0001_gb|ERL63114.1| ribosomal protein L29 [Piscirickettsia salmonis LF-89 = ATCC VR-1361]_x0001_gb|KGP96667.1| 50S ribosomal protein L29 [Piscirickettsia salmonis]_x0001_gb|KGP99359.1| 50S ribosomal protein L29 [Piscirickettsia salmonis]	J
A0A0J1JEJ9	rplN	50S ribosomal protein L14	-32.0441	8.03081	15.5738	Piscirickettsia salmonis LF-89 = ATCC VR-1361.	Bacteria; Proteobacteria; Gammaproteobacteria; Thiotrichales;Piscirickettsiaceae; Piscirickettsia.	1227812	PSLF89_358	chromosome	50S ribosomal protein L14	50S ribosomal protein L14 [Piscirickettsia salmonis]_x0001_gb|KGP96665.1| 50S ribosomal protein L14 [Piscirickettsia salmonis]_x0001_gb|KGP99357.1| 50S ribosomal protein L14 [Piscirickettsia salmonis]	J
U4TIA5	rplE	50S ribosomal protein L5	-18.9482	7.39851	15	Piscirickettsia salmonis LF-89 = ATCC VR-1361.	Bacteria; Proteobacteria; Gammaproteobacteria; Thiotrichales;Piscirickettsiaceae; Piscirickettsia.	1227812	PSLF89_359	chromosome	50S ribosomal protein L5	50S ribosomal protein L5 [Piscirickettsia salmonis]_x0001_gb|ERL63125.1| 50S ribosomal protein L5 [Piscirickettsia salmonis LF-89 = ATCC VR-1361]_x0001_gb|KGP96663.1| 50S ribosomal protein L5 [Piscirickettsia salmonis]_x0001_gb|KGP99355.1| 50S ribosomal protein L5 [Piscirickettsia salmonis]	J
A0A0H4R003	rpsH	30S ribosomal protein S8	-51.8006	7.73364	20.3125	Piscirickettsia salmonis LF-89 = ATCC VR-1361.	Bacteria; Proteobacteria; Gammaproteobacteria; Thiotrichales;Piscirickettsiaceae; Piscirickettsia.	1227812	PSLF89_361	chromosome	30S ribosomal protein S8	30S ribosomal protein S8 [Piscirickettsia salmonis]_x0001_gb|ERL63127.1| 30S ribosomal protein S8 [Piscirickettsia salmonis LF-89 = ATCC VR-1361]_x0001_gb|KGP96661.1| 30S ribosomal protein S8 [Piscirickettsia salmonis]_x0001_gb|KGP99353.1| 30S ribosomal protein S8 [Piscirickettsia salmonis]	J
U4TIB4	rplF	50S ribosomal protein L6	-62.4254	8.6139	46.8927	Piscirickettsia salmonis LF-89 = ATCC VR-1361.	Bacteria; Proteobacteria; Gammaproteobacteria; Thiotrichales;Piscirickettsiaceae; Piscirickettsia.	1227812	PSLF89_362	chromosome	50S ribosomal protein L6	50S ribosomal protein L6 [Piscirickettsia salmonis]_x0001_gb|KGP96660.1| 50S ribosomal protein L6 [Piscirickettsia salmonis]	J
U4TEF3	rplR	50S ribosomal protein L18	-13.434	7.75442	11.1111	Piscirickettsia salmonis LF-89 = ATCC VR-1361.	Bacteria; Proteobacteria; Gammaproteobacteria; Thiotrichales;Piscirickettsiaceae; Piscirickettsia.	1227812	PSLF89_363	chromosome	50S ribosomal protein L18	50S ribosomal protein L18 [Piscirickettsia salmonis]_x0001_gb|ERL63121.1| ribosomal protein L18 [Piscirickettsia salmonis LF-89 = ATCC VR-1361]_x0001_gb|KGP96659.1| 50S ribosomal protein L18 [Piscirickettsia salmonis]_x0001_gb|KGP99351.1| 50S ribosomal protein L18 [Piscirickettsia salmonis]	J
U4TMJ1	rpsE	30S ribosomal protein S5	-35.8294	8.07151	18.0723	Piscirickettsia salmonis LF-89 = ATCC VR-1361.	Bacteria; Proteobacteria; Gammaproteobacteria; Thiotrichales;Piscirickettsiaceae; Piscirickettsia.	1227812	PSLF89_364	chromosome	30S ribosomal protein S5	30S ribosomal protein S5 [Piscirickettsia salmonis]_x0001_gb|ERL63128.1| ribosomal protein S5 [Piscirickettsia salmonis LF-89 = ATCC VR-1361]_x0001_gb|KGP96658.1| 30S ribosomal protein S5 [Piscirickettsia salmonis]_x0001_gb|KGP99350.1| 30S ribosomal protein S5 [Piscirickettsia salmonis]	J
A0A0J1M4R4	rplO	50S ribosomal protein L15	-4.13918	5.9451	12.5	Piscirickettsia salmonis LF-89 = ATCC VR-1361.	Bacteria; Proteobacteria; Gammaproteobacteria; Thiotrichales;Piscirickettsiaceae; Piscirickettsia.	1227812	PSLF89_365	chromosome	50S ribosomal protein L15	50S ribosomal protein L15 [Piscirickettsia salmonis]_x0001_gb|KGP96657.1| 50S ribosomal protein L15 [Piscirickettsia salmonis]	J
U4TMH5	secY	Protein translocase subunit SecY	-11.276	6.98686	3.63636	Piscirickettsia salmonis LF-89 = ATCC VR-1361.	Bacteria; Proteobacteria; Gammaproteobacteria; Thiotrichales;Piscirickettsiaceae; Piscirickettsia.	1227812	PSLF89_366	chromosome	preprotein translocase subunit SecY	preprotein translocase subunit SecY [Piscirickettsia salmonis]_x0001_gb|ERL63113.1| preprotein translocase, SecY subunit [Piscirickettsia salmonis LF-89 = ATCC VR-1361]_x0001_gb|KGP96656.1| preprotein translocase, SecY subunit [Piscirickettsia salmonis]_x0001_gb|KGP99348.1| preprotein translocase, SecY subunit [Piscirickettsia salmonis]	U
A0A0J1JEI9	rpsM	30S ribosomal protein S13	-17.1508	8.06888	21.1864	Piscirickettsia salmonis LF-89 = ATCC VR-1361.	Bacteria; Proteobacteria; Gammaproteobacteria; Thiotrichales;Piscirickettsiaceae; Piscirickettsia.	1227812	PSLF89_368	chromosome	30S ribosomal protein S13	30S ribosomal protein S13 [Piscirickettsia salmonis]_x0001_gb|KGP96654.1| 30S ribosomal protein S13 [Piscirickettsia salmonis]	J
U4TG03	rpsK	30S ribosomal protein S11	-28.8113	7.71436	40.3101	Piscirickettsia salmonis LF-89 = ATCC VR-1361.	Bacteria; Proteobacteria; Gammaproteobacteria; Thiotrichales;Piscirickettsiaceae; Piscirickettsia.	1227812	PSLF89_369	chromosome	30S ribosomal protein S11	30S ribosomal protein S11 [Piscirickettsia salmonis]_x0001_gb|ERL63094.1| 30S ribosomal protein S11 [Piscirickettsia salmonis LF-89 = ATCC VR-1361]_x0001_gb|KGP96653.1| 30S ribosomal protein S11 [Piscirickettsia salmonis]_x0001_gb|KGP99345.1| 30S ribosomal protein S11 [Piscirickettsia salmonis]	J
A0A0J1JEL1	rpsD	30S ribosomal protein S4	-45.1033	8.30754	15.534	Piscirickettsia salmonis LF-89 = ATCC VR-1361.	Bacteria; Proteobacteria; Gammaproteobacteria; Thiotrichales;Piscirickettsiaceae; Piscirickettsia.	1227812	PSLF89_370	chromosome	30S ribosomal protein S4	30S ribosomal protein S4 [Piscirickettsia salmonis]_x0001_gb|KGP96652.1| 30S ribosomal protein S4 [Piscirickettsia salmonis]	J
U4TG10	rplQ	50S ribosomal protein L17	-15.8716	7.87384	9.84849	Piscirickettsia salmonis LF-89 = ATCC VR-1361.	Bacteria; Proteobacteria; Gammaproteobacteria; Thiotrichales;Piscirickettsiaceae; Piscirickettsia.	1227812	PSLF89_372	chromosome	50S ribosomal protein L17	50S ribosomal protein L17 [Piscirickettsia salmonis]_x0001_gb|KGP96650.1| 50S ribosomal protein L17 [Piscirickettsia salmonis]	J
A0A0H4QZ87	polA	DNA polymerase	-7.53311	6.07673	1.56076	Piscirickettsia salmonis LF-89 = ATCC VR-1361.	Bacteria; Proteobacteria; Gammaproteobacteria; Thiotrichales;Piscirickettsiaceae; Piscirickettsia.	1227812	PSLF89_38	chromosome	DNA polymerase I		L
A0A0J1JF10	AB894_01950	DksA protein	-12.4756	7.40751	15.3846	Piscirickettsia salmonis LF-89 = ATCC VR-1361.	Bacteria; Proteobacteria; Gammaproteobacteria; Thiotrichales;Piscirickettsiaceae; Piscirickettsia.	1227812	PSLF89_391	chromosome	DksA protein	prokaryotic dksA/traR C4-type zinc finger family protein [Piscirickettsia salmonis]_x0001_gb|ERL62267.1| prokaryotic dksA/traR C4-type zinc finger family protein [Piscirickettsia salmonis LF-89 = ATCC VR-1361]_x0001_gb|KGP96261.1| prokaryotic dksA/traR C4-type zinc finger family protein [Piscirickettsia salmonis]_x0001_gb|KGP99069.1| prokaryotic dksA/traR C4-type zinc finger family protein [Pisci…	J
A0A0J1JEX9	argS	Arginine--tRNA ligase	-15.4283	6.84438	5.29915	Piscirickettsia salmonis LF-89 = ATCC VR-1361.	Bacteria; Proteobacteria; Gammaproteobacteria; Thiotrichales;Piscirickettsiaceae; Piscirickettsia.	1227812	PSLF89_393	chromosome	arginine--tRNA ligase	arginyl-tRNA synthetase [Piscirickettsia salmonis]_x0001_gb|KGP96263.1| arginine--tRNA ligase [Piscirickettsia salmonis]	J
A0A0H4QY51	hslU	ATP-dependent protease ATPase subunit HslU	-22.7097	8.19108	12.3894	Piscirickettsia salmonis LF-89 = ATCC VR-1361.	Bacteria; Proteobacteria; Gammaproteobacteria; Thiotrichales;Piscirickettsiaceae; Piscirickettsia.	1227812	PSLF89_396	chromosome	ATP-dependent protease ATP-binding subunit HslU	ATP-dependent protease [Piscirickettsia salmonis]_x0001_gb|KGP96266.1| ATP-dependent protease [Piscirickettsia salmonis]	O
U4TPQ0	gyrB	DNA gyrase subunit B	-28.1405	7.82169	5.78406	Piscirickettsia salmonis LF-89 = ATCC VR-1361.	Bacteria; Proteobacteria; Gammaproteobacteria; Thiotrichales;Piscirickettsiaceae; Piscirickettsia.	1227812	PSLF89_4	chromosome	DNA gyrase subunit B	DNA gyrase subunit B [Piscirickettsia salmonis]_x0001_gb|KGP98239.1| DNA gyrase, B subunit [Piscirickettsia salmonis]	L
A0A0J1JEY7	leuS	Leucine--tRNA ligase	-16.3371	7.31754	3.38983	Piscirickettsia salmonis LF-89 = ATCC VR-1361.	Bacteria; Proteobacteria; Gammaproteobacteria; Thiotrichales;Piscirickettsiaceae; Piscirickettsia.	1227812	PSLF89_405	chromosome	leucine--tRNA ligase	leucyl-tRNA synthetase [Piscirickettsia salmonis]_x0001_gb|KGP96275.1| leucine--tRNA ligase [Piscirickettsia salmonis]	J
U4TKJ5	mltB	Lytic murein transglycosylase B	-15.9096	7.17048	5.09915	Piscirickettsia salmonis LF-89 = ATCC VR-1361.	Bacteria; Proteobacteria; Gammaproteobacteria; Thiotrichales;Piscirickettsiaceae; Piscirickettsia.	1227812	PSLF89_414	chromosome	lytic murein transglycosylase	hypothetical protein [Piscirickettsia salmonis]	M	(gi:66047584) hopAJ2 (Psyr_4357) - type III effector HopAJ2 [Pseudomonas syringae str. B728a (pv. syringae)]	Toxin, efector protein
U4TMS5	K661_00772	4a-hydroxytetrahydrobiopterin dehydratase	-17.0223	7.20972	14.7368	Piscirickettsia salmonis LF-89 = ATCC VR-1361.	Bacteria; Proteobacteria; Gammaproteobacteria; Thiotrichales;Piscirickettsiaceae; Piscirickettsia.	1227812	PSLF89_446	chromosome	pterin-4-alpha-carbinolamine dehydratase	hypothetical protein [Piscirickettsia salmonis]_x0001_gb|KGP96067.1| putative pterin-4-alpha-carbinolamine dehydratase [Piscirickettsia salmonis]	H
A0A0H4R048	nrdB	Ribonucleoside-diphosphate reductase subunit beta	-43.8602	7.58652	14.2857	Piscirickettsia salmonis LF-89 = ATCC VR-1361.	Bacteria; Proteobacteria; Gammaproteobacteria; Thiotrichales;Piscirickettsiaceae; Piscirickettsia.	1227812	PSLF89_450	chromosome	ribonucleotide-diphosphate reductase subunit beta	hypothetical protein [Piscirickettsia salmonis]_x0001_gb|KGP96070.1| ribonucleotide reductase, small chain family protein [Piscirickettsia salmonis]	F
U4TDR0	K661_00776	Ribonucleoside-diphosphate reductase	-28.5115	7.4718	3.14534	Piscirickettsia salmonis LF-89 = ATCC VR-1361.	Bacteria; Proteobacteria; Gammaproteobacteria; Thiotrichales;Piscirickettsiaceae; Piscirickettsia.	1227812	PSLF89_451	chromosome	ribonucleotide-diphosphate reductase subunit alpha	hypothetical protein [Piscirickettsia salmonis]_x0001_gb|KGP96071.1| ribonucleoside-diphosphate reductase, alpha subunit [Piscirickettsia salmonis]	F
A0A0H4REV4	argD	Acetylornithine aminotransferase	-133.77	8.67613	34.6354	Piscirickettsia salmonis LF-89 = ATCC VR-1361.	Bacteria; Proteobacteria; Gammaproteobacteria; Thiotrichales;Piscirickettsiaceae; Piscirickettsia.	1227812	PSLF89_452	chromosome	acetylornithine aminotransferase	hypothetical protein [Piscirickettsia salmonis]_x0001_gb|KGP96072.1| transaminase, acetylornithine/succinylornithine family protein[Piscirickettsia salmonis]	E
A0A0J1JBZ9	AB894_07895	Uncharacterized protein	-10	7.50737	7.86517	Piscirickettsia salmonis LF-89 = ATCC VR-1361.	Bacteria; Proteobacteria; Gammaproteobacteria; Thiotrichales;Piscirickettsiaceae; Piscirickettsia.	1227812	PSLF89_453	chromosome	hypothetical protein	hypothetical protein [Piscirickettsia salmonis]_x0001_gb|KGP96073.1| alkylhydroperoxidase [Piscirickettsia salmonis]	P
U4TFP8	ppc	Phosphoenolpyruvate carboxylase	-11.3076	6.69665	2.45726	Piscirickettsia salmonis LF-89 = ATCC VR-1361.	Bacteria; Proteobacteria; Gammaproteobacteria; Thiotrichales;Piscirickettsiaceae; Piscirickettsia.	1227812	PSLF89_462	chromosome	phosphoenolpyruvate carboxylase	hypothetical protein [Piscirickettsia salmonis]_x0001_gb|KGP95947.1| phosphoenolpyruvate carboxylase [Piscirickettsia salmonis]	C
A0A0J1JCP0	tdh	L-threonine 3-dehydrogenase	-28.072	7.73792	8.21114	Piscirickettsia salmonis LF-89 = ATCC VR-1361.	Bacteria; Proteobacteria; Gammaproteobacteria; Thiotrichales;Piscirickettsiaceae; Piscirickettsia.	1227812	PSLF89_490	chromosome	L-threonine 3-dehydrogenase	L-threonine 3-dehydrogenase [Piscirickettsia salmonis]_x0001_gb|KGP95919.1| L-threonine 3-dehydrogenase [Piscirickettsia salmonis]	ER
A0A0J1JDX4	fumC	Fumarate hydratase class II	-69.2874	7.97285	18.7905	Piscirickettsia salmonis LF-89 = ATCC VR-1361.	Bacteria; Proteobacteria; Gammaproteobacteria; Thiotrichales;Piscirickettsiaceae; Piscirickettsia.	1227812	PSLF89_540	chromosome	class II fumarate hydratase	hypothetical protein [Piscirickettsia salmonis]_x0001_gb|KGP94735.1| fumarate hydratase, class II [Piscirickettsia salmonis]_x0001_gb|KGP96428.1| fumarate hydratase, class II [Piscirickettsia salmonis]	C
A0A0J1JF54	AB894_01735	Uncharacterized protein	-5.88037	7.79072	9.15493	Piscirickettsia salmonis LF-89 = ATCC VR-1361.	Bacteria; Proteobacteria; Gammaproteobacteria; Thiotrichales;Piscirickettsiaceae; Piscirickettsia.	1227812	PSLF89_552	chromosome	hypothetical protein	drug resistance transporter, Bcr/CflA subfamily protein [Piscirickettsia salmonis]	G
A0A0J1LYD9	purB	Adenylosuccinate lyase	-30.28	7.68535	15.3509	Piscirickettsia salmonis LF-89 = ATCC VR-1361.	Bacteria; Proteobacteria; Gammaproteobacteria; Thiotrichales;Piscirickettsiaceae; Piscirickettsia.	1227812	PSLF89_593	chromosome	adenylosuccinate lyase	hypothetical protein [Piscirickettsia salmonis]_x0001_gb|KGP93810.1| adenylosuccinate lyase [Piscirickettsia salmonis]	F
A0A0J1J7U8	ibpA	Heat-shock protein	-9.29476	6.85608	6.41026	Piscirickettsia salmonis LF-89 = ATCC VR-1361.	Bacteria; Proteobacteria; Gammaproteobacteria; Thiotrichales;Piscirickettsiaceae; Piscirickettsia.	1227812	PSLF89_594	chromosome	heat-shock protein	hypothetical protein [Piscirickettsia salmonis]_x0001_gb|KGP93809.1| hsp20/alpha crystallin family protein [Piscirickettsia salmonis]	O
A0A0J1JC56	acnA	Aconitate hydratase	-123.123	8.73218	17.7455	Piscirickettsia salmonis LF-89 = ATCC VR-1361.	Bacteria; Proteobacteria; Gammaproteobacteria; Thiotrichales;Piscirickettsiaceae; Piscirickettsia.	1227812	PSLF89_601	chromosome	aconitate hydratase	hypothetical protein [Piscirickettsia salmonis]_x0001_gb|KGP96988.1| aconitate hydratase 1 [Piscirickettsia salmonis]	C
A0A0H4R0M2	PSLF89_651	Delta 9 acyl-lipid fatty acid desaturase	-10.7147	5.47349	3.58056	Piscirickettsia salmonis LF-89 = ATCC VR-1361.	Bacteria; Proteobacteria; Gammaproteobacteria; Thiotrichales;Piscirickettsiaceae; Piscirickettsia.	1227812	PSLF89_651	chromosome	hypothetical protein	fatty acid desaturase family protein [Piscirickettsia salmonis]_x0001_gb|KGP95980.1| fatty acid desaturase family protein [Piscirickettsia salmonis]	I
A0A0J1M4E2	deoD	Purine nucleoside phosphorylase DeoD-type	-21.4146	7.63669	18.3761	Piscirickettsia salmonis LF-89 = ATCC VR-1361.	Bacteria; Proteobacteria; Gammaproteobacteria; Thiotrichales;Piscirickettsiaceae; Piscirickettsia.	1227812	PSLF89_670	chromosome	purine nucleoside phosphorylase DeoD-type	purine nucleoside phosphorylase DeoD-type [Piscirickettsia salmonis]_x0001_gb|KGP96405.1| purine nucleoside phosphorylase DeoD-type [Piscirickettsia salmonis]	F
U4TF13	K661_00330	Glycosyl transferase 2 family protein	-13.5686	6.84303	3.58209	Piscirickettsia salmonis LF-89 = ATCC VR-1361.	Bacteria; Proteobacteria; Gammaproteobacteria; Thiotrichales;Piscirickettsiaceae; Piscirickettsia.	1227812	PSLF89_709	chromosome	UDP-4-amino-4-deoxy-L-arabinose-oxoglutarate aminotransferase	hypothetical protein [Piscirickettsia salmonis]_x0001_gb|KGP97286.1| glycosyl transferase 2 family protein [Piscirickettsia salmonis]_x0001_gb|KGP98092.1| glycosyl transferase 2 family protein [Piscirickettsia salmonis]	M	(gi:24111748) gtrB (SF0306) - putative bactoprenol glucosyl transferase [Shigella flexneri str. 301 (serotype 2a)]	Host immune evasion, molecular mimicry
A0A0J1JBY9	yjgF	Endoribonuclease	-12.897	7.05385	16.9231	Piscirickettsia salmonis LF-89 = ATCC VR-1361.	Bacteria; Proteobacteria; Gammaproteobacteria; Thiotrichales;Piscirickettsiaceae; Piscirickettsia.	1227812	PSLF89_712	chromosome	reactive intermediate/imine deaminase	hypothetical protein [Piscirickettsia salmonis]_x0001_gb|KGP97289.1| L-PSP putative endoribonuclease [Piscirickettsia salmonis]_x0001_gb|KGP98097.1| L-PSP putative endoribonuclease [Piscirickettsia salmonis]	V
A0A0J1JC61	oppF	OppF	-9.65041	7.30602	8.30769	Piscirickettsia salmonis LF-89 = ATCC VR-1361.	Bacteria; Proteobacteria; Gammaproteobacteria; Thiotrichales;Piscirickettsiaceae; Piscirickettsia.	1227812	PSLF89_719	chromosome	peptide ABC transporter ATP-binding protein	hypothetical protein [Piscirickettsia salmonis]_x0001_gb|KGP97296.1| oligopeptide/dipeptide ABC transporter, ATP-binding , C-terminal domain protein [Piscirickettsia salmonis]	E	(gi:42561491) oppF (MSC_0975) - oligopeptide ABC transporter, permease component [Mycoplasma mycoides str. PG1]	Antiphagocytosis, capsule
A0A0J1JBZ3	ORFNames=AB894_07560, PSLF89_720	RNA-binding protein	-69.0584	8.10279	77.5281	Piscirickettsia salmonis LF-89 = ATCC VR-1361.	Bacteria; Proteobacteria; Gammaproteobacteria; Thiotrichales;Piscirickettsiaceae; Piscirickettsia.	1227812	PSLF89_720	chromosome	RNA-binding protein	hypothetical protein [Piscirickettsia salmonis]_x0001_gb|KGP97297.1| RNA recognition motif family protein [Piscirickettsia salmonis]_x0001_gb|KGP99647.1| RNA recognition motif family protein [Piscirickettsia salmonis]	J
U4TGQ4	K661_00343	Cro/C1-type HTH DNA-binding domain protein	-42.5832	7.92743	18.1416	Piscirickettsia salmonis LF-89 = ATCC VR-1361.	Bacteria; Proteobacteria; Gammaproteobacteria; Thiotrichales;Piscirickettsiaceae; Piscirickettsia.	1227812	PSLF89_723	chromosome	hypothetical protein	hypothetical protein [Piscirickettsia salmonis]_x0001_gb|KGP97299.1| cro/C1-type HTH DNA-binding domain protein [Piscirickettsia salmonis]	No orthologs found
A0A0J1JE08	prfC	Peptide chain release factor 3	-12.1763	6.83227	2.47619	Piscirickettsia salmonis LF-89 = ATCC VR-1361.	Bacteria; Proteobacteria; Gammaproteobacteria; Thiotrichales;Piscirickettsiaceae; Piscirickettsia.	1227812	PSLF89_758	chromosome	peptide chain release factor 3	hypothetical protein [Piscirickettsia salmonis]_x0001_gb|KGP94528.1| peptide chain release factor 3 [Piscirickettsia salmonis]	J	(gi:72080854) tuf (MHP7448_0523) - elongation factor Tu [Mycoplasma hyopneumoniae str. 7448]	Adhesins, adherence and adhesion-related proteins
U4TFN2	K661_01425	Tim44-like domain protein	-8.08189	8.41366	7.86517	Piscirickettsia salmonis LF-89 = ATCC VR-1361.	Bacteria; Proteobacteria; Gammaproteobacteria; Thiotrichales;Piscirickettsiaceae; Piscirickettsia.	1227812	PSLF89_760	chromosome	hypothetical protein	hypothetical protein [Piscirickettsia salmonis]_x0001_gb|KGP94530.1| tim44-like domain protein [Piscirickettsia salmonis]	I
A0A0J1JAK2	ORFNames=AB894_10060, PSLF89_774	Amino acid ABC transporter periplasmic protein	-4.186	7.11974	9.70464	Piscirickettsia salmonis LF-89 = ATCC VR-1361.	Bacteria; Proteobacteria; Gammaproteobacteria; Thiotrichales;Piscirickettsiaceae; Piscirickettsia.	1227812	PSLF89_774	chromosome	hypothetical protein	hypothetical protein [Piscirickettsia salmonis]_x0001_gb|KGP95829.1| bacterial extracellular solute-binding s, 3 family protein [Piscirickettsia salmonis]	ET
U4TJH7	K661_01848	Phosphatase 2C family protein	-4.53186	7.72501	15.2838	Piscirickettsia salmonis LF-89 = ATCC VR-1361.	Bacteria; Proteobacteria; Gammaproteobacteria; Thiotrichales;Piscirickettsiaceae; Piscirickettsia.	1227812	PSLF89_776	chromosome	phosphatase	hypothetical protein [Piscirickettsia salmonis]_x0001_gb|KGP95828.1| phosphatase 2C family protein [Piscirickettsia salmonis]	T	(gi:70733362) pppA (PFL_6079) - Ser/Thr protein phosphatase, putative [Pseudomonas fluorescens str. Pf-5]	Secretion system
A0A0H4R138	nanK	NanK	-13.3435	6.61257	7.50853	Piscirickettsia salmonis LF-89 = ATCC VR-1361.	Bacteria; Proteobacteria; Gammaproteobacteria; Thiotrichales;Piscirickettsiaceae; Piscirickettsia.	1227812	PSLF89_802	chromosome	ROK family protein	hypothetical protein [Piscirickettsia salmonis]_x0001_gb|KGP95308.1| ROK family protein [Piscirickettsia salmonis]	KG
A0A0J1JB41	AB894_09145	N-acetylneuraminate lyase	-85.4674	8.51307	35.7143	Piscirickettsia salmonis LF-89 = ATCC VR-1361.	Bacteria; Proteobacteria; Gammaproteobacteria; Thiotrichales;Piscirickettsiaceae; Piscirickettsia.	1227812	PSLF89_804	chromosome	dihydrodipicolinate synthase family protein	N-acetylneuraminate lyase [Piscirickettsia salmonis]_x0001_gb|KGP95310.1| N-acetylneuraminate lyase [Piscirickettsia salmonis]	EM
A0A0H4R146	ppsA	Phosphoenolpyruvate synthase	-41.7722	7.49855	5.56962	Piscirickettsia salmonis LF-89 = ATCC VR-1361.	Bacteria; Proteobacteria; Gammaproteobacteria; Thiotrichales;Piscirickettsiaceae; Piscirickettsia.	1227812	PSLF89_814	chromosome	phosphoenolpyruvate synthase	phosphoenolpyruvate synthase [Piscirickettsia salmonis]	G
A0A0J1J9Z1	ORFNames=AB894_11130, PSLF89_826	Uncharacterized protein	-39.6216	7.96384	10.4348	Piscirickettsia salmonis LF-89 = ATCC VR-1361.	Bacteria; Proteobacteria; Gammaproteobacteria; Thiotrichales;Piscirickettsiaceae; Piscirickettsia.	1227812	PSLF89_826	chromosome	hypothetical protein	hypothetical protein [Piscirickettsia salmonis]_x0001_gb|KGP96352.1| hypothetical protein KU39_01772 [Piscirickettsia salmonis]	No orthologs found
A0A0H4QYU4	recJ	RecJ	-9.73964	8.01	7.11864	Piscirickettsia salmonis LF-89 = ATCC VR-1361.	Bacteria; Proteobacteria; Gammaproteobacteria; Thiotrichales;Piscirickettsiaceae; Piscirickettsia.	1227812	PSLF89_828	chromosome	single-stranded-DNA-specific exonuclease RecJ	hypothetical protein [Piscirickettsia salmonis]_x0001_gb|KGP96350.1| single-stranded-DNA-specific exonuclease RecJ [Piscirickettsia salmonis]	L
A0A0J1JFN3	recD2	ATP-dependent RecD-like DNA helicase	-4.49638	7.71451	1.92308	Piscirickettsia salmonis LF-89 = ATCC VR-1361.	Bacteria; Proteobacteria; Gammaproteobacteria; Thiotrichales;Piscirickettsiaceae; Piscirickettsia.	1227812	PSLF89_83	chromosome	glycine--tRNA ligase subunit alpha	glycyl-tRNA synthetase [Piscirickettsia salmonis]_x0001_gb|KGP95695.1| glycyl-tRNA synthetase [Piscirickettsia salmonis]	J
A0A0H4QX94	csd	Csd	-5.12644	7.51188	6.79612	Piscirickettsia salmonis LF-89 = ATCC VR-1361.	Bacteria; Proteobacteria; Gammaproteobacteria; Thiotrichales;Piscirickettsiaceae; Piscirickettsia.	1227812	PSLF89_839	chromosome	cysteine desulfurase	cysteine desulfurase [Piscirickettsia salmonis]	E
A0A0H4QXB3	pepN	PepN	-35.5322	7.5551	4.62754	Piscirickettsia salmonis LF-89 = ATCC VR-1361.	Bacteria; Proteobacteria; Gammaproteobacteria; Thiotrichales;Piscirickettsiaceae; Piscirickettsia.	1227812	PSLF89_866	chromosome	aminopeptidase N	aminopeptidase N [Piscirickettsia salmonis]_x0001_gb|KGP94126.1| aminopeptidase N [Piscirickettsia salmonis]	E
A0A0J1JDC5	AB894_05125	Succinyl-CoA:3-ketoacid-CoA transferase	-11.4305	6.98463	11.0092	Piscirickettsia salmonis LF-89 = ATCC VR-1361.	Bacteria; Proteobacteria; Gammaproteobacteria; Thiotrichales;Piscirickettsiaceae; Piscirickettsia.	1227812	PSLF89_868	chromosome	succinyl-CoA--3-ketoacid-CoA transferase	succinyl-CoA:3-ketoacid-CoA transferase [Piscirickettsia salmonis]_x0001_gb|KGP94124.1| succinyl-CoA:3-ketoacid-CoA transferase [Piscirickettsia salmonis]	I
A0A0H4QZ96	liuF	LiuF	-11.8558	7.43751	12.3932	Piscirickettsia salmonis LF-89 = ATCC VR-1361.	Bacteria; Proteobacteria; Gammaproteobacteria; Thiotrichales;Piscirickettsiaceae; Piscirickettsia.	1227812	PSLF89_869	chromosome	succinyl-CoA--3-ketoacid-CoA transferase	succinyl-CoA:3-ketoacid-CoA transferase [Piscirickettsia salmonis]_x0001_gb|KGP94123.1| succinyl-CoA:3-ketoacid-CoA transferase [Piscirickettsia salmonis]	I
U4TEP3	gltA	Citrate synthase	-121.403	9.06435	27.8689	Piscirickettsia salmonis LF-89 = ATCC VR-1361.	Bacteria; Proteobacteria; Gammaproteobacteria; Thiotrichales;Piscirickettsiaceae; Piscirickettsia.	1227812	PSLF89_893	chromosome	type II citrate synthase	hypothetical protein [Piscirickettsia salmonis]_x0001_gb|KGP96832.1| citrate (Si)-synthase [Piscirickettsia salmonis]	C
A0A0H4QYY9	sdhA	Succinate dehydrogenase flavoprotein subunit	-56.914	8.36141	15.1618	Piscirickettsia salmonis LF-89 = ATCC VR-1361.	Bacteria; Proteobacteria; Gammaproteobacteria; Thiotrichales;Piscirickettsiaceae; Piscirickettsia.	1227812	PSLF89_896	chromosome	succinate dehydrogenase	hypothetical protein [Piscirickettsia salmonis]_x0001_gb|KGP96829.1| succinate dehydrogenase, flavoprotein subunit [Piscirickettsia salmonis]	C
A0A0J1JBH8	sucA	2-oxoglutarate dehydrogenase	-107.561	8.43641	17.5777	Piscirickettsia salmonis LF-89 = ATCC VR-1361.	Bacteria; Proteobacteria; Gammaproteobacteria; Thiotrichales;Piscirickettsiaceae; Piscirickettsia.	1227812	PSLF89_898	chromosome	2-oxoglutarate dehydrogenase subunit E1	hypothetical protein [Piscirickettsia salmonis]_x0001_gb|KGP96827.1| oxoglutarate dehydrogenase (succinyl-transferring), E1 component[Piscirickettsia salmonis]	C
A0A0H4RFZ0	sucB	Dihydrolipoamide succinyltransferase	-27.8599	7.47212	9.1623	Piscirickettsia salmonis LF-89 = ATCC VR-1361.	Bacteria; Proteobacteria; Gammaproteobacteria; Thiotrichales;Piscirickettsiaceae; Piscirickettsia.	1227812	PSLF89_899	chromosome	dihydrolipoamide succinyltransferase	hypothetical protein [Piscirickettsia salmonis]_x0001_gb|KGP96826.1| dihydrolipoyllysine-residue succinyltransferase, E2 component of oxoglutarate dehydrogenase [Piscirickettsia salmonis]	C
U4TGV0	sucC	Succinyl-CoA ligase [ADP-forming] subunit beta	-26.3566	7.8832	7.77202	Piscirickettsia salmonis LF-89 = ATCC VR-1361.	Bacteria; Proteobacteria; Gammaproteobacteria; Thiotrichales;Piscirickettsiaceae; Piscirickettsia.	1227812	PSLF89_900	chromosome	succinyl-CoA synthetase subunit beta	succinate-CoA ligase, beta subunit [Piscirickettsia salmonis]_x0001_gb|ERL62630.1| succinate-CoA ligase, beta subunit [Piscirickettsia salmonis LF-89 = ATCC VR-1361]_x0001_gb|KGP96825.1| succinate-CoA ligase, beta subunit [Piscirickettsia salmonis]_x0001_gb|KGP99654.1| succinate-CoA ligase, beta subunit [Piscirickettsia salmonis]	C
U4TFH0	rplM	50S ribosomal protein L13	-10.2456	7.41025	24.0506	Piscirickettsia salmonis LF-89 = ATCC VR-1361.	Bacteria; Proteobacteria; Gammaproteobacteria; Thiotrichales;Piscirickettsiaceae; Piscirickettsia.	1227812	PSLF89_910	chromosome	50S ribosomal protein L13	50S ribosomal protein L13 [Piscirickettsia salmonis]_x0001_gb|KGP96018.1| 50S ribosomal protein L13 [Piscirickettsia salmonis]_x0001_gb|KGP98751.1| 50S ribosomal protein L13 [Piscirickettsia salmonis]	J
A0A0H4QXF2	gmhA	Phosphoheptose isomerase	-21.0506	7.26914	16.4948	Piscirickettsia salmonis LF-89 = ATCC VR-1361.	Bacteria; Proteobacteria; Gammaproteobacteria; Thiotrichales;Piscirickettsiaceae; Piscirickettsia.	1227812	PSLF89_914	chromosome	phosphoheptose isomerase	hypothetical protein [Piscirickettsia salmonis]_x0001_gb|KGP96022.1| phosphoheptose isomerase [Piscirickettsia salmonis]	G	(gi:118475208) gmhA (CFF8240_1410) - phosphoheptose isomerase [Campylobacter fetus str. 82-40 (subsp. fetus)]	Anti-apoptosis factor
A0A0H4QZ06	apt	Adenine phosphoribosyltransferase	-12.5313	7.17698	14.8352	Piscirickettsia salmonis LF-89 = ATCC VR-1361.	Bacteria; Proteobacteria; Gammaproteobacteria; Thiotrichales;Piscirickettsiaceae; Piscirickettsia.	1227812	PSLF89_917	chromosome	adenine phosphoribosyltransferase	hypothetical protein [Piscirickettsia salmonis]_x0001_gb|KGP96025.1| adenine phosphoribosyltransferase [Piscirickettsia salmonis]	F
U4TKG1	rplU	50S ribosomal protein L21	-4.61979	5.84935	11.1111	Piscirickettsia salmonis LF-89 = ATCC VR-1361.	Bacteria; Proteobacteria; Gammaproteobacteria; Thiotrichales;Piscirickettsiaceae; Piscirickettsia.	1227812	PSLF89_919	chromosome	50S ribosomal protein L21	50S ribosomal protein L21 [Piscirickettsia salmonis]_x0001_gb|KGP96027.1| 50S ribosomal protein L21 [Piscirickettsia salmonis]	J
U4TKA1	pseB	UDP-N-acetylglucosamine 4,6-dehydratase	-14.4289	7.61001	7.31707	Piscirickettsia salmonis LF-89 = ATCC VR-1361.	Bacteria; Proteobacteria; Gammaproteobacteria; Thiotrichales;Piscirickettsiaceae; Piscirickettsia.	1227812	PSLF89_935	chromosome	UDP-N-acetylglucosamine 4,6-dehydratase (inverting)	hypothetical protein [Piscirickettsia salmonis]_x0001_gb|KGP96790.1| UDP-N-acetylglucosamine 4,6-dehydratase [Piscirickettsia salmonis]	MO	(gi:121612602) pseB (CJJ81176_1310) - polysaccharide biosynthesis protein [Campylobacter jejuni str. 81-176 (subsp. jejuni)]	Glycosylation system
A0A0H4RG40	rkpN	NeuA	-10.3542	6.60483	9.09091	Piscirickettsia salmonis LF-89 = ATCC VR-1361.	Bacteria; Proteobacteria; Gammaproteobacteria; Thiotrichales;Piscirickettsiaceae; Piscirickettsia.	1227812	PSLF89_937	chromosome	pseudaminic acid cytidylyltransferase	hypothetical protein [Piscirickettsia salmonis]_x0001_gb|KGP96788.1| pseudaminic acid CMP-transferase [Piscirickettsia salmonis]	M	(gi:57238363) pseF (CJE1506) - CMP-N-acetylneuraminic acid synthetase [Campylobacter jejuni str. RM1221]	Glycosylation system
U4TCB4	thrS	Threonine--tRNA ligase	-24.8477	7.69632	3.88802	Piscirickettsia salmonis LF-89 = ATCC VR-1361.	Bacteria; Proteobacteria; Gammaproteobacteria; Thiotrichales;Piscirickettsiaceae; Piscirickettsia.	1227812	PSLF89_942	chromosome	threonine--tRNA ligase	threonyl-tRNA synthetase [Piscirickettsia salmonis]_x0001_gb|KGP96784.1| threonine--tRNA ligase [Piscirickettsia salmonis]	J
A0A0H4RG51	pheT	Phenylalanine--tRNA ligase beta subunit	-10.0248	6.83414	3.657	Piscirickettsia salmonis LF-89 = ATCC VR-1361.	Bacteria; Proteobacteria; Gammaproteobacteria; Thiotrichales;Piscirickettsiaceae; Piscirickettsia.	1227812	PSLF89_947	chromosome	phenylalanine--tRNA ligase subunit beta	hypothetical protein [Piscirickettsia salmonis]_x0001_gb|KGP96779.1| phenylalanine--tRNA ligase, beta subunit [Piscirickettsia salmonis]	J
A0A0H4RG56	gltB	GltB	-13.3657	7.12037	4.7619	Piscirickettsia salmonis LF-89 = ATCC VR-1361.	Bacteria; Proteobacteria; Gammaproteobacteria; Thiotrichales;Piscirickettsiaceae; Piscirickettsia.	1227812	PSLF89_955	chromosome	glutamate synthase	hypothetical protein [Piscirickettsia salmonis]_x0001_gb|KGP96772.1| FMN-dependent dehydrogenase family protein [Piscirickettsia salmonis]	E
U4TF97	rpsT	30S ribosomal protein S20	-15.0849	7.91568	30.2326	Piscirickettsia salmonis LF-89 = ATCC VR-1361.	Bacteria; Proteobacteria; Gammaproteobacteria; Thiotrichales;Piscirickettsiaceae; Piscirickettsia.	1227812	PSLF89_984	chromosome	30S ribosomal protein S20	30S ribosomal protein S20 [Piscirickettsia salmonis]_x0001_gb|ERL62085.1| ribosomal protein S20 [Piscirickettsia salmonis LF-89 = ATCC VR-1361]_x0001_gb|KGP95598.1| 30S ribosomal protein S20 [Piscirickettsia salmonis]_x0001_gb|KGP98207.1| 30S ribosomal protein S20 [Piscirickettsia salmonis]	J

## Sheet: P.sal vacuolization
Protein Name	gene name	description	E-value	Intensity	Coverage (%)	up_os	up_oc	ncbi_taxid	locus tag	Type	Description GenBank	nr description	COG letter	VFDB desc	VF family
A0A0J1JDP7	AB894_04170	Uncharacterized protein	-4.05588	6.16266	16.2162	Piscirickettsia salmonis LF-89 = ATCC VR-1361.	Bacteria; Proteobacteria; Gammaproteobacteria; Thiotrichales;Piscirickettsiaceae; Piscirickettsia.	1227812	PSLF89_04745	chromosome	hypothetical protein	hypothetical protein [Piscirickettsia salmonis]_x0001_gb|KGP94742.1| hypothetical protein KU39_02962 [Piscirickettsia salmonis]	No orthologs found
A0A0J1JB97	AB894_08890	Uncharacterized protein	-5.29351	6.30854	37.7049	Piscirickettsia salmonis LF-89 = ATCC VR-1361.	Bacteria; Proteobacteria; Gammaproteobacteria; Thiotrichales;Piscirickettsiaceae; Piscirickettsia.	1227812	PSLF89_08030	chromosome	hypothetical protein	hypothetical protein [Piscirickettsia salmonis]_x0001_gb|KGP98241.1| hypothetical protein KU39_00316 [Piscirickettsia salmonis]	No orthologs found
A0A0J1J7R4	AB894_15340	Uncharacterized protein	-4.66779	6.0175	26.2821	Piscirickettsia salmonis LF-89 = ATCC VR-1361.	Bacteria; Proteobacteria; Gammaproteobacteria; Thiotrichales;Piscirickettsiaceae; Piscirickettsia.	1227812	PSLF89_08380	pPSLF89-1	hypothetical protein	hypothetical protein [Piscirickettsia salmonis]_x0001_gb|KGP96724.1| hypothetical protein KU39_01488 [Piscirickettsia salmonis]_x0001_gb|KGP98530.1| hypothetical protein KU39_00008 [Piscirickettsia salmonis]	No orthologs found
U4TEU8	tkt	Transketolase	-8.91939	6.2531	6.5967	Piscirickettsia salmonis LF-89 = ATCC VR-1361.	Bacteria; Proteobacteria; Gammaproteobacteria; Thiotrichales;Piscirickettsiaceae; Piscirickettsia.	1227812	PSLF89_1024	chromosome	transketolase	hypothetical protein [Piscirickettsia salmonis]_x0001_gb|KGP97591.1| transketolase [Piscirickettsia salmonis]	G
U4TM53	pgk	Phosphoglycerate kinase	-5.34428	6.04046	8.12183	Piscirickettsia salmonis LF-89 = ATCC VR-1361.	Bacteria; Proteobacteria; Gammaproteobacteria; Thiotrichales;Piscirickettsiaceae; Piscirickettsia.	1227812	PSLF89_1026	chromosome	phosphoglycerate kinase	phosphoglycerate kinase [Piscirickettsia salmonis]_x0001_gb|KGP97589.1| phosphoglycerate kinase [Piscirickettsia salmonis]	G
U4TH08	pyk	Pyruvate kinase	-4.2409	5.61664	5.05263	Piscirickettsia salmonis LF-89 = ATCC VR-1361.	Bacteria; Proteobacteria; Gammaproteobacteria; Thiotrichales;Piscirickettsiaceae; Piscirickettsia.	1227812	PSLF89_1027	chromosome	pyruvate kinase	hypothetical protein [Piscirickettsia salmonis]_x0001_gb|KGP97588.1| pyruvate kinase [Piscirickettsia salmonis]	G
U4TFJ1	K661_02930	Uncharacterized protein	-5.99174	7.13449	6.14251	Piscirickettsia salmonis LF-89 = ATCC VR-1361.	Bacteria; Proteobacteria; Gammaproteobacteria; Thiotrichales;Piscirickettsiaceae; Piscirickettsia.	1227812	PSLF89_1035	chromosome	hypothetical protein	hypothetical protein [Piscirickettsia salmonis]	No orthologs found
A0A0J1JDQ8	scpB	Segregation and condensation protein B	-5.07753	5.99487	8.33333	Piscirickettsia salmonis LF-89 = ATCC VR-1361.	Bacteria; Proteobacteria; Gammaproteobacteria; Thiotrichales;Piscirickettsiaceae; Piscirickettsia.	1227812	PSLF89_1108	chromosome	segregation and condensation protein B	hypothetical protein [Piscirickettsia salmonis]_x0001_gb|KGP96105.1| segregation and condensation protein B [Piscirickettsia salmonis]	K
A0A0H4RGP6	gatA	Glutamyl-tRNA(Gln) amidotransferase subunit A	-14.4981	6.50964	11.5226	Piscirickettsia salmonis LF-89 = ATCC VR-1361.	Bacteria; Proteobacteria; Gammaproteobacteria; Thiotrichales;Piscirickettsiaceae; Piscirickettsia.	1227812	PSLF89_1218	chromosome	glutamyl-tRNA amidotransferase	hypothetical protein [Piscirickettsia salmonis]_x0001_gb|KGP98596.1| aspartyl/glutamyl-tRNA(Asn/Gln) amidotransferase, A subunit [Piscirickettsia salmonis]	J
A0A0J1J963	dapD	2,3,4,5-tetrahydropyridine-2,6-dicarboxylate N-succinyltransferase	-4.21937	6.34287	10.2564	Piscirickettsia salmonis LF-89 = ATCC VR-1361.	Bacteria; Proteobacteria; Gammaproteobacteria; Thiotrichales;Piscirickettsiaceae; Piscirickettsia.	1227812	PSLF89_1233	chromosome	2,3,4,5-tetrahydropyridine-2,6-dicarboxylate N-succinyltransferase	hypothetical protein [Piscirickettsia salmonis]_x0001_gb|KGP97702.1| 2,3,4,5-tetrahydropyridine-2,6-dicarboxylate N-succinyltransferase[Piscirickettsia salmonis]	E
A0A0J1J958	AB894_12755	Uridylate kinase	-4.05079	6.5267	7.7551	Piscirickettsia salmonis LF-89 = ATCC VR-1361.	Bacteria; Proteobacteria; Gammaproteobacteria; Thiotrichales;Piscirickettsiaceae; Piscirickettsia.	1227812	PSLF89_1240	chromosome	UMP kinase	hypothetical protein [Piscirickettsia salmonis]_x0001_gb|KGP97696.1| UMP kinase [Piscirickettsia salmonis]	F
U4TPL1	lanM	Type 2 lantibiotic biosynthesis LanM family protein	-11.8936	6.44822	5.02232	Piscirickettsia salmonis LF-89 = ATCC VR-1361.	Bacteria; Proteobacteria; Gammaproteobacteria; Thiotrichales;Piscirickettsiaceae; Piscirickettsia.	1227812	PSLF89_1277	chromosome	hypothetical protein	hypothetical protein [Piscirickettsia salmonis]_x0001_gb|KGP97669.1| type 2 lantibiotic biosynthesis LanM family protein [Piscirickettsia salmonis]	No orthologs found
U4TH37	K661_00126	Uncharacterized protein	-6.01819	6.47834	4.75352	Piscirickettsia salmonis LF-89 = ATCC VR-1361.	Bacteria; Proteobacteria; Gammaproteobacteria; Thiotrichales;Piscirickettsiaceae; Piscirickettsia.	1227812	PSLF89_1281	chromosome	hypothetical protein	hypothetical protein [Piscirickettsia salmonis]_x0001_gb|KGP97665.1| LysR family transcriptional regulator [Piscirickettsia salmonis]	No orthologs found
U4TD39	guaB	Inosine-5'-monophosphate dehydrogenase	-4.36455	7.16574	7.01031	Piscirickettsia salmonis LF-89 = ATCC VR-1361.	Bacteria; Proteobacteria; Gammaproteobacteria; Thiotrichales;Piscirickettsiaceae; Piscirickettsia.	1227812	PSLF89_1300	chromosome	IMP dehydrogenase	inosine 5'-monophosphate dehydrogenase [Piscirickettsia salmonis]_x0001_gb|KGP97140.1| inosine 5'-monophosphate dehydrogenase [Piscirickettsia salmonis]	T
A0A0J1JBQ9	trbG	Conjugal transfer protein	-5.26682	6.82953	6.62824	Piscirickettsia salmonis LF-89 = ATCC VR-1361.	Bacteria; Proteobacteria; Gammaproteobacteria; Thiotrichales;Piscirickettsiaceae; Piscirickettsia.	1227812	PSLF89_132	chromosome	conjugal transfer protein	hypothetical protein [Piscirickettsia salmonis]_x0001_gb|KGP97547.1| conjugal transfer family protein [Piscirickettsia salmonis]	U
U4TEJ1	K661_03283	Transposase DDE domain protein	-4.76754	6.01363	24.1071	Piscirickettsia salmonis LF-89 = ATCC VR-1361.	Bacteria; Proteobacteria; Gammaproteobacteria; Thiotrichales;Piscirickettsiaceae; Piscirickettsia.	1227812	PSLF89_1402	chromosome	hypothetical protein	hypothetical protein [Piscirickettsia salmonis]_x0001_gb|KGP96424.1| helix-turn-helix family protein [Piscirickettsia salmonis]	X
A0A0J1JBS5	ORFNames=AB894_08025, PSLF89_142	Methyltransferase	-4.26433	6.41041	3.14371	Piscirickettsia salmonis LF-89 = ATCC VR-1361.	Bacteria; Proteobacteria; Gammaproteobacteria; Thiotrichales;Piscirickettsiaceae; Piscirickettsia.	1227812	PSLF89_142	chromosome	methyltransferase	methyltransferase [Piscirickettsia salmonis]	QR
A0A0J1JCE7	ORFNames=AB894_06475, PSLF89_1486	Uncharacterized protein	-4.51529	6.47562	3.2882	Piscirickettsia salmonis LF-89 = ATCC VR-1361.	Bacteria; Proteobacteria; Gammaproteobacteria; Thiotrichales;Piscirickettsiaceae; Piscirickettsia.	1227812	PSLF89_1486	chromosome	hypothetical protein	hypothetical protein [Piscirickettsia salmonis]_x0001_gb|KGP94335.1| kinase domain protein [Piscirickettsia salmonis]	No orthologs found
A0A0J1M4D5	yohD	Uncharacterized protein	-6.9888	7.20316	18.8482	Piscirickettsia salmonis LF-89 = ATCC VR-1361.	Bacteria; Proteobacteria; Gammaproteobacteria; Thiotrichales;Piscirickettsiaceae; Piscirickettsia.	1227812	PSLF89_1554	chromosome	hypothetical protein	membrane protein [Piscirickettsia salmonis]	S
U4TJ74	rlmN	Dual-specificity RNA methyltransferase RlmN	-4.36294	6.18017	7.58808	Piscirickettsia salmonis LF-89 = ATCC VR-1361.	Bacteria; Proteobacteria; Gammaproteobacteria; Thiotrichales;Piscirickettsiaceae; Piscirickettsia.	1227812	PSLF89_1571	chromosome	23S rRNA (adenine(2503)-C2)-methyltransferase	23S rRNA methyltransferase [Piscirickettsia salmonis]	J
U4TLY3	K661_00721	Gram-negative pili assembly chaperone, N-terminal domain protein	-4.07554	5.72929	11.1554	Piscirickettsia salmonis LF-89 = ATCC VR-1361.	Bacteria; Proteobacteria; Gammaproteobacteria; Thiotrichales;Piscirickettsiaceae; Piscirickettsia.	1227812	PSLF89_1770	chromosome	pilus assembly protein	hypothetical protein [Piscirickettsia salmonis]_x0001_gb|KGP96528.1| gram-negative pili assembly chaperone, N-terminal domain protein[Piscirickettsia salmonis]	W
U4TI18	htpG	Chaperone protein HtpG	-4.10448	6.96371	2.51177	Piscirickettsia salmonis LF-89 = ATCC VR-1361.	Bacteria; Proteobacteria; Gammaproteobacteria; Thiotrichales;Piscirickettsiaceae; Piscirickettsia.	1227812	PSLF89_1814	chromosome	molecular chaperone HtpG	hypothetical protein [Piscirickettsia salmonis]_x0001_gb|KGP96139.1| chaperone protein htpG [Piscirickettsia salmonis]	O
U4TDP5	K661_02142	Pentapeptide repeats family protein	-4.55582	6.11346	8.83281	Piscirickettsia salmonis LF-89 = ATCC VR-1361.	Bacteria; Proteobacteria; Gammaproteobacteria; Thiotrichales;Piscirickettsiaceae; Piscirickettsia.	1227812	PSLF89_1857	chromosome	hypothetical protein	hypothetical protein [Piscirickettsia salmonis]_x0001_gb|KGP98338.1| pentapeptide repeats family protein [Piscirickettsia salmonis]	No orthologs found
A0A0J1LZQ0	ORFNames=AB894_11935, PSLF89_1860	Guanylate kinase	-4.98338	7.51621	9.82659	Piscirickettsia salmonis LF-89 = ATCC VR-1361.	Bacteria; Proteobacteria; Gammaproteobacteria; Thiotrichales;Piscirickettsiaceae; Piscirickettsia.	1227812	PSLF89_1860	chromosome	guanylate kinase	hypothetical protein [Piscirickettsia salmonis]_x0001_gb|KGP98341.1| guanylate kinase family protein [Piscirickettsia salmonis]	No orthologs found
U4TFG3	K661_00737	AAA-like domain protein	-4.00432	6.11734	2.20884	Piscirickettsia salmonis LF-89 = ATCC VR-1361.	Bacteria; Proteobacteria; Gammaproteobacteria; Thiotrichales;Piscirickettsiaceae; Piscirickettsia.	1227812	PSLF89_1880	chromosome	AAA family ATPase	hypothetical protein [Piscirickettsia salmonis]_x0001_gb|KGP98324.1| type IV secretion system protein IcmB [Piscirickettsia salmonis]	U	(gi:54293449) icmB/dotO (lpl0498) - hypothetical protein [Legionella pneumophila str. Lens]	Secretion system
A0A0J1J9F0	ORFNames=AB894_12205, PSLF89_1908	Endonuclease/exonuclease/phosphatase	-4.29495	7.08012	6.20155	Piscirickettsia salmonis LF-89 = ATCC VR-1361.	Bacteria; Proteobacteria; Gammaproteobacteria; Thiotrichales;Piscirickettsiaceae; Piscirickettsia.	1227812	PSLF89_1908	chromosome	endonuclease/exonuclease/phosphatase	endonuclease/exonuclease/phosphatase [Piscirickettsia salmonis]	R	(gi:57865922) hlb (SERP2544) - beta-hemolysin [Staphylococcus epidermidis str. RP62A]	Toxin, efector protein
A0A0H4R3H2	psd	Phosphatidylserine decarboxylase proenzyme	-8.42627	6.04889	9.12052	Piscirickettsia salmonis LF-89 = ATCC VR-1361.	Bacteria; Proteobacteria; Gammaproteobacteria; Thiotrichales;Piscirickettsiaceae; Piscirickettsia.	1227812	PSLF89_1919	chromosome	phosphatidylserine decarboxylase	hypothetical protein [Piscirickettsia salmonis]_x0001_gb|KGP95414.1| phosphatidylserine decarboxylase [Piscirickettsia salmonis]	I
A0A0H4R1I8	katB	Catalase	-4.06083	6.87527	4.69388	Piscirickettsia salmonis LF-89 = ATCC VR-1361.	Bacteria; Proteobacteria; Gammaproteobacteria; Thiotrichales;Piscirickettsiaceae; Piscirickettsia.	1227812	PSLF89_1927	chromosome	catalase	catalase [Piscirickettsia salmonis]	P
A0A0H4R105	folC	Bifunctional FolC family protein	-4.52776	8.47858	4.04762	Piscirickettsia salmonis LF-89 = ATCC VR-1361.	Bacteria; Proteobacteria; Gammaproteobacteria; Thiotrichales;Piscirickettsiaceae; Piscirickettsia.	1227812	PSLF89_1950	chromosome	bifunctional FolC family protein	hypothetical protein [Piscirickettsia salmonis]_x0001_gb|KGP95255.1| bifunctional FolC family protein [Piscirickettsia salmonis]	H
A0A0J1J8Z9	purA	Adenylosuccinate synthetase	-4.45754	6.35364	4.86111	Piscirickettsia salmonis LF-89 = ATCC VR-1361.	Bacteria; Proteobacteria; Gammaproteobacteria; Thiotrichales;Piscirickettsiaceae; Piscirickettsia.	1227812	PSLF89_1977	chromosome	adenylosuccinate synthetase	hypothetical protein [Piscirickettsia salmonis]_x0001_gb|KGP97195.1| adenylosuccinate synthase [Piscirickettsia salmonis]	F
U4TBI9	K661_02113	PLD-like domain protein	-5.16747	6.65517	2.4055	Piscirickettsia salmonis LF-89 = ATCC VR-1361.	Bacteria; Proteobacteria; Gammaproteobacteria; Thiotrichales;Piscirickettsiaceae; Piscirickettsia.	1227812	PSLF89_1p169	pPSLF89-1	PLD-like domain protein	PLD-like domain protein [Piscirickettsia salmonis]_x0001_gb|ERL60621.1| PLD-like domain protein [Piscirickettsia salmonis LF-89 = ATCC VR-1361]_x0001_gb|KGP94387.1| PLD-like domain protein [Piscirickettsia salmonis]_x0001_gb|KGP95537.1| PLD-like domain protein [Piscirickettsia salmonis]	I	(gi:294502057) ymt (YPZ3_pMT0065) - murine toxin [Yersinia pestis str. Z176003 plasmid pMT1]	Toxin, efector protein
A0A0J1LYF1	fic	Cell filamentation protein Fic	-4.50778	7.09004	11.4035	Piscirickettsia salmonis LF-89 = ATCC VR-1361.	Bacteria; Proteobacteria; Gammaproteobacteria; Thiotrichales;Piscirickettsiaceae; Piscirickettsia.	1227812	PSLF89_1p174	pPSLF89-1	cell filamentation protein Fic	hypothetical protein [Piscirickettsia salmonis]_x0001_gb|KGP94393.1| fic/DOC family protein [Piscirickettsia salmonis]_x0001_gb|KGP95542.1| fic/DOC family protein [Piscirickettsia salmonis]	K
A0A0J1JDZ3	ORFNames=AB894_04005, AB894_15185	DNA helicase	-4.29412	6.56571	2.73752	Piscirickettsia salmonis LF-89 = ATCC VR-1361.	Bacteria; Proteobacteria; Gammaproteobacteria; Thiotrichales;Piscirickettsiaceae; Piscirickettsia.	1227812	PSLF89_1p61	pPSLF89-1	hypothetical protein	hypothetical protein [Piscirickettsia salmonis]_x0001_gb|KGP94510.1| DNA helicase [Piscirickettsia salmonis]	L
U4T9Y7	rpsP	30S ribosomal protein S16	-5.19642	7.681	19.5122	Piscirickettsia salmonis LF-89 = ATCC VR-1361.	Bacteria; Proteobacteria; Gammaproteobacteria; Thiotrichales;Piscirickettsiaceae; Piscirickettsia.	1227812	PSLF89_2004	chromosome	30S ribosomal protein S16	30S ribosomal protein S16 [Piscirickettsia salmonis]_x0001_gb|ERL61541.1| ribosomal protein S16 [Piscirickettsia salmonis LF-89 = ATCC VR-1361]_x0001_gb|KGP96623.1| ribosomal protein S16 [Piscirickettsia salmonis]_x0001_gb|KGP99191.1| ribosomal protein S16 [Piscirickettsia salmonis]	J
A0A0J1JF06	typA	GTP-binding protein TypA	-14.7213	5.85841	6.12583	Piscirickettsia salmonis LF-89 = ATCC VR-1361.	Bacteria; Proteobacteria; Gammaproteobacteria; Thiotrichales;Piscirickettsiaceae; Piscirickettsia.	1227812	PSLF89_203	chromosome	GTP-binding protein TypA	GTP-binding protein TypA [Piscirickettsia salmonis]_x0001_gb|KGP95025.1| GTP-binding protein TypA [Piscirickettsia salmonis]	T	(gi:42560712) tuf (MSC_0160) - translation elongation factor Tu [Mycoplasma mycoides str. PG1]	Adhesins, adherence and adhesion-related proteins
A0A0J1JA78	AB894_10765	ABC transporter ATP-binding protein	-4.33479	5.74185	2.44361	Piscirickettsia salmonis LF-89 = ATCC VR-1361.	Bacteria; Proteobacteria; Gammaproteobacteria; Thiotrichales;Piscirickettsiaceae; Piscirickettsia.	1227812	PSLF89_2105	chromosome	ABC transporter ATP-binding protein	ABC transporter ATP-binding protein [Piscirickettsia salmonis]	R	(gi:300858408) ciuD (cpfrc_00990) - iron ABC transporter ATP-binding protein [Corynebacterium pseudotuberculosis str. FRC41]	Metal uptake and heme acquisition
A0A0J1JA79	sufR	FeS assembly SUF system regulator	-5.0568	6.03457	28.4768	Piscirickettsia salmonis LF-89 = ATCC VR-1361.	Bacteria; Proteobacteria; Gammaproteobacteria; Thiotrichales;Piscirickettsiaceae; Piscirickettsia.	1227812	PSLF89_2127	chromosome	feS assembly SUF system regulator	feS assembly SUF system regulator [Piscirickettsia salmonis]	K
A0A0H4RIS7	ald	Alanine dehydrogenase	-4.62251	6.13267	5.89812	Piscirickettsia salmonis LF-89 = ATCC VR-1361.	Bacteria; Proteobacteria; Gammaproteobacteria; Thiotrichales;Piscirickettsiaceae; Piscirickettsia.	1227812	PSLF89_2154	chromosome	alanine dehydrogenase	hypothetical protein [Piscirickettsia salmonis]_x0001_gb|KGP96945.1| alanine dehydrogenase [Piscirickettsia salmonis]	E
A0A0J1J9R8	dsbG	DsbG	-5.09703	6.51966	11.6505	Piscirickettsia salmonis LF-89 = ATCC VR-1361.	Bacteria; Proteobacteria; Gammaproteobacteria; Thiotrichales;Piscirickettsiaceae; Piscirickettsia.	1227812	PSLF89_2164	chromosome	thioredoxin	hypothetical protein [Piscirickettsia salmonis]_x0001_gb|KGP95282.1| thioredoxin-like domain protein [Piscirickettsia salmonis]	O
U4TLN0	K661_01119	Homogentisate 1,2-dioxygenase family protein	-11.3327	6.59982	6.34921	Piscirickettsia salmonis LF-89 = ATCC VR-1361.	Bacteria; Proteobacteria; Gammaproteobacteria; Thiotrichales;Piscirickettsiaceae; Piscirickettsia.	1227812	PSLF89_2165	chromosome	homogentisate 1,2-dioxygenase	hypothetical protein [Piscirickettsia salmonis]_x0001_gb|KGP95281.1| homogentisate 1,2-dioxygenase family protein [Piscirickettsia salmonis]	Q
U4T8Z2	K661_03025	Single-stranded DNA-binding protein	-4.56977	6.77347	14.1026	Piscirickettsia salmonis LF-89 = ATCC VR-1361.	Bacteria; Proteobacteria; Gammaproteobacteria; Thiotrichales;Piscirickettsiaceae; Piscirickettsia.	1227812	PSLF89_2261	chromosome	single-stranded DNA-binding protein	single-stranded DNA-binding protein [Piscirickettsia salmonis]_x0001_gb|KGP97040.1| single-stranded DNA-binding protein [Piscirickettsia salmonis]	L
U4TJJ6	secA	Protein translocase subunit SecA	-4.51064	7.19299	1.97802	Piscirickettsia salmonis LF-89 = ATCC VR-1361.	Bacteria; Proteobacteria; Gammaproteobacteria; Thiotrichales;Piscirickettsiaceae; Piscirickettsia.	1227812	PSLF89_23	chromosome	preprotein translocase subunit SecA	preprotein translocase subunit SecA [Piscirickettsia salmonis]_x0001_gb|KGP98259.1| preprotein translocase, SecA subunit [Piscirickettsia salmonis]	U	(gi:108799816) secA2 (Mmcs_2850) - SecA DEAD-like protein [Mycobacterium sp. str. MCS]	Secretion system
A0A0J1JE51	ORFNames=AB894_03570, PSLF89_2333	Glycine/betaine ABC transporter substrate-binding protein	-5.57791	5.8848	5.88235	Piscirickettsia salmonis LF-89 = ATCC VR-1361.	Bacteria; Proteobacteria; Gammaproteobacteria; Thiotrichales;Piscirickettsiaceae; Piscirickettsia.	1227812	PSLF89_2333	chromosome	glycine/betaine ABC transporter substrate-binding protein	hypothetical protein [Piscirickettsia salmonis]_x0001_gb|KGP94272.1| substrate binding domain of ABC-type glycine betaine transport system family protein [Piscirickettsia salmonis]	E
A0A0H4REE7	maeB	MaeB	-4.32473	6.53894	7.23514	Piscirickettsia salmonis LF-89 = ATCC VR-1361.	Bacteria; Proteobacteria; Gammaproteobacteria; Thiotrichales;Piscirickettsiaceae; Piscirickettsia.	1227812	PSLF89_234	chromosome	malate dehydrogenase	hypothetical protein [Piscirickettsia salmonis]_x0001_gb|KGP96940.1| malic enzyme, NAD binding domain protein [Piscirickettsia salmonis]	C
U4T9H3	K661_02307	UbiE/COQ5 methyltransferase family protein	-9.68916	7.36972	5.73123	Piscirickettsia salmonis LF-89 = ATCC VR-1361.	Bacteria; Proteobacteria; Gammaproteobacteria; Thiotrichales;Piscirickettsiaceae; Piscirickettsia.	1227812	PSLF89_2379	chromosome	hypothetical protein	ubiE/COQ5 methyltransferase family protein [Piscirickettsia salmonis]	J
A0A0J1JAT9	comL	Outer membrane protein assembly factor BamD	-4.14553	6.07773	8.84615	Piscirickettsia salmonis LF-89 = ATCC VR-1361.	Bacteria; Proteobacteria; Gammaproteobacteria; Thiotrichales;Piscirickettsiaceae; Piscirickettsia.	1227812	PSLF89_2505	chromosome	outer membrane assembly lipoyfio family protein	hypothetical protein [Piscirickettsia salmonis]_x0001_gb|KGP95002.1| outer membrane assembly lipoYfiO family protein [Piscirickettsia salmonis]	M
A0A0J1M4I6	flgD	Basal-body rod modification protein FlgD	-5.13675	6.29163	19.3833	Piscirickettsia salmonis LF-89 = ATCC VR-1361.	Bacteria; Proteobacteria; Gammaproteobacteria; Thiotrichales;Piscirickettsiaceae; Piscirickettsia.	1227812	PSLF89_2556	chromosome	flagellar biosynthesis protein FlgD	flagellar basal body rod modification protein FlgD [Piscirickettsia salmonis]_x0001_gb|KGP95630.1| flagellar basal body rod modification protein FlgD [Piscirickettsia salmonis]	N	(gi:152989628) flgD (PSPA7_4298) - flagellar basal-body rod modification protein FlgD [Pseudomonas aeruginosa str. PA7]	Adhesins, adherence and adhesion-related proteins
A0A0J1M362	nuoD	NADH-quinone oxidoreductase subunit D	-5.73531	6.1241	5.51559	Piscirickettsia salmonis LF-89 = ATCC VR-1361.	Bacteria; Proteobacteria; Gammaproteobacteria; Thiotrichales;Piscirickettsiaceae; Piscirickettsia.	1227812	PSLF89_259	chromosome	NADH dehydrogenase	NADH dehydrogenase subunit D [Piscirickettsia salmonis]_x0001_gb|KGP98426.1| NADH dehydrogenase subunit D [Piscirickettsia salmonis]	C
A0A0J1M371	infB	Translation initiation factor IF-2	-4.28442	6.11749	1.3468	Piscirickettsia salmonis LF-89 = ATCC VR-1361.	Bacteria; Proteobacteria; Gammaproteobacteria; Thiotrichales;Piscirickettsiaceae; Piscirickettsia.	1227812	PSLF89_273	chromosome	translation initiation factor IF-2	translation initiation factor IF-2 [Piscirickettsia salmonis]_x0001_gb|KGP98439.1| translation initiation factor IF-2 [Piscirickettsia salmonis]	M
A0A0J1JD70	ORFNames=AB894_05275, PSLF89_2750	Uncharacterized protein	-5.14317	5.93063	2.40175	Piscirickettsia salmonis LF-89 = ATCC VR-1361.	Bacteria; Proteobacteria; Gammaproteobacteria; Thiotrichales;Piscirickettsiaceae; Piscirickettsia.	1227812	PSLF89_2750	chromosome	hypothetical protein	hypothetical protein [Piscirickettsia salmonis]_x0001_gb|KGP95203.1| glycosyl transferase family 2 [Piscirickettsia salmonis]	No orthologs found
A0A0H4QXV5	pnp	Polyribonucleotide nucleotidyltransferase	-4.52163	6.91957	4.14938	Piscirickettsia salmonis LF-89 = ATCC VR-1361.	Bacteria; Proteobacteria; Gammaproteobacteria; Thiotrichales;Piscirickettsiaceae; Piscirickettsia.	1227812	PSLF89_277	chromosome	polyribonucleotide nucleotidyltransferase	hypothetical protein [Piscirickettsia salmonis]_x0001_gb|KGP98443.1| polyribonucleotide nucleotidyltransferase [Piscirickettsia salmonis]	J
U4TG18	K661_03004	Response regulator	-4.34977	7.26187	9.38511	Piscirickettsia salmonis LF-89 = ATCC VR-1361.	Bacteria; Proteobacteria; Gammaproteobacteria; Thiotrichales;Piscirickettsiaceae; Piscirickettsia.	1227812	PSLF89_2776	chromosome	chemotaxis protein CheW	hypothetical protein [Piscirickettsia salmonis]_x0001_gb|KGP94222.1| response regulator [Piscirickettsia salmonis]	NT	(gi:147674785) cheV (VC0395_A1794) - chemotaxis protein CheV [Vibrio cholerae str. O395 chromosome II]	Chemotaxis
A0A0J1M0K1	ycgB	SpoVR family protein	-5.01035	6.27646	4.29104	Piscirickettsia salmonis LF-89 = ATCC VR-1361.	Bacteria; Proteobacteria; Gammaproteobacteria; Thiotrichales;Piscirickettsiaceae; Piscirickettsia.	1227812	PSLF89_2810	chromosome	SpoVR family protein	hypothetical protein [Piscirickettsia salmonis]_x0001_gb|KGP97741.1| spoVR like family protein [Piscirickettsia salmonis]	D
U4TKR0	astB	N-succinylarginine dihydrolase	-5.64924	6.22781	5.17241	Piscirickettsia salmonis LF-89 = ATCC VR-1361.	Bacteria; Proteobacteria; Gammaproteobacteria; Thiotrichales;Piscirickettsiaceae; Piscirickettsia.	1227812	PSLF89_2839	chromosome	succinylarginine dihydrolase	hypothetical protein [Piscirickettsia salmonis]_x0001_gb|KGP95506.1| succinylarginine dihydrolase [Piscirickettsia salmonis]	E
A0A0H4RK67	gmk	Guanylate kinase	-4.07838	7.16274	8.25243	Piscirickettsia salmonis LF-89 = ATCC VR-1361.	Bacteria; Proteobacteria; Gammaproteobacteria; Thiotrichales;Piscirickettsiaceae; Piscirickettsia.	1227812	PSLF89_2847	chromosome	guanylate kinase	guanylate kinase [Piscirickettsia salmonis]_x0001_gb|KGP95499.1| guanylate kinase [Piscirickettsia salmonis]	F
A0A0H4R5M9	yjjK	YjjK	-6.07816	6.08808	5.9034	Piscirickettsia salmonis LF-89 = ATCC VR-1361.	Bacteria; Proteobacteria; Gammaproteobacteria; Thiotrichales;Piscirickettsiaceae; Piscirickettsia.	1227812	PSLF89_2876	chromosome	ABC transporter ATP-binding protein	heme ABC transporter ATP-binding protein [Piscirickettsia salmonis]	R	(gi:68535383) hmuV (jk0318) - putative iron ABC transport system, ATP-binding protein [Corynebacterium jeikeium str. K411]	Metal uptake and heme acquisition
A0A0H4R313	caD	Carbamoyl-phosphate synthase (glutamine-hydrolyzing)	-5.32704	6.27286	1.79076	Piscirickettsia salmonis LF-89 = ATCC VR-1361.	Bacteria; Proteobacteria; Gammaproteobacteria; Thiotrichales;Piscirickettsiaceae; Piscirickettsia.	1227812	PSLF89_2913	chromosome	carbamoyl phosphate synthase large subunit	carbamoyl phosphate synthase large subunit [Piscirickettsia salmonis]_x0001_gb|KGP94862.1| carbamoyl phosphate synthase large subunit [Piscirickettsia salmonis]	EF
U4TDK0	K661_02212	Oxidoreductase NAD-binding domain protein	-4.55664	6.75432	6.06061	Piscirickettsia salmonis LF-89 = ATCC VR-1361.	Bacteria; Proteobacteria; Gammaproteobacteria; Thiotrichales;Piscirickettsiaceae; Piscirickettsia.	1227812	PSLF89_2959	chromosome	oxidoreductase	hypothetical protein [Piscirickettsia salmonis]_x0001_gb|KGP95861.1| oxidoreductase NAD-binding domain protein [Piscirickettsia salmonis]	C
A0A0J1M422	purM	Phosphoribosylformylglycinamidine cyclo-ligase	-5.18792	6.54884	8.52273	Piscirickettsia salmonis LF-89 = ATCC VR-1361.	Bacteria; Proteobacteria; Gammaproteobacteria; Thiotrichales;Piscirickettsiaceae; Piscirickettsia.	1227812	PSLF89_2968	chromosome	phosphoribosylaminoimidazole synthetase	phosphoribosylaminoimidazole synthetase [Piscirickettsia salmonis]	F
A0A0J1JEC9	prfA	Peptide chain release factor 1	-4.77225	6.12749	4.70914	Piscirickettsia salmonis LF-89 = ATCC VR-1361.	Bacteria; Proteobacteria; Gammaproteobacteria; Thiotrichales;Piscirickettsiaceae; Piscirickettsia.	1227812	PSLF89_3000	chromosome	peptide chain release factor 1	peptide chain release factor 1 [Piscirickettsia salmonis]_x0001_gb|KGP95326.1| peptide chain release factor 1 [Piscirickettsia salmonis]	J
U4TJV2	engD	Ribosome-binding ATPase YchF	-2.79588	6.40947	1.92837	Piscirickettsia salmonis LF-89 = ATCC VR-1361.	Bacteria; Proteobacteria; Gammaproteobacteria; Thiotrichales;Piscirickettsiaceae; Piscirickettsia.	1227812	PSLF89_3007	chromosome	GTP-binding protein	GTP-binding protein YchF [Piscirickettsia salmonis]_x0001_gb|KGP95333.1| GTP-binding protein YchF [Piscirickettsia salmonis]	J
A0A0H4R3S0	mtn	5'-methylthioadenosine/S-adenosylhomocysteine nucleosidase 2	-4.2989	6.38316	6.75105	Piscirickettsia salmonis LF-89 = ATCC VR-1361.	Bacteria; Proteobacteria; Gammaproteobacteria; Thiotrichales;Piscirickettsiaceae; Piscirickettsia.	1227812	PSLF89_3008	chromosome	nucleosidase	hypothetical protein [Piscirickettsia salmonis]_x0001_gb|KGP95334.1| MTA/SAH nucleosidase [Piscirickettsia salmonis]	F
A0A0H4R387	PSLF89_3032	Alpha-L-glycero-D-manno-heptose beta-1,4-glucosyltransferase	-4.36568	6.55316	9.65251	Piscirickettsia salmonis LF-89 = ATCC VR-1361.	Bacteria; Proteobacteria; Gammaproteobacteria; Thiotrichales;Piscirickettsiaceae; Piscirickettsia.	1227812	PSLF89_3032	chromosome	alpha-L-glycero-D-manno-heptose beta-1,4-glucosyltransferase	alpha-L-glycero-D-manno-heptose beta-1,4-glucosyltransferase [Piscirickettsia salmonis]	M	(gi:157415395) C8J_1075 - hypothetical protein [Campylobacter jejuni str. 81116 (NCTC11828)]	Host immune evasion, molecular mimicry
A0A0H4R3W4	phbC	PhbC	-6.25774	6.85864	6.07553	Piscirickettsia salmonis LF-89 = ATCC VR-1361.	Bacteria; Proteobacteria; Gammaproteobacteria; Thiotrichales;Piscirickettsiaceae; Piscirickettsia.	1227812	PSLF89_3075	chromosome	poly(3-hydroxyalkanoate) synthetase	hypothetical protein [Piscirickettsia salmonis]	I
U4TP77	ORFNames=AB894_14065, K661_00287	Uncharacterized protein	-15.0225	7.85512	16.3743	Piscirickettsia salmonis LF-89 = ATCC VR-1361.	Bacteria; Proteobacteria; Gammaproteobacteria; Thiotrichales;Piscirickettsiaceae; Piscirickettsia.	1227812	PSLF89_3102	chromosome	hypothetical protein	hypothetical protein [Piscirickettsia salmonis]_x0001_gb|ERL63337.1| hypothetical protein K661_00287 [Piscirickettsia salmonis LF-89= ATCC VR-1361]_x0001_gb|KGP94800.1| hypothetical protein KU39_02927 [Piscirickettsia salmonis]_x0001_gb|KGP96816.1| hypothetical protein KW89_02485 [Piscirickettsia salmonis]	No orthologs found
U4TGT8	K661_00291	Uncharacterized protein	-4.47341	5.9239	7.15789	Piscirickettsia salmonis LF-89 = ATCC VR-1361.	Bacteria; Proteobacteria; Gammaproteobacteria; Thiotrichales;Piscirickettsiaceae; Piscirickettsia.	1227812	PSLF89_3106	chromosome	type VI secretion protein	type VI secretion protein [Piscirickettsia salmonis]	U	(gi:229593385) PFLU6020 - hypothetical protein [Pseudomonas fluorescens str. SBW25]	Secretion system
U4TJ07	K661_00292	Uncharacterized protein	-7.58392	6.55889	7.40741	Piscirickettsia salmonis LF-89 = ATCC VR-1361.	Bacteria; Proteobacteria; Gammaproteobacteria; Thiotrichales;Piscirickettsiaceae; Piscirickettsia.	1227812	PSLF89_3107	chromosome	type VI secretion protein	type VI secretion protein [Piscirickettsia salmonis]_x0001_gb|KGP94795.1| type VI secretion protein [Piscirickettsia salmonis]	U		Secretion system
U4TME3	K661_00871	TrfA family protein	-5.91388	6.55546	7.03704	Piscirickettsia salmonis LF-89 = ATCC VR-1361.	Bacteria; Proteobacteria; Gammaproteobacteria; Thiotrichales;Piscirickettsiaceae; Piscirickettsia.	1227812	PSLF89_3161	chromosome	trfA family protein	trfA family protein [Piscirickettsia salmonis]	No orthologs found
U4TDG2	metQ	Lipoprotein	-4.67722	5.86563	15.1079	Piscirickettsia salmonis LF-89 = ATCC VR-1361.	Bacteria; Proteobacteria; Gammaproteobacteria; Thiotrichales;Piscirickettsiaceae; Piscirickettsia.	1227812	PSLF89_3162	chromosome	D-methionine-binding lipoprotein metQ	D-methionine-binding lipoprotein metQ [Piscirickettsia salmonis]	P
U4TLE7	K661_00866	Exonuclease family protein	-4.46795	7.14708	6.30252	Piscirickettsia salmonis LF-89 = ATCC VR-1361.	Bacteria; Proteobacteria; Gammaproteobacteria; Thiotrichales;Piscirickettsiaceae; Piscirickettsia.	1227812	PSLF89_3165	chromosome	exonuclease	exonuclease [Piscirickettsia salmonis]	L
U4TKM8	dnaK	Chaperone protein DnaK	-4.07166	6.24707	3.72671	Piscirickettsia salmonis LF-89 = ATCC VR-1361.	Bacteria; Proteobacteria; Gammaproteobacteria; Thiotrichales;Piscirickettsiaceae; Piscirickettsia.	1227812	PSLF89_321	chromosome	molecular chaperone DnaK	chaperone protein DnaK [Piscirickettsia salmonis]_x0001_gb|KGP98484.1| molecular chaperone DnaK [Piscirickettsia salmonis]	O
A0A0H4R3L1	purU	Formyltetrahydrofolate deformylase	-4.21534	6.17152	13.6054	Piscirickettsia salmonis LF-89 = ATCC VR-1361.	Bacteria; Proteobacteria; Gammaproteobacteria; Thiotrichales;Piscirickettsiaceae; Piscirickettsia.	1227812	PSLF89_3222	chromosome	formyltetrahydrofolate deformylase	formyltetrahydrofolate deformylase [Piscirickettsia salmonis]	F
U4TGI5	K661_00354	Uroporphyrinogen-III synthase HemD family protein	-4.67216	6.85286	7.22433	Piscirickettsia salmonis LF-89 = ATCC VR-1361.	Bacteria; Proteobacteria; Gammaproteobacteria; Thiotrichales;Piscirickettsiaceae; Piscirickettsia.	1227812	PSLF89_3268	chromosome	uroporphyrinogen-III synthase HemD	hypothetical protein [Piscirickettsia salmonis]_x0001_gb|KGP98157.1| uroporphyrinogen-III synthase HemD family protein [Piscirickettsia salmonis]	H	(gi:113460194) hemD (HS_0045) - uroporphyrinogen-III synthase [Haemophilus somnus str. 129PT]	Metal uptake and heme acquisition
U4TJJ3	rdgB	Non-canonical purine NTP pyrophosphatase	-4.34405	7.1543	13.9303	Piscirickettsia salmonis LF-89 = ATCC VR-1361.	Bacteria; Proteobacteria; Gammaproteobacteria; Thiotrichales;Piscirickettsiaceae; Piscirickettsia.	1227812	PSLF89_3321	chromosome	non-canonical purine NTP pyrophosphatase	hypothetical protein [Piscirickettsia salmonis]_x0001_gb|KGP96477.1| non-canonical purine NTP pyrophosphatase, RdgB/HAM1 family [Piscirickettsia salmonis]	F	(gi:148827416) orfM (CGSHiGG_04080) - putative deoxyribonucleotide triphosphate pyrophosphatase [Haemophilus influenzae str. PittGG (nontypeable)]	Endotoxin
U4TDQ9	K661_02132	Sugar (And other) transporter family protein	-4.12523	6.83211	5.48523	Piscirickettsia salmonis LF-89 = ATCC VR-1361.	Bacteria; Proteobacteria; Gammaproteobacteria; Thiotrichales;Piscirickettsiaceae; Piscirickettsia.	1227812	PSLF89_3356	chromosome	sugar (and other) transporter family protein	sugar (and other) transporter family protein [Piscirickettsia salmonis]	G
U4TPP3	glmS	Glutamine--fructose-6-phosphate aminotransferase [isomerizing]	-5.86632	6.01527	3.10966	Piscirickettsia salmonis LF-89 = ATCC VR-1361.	Bacteria; Proteobacteria; Gammaproteobacteria; Thiotrichales;Piscirickettsiaceae; Piscirickettsia.	1227812	PSLF89_3377	chromosome	glutamine--fructose-6-phosphate aminotransferase	glucosamine--fructose-6-phosphate aminotransferase [Piscirickettsia salmonis]_x0001_gb|AGG17600.1| glucosamine-fructose-6-phosphate transaminase [Piscirickettsia salmonis]_x0001_gb|KGP98217.1| glucosamine--fructose-6-phosphate aminotransferase [Piscirickettsia salmonis]	M
U4TGT7	K661_02768	CobQ/CobB/MinD/ParA nucleotide binding domain protein	-4.07089	5.92572	6.48968	Piscirickettsia salmonis LF-89 = ATCC VR-1361.	Bacteria; Proteobacteria; Gammaproteobacteria; Thiotrichales;Piscirickettsiaceae; Piscirickettsia.	1227812	PSLF89_3388	chromosome	chromosome partitioning protein	hypothetical protein [Piscirickettsia salmonis]_x0001_gb|KGP98229.1| cobQ/CobB/MinD/ParA nucleotide binding domain protein [Piscirickettsia salmonis]	D
U4TI81	rplL	50S ribosomal protein L7/L12	-15.6199	7.04232	23.7705	Piscirickettsia salmonis LF-89 = ATCC VR-1361.	Bacteria; Proteobacteria; Gammaproteobacteria; Thiotrichales;Piscirickettsiaceae; Piscirickettsia.	1227812	PSLF89_342	chromosome	50S ribosomal protein L7/L12	50S ribosomal protein L7/L12 [Piscirickettsia salmonis]_x0001_gb|KGP96683.1| 50S ribosomal protein L7/L12 [Piscirickettsia salmonis]	J
A0A0J1JEK5	rplC	50S ribosomal protein L3	-9.52745	6.54628	7.07547	Piscirickettsia salmonis LF-89 = ATCC VR-1361.	Bacteria; Proteobacteria; Gammaproteobacteria; Thiotrichales;Piscirickettsiaceae; Piscirickettsia.	1227812	PSLF89_350	chromosome	50S ribosomal protein L3	50S ribosomal protein L3 [Piscirickettsia salmonis]_x0001_gb|KGP96675.1| 50S ribosomal protein L3 [Piscirickettsia salmonis]	J
U4TIA5	rplE	50S ribosomal protein L5	-4.09642	6.41802	11.1111	Piscirickettsia salmonis LF-89 = ATCC VR-1361.	Bacteria; Proteobacteria; Gammaproteobacteria; Thiotrichales;Piscirickettsiaceae; Piscirickettsia.	1227812	PSLF89_359	chromosome	50S ribosomal protein L5	50S ribosomal protein L5 [Piscirickettsia salmonis]_x0001_gb|ERL63125.1| 50S ribosomal protein L5 [Piscirickettsia salmonis LF-89 = ATCC VR-1361]_x0001_gb|KGP96663.1| 50S ribosomal protein L5 [Piscirickettsia salmonis]_x0001_gb|KGP99355.1| 50S ribosomal protein L5 [Piscirickettsia salmonis]	J
U4THJ9	K661_02217	Uncharacterized protein	-4.24167	6.96705	7.26644	Piscirickettsia salmonis LF-89 = ATCC VR-1361.	Bacteria; Proteobacteria; Gammaproteobacteria; Thiotrichales;Piscirickettsiaceae; Piscirickettsia.	1227812	PSLF89_3p26	pPSLF89-3	hypothetical protein	hypothetical protein [Piscirickettsia salmonis]	No orthologs found
A0A0J1J7P2	ORFNames=AB894_15200, PSLF89_3p54	Uncharacterized protein	-4.16732	6.5217	5.74713	Piscirickettsia salmonis LF-89 = ATCC VR-1361.	Bacteria; Proteobacteria; Gammaproteobacteria; Thiotrichales;Piscirickettsiaceae; Piscirickettsia.	1227812	PSLF89_3p54	pPSLF89-3	hypothetical protein	hypothetical protein [Piscirickettsia salmonis]_x0001_gb|KGP95814.1| molybdopterin biosynthesis protein MoeB [Piscirickettsia salmonis]_x0001_gb|KGP98680.1| molybdopterin biosynthesis protein MoeB [Piscirickettsia salmonis]	No orthologs found
U4TKJ5	mltB	Lytic murein transglycosylase B	-9.76842	6.41146	5.38244	Piscirickettsia salmonis LF-89 = ATCC VR-1361.	Bacteria; Proteobacteria; Gammaproteobacteria; Thiotrichales;Piscirickettsiaceae; Piscirickettsia.	1227812	PSLF89_414	chromosome	lytic murein transglycosylase	hypothetical protein [Piscirickettsia salmonis]	M	(gi:66047584) hopAJ2 (Psyr_4357) - type III effector HopAJ2 [Pseudomonas syringae str. B728a (pv. syringae)]	Toxin, efector protein
A0A0J1JBT9	nrdA	Ribonucleoside-diphosphate reductase	-4.83134	8.05881	2.46781	Piscirickettsia salmonis LF-89 = ATCC VR-1361.	Bacteria; Proteobacteria; Gammaproteobacteria; Thiotrichales;Piscirickettsiaceae; Piscirickettsia.	1227812	PSLF89_451	chromosome	ribonucleotide-diphosphate reductase subunit alpha	hypothetical protein [Piscirickettsia salmonis]_x0001_gb|KGP96071.1| ribonucleoside-diphosphate reductase, alpha subunit [Piscirickettsia salmonis]	F
U4TFP8	ppc	Phosphoenolpyruvate carboxylase	-12.3489	7.56287	1.60256	Piscirickettsia salmonis LF-89 = ATCC VR-1361.	Bacteria; Proteobacteria; Gammaproteobacteria; Thiotrichales;Piscirickettsiaceae; Piscirickettsia.	1227812	PSLF89_462	chromosome	phosphoenolpyruvate carboxylase	hypothetical protein [Piscirickettsia salmonis]_x0001_gb|KGP95947.1| phosphoenolpyruvate carboxylase [Piscirickettsia salmonis]	C
A0A0H4QYA8	rfaE	Bifunctional protein HldE	-4.93711	7.54598	8.01688	Piscirickettsia salmonis LF-89 = ATCC VR-1361.	Bacteria; Proteobacteria; Gammaproteobacteria; Thiotrichales;Piscirickettsiaceae; Piscirickettsia.	1227812	PSLF89_470	chromosome	bifunctional heptose 7-phosphate kinase/heptose 1-phosphate adenyltransferase	nucleotidyltransferase [Piscirickettsia salmonis]_x0001_gb|KGP95941.1| nucleotidyltransferase [Piscirickettsia salmonis]	M	(gi:113460721) rfaE (HS_0576) - ADP-heptose synthase [Haemophilus somnus str. 129PT]	Endotoxin
U4TCK8	K661_01748	Uncharacterized protein	-14.5296	8.51544	7.37327	Piscirickettsia salmonis LF-89 = ATCC VR-1361.	Bacteria; Proteobacteria; Gammaproteobacteria; Thiotrichales;Piscirickettsiaceae; Piscirickettsia.	1227812	PSLF89_556	chromosome	hypothetical protein	hypothetical protein [Piscirickettsia salmonis]_x0001_gb|KGP95479.1| phosphate transport regulator [Piscirickettsia salmonis]	S
A0A0J1JC56	acnA	Aconitate hydratase	-5.23543	6.81427	2.45536	Piscirickettsia salmonis LF-89 = ATCC VR-1361.	Bacteria; Proteobacteria; Gammaproteobacteria; Thiotrichales;Piscirickettsiaceae; Piscirickettsia.	1227812	PSLF89_601	chromosome	aconitate hydratase	hypothetical protein [Piscirickettsia salmonis]_x0001_gb|KGP96988.1| aconitate hydratase 1 [Piscirickettsia salmonis]	C
U4TG91	K661_00466	Endonuclease/Exonuclease/phosphatase family protein	-5.24834	5.99386	4.35685	Piscirickettsia salmonis LF-89 = ATCC VR-1361.	Bacteria; Proteobacteria; Gammaproteobacteria; Thiotrichales;Piscirickettsiaceae; Piscirickettsia.	1227812	PSLF89_629	chromosome	nuclease	hypothetical protein [Piscirickettsia salmonis]_x0001_gb|KGP97018.1| endonuclease/Exonuclease/phosphatase family protein [Piscirickettsia salmonis]	No orthologs found
A0A0J1JC38	ORFNames=AB894_07120, PSLF89_630	Uncharacterized protein	-4.91976	7.80069	8.14815	Piscirickettsia salmonis LF-89 = ATCC VR-1361.	Bacteria; Proteobacteria; Gammaproteobacteria; Thiotrichales;Piscirickettsiaceae; Piscirickettsia.	1227812	PSLF89_630	chromosome	hypothetical protein	hypothetical protein [Piscirickettsia salmonis]_x0001_gb|KGP97019.1| hypothetical protein KU39_01311 [Piscirickettsia salmonis]	No orthologs found
U4TCR0	topA	DNA topoisomerase 1	-4.24267	6.86885	3.35121	Piscirickettsia salmonis LF-89 = ATCC VR-1361.	Bacteria; Proteobacteria; Gammaproteobacteria; Thiotrichales;Piscirickettsiaceae; Piscirickettsia.	1227812	PSLF89_65	chromosome	DNA topoisomerase I	DNA topoisomerase I [Piscirickettsia salmonis]_x0001_gb|KGP95712.1| DNA topoisomerase I [Piscirickettsia salmonis]	L
A0A0J1M4E2	deoD	Purine nucleoside phosphorylase DeoD-type	-24.3942	7.48609	20.9402	Piscirickettsia salmonis LF-89 = ATCC VR-1361.	Bacteria; Proteobacteria; Gammaproteobacteria; Thiotrichales;Piscirickettsiaceae; Piscirickettsia.	1227812	PSLF89_670	chromosome	purine nucleoside phosphorylase DeoD-type	purine nucleoside phosphorylase DeoD-type [Piscirickettsia salmonis]_x0001_gb|KGP96405.1| purine nucleoside phosphorylase DeoD-type [Piscirickettsia salmonis]	F
A0A0H4QYH1	arnC	ArnC	-4.65034	6.22669	6.56716	Piscirickettsia salmonis LF-89 = ATCC VR-1361.	Bacteria; Proteobacteria; Gammaproteobacteria; Thiotrichales;Piscirickettsiaceae; Piscirickettsia.	1227812	PSLF89_709	chromosome	UDP-4-amino-4-deoxy-L-arabinose-oxoglutarate aminotransferase	hypothetical protein [Piscirickettsia salmonis]_x0001_gb|KGP97286.1| glycosyl transferase 2 family protein [Piscirickettsia salmonis]_x0001_gb|KGP98092.1| glycosyl transferase 2 family protein [Piscirickettsia salmonis]	M	(gi:24111748) gtrB (SF0306) - putative bactoprenol glucosyl transferase [Shigella flexneri str. 301 (serotype 2a)]	Host immune evasion, molecular mimicry
A0A0J1JC61	oppF	OppF	-5.8207	6.05173	4.92308	Piscirickettsia salmonis LF-89 = ATCC VR-1361.	Bacteria; Proteobacteria; Gammaproteobacteria; Thiotrichales;Piscirickettsiaceae; Piscirickettsia.	1227812	PSLF89_719	chromosome	peptide ABC transporter ATP-binding protein	hypothetical protein [Piscirickettsia salmonis]_x0001_gb|KGP97296.1| oligopeptide/dipeptide ABC transporter, ATP-binding , C-terminal domain protein [Piscirickettsia salmonis]	E	(gi:42561491) oppF (MSC_0975) - oligopeptide ABC transporter, permease component [Mycoplasma mycoides str. PG1]	Antiphagocytosis, capsule
U4TFN7	K661_01424	ThiF family protein	-5.77372	6.26085	10.6996	Piscirickettsia salmonis LF-89 = ATCC VR-1361.	Bacteria; Proteobacteria; Gammaproteobacteria; Thiotrichales;Piscirickettsiaceae; Piscirickettsia.	1227812	PSLF89_761	chromosome	tRNA threonylcarbamoyladenosine dehydratase	hypothetical protein [Piscirickettsia salmonis]_x0001_gb|KGP94531.1| thiF family protein [Piscirickettsia salmonis]	J
U4TA41	K661_02049	Uncharacterized protein	-4.88894	6.15756	10	Piscirickettsia salmonis LF-89 = ATCC VR-1361.	Bacteria; Proteobacteria; Gammaproteobacteria; Thiotrichales;Piscirickettsiaceae; Piscirickettsia.	1227812	PSLF89_78	chromosome	hypothetical protein	hypothetical protein [Piscirickettsia salmonis]_x0001_gb|KGP95700.1| hypothetical protein KU39_02266 [Piscirickettsia salmonis]	No orthologs found
U4T9L2	K661_02829	Uncharacterized protein	-6.6127	6.9567	2.60771	Piscirickettsia salmonis LF-89 = ATCC VR-1361.	Bacteria; Proteobacteria; Gammaproteobacteria; Thiotrichales;Piscirickettsiaceae; Piscirickettsia.	1227812	PSLF89_849	chromosome	hypothetical protein	hypothetical protein KU39_01758 [Piscirickettsia salmonis]	No orthologs found
A0A0J1JAP6	AB894_09985	Methyltransferase	-4.01023	5.67438	5.01089	Piscirickettsia salmonis LF-89 = ATCC VR-1361.	Bacteria; Proteobacteria; Gammaproteobacteria; Thiotrichales;Piscirickettsiaceae; Piscirickettsia.	1227812	PSLF89_858	chromosome	methyltransferase	hypothetical protein [Piscirickettsia salmonis]	R
U4THI0	K661_02233	Lipase family protein	-5.66929	7.10003	5.40541	Piscirickettsia salmonis LF-89 = ATCC VR-1361.	Bacteria; Proteobacteria; Gammaproteobacteria; Thiotrichales;Piscirickettsiaceae; Piscirickettsia.	1227812	PSLF89_871	chromosome	alpha/beta hydrolase	hypothetical protein [Piscirickettsia salmonis]_x0001_gb|KGP96854.1| alpha/beta hydrolase fold family protein [Piscirickettsia salmonis]	I	(gi:152983967) pvdJ (PSPA7_2860) - thermophilic carboxylesterase Est2 [Pseudomonas aeruginosa str. PA7]	Metal uptake and heme acquisition
A0A0H4RFX5	glk	Glk	-4.77571	6.06273	6.30631	Piscirickettsia salmonis LF-89 = ATCC VR-1361.	Bacteria; Proteobacteria; Gammaproteobacteria; Thiotrichales;Piscirickettsiaceae; Piscirickettsia.	1227812	PSLF89_879	chromosome	glucokinase	hypothetical protein [Piscirickettsia salmonis]_x0001_gb|KGP96846.1| glucokinase [Piscirickettsia salmonis]	G
U4TD38	sdhA	Succinate dehydrogenase flavoprotein subunit	-4.15824	6.3299	4.17391	Piscirickettsia salmonis LF-89 = ATCC VR-1361.	Bacteria; Proteobacteria; Gammaproteobacteria; Thiotrichales;Piscirickettsiaceae; Piscirickettsia.	1227812	PSLF89_896	chromosome	succinate dehydrogenase	hypothetical protein [Piscirickettsia salmonis]_x0001_gb|KGP96829.1| succinate dehydrogenase, flavoprotein subunit [Piscirickettsia salmonis]	C
A0A0H4RFZ0	sucB	Dihydrolipoamide succinyltransferase	-4.15993	6.65094	6.5445	Piscirickettsia salmonis LF-89 = ATCC VR-1361.	Bacteria; Proteobacteria; Gammaproteobacteria; Thiotrichales;Piscirickettsiaceae; Piscirickettsia.	1227812	PSLF89_899	chromosome	dihydrolipoamide succinyltransferase	hypothetical protein [Piscirickettsia salmonis]_x0001_gb|KGP96826.1| dihydrolipoyllysine-residue succinyltransferase, E2 component of oxoglutarate dehydrogenase [Piscirickettsia salmonis]	C
U4TL22	K661_00989	Ras family protein	-4.06766	6.36325	5.76923	Piscirickettsia salmonis LF-89 = ATCC VR-1361.	Bacteria; Proteobacteria; Gammaproteobacteria; Thiotrichales;Piscirickettsiaceae; Piscirickettsia.	1227812	PSLF89_906	chromosome	ras family protein	hypothetical protein [Piscirickettsia salmonis]_x0001_gb|KGP96013.1| ras family protein [Piscirickettsia salmonis]	No orthologs found
U4TD21	mviN	Putative lipid II flippase MurJ	-4.03505	5.9392	7.61719	Piscirickettsia salmonis LF-89 = ATCC VR-1361.	Bacteria; Proteobacteria; Gammaproteobacteria; Thiotrichales;Piscirickettsiaceae; Piscirickettsia.	1227812	PSLF89_985	chromosome	murein biosynthesis protein MurJ	hypothetical protein [Piscirickettsia salmonis]_x0001_gb|KGP95597.1| integral membrane protein MviN [Piscirickettsia salmonis]	M

## Sheet: P.sal propagation
Protein Name	gene name	description	E-value	Intensity	Coverage (%)	up_os	up_oc	ncbi_taxid	locus tag	Type	Description GenBank	nr description	COG letter	VFDB desc	VF family
A0A0J1JDV3	AB894_03775	Uncharacterized protein	-4.80376	6.19028	24.3243	Piscirickettsia salmonis LF-89 = ATCC VR-1361.	Bacteria; Proteobacteria; Gammaproteobacteria; Thiotrichales;Piscirickettsiaceae; Piscirickettsia.	1227812	PSLF89_03765	chromosome	hypothetical protein	hypothetical protein [Piscirickettsia salmonis]_x0001_gb|KGP94523.1| hypothetical protein KU39_03114 [Piscirickettsia salmonis]	No orthologs found
A0A0J1M1E0	AB894_09150	Uncharacterized protein	-5.27485	7.31005	13.4969	Piscirickettsia salmonis LF-89 = ATCC VR-1361.	Bacteria; Proteobacteria; Gammaproteobacteria; Thiotrichales;Piscirickettsiaceae; Piscirickettsia.	1227812	PSLF89_03820	chromosome	hypothetical protein	hypothetical protein [Piscirickettsia salmonis]_x0001_gb|KGP95312.1| ATP-dependent exoDNAse (exonuclease V) beta subunit [Piscirickettsia salmonis]	No orthologs found
U4TFD1	mvaD	Diphosphomevalonate decarboxylase	-4.19737	6.90916	5.26316	Piscirickettsia salmonis LF-89 = ATCC VR-1361.	Bacteria; Proteobacteria; Gammaproteobacteria; Thiotrichales;Piscirickettsiaceae; Piscirickettsia.	1227812	PSLF89_04480	chromosome	diphosphomevalonate decarboxylase	hypothetical protein [Piscirickettsia salmonis]_x0001_gb|KGP97688.1| diphosphomevalonate decarboxylase [Piscirickettsia salmonis]	I
A0A0H4RGS2	PSLF89_1250	Mevalonate kinase	-4.01857	6.81876	5.12445	Piscirickettsia salmonis LF-89 = ATCC VR-1361.	Bacteria; Proteobacteria; Gammaproteobacteria; Thiotrichales;Piscirickettsiaceae; Piscirickettsia.	1227812	PSLF89_04485	chromosome	hypothetical protein	hypothetical protein, partial [Piscirickettsia salmonis]	I
A0A0H4QXC2	PSLF89_91	Uncharacterized protein	-4.555	7.1299	59.0909	Piscirickettsia salmonis LF-89 = ATCC VR-1361.	Bacteria; Proteobacteria; Gammaproteobacteria; Thiotrichales;Piscirickettsiaceae; Piscirickettsia.	1227812	PSLF89_04815	chromosome	hypothetical protein	transposase domain protein [Piscirickettsia salmonis]	X
U4THB2	hisE	Phosphoribosyl-ATP diphosphatase	-4.4519	6.43951	4.42804	Piscirickettsia salmonis LF-89 = ATCC VR-1361.	Bacteria; Proteobacteria; Gammaproteobacteria; Thiotrichales;Piscirickettsiaceae; Piscirickettsia.	1227812	PSLF89_04970	chromosome	hypothetical protein	hypothetical protein [Piscirickettsia salmonis]_x0001_gb|KGP96420.1| phosphoribosyl-ATP diphosphatase [Piscirickettsia salmonis]	R
A0A0J1JF88	AB894_01220	Uncharacterized protein	-4.77843	6.65957	5.39683	Piscirickettsia salmonis LF-89 = ATCC VR-1361.	Bacteria; Proteobacteria; Gammaproteobacteria; Thiotrichales;Piscirickettsiaceae; Piscirickettsia.	1227812	PSLF89_05140	chromosome	hypothetical protein	hypothetical protein [Piscirickettsia salmonis]	M
U4TH85	mnmE	tRNA modification GTPase MnmE	-4.74411	6.3032	4.79303	Piscirickettsia salmonis LF-89 = ATCC VR-1361.	Bacteria; Proteobacteria; Gammaproteobacteria; Thiotrichales;Piscirickettsiaceae; Piscirickettsia.	1227812	PSLF89_05750	chromosome	hypothetical protein	hypothetical protein [Piscirickettsia salmonis]_x0001_gb|KGP95277.1| hypothetical protein KU39_02569 [Piscirickettsia salmonis]	No orthologs found
U4T7R7	K661_02945	Transposase zinc-binding domain protein	-4.82357	6.06933	35.443	Piscirickettsia salmonis LF-89 = ATCC VR-1361.	Bacteria; Proteobacteria; Gammaproteobacteria; Thiotrichales;Piscirickettsiaceae; Piscirickettsia.	1227812	PSLF89_05795	chromosome	hypothetical protein	transposase [Piscirickettsia salmonis]_x0001_gb|KGP97859.1| transposase [Piscirickettsia salmonis]	X
A0A0J1M5N9	AB894_00680	Uncharacterized protein	-4.16452	7.88952	40.2597	Piscirickettsia salmonis LF-89 = ATCC VR-1361.	Bacteria; Proteobacteria; Gammaproteobacteria; Thiotrichales;Piscirickettsiaceae; Piscirickettsia.	1227812	PSLF89_05820	chromosome	hypothetical protein	uncharacterized protein KU39_03642 [Piscirickettsia salmonis]	No orthologs found
U4TFV8	K661_03067	Integrase core domain protein	-6.57512	8.70016	15.2	Piscirickettsia salmonis LF-89 = ATCC VR-1361.	Bacteria; Proteobacteria; Gammaproteobacteria; Thiotrichales;Piscirickettsiaceae; Piscirickettsia.	1227812	PSLF89_06000	chromosome	transposase	transposase, partial [Piscirickettsia salmonis]	X	(gi:82524546) ipaH2.5 (SDY_P140) - invasion plasmid antigen, fragment [Shigella dysenteriae str. 197 (serotype 1) plasmid pSD1_197]	Toxin, efector protein
A0A0H4R273	PSLF89_3045	Uncharacterized protein	-10.242	6.98845	41.5385	Piscirickettsia salmonis LF-89 = ATCC VR-1361.	Bacteria; Proteobacteria; Gammaproteobacteria; Thiotrichales;Piscirickettsiaceae; Piscirickettsia.	1227812	PSLF89_06010	chromosome	hypothetical protein	hypothetical protein [Piscirickettsia salmonis]_x0001_gb|KGP95654.1| putative integrase [Piscirickettsia salmonis]_x0001_gb|KGP95819.1| putative integrase [Piscirickettsia salmonis]_x0001_gb|KGP96984.1| putative integrase [Piscirickettsia salmonis]	X
U4TF98	K661_03292	Ribosomal subunit interface protein	-4.27318	6.42369	19.0909	Piscirickettsia salmonis LF-89 = ATCC VR-1361.	Bacteria; Proteobacteria; Gammaproteobacteria; Thiotrichales;Piscirickettsiaceae; Piscirickettsia.	1227812	PSLF89_06220	chromosome	ribosomal subunit interface protein	hypothetical protein [Piscirickettsia salmonis]	J
A0A0J1JFG6	AB894_01265	Uncharacterized protein	-11.9346	6.52806	28.5714	Piscirickettsia salmonis LF-89 = ATCC VR-1361.	Bacteria; Proteobacteria; Gammaproteobacteria; Thiotrichales;Piscirickettsiaceae; Piscirickettsia.	1227812	PSLF89_06265	chromosome	hypothetical protein	hypothetical protein [Piscirickettsia salmonis]_x0001_gb|KGP94414.1| integrase [Piscirickettsia salmonis]	X
A0A0H4R4Y4	PSLF89_2574	Uncharacterized protein	-6.45895	6.57177	69.7674	Piscirickettsia salmonis LF-89 = ATCC VR-1361.	Bacteria; Proteobacteria; Gammaproteobacteria; Thiotrichales;Piscirickettsiaceae; Piscirickettsia.	1227812	PSLF89_06400	chromosome	hypothetical protein	hypothetical protein [Piscirickettsia salmonis]_x0001_gb|KGP94980.1| phosphinothricin acetyltransferase [Piscirickettsia salmonis]	No orthologs found
A0A0J1J8W7	AB894_13125	Uncharacterized protein	-4.05605	6.26195	28.7671	Piscirickettsia salmonis LF-89 = ATCC VR-1361.	Bacteria; Proteobacteria; Gammaproteobacteria; Thiotrichales;Piscirickettsiaceae; Piscirickettsia.	1227812	PSLF89_06445	chromosome	hypothetical protein	hypothetical protein [Piscirickettsia salmonis]_x0001_gb|KGP98563.1| hypothetical protein KU39_00041 [Piscirickettsia salmonis]	No orthologs found
A0A0J1JF94	AB894_01535	Transposase	-5.18217	6.45436	9.77778	Piscirickettsia salmonis LF-89 = ATCC VR-1361.	Bacteria; Proteobacteria; Gammaproteobacteria; Thiotrichales;Piscirickettsiaceae; Piscirickettsia.	1227812	PSLF89_06540	chromosome	transposase	transposase, partial [Piscirickettsia salmonis]	X
A0A0J1J7Z2	ORFNames=AB894_14805, AB894_14920	Lipoprotein	-5.02648	6.10731	21.7054	Piscirickettsia salmonis LF-89 = ATCC VR-1361.	Bacteria; Proteobacteria; Gammaproteobacteria; Thiotrichales;Piscirickettsiaceae; Piscirickettsia.	1227812	PSLF89_06580	chromosome	hypothetical protein	hypothetical protein [Piscirickettsia salmonis]_x0001_gb|KGP94700.1| putative lipoprotein [Piscirickettsia salmonis]	No orthologs found
A0A0H4R1M7	ORFNames=PSLF89_1087, PSLF89_836	Uncharacterized protein	-6.72247	6.20192	34.1176	Piscirickettsia salmonis LF-89 = ATCC VR-1361.	Bacteria; Proteobacteria; Gammaproteobacteria; Thiotrichales;Piscirickettsiaceae; Piscirickettsia.	1227812	PSLF89_07040	chromosome	hypothetical protein	hypothetical protein [Piscirickettsia salmonis]_x0001_gb|KGP95682.1| transposase domain protein [Piscirickettsia salmonis]	X
A0A0J1JEU9	AB894_02275	Uncharacterized protein	-4.55758	6.06265	7.73196	Piscirickettsia salmonis LF-89 = ATCC VR-1361.	Bacteria; Proteobacteria; Gammaproteobacteria; Thiotrichales;Piscirickettsiaceae; Piscirickettsia.	1227812	PSLF89_07170	chromosome	hypothetical protein	hypothetical protein [Piscirickettsia salmonis]_x0001_gb|KGP93945.1| transposase [Piscirickettsia salmonis]	X
A0A0H4R0J3	PSLF89_622	Uncharacterized protein	-4.08334	6.51042	40	Piscirickettsia salmonis LF-89 = ATCC VR-1361.	Bacteria; Proteobacteria; Gammaproteobacteria; Thiotrichales;Piscirickettsiaceae; Piscirickettsia.	1227812	PSLF89_07415	chromosome	hypothetical protein	hypothetical protein [Piscirickettsia salmonis]_x0001_gb|KGP97011.1| type IV secretion system protein IcmV [Piscirickettsia salmonis]	U	(gi:54298677) icmV (lpp2741) - intracellular multiplication protein IcmV [Legionella pneumophila str. Paris]	Secretion system
A0A0H4R2P8	PSLF89_1561	Uncharacterized protein	-5.80655	7.10137	60.3774	Piscirickettsia salmonis LF-89 = ATCC VR-1361.	Bacteria; Proteobacteria; Gammaproteobacteria; Thiotrichales;Piscirickettsiaceae; Piscirickettsia.	1227812	PSLF89_07775	chromosome	transposase	transposase [Piscirickettsia salmonis]_x0001_gb|KGP97212.1| transposase [Piscirickettsia salmonis]	X
A0A0H4R6X4	PSLF89_1p5	Uncharacterized protein	-4.26454	6.2819	1.62524	Piscirickettsia salmonis LF-89 = ATCC VR-1361.	Bacteria; Proteobacteria; Gammaproteobacteria; Thiotrichales;Piscirickettsiaceae; Piscirickettsia.	1227812	PSLF89_08050	pPSLF89-1	hypothetical protein	hypothetical protein, partial [Piscirickettsia salmonis]	No orthologs found
A0A0J1J816	AB894_15205	Transposase	-4.38141	7.42431	5	Piscirickettsia salmonis LF-89 = ATCC VR-1361.	Bacteria; Proteobacteria; Gammaproteobacteria; Thiotrichales;Piscirickettsiaceae; Piscirickettsia.	1227812	PSLF89_08895	pPSLF89-3	transposase	transposase [Piscirickettsia salmonis]_x0001_gb|KGP98681.1| transposase [Piscirickettsia salmonis]	X
U4TET1	ORFNames=AB894_06605, K661_00956	Peptidase S24	-4.99939	6.07717	10.5727	Piscirickettsia salmonis LF-89 = ATCC VR-1361.	Bacteria; Proteobacteria; Gammaproteobacteria; Thiotrichales;Piscirickettsiaceae; Piscirickettsia.	1227812	PSLF89_1003	chromosome	peptidase S24	peptidase S24-like family protein [Piscirickettsia salmonis]_x0001_gb|ERL62679.1| peptidase S24-like family protein [Piscirickettsia salmonis LF-89= ATCC VR-1361]	KT
U4TL64	ppa	Inorganic pyrophosphatase	-4.31572	7.38162	11.4943	Piscirickettsia salmonis LF-89 = ATCC VR-1361.	Bacteria; Proteobacteria; Gammaproteobacteria; Thiotrichales;Piscirickettsiaceae; Piscirickettsia.	1227812	PSLF89_1020	chromosome	inorganic pyrophosphatase	inorganic pyrophosphatase [Piscirickettsia salmonis]	CP
A0A0J1JCM1	tkt	Transketolase	-9.8306	6.75725	6.5967	Piscirickettsia salmonis LF-89 = ATCC VR-1361.	Bacteria; Proteobacteria; Gammaproteobacteria; Thiotrichales;Piscirickettsiaceae; Piscirickettsia.	1227812	PSLF89_1024	chromosome	transketolase	hypothetical protein [Piscirickettsia salmonis]_x0001_gb|KGP97591.1| transketolase [Piscirickettsia salmonis]	G
U4TL52	fba	Fructose-bisphosphate aldolase, class II, Calvin cycle subtype	-6.83254	6.88766	2.31884	Piscirickettsia salmonis LF-89 = ATCC VR-1361.	Bacteria; Proteobacteria; Gammaproteobacteria; Thiotrichales;Piscirickettsiaceae; Piscirickettsia.	1227812	PSLF89_1028	chromosome	fructose-1,6-bisphosphate aldolase	fructose-bisphosphate aldolase [Piscirickettsia salmonis]_x0001_gb|KGP97587.1| fructose-bisphosphate aldolase [Piscirickettsia salmonis]	G
U4TID1	K661_00494	Indole-3-glycerol phosphate synthase	-4.42324	6.79358	13.9535	Piscirickettsia salmonis LF-89 = ATCC VR-1361.	Bacteria; Proteobacteria; Gammaproteobacteria; Thiotrichales;Piscirickettsiaceae; Piscirickettsia.	1227812	PSLF89_105	chromosome	indole-3-glycerol phosphate synthase	hypothetical protein [Piscirickettsia salmonis]_x0001_gb|KGP97519.1| indole-3-glycerol phosphate synthase family protein [Piscirickettsia salmonis]	E
U4TIU0	K661_01797	Kinase domain protein	-4.76621	5.76585	1.92572	Piscirickettsia salmonis LF-89 = ATCC VR-1361.	Bacteria; Proteobacteria; Gammaproteobacteria; Thiotrichales;Piscirickettsiaceae; Piscirickettsia.	1227812	PSLF89_1054	chromosome	hypothetical protein	hypothetical protein [Piscirickettsia salmonis]_x0001_gb|KGP95776.1| kinase domain protein [Piscirickettsia salmonis]	No orthologs found
U4TAX6	lysS	Lysine--tRNA ligase	-4.47583	7.65807	8.00781	Piscirickettsia salmonis LF-89 = ATCC VR-1361.	Bacteria; Proteobacteria; Gammaproteobacteria; Thiotrichales;Piscirickettsiaceae; Piscirickettsia.	1227812	PSLF89_1061	chromosome	lysine--tRNA ligase	hypothetical protein [Piscirickettsia salmonis]_x0001_gb|KGP95781.1| lysine--tRNA ligase [Piscirickettsia salmonis]	J
A0A0H4QZL7	PSLF89_1069	Uncharacterized protein	-4.7729	6.59892	4.45205	Piscirickettsia salmonis LF-89 = ATCC VR-1361.	Bacteria; Proteobacteria; Gammaproteobacteria; Thiotrichales;Piscirickettsiaceae; Piscirickettsia.	1227812	PSLF89_1069	chromosome	hypothetical protein	kinase domain protein [Piscirickettsia salmonis]	No orthologs found
U4TEH5	K661_00490	Phospho-2-dehydro-3-deoxyheptonate aldolase	-6.88316	6.2898	8.73494	Piscirickettsia salmonis LF-89 = ATCC VR-1361.	Bacteria; Proteobacteria; Gammaproteobacteria; Thiotrichales;Piscirickettsiaceae; Piscirickettsia.	1227812	PSLF89_109	chromosome	3-deoxy-7-phosphoheptulonate synthase	hypothetical protein [Piscirickettsia salmonis]_x0001_gb|KGP97523.1| phospho-2-dehydro-3-deoxyheptonate aldolase [Piscirickettsia salmonis]	E
U4TIE7	K661_00488	Glycosyl transferase 2 family protein	-6.33336	6.21387	6.89655	Piscirickettsia salmonis LF-89 = ATCC VR-1361.	Bacteria; Proteobacteria; Gammaproteobacteria; Thiotrichales;Piscirickettsiaceae; Piscirickettsia.	1227812	PSLF89_110	chromosome	hypothetical protein	glycosyl transferase 2 family protein [Piscirickettsia salmonis]	I
A0A0J1JDQ3	ORFNames=AB894_04315, PSLF89_1100	Periplasmic sugar-binding protein	-4.35165	6.6499	6.61157	Piscirickettsia salmonis LF-89 = ATCC VR-1361.	Bacteria; Proteobacteria; Gammaproteobacteria; Thiotrichales;Piscirickettsiaceae; Piscirickettsia.	1227812	PSLF89_1100	chromosome	hypothetical protein	hypothetical protein [Piscirickettsia salmonis]_x0001_gb|KGP96113.1| sugar ABC transporter periplasmic protein [Piscirickettsia salmonis]	G
U4TDJ0	scpB	Segregation and condensation protein B	-4.21527	6.34792	6.54206	Piscirickettsia salmonis LF-89 = ATCC VR-1361.	Bacteria; Proteobacteria; Gammaproteobacteria; Thiotrichales;Piscirickettsiaceae; Piscirickettsia.	1227812	PSLF89_1108	chromosome	segregation and condensation protein B	hypothetical protein [Piscirickettsia salmonis]_x0001_gb|KGP96105.1| segregation and condensation protein B [Piscirickettsia salmonis]	K
U4THE9	K661_00835	Uncharacterized protein	-4.81188	6.08419	17.284	Piscirickettsia salmonis LF-89 = ATCC VR-1361.	Bacteria; Proteobacteria; Gammaproteobacteria; Thiotrichales;Piscirickettsiaceae; Piscirickettsia.	1227812	PSLF89_1119	chromosome	hypothetical protein	hypothetical protein [Piscirickettsia salmonis]_x0001_gb|KGP96095.1| ABC1 family [Piscirickettsia salmonis]	No orthologs found
U4TDK1	K661_00832	Alanine racemase	-4.81175	7.69941	5.27778	Piscirickettsia salmonis LF-89 = ATCC VR-1361.	Bacteria; Proteobacteria; Gammaproteobacteria; Thiotrichales;Piscirickettsiaceae; Piscirickettsia.	1227812	PSLF89_1121	chromosome	hypothetical protein	hypothetical protein [Piscirickettsia salmonis]_x0001_gb|KGP96093.1| alanine racemase [Piscirickettsia salmonis]	M
A0A0J1JEE0	ORFNames=AB894_02890, PSLF89_1155	Amidohydrolase	-5.69243	6.36138	8.79121	Piscirickettsia salmonis LF-89 = ATCC VR-1361.	Bacteria; Proteobacteria; Gammaproteobacteria; Thiotrichales;Piscirickettsiaceae; Piscirickettsia.	1227812	PSLF89_1155	chromosome	amidohydrolase	amidohydrolase [Piscirickettsia salmonis]_x0001_gb|KGP94622.1| amidohydrolase [Piscirickettsia salmonis]	R
U4TIZ3	K661_01726	Transaldolase	-5.49747	6.12795	5.93472	Piscirickettsia salmonis LF-89 = ATCC VR-1361.	Bacteria; Proteobacteria; Gammaproteobacteria; Thiotrichales;Piscirickettsiaceae; Piscirickettsia.	1227812	PSLF89_1190	chromosome	transaldolase	hypothetical protein [Piscirickettsia salmonis]_x0001_gb|KGP94778.1| transaldolase family protein [Piscirickettsia salmonis]	G
U4TEV8	K661_01720	Bacterial extracellular solute-binding s, 3 family protein	-8.7553	6.67538	8.46154	Piscirickettsia salmonis LF-89 = ATCC VR-1361.	Bacteria; Proteobacteria; Gammaproteobacteria; Thiotrichales;Piscirickettsiaceae; Piscirickettsia.	1227812	PSLF89_1196	chromosome	hypothetical protein	hypothetical protein [Piscirickettsia salmonis]	No orthologs found
U4TJJ1	murF	UDP-N-acetylmuramoyl-tripeptide--D-alanyl-D-alanine ligase	-10.6393	8.39338	4.09483	Piscirickettsia salmonis LF-89 = ATCC VR-1361.	Bacteria; Proteobacteria; Gammaproteobacteria; Thiotrichales;Piscirickettsiaceae; Piscirickettsia.	1227812	PSLF89_12	chromosome	UDP-N-acetylmuramoyl-tripeptide--D-alanyl-D- alanine ligase	hypothetical protein [Piscirickettsia salmonis]_x0001_gb|KGP98248.1| UDP-N-acetylmuramoyl-tripeptide--D-alanyl-D-alanine ligase [Piscirickettsia salmonis]	M		Endotoxin
A0A0J1JCU5	ORFNames=AB894_06035, PSLF89_1208	Uncharacterized protein	-4.00515	7.75671	11.3537	Piscirickettsia salmonis LF-89 = ATCC VR-1361.	Bacteria; Proteobacteria; Gammaproteobacteria; Thiotrichales;Piscirickettsiaceae; Piscirickettsia.	1227812	PSLF89_1208	chromosome	hypothetical protein	hypothetical protein, partial [Piscirickettsia salmonis]	No orthologs found
A0A0J1J8T7	AB894_13245	Uncharacterized protein	-4.98742	6.43553	1.71289	Piscirickettsia salmonis LF-89 = ATCC VR-1361.	Bacteria; Proteobacteria; Gammaproteobacteria; Thiotrichales;Piscirickettsiaceae; Piscirickettsia.	1227812	PSLF89_1225	chromosome	hypothetical protein	hypothetical protein [Piscirickettsia salmonis]_x0001_gb|KGP98589.1| Transmembrane protein [Piscirickettsia salmonis]	No orthologs found
U4TH41	glnD	Bifunctional uridylyltransferase/uridylyl-removing enzyme	-4.65883	6.57715	2.59887	Piscirickettsia salmonis LF-89 = ATCC VR-1361.	Bacteria; Proteobacteria; Gammaproteobacteria; Thiotrichales;Piscirickettsiaceae; Piscirickettsia.	1227812	PSLF89_1236	chromosome	protein-PII uridylyltransferase	hypothetical protein [Piscirickettsia salmonis]_x0001_gb|KGP97700.1| protein-P-II uridylyltransferase [Piscirickettsia salmonis]	OT
U4TFG6	pyrH	Uridylate kinase	-8.34414	6.75597	18.3673	Piscirickettsia salmonis LF-89 = ATCC VR-1361.	Bacteria; Proteobacteria; Gammaproteobacteria; Thiotrichales;Piscirickettsiaceae; Piscirickettsia.	1227812	PSLF89_1240	chromosome	UMP kinase	hypothetical protein [Piscirickettsia salmonis]_x0001_gb|KGP97696.1| UMP kinase [Piscirickettsia salmonis]	F
A0A0H4QY27	uppS	Ditrans,polycis-undecaprenyl-diphosphate synthase ((2E,6E)-farnesyl-diphosphate specific)	-5.73605	6.4978	10.0806	Piscirickettsia salmonis LF-89 = ATCC VR-1361.	Bacteria; Proteobacteria; Gammaproteobacteria; Thiotrichales;Piscirickettsiaceae; Piscirickettsia.	1227812	PSLF89_1242	chromosome	UDP diphosphate synthase	UDP diphosphate synthase [Piscirickettsia salmonis]	I	(gi:29376987) cpsA (EF2495) - undecaprenyl diphosphate synthase [Enterococcus faecalis str. V583]	Antiphagocytosis, capsule
U4TH69	K661_00152	Bacterial lipid A biosynthesis acyltransferase family protein	-4.65674	5.91084	5.84192	Piscirickettsia salmonis LF-89 = ATCC VR-1361.	Bacteria; Proteobacteria; Gammaproteobacteria; Thiotrichales;Piscirickettsiaceae; Piscirickettsia.	1227812	PSLF89_1244	chromosome	lipid A biosynthesis acyltransferase	lipid A biosynthesis acyltransferase [Piscirickettsia salmonis]_x0001_gb|KGP97692.1| bacterial lipid A biosynthesis acyltransferase family protein[Piscirickettsia salmonis]	M		Endotoxin
A0A0J1J951	AB894_12730	Uncharacterized protein	-4.50216	7.65813	3.89105	Piscirickettsia salmonis LF-89 = ATCC VR-1361.	Bacteria; Proteobacteria; Gammaproteobacteria; Thiotrichales;Piscirickettsiaceae; Piscirickettsia.	1227812	PSLF89_1245	chromosome	hypothetical protein	hypothetical protein [Piscirickettsia salmonis]_x0001_gb|KGP97691.1| hypothetical protein KU39_00771 [Piscirickettsia salmonis]	No orthologs found
U4TFG1	K661_00147	GHMP kinase domain protein	-4.01407	5.8346	5.08475	Piscirickettsia salmonis LF-89 = ATCC VR-1361.	Bacteria; Proteobacteria; Gammaproteobacteria; Thiotrichales;Piscirickettsiaceae; Piscirickettsia.	1227812	PSLF89_1249	chromosome	GHMP kinase	hypothetical protein [Piscirickettsia salmonis]_x0001_gb|KGP97687.1| GHMP kinase domain protein [Piscirickettsia salmonis]	I
A0A0H4R1Y9	lpxD	UDP-3-O-acylglucosamine N-acyltransferase	-5.87823	6.38021	9.71429	Piscirickettsia salmonis LF-89 = ATCC VR-1361.	Bacteria; Proteobacteria; Gammaproteobacteria; Thiotrichales;Piscirickettsiaceae; Piscirickettsia.	1227812	PSLF89_1254	chromosome	UDP-3-O-(3-hydroxymyristoyl)glucosamine N-acyltransferase	hypothetical protein [Piscirickettsia salmonis]_x0001_gb|KGP97682.1| UDP-3-O-[3-hydroxymyristoyl] glucosamine N-acyltransferase [Piscirickettsia salmonis]	M	(gi:170717703) lpxD (HSM_1456) - UDP-3-O-(3-hydroxymyristoyl) glucosamine N-acyltransferase [Haemophilus somnus str. 2336]	Endotoxin
A0A0J1J967	AB894_12660	DNA-directed DNA polymerase	-5.81764	6.31889	2.41379	Piscirickettsia salmonis LF-89 = ATCC VR-1361.	Bacteria; Proteobacteria; Gammaproteobacteria; Thiotrichales;Piscirickettsiaceae; Piscirickettsia.	1227812	PSLF89_1259	chromosome	DNA polymerase III subunit alpha	DNA polymerase III, alpha subunit [Piscirickettsia salmonis]	L
U4TFE1	tilS	tRNA(Ile)-lysidine synthase	-5.18932	5.99482	8.07453	Piscirickettsia salmonis LF-89 = ATCC VR-1361.	Bacteria; Proteobacteria; Gammaproteobacteria; Thiotrichales;Piscirickettsiaceae; Piscirickettsia.	1227812	PSLF89_1261	chromosome	tRNA(Ile)-lysidine synthetase	tRNA(Ile)-lysidine synthetase [Piscirickettsia salmonis]_x0001_gb|KGP97674.1| tRNA(Ile)-lysidine synthetase [Piscirickettsia salmonis]	J
A0A0H4QZN1	PSLF89_1276	Uncharacterized protein	-5.32158	7.03611	10.9929	Piscirickettsia salmonis LF-89 = ATCC VR-1361.	Bacteria; Proteobacteria; Gammaproteobacteria; Thiotrichales;Piscirickettsiaceae; Piscirickettsia.	1227812	PSLF89_1276	chromosome	hypothetical protein	rasGEF domain protein [Piscirickettsia salmonis]	No orthologs found
U4TPL1	lanM	Type 2 lantibiotic biosynthesis LanM family protein	-10.8446	7.06394	5.24554	Piscirickettsia salmonis LF-89 = ATCC VR-1361.	Bacteria; Proteobacteria; Gammaproteobacteria; Thiotrichales;Piscirickettsiaceae; Piscirickettsia.	1227812	PSLF89_1277	chromosome	hypothetical protein	hypothetical protein [Piscirickettsia salmonis]_x0001_gb|KGP97669.1| type 2 lantibiotic biosynthesis LanM family protein [Piscirickettsia salmonis]	No orthologs found
A0A0H4QZN6	PSLF89_1281	Uncharacterized protein	-6.10304	6.19327	5.81818	Piscirickettsia salmonis LF-89 = ATCC VR-1361.	Bacteria; Proteobacteria; Gammaproteobacteria; Thiotrichales;Piscirickettsiaceae; Piscirickettsia.	1227812	PSLF89_1281	chromosome	hypothetical protein	hypothetical protein [Piscirickettsia salmonis]_x0001_gb|KGP97665.1| LysR family transcriptional regulator [Piscirickettsia salmonis]	No orthologs found
U4TC63	sodC1	Superoxide dismutase [Cu-Zn]	-4.57393	7.27917	12.8492	Piscirickettsia salmonis LF-89 = ATCC VR-1361.	Bacteria; Proteobacteria; Gammaproteobacteria; Thiotrichales;Piscirickettsiaceae; Piscirickettsia.	1227812	PSLF89_1289	chromosome	superoxide dismutase	superoxide dismutase [Piscirickettsia salmonis]	P	(gi:16764404) sodCI (STM1044) - superoxide dismutase precursor [Salmonella typhimurium str. LT2]	Stress adaptation
U4TD39	guaB	Inosine-5'-monophosphate dehydrogenase	-4.56894	6.65429	7.01031	Piscirickettsia salmonis LF-89 = ATCC VR-1361.	Bacteria; Proteobacteria; Gammaproteobacteria; Thiotrichales;Piscirickettsiaceae; Piscirickettsia.	1227812	PSLF89_1300	chromosome	IMP dehydrogenase	inosine 5'-monophosphate dehydrogenase [Piscirickettsia salmonis]_x0001_gb|KGP97140.1| inosine 5'-monophosphate dehydrogenase [Piscirickettsia salmonis]	T
U4TBL1	purL	Phosphoribosylformylglycinamidine synthase	-6.63473	7.9324	2.08012	Piscirickettsia salmonis LF-89 = ATCC VR-1361.	Bacteria; Proteobacteria; Gammaproteobacteria; Thiotrichales;Piscirickettsiaceae; Piscirickettsia.	1227812	PSLF89_1303	chromosome	phosphoribosylformylglycinamidine synthase	hypothetical protein [Piscirickettsia salmonis]_x0001_gb|KGP97143.1| phosphoribosylformylglycinamidine synthase [Piscirickettsia salmonis]	F
U4TGN3	K661_01092	Uncharacterized protein	-4.81382	6.39158	22.7848	Piscirickettsia salmonis LF-89 = ATCC VR-1361.	Bacteria; Proteobacteria; Gammaproteobacteria; Thiotrichales;Piscirickettsiaceae; Piscirickettsia.	1227812	PSLF89_1307	chromosome	hypothetical protein	hypothetical protein [Piscirickettsia salmonis]_x0001_gb|KGP97147.1| hypothetical protein KU39_01160 [Piscirickettsia salmonis]	No orthologs found
A0A0J1LY77	AB894_15375	Uncharacterized protein	-4.53529	5.92105	14.1892	Piscirickettsia salmonis LF-89 = ATCC VR-1361.	Bacteria; Proteobacteria; Gammaproteobacteria; Thiotrichales;Piscirickettsiaceae; Piscirickettsia.	1227812	PSLF89_1367	chromosome	lipid A biosynthesis acyltransferase	hypothetical protein [Piscirickettsia salmonis]_x0001_gb|KGP97905.1| bacterial lipid A biosynthesis acyltransferase family protein[Piscirickettsia salmonis]	I	(gi:33152230) htrB (HD1106) - lipid A biosynthesis lauroyl acyltransferase [Haemophilus ducreyi str. 35000HP]	Endotoxin
U4TII5	K661_00414	ABC transporter family protein	-4.61827	5.91211	2.9745	Piscirickettsia salmonis LF-89 = ATCC VR-1361.	Bacteria; Proteobacteria; Gammaproteobacteria; Thiotrichales;Piscirickettsiaceae; Piscirickettsia.	1227812	PSLF89_1371	chromosome	ABC transporter family protein	hypothetical protein [Piscirickettsia salmonis]_x0001_gb|AIE90166.1| type I secretion system ATPase [Piscirickettsia salmonis]_x0001_gb|KGP97900.1| ABC transporter family protein [Piscirickettsia salmonis]	V	(gi:147675369) rtxB (VC0395_A1058) - RtxB protein [Vibrio cholerae str. O395 chromosome II]	Toxin, efector protein
A0A075FK96	hlyB1	ABC transporter family protein	-4.12276	6.08641	5.29101	Piscirickettsia salmonis LF-89 = ATCC VR-1361.	Bacteria; Proteobacteria; Gammaproteobacteria; Thiotrichales;Piscirickettsiaceae; Piscirickettsia.	1227812	PSLF89_1372	chromosome	ABC transporter family protein	hypothetical protein [Piscirickettsia salmonis]_x0001_gb|AIE90167.1| type I secretion system ATPase [Piscirickettsia salmonis]_x0001_gb|KGP97103.1| ABC transporter family protein [Piscirickettsia salmonis]_x0001_gb|KGP97899.1| ABC transporter family protein [Piscirickettsia salmonis]	V
U4TH52	K661_02363	Uncharacterized protein	-23.5776	7.33428	26.7606	Piscirickettsia salmonis LF-89 = ATCC VR-1361.	Bacteria; Proteobacteria; Gammaproteobacteria; Thiotrichales;Piscirickettsiaceae; Piscirickettsia.	1227812	PSLF89_1391	chromosome	hypothetical protein	hypothetical protein [Piscirickettsia salmonis]_x0001_gb|KGP94033.1| hypothetical protein KU39_03499 [Piscirickettsia salmonis]	No orthologs found
A0A0J1JED0	ORFNames=AB894_03345, PSLF89_1397	Uncharacterized protein	-10.9891	6.67199	2.77427	Piscirickettsia salmonis LF-89 = ATCC VR-1361.	Bacteria; Proteobacteria; Gammaproteobacteria; Thiotrichales;Piscirickettsiaceae; Piscirickettsia.	1227812	PSLF89_1397	chromosome	hypothetical protein	hypothetical protein [Piscirickettsia salmonis]_x0001_gb|KGP94100.1| thiol:disulfide interchange protein [Piscirickettsia salmonis]	No orthologs found
A0A0H4QYE2	PSLF89_1400	Uncharacterized protein	-8.39282	6.45844	18.6667	Piscirickettsia salmonis LF-89 = ATCC VR-1361.	Bacteria; Proteobacteria; Gammaproteobacteria; Thiotrichales;Piscirickettsiaceae; Piscirickettsia.	1227812	PSLF89_1400	chromosome	hypothetical protein	hypothetical protein, partial [Piscirickettsia salmonis]_x0001_gb|KGP93369.1| N-acylamino acid racemase, partial [Piscirickettsia salmonis]	No orthologs found
A0A0H4R163	PSLF89_845	Uncharacterized protein	-6.63735	6.6718	37.5	Piscirickettsia salmonis LF-89 = ATCC VR-1361.	Bacteria; Proteobacteria; Gammaproteobacteria; Thiotrichales;Piscirickettsiaceae; Piscirickettsia.	1227812	PSLF89_1405	chromosome	hypothetical protein	hypothetical protein [Piscirickettsia salmonis]	No orthologs found
A0A0J1JAQ8	cydC	ABC transporter	-5.04077	6.72514	6.51408	Piscirickettsia salmonis LF-89 = ATCC VR-1361.	Bacteria; Proteobacteria; Gammaproteobacteria; Thiotrichales;Piscirickettsiaceae; Piscirickettsia.	1227812	PSLF89_1422	chromosome	ABC transporter	ABC transporter [Piscirickettsia salmonis]_x0001_gb|KGP94564.1| ABC transporter [Piscirickettsia salmonis]	CO	(gi:70730857) pchH (PFL_3495) - ABC transporter, ATP-binding/permease protein [Pseudomonas fluorescens str. Pf-5]	Metal uptake and heme acquisition
A0A0H4R0C4	PSLF89_1423	Uncharacterized protein	-6.82069	6.1431	10.2273	Piscirickettsia salmonis LF-89 = ATCC VR-1361.	Bacteria; Proteobacteria; Gammaproteobacteria; Thiotrichales;Piscirickettsiaceae; Piscirickettsia.	1227812	PSLF89_1423	chromosome	hypothetical protein	rasGEF domain protein [Piscirickettsia salmonis]	No orthologs found
A0A0H4QXG6	ponA	Peptidase	-5.09607	6.66366	4.38144	Piscirickettsia salmonis LF-89 = ATCC VR-1361.	Bacteria; Proteobacteria; Gammaproteobacteria; Thiotrichales;Piscirickettsiaceae; Piscirickettsia.	1227812	PSLF89_143	chromosome	peptidase	hypothetical protein [Piscirickettsia salmonis]_x0001_gb|KGP95382.1| penicillin-binding , 1A family protein [Piscirickettsia salmonis]	M
A0A0H4RH66	yjdL	H+ symporter family protein	-7.17482	6.40433	8.33333	Piscirickettsia salmonis LF-89 = ATCC VR-1361.	Bacteria; Proteobacteria; Gammaproteobacteria; Thiotrichales;Piscirickettsiaceae; Piscirickettsia.	1227812	PSLF89_1431	chromosome	H+ symporter family protein	hypothetical protein [Piscirickettsia salmonis]	E
A0A0J1JFY8	AB894_00210	Uncharacterized protein	-5.25639	6.34829	9.82906	Piscirickettsia salmonis LF-89 = ATCC VR-1361.	Bacteria; Proteobacteria; Gammaproteobacteria; Thiotrichales;Piscirickettsiaceae; Piscirickettsia.	1227812	PSLF89_1435	chromosome	hypothetical protein	hypothetical protein [Piscirickettsia salmonis]_x0001_gb|KGP94447.1| hypothetical protein KU39_03187 [Piscirickettsia salmonis]	No orthologs found
A0A0H4QYH0	PSLF89_1439	Uncharacterized protein	-4.05144	6.29409	4.23216	Piscirickettsia salmonis LF-89 = ATCC VR-1361.	Bacteria; Proteobacteria; Gammaproteobacteria; Thiotrichales;Piscirickettsiaceae; Piscirickettsia.	1227812	PSLF89_1439	chromosome	hypothetical protein	hypothetical protein [Piscirickettsia salmonis]	No orthologs found	(gi:74314887) ospD3 (SSO_P050) - OspD3 [Shigella sonnei str. 046 plasmid pSS_046]	Toxin, efector protein
U4TKF3	K661_01208	Putative molybdopterin binding domain protein	-4.98947	6.60162	9.23483	Piscirickettsia salmonis LF-89 = ATCC VR-1361.	Bacteria; Proteobacteria; Gammaproteobacteria; Thiotrichales;Piscirickettsiaceae; Piscirickettsia.	1227812	PSLF89_1447	chromosome	molybdopterin-binding protein	molybdopterin-binding protein [Piscirickettsia salmonis]	R
A0A0H4RHE3	PSLF89_1500	Uncharacterized protein	-5.82822	6.64647	12.1711	Piscirickettsia salmonis LF-89 = ATCC VR-1361.	Bacteria; Proteobacteria; Gammaproteobacteria; Thiotrichales;Piscirickettsiaceae; Piscirickettsia.	1227812	PSLF89_1500	chromosome	hypothetical protein	hypothetical protein [Piscirickettsia salmonis]	No orthologs found
U4TIL2	tsaD	tRNA N6-adenosine threonylcarbamoyltransferase	-6.29941	6.52791	6.21302	Piscirickettsia salmonis LF-89 = ATCC VR-1361.	Bacteria; Proteobacteria; Gammaproteobacteria; Thiotrichales;Piscirickettsiaceae; Piscirickettsia.	1227812	PSLF89_1510	chromosome	tRNA threonylcarbamoyl adenosine modification protein TsaD	tRNA threonylcarbamoyladenosine modification protein TsaD [Piscirickettsia salmonis]_x0001_gb|KGP94546.1| tRNA threonylcarbamoyl adenosine modification protein YgjD [Piscirickettsia salmonis]	J
U4TBW6	K661_02827	Major Facilitator Superfamily protein	-4.15745	5.93142	3.03797	Piscirickettsia salmonis LF-89 = ATCC VR-1361.	Bacteria; Proteobacteria; Gammaproteobacteria; Thiotrichales;Piscirickettsiaceae; Piscirickettsia.	1227812	PSLF89_1543	chromosome	hypothetical protein	hypothetical protein [Piscirickettsia salmonis]_x0001_gb|KGP97455.1| major Facilitator Superfamily protein [Piscirickettsia salmonis]	G
A0A0H4R075	rumA	23S rRNA (uracil(1939)-C(5))-methyltransferase RlmD	-5.84614	7.17106	6.23608	Piscirickettsia salmonis LF-89 = ATCC VR-1361.	Bacteria; Proteobacteria; Gammaproteobacteria; Thiotrichales;Piscirickettsiaceae; Piscirickettsia.	1227812	PSLF89_1545	chromosome	23S rRNA methyltransferase	hypothetical protein [Piscirickettsia salmonis]_x0001_gb|KGP97453.1| 23S rRNA (uracil-5-)-methyltransferase RumA [Piscirickettsia salmonis]	J
A0A0H4R2N6	relA	RelA	-4.9787	6.61454	1.72166	Piscirickettsia salmonis LF-89 = ATCC VR-1361.	Bacteria; Proteobacteria; Gammaproteobacteria; Thiotrichales;Piscirickettsiaceae; Piscirickettsia.	1227812	PSLF89_1546	chromosome	(p)ppGpp synthetase	(p)ppGpp synthetase [Piscirickettsia salmonis]_x0001_gb|KGP97452.1| (p)ppGpp synthetase [Piscirickettsia salmonis]	TK	(gi:148358987) relA (LPC_0872) - GTP pyrophosphokinase ((p)ppGpp synthetase I) stringent stress response RelA [Legionella pneumophila str. Corby]	Regulation
A0A0J1J991	ftsK	Cell division protein FtsK	-6.22731	6.24714	3.48558	Piscirickettsia salmonis LF-89 = ATCC VR-1361.	Bacteria; Proteobacteria; Gammaproteobacteria; Thiotrichales;Piscirickettsiaceae; Piscirickettsia.	1227812	PSLF89_1564	chromosome	cell division protein FtsK	hypothetical protein [Piscirickettsia salmonis]_x0001_gb|KGP98002.1| DNA translocase ftsK [Piscirickettsia salmonis]	D	(gi:49482524) essC (SAR0284) - hypothetical protein [Staphylococcus aureus str. MRSA252]	Secretion system
U4TFF4	K661_00773	Uncharacterized protein	-4.44407	5.98975	28.3019	Piscirickettsia salmonis LF-89 = ATCC VR-1361.	Bacteria; Proteobacteria; Gammaproteobacteria; Thiotrichales;Piscirickettsiaceae; Piscirickettsia.	1227812	PSLF89_1573	chromosome	DNA-binding protein	hypothetical protein [Piscirickettsia salmonis]_x0001_gb|KGP97993.1| helix-turn-helix domain protein [Piscirickettsia salmonis]	D
A0A0H4R0P3	hisS	Histidine--tRNA ligase	-4.15366	6.24157	4.94118	Piscirickettsia salmonis LF-89 = ATCC VR-1361.	Bacteria; Proteobacteria; Gammaproteobacteria; Thiotrichales;Piscirickettsiaceae; Piscirickettsia.	1227812	PSLF89_1575	chromosome	histidine--tRNA ligase	histidyl-tRNA synthetase [Piscirickettsia salmonis]_x0001_gb|KGP97991.1| histidine--tRNA ligase [Piscirickettsia salmonis]	J
A0A0H4RHK2	PSLF89_1594	Uncharacterized protein	-9.29958	6.7152	14.9826	Piscirickettsia salmonis LF-89 = ATCC VR-1361.	Bacteria; Proteobacteria; Gammaproteobacteria; Thiotrichales;Piscirickettsiaceae; Piscirickettsia.	1227812	PSLF89_1594	chromosome	hypothetical protein	chemotaxis phosphatase CheX family protein [Piscirickettsia salmonis]	T		Chemotaxis
A0A0J1LZJ8	gshA	Glutamate--cysteine ligase	-5.62226	6.10621	4.13534	Piscirickettsia salmonis LF-89 = ATCC VR-1361.	Bacteria; Proteobacteria; Gammaproteobacteria; Thiotrichales;Piscirickettsiaceae; Piscirickettsia.	1227812	PSLF89_1599	chromosome	glutamate--cysteine ligase	glutamate--cysteine ligase [Piscirickettsia salmonis]	H
A0A0H4RHL7	queE	7-carboxy-7-deazaguanine synthase	-19.6868	5.80345	7.90698	Piscirickettsia salmonis LF-89 = ATCC VR-1361.	Bacteria; Proteobacteria; Gammaproteobacteria; Thiotrichales;Piscirickettsiaceae; Piscirickettsia.	1227812	PSLF89_1610	chromosome	7-carboxy-7-deazaguanine synthase	7-carboxy-7-deazaguanine synthase [Piscirickettsia salmonis]_x0001_gb|KGP97959.1| 7-carboxy-7-deazaguanine synthase [Piscirickettsia salmonis]	R
U4TL78	K661_01265	Uncharacterized protein	-5.23476	6.0285	7.22611	Piscirickettsia salmonis LF-89 = ATCC VR-1361.	Bacteria; Proteobacteria; Gammaproteobacteria; Thiotrichales;Piscirickettsiaceae; Piscirickettsia.	1227812	PSLF89_1612	chromosome	slyX family protein	hypothetical protein [Piscirickettsia salmonis]_x0001_gb|KGP97957.1| slyX family protein [Piscirickettsia salmonis]	S
U4TNF9	proS	Proline--tRNA ligase	-4.3472	6.15782	3.16344	Piscirickettsia salmonis LF-89 = ATCC VR-1361.	Bacteria; Proteobacteria; Gammaproteobacteria; Thiotrichales;Piscirickettsiaceae; Piscirickettsia.	1227812	PSLF89_1621	chromosome	proline--tRNA ligase	hypothetical protein [Piscirickettsia salmonis]_x0001_gb|KGP97950.1| proline--tRNA ligase [Piscirickettsia salmonis]	J
U4TC99	ligA	DNA ligase	-4.74618	6.0092	2.65096	Piscirickettsia salmonis LF-89 = ATCC VR-1361.	Bacteria; Proteobacteria; Gammaproteobacteria; Thiotrichales;Piscirickettsiaceae; Piscirickettsia.	1227812	PSLF89_1646	chromosome	DNA ligase (NAD(+)) LigA; disrupted		No orthologs found
U4TH26	K661_02673	Aldehyde dehydrogenase family protein	-5.01517	8.41377	4.28266	Piscirickettsia salmonis LF-89 = ATCC VR-1361.	Bacteria; Proteobacteria; Gammaproteobacteria; Thiotrichales;Piscirickettsiaceae; Piscirickettsia.	1227812	PSLF89_1671	chromosome	succinate-semialdehyde dehydrogenase	hypothetical protein [Piscirickettsia salmonis]_x0001_gb|KGP94490.1| aldehyde dehydrogenase family protein [Piscirickettsia salmonis]	C
A0A0H4R0F5	gacS	Histidine kinase	-4.08073	6.41553	2.99786	Piscirickettsia salmonis LF-89 = ATCC VR-1361.	Bacteria; Proteobacteria; Gammaproteobacteria; Thiotrichales;Piscirickettsiaceae; Piscirickettsia.	1227812	PSLF89_1673	chromosome	histidine kinase	hypothetical protein [Piscirickettsia salmonis]_x0001_gb|KGP94492.1| HAMP domain protein [Piscirickettsia salmonis]	T	(gi:70731797) gacS (PFL_4451) - sensor protein GacS [Pseudomonas fluorescens str. Pf-5]	Regulation
A0A0H4R0X0	yfcY	Acetyl-CoA C-acetyltransferase family protein	-4.96979	7.40316	3.83795	Piscirickettsia salmonis LF-89 = ATCC VR-1361.	Bacteria; Proteobacteria; Gammaproteobacteria; Thiotrichales;Piscirickettsiaceae; Piscirickettsia.	1227812	PSLF89_1679	chromosome	acetyl-CoA acetyltransferase	hypothetical protein [Piscirickettsia salmonis]_x0001_gb|KGP97340.1| acetyl-CoA C-acetyltransferase family protein [Piscirickettsia salmonis]	I
U4TMN9	K661_00799	Bacterial regulatory s, tetR family protein	-4.07989	6.29732	20.5263	Piscirickettsia salmonis LF-89 = ATCC VR-1361.	Bacteria; Proteobacteria; Gammaproteobacteria; Thiotrichales;Piscirickettsiaceae; Piscirickettsia.	1227812	PSLF89_1681	chromosome	TetR family transcriptional regulator	hypothetical protein [Piscirickettsia salmonis]_x0001_gb|KGP97342.1| bacterial regulatory s, tetR family protein [Piscirickettsia salmonis]	K
U4TFC5	nagZ	Beta-hexosaminidase	-7.03572	6.0443	4.36046	Piscirickettsia salmonis LF-89 = ATCC VR-1361.	Bacteria; Proteobacteria; Gammaproteobacteria; Thiotrichales;Piscirickettsiaceae; Piscirickettsia.	1227812	PSLF89_1683	chromosome	beta-hexosaminidase	hypothetical protein [Piscirickettsia salmonis]_x0001_gb|KGP97344.1| glycosyl hydrolase family 3 N terminal domain protein [Piscirickettsia salmonis]	G
U4TLR2	K661_00802	Mechanosensitive ion channel family protein	-4.62031	7.92333	3.75335	Piscirickettsia salmonis LF-89 = ATCC VR-1361.	Bacteria; Proteobacteria; Gammaproteobacteria; Thiotrichales;Piscirickettsiaceae; Piscirickettsia.	1227812	PSLF89_1684	chromosome	mechanosensitive ion channel protein MscS	mechanosensitive ion channel protein MscS [Piscirickettsia salmonis]	M
A0A0J1JDU5	thrB	Homoserine kinase	-7.70133	6.79188	12.6543	Piscirickettsia salmonis LF-89 = ATCC VR-1361.	Bacteria; Proteobacteria; Gammaproteobacteria; Thiotrichales;Piscirickettsiaceae; Piscirickettsia.	1227812	PSLF89_1690	chromosome	homoserine kinase	homoserine kinase [Piscirickettsia salmonis]	E
A0A0J1M5F1	AB894_01200	Flagellin	-5.13955	7.55839	3.01887	Piscirickettsia salmonis LF-89 = ATCC VR-1361.	Bacteria; Proteobacteria; Gammaproteobacteria; Thiotrichales;Piscirickettsiaceae; Piscirickettsia.	1227812	PSLF89_1710	chromosome	B-type flagellin	hypothetical protein [Piscirickettsia salmonis]_x0001_gb|KGP96234.1| B-type flagellin [Piscirickettsia salmonis]	N	(gi:146307857) fliC (Pmen_2835) - flagellin domain protein [Pseudomonas mendocina str. ymp]	Adhesins, adherence and adhesion-related proteins
U4TGE3	K661_01183	Flagellar hook-associated protein 2	-4.01484	7.81606	4.98915	Piscirickettsia salmonis LF-89 = ATCC VR-1361.	Bacteria; Proteobacteria; Gammaproteobacteria; Thiotrichales;Piscirickettsiaceae; Piscirickettsia.	1227812	PSLF89_1713	chromosome	flagellar hook-associated family protein	hypothetical protein [Piscirickettsia salmonis]	N	(gi:153952081) fliD (JJD26997_1382) - flagellar hook-associated protein FliD [Campylobacter jejuni str. 269.97 (subsp. doylei)]	Motility and export apparatus
U4TLG1	fliS	Flagellar protein FliS	-4.77622	6.25172	22.3881	Piscirickettsia salmonis LF-89 = ATCC VR-1361.	Bacteria; Proteobacteria; Gammaproteobacteria; Thiotrichales;Piscirickettsiaceae; Piscirickettsia.	1227812	PSLF89_1714	chromosome	flagellar export chaperone FliS	hypothetical protein [Piscirickettsia salmonis]_x0001_gb|KGP96230.1| flagellar protein FliS [Piscirickettsia salmonis]	NU	(gi:146307853) fliS (Pmen_2831) - flagellar protein FliS [Pseudomonas mendocina str. ymp]	Adhesins, adherence and adhesion-related proteins
A0A0J1JFF7	ORFNames=AB894_01160, PSLF89_1720	Uncharacterized protein	-4.0812	5.76617	2.86396	Piscirickettsia salmonis LF-89 = ATCC VR-1361.	Bacteria; Proteobacteria; Gammaproteobacteria; Thiotrichales;Piscirickettsiaceae; Piscirickettsia.	1227812	PSLF89_1720	chromosome	hypothetical protein	hypothetical protein [Piscirickettsia salmonis]_x0001_gb|KGP96225.1| hypothetical protein KU39_01857 [Piscirickettsia salmonis]	No orthologs found
A0A0H4R0K5	PSLF89_1743	Uncharacterized protein	-6.74573	6.63313	16.5605	Piscirickettsia salmonis LF-89 = ATCC VR-1361.	Bacteria; Proteobacteria; Gammaproteobacteria; Thiotrichales;Piscirickettsiaceae; Piscirickettsia.	1227812	PSLF89_1743	chromosome	hypothetical protein	hypothetical protein [Piscirickettsia salmonis]_x0001_gb|KGP98032.1| glycine dehydrogenase subunit 2 [Piscirickettsia salmonis]	M
U4THX4	K661_02376	Uncharacterized protein	-4.08712	6.67678	2.08562	Piscirickettsia salmonis LF-89 = ATCC VR-1361.	Bacteria; Proteobacteria; Gammaproteobacteria; Thiotrichales;Piscirickettsiaceae; Piscirickettsia.	1227812	PSLF89_1750	chromosome	hypothetical protein	glycoside hydrolase family 2 immunoglobulin domain protein beta-sandwich, partial [Piscirickettsia salmonis]	No orthologs found
A0A0H4R0L4	pepA	Probable cytosol aminopeptidase	-8.97442	7.01862	10	Piscirickettsia salmonis LF-89 = ATCC VR-1361.	Bacteria; Proteobacteria; Gammaproteobacteria; Thiotrichales;Piscirickettsiaceae; Piscirickettsia.	1227812	PSLF89_1757	chromosome	aminopeptidase	hypothetical protein [Piscirickettsia salmonis]_x0001_gb|KGP96515.1| cytosol aminopeptidase [Piscirickettsia salmonis]	E
U4TMW4	queA	S-adenosylmethionine:tRNA ribosyltransferase-isomerase	-6.87374	6.23412	7.80347	Piscirickettsia salmonis LF-89 = ATCC VR-1361.	Bacteria; Proteobacteria; Gammaproteobacteria; Thiotrichales;Piscirickettsiaceae; Piscirickettsia.	1227812	PSLF89_1760	chromosome	S-adenosylmethionine:tRNA ribosyltransferase-isomerase	hypothetical protein [Piscirickettsia salmonis]_x0001_gb|KGP96518.1| tRNA ribosyltransferase-isomerase [Piscirickettsia salmonis]	J
A0A0J1LYW9	pabB	Aminodeoxychorismate synthase	-4.66669	7.27338	3.37553	Piscirickettsia salmonis LF-89 = ATCC VR-1361.	Bacteria; Proteobacteria; Gammaproteobacteria; Thiotrichales;Piscirickettsiaceae; Piscirickettsia.	1227812	PSLF89_1767	chromosome	aminodeoxychorismate synthase component I	hypothetical protein [Piscirickettsia salmonis]_x0001_gb|KGP96525.1| aminodeoxychorismate synthase, component I [Piscirickettsia salmonis]	EH	(gi:71735977) pchA (PSPPH_2904) - isochorismate synthase [Pseudomonas syringae str. 1448A (pv. phaseolicola)]	Metal uptake and heme acquisition
A0A0J1JBD1	minD	Site-determining protein	-4.77495	5.63633	5.14706	Piscirickettsia salmonis LF-89 = ATCC VR-1361.	Bacteria; Proteobacteria; Gammaproteobacteria; Thiotrichales;Piscirickettsiaceae; Piscirickettsia.	1227812	PSLF89_1792	chromosome	septum site-determining protein MinD	cell division inhibitor MinD [Piscirickettsia salmonis]_x0001_gb|KGP94579.1| cell division inhibitor MinD [Piscirickettsia salmonis]	D	(gi:118474588) flhG (CFF8240_1509) - ATPase, ParA family [Campylobacter fetus str. 82-40 (subsp. fetus)]	Motility and export apparatus
A0A0H4R0P9	dnaX	DNA polymerase III subunit gamma/tau	-7.78251	6.89566	3.56564	Piscirickettsia salmonis LF-89 = ATCC VR-1361.	Bacteria; Proteobacteria; Gammaproteobacteria; Thiotrichales;Piscirickettsiaceae; Piscirickettsia.	1227812	PSLF89_1809	chromosome	DNA polymerase III subunit gamma/tau	DNA polymerase III subunit gamma/tau [Piscirickettsia salmonis]_x0001_gb|KGP96144.1| DNA polymerase III subunit gamma/tau [Piscirickettsia salmonis]	L
A0A0J1JAZ2	recR	Recombination protein RecR	-6.98228	6.18832	8.08081	Piscirickettsia salmonis LF-89 = ATCC VR-1361.	Bacteria; Proteobacteria; Gammaproteobacteria; Thiotrichales;Piscirickettsiaceae; Piscirickettsia.	1227812	PSLF89_1811	chromosome	recombination protein RecR	hypothetical protein [Piscirickettsia salmonis]_x0001_gb|KGP96142.1| recombination protein RecR [Piscirickettsia salmonis]	L
U4TI27	K661_00575	Uncharacterized protein	-13.7249	7.43541	6.36943	Piscirickettsia salmonis LF-89 = ATCC VR-1361.	Bacteria; Proteobacteria; Gammaproteobacteria; Thiotrichales;Piscirickettsiaceae; Piscirickettsia.	1227812	PSLF89_1816	chromosome	hypothetical protein	hypothetical protein [Piscirickettsia salmonis]_x0001_gb|KGP96137.1| chromosome segregation protein SMC [Piscirickettsia salmonis]	D
A0A0J1M170	ORFNames=AB894_09340, PSLF89_1819	Uncharacterized protein	-4.14146	6.07088	43.9024	Piscirickettsia salmonis LF-89 = ATCC VR-1361.	Bacteria; Proteobacteria; Gammaproteobacteria; Thiotrichales;Piscirickettsiaceae; Piscirickettsia.	1227812	PSLF89_1819	chromosome	hypothetical protein	hypothetical protein [Piscirickettsia salmonis]_x0001_gb|KGP96134.1| response regulator [Piscirickettsia salmonis]	No orthologs found
A0A0J1JCI3	AB894_06355	Uncharacterized protein	-6.60847	5.91994	7.47331	Piscirickettsia salmonis LF-89 = ATCC VR-1361.	Bacteria; Proteobacteria; Gammaproteobacteria; Thiotrichales;Piscirickettsiaceae; Piscirickettsia.	1227812	PSLF89_1837	chromosome	hypothetical protein	tyrosine kinase family protein [Piscirickettsia salmonis]	No orthologs found
U4TIK7	K661_02159	Type I restriction modification DNA specificity domain protein	-5.33224	6.60905	6.63265	Piscirickettsia salmonis LF-89 = ATCC VR-1361.	Bacteria; Proteobacteria; Gammaproteobacteria; Thiotrichales;Piscirickettsiaceae; Piscirickettsia.	1227812	PSLF89_1842	chromosome	hypothetical protein	hypothetical protein [Piscirickettsia salmonis]_x0001_gb|KGP93654.1| heme response regulator HssR [Piscirickettsia salmonis]	No orthologs found		Metal uptake and heme acquisition
A0A0J1LZQ0	ORFNames=AB894_11935, PSLF89_1860	Guanylate kinase	-11.8938	6.35473	9.82659	Piscirickettsia salmonis LF-89 = ATCC VR-1361.	Bacteria; Proteobacteria; Gammaproteobacteria; Thiotrichales;Piscirickettsiaceae; Piscirickettsia.	1227812	PSLF89_1860	chromosome	guanylate kinase	hypothetical protein [Piscirickettsia salmonis]_x0001_gb|KGP98341.1| guanylate kinase family protein [Piscirickettsia salmonis]	No orthologs found
U4TDT9	ORFNames=AB894_12050, K661_00732	Macrophage killing with similarity to conjugation family protein	-5.15197	6.53326	19.403	Piscirickettsia salmonis LF-89 = ATCC VR-1361.	Bacteria; Proteobacteria; Gammaproteobacteria; Thiotrichales;Piscirickettsiaceae; Piscirickettsia.	1227812	PSLF89_1884	chromosome	hypothetical protein	type IV secretion system protein IcmL [Piscirickettsia salmonis]_x0001_gb|KGQ00381.1| type IV secretion protein IcmL [Piscirickettsia salmonis]	U	(gi:52840694) icmL/dotI (lpg0449) - IcmL (DotI) [Legionella pneumophila str. Philadelphia 1]	Secretion system
U4TAB2	K661_02546	Uncharacterized protein	-4.48392	7.9718	1.75219	Piscirickettsia salmonis LF-89 = ATCC VR-1361.	Bacteria; Proteobacteria; Gammaproteobacteria; Thiotrichales;Piscirickettsiaceae; Piscirickettsia.	1227812	PSLF89_1892	chromosome	hypothetical protein	hypothetical protein, partial [Piscirickettsia salmonis]_x0001_gb|KGP98385.1| twin-arginine translocation pathway signal, partial [Piscirickettsia salmonis]	No orthologs found
U4TCY9	K661_02396	LysR substrate binding domain protein	-4.24391	7.42712	4.23453	Piscirickettsia salmonis LF-89 = ATCC VR-1361.	Bacteria; Proteobacteria; Gammaproteobacteria; Thiotrichales;Piscirickettsiaceae; Piscirickettsia.	1227812	PSLF89_190	chromosome	hypothetical protein	LysR substrate binding domain protein [Piscirickettsia salmonis]	K
A0A0J1J9F3	ORFNames=AB894_12190, PSLF89_1911	Uncharacterized protein	-4.47333	6.31661	19.2308	Piscirickettsia salmonis LF-89 = ATCC VR-1361.	Bacteria; Proteobacteria; Gammaproteobacteria; Thiotrichales;Piscirickettsiaceae; Piscirickettsia.	1227812	PSLF89_1911	chromosome	hypothetical protein	hypothetical protein [Piscirickettsia salmonis]_x0001_gb|KGP98367.1| UTP--glucose-1-phosphate uridylyltransferase [Piscirickettsia salmonis]	No orthologs found
U4TDF3	psd	Phosphatidylserine decarboxylase proenzyme	-6.73374	6.68778	9.12052	Piscirickettsia salmonis LF-89 = ATCC VR-1361.	Bacteria; Proteobacteria; Gammaproteobacteria; Thiotrichales;Piscirickettsiaceae; Piscirickettsia.	1227812	PSLF89_1919	chromosome	phosphatidylserine decarboxylase	hypothetical protein [Piscirickettsia salmonis]_x0001_gb|KGP95414.1| phosphatidylserine decarboxylase [Piscirickettsia salmonis]	I
U4TDG1	K661_01411	Ferritin-like domain protein	-4.40146	5.87197	23.7179	Piscirickettsia salmonis LF-89 = ATCC VR-1361.	Bacteria; Proteobacteria; Gammaproteobacteria; Thiotrichales;Piscirickettsiaceae; Piscirickettsia.	1227812	PSLF89_1925	chromosome	DNA starvation/stationary phase protection protein	ferritin-like domain protein [Piscirickettsia salmonis]_x0001_gb|ERL60952.1| ferritin-like domain protein [Piscirickettsia salmonis LF-89= ATCC VR-1361]_x0001_gb|KGP95419.1| ferritin-like domain protein [Piscirickettsia salmonis]_x0001_gb|KGP97439.1| ferritin-like domain protein [Piscirickettsia salmonis]	PV	(gi:188527050) napA (HPSH_01265) - neutrophil activating protein (napA) (bacterioferritin) [Helicobacter pylori str. Shi470]	Host immune evasion, molecular mimicry
A0A0H4R202	PSLF89_2411	Uncharacterized protein	-4.29458	6.31267	30.9091	Piscirickettsia salmonis LF-89 = ATCC VR-1361.	Bacteria; Proteobacteria; Gammaproteobacteria; Thiotrichales;Piscirickettsiaceae; Piscirickettsia.	1227812	PSLF89_1931	chromosome	hypothetical protein	hypothetical protein [Piscirickettsia salmonis]_x0001_gb|KGP95424.1| pentapeptide repeats family protein [Piscirickettsia salmonis]	No orthologs found
A0A0J1JG21	ORFNames=AB894_00045, PSLF89_1947	Fimbrial protein FimV	-6.34531	6.87724	8.61678	Piscirickettsia salmonis LF-89 = ATCC VR-1361.	Bacteria; Proteobacteria; Gammaproteobacteria; Thiotrichales;Piscirickettsiaceae; Piscirickettsia.	1227812	PSLF89_1947	chromosome	fimbrial protein FimV	hypothetical protein [Piscirickettsia salmonis]_x0001_gb|KGP95258.1| fimV domain protein [Piscirickettsia salmonis]	NW	(gi:104780846) fimV (PSEEN1688) - hypothetical protein [Pseudomonas entomophila str. L48]	Adhesins, adherence and adhesion-related proteins
U4TKS3	accD	Acetyl-coenzyme A carboxylase carboxyl transferase subunit beta	-4.1165	6.45835	14.3357	Piscirickettsia salmonis LF-89 = ATCC VR-1361.	Bacteria; Proteobacteria; Gammaproteobacteria; Thiotrichales;Piscirickettsiaceae; Piscirickettsia.	1227812	PSLF89_1949	chromosome	acetyl-CoA carboxylase subunit beta	hypothetical protein [Piscirickettsia salmonis]_x0001_gb|KGP95256.1| acetyl-CoA carboxylase, carboxyl transferase, beta subunit [Piscirickettsia salmonis]	I
A0A0H4R105	folC	Bifunctional FolC family protein	-7.38597	8.50909	4.04762	Piscirickettsia salmonis LF-89 = ATCC VR-1361.	Bacteria; Proteobacteria; Gammaproteobacteria; Thiotrichales;Piscirickettsiaceae; Piscirickettsia.	1227812	PSLF89_1950	chromosome	bifunctional FolC family protein	hypothetical protein [Piscirickettsia salmonis]_x0001_gb|KGP95255.1| bifunctional FolC family protein [Piscirickettsia salmonis]	H
A0A0H4RIA7	miaE	MiaE	-4.28365	6.29544	11.7647	Piscirickettsia salmonis LF-89 = ATCC VR-1361.	Bacteria; Proteobacteria; Gammaproteobacteria; Thiotrichales;Piscirickettsiaceae; Piscirickettsia.	1227812	PSLF89_1953	chromosome	tRNA hydroxylase	hypothetical protein [Piscirickettsia salmonis]_x0001_gb|KGP95252.1| putative tRNA-(Ms(2)io(6)a)-hydroxylase [Piscirickettsia salmonis]	J
A0A0J1LZA6	AB894_12950	Protein HflC	-5.40894	7.03448	4.3771	Piscirickettsia salmonis LF-89 = ATCC VR-1361.	Bacteria; Proteobacteria; Gammaproteobacteria; Thiotrichales;Piscirickettsiaceae; Piscirickettsia.	1227812	PSLF89_1976	chromosome	hflC protein	hypothetical protein [Piscirickettsia salmonis]_x0001_gb|KGP97196.1| hflC protein [Piscirickettsia salmonis]	O
U4T7T4	K661_02927	AAA domain protein	-4.30332	6.73739	11.0553	Piscirickettsia salmonis LF-89 = ATCC VR-1361.	Bacteria; Proteobacteria; Gammaproteobacteria; Thiotrichales;Piscirickettsiaceae; Piscirickettsia.	1227812	PSLF89_1985	chromosome	ABC transporter family protein	ferrichrome transport ATP-binding protein [Piscirickettsia salmonis]_x0001_gb|KGP96603.1| ABC transporter family protein [Piscirickettsia salmonis]	PH	(gi:300857447) fagC (cpfrc_00030) - ATP-binding component of ABC transporter [Corynebacterium pseudotuberculosis str. FRC41]	Metal uptake and heme acquisition
A0A0J1JD50	iucA	IucA	-4.81394	6.21883	2.57235	Piscirickettsia salmonis LF-89 = ATCC VR-1361.	Bacteria; Proteobacteria; Gammaproteobacteria; Thiotrichales;Piscirickettsiaceae; Piscirickettsia.	1227812	PSLF89_1987	chromosome	hypothetical protein	hypothetical protein [Piscirickettsia salmonis]_x0001_gb|KGP96605.1| ferric iron reductase FhuF-like transporter family protein [Piscirickettsia salmonis]	P		Metal uptake and heme acquisition
A0A075FK92	pvsB	Siderophore carboxylate biosynthesis protein	-4.3841	6.60253	2.47748	Piscirickettsia salmonis LF-89 = ATCC VR-1361.	Bacteria; Proteobacteria; Gammaproteobacteria; Thiotrichales;Piscirickettsiaceae; Piscirickettsia.	1227812	PSLF89_1989	chromosome	hypothetical protein	ferric iron reductase FhuF-like transporter family protein [Piscirickettsia salmonis]	P	(gi:152984481) acsA (PSPA7_3092) - IucA/IucC [Pseudomonas aeruginosa str. PA7]	Metal uptake and heme acquisition
A0A0H4R4Q8	PSLF89_1p23	Uncharacterized protein	-4.09638	8.17833	5.6338	Piscirickettsia salmonis LF-89 = ATCC VR-1361.	Bacteria; Proteobacteria; Gammaproteobacteria; Thiotrichales;Piscirickettsiaceae; Piscirickettsia.	1227812	PSLF89_1p23	pPSLF89-1	hypothetical protein	transcriptional regulator family protein [Piscirickettsia salmonis]	No orthologs found
A0A0J1J9N8	ORFNames=AB894_11790, PSLF89_1p28	Resolvase	-4.21108	5.84027	20.1058	Piscirickettsia salmonis LF-89 = ATCC VR-1361.	Bacteria; Proteobacteria; Gammaproteobacteria; Thiotrichales;Piscirickettsiaceae; Piscirickettsia.	1227812	PSLF89_1p28	pPSLF89-1	resolvase	resolvase [Piscirickettsia salmonis]_x0001_gb|KGP95578.1| resolvase [Piscirickettsia salmonis]	L
U4TG24	K661_02998	Uncharacterized protein	-4.02329	6.16884	16.9811	Piscirickettsia salmonis LF-89 = ATCC VR-1361.	Bacteria; Proteobacteria; Gammaproteobacteria; Thiotrichales;Piscirickettsiaceae; Piscirickettsia.	1227812	PSLF89_1p57	pPSLF89-1	hypothetical protein	hypothetical protein [Piscirickettsia salmonis]	No orthologs found
U4TAG7	K661_02488	Uncharacterized protein	-8.02028	7.32587	8.20896	Piscirickettsia salmonis LF-89 = ATCC VR-1361.	Bacteria; Proteobacteria; Gammaproteobacteria; Thiotrichales;Piscirickettsiaceae; Piscirickettsia.	1227812	PSLF89_2029	chromosome	hypothetical protein	hypothetical protein [Piscirickettsia salmonis]	S
A0A0J1JF06	typA	GTP-binding protein TypA	-10.6033	6.57273	8.9404	Piscirickettsia salmonis LF-89 = ATCC VR-1361.	Bacteria; Proteobacteria; Gammaproteobacteria; Thiotrichales;Piscirickettsiaceae; Piscirickettsia.	1227812	PSLF89_203	chromosome	GTP-binding protein TypA	GTP-binding protein TypA [Piscirickettsia salmonis]_x0001_gb|KGP95025.1| GTP-binding protein TypA [Piscirickettsia salmonis]	T	(gi:42560712) tuf (MSC_0160) - translation elongation factor Tu [Mycoplasma mycoides str. PG1]	Adhesins, adherence and adhesion-related proteins
A0A0J1JAZ1	pyrG	CTP synthase	-5.4694	6.15954	5.33088	Piscirickettsia salmonis LF-89 = ATCC VR-1361.	Bacteria; Proteobacteria; Gammaproteobacteria; Thiotrichales;Piscirickettsiaceae; Piscirickettsia.	1227812	PSLF89_2043	chromosome	CTP synthetase	CTP synthase [Piscirickettsia salmonis]_x0001_gb|KGP96557.1| CTP synthase [Piscirickettsia salmonis]	F
U4TMD5	safA	Spore coat assembly SafA domain protein	-4.46874	6.55615	4.79134	Piscirickettsia salmonis LF-89 = ATCC VR-1361.	Bacteria; Proteobacteria; Gammaproteobacteria; Thiotrichales;Piscirickettsiaceae; Piscirickettsia.	1227812	PSLF89_2108	chromosome	spore coat assembly SafA domain protein	hypothetical protein [Piscirickettsia salmonis]_x0001_gb|KGP97825.1| spore coat assembly SafA domain protein [Piscirickettsia salmonis]	M	(gi:16802625) iap/cwhA (lmo0582) - P60 extracellular protein, invasion associated protein Iap [Listeria monocytogenes str. EGD-e (serovar 1/2a)]	Invasion, intracellular survival
A0A0H4QXE1	algC	AlgC	-5.19903	6.30939	5.66449	Piscirickettsia salmonis LF-89 = ATCC VR-1361.	Bacteria; Proteobacteria; Gammaproteobacteria; Thiotrichales;Piscirickettsiaceae; Piscirickettsia.	1227812	PSLF89_211	chromosome	phosphoglucomutase	hypothetical protein [Piscirickettsia salmonis]_x0001_gb|KGP95017.1| phosphomannomutase/phosphoglucomutase [Piscirickettsia salmonis]	G	(gi:15600515) algC (PA5322) - phosphomannomutase AlgC [Pseudomonas aeruginosa str. PAO1]	Antiphagocytosis, capsule
U4TIZ2	K661_02012	Uncharacterized protein	-4.12656	7.03913	2.43363	Piscirickettsia salmonis LF-89 = ATCC VR-1361.	Bacteria; Proteobacteria; Gammaproteobacteria; Thiotrichales;Piscirickettsiaceae; Piscirickettsia.	1227812	PSLF89_216	chromosome	hypothetical protein	hypothetical protein [Piscirickettsia salmonis]	No orthologs found
U4TLN0	K661_01119	Homogentisate 1,2-dioxygenase family protein	-7.28788	6.77468	6.34921	Piscirickettsia salmonis LF-89 = ATCC VR-1361.	Bacteria; Proteobacteria; Gammaproteobacteria; Thiotrichales;Piscirickettsiaceae; Piscirickettsia.	1227812	PSLF89_2165	chromosome	homogentisate 1,2-dioxygenase	hypothetical protein [Piscirickettsia salmonis]_x0001_gb|KGP95281.1| homogentisate 1,2-dioxygenase family protein [Piscirickettsia salmonis]	Q
U4TEB8	K661_01114	Pyridoxal-phosphate dependent enzyme family protein	-4.30849	6.88341	6.21118	Piscirickettsia salmonis LF-89 = ATCC VR-1361.	Bacteria; Proteobacteria; Gammaproteobacteria; Thiotrichales;Piscirickettsiaceae; Piscirickettsia.	1227812	PSLF89_2175	chromosome	hypothetical protein	hypothetical protein [Piscirickettsia salmonis]_x0001_gb|KGP96180.1| pyridoxal-phosphate dependent enzyme family protein [Piscirickettsia salmonis]	E
U4TE23	K661_02009	Exodeoxyribonuclease III	-7.39254	7.7512	7.69231	Piscirickettsia salmonis LF-89 = ATCC VR-1361.	Bacteria; Proteobacteria; Gammaproteobacteria; Thiotrichales;Piscirickettsiaceae; Piscirickettsia.	1227812	PSLF89_220	chromosome	DNA-(apurinic or apyrimidinic site) lyase	hypothetical protein [Piscirickettsia salmonis]_x0001_gb|KGP95162.1| exodeoxyribonuclease III [Piscirickettsia salmonis]	L
A0A0J1JD69	ORFNames=AB894_05175, PSLF89_2205	Uncharacterized protein	-4.0452	6.18931	3.03738	Piscirickettsia salmonis LF-89 = ATCC VR-1361.	Bacteria; Proteobacteria; Gammaproteobacteria; Thiotrichales;Piscirickettsiaceae; Piscirickettsia.	1227812	PSLF89_2205	chromosome	hypothetical protein	hypothetical protein [Piscirickettsia salmonis]_x0001_gb|KGP94818.1| carboxypeptidase regulatory-like domain protein [Piscirickettsia salmonis]	No orthologs found
A0A0J1JE29	AB894_03610	Hydroxyethylthiazole kinase	-4.05377	6.65827	7.21443	Piscirickettsia salmonis LF-89 = ATCC VR-1361.	Bacteria; Proteobacteria; Gammaproteobacteria; Thiotrichales;Piscirickettsiaceae; Piscirickettsia.	1227812	PSLF89_221	chromosome	bifunctional ADP-dependent (S)-NAD(P)H-hydrate dehydratase/NAD(P)H-hydrate epimerase	hypothetical protein [Piscirickettsia salmonis]_x0001_gb|KGP95163.1| yjeF-related family protein [Piscirickettsia salmonis]	F
A0A0J1JCH3	ORFNames=AB894_06375, PSLF89_2212	Uncharacterized protein	-4.41306	6.35901	14.5631	Piscirickettsia salmonis LF-89 = ATCC VR-1361.	Bacteria; Proteobacteria; Gammaproteobacteria; Thiotrichales;Piscirickettsiaceae; Piscirickettsia.	1227812	PSLF89_2212	chromosome	hypothetical protein	hypothetical protein [Piscirickettsia salmonis]_x0001_gb|KGP94642.1| serine/threonine protein kinase [Piscirickettsia salmonis]	T		Chemotaxis
U4TE75	lpxK	Tetraacyldisaccharide 4'-kinase	-6.50536	6.2505	6.77966	Piscirickettsia salmonis LF-89 = ATCC VR-1361.	Bacteria; Proteobacteria; Gammaproteobacteria; Thiotrichales;Piscirickettsiaceae; Piscirickettsia.	1227812	PSLF89_2215	chromosome	tetraacyldisaccharide 4'-kinase	hypothetical protein [Piscirickettsia salmonis]_x0001_gb|KGP94645.1| tetraacyldisaccharide 4'-kinase [Piscirickettsia salmonis]	M	(gi:113460801) lpxK (HS_0656) - tetraacyldisaccharide 4'-kinase (lipid-A 4'-kinase) [Haemophilus somnus str. 129PT]	Endotoxin
A0A0H4R4A3	PSLF89_2241	DEAD/DEAH box helicase	-4.33402	6.00749	4.39815	Piscirickettsia salmonis LF-89 = ATCC VR-1361.	Bacteria; Proteobacteria; Gammaproteobacteria; Thiotrichales;Piscirickettsiaceae; Piscirickettsia.	1227812	PSLF89_2241	chromosome	hypothetical protein	hypothetical protein [Piscirickettsia salmonis]_x0001_gb|KGP97060.1| RNA helicase [Piscirickettsia salmonis]	L
U4T9F0	K661_02328	Zinc carboxypeptidase family protein	-4.93085	6.05854	6.31579	Piscirickettsia salmonis LF-89 = ATCC VR-1361.	Bacteria; Proteobacteria; Gammaproteobacteria; Thiotrichales;Piscirickettsiaceae; Piscirickettsia.	1227812	PSLF89_2242	chromosome	hypothetical protein	hypothetical protein [Piscirickettsia salmonis]_x0001_gb|KGP97059.1| zinc carboxypeptidase family protein [Piscirickettsia salmonis]	M
A0A0J1JEB9	ORFNames=AB894_03240, PSLF89_2246	Uncharacterized protein	-4.34703	6.05818	2.89093	Piscirickettsia salmonis LF-89 = ATCC VR-1361.	Bacteria; Proteobacteria; Gammaproteobacteria; Thiotrichales;Piscirickettsiaceae; Piscirickettsia.	1227812	PSLF89_2246	chromosome	hypothetical protein	hypothetical protein [Piscirickettsia salmonis]_x0001_gb|KGP97055.1| putative membrane protein [Piscirickettsia salmonis]	No orthologs found
A0A0J1JEB6	ORFNames=AB894_03210, PSLF89_2251	Kinase	-4.10522	6.1954	4.77223	Piscirickettsia salmonis LF-89 = ATCC VR-1361.	Bacteria; Proteobacteria; Gammaproteobacteria; Thiotrichales;Piscirickettsiaceae; Piscirickettsia.	1227812	PSLF89_2251	chromosome	kinase	hypothetical protein [Piscirickettsia salmonis]_x0001_gb|KGP97049.1| kinase domain protein [Piscirickettsia salmonis]	T
U4TJ17	K661_01980	Biopterin-dependent aromatic amino acid hydroxylase family protein	-4.0044	7.4633	14.5985	Piscirickettsia salmonis LF-89 = ATCC VR-1361.	Bacteria; Proteobacteria; Gammaproteobacteria; Thiotrichales;Piscirickettsiaceae; Piscirickettsia.	1227812	PSLF89_228	chromosome	aromatic amino acid hydroxylase	hypothetical protein [Piscirickettsia salmonis]_x0001_gb|KGP95170.1| biopterin-dependent aromatic amino acid hydroxylase family protein[Piscirickettsia salmonis]	E
U4TJC9	K661_00134	Sulfate transporter family protein	-4.73561	6.98488	7.07269	Piscirickettsia salmonis LF-89 = ATCC VR-1361.	Bacteria; Proteobacteria; Gammaproteobacteria; Thiotrichales;Piscirickettsiaceae; Piscirickettsia.	1227812	PSLF89_2280	chromosome	Bicarbonate transporter BicA	Bicarbonate transporter BicA [Piscirickettsia salmonis]	P
U4TAB4	K661_01982	Uncharacterized protein	-4.0589	6.96986	3.73832	Piscirickettsia salmonis LF-89 = ATCC VR-1361.	Bacteria; Proteobacteria; Gammaproteobacteria; Thiotrichales;Piscirickettsiaceae; Piscirickettsia.	1227812	PSLF89_229	chromosome	hypothetical protein	hypothetical protein [Piscirickettsia salmonis]_x0001_gb|KGP95171.1| head HK97 family portal protein [Piscirickettsia salmonis]	No orthologs found
U4THD1	K661_02566	Malic enzyme, NAD binding domain protein	-7.04234	6.3756	6.73077	Piscirickettsia salmonis LF-89 = ATCC VR-1361.	Bacteria; Proteobacteria; Gammaproteobacteria; Thiotrichales;Piscirickettsiaceae; Piscirickettsia.	1227812	PSLF89_234	chromosome	malate dehydrogenase	hypothetical protein [Piscirickettsia salmonis]_x0001_gb|KGP96940.1| malic enzyme, NAD binding domain protein [Piscirickettsia salmonis]	C
U4T9A8	K661_02908	Uncharacterized protein	-4.27192	7.19173	10.2362	Piscirickettsia salmonis LF-89 = ATCC VR-1361.	Bacteria; Proteobacteria; Gammaproteobacteria; Thiotrichales;Piscirickettsiaceae; Piscirickettsia.	1227812	PSLF89_2348	chromosome	response regulator	hypothetical protein [Piscirickettsia salmonis]_x0001_gb|KGP95231.1| response regulator [Piscirickettsia salmonis]	NT	(gi:59712486) cheV (VF1879) - chemotaxis protein CheV [Vibrio fischeri str. ES114 chromosome I]	Chemotaxis
U4TI53	K661_02302	NAD(P)H quinone oxidoreductase, PIG3 family protein	-15.7557	7.51976	9.5092	Piscirickettsia salmonis LF-89 = ATCC VR-1361.	Bacteria; Proteobacteria; Gammaproteobacteria; Thiotrichales;Piscirickettsiaceae; Piscirickettsia.	1227812	PSLF89_2356	chromosome	NAD(P)H-quinone oxidoreductase	NAD(P)H-quinone oxidoreductase, partial [Piscirickettsia salmonis]	CR
U4TAM0	K661_01899	Helix-turn-helix domain protein	-4.64211	5.95687	4.57317	Piscirickettsia salmonis LF-89 = ATCC VR-1361.	Bacteria; Proteobacteria; Gammaproteobacteria; Thiotrichales;Piscirickettsiaceae; Piscirickettsia.	1227812	PSLF89_2366	chromosome	response regulator	response regulator [Piscirickettsia salmonis]_x0001_gb|KGP94355.1| response regulator [Piscirickettsia salmonis]	NT	(gi:28897547) cheV (VP0773) - chemotaxis CheV [Vibrio parahaemolyticus str. RIMD 2210633 chromosome I]	Chemotaxis
U4TER1	K661_00384	MMPL family protein	-5.157	9.17939	2.75049	Piscirickettsia salmonis LF-89 = ATCC VR-1361.	Bacteria; Proteobacteria; Gammaproteobacteria; Thiotrichales;Piscirickettsiaceae; Piscirickettsia.	1227812	PSLF89_2386	chromosome	MMPL family protein	hypothetical protein [Piscirickettsia salmonis]_x0001_gb|KGP97461.1| MMPL family protein [Piscirickettsia salmonis]	V
U4TGD5	K661_00392	Uncharacterized protein	-4.1501	6.23991	6.69856	Piscirickettsia salmonis LF-89 = ATCC VR-1361.	Bacteria; Proteobacteria; Gammaproteobacteria; Thiotrichales;Piscirickettsiaceae; Piscirickettsia.	1227812	PSLF89_2394	chromosome	hypothetical protein	hypothetical protein [Piscirickettsia salmonis]_x0001_gb|KGP97474.1| Type IV / VI secretion system, DotU [Piscirickettsia salmonis]	U		Secretion system
U4TNU2	K661_00399	Uncharacterized protein	-8.85128	5.69845	2.61233	Piscirickettsia salmonis LF-89 = ATCC VR-1361.	Bacteria; Proteobacteria; Gammaproteobacteria; Thiotrichales;Piscirickettsiaceae; Piscirickettsia.	1227812	PSLF89_2401	chromosome	hypothetical protein	hypothetical protein [Piscirickettsia salmonis]_x0001_gb|KGP97481.1| hypothetical protein KU39_00938 [Piscirickettsia salmonis]	No orthologs found
A0A0J1M3M1	ORFNames=AB894_04800, PSLF89_2403	Uncharacterized protein	-9.36102	5.87137	2.85714	Piscirickettsia salmonis LF-89 = ATCC VR-1361.	Bacteria; Proteobacteria; Gammaproteobacteria; Thiotrichales;Piscirickettsiaceae; Piscirickettsia.	1227812	PSLF89_2403	chromosome	hypothetical protein	hypothetical protein [Piscirickettsia salmonis]_x0001_gb|KGP97483.1| glycogen synthase [Piscirickettsia salmonis]	No orthologs found
U4TMW2	K661_00402	Uncharacterized protein	-4.3425	6.3927	3.19527	Piscirickettsia salmonis LF-89 = ATCC VR-1361.	Bacteria; Proteobacteria; Gammaproteobacteria; Thiotrichales;Piscirickettsiaceae; Piscirickettsia.	1227812	PSLF89_2404	chromosome	hypothetical protein	hypothetical protein [Piscirickettsia salmonis]_x0001_gb|KGP97484.1| ribonucleoside-diphosphate reductase [Piscirickettsia salmonis]	No orthologs found
U4TAS4	K661_03181	Uncharacterized protein	-4.88534	6.62623	8.54167	Piscirickettsia salmonis LF-89 = ATCC VR-1361.	Bacteria; Proteobacteria; Gammaproteobacteria; Thiotrichales;Piscirickettsiaceae; Piscirickettsia.	1227812	PSLF89_2407	chromosome	intracellular growth locus iglB	intracellular growth locus iglB [Piscirickettsia salmonis]_x0001_gb|KGP97487.1| intracellular growth locus iglB [Piscirickettsia salmonis]	U	(gi:146307348) Pmen_2323 - protein of unknown function DUF877 [Pseudomonas mendocina str. ymp]	Secretion system
A0A0J1JDF4	ORFNames=AB894_04840, PSLF89_2413	Uncharacterized protein	-8.58857	7.3386	7.34967	Piscirickettsia salmonis LF-89 = ATCC VR-1361.	Bacteria; Proteobacteria; Gammaproteobacteria; Thiotrichales;Piscirickettsiaceae; Piscirickettsia.	1227812	PSLF89_2413	chromosome	hypothetical protein	hypothetical protein [Piscirickettsia salmonis]	No orthologs found
A0A0H4RJ83	PSLF89_2414	Uncharacterized protein	-8.12065	6.94625	5.22565	Piscirickettsia salmonis LF-89 = ATCC VR-1361.	Bacteria; Proteobacteria; Gammaproteobacteria; Thiotrichales;Piscirickettsiaceae; Piscirickettsia.	1227812	PSLF89_2414	chromosome	hypothetical protein	hypothetical protein [Piscirickettsia salmonis]_x0001_gb|KGP94471.1| hypothetical protein KU39_03162 [Piscirickettsia salmonis]	No orthologs found
A0A0J1M585	ORFNames=AB894_01600, PSLF89_2446	GntR family transcriptional regulator	-5.73269	6.55654	3.125	Piscirickettsia salmonis LF-89 = ATCC VR-1361.	Bacteria; Proteobacteria; Gammaproteobacteria; Thiotrichales;Piscirickettsiaceae; Piscirickettsia.	1227812	PSLF89_2446	chromosome	GntR family transcriptional regulator	hypothetical protein [Piscirickettsia salmonis]_x0001_gb|KGP95892.1| bacterial regulatory s, gntR family protein [Piscirickettsia salmonis]	KE
U4TJV1	K661_01732	Enoyl-CoA hydratase/isomerase family protein	-6.83	6.33941	10.1167	Piscirickettsia salmonis LF-89 = ATCC VR-1361.	Bacteria; Proteobacteria; Gammaproteobacteria; Thiotrichales;Piscirickettsiaceae; Piscirickettsia.	1227812	PSLF89_2448	chromosome	enoyl-CoA hydratase	enoyl-CoA hydratase [Piscirickettsia salmonis]_x0001_gb|KGP95890.1| enoyl-CoA hydratase [Piscirickettsia salmonis]	I
U4TIR2	K661_01827	Acyl-CoA dehydrogenase, C-terminal domain protein	-4.1324	6.95956	2.47219	Piscirickettsia salmonis LF-89 = ATCC VR-1361.	Bacteria; Proteobacteria; Gammaproteobacteria; Thiotrichales;Piscirickettsiaceae; Piscirickettsia.	1227812	PSLF89_2454	chromosome	acyl-CoA dehydrogenase	acyl-CoA dehydrogenase [Piscirickettsia salmonis]	I
A0A0J1JFD6	AB894_01555	3-hydroxyacyl-CoA dehydrogenase	-5.30645	6.29927	3.11688	Piscirickettsia salmonis LF-89 = ATCC VR-1361.	Bacteria; Proteobacteria; Gammaproteobacteria; Thiotrichales;Piscirickettsiaceae; Piscirickettsia.	1227812	PSLF89_2457	chromosome	3-hydroxyacyl-CoA dehydrogenase	enoyl-CoA hydratase/isomerase family protein [Piscirickettsia salmonis]	I
A0A0H4R2M6	lolD	Lipoprotein-releasing system ATP-binding protein LolD	-6.47195	6.56643	9.12863	Piscirickettsia salmonis LF-89 = ATCC VR-1361.	Bacteria; Proteobacteria; Gammaproteobacteria; Thiotrichales;Piscirickettsiaceae; Piscirickettsia.	1227812	PSLF89_2468	chromosome	lipoprotein ABC transporter ATP-binding protein	lipoprotein ABC transporter ATP-binding protein [Piscirickettsia salmonis]	M	(gi:194097927) fbpC (NGK_0348) - Fe(3+) ions import ATP-binding protein fbpC [Neisseria gonorrhoeae str. NCCP11945]	Metal uptake and heme acquisition
U4TDV8	K661_01304	Uncharacterized protein	-4.08734	6.23141	4.07674	Piscirickettsia salmonis LF-89 = ATCC VR-1361.	Bacteria; Proteobacteria; Gammaproteobacteria; Thiotrichales;Piscirickettsiaceae; Piscirickettsia.	1227812	PSLF89_2472	chromosome	hypothetical protein	hypothetical protein [Piscirickettsia salmonis]_x0001_gb|KGP95184.1| hypothetical protein KU39_02631 [Piscirickettsia salmonis]	No orthologs found
U4TFM6	uvrB	UvrABC system protein B	-4.90841	6.48804	5.89124	Piscirickettsia salmonis LF-89 = ATCC VR-1361.	Bacteria; Proteobacteria; Gammaproteobacteria; Thiotrichales;Piscirickettsiaceae; Piscirickettsia.	1227812	PSLF89_2473	chromosome	transcription-repair coupling factor	transcription-repair coupling factor [Piscirickettsia salmonis]_x0001_gb|KGP95183.1| transcription-repair coupling factor [Piscirickettsia salmonis]	LK
U4TB18	dcd	Deoxycytidine triphosphate deaminase	-5.59351	6.12623	16.4894	Piscirickettsia salmonis LF-89 = ATCC VR-1361.	Bacteria; Proteobacteria; Gammaproteobacteria; Thiotrichales;Piscirickettsiaceae; Piscirickettsia.	1227812	PSLF89_2482	chromosome	deoxycytidine triphosphate deaminase	deoxycytidine triphosphate deaminase [Piscirickettsia salmonis]_x0001_gb|KGP94419.1| deoxycytidine triphosphate deaminase [Piscirickettsia salmonis]	F	**
U4T7V5	K661_02900	Uncharacterized protein	-5.54256	5.88698	6.95187	Piscirickettsia salmonis LF-89 = ATCC VR-1361.	Bacteria; Proteobacteria; Gammaproteobacteria; Thiotrichales;Piscirickettsiaceae; Piscirickettsia.	1227812	PSLF89_2495	chromosome	hypothetical protein	hypothetical protein [Piscirickettsia salmonis]_x0001_gb|KGP94183.1| ras family protein [Piscirickettsia salmonis]	No orthologs found
U4TJY1	K661_01705	Uncharacterized protein	-4.27676	6.20848	1.89873	Piscirickettsia salmonis LF-89 = ATCC VR-1361.	Bacteria; Proteobacteria; Gammaproteobacteria; Thiotrichales;Piscirickettsiaceae; Piscirickettsia.	1227812	PSLF89_2499	chromosome	hypothetical protein	hypothetical protein [Piscirickettsia salmonis]_x0001_gb|KGP95006.1| ATP-dependent protease [Piscirickettsia salmonis]	No orthologs found
U4TH90	K661_00120	Acylphosphatase	-4.00886	6.21005	23.9437	Piscirickettsia salmonis LF-89 = ATCC VR-1361.	Bacteria; Proteobacteria; Gammaproteobacteria; Thiotrichales;Piscirickettsiaceae; Piscirickettsia.	1227812	PSLF89_25	chromosome	acylphosphatase		C
U4TJN2	K661_00010	Uncharacterized protein	-5.34744	6.78533	3.07692	Piscirickettsia salmonis LF-89 = ATCC VR-1361.	Bacteria; Proteobacteria; Gammaproteobacteria; Thiotrichales;Piscirickettsiaceae; Piscirickettsia.	1227812	PSLF89_252	chromosome	hypothetical protein	hypothetical protein [Piscirickettsia salmonis]_x0001_gb|KGP98420.1| hypothetical protein KU39_00135 [Piscirickettsia salmonis]	No orthologs found
A0A0H4R276	PSLF89_2521	tRNA-processing RNAse BN	-4.44684	6.18045	3.8835	Piscirickettsia salmonis LF-89 = ATCC VR-1361.	Bacteria; Proteobacteria; Gammaproteobacteria; Thiotrichales;Piscirickettsiaceae; Piscirickettsia.	1227812	PSLF89_2521	chromosome	hypothetical protein	membrane protein [Piscirickettsia salmonis]_x0001_gb|KGP95674.1| membrane protein [Piscirickettsia salmonis]	K
A0A0H4R2S1	PSLF89_2525	Uncharacterized protein	-5.63879	8.53276	12.1019	Piscirickettsia salmonis LF-89 = ATCC VR-1361.	Bacteria; Proteobacteria; Gammaproteobacteria; Thiotrichales;Piscirickettsiaceae; Piscirickettsia.	1227812	PSLF89_2525	chromosome	hypothetical protein	hypothetical protein [Piscirickettsia salmonis]_x0001_gb|KGP95670.1| tyrosine kinase family protein [Piscirickettsia salmonis]	No orthologs found
A0A0H4RJG5	ORFNames=PSLF89_2378, PSLF89_2537	Uncharacterized protein	-6.36887	6.18641	26.9841	Piscirickettsia salmonis LF-89 = ATCC VR-1361.	Bacteria; Proteobacteria; Gammaproteobacteria; Thiotrichales;Piscirickettsiaceae; Piscirickettsia.	1227812	PSLF89_2537	chromosome	hypothetical protein	hypothetical protein [Piscirickettsia salmonis]	X
U4TGP5	flgL	Flagellar hook-associated protein 3	-4.34157	6.79329	2.80778	Piscirickettsia salmonis LF-89 = ATCC VR-1361.	Bacteria; Proteobacteria; Gammaproteobacteria; Thiotrichales;Piscirickettsiaceae; Piscirickettsia.	1227812	PSLF89_2548	chromosome	hypothetical protein	hypothetical protein [Piscirickettsia salmonis]_x0001_gb|KGP95622.1| flagellar hook-associated protein 3 [Piscirickettsia salmonis]	No orthologs found	(gi:26991069) flgL (PP_4380) - flagellar hook-associated protein FlgL [Pseudomonas putida str. KT2440]	Adhesins, adherence and adhesion-related proteins
A0A0H4R296	flgH	Flagellar L-ring protein	-4.39839	6.24128	8.11966	Piscirickettsia salmonis LF-89 = ATCC VR-1361.	Bacteria; Proteobacteria; Gammaproteobacteria; Thiotrichales;Piscirickettsiaceae; Piscirickettsia.	1227812	PSLF89_2552	chromosome	hypothetical protein	hypothetical protein [Piscirickettsia salmonis]_x0001_gb|KGP95626.1| flagellar L-ring family protein [Piscirickettsia salmonis]	N	(gi:152984579) flgH (PSPA7_4294) - flagellar L-ring protein precursor FlgH [Pseudomonas aeruginosa str. PA7]	Adhesins, adherence and adhesion-related proteins
A0A0H4R2V1	acs	Acetyl-CoA synthetase	-5.31334	6.43568	5.03049	Piscirickettsia salmonis LF-89 = ATCC VR-1361.	Bacteria; Proteobacteria; Gammaproteobacteria; Thiotrichales;Piscirickettsiaceae; Piscirickettsia.	1227812	PSLF89_2572	chromosome	acetyl-coenzyme A synthetase	acetyl-CoA synthetase [Piscirickettsia salmonis]_x0001_gb|KGP94982.1| acetyl-CoA synthetase [Piscirickettsia salmonis]	I
A0A0H4R2B9	PSLF89_2580	Uncharacterized protein	-4.54555	5.8207	2.9148	Piscirickettsia salmonis LF-89 = ATCC VR-1361.	Bacteria; Proteobacteria; Gammaproteobacteria; Thiotrichales;Piscirickettsiaceae; Piscirickettsia.	1227812	PSLF89_2580	chromosome	hypothetical protein	gluconokinase [Piscirickettsia salmonis]	No orthologs found
A0A0J1J8X3	ORFNames=AB894_13160, PSLF89_2605	Folate-binding protein YgfZ	-4.11762	5.95858	9.93976	Piscirickettsia salmonis LF-89 = ATCC VR-1361.	Bacteria; Proteobacteria; Gammaproteobacteria; Thiotrichales;Piscirickettsiaceae; Piscirickettsia.	1227812	PSLF89_2605	chromosome	hypothetical protein	hypothetical protein [Piscirickettsia salmonis]_x0001_gb|KGP98570.1| glycine cleavage T-C-terminal barrel domain protein [Piscirickettsia salmonis]	O
U4TN94	ORFNames=AB894_13335, AB894_14980	Bacterial DNA-binding family protein	-22.5274	7.84261	8.66142	Piscirickettsia salmonis LF-89 = ATCC VR-1361.	Bacteria; Proteobacteria; Gammaproteobacteria; Thiotrichales;Piscirickettsiaceae; Piscirickettsia.	1227812	PSLF89_2626	chromosome	DNA-binding protein	bacterial DNA-binding family protein [Piscirickettsia salmonis]_x0001_gb|ERL63373.1| bacterial DNA-binding family protein [Piscirickettsia salmonis LF-89 = ATCC VR-1361]_x0001_gb|KGP98613.1| bacterial DNA-binding family protein [Piscirickettsia salmonis]_x0001_gb|KGQ00603.1| bacterial DNA-binding family protein [Piscirickettsia salmonis]	L
A0A0J1J8S4	radA	DNA repair protein radA	-4.88732	6.57523	5.92105	Piscirickettsia salmonis LF-89 = ATCC VR-1361.	Bacteria; Proteobacteria; Gammaproteobacteria; Thiotrichales;Piscirickettsiaceae; Piscirickettsia.	1227812	PSLF89_2629	chromosome	DNA repair protein RadA	DNA repair protein RadA [Piscirickettsia salmonis]_x0001_gb|AAG16998.1|AF184152_1 DNA repair enzyme RadA [Piscirickettsia salmonis]_x0001_gb|KGP98615.1| DNA repair protein RadA [Piscirickettsia salmonis]	O
U4TNB9	K661_00225	GAF domain protein	-24.7145	8.48623	21.6049	Piscirickettsia salmonis LF-89 = ATCC VR-1361.	Bacteria; Proteobacteria; Gammaproteobacteria; Thiotrichales;Piscirickettsiaceae; Piscirickettsia.	1227812	PSLF89_2637	chromosome	histidine kinase	histidine kinase [Piscirickettsia salmonis]_x0001_gb|KGP98623.1| histidine kinase [Piscirickettsia salmonis]	VT
U4TJ38	aroB	3-dehydroquinate synthase	-5.51145	6.53026	5.46448	Piscirickettsia salmonis LF-89 = ATCC VR-1361.	Bacteria; Proteobacteria; Gammaproteobacteria; Thiotrichales;Piscirickettsiaceae; Piscirickettsia.	1227812	PSLF89_2638	chromosome	hypothetical protein	hypothetical protein [Piscirickettsia salmonis]	E
U4TJD2	K661_01577	DNA helicase	-10.4083	6.57486	3.08914	Piscirickettsia salmonis LF-89 = ATCC VR-1361.	Bacteria; Proteobacteria; Gammaproteobacteria; Thiotrichales;Piscirickettsiaceae; Piscirickettsia.	1227812	PSLF89_2661	chromosome	hypothetical protein	hypothetical protein [Piscirickettsia salmonis]_x0001_gb|KGP94932.1| uvrD/REP helicase N-terminal domain protein [Piscirickettsia salmonis]	L
A0A0J1JBI6	fliC	FliC	-4.39552	6.4793	4.49438	Piscirickettsia salmonis LF-89 = ATCC VR-1361.	Bacteria; Proteobacteria; Gammaproteobacteria; Thiotrichales;Piscirickettsiaceae; Piscirickettsia.	1227812	PSLF89_2667	chromosome	hypothetical protein	hypothetical protein [Piscirickettsia salmonis]_x0001_gb|KGP94324.1| flagellin [Piscirickettsia salmonis]	N		Motility and export apparatus
A0A0J1JBK7	ORFNames=AB894_08435, PSLF89_2668	Uncharacterized protein	-5.9963	6.5689	4.41989	Piscirickettsia salmonis LF-89 = ATCC VR-1361.	Bacteria; Proteobacteria; Gammaproteobacteria; Thiotrichales;Piscirickettsiaceae; Piscirickettsia.	1227812	PSLF89_2668	chromosome	hypothetical protein	hypothetical protein [Piscirickettsia salmonis]_x0001_gb|KGP94323.1| glycosyl transferase 41 family protein [Piscirickettsia salmonis]	No orthologs found
U4TJ57	folE2	GTP cyclohydrolase FolE2	-4.35308	6.78734	5.7971	Piscirickettsia salmonis LF-89 = ATCC VR-1361.	Bacteria; Proteobacteria; Gammaproteobacteria; Thiotrichales;Piscirickettsiaceae; Piscirickettsia.	1227812	PSLF89_2682	chromosome	GTP cyclohydrolase FolE2	GTP cyclohydrolase [Piscirickettsia salmonis]	H
A0A0J1M371	infB	Translation initiation factor IF-2	-6.06331	7.02431	2.0202	Piscirickettsia salmonis LF-89 = ATCC VR-1361.	Bacteria; Proteobacteria; Gammaproteobacteria; Thiotrichales;Piscirickettsiaceae; Piscirickettsia.	1227812	PSLF89_273	chromosome	translation initiation factor IF-2	translation initiation factor IF-2 [Piscirickettsia salmonis]_x0001_gb|KGP98439.1| translation initiation factor IF-2 [Piscirickettsia salmonis]	M
A0A0H4R589	PSLF89_2730	Methyl-accepting chemotaxis sensory transducer	-5.16194	6.35479	3.41656	Piscirickettsia salmonis LF-89 = ATCC VR-1361.	Bacteria; Proteobacteria; Gammaproteobacteria; Thiotrichales;Piscirickettsiaceae; Piscirickettsia.	1227812	PSLF89_2730	chromosome	chemotaxis protein	methyl-accepting chemotaxis (MCP) signaling domain protein [Piscirickettsia salmonis]	NT
U4TH47	K661_02371	Uncharacterized protein	-4.29837	6.11092	3.31825	Piscirickettsia salmonis LF-89 = ATCC VR-1361.	Bacteria; Proteobacteria; Gammaproteobacteria; Thiotrichales;Piscirickettsiaceae; Piscirickettsia.	1227812	PSLF89_2758	chromosome	hypothetical protein	hypothetical protein [Piscirickettsia salmonis]_x0001_gb|KGP95211.1| N-formylglutamate amidohydrolase [Piscirickettsia salmonis]	S
A0A0J1JC14	ORFNames=AB894_07335, PSLF89_2770	Uncharacterized protein	-7.71913	6.82814	10.0775	Piscirickettsia salmonis LF-89 = ATCC VR-1361.	Bacteria; Proteobacteria; Gammaproteobacteria; Thiotrichales;Piscirickettsiaceae; Piscirickettsia.	1227812	PSLF89_2770	chromosome	hypothetical protein	hypothetical protein [Piscirickettsia salmonis]	T	(gi:166154890) pkn5 (CTLon_0042) - putative serine/threonine-protein kinase (TTSS effector protein) [Chlamydia trachomatis str. UCH-1 (serovar L2b)]	Toxin, efector protein
A0A0H4RJY4	cheV	CheV	-5.03648	6.97755	11.0032	Piscirickettsia salmonis LF-89 = ATCC VR-1361.	Bacteria; Proteobacteria; Gammaproteobacteria; Thiotrichales;Piscirickettsiaceae; Piscirickettsia.	1227812	PSLF89_2776	chromosome	chemotaxis protein CheW	hypothetical protein [Piscirickettsia salmonis]_x0001_gb|KGP94222.1| response regulator [Piscirickettsia salmonis]	NT	(gi:147674785) cheV (VC0395_A1794) - chemotaxis protein CheV [Vibrio cholerae str. O395 chromosome II]	Chemotaxis
A0A0J1J969	ansA	Cytoplasmic asparaginase I	-5.29367	5.9404	10.5572	Piscirickettsia salmonis LF-89 = ATCC VR-1361.	Bacteria; Proteobacteria; Gammaproteobacteria; Thiotrichales;Piscirickettsiaceae; Piscirickettsia.	1227812	PSLF89_2817	chromosome	meta-pathway of phenol degradation family protein	meta-pathway of phenol degradation family protein [Piscirickettsia salmonis]_x0001_gb|KGP97747.1| meta-pathway of phenol degradation family protein [Piscirickettsia salmonis]	No orthologs found
U4TDZ8	K661_01253	Uncharacterized protein	-5.54368	6.33257	5.02092	Piscirickettsia salmonis LF-89 = ATCC VR-1361.	Bacteria; Proteobacteria; Gammaproteobacteria; Thiotrichales;Piscirickettsiaceae; Piscirickettsia.	1227812	PSLF89_2823	chromosome	hypothetical protein	hypothetical protein [Piscirickettsia salmonis]_x0001_gb|KGP97753.1| protein of unknown function DUF124 [Piscirickettsia salmonis]	S
A0A0J1JF25	AB894_01845	Diguanylate cyclase	-4.19743	7.69854	8.46906	Piscirickettsia salmonis LF-89 = ATCC VR-1361.	Bacteria; Proteobacteria; Gammaproteobacteria; Thiotrichales;Piscirickettsiaceae; Piscirickettsia.	1227812	PSLF89_2852	chromosome	diguanylate cyclase	diguanylate cyclase domain protein, partial [Piscirickettsia salmonis]	TK
A0A0J1JDP1	serC	Phosphoserine aminotransferase	-4.41095	6.35573	3.60111	Piscirickettsia salmonis LF-89 = ATCC VR-1361.	Bacteria; Proteobacteria; Gammaproteobacteria; Thiotrichales;Piscirickettsiaceae; Piscirickettsia.	1227812	PSLF89_2893	chromosome	3-phosphoserine/phosphohydroxythreonine aminotransferase	phosphoserine transaminase [Piscirickettsia salmonis]	HE
U4TH71	mtaD	5-methylthioadenosine/S-adenosylhomocysteine deaminase	-4.20726	7.06645	3.18907	Piscirickettsia salmonis LF-89 = ATCC VR-1361.	Bacteria; Proteobacteria; Gammaproteobacteria; Thiotrichales;Piscirickettsiaceae; Piscirickettsia.	1227812	PSLF89_2898	chromosome	N-ethylammeline chlorohydrolase	hypothetical protein [Piscirickettsia salmonis]_x0001_gb|KGP95123.1| amidohydrolase family protein [Piscirickettsia salmonis]	FR
A0A0H4R313	caD	Carbamoyl-phosphate synthase (glutamine-hydrolyzing)	-4.11995	8.34865	2.35627	Piscirickettsia salmonis LF-89 = ATCC VR-1361.	Bacteria; Proteobacteria; Gammaproteobacteria; Thiotrichales;Piscirickettsiaceae; Piscirickettsia.	1227812	PSLF89_2913	chromosome	carbamoyl phosphate synthase large subunit	carbamoyl phosphate synthase large subunit [Piscirickettsia salmonis]_x0001_gb|KGP94862.1| carbamoyl phosphate synthase large subunit [Piscirickettsia salmonis]	EF
U4TD64	pyrE	Orotate phosphoribosyltransferase	-4.06116	6.756	19.1011	Piscirickettsia salmonis LF-89 = ATCC VR-1361.	Bacteria; Proteobacteria; Gammaproteobacteria; Thiotrichales;Piscirickettsiaceae; Piscirickettsia.	1227812	PSLF89_2915	chromosome	orotate phosphoribosyltransferase	orotate phosphoribosyltransferase [Piscirickettsia salmonis]_x0001_gb|KGP94860.1| orotate phosphoribosyltransferase [Piscirickettsia salmonis]	F
U4TER5	K661_00976	Orotidine 5'-phosphate decarboxylase	-4.99739	7.12399	16.2055	Piscirickettsia salmonis LF-89 = ATCC VR-1361.	Bacteria; Proteobacteria; Gammaproteobacteria; Thiotrichales;Piscirickettsiaceae; Piscirickettsia.	1227812	PSLF89_2916	chromosome	orotidine 5'-phosphate decarboxylase	hypothetical protein [Piscirickettsia salmonis]_x0001_gb|KGP94859.1| uridine 5'-monophosphate synthase [Piscirickettsia salmonis]	F
A0A0H4R321	PSLF89_2926	Uncharacterized protein	-4.56875	7.55662	1.15132	Piscirickettsia salmonis LF-89 = ATCC VR-1361.	Bacteria; Proteobacteria; Gammaproteobacteria; Thiotrichales;Piscirickettsiaceae; Piscirickettsia.	1227812	PSLF89_2926	chromosome	hypothetical protein	hypothetical protein [Piscirickettsia salmonis]_x0001_gb|KGP94663.1| putative membrane protein [Piscirickettsia salmonis]	No orthologs found
A0A0J1JC98	metG	Methionine--tRNA ligase	-4.38235	6.21048	3.20233	Piscirickettsia salmonis LF-89 = ATCC VR-1361.	Bacteria; Proteobacteria; Gammaproteobacteria; Thiotrichales;Piscirickettsiaceae; Piscirickettsia.	1227812	PSLF89_2928	chromosome	methionine--tRNA ligase	methionine--tRNA ligase [Piscirickettsia salmonis]_x0001_gb|KGP94661.1| methionine--tRNA ligase [Piscirickettsia salmonis]	J
A0A0H4R3M7	nth	Endonuclease III	-4.41395	7.37868	8.57143	Piscirickettsia salmonis LF-89 = ATCC VR-1361.	Bacteria; Proteobacteria; Gammaproteobacteria; Thiotrichales;Piscirickettsiaceae; Piscirickettsia.	1227812	PSLF89_2930	chromosome	endonuclease III	hypothetical protein [Piscirickettsia salmonis]_x0001_gb|KGP94659.1| endonuclease III [Piscirickettsia salmonis]_x0001_gb|KGP96039.1| endonuclease III [Piscirickettsia salmonis]	L
A0A0J1J883	AB894_14580	Uncharacterized protein	-5.28004	6.68028	15.3061	Piscirickettsia salmonis LF-89 = ATCC VR-1361.	Bacteria; Proteobacteria; Gammaproteobacteria; Thiotrichales;Piscirickettsiaceae; Piscirickettsia.	1227812	PSLF89_2935	chromosome	hypothetical protein	ankyrin repeat family protein [Piscirickettsia salmonis]_x0001_gb|ERL61390.1| ankyrin repeat family protein [Piscirickettsia salmonis LF-89= ATCC VR-1361]	No orthologs found
A0A0H4QXX1	fabG	FabG	-4.56996	6.03458	6.00858	Piscirickettsia salmonis LF-89 = ATCC VR-1361.	Bacteria; Proteobacteria; Gammaproteobacteria; Thiotrichales;Piscirickettsiaceae; Piscirickettsia.	1227812	PSLF89_295	chromosome	3-ketoacyl-ACP reductase	3-ketoacyl-ACP reductase [Piscirickettsia salmonis]_x0001_gb|KGP98050.1| 3-ketoacyl-ACP reductase [Piscirickettsia salmonis]_x0001_gb|KGP98460.1| 3-ketoacyl-ACP reductase [Piscirickettsia salmonis]	IQR	(gi:76787982) cylG (SAK_0792) - cylG protein [Streptococcus agalactiae str. A909 (serotype Ia)]	Toxin, efector protein
U4TF02	K661_03111	Uncharacterized protein	-12.4697	6.82411	13.1148	Piscirickettsia salmonis LF-89 = ATCC VR-1361.	Bacteria; Proteobacteria; Gammaproteobacteria; Thiotrichales;Piscirickettsiaceae; Piscirickettsia.	1227812	PSLF89_2965	chromosome	hypothetical protein	hypothetical protein [Piscirickettsia salmonis]_x0001_gb|KGP95141.1| OspB [Piscirickettsia salmonis]	No orthologs found
A0A0J1M422	purM	Phosphoribosylformylglycinamidine cyclo-ligase	-6.93291	6.10022	4.26136	Piscirickettsia salmonis LF-89 = ATCC VR-1361.	Bacteria; Proteobacteria; Gammaproteobacteria; Thiotrichales;Piscirickettsiaceae; Piscirickettsia.	1227812	PSLF89_2968	chromosome	phosphoribosylaminoimidazole synthetase	phosphoribosylaminoimidazole synthetase [Piscirickettsia salmonis]	F
A0A0J1J803	ORFNames=AB894_15250, PSLF89_297	Uncharacterized protein	-4.00777	6.6092	15.3846	Piscirickettsia salmonis LF-89 = ATCC VR-1361.	Bacteria; Proteobacteria; Gammaproteobacteria; Thiotrichales;Piscirickettsiaceae; Piscirickettsia.	1227812	PSLF89_297	chromosome	hypothetical protein	hypothetical protein [Piscirickettsia salmonis]_x0001_gb|KGP98048.1| nitrate ABC transporter ATPase [Piscirickettsia salmonis]	No orthologs found
U4T8G8	K661_03215	Uncharacterized protein	-4.39932	6.74883	3.71901	Piscirickettsia salmonis LF-89 = ATCC VR-1361.	Bacteria; Proteobacteria; Gammaproteobacteria; Thiotrichales;Piscirickettsiaceae; Piscirickettsia.	1227812	PSLF89_2980	chromosome	hypothetical protein	hypothetical protein KU39_00575 [Piscirickettsia salmonis]	No orthologs found
U4TEE4	K661_01897	Uncharacterized protein	-5.92756	5.95889	15.8416	Piscirickettsia salmonis LF-89 = ATCC VR-1361.	Bacteria; Proteobacteria; Gammaproteobacteria; Thiotrichales;Piscirickettsiaceae; Piscirickettsia.	1227812	PSLF89_2p12	pPSLF89-2	hypothetical protein	purine or other phosphorylase family 1 [Piscirickettsia salmonis]	No orthologs found
A0A0J1J7G5	AB894_15695	Phage major capsid protein, HK97 family	-4.82335	7.29147	16.2162	Piscirickettsia salmonis LF-89 = ATCC VR-1361.	Bacteria; Proteobacteria; Gammaproteobacteria; Thiotrichales;Piscirickettsiaceae; Piscirickettsia.	1227812	PSLF89_2p22	pPSLF89-2	phage capsid protein	phage major capsid protein, HK97 family [Piscirickettsia salmonis]_x0001_gb|KGP95653.1| phage major capsid protein, HK97 family [Piscirickettsia salmonis]	X
U4TCF2	K661_01261	Uncharacterized protein	-4.65526	9.13892	25.641	Piscirickettsia salmonis LF-89 = ATCC VR-1361.	Bacteria; Proteobacteria; Gammaproteobacteria; Thiotrichales;Piscirickettsiaceae; Piscirickettsia.	1227812	PSLF89_2p31	pPSLF89-2	hypothetical protein	phage tail family protein [Piscirickettsia salmonis]	X
U4T8B8	ORFNames=AB894_06330, K661_03267	Phage integrase family protein	-4.01027	6.47924	9.69388	Piscirickettsia salmonis LF-89 = ATCC VR-1361.	Bacteria; Proteobacteria; Gammaproteobacteria; Thiotrichales;Piscirickettsiaceae; Piscirickettsia.	1227812	PSLF89_2p8	pPSLF89-2	hypothetical protein	phage integrase family protein [Piscirickettsia salmonis]_x0001_gb|ERL60409.1| phage integrase family protein [Piscirickettsia salmonis LF-89= ATCC VR-1361]_x0001_gb|KGP93938.1| phage integrase family protein [Piscirickettsia salmonis]	LX
U4TDI1	hemA	Glutamyl-tRNA reductase	-4.47327	6.84479	3.57995	Piscirickettsia salmonis LF-89 = ATCC VR-1361.	Bacteria; Proteobacteria; Gammaproteobacteria; Thiotrichales;Piscirickettsiaceae; Piscirickettsia.	1227812	PSLF89_3001	chromosome	glutamyl-tRNA reductase	hypothetical protein [Piscirickettsia salmonis]_x0001_gb|KGP95327.1| glutamyl-tRNA reductase [Piscirickettsia salmonis]	H	(gi:170717508) hemA (HSM_1279) - Glutamyl-tRNA reductase [Haemophilus somnus str. 2336]	Metal uptake and heme acquisition
A0A0H4R3S0	mtn	5'-methylthioadenosine/S-adenosylhomocysteine nucleosidase 2	-4.85179	7.07484	18.5654	Piscirickettsia salmonis LF-89 = ATCC VR-1361.	Bacteria; Proteobacteria; Gammaproteobacteria; Thiotrichales;Piscirickettsiaceae; Piscirickettsia.	1227812	PSLF89_3008	chromosome	nucleosidase	hypothetical protein [Piscirickettsia salmonis]_x0001_gb|KGP95334.1| MTA/SAH nucleosidase [Piscirickettsia salmonis]	F	**
U4TDH6	K661_01395	Methyltransferase domain protein	-10.4291	6.54007	18.9781	Piscirickettsia salmonis LF-89 = ATCC VR-1361.	Bacteria; Proteobacteria; Gammaproteobacteria; Thiotrichales;Piscirickettsiaceae; Piscirickettsia.	1227812	PSLF89_3009	chromosome	methyltransferase	methyltransferase [Piscirickettsia salmonis]	H	(gi:15826961) ML0130 - hypothetical protein [Mycobacterium leprae str. TN]	Cell surface components
U4T8V4	K661_02506	Helix-turn-helix family protein	-4.00962	6.91124	8	Piscirickettsia salmonis LF-89 = ATCC VR-1361.	Bacteria; Proteobacteria; Gammaproteobacteria; Thiotrichales;Piscirickettsiaceae; Piscirickettsia.	1227812	PSLF89_3017	chromosome	hypothetical protein	hypothetical protein [Piscirickettsia salmonis]_x0001_gb|KGP94043.1| peptidase S24-like family protein [Piscirickettsia salmonis]	No orthologs found
A0A0J1JEW3	gcvT	Aminomethyltransferase	-4.06412	6.42639	10.3542	Piscirickettsia salmonis LF-89 = ATCC VR-1361.	Bacteria; Proteobacteria; Gammaproteobacteria; Thiotrichales;Piscirickettsiaceae; Piscirickettsia.	1227812	PSLF89_3028	chromosome	glycine cleavage system protein T	hypothetical protein [Piscirickettsia salmonis]_x0001_gb|KGP97332.1| glycine cleavage system T protein [Piscirickettsia salmonis]	E
A0A0H4RKI9	glnE	Glutamate-ammonia-ligase adenylyltransferase	-4.4673	7.86597	1.65289	Piscirickettsia salmonis LF-89 = ATCC VR-1361.	Bacteria; Proteobacteria; Gammaproteobacteria; Thiotrichales;Piscirickettsiaceae; Piscirickettsia.	1227812	PSLF89_3035	chromosome	hypothetical protein	glnD PII-uridylyltransferase family protein [Piscirickettsia salmonis]	O
A0A0H4R3U5	ydiJ	Uncharacterized protein	-4.4749	6.12218	2.74669	Piscirickettsia salmonis LF-89 = ATCC VR-1361.	Bacteria; Proteobacteria; Gammaproteobacteria; Thiotrichales;Piscirickettsiaceae; Piscirickettsia.	1227812	PSLF89_3041	chromosome	hypothetical protein	hypothetical protein [Piscirickettsia salmonis]_x0001_gb|KGP97318.1| 4Fe-4S dicluster domain protein [Piscirickettsia salmonis]	C
U4TLZ8	ORFNames=AB894_05040, K661_00698	Transcriptional regulator PhoB	-4.82044	7.08551	4.66102	Piscirickettsia salmonis LF-89 = ATCC VR-1361.	Bacteria; Proteobacteria; Gammaproteobacteria; Thiotrichales;Piscirickettsiaceae; Piscirickettsia.	1227812	PSLF89_3050	chromosome	two-component system response regulator	two-component transcriptional regulatory family protein [Piscirickettsia salmonis]_x0001_gb|ERL62943.1| two-component transcriptional regulatory family protein [Piscirickettsia salmonis LF-89 = ATCC VR-1361]_x0001_gb|KGP93826.1| two-component transcriptional regulatory family protein [Piscirickettsia salmonis]_x0001_gb|KGP94305.1| two-component transcriptional regulatory family protein [Piscirick…	TK	(gi:379760345) prrA (OCQ_09080) - two component response transcriptional regulatory protein prra [Mycobacterium intracellulare str. MOTT 64]	Regulation
A0A0H4R399	fabF	FabF	-9.26015	7.32577	5.31646	Piscirickettsia salmonis LF-89 = ATCC VR-1361.	Bacteria; Proteobacteria; Gammaproteobacteria; Thiotrichales;Piscirickettsiaceae; Piscirickettsia.	1227812	PSLF89_3066	chromosome	beta-ketoacyl-[acyl-carrier-protein] synthase II	beta-ketoacyl-acyl-carrier-protein synthase II [Piscirickettsia salmonis]_x0001_gb|ERL62439.1| beta-ketoacyl-acyl-carrier-protein synthase II [Piscirickettsia salmonis LF-89 = ATCC VR-1361]	IQ	(gi:333990289) kasB (JDM601_1649) - 3-oxoacyl-(acyl carrier protein) synthase II [Mycobacterium sp. str. JDM601]	Lipid and fatty acid metabolism
U4TGC9	phaC	Poly(R)-hydroxyalkanoic acid synthase, class I family protein	-11.2012	6.09874	3.11987	Piscirickettsia salmonis LF-89 = ATCC VR-1361.	Bacteria; Proteobacteria; Gammaproteobacteria; Thiotrichales;Piscirickettsiaceae; Piscirickettsia.	1227812	PSLF89_3075	chromosome	poly(3-hydroxyalkanoate) synthetase	hypothetical protein [Piscirickettsia salmonis]	I
A0A0J1J8C0	ORFNames=AB894_14190, PSLF89_3076	DNA replication terminus site-binding family protein	-8.09715	6.08554	13.4483	Piscirickettsia salmonis LF-89 = ATCC VR-1361.	Bacteria; Proteobacteria; Gammaproteobacteria; Thiotrichales;Piscirickettsiaceae; Piscirickettsia.	1227812	PSLF89_3076	chromosome	DNA replication terminus site-binding family protein	hypothetical protein [Piscirickettsia salmonis]	No orthologs found
A0A0J1J8G1	AB894_14170	OmpA family protein	-4.31986	6.00679	5.74324	Piscirickettsia salmonis LF-89 = ATCC VR-1361.	Bacteria; Proteobacteria; Gammaproteobacteria; Thiotrichales;Piscirickettsiaceae; Piscirickettsia.	1227812	PSLF89_3081	chromosome	cell envelope biogenesis protein OmpA	hypothetical protein [Piscirickettsia salmonis]_x0001_gb|KGP93583.1| ompA family protein, partial [Piscirickettsia salmonis]	M	(gi:118474477) cadF (CFF8240_0389) - outer membrane fibronectin-binding protein [Campylobacter fetus str. 82-40 (subsp. fetus)]	Adhesins, adherence and adhesion-related proteins
U4TF18	ORFNames=AB894_14120, K661_00275	Lipopolysaccharide assembly protein LptC	-4.80584	6.04302	10.2703	Piscirickettsia salmonis LF-89 = ATCC VR-1361.	Bacteria; Proteobacteria; Gammaproteobacteria; Thiotrichales;Piscirickettsiaceae; Piscirickettsia.	1227812	PSLF89_3091	chromosome	LPS export ABC transporter periplasmic protein LptC	lipopolysaccharide-assembly, LptC-related family protein [Piscirickettsia salmonis]_x0001_gb|ERL63321.1| lipopolysaccharide-assembly, LptC-related family protein [Piscirickettsia salmonis LF-89 = ATCC VR-1361]_x0001_gb|KGP94146.1| lipopolysaccharide-assembly, LptC-related family protein [Piscirickettsia salmonis]_x0001_gb|KGP95175.1| lipopolysaccharide-assembly, LptC-related family protein [Pisci…	M		Endotoxin
A0A0J1J8K4	AB894_14105	RNA polymerase sigma-54 factor	-5.28234	6.19238	7.14286	Piscirickettsia salmonis LF-89 = ATCC VR-1361.	Bacteria; Proteobacteria; Gammaproteobacteria; Thiotrichales;Piscirickettsiaceae; Piscirickettsia.	1227812	PSLF89_3094	chromosome	RNA polymerase sigma-54 factor	hypothetical protein [Piscirickettsia salmonis]_x0001_gb|KGP94143.1| RNA polymerase sigma-54 factor [Piscirickettsia salmonis]	K	**
U4TP77	ORFNames=AB894_14065, K661_00287	Uncharacterized protein	-5.39155	7.40051	16.3743	Piscirickettsia salmonis LF-89 = ATCC VR-1361.	Bacteria; Proteobacteria; Gammaproteobacteria; Thiotrichales;Piscirickettsiaceae; Piscirickettsia.	1227812	PSLF89_3102	chromosome	hypothetical protein	hypothetical protein [Piscirickettsia salmonis]_x0001_gb|ERL63337.1| hypothetical protein K661_00287 [Piscirickettsia salmonis LF-89= ATCC VR-1361]_x0001_gb|KGP94800.1| hypothetical protein KU39_02927 [Piscirickettsia salmonis]_x0001_gb|KGP96816.1| hypothetical protein KW89_02485 [Piscirickettsia salmonis]	No orthologs found
U4TN57	K661_00288	Uncharacterized protein	-4.64862	6.64767	6.28931	Piscirickettsia salmonis LF-89 = ATCC VR-1361.	Bacteria; Proteobacteria; Gammaproteobacteria; Thiotrichales;Piscirickettsiaceae; Piscirickettsia.	1227812	PSLF89_3103	chromosome	hypothetical protein	hypothetical protein [Piscirickettsia salmonis]_x0001_gb|KGP94799.1| type VI secretion protein [Piscirickettsia salmonis]	U		Secretion system
A0A0J1J8D4	ORFNames=AB894_14045, PSLF89_3106	Type VI secretion protein	-9.02227	6.23523	5.30612	Piscirickettsia salmonis LF-89 = ATCC VR-1361.	Bacteria; Proteobacteria; Gammaproteobacteria; Thiotrichales;Piscirickettsiaceae; Piscirickettsia.	1227812	PSLF89_3106	chromosome	type VI secretion protein	type VI secretion protein [Piscirickettsia salmonis]	U	(gi:229593385) PFLU6020 - hypothetical protein [Pseudomonas fluorescens str. SBW25]	Secretion system
A0A0J1J8D2	AB894_14035	Uncharacterized protein	-4.20353	6.09437	4.90798	Piscirickettsia salmonis LF-89 = ATCC VR-1361.	Bacteria; Proteobacteria; Gammaproteobacteria; Thiotrichales;Piscirickettsiaceae; Piscirickettsia.	1227812	PSLF89_3108	chromosome	hypothetical protein	hypothetical protein [Piscirickettsia salmonis]_x0001_gb|KGP94794.1| type VI secretion-associated protein [Piscirickettsia salmonis]	U		Secretion system
A0A0H4R3E4	apaH	Bis(5'-nucleosyl)-tetraphosphatase, symmetrical	-4.42049	6.0181	7.83582	Piscirickettsia salmonis LF-89 = ATCC VR-1361.	Bacteria; Proteobacteria; Gammaproteobacteria; Thiotrichales;Piscirickettsiaceae; Piscirickettsia.	1227812	PSLF89_3133	chromosome	diadenosine tetraphosphatase	hypothetical protein [Piscirickettsia salmonis]_x0001_gb|KGP93641.1| ApaH [Piscirickettsia salmonis]	T
A0A0H4R2G9	PSLF89_3151	Uncharacterized protein	-4.80734	5.90711	17.0732	Piscirickettsia salmonis LF-89 = ATCC VR-1361.	Bacteria; Proteobacteria; Gammaproteobacteria; Thiotrichales;Piscirickettsiaceae; Piscirickettsia.	1227812	PSLF89_3151	chromosome	hypothetical protein	hypothetical protein [Piscirickettsia salmonis]	KT
U4TME3	K661_00871	TrfA family protein	-4.32983	5.75067	7.03704	Piscirickettsia salmonis LF-89 = ATCC VR-1361.	Bacteria; Proteobacteria; Gammaproteobacteria; Thiotrichales;Piscirickettsiaceae; Piscirickettsia.	1227812	PSLF89_3161	chromosome	trfA family protein	trfA family protein [Piscirickettsia salmonis]	No orthologs found
A0A0J1JDS3	ORFNames=AB894_04465, PSLF89_3169	Transcriptional regulator	-4.77747	7.49947	11.6883	Piscirickettsia salmonis LF-89 = ATCC VR-1361.	Bacteria; Proteobacteria; Gammaproteobacteria; Thiotrichales;Piscirickettsiaceae; Piscirickettsia.	1227812	PSLF89_3169	chromosome	two-component system response regulator	hypothetical protein [Piscirickettsia salmonis]_x0001_gb|KGP97413.1| two-component transcriptional regulatory family protein [Piscirickettsia salmonis]	TK	(gi:118468513) prrA (MSMEG_5662) - DNA-binding response regulator PrrA [Mycobacterium smegmatis str. MC2 155]	Regulation
A0A0H4R442	pepP	PepP	-4.06407	8.10357	5.79399	Piscirickettsia salmonis LF-89 = ATCC VR-1361.	Bacteria; Proteobacteria; Gammaproteobacteria; Thiotrichales;Piscirickettsiaceae; Piscirickettsia.	1227812	PSLF89_3175	chromosome	Xaa-Pro aminopeptidase	aminopeptidase P, N-terminal domain protein [Piscirickettsia salmonis]	E
U4THY6	purD	Phosphoribosylamine--glycine ligase	-4.03298	5.86633	9.45626	Piscirickettsia salmonis LF-89 = ATCC VR-1361.	Bacteria; Proteobacteria; Gammaproteobacteria; Thiotrichales;Piscirickettsiaceae; Piscirickettsia.	1227812	PSLF89_3176	chromosome	phosphoribosylamine--glycine ligase	hypothetical protein [Piscirickettsia salmonis]_x0001_gb|KGP97407.1| phosphoribosylamine--glycine ligase [Piscirickettsia salmonis]	F
A0A0J1JDM3	purH	Bifunctional purine biosynthesis protein PurH	-4.30323	7.59608	3.50195	Piscirickettsia salmonis LF-89 = ATCC VR-1361.	Bacteria; Proteobacteria; Gammaproteobacteria; Thiotrichales;Piscirickettsiaceae; Piscirickettsia.	1227812	PSLF89_3177	chromosome	bifunctional phosphoribosylaminoimidazolecarboxamide formyltransferase/inosine monophosphate cyclohydrolase	IMP cyclohydrolase [Piscirickettsia salmonis]_x0001_gb|KGP97406.1| IMP cyclohydrolase [Piscirickettsia salmonis]	F	**
A0A0J1JDI6	groEL	60 kDa chaperonin	-15.1553	6.3065	3.4358	Piscirickettsia salmonis LF-89 = ATCC VR-1361.	Bacteria; Proteobacteria; Gammaproteobacteria; Thiotrichales;Piscirickettsiaceae; Piscirickettsia.	1227812	PSLF89_3185	chromosome	molecular chaperone GroEL	molecular chaperone GroEL [Piscirickettsia salmonis]_x0001_gb|KGP97398.1| molecular chaperone GroEL [Piscirickettsia salmonis]	O	(gi:52840925) htpB (lpg0688) - Hsp60, 60K heat shock protein HtpB [Legionella pneumophila str. Philadelphia 1]	Adhesins, adherence and adhesion-related proteins
U4TFQ0	K661_03133	Uncharacterized protein	-5.73332	6.07962	8.87574	Piscirickettsia salmonis LF-89 = ATCC VR-1361.	Bacteria; Proteobacteria; Gammaproteobacteria; Thiotrichales;Piscirickettsiaceae; Piscirickettsia.	1227812	PSLF89_319	chromosome	ATP-NAD kinase	ATP-NAD kinase [Piscirickettsia salmonis]_x0001_gb|KGP98482.1| ATP-NAD kinase [Piscirickettsia salmonis]	F
A0A0J1JDU0	glmM	Phosphoglucosamine mutase	-7.59699	6.71616	6.96629	Piscirickettsia salmonis LF-89 = ATCC VR-1361.	Bacteria; Proteobacteria; Gammaproteobacteria; Thiotrichales;Piscirickettsiaceae; Piscirickettsia.	1227812	PSLF89_3191	chromosome	phosphoglucosamine mutase	phosphoglucosamine mutase [Piscirickettsia salmonis]	G	(gi:113460873) mrsA/glmM (HS_0730) - phosphoglucosamine mutase [Haemophilus somnus str. 129PT]	Host immune evasion, molecular mimicry
A0A0H4R6F3	hflB	ATP-dependent zinc metalloprotease FtsH	-9.67733	6.97828	4.09091	Piscirickettsia salmonis LF-89 = ATCC VR-1361.	Bacteria; Proteobacteria; Gammaproteobacteria; Thiotrichales;Piscirickettsiaceae; Piscirickettsia.	1227812	PSLF89_3192	chromosome	ATP-dependent metalloprotease	ATP-dependent metalloprotease [Piscirickettsia salmonis]	O
A0A0H4R2L3	PSLF89_3198	Uncharacterized protein	-4.51322	6.08073	33.8235	Piscirickettsia salmonis LF-89 = ATCC VR-1361.	Bacteria; Proteobacteria; Gammaproteobacteria; Thiotrichales;Piscirickettsiaceae; Piscirickettsia.	1227812	PSLF89_3198	chromosome	hypothetical protein	lipopolysaccharide kinase family protein [Piscirickettsia salmonis]	M		Endotoxin
A0A0J1JCV2	dnaK	Chaperone protein DnaK	-5.16388	5.79919	3.26087	Piscirickettsia salmonis LF-89 = ATCC VR-1361.	Bacteria; Proteobacteria; Gammaproteobacteria; Thiotrichales;Piscirickettsiaceae; Piscirickettsia.	1227812	PSLF89_321	chromosome	molecular chaperone DnaK	chaperone protein DnaK [Piscirickettsia salmonis]_x0001_gb|KGP98484.1| molecular chaperone DnaK [Piscirickettsia salmonis]	O
A0A0H4R3L1	purU	Formyltetrahydrofolate deformylase	-4.38579	6.58666	13.6054	Piscirickettsia salmonis LF-89 = ATCC VR-1361.	Bacteria; Proteobacteria; Gammaproteobacteria; Thiotrichales;Piscirickettsiaceae; Piscirickettsia.	1227812	PSLF89_3222	chromosome	formyltetrahydrofolate deformylase	formyltetrahydrofolate deformylase [Piscirickettsia salmonis]	F
U4TEK6	uvrD	DNA helicase	-4.55976	8.31825	2.32877	Piscirickettsia salmonis LF-89 = ATCC VR-1361.	Bacteria; Proteobacteria; Gammaproteobacteria; Thiotrichales;Piscirickettsiaceae; Piscirickettsia.	1227812	PSLF89_3227	chromosome	DNA helicase II	hypothetical protein [Piscirickettsia salmonis]	L
A0A0J1JEJ1	AB894_02845	D-alanyl-D-alanine carboxypeptidase	-4.14252	6.65509	5.02092	Piscirickettsia salmonis LF-89 = ATCC VR-1361.	Bacteria; Proteobacteria; Gammaproteobacteria; Thiotrichales;Piscirickettsiaceae; Piscirickettsia.	1227812	PSLF89_3231	chromosome	D-alanyl-D-alanine carboxypeptidase	D-alanyl-D-alanine carboxypeptidase [Piscirickettsia salmonis]_x0001_gb|KGP95561.1| D-alanyl-D-alanine carboxypeptidase/D-alanyl-D-alanine-endopeptidase[Piscirickettsia salmonis]	M		Endotoxin
A0A0J1JBN2	ORFNames=AB894_08215, PSLF89_3264	Ankryin	-5.31471	5.75709	9.77011	Piscirickettsia salmonis LF-89 = ATCC VR-1361.	Bacteria; Proteobacteria; Gammaproteobacteria; Thiotrichales;Piscirickettsiaceae; Piscirickettsia.	1227812	PSLF89_3264	chromosome	ankryin	hypothetical protein [Piscirickettsia salmonis]_x0001_gb|KGP98152.1| ankyrin repeat family protein [Piscirickettsia salmonis]	No orthologs found
U4TIR4	K661_00365	Undecaprenyl-phosphate glucose phosphotransferase	-4.47956	5.99685	3.24675	Piscirickettsia salmonis LF-89 = ATCC VR-1361.	Bacteria; Proteobacteria; Gammaproteobacteria; Thiotrichales;Piscirickettsiaceae; Piscirickettsia.	1227812	PSLF89_3280	chromosome	undecaprenyl-phosphate glucose phosphotransferase	hypothetical protein [Piscirickettsia salmonis]_x0001_gb|KGP98169.1| undecaprenyl-phosphate glucose phosphotransferase [Piscirickettsia salmonis]	M	(gi:27367928) cpsA (VV2_1582) - Sugar transferase involved in lipopolysaccharide synthesis [Vibrio vulnificus str. CMCP6 chromosome II]	Antiphagocytosis, capsule
A0A0H4R4D8	wcaG	Polysaccharide biosynthesis family protein	-4.14579	7.33084	5.19481	Piscirickettsia salmonis LF-89 = ATCC VR-1361.	Bacteria; Proteobacteria; Gammaproteobacteria; Thiotrichales;Piscirickettsiaceae; Piscirickettsia.	1227812	PSLF89_3283	chromosome	polysaccharide biosynthesis family protein	group 1 glycosyl transferase [Piscirickettsia salmonis]_x0001_gb|KGP98172.1| group 1 glycosyl transferase [Piscirickettsia salmonis]	M	(gi:218890650) PLES_19101 - wbpP [Pseudomonas aeruginosa str. LESB58]	Endotoxin
A0A0H4RL43	ORFNames=AB894_08340, PSLF89_3286	Glycosyltransferase	-6.10871	6.22869	9.18728	Piscirickettsia salmonis LF-89 = ATCC VR-1361.	Bacteria; Proteobacteria; Gammaproteobacteria; Thiotrichales;Piscirickettsiaceae; Piscirickettsia.	1227812	PSLF89_3286	chromosome	hypothetical protein	hypothetical protein [Piscirickettsia salmonis]_x0001_gb|KGP98175.1| glycosyl transferase 2 family protein [Piscirickettsia salmonis]	G	(gi:146320426) SSU98_0579 - Glycosyltransferases involved in cell wall biogenesis [Streptococcus suis str. 98HAH33]	Antiphagocytosis, capsule
A0A0J1JBL7	AB894_08350	Polysaccharide biosynthesis family protein	-4.29572	6.01655	5.49738	Piscirickettsia salmonis LF-89 = ATCC VR-1361.	Bacteria; Proteobacteria; Gammaproteobacteria; Thiotrichales;Piscirickettsiaceae; Piscirickettsia.	1227812	PSLF89_3288	chromosome	polysaccharide biosynthesis family protein	hypothetical protein [Piscirickettsia salmonis]	M
A0A0H4RL55	PSLF89_3296	Phosphoesterase, PAP2 family	-5.99387	6.42182	9.66184	Piscirickettsia salmonis LF-89 = ATCC VR-1361.	Bacteria; Proteobacteria; Gammaproteobacteria; Thiotrichales;Piscirickettsiaceae; Piscirickettsia.	1227812	PSLF89_3296	chromosome	hypothetical protein	PAP2 superfamily protein [Piscirickettsia salmonis]	I
U4TIS9	K661_02078	Putative NAD-dependent malic enzyme 2	-4.11032	6.31968	3.47826	Piscirickettsia salmonis LF-89 = ATCC VR-1361.	Bacteria; Proteobacteria; Gammaproteobacteria; Thiotrichales;Piscirickettsiaceae; Piscirickettsia.	1227812	PSLF89_3304	chromosome	NAD-dependent malic enzyme	hypothetical protein [Piscirickettsia salmonis]_x0001_gb|KGP96460.1| putative NAD-dependent malic enzyme 2 [Piscirickettsia salmonis]	C
U4TBL7	hemE	Uroporphyrinogen decarboxylase	-5.60857	6.85779	7.10227	Piscirickettsia salmonis LF-89 = ATCC VR-1361.	Bacteria; Proteobacteria; Gammaproteobacteria; Thiotrichales;Piscirickettsiaceae; Piscirickettsia.	1227812	PSLF89_3305	chromosome	uroporphyrinogen decarboxylase	hypothetical protein [Piscirickettsia salmonis]_x0001_gb|KGP96461.1| uroporphyrinogen decarboxylase [Piscirickettsia salmonis]_x0001_gb|KGP99133.1| uroporphyrinogen decarboxylase [Piscirickettsia salmonis]	H	(gi:170718716) hemE (HSM_0564) - uroporphyrinogen decarboxylase [Haemophilus somnus str. 2336]	Metal uptake and heme acquisition
U4TJJ3	rdgB	Non-canonical purine NTP pyrophosphatase	-5.16329	7.60949	13.9303	Piscirickettsia salmonis LF-89 = ATCC VR-1361.	Bacteria; Proteobacteria; Gammaproteobacteria; Thiotrichales;Piscirickettsiaceae; Piscirickettsia.	1227812	PSLF89_3321	chromosome	non-canonical purine NTP pyrophosphatase	hypothetical protein [Piscirickettsia salmonis]_x0001_gb|KGP96477.1| non-canonical purine NTP pyrophosphatase, RdgB/HAM1 family [Piscirickettsia salmonis]	F	(gi:148827416) orfM (CGSHiGG_04080) - putative deoxyribonucleotide triphosphate pyrophosphatase [Haemophilus influenzae str. PittGG (nontypeable)]	Endotoxin
U4TKF1	K661_01502	Radical SAM superfamily protein	-5.29922	8.56352	5.16796	Piscirickettsia salmonis LF-89 = ATCC VR-1361.	Bacteria; Proteobacteria; Gammaproteobacteria; Thiotrichales;Piscirickettsiaceae; Piscirickettsia.	1227812	PSLF89_3322	chromosome	coproporphyrinogen III oxidase	hypothetical protein [Piscirickettsia salmonis]_x0001_gb|KGP96478.1| radical SAM superfamily protein [Piscirickettsia salmonis]	H	(gi:68249065) hemN (NTHI0594) - coproporphyrinogen III oxidase [Haemophilus influenzae str. 86-028NP (nontypeable)]	Metal uptake and heme acquisition
U4TD77	K661_01505	MMPL family protein	-4.0597	6.87602	2.45098	Piscirickettsia salmonis LF-89 = ATCC VR-1361.	Bacteria; Proteobacteria; Gammaproteobacteria; Thiotrichales;Piscirickettsiaceae; Piscirickettsia.	1227812	PSLF89_3326	chromosome	MMPL family protein	MMPL family protein [Piscirickettsia salmonis]_x0001_gb|KGP96481.1| MMPL family protein [Piscirickettsia salmonis]	V
U4TE97	K661_01159	Type II/IV secretion system family protein	-4.86954	6.5279	8.70787	Piscirickettsia salmonis LF-89 = ATCC VR-1361.	Bacteria; Proteobacteria; Gammaproteobacteria; Thiotrichales;Piscirickettsiaceae; Piscirickettsia.	1227812	PSLF89_335	chromosome	hypothetical protein	type II/IV secretion system family protein [Piscirickettsia salmonis]	NUW	(gi:54297434) pilB (lpp1479) - pilus assembly protein PilB [Legionella pneumophila str. Paris]	Adhesins, adherence and adhesion-related proteins
A0A0J1M576	AB894_01785	Cytochrome O ubiquinol oxidase	-4.15302	7.31494	5.59211	Piscirickettsia salmonis LF-89 = ATCC VR-1361.	Bacteria; Proteobacteria; Gammaproteobacteria; Thiotrichales;Piscirickettsiaceae; Piscirickettsia.	1227812	PSLF89_3355	chromosome	cytochrome ubiquinol oxidase subunit II	hypothetical protein [Piscirickettsia salmonis]_x0001_gb|KGP94610.1| ubiquinol oxidase, subunit II [Piscirickettsia salmonis]	C
U4TDQ9	K661_02132	Sugar (And other) transporter family protein	-4.87709	6.73529	3.16456	Piscirickettsia salmonis LF-89 = ATCC VR-1361.	Bacteria; Proteobacteria; Gammaproteobacteria; Thiotrichales;Piscirickettsiaceae; Piscirickettsia.	1227812	PSLF89_3356	chromosome	sugar (and other) transporter family protein	sugar (and other) transporter family protein [Piscirickettsia salmonis]	G
A0A0H4R324	glmS	Glutamine--fructose-6-phosphate aminotransferase [isomerizing]	-4.16115	6.0844	3.78913	Piscirickettsia salmonis LF-89 = ATCC VR-1361.	Bacteria; Proteobacteria; Gammaproteobacteria; Thiotrichales;Piscirickettsiaceae; Piscirickettsia.	1227812	PSLF89_3377	chromosome	glutamine--fructose-6-phosphate aminotransferase	glucosamine--fructose-6-phosphate aminotransferase [Piscirickettsia salmonis]_x0001_gb|AGG17600.1| glucosamine-fructose-6-phosphate transaminase [Piscirickettsia salmonis]_x0001_gb|KGP98217.1| glucosamine--fructose-6-phosphate aminotransferase [Piscirickettsia salmonis]	M
A0A0J1JB85	glmU	Bifunctional protein GlmU	-4.39094	6.28434	4.62555	Piscirickettsia salmonis LF-89 = ATCC VR-1361.	Bacteria; Proteobacteria; Gammaproteobacteria; Thiotrichales;Piscirickettsiaceae; Piscirickettsia.	1227812	PSLF89_3378	chromosome	bifunctional N-acetylglucosamine-1-phosphate uridyltransferase/glucosamine-1-phosphate acetyltransferase	bifunctional N-acetylglucosamine-1-phosphate uridyltransferase/glucosamine-1-phosphate acetyltransferase [Piscirickettsia salmonis]_x0001_gb|KGP98218.1| bifunctional N-acetylglucosamine-1-phosphate uridyltransferase/glucosamine-1-phosphate acetyltransferase [Piscirickettsia salmonis]	M
U4TPQ5	atpD	ATP synthase subunit beta	-4.06114	7.69345	4.53564	Piscirickettsia salmonis LF-89 = ATCC VR-1361.	Bacteria; Proteobacteria; Gammaproteobacteria; Thiotrichales;Piscirickettsiaceae; Piscirickettsia.	1227812	PSLF89_3380	chromosome	ATP synthase subunit beta	ATP synthase F1, beta subunit [Piscirickettsia salmonis]_x0001_gb|ERL63527.1| ATP synthase F1, beta subunit [Piscirickettsia salmonis LF-89= ATCC VR-1361]_x0001_gb|KGP98220.1| ATP synthase F1, beta subunit [Piscirickettsia salmonis]_x0001_gb|KGQ00303.1| ATP synthase F1, beta subunit [Piscirickettsia salmonis]	C	(gi:32266064) fliI (HH0565) - flagellum-specific ATP synthase [Helicobacter hepaticus str. ATCC 51449]	Motility and export apparatus
A0A0J1M1I7	atpA	ATP synthase subunit alpha	-7.69304	6.93016	4.2885	Piscirickettsia salmonis LF-89 = ATCC VR-1361.	Bacteria; Proteobacteria; Gammaproteobacteria; Thiotrichales;Piscirickettsiaceae; Piscirickettsia.	1227812	PSLF89_3382	chromosome	ATP synthase subunit alpha	F0F1 ATP synthase subunit alpha [Piscirickettsia salmonis]_x0001_gb|KGP98222.1| F0F1 ATP synthase subunit alpha [Piscirickettsia salmonis]	C	(gi:218892348) pscN (PLES_36301) - type III secretion system ATPase [Pseudomonas aeruginosa str. LESB58]	Secretion system
U4THA6	mnmG	tRNA uridine 5-carboxymethylaminomethyl modification enzyme MnmG	-4.59336	6.76327	5.39683	Piscirickettsia salmonis LF-89 = ATCC VR-1361.	Bacteria; Proteobacteria; Gammaproteobacteria; Thiotrichales;Piscirickettsiaceae; Piscirickettsia.	1227812	PSLF89_3390	chromosome	tRNA uridine 5-carboxymethylaminomethyl modification protein	tRNA uridine 5-carboxymethylaminomethyl modification enzyme GidA [Piscirickettsia salmonis]	J
A0A0J1JEL0	rplA	50S ribosomal protein L1	-8.58437	6.69399	13.3621	Piscirickettsia salmonis LF-89 = ATCC VR-1361.	Bacteria; Proteobacteria; Gammaproteobacteria; Thiotrichales;Piscirickettsiaceae; Piscirickettsia.	1227812	PSLF89_340	chromosome	50S ribosomal protein L1	50S ribosomal protein L1 [Piscirickettsia salmonis]_x0001_gb|KGP96685.1| 50S ribosomal protein L1 [Piscirickettsia salmonis]_x0001_gb|KGP99377.1| 50S ribosomal protein L1 [Piscirickettsia salmonis]	J
A0A0J1JEP2	fusA	Elongation factor G	-6.77776	8.82618	1.99147	Piscirickettsia salmonis LF-89 = ATCC VR-1361.	Bacteria; Proteobacteria; Gammaproteobacteria; Thiotrichales;Piscirickettsiaceae; Piscirickettsia.	1227812	PSLF89_347	chromosome	elongation factor G	elongation factor G [Piscirickettsia salmonis]_x0001_gb|KGP96678.1| elongation factor G [Piscirickettsia salmonis]	J	(gi:71894677) tuf (MS53_0667) - Elongation factor Tu [Mycoplasma synoviae str. 53]	Adhesins, adherence and adhesion-related proteins
U4TMI7	tuf	Elongation factor Tu	-4.18074	6.65556	10.101	Piscirickettsia salmonis LF-89 = ATCC VR-1361.	Bacteria; Proteobacteria; Gammaproteobacteria; Thiotrichales;Piscirickettsiaceae; Piscirickettsia.	1227812	PSLF89_348	chromosome	elongation factor Tu	translation elongation factor Tu [Piscirickettsia salmonis]_x0001_gb|ERL63123.1| translation elongation factor Tu [Piscirickettsia salmonis LF-89= ATCC VR-1361]_x0001_gb|KGP96677.1| translation elongation factor Tu [Piscirickettsia salmonis]_x0001_gb|KGP99369.1| translation elongation factor Tu [Piscirickettsia salmonis]	J	(gi:26553484) tuf (MYPE320) - elongation factor Tu [Mycoplasma penetrans str. HF-2]	Adhesins, adherence and adhesion-related proteins
A0A0J1JEQ2	rpsC	30S ribosomal protein S3	-5.70356	5.77415	3.68852	Piscirickettsia salmonis LF-89 = ATCC VR-1361.	Bacteria; Proteobacteria; Gammaproteobacteria; Thiotrichales;Piscirickettsiaceae; Piscirickettsia.	1227812	PSLF89_355	chromosome	30S ribosomal protein S3	30S ribosomal protein S3 [Piscirickettsia salmonis]_x0001_gb|KGP96669.1| 30S ribosomal protein S3 [Piscirickettsia salmonis]	J
U4TG03	rpsK	30S ribosomal protein S11	-4.35313	6.25764	13.9535	Piscirickettsia salmonis LF-89 = ATCC VR-1361.	Bacteria; Proteobacteria; Gammaproteobacteria; Thiotrichales;Piscirickettsiaceae; Piscirickettsia.	1227812	PSLF89_369	chromosome	30S ribosomal protein S11	30S ribosomal protein S11 [Piscirickettsia salmonis]_x0001_gb|ERL63094.1| 30S ribosomal protein S11 [Piscirickettsia salmonis LF-89 = ATCC VR-1361]_x0001_gb|KGP96653.1| 30S ribosomal protein S11 [Piscirickettsia salmonis]_x0001_gb|KGP99345.1| 30S ribosomal protein S11 [Piscirickettsia salmonis]	J
A0A0J1JEV8	AB894_01970	ATP-dependent protease subunit HslV	-5.72977	7.04247	15.9509	Piscirickettsia salmonis LF-89 = ATCC VR-1361.	Bacteria; Proteobacteria; Gammaproteobacteria; Thiotrichales;Piscirickettsiaceae; Piscirickettsia.	1227812	PSLF89_395	chromosome	ATP-dependent protease subunit HslV	hypothetical protein [Piscirickettsia salmonis]_x0001_gb|KGP96265.1| ATP-dependent protease HslVU, peptidase subunit [Piscirickettsia salmonis]	O
U4TE86	K661_01960	Uncharacterized protein	-4.74528	9.08298	20.5607	Piscirickettsia salmonis LF-89 = ATCC VR-1361.	Bacteria; Proteobacteria; Gammaproteobacteria; Thiotrichales;Piscirickettsiaceae; Piscirickettsia.	1227812	PSLF89_3p11	pPSLF89-3	hypothetical protein	hypothetical protein [Piscirickettsia salmonis]_x0001_gb|KGP97626.1| hypothetical protein KU39_00828 [Piscirickettsia salmonis]	No orthologs found
A0A0J1JCK5	ORFNames=AB894_06705, PSLF89_3p13	Uncharacterized protein	-10.7862	6.68637	9.10405	Piscirickettsia salmonis LF-89 = ATCC VR-1361.	Bacteria; Proteobacteria; Gammaproteobacteria; Thiotrichales;Piscirickettsiaceae; Piscirickettsia.	1227812	PSLF89_3p13	pPSLF89-3	hypothetical protein	hypothetical protein [Piscirickettsia salmonis]_x0001_gb|KGP97624.1| minor tail protein [Piscirickettsia salmonis]	X
U4T7B2	K661_03113	CobQ/CobB/MinD/ParA nucleotide binding domain protein	-4.25874	7.97122	11.7647	Piscirickettsia salmonis LF-89 = ATCC VR-1361.	Bacteria; Proteobacteria; Gammaproteobacteria; Thiotrichales;Piscirickettsiaceae; Piscirickettsia.	1227812	PSLF89_3p23	pPSLF89-3	hypothetical protein	hypothetical protein [Piscirickettsia salmonis]	N
U4THJ9	K661_02217	Uncharacterized protein	-4.23669	6.00022	7.26644	Piscirickettsia salmonis LF-89 = ATCC VR-1361.	Bacteria; Proteobacteria; Gammaproteobacteria; Thiotrichales;Piscirickettsiaceae; Piscirickettsia.	1227812	PSLF89_3p26	pPSLF89-3	hypothetical protein	hypothetical protein [Piscirickettsia salmonis]	No orthologs found
U4TJ48	K661_01952	Phage major capsid protein, HK97 family	-4.35241	6.06606	5.79345	Piscirickettsia salmonis LF-89 = ATCC VR-1361.	Bacteria; Proteobacteria; Gammaproteobacteria; Thiotrichales;Piscirickettsiaceae; Piscirickettsia.	1227812	PSLF89_3p3	pPSLF89-3	phage capsid protein	phage major capsid protein, HK97 family [Piscirickettsia salmonis]_x0001_gb|KGP97634.1| phage major capsid protein, HK97 family [Piscirickettsia salmonis]	X
A0A0H4R4M6	PSLF89_3p39	Uncharacterized protein	-6.2633	5.93401	5.81717	Piscirickettsia salmonis LF-89 = ATCC VR-1361.	Bacteria; Proteobacteria; Gammaproteobacteria; Thiotrichales;Piscirickettsiaceae; Piscirickettsia.	1227812	PSLF89_3p39	pPSLF89-3	hypothetical protein	hypothetical protein [Piscirickettsia salmonis]	No orthologs found
U4T7Y0	K661_02878	Uncharacterized protein	-4.426	5.87878	4.35967	Piscirickettsia salmonis LF-89 = ATCC VR-1361.	Bacteria; Proteobacteria; Gammaproteobacteria; Thiotrichales;Piscirickettsiaceae; Piscirickettsia.	1227812	PSLF89_3p54	pPSLF89-3	hypothetical protein	hypothetical protein [Piscirickettsia salmonis]_x0001_gb|KGP95814.1| molybdopterin biosynthesis protein MoeB [Piscirickettsia salmonis]_x0001_gb|KGP98680.1| molybdopterin biosynthesis protein MoeB [Piscirickettsia salmonis]	No orthologs found
A0A0H4R3S2	PSLF89_3p7	Phage head-tail adaptor	-4.59024	6.48821	26.5152	Piscirickettsia salmonis LF-89 = ATCC VR-1361.	Bacteria; Proteobacteria; Gammaproteobacteria; Thiotrichales;Piscirickettsiaceae; Piscirickettsia.	1227812	PSLF89_3p7	pPSLF89-3	phage tail protein	phage head-tail joining family protein, partial [Piscirickettsia salmonis]	X
U4TLI1	leuS	Leucine--tRNA ligase	-4.549	8.01299	2.42131	Piscirickettsia salmonis LF-89 = ATCC VR-1361.	Bacteria; Proteobacteria; Gammaproteobacteria; Thiotrichales;Piscirickettsiaceae; Piscirickettsia.	1227812	PSLF89_405	chromosome	leucine--tRNA ligase	leucyl-tRNA synthetase [Piscirickettsia salmonis]_x0001_gb|KGP96275.1| leucine--tRNA ligase [Piscirickettsia salmonis]	J
U4TKK5	holA	DNA polymerase III, delta subunit	-6.19416	7.2056	10.6936	Piscirickettsia salmonis LF-89 = ATCC VR-1361.	Bacteria; Proteobacteria; Gammaproteobacteria; Thiotrichales;Piscirickettsiaceae; Piscirickettsia.	1227812	PSLF89_407	chromosome	DNA polymerase III subunit delta	DNA polymerase III subunit delta [Piscirickettsia salmonis]	L
U4TGF2	rsfS	Ribosomal silencing factor RsfS	-5.82213	6.50847	31.5315	Piscirickettsia salmonis LF-89 = ATCC VR-1361.	Bacteria; Proteobacteria; Gammaproteobacteria; Thiotrichales;Piscirickettsiaceae; Piscirickettsia.	1227812	PSLF89_409	chromosome	ribosome silencing factor	oligomerisation domain protein [Piscirickettsia salmonis]_x0001_gb|ERL62470.1| oligomerisation domain protein [Piscirickettsia salmonis LF-89= ATCC VR-1361]_x0001_gb|KGP96279.1| oligomerization domain protein [Piscirickettsia salmonis]_x0001_gb|KGP99087.1| oligomerization domain protein [Piscirickettsia salmonis]	J
A0A0J1M3Y8	ORFNames=AB894_04120, PSLF89_425	Uncharacterized protein	-6.60648	6.1068	6.75	Piscirickettsia salmonis LF-89 = ATCC VR-1361.	Bacteria; Proteobacteria; Gammaproteobacteria; Thiotrichales;Piscirickettsiaceae; Piscirickettsia.	1227812	PSLF89_425	chromosome	hypothetical protein	hypothetical protein [Piscirickettsia salmonis]_x0001_gb|KGP93822.1| hypothetical protein KU39_03655 [Piscirickettsia salmonis]	No orthologs found
A0A0J1JBR0	AB894_07815	EVE domain-containing protein	-4.47115	6.78073	16.3399	Piscirickettsia salmonis LF-89 = ATCC VR-1361.	Bacteria; Proteobacteria; Gammaproteobacteria; Thiotrichales;Piscirickettsiaceae; Piscirickettsia.	1227812	PSLF89_435	chromosome	EVE domain-containing protein	hypothetical protein [Piscirickettsia salmonis]_x0001_gb|KGP96056.1| EVE domain protein [Piscirickettsia salmonis]	R
U4TFE3	K661_00766	Ubiquinone biosynthesis hydroxylase, UbiH/UbiF/VisC/COQ6 family protein	-6.33877	6.07836	6.75991	Piscirickettsia salmonis LF-89 = ATCC VR-1361.	Bacteria; Proteobacteria; Gammaproteobacteria; Thiotrichales;Piscirickettsiaceae; Piscirickettsia.	1227812	PSLF89_440	chromosome	ubiquinone biosynthesis protein	hypothetical protein [Piscirickettsia salmonis]_x0001_gb|KGP96061.1| ubiquinone biosynthesis hydroxylase, UbiH/UbiF/VisC/COQ6 family protein [Piscirickettsia salmonis]	HC
U4TMT0	K661_00767	Ubiquinone biosynthesis hydroxylase, UbiH/UbiF/VisC/COQ6 family protein	-4.61237	5.95741	3.35731	Piscirickettsia salmonis LF-89 = ATCC VR-1361.	Bacteria; Proteobacteria; Gammaproteobacteria; Thiotrichales;Piscirickettsiaceae; Piscirickettsia.	1227812	PSLF89_441	chromosome	ubiquinone biosynthesis protein	ubiquinone biosynthesis protein [Piscirickettsia salmonis]_x0001_gb|KGP96062.1| ubiquinone biosynthesis protein [Piscirickettsia salmonis]	HC
A0A0J1J8Q5	gpmI	2,3-bisphosphoglycerate-independent phosphoglycerate mutase	-4.29727	6.57741	5.90551	Piscirickettsia salmonis LF-89 = ATCC VR-1361.	Bacteria; Proteobacteria; Gammaproteobacteria; Thiotrichales;Piscirickettsiaceae; Piscirickettsia.	1227812	PSLF89_45	chromosome	2,3-bisphosphoglycerate-independent phosphoglycerate mutase		G
A0A0J1JBT9	nrdA	Ribonucleoside-diphosphate reductase	-6.32028	6.16275	2.7897	Piscirickettsia salmonis LF-89 = ATCC VR-1361.	Bacteria; Proteobacteria; Gammaproteobacteria; Thiotrichales;Piscirickettsiaceae; Piscirickettsia.	1227812	PSLF89_451	chromosome	ribonucleotide-diphosphate reductase subunit alpha	hypothetical protein [Piscirickettsia salmonis]_x0001_gb|KGP96071.1| ribonucleoside-diphosphate reductase, alpha subunit [Piscirickettsia salmonis]	F	**
A0A0H4QYA8	rfaE	Bifunctional protein HldE	-10.1388	7.12117	8.01688	Piscirickettsia salmonis LF-89 = ATCC VR-1361.	Bacteria; Proteobacteria; Gammaproteobacteria; Thiotrichales;Piscirickettsiaceae; Piscirickettsia.	1227812	PSLF89_470	chromosome	bifunctional heptose 7-phosphate kinase/heptose 1-phosphate adenyltransferase	nucleotidyltransferase [Piscirickettsia salmonis]_x0001_gb|KGP95941.1| nucleotidyltransferase [Piscirickettsia salmonis]	M	(gi:113460721) rfaE (HS_0576) - ADP-heptose synthase [Haemophilus somnus str. 129PT]	Endotoxin
U4T884	K661_02758	Uncharacterized protein	-5.06966	6.48161	12.9944	Piscirickettsia salmonis LF-89 = ATCC VR-1361.	Bacteria; Proteobacteria; Gammaproteobacteria; Thiotrichales;Piscirickettsiaceae; Piscirickettsia.	1227812	PSLF89_486	chromosome	hypothetical protein	hypothetical protein [Piscirickettsia salmonis]_x0001_gb|KGP95923.1| hypothetical protein KU39_02073 [Piscirickettsia salmonis]	No orthologs found
A0A0H4QZ99	PSLF89_50	Uncharacterized protein	-4.82491	7.52635	3.77644	Piscirickettsia salmonis LF-89 = ATCC VR-1361.	Bacteria; Proteobacteria; Gammaproteobacteria; Thiotrichales;Piscirickettsiaceae; Piscirickettsia.	1227812	PSLF89_50	chromosome	hypothetical protein	0	No orthologs found
A0A0J1JFA8	icmE	Conjugal transfer protein TrbI	-4.28133	6.25057	3.9312	Piscirickettsia salmonis LF-89 = ATCC VR-1361.	Bacteria; Proteobacteria; Gammaproteobacteria; Thiotrichales;Piscirickettsiaceae; Piscirickettsia.	1227812	PSLF89_504	chromosome	conjugal transfer protein TrbI	conjugal transfer protein TrbI [Piscirickettsia salmonis]_x0001_gb|KGP96900.1| type IV secretion system protein IcmE [Piscirickettsia salmonis]	U	(gi:52840696) icmE/dotG (lpg0451) - IcmE (DotG) [Legionella pneumophila str. Philadelphia 1]	Secretion system
A0A0J1M5J9	AB894_00965	Uncharacterized protein	-4.19275	6.45596	1.30378	Piscirickettsia salmonis LF-89 = ATCC VR-1361.	Bacteria; Proteobacteria; Gammaproteobacteria; Thiotrichales;Piscirickettsiaceae; Piscirickettsia.	1227812	PSLF89_521	chromosome	hypothetical protein	hypothetical protein [Piscirickettsia salmonis]_x0001_gb|KGP96883.1| hypothetical protein KU39_01373 [Piscirickettsia salmonis]	No orthologs found
A0A0J1JFG2	AB894_00955	Uncharacterized protein	-5.25877	7.92901	3.35917	Piscirickettsia salmonis LF-89 = ATCC VR-1361.	Bacteria; Proteobacteria; Gammaproteobacteria; Thiotrichales;Piscirickettsiaceae; Piscirickettsia.	1227812	PSLF89_523	chromosome	hypothetical protein	hypothetical protein [Piscirickettsia salmonis]_x0001_gb|KGP96881.1| type IV secretion system protein DotA [Piscirickettsia salmonis]	U	(gi:54295526) dotA (lpl2613) - defect in organelle trafficking protein DotA [Legionella pneumophila str. Lens]	Secretion system
U4TKF6	K661_01508	Kinase domain protein	-4.60974	6.21862	5.09259	Piscirickettsia salmonis LF-89 = ATCC VR-1361.	Bacteria; Proteobacteria; Gammaproteobacteria; Thiotrichales;Piscirickettsiaceae; Piscirickettsia.	1227812	PSLF89_53	chromosome	hypothetical protein	hypothetical protein [Piscirickettsia salmonis]_x0001_gb|KGP95103.1| kinase domain protein [Piscirickettsia salmonis]	No orthologs found
U4TIT4	K661_02064	Uncharacterized protein	-4.70238	5.7904	13.1034	Piscirickettsia salmonis LF-89 = ATCC VR-1361.	Bacteria; Proteobacteria; Gammaproteobacteria; Thiotrichales;Piscirickettsiaceae; Piscirickettsia.	1227812	PSLF89_539	chromosome	hypothetical protein	hypothetical protein [Piscirickettsia salmonis]_x0001_gb|KGP94734.1| putative Co/Zn/Cd efflux system membrane fusion protein [Piscirickettsia salmonis]	No orthologs found
A0A0J1JEZ9	ORFNames=AB894_01750, AB894_15540	MarR family protein	-4.59248	6.54003	8.60927	Piscirickettsia salmonis LF-89 = ATCC VR-1361.	Bacteria; Proteobacteria; Gammaproteobacteria; Thiotrichales;Piscirickettsiaceae; Piscirickettsia.	1227812	PSLF89_549	chromosome	MarR family transcriptional regulator	marR family protein [Piscirickettsia salmonis]	K
U4TCK8	K661_01748	Uncharacterized protein	-4.28596	8.21086	7.37327	Piscirickettsia salmonis LF-89 = ATCC VR-1361.	Bacteria; Proteobacteria; Gammaproteobacteria; Thiotrichales;Piscirickettsiaceae; Piscirickettsia.	1227812	PSLF89_556	chromosome	hypothetical protein	hypothetical protein [Piscirickettsia salmonis]_x0001_gb|KGP95479.1| phosphate transport regulator [Piscirickettsia salmonis]	S
A0A0J1J895	ORFNames=AB894_01715, AB894_14290	Pyridine nucleotide-disulfide oxidoreductase	-4.22644	6.62808	8.59599	Piscirickettsia salmonis LF-89 = ATCC VR-1361.	Bacteria; Proteobacteria; Gammaproteobacteria; Thiotrichales;Piscirickettsiaceae; Piscirickettsia.	1227812	PSLF89_558	chromosome	pyridine nucleotide-disulfide oxidoreductase	hypothetical protein [Piscirickettsia salmonis]_x0001_gb|KGP95477.1| pyridine nucleotide-disulfide oxidoreductase family protein [Piscirickettsia salmonis]	P
A0A0H4QYJ1	mtnC	Enolase-phosphatase E1	-4.35668	6.11343	9.64912	Piscirickettsia salmonis LF-89 = ATCC VR-1361.	Bacteria; Proteobacteria; Gammaproteobacteria; Thiotrichales;Piscirickettsiaceae; Piscirickettsia.	1227812	PSLF89_563	chromosome	haloacid dehalogenase	hypothetical protein [Piscirickettsia salmonis]_x0001_gb|KGP95472.1| 2,3-diketo-5-methylthio-1-phosphopentane phosphatase [Piscirickettsia salmonis]	E
A0A0J1JF85	ychJ	Nucleic acid-binding domain protein	-6.18106	5.83452	19.084	Piscirickettsia salmonis LF-89 = ATCC VR-1361.	Bacteria; Proteobacteria; Gammaproteobacteria; Thiotrichales;Piscirickettsiaceae; Piscirickettsia.	1227812	PSLF89_568	chromosome	nucleic acid-binding protein	SEC-C motif domain protein [Piscirickettsia salmonis]	S
U4T9N9	K661_02796	Kinase domain protein	-4.8723	5.86108	5.85106	Piscirickettsia salmonis LF-89 = ATCC VR-1361.	Bacteria; Proteobacteria; Gammaproteobacteria; Thiotrichales;Piscirickettsiaceae; Piscirickettsia.	1227812	PSLF89_569	chromosome	kinase	hypothetical protein [Piscirickettsia salmonis]_x0001_gb|KGP95466.1| kinase domain protein [Piscirickettsia salmonis]	No orthologs found
A0A0H4QYK7	ORFNames=AB894_08725, PSLF89_582	Amidohydrolase	-5.64201	6.5139	9.64286	Piscirickettsia salmonis LF-89 = ATCC VR-1361.	Bacteria; Proteobacteria; Gammaproteobacteria; Thiotrichales;Piscirickettsiaceae; Piscirickettsia.	1227812	PSLF89_582	chromosome	hypothetical protein	hypothetical protein [Piscirickettsia salmonis]_x0001_gb|KGP94676.1| amidohydrolase [Piscirickettsia salmonis]	R
A0A075FFN9	hemeR	TonB-dependent heme/siderophore receptor	-4.72864	6.40896	3.65297	Piscirickettsia salmonis LF-89 = ATCC VR-1361.	Bacteria; Proteobacteria; Gammaproteobacteria; Thiotrichales;Piscirickettsiaceae; Piscirickettsia.	1227812	PSLF89_585	chromosome	TonB-dependent receptor	TonB-dependent heme/siderophore receptor [Piscirickettsia salmonis]	H		Metal uptake and heme acquisition
U4TA46	K661_02615	ABC transporter family protein	-5.7519	6.27002	8.23529	Piscirickettsia salmonis LF-89 = ATCC VR-1361.	Bacteria; Proteobacteria; Gammaproteobacteria; Thiotrichales;Piscirickettsiaceae; Piscirickettsia.	1227812	PSLF89_587	chromosome	ABC transporter family protein	ABC transporter family protein [Piscirickettsia salmonis]	V	(gi:118466584) ddrA (MAV_3250) - daunorubicin resistance ATP-binding protein DrrA [Mycobacterium avium str. 104]	Cell surface components
A0A0J1LYD9	purB	Adenylosuccinate lyase	-10.158	6.78766	12.9386	Piscirickettsia salmonis LF-89 = ATCC VR-1361.	Bacteria; Proteobacteria; Gammaproteobacteria; Thiotrichales;Piscirickettsiaceae; Piscirickettsia.	1227812	PSLF89_593	chromosome	adenylosuccinate lyase	hypothetical protein [Piscirickettsia salmonis]_x0001_gb|KGP93810.1| adenylosuccinate lyase [Piscirickettsia salmonis]	F	**
A0A0H4QWG7	PSLF89_598	Uncharacterized protein	-4.71444	6.10056	12.9151	Piscirickettsia salmonis LF-89 = ATCC VR-1361.	Bacteria; Proteobacteria; Gammaproteobacteria; Thiotrichales;Piscirickettsiaceae; Piscirickettsia.	1227812	PSLF89_598	chromosome	hypothetical protein	DEAD/DEAH box helicase [Piscirickettsia salmonis]	No orthologs found
A0A0J1JC56	acnA	Aconitate hydratase	-4.16238	6.98792	2.12054	Piscirickettsia salmonis LF-89 = ATCC VR-1361.	Bacteria; Proteobacteria; Gammaproteobacteria; Thiotrichales;Piscirickettsiaceae; Piscirickettsia.	1227812	PSLF89_601	chromosome	aconitate hydratase	hypothetical protein [Piscirickettsia salmonis]_x0001_gb|KGP96988.1| aconitate hydratase 1 [Piscirickettsia salmonis]	C
A0A0J1M2G8	icmE	Conjugal transfer protein TrbI	-4.52153	6.36851	7.30479	Piscirickettsia salmonis LF-89 = ATCC VR-1361.	Bacteria; Proteobacteria; Gammaproteobacteria; Thiotrichales;Piscirickettsiaceae; Piscirickettsia.	1227812	PSLF89_604	chromosome	conjugal transfer protein TrbI	conjugal transfer protein TrbI [Piscirickettsia salmonis]_x0001_gb|KGP96991.1| type IV secretion system protein IcmE [Piscirickettsia salmonis]	U	(gi:52840696) icmE/dotG (lpg0451) - IcmE (DotG) [Legionella pneumophila str. Philadelphia 1]	Secretion system
U4TMN8	K661_00443	Uncharacterized protein	-4.27934	5.67766	3.98773	Piscirickettsia salmonis LF-89 = ATCC VR-1361.	Bacteria; Proteobacteria; Gammaproteobacteria; Thiotrichales;Piscirickettsiaceae; Piscirickettsia.	1227812	PSLF89_605	chromosome	hypothetical protein	hypothetical protein [Piscirickettsia salmonis]_x0001_gb|KGP96992.1| type IV secretion system protein IcmG [Piscirickettsia salmonis]	U	(gi:54293445) icmG/dotF (lpl0494) - hypothetical protein [Legionella pneumophila str. Lens]	Secretion system
U4TNL5	K661_00455	AAA-like domain protein	-4.4673	6.68705	3.19361	Piscirickettsia salmonis LF-89 = ATCC VR-1361.	Bacteria; Proteobacteria; Gammaproteobacteria; Thiotrichales;Piscirickettsiaceae; Piscirickettsia.	1227812	PSLF89_617	chromosome	AAA family ATPase	ATPase AAA [Piscirickettsia salmonis]_x0001_gb|KGP97004.1| type IV secretion system protein IcmB [Piscirickettsia salmonis]	U	(gi:148360927) icmB/dotO (LPC_2887) - IcmB (DotO) [Legionella pneumophila str. Corby]	Secretion system
U4TIG2	K661_00457	Conjugal transfer/type IV secretion DotA/TraY family protein	-4.49958	8.07843	2.51866	Piscirickettsia salmonis LF-89 = ATCC VR-1361.	Bacteria; Proteobacteria; Gammaproteobacteria; Thiotrichales;Piscirickettsiaceae; Piscirickettsia.	1227812	PSLF89_619	chromosome	type IV secretion protein DotA	conjugal transfer/type IV secretion DotA/TraY family protein [Piscirickettsia salmonis]_x0001_gb|ERL63175.1| conjugal transfer/type IV secretion DotA/TraY family protein[Piscirickettsia salmonis LF-89 = ATCC VR-1361]	GEU	(gi:54298676) dotA (lpp2740) - defect in organelle trafficking protein DotA [Legionella pneumophila str. Paris]	Secretion system
U4TEK4	K661_00467	Uncharacterized protein	-4.9815	6.25092	5.05415	Piscirickettsia salmonis LF-89 = ATCC VR-1361.	Bacteria; Proteobacteria; Gammaproteobacteria; Thiotrichales;Piscirickettsiaceae; Piscirickettsia.	1227812	PSLF89_630	chromosome	hypothetical protein	hypothetical protein [Piscirickettsia salmonis]_x0001_gb|KGP97019.1| hypothetical protein KU39_01311 [Piscirickettsia salmonis]	No orthologs found
U4TA31	K661_02633	Uncharacterized protein	-4.05425	6.20917	3.61991	Piscirickettsia salmonis LF-89 = ATCC VR-1361.	Bacteria; Proteobacteria; Gammaproteobacteria; Thiotrichales;Piscirickettsiaceae; Piscirickettsia.	1227812	PSLF89_631	chromosome	hypothetical protein	hypothetical protein [Piscirickettsia salmonis]_x0001_gb|KGP97020.1| alpha-L-Rha alpha-1,3-L-rhamnosyltransferase [Piscirickettsia salmonis]	No orthologs found
A0A0J1LZ10	ORFNames=AB894_13510, PSLF89_637	Uncharacterized protein	-5.27316	6.10861	3.46535	Piscirickettsia salmonis LF-89 = ATCC VR-1361.	Bacteria; Proteobacteria; Gammaproteobacteria; Thiotrichales;Piscirickettsiaceae; Piscirickettsia.	1227812	PSLF89_637	chromosome	hypothetical protein	hypothetical protein [Piscirickettsia salmonis]_x0001_gb|KGP95962.1| hypothetical protein KU39_02037 [Piscirickettsia salmonis]	No orthologs found
A0A0H4QYC3	def	Peptide deformylase	-7.33452	7.50585	25.4438	Piscirickettsia salmonis LF-89 = ATCC VR-1361.	Bacteria; Proteobacteria; Gammaproteobacteria; Thiotrichales;Piscirickettsiaceae; Piscirickettsia.	1227812	PSLF89_650	chromosome	peptide deformylase	peptide deformylase [Piscirickettsia salmonis]_x0001_gb|KGP95974.1| peptide deformylase [Piscirickettsia salmonis]	J
U4TN13	K661_00312	Uncharacterized protein	-7.61441	6.19444	1.37457	Piscirickettsia salmonis LF-89 = ATCC VR-1361.	Bacteria; Proteobacteria; Gammaproteobacteria; Thiotrichales;Piscirickettsiaceae; Piscirickettsia.	1227812	PSLF89_682	chromosome	hypothetical protein	hypothetical protein [Piscirickettsia salmonis]_x0001_gb|KGP97261.1| cobyric acid synthase [Piscirickettsia salmonis]	No orthologs found
U4TGK7	rsmI	Ribosomal RNA small subunit methyltransferase I	-4.41153	6.74872	7.52688	Piscirickettsia salmonis LF-89 = ATCC VR-1361.	Bacteria; Proteobacteria; Gammaproteobacteria; Thiotrichales;Piscirickettsiaceae; Piscirickettsia.	1227812	PSLF89_683	chromosome	tetrapyrrole methylase	hypothetical protein [Piscirickettsia salmonis]_x0001_gb|AGG17602.1| Uroporphyrin-III C/tetrapyrrole methyltransferase [Piscirickettsia salmonis]_x0001_gb|KGP97260.1| tetrapyrrole (Corrin/Porphyrin) Methylases family protein [Piscirickettsia salmonis]	J
A0A0J1JC73	ORFNames=AB894_07435, PSLF89_696	Uncharacterized protein	-5.34289	6.32261	12.9213	Piscirickettsia salmonis LF-89 = ATCC VR-1361.	Bacteria; Proteobacteria; Gammaproteobacteria; Thiotrichales;Piscirickettsiaceae; Piscirickettsia.	1227812	PSLF89_696	chromosome	hypothetical protein	hypothetical protein [Piscirickettsia salmonis]_x0001_gb|KGP97266.1| phenylalanine--tRNA ligase beta subunit [Piscirickettsia salmonis]	No orthologs found
U4TEX8	K661_00324	Response regulator	-5.22204	6.61227	8.77743	Piscirickettsia salmonis LF-89 = ATCC VR-1361.	Bacteria; Proteobacteria; Gammaproteobacteria; Thiotrichales;Piscirickettsiaceae; Piscirickettsia.	1227812	PSLF89_703	chromosome	response regulator	response regulator [Piscirickettsia salmonis]_x0001_gb|KGP97280.1| response regulator [Piscirickettsia salmonis]	T
A0A0H4R0Q8	ORFNames=AB894_07485, PSLF89_705	tRNA guanosine-2'-O-methyltransferase	-4.33191	7.59504	12.0536	Piscirickettsia salmonis LF-89 = ATCC VR-1361.	Bacteria; Proteobacteria; Gammaproteobacteria; Thiotrichales;Piscirickettsiaceae; Piscirickettsia.	1227812	PSLF89_705	chromosome	tRNA guanosine-2'-O-methyltransferase	tRNA guanosine-2'-O-methyltransferase [Piscirickettsia salmonis]	J
A0A0J1JC65	AB894_07500	Pyridoxal phosphate-dependent aminotransferase	-4.21574	6.96064	7.03125	Piscirickettsia salmonis LF-89 = ATCC VR-1361.	Bacteria; Proteobacteria; Gammaproteobacteria; Thiotrichales;Piscirickettsiaceae; Piscirickettsia.	1227812	PSLF89_708	chromosome	UDP-4-amino-4, 6-dideoxy-N-acetyl-beta-L-altrosamine transaminase	pyridoxal phosphate-dependent aminotransferase [Piscirickettsia salmonis]_x0001_gb|KGP98091.1| pyridoxal phosphate-dependent aminotransferase [Piscirickettsia salmonis]	M	(gi:33599142) bplF (BB0150) - lipopolysaccharide biosynthesis protein [Bordetella bronchiseptica str. RB50]	Endotoxin
U4TGK2	lysA	Diaminopimelate decarboxylase	-9.48275	7.56508	5.38642	Piscirickettsia salmonis LF-89 = ATCC VR-1361.	Bacteria; Proteobacteria; Gammaproteobacteria; Thiotrichales;Piscirickettsiaceae; Piscirickettsia.	1227812	PSLF89_713	chromosome	hypothetical protein	hypothetical protein [Piscirickettsia salmonis]_x0001_gb|KGP97290.1| diaminopimelate decarboxylase [Piscirickettsia salmonis]	E	(gi:120405303) lysA (Mvan_4349) - diaminopimelate decarboxylase [Mycobacterium vanbaalenii str. PYR-1]	Amino acid and purine metabolism
U4TN47	K661_00335	Aspartokinase	-4.72547	6.60986	5.31178	Piscirickettsia salmonis LF-89 = ATCC VR-1361.	Bacteria; Proteobacteria; Gammaproteobacteria; Thiotrichales;Piscirickettsiaceae; Piscirickettsia.	1227812	PSLF89_714	chromosome	aspartate kinase	aspartate kinase [Piscirickettsia salmonis]_x0001_gb|KGP97291.1| aspartate kinase [Piscirickettsia salmonis]	E
A0A0J1JC61	oppF	OppF	-5.6132	7.10811	4.92308	Piscirickettsia salmonis LF-89 = ATCC VR-1361.	Bacteria; Proteobacteria; Gammaproteobacteria; Thiotrichales;Piscirickettsiaceae; Piscirickettsia.	1227812	PSLF89_719	chromosome	peptide ABC transporter ATP-binding protein	hypothetical protein [Piscirickettsia salmonis]_x0001_gb|KGP97296.1| oligopeptide/dipeptide ABC transporter, ATP-binding , C-terminal domain protein [Piscirickettsia salmonis]	E	(gi:42561491) oppF (MSC_0975) - oligopeptide ABC transporter, permease component [Mycoplasma mycoides str. PG1]	Antiphagocytosis, capsule
U4TGL9	K661_02541	Helix-turn-helix family protein	-4.22837	6.23791	14.8148	Piscirickettsia salmonis LF-89 = ATCC VR-1361.	Bacteria; Proteobacteria; Gammaproteobacteria; Thiotrichales;Piscirickettsiaceae; Piscirickettsia.	1227812	PSLF89_723	chromosome	hypothetical protein	hypothetical protein [Piscirickettsia salmonis]_x0001_gb|KGP97299.1| cro/C1-type HTH DNA-binding domain protein [Piscirickettsia salmonis]	No orthologs found
A0A0H4R0T1	birA	Bifunctional ligase/repressor BirA	-4.33939	6.413	7.95107	Piscirickettsia salmonis LF-89 = ATCC VR-1361.	Bacteria; Proteobacteria; Gammaproteobacteria; Thiotrichales;Piscirickettsiaceae; Piscirickettsia.	1227812	PSLF89_726	chromosome	biotin--acetyl-CoA-carboxylase ligase	hypothetical protein [Piscirickettsia salmonis]_x0001_gb|KGP95868.1| biotin--[acetyl-CoA-carboxylase] ligase [Piscirickettsia salmonis]	K
A0A0J1J9W1	ORFNames=AB894_11455, PSLF89_740	Uncharacterized protein	-4.16107	6.7462	10.6383	Piscirickettsia salmonis LF-89 = ATCC VR-1361.	Bacteria; Proteobacteria; Gammaproteobacteria; Thiotrichales;Piscirickettsiaceae; Piscirickettsia.	1227812	PSLF89_740	chromosome	hypothetical protein	hypothetical protein [Piscirickettsia salmonis]_x0001_gb|KGP93688.1| RNA pseudouridine synthase [Piscirickettsia salmonis]	No orthologs found
U4TED9	K661_01889	UbiE/COQ5 methyltransferase family protein	-5.21354	6.72646	5.6391	Piscirickettsia salmonis LF-89 = ATCC VR-1361.	Bacteria; Proteobacteria; Gammaproteobacteria; Thiotrichales;Piscirickettsiaceae; Piscirickettsia.	1227812	PSLF89_749	chromosome	hypothetical protein	hypothetical protein [Piscirickettsia salmonis]	No orthologs found
A0A0H4RFL8	ORFNames=AB894_03755, PSLF89_751	Putative N-acetylglucosamine-6-phosphate deacetylase	-4.69465	6.30001	8.89488	Piscirickettsia salmonis LF-89 = ATCC VR-1361.	Bacteria; Proteobacteria; Gammaproteobacteria; Thiotrichales;Piscirickettsiaceae; Piscirickettsia.	1227812	PSLF89_751	chromosome	hypothetical protein	hypothetical protein [Piscirickettsia salmonis]	No orthologs found
A0A0J1JE04	ORFNames=AB894_03770, PSLF89_754	DNA-binding protein	-10.026	6.03041	6.97674	Piscirickettsia salmonis LF-89 = ATCC VR-1361.	Bacteria; Proteobacteria; Gammaproteobacteria; Thiotrichales;Piscirickettsiaceae; Piscirickettsia.	1227812	PSLF89_754	chromosome	DNA-binding protein	hypothetical protein [Piscirickettsia salmonis]_x0001_gb|KGP94522.1| helix-turn-helix family protein [Piscirickettsia salmonis]	G
A0A0H4QWV8	PSLF89_768	Uncharacterized protein	-4.06787	6.23174	2.81195	Piscirickettsia salmonis LF-89 = ATCC VR-1361.	Bacteria; Proteobacteria; Gammaproteobacteria; Thiotrichales;Piscirickettsiaceae; Piscirickettsia.	1227812	PSLF89_768	chromosome	hypothetical protein	hypothetical protein [Piscirickettsia salmonis]_x0001_gb|KGP94909.1| pentapeptide repeats family protein [Piscirickettsia salmonis]	S	(gi:207858048) pipB2 (SEN2624) - exported protein [Salmonella enterica str. P125109 (serovar Enteritidis)]	Toxin, efector protein
U4TJF9	K661_01847	Kinase domain protein	-4.15908	6.27123	4.209	Piscirickettsia salmonis LF-89 = ATCC VR-1361.	Bacteria; Proteobacteria; Gammaproteobacteria; Thiotrichales;Piscirickettsiaceae; Piscirickettsia.	1227812	PSLF89_777	chromosome	hypothetical protein	kinase domain protein [Piscirickettsia salmonis]	T	(gi:15836235) pkn5 (CPj0703) - S/T protein kinase [Chlamydia pneumoniae str. J138]	Toxin, efector protein
A0A0H4QX10	PSLF89_79	Acyltransferase family protein	-5.8184	6.77002	11.7647	Piscirickettsia salmonis LF-89 = ATCC VR-1361.	Bacteria; Proteobacteria; Gammaproteobacteria; Thiotrichales;Piscirickettsiaceae; Piscirickettsia.	1227812	PSLF89_79	chromosome	acyltransferase	acyltransferase family protein [Piscirickettsia salmonis]	I	(gi:146305053) hdtS (Pmen_0011) - phospholipid/glycerol acyltransferase [Pseudomonas mendocina str. ymp]	Regulation
A0A0J1JB43	ORFNames=AB894_09085, PSLF89_790	Uncharacterized protein	-4.8247	6.7832	5.34351	Piscirickettsia salmonis LF-89 = ATCC VR-1361.	Bacteria; Proteobacteria; Gammaproteobacteria; Thiotrichales;Piscirickettsiaceae; Piscirickettsia.	1227812	PSLF89_790	chromosome	hypothetical protein	hypothetical protein [Piscirickettsia salmonis]_x0001_gb|KGP95298.1| kinase domain protein [Piscirickettsia salmonis]	No orthologs found
U4TB84	K661_01675	Hydrolase, TatD family protein	-6.56598	6.56144	15.8301	Piscirickettsia salmonis LF-89 = ATCC VR-1361.	Bacteria; Proteobacteria; Gammaproteobacteria; Thiotrichales;Piscirickettsiaceae; Piscirickettsia.	1227812	PSLF89_796	chromosome	hydrolase TatD	hypothetical protein [Piscirickettsia salmonis]_x0001_gb|KGP95303.1| hydrolase, TatD family protein [Piscirickettsia salmonis]	N
A0A0J1M1D4	bdhA	3-hydroxybutyrate dehydrogenase	-4.04864	7.33705	8.36502	Piscirickettsia salmonis LF-89 = ATCC VR-1361.	Bacteria; Proteobacteria; Gammaproteobacteria; Thiotrichales;Piscirickettsiaceae; Piscirickettsia.	1227812	PSLF89_799	chromosome	3-hydroxybutyrate dehydrogenase	hypothetical protein [Piscirickettsia salmonis]_x0001_gb|KGP95306.1| short chain dehydrogenase family protein [Piscirickettsia salmonis]	IQR
A0A0H4RE05	glyS	Glycine--tRNA ligase beta subunit	-4.44032	5.95872	2.89017	Piscirickettsia salmonis LF-89 = ATCC VR-1361.	Bacteria; Proteobacteria; Gammaproteobacteria; Thiotrichales;Piscirickettsiaceae; Piscirickettsia.	1227812	PSLF89_82	chromosome	glycine--tRNA ligase subunit beta	hypothetical protein [Piscirickettsia salmonis]_x0001_gb|KGP95696.1| glycyl-tRNA synthetase beta subunit [Piscirickettsia salmonis]	J
A0A0J1JFN3	recD2	ATP-dependent RecD-like DNA helicase	-7.28863	6.38996	2.1978	Piscirickettsia salmonis LF-89 = ATCC VR-1361.	Bacteria; Proteobacteria; Gammaproteobacteria; Thiotrichales;Piscirickettsiaceae; Piscirickettsia.	1227812	PSLF89_83	chromosome	glycine--tRNA ligase subunit alpha	glycyl-tRNA synthetase [Piscirickettsia salmonis]_x0001_gb|KGP95695.1| glycyl-tRNA synthetase [Piscirickettsia salmonis]	J
A0A0H4R154	PSLF89_830	Uncharacterized protein	-4.18664	6.26918	59.375	Piscirickettsia salmonis LF-89 = ATCC VR-1361.	Bacteria; Proteobacteria; Gammaproteobacteria; Thiotrichales;Piscirickettsiaceae; Piscirickettsia.	1227812	PSLF89_830	chromosome	hypothetical protein	hypothetical protein [Piscirickettsia salmonis]	No orthologs found
U4T9L2	K661_02829	Uncharacterized protein	-4.24601	6.25509	2.60771	Piscirickettsia salmonis LF-89 = ATCC VR-1361.	Bacteria; Proteobacteria; Gammaproteobacteria; Thiotrichales;Piscirickettsiaceae; Piscirickettsia.	1227812	PSLF89_849	chromosome	hypothetical protein	hypothetical protein KU39_01758 [Piscirickettsia salmonis]	No orthologs found
A0A0J1JAM5	AB894_09975	Histidine kinase	-10.2024	6.83526	7.42857	Piscirickettsia salmonis LF-89 = ATCC VR-1361.	Bacteria; Proteobacteria; Gammaproteobacteria; Thiotrichales;Piscirickettsiaceae; Piscirickettsia.	1227812	PSLF89_856	chromosome	histidine kinase	hypothetical protein [Piscirickettsia salmonis]_x0001_gb|KGP96320.1| HAMP domain protein [Piscirickettsia salmonis]	T	(gi:15826988) mprB (ML0175) - putative two-component system sensor kinase [Mycobacterium leprae str. TN]	Regulation
A0A0H4RFW9	PSLF89_858	Uncharacterized protein	-4.23604	6.12563	4.14201	Piscirickettsia salmonis LF-89 = ATCC VR-1361.	Bacteria; Proteobacteria; Gammaproteobacteria; Thiotrichales;Piscirickettsiaceae; Piscirickettsia.	1227812	PSLF89_858	chromosome	methyltransferase	hypothetical protein [Piscirickettsia salmonis]	R
U4TBN8	K661_02885	Methyl-accepting chemotaxis (MCP) signaling domain protein	-4.39894	7.63154	4.84429	Piscirickettsia salmonis LF-89 = ATCC VR-1361.	Bacteria; Proteobacteria; Gammaproteobacteria; Thiotrichales;Piscirickettsiaceae; Piscirickettsia.	1227812	PSLF89_872	chromosome	chemotaxis protein	chemotaxis protein [Piscirickettsia salmonis]_x0001_gb|KGP96853.1| chemotaxis protein [Piscirickettsia salmonis]	T		Chemotaxis
A0A0H4QZA1	PSLF89_875	Uncharacterized protein	-9.58665	7.62132	7.38462	Piscirickettsia salmonis LF-89 = ATCC VR-1361.	Bacteria; Proteobacteria; Gammaproteobacteria; Thiotrichales;Piscirickettsiaceae; Piscirickettsia.	1227812	PSLF89_875	chromosome	penicillin-binding protein activator LpoB	hypothetical protein [Piscirickettsia salmonis]_x0001_gb|KGP96850.1| curli production assembly/transport component CsgG family protein[Piscirickettsia salmonis]	No orthologs found
A0A0H4QYY9	sdhA	Succinate dehydrogenase flavoprotein subunit	-4.50314	6.12363	5.45145	Piscirickettsia salmonis LF-89 = ATCC VR-1361.	Bacteria; Proteobacteria; Gammaproteobacteria; Thiotrichales;Piscirickettsiaceae; Piscirickettsia.	1227812	PSLF89_896	chromosome	succinate dehydrogenase	hypothetical protein [Piscirickettsia salmonis]_x0001_gb|KGP96829.1| succinate dehydrogenase, flavoprotein subunit [Piscirickettsia salmonis]	C
U4TGW9	sucB	Dihydrolipoyllysine-residue succinyltransferase, E2 component of oxoglutarate dehydrogenase	-6.44577	5.93104	2.09424	Piscirickettsia salmonis LF-89 = ATCC VR-1361.	Bacteria; Proteobacteria; Gammaproteobacteria; Thiotrichales;Piscirickettsiaceae; Piscirickettsia.	1227812	PSLF89_899	chromosome	dihydrolipoamide succinyltransferase	hypothetical protein [Piscirickettsia salmonis]_x0001_gb|KGP96826.1| dihydrolipoyllysine-residue succinyltransferase, E2 component of oxoglutarate dehydrogenase [Piscirickettsia salmonis]	C
U4TJM2	feoB	Ferrous iron transport protein B	-4.93215	6.7456	5.42636	Piscirickettsia salmonis LF-89 = ATCC VR-1361.	Bacteria; Proteobacteria; Gammaproteobacteria; Thiotrichales;Piscirickettsiaceae; Piscirickettsia.	1227812	PSLF89_908	chromosome	ferrous iron transporter B	ferrous iron transporter B [Piscirickettsia salmonis]_x0001_gb|KGP96016.1| ferrous iron transporter B [Piscirickettsia salmonis]	P	(gi:52842863) feoB (lpg2657) - ferrous iron transporter B [Legionella pneumophila str. Philadelphia 1]	Metal uptake and heme acquisition
U4TDD3	efp	Translation elongation factor P	-5.01616	8.04426	12.6984	Piscirickettsia salmonis LF-89 = ATCC VR-1361.	Bacteria; Proteobacteria; Gammaproteobacteria; Thiotrichales;Piscirickettsiaceae; Piscirickettsia.	1227812	PSLF89_925	chromosome	elongation factor P	elongation factor P [Piscirickettsia salmonis]_x0001_gb|KGP96800.1| elongation factor P [Piscirickettsia salmonis]	J
A0A0H4QXH8	pheS	Phenylalanine--tRNA ligase alpha subunit	-4.06598	7.7925	3.92749	Piscirickettsia salmonis LF-89 = ATCC VR-1361.	Bacteria; Proteobacteria; Gammaproteobacteria; Thiotrichales;Piscirickettsiaceae; Piscirickettsia.	1227812	PSLF89_946	chromosome	phenylalanine--tRNA ligase subunit alpha	phenylalanyl-tRNA synthetase subunit alpha [Piscirickettsia salmonis]_x0001_gb|KGP96780.1| phenylalanine--tRNA ligase, alpha subunit [Piscirickettsia salmonis]	J
A0A0H4RG51	pheT	Phenylalanine--tRNA ligase beta subunit	-8.29468	7.11505	5.29634	Piscirickettsia salmonis LF-89 = ATCC VR-1361.	Bacteria; Proteobacteria; Gammaproteobacteria; Thiotrichales;Piscirickettsiaceae; Piscirickettsia.	1227812	PSLF89_947	chromosome	phenylalanine--tRNA ligase subunit beta	hypothetical protein [Piscirickettsia salmonis]_x0001_gb|KGP96779.1| phenylalanine--tRNA ligase, beta subunit [Piscirickettsia salmonis]	J
U4TD26	K661_01572	Uncharacterized protein	-7.1916	7.27387	4.34783	Piscirickettsia salmonis LF-89 = ATCC VR-1361.	Bacteria; Proteobacteria; Gammaproteobacteria; Thiotrichales;Piscirickettsiaceae; Piscirickettsia.	1227812	PSLF89_980	chromosome	hypothetical protein	hypothetical protein [Piscirickettsia salmonis]	No orthologs found
U4TF78	K661_03318	Uncharacterized protein	-4.39083	7.10646	60.274	Piscirickettsia salmonis LF-89 = ATCC VR-1361.	Bacteria; Proteobacteria; Gammaproteobacteria; Thiotrichales;Piscirickettsiaceae; Piscirickettsia.	1227812	PSLF89_99	chromosome	hypothetical protein	hypothetical protein [Piscirickettsia salmonis]_x0001_gb|KGP97513.1| hypothetical protein KU39_00856 [Piscirickettsia salmonis]	No orthologs found
									3.64146

## Sheet: SHK.Vacuolization vs.Control
Protein	Gene name	Description	log10 Average Intensity	log 2 Ratio vacuolization/control	Fold Change vacuolization/control	best E-value	up_os	up_oc	ncbi_taxid
C0HBI8	PPCE	Prolyl endopeptidase	7.4065	-8.92149	-484.881	-8.76955	Salmo salar (Atlantic salmon).	Eukaryota; Metazoa; Chordata; Craniata; Vertebrata; Euteleostomi;Actinopterygii; Neopterygii; Teleostei; Protacanthopterygii;Salmoniformes; Salmonidae; Salmoninae; Salmo.	8030
B5XFP5	ROA0	Heterogeneous nuclear ribonucleoprotein A0	7.66195	-5.18603	-36.404	-91.7147	Salmo salar (Atlantic salmon).	Eukaryota; Metazoa; Chordata; Craniata; Vertebrata; Euteleostomi;Actinopterygii; Neopterygii; Teleostei; Protacanthopterygii;Salmoniformes; Salmonidae; Salmoninae; Salmo.	8030
Q2QEY8	Sasa-UCA/UDA	MHC class I alpha 1 antigen	7.18882	-4.53927	-23.2518	-4.31992	Salmo salar (Atlantic salmon).	Eukaryota; Metazoa; Chordata; Craniata; Vertebrata; Euteleostomi;Actinopterygii; Neopterygii; Teleostei; Protacanthopterygii;Salmoniformes; Salmonidae; Salmoninae; Salmo.	8030
B5DG94	ppia1	Peptidyl-prolyl cis-trans isomerase	7.83465	-4.30501	-19.7669	-157.238	Salmo salar (Atlantic salmon).	Eukaryota; Metazoa; Chordata; Craniata; Vertebrata; Euteleostomi;Actinopterygii; Neopterygii; Teleostei; Protacanthopterygii;Salmoniformes; Salmonidae; Salmoninae; Salmo.	8030
C0H7H1	RS6	40S ribosomal protein S6	7.54058	-3.5937	-12.0729	-70.3733	Salmo salar (Atlantic salmon).	Eukaryota; Metazoa; Chordata; Craniata; Vertebrata; Euteleostomi;Actinopterygii; Neopterygii; Teleostei; Protacanthopterygii;Salmoniformes; Salmonidae; Salmoninae; Salmo.	8030
B9EPT4	PPIA	Peptidyl-prolyl cis-trans isomerase	7.84537	-3.48491	-11.196	-105.489	Salmo salar (Atlantic salmon).	Eukaryota; Metazoa; Chordata; Craniata; Vertebrata; Euteleostomi;Actinopterygii; Neopterygii; Teleostei; Protacanthopterygii;Salmoniformes; Salmonidae; Salmoninae; Salmo.	8030
B5RI17	cct3	T-complex protein 1 subunit gamma	7.24263	-3.46863	-11.0704	-43.4323	Salmo salar (Atlantic salmon).	Eukaryota; Metazoa; Chordata; Craniata; Vertebrata; Euteleostomi;Actinopterygii; Neopterygii; Teleostei; Protacanthopterygii;Salmoniformes; Salmonidae; Salmoninae; Salmo.	8030
B5XGF6	IPYR2	Inorganic pyrophosphatase 2, mitochondrial	7.68906	-3.3831	-10.4332	-66.3462	Salmo salar (Atlantic salmon).	Eukaryota; Metazoa; Chordata; Craniata; Vertebrata; Euteleostomi;Actinopterygii; Neopterygii; Teleostei; Protacanthopterygii;Salmoniformes; Salmonidae; Salmoninae; Salmo.	8030
B5DGV7	rl26	60S ribosomal protein L26	7.90024	-3.34932	-10.1917	-51.1577	Salmo salar (Atlantic salmon).	Eukaryota; Metazoa; Chordata; Craniata; Vertebrata; Euteleostomi;Actinopterygii; Neopterygii; Teleostei; Protacanthopterygii;Salmoniformes; Salmonidae; Salmoninae; Salmo.	8030
B5XCE7	ANXA4	Annexin	7.27383	-3.34799	-10.1823	-140.92	Salmo salar (Atlantic salmon).	Eukaryota; Metazoa; Chordata; Craniata; Vertebrata; Euteleostomi;Actinopterygii; Neopterygii; Teleostei; Protacanthopterygii;Salmoniformes; Salmonidae; Salmoninae; Salmo.	8030
B9EPF1	PSME1	Proteasome activator complex subunit 1	7.67278	-3.26457	-9.61022	-26.9832	Salmo salar (Atlantic salmon).	Eukaryota; Metazoa; Chordata; Craniata; Vertebrata; Euteleostomi;Actinopterygii; Neopterygii; Teleostei; Protacanthopterygii;Salmoniformes; Salmonidae; Salmoninae; Salmo.	8030
C0HA39	HNRL1	Heterogeneous nuclear ribonucleoprotein U-like protein 1	6.69915	-2.96149	-7.7893	-11.4024	Salmo salar (Atlantic salmon).	Eukaryota; Metazoa; Chordata; Craniata; Vertebrata; Euteleostomi;Actinopterygii; Neopterygii; Teleostei; Protacanthopterygii;Salmoniformes; Salmonidae; Salmoninae; Salmo.	8030
B5XD07	UB2L3	Ubiquitin-conjugating enzyme E2 L3	6.9086	-2.92989	-7.62054	-32.6844	Salmo salar (Atlantic salmon).	Eukaryota; Metazoa; Chordata; Craniata; Vertebrata; Euteleostomi;Actinopterygii; Neopterygii; Teleostei; Protacanthopterygii;Salmoniformes; Salmonidae; Salmoninae; Salmo.	8030
B5X1A8	RUFY2	RUN and FYVE domain-containing protein 2	6.79184	-2.89676	-7.44749	-4.41933	Salmo salar (Atlantic salmon).	Eukaryota; Metazoa; Chordata; Craniata; Vertebrata; Euteleostomi;Actinopterygii; Neopterygii; Teleostei; Protacanthopterygii;Salmoniformes; Salmonidae; Salmoninae; Salmo.	8030
B5DGK9	rps20	40S ribosomal protein S20	7.15307	-2.69876	-6.49246	-44.4595	Salmo salar (Atlantic salmon).	Eukaryota; Metazoa; Chordata; Craniata; Vertebrata; Euteleostomi;Actinopterygii; Neopterygii; Teleostei; Protacanthopterygii;Salmoniformes; Salmonidae; Salmoninae; Salmo.	8030
B5X1B9	MEPD	Thimet oligopeptidase	6.49196	-2.60512	-6.08443	-11.2835	Salmo salar (Atlantic salmon).	Eukaryota; Metazoa; Chordata; Craniata; Vertebrata; Euteleostomi;Actinopterygii; Neopterygii; Teleostei; Protacanthopterygii;Salmoniformes; Salmonidae; Salmoninae; Salmo.	8030
B5X4G1	F10A1	Hsc70-interacting protein	6.82906	-2.5537	-5.87138	-14.6159	Salmo salar (Atlantic salmon).	Eukaryota; Metazoa; Chordata; Craniata; Vertebrata; Euteleostomi;Actinopterygii; Neopterygii; Teleostei; Protacanthopterygii;Salmoniformes; Salmonidae; Salmoninae; Salmo.	8030
C0H8W3	AL3A2	Aldehyde dehydrogenase	6.66876	-2.55125	-5.86142	-21.1309	Salmo salar (Atlantic salmon).	Eukaryota; Metazoa; Chordata; Craniata; Vertebrata; Euteleostomi;Actinopterygii; Neopterygii; Teleostei; Protacanthopterygii;Salmoniformes; Salmonidae; Salmoninae; Salmo.	8030
B5X1Z2	TCPD	T-complex protein 1 subunit delta	7.3977	-2.52302	-5.74785	-123.281	Salmo salar (Atlantic salmon).	Eukaryota; Metazoa; Chordata; Craniata; Vertebrata; Euteleostomi;Actinopterygii; Neopterygii; Teleostei; Protacanthopterygii;Salmoniformes; Salmonidae; Salmoninae; Salmo.	8030
B5DGM5	KAD	Adenylate kinase isoenzyme 1	8.97487	-2.45761	-5.49305	-9.59663	Salmo salar (Atlantic salmon).	Eukaryota; Metazoa; Chordata; Craniata; Vertebrata; Euteleostomi;Actinopterygii; Neopterygii; Teleostei; Protacanthopterygii;Salmoniformes; Salmonidae; Salmoninae; Salmo.	8030
C0H820	MDHC	Malate dehydrogenase	7.13347	-2.43085	-5.3921	-53.8956	Salmo salar (Atlantic salmon).	Eukaryota; Metazoa; Chordata; Craniata; Vertebrata; Euteleostomi;Actinopterygii; Neopterygii; Teleostei; Protacanthopterygii;Salmoniformes; Salmonidae; Salmoninae; Salmo.	8030
B5X346	MTCH2	Mitochondrial carrier homolog 2	6.23728	-2.37867	-5.20058	-12.0835	Salmo salar (Atlantic salmon).	Eukaryota; Metazoa; Chordata; Craniata; Vertebrata; Euteleostomi;Actinopterygii; Neopterygii; Teleostei; Protacanthopterygii;Salmoniformes; Salmonidae; Salmoninae; Salmo.	8030
C0HAB5	CAN1	Calpain-1 catalytic subunit	6.82571	-2.27963	-4.85554	-22.2767	Salmo salar (Atlantic salmon).	Eukaryota; Metazoa; Chordata; Craniata; Vertebrata; Euteleostomi;Actinopterygii; Neopterygii; Teleostei; Protacanthopterygii;Salmoniformes; Salmonidae; Salmoninae; Salmo.	8030
B5XDA7	RL23A	60S ribosomal protein L23a	7.27059	-2.16992	-4.49998	-44.5226	Salmo salar (Atlantic salmon).	Eukaryota; Metazoa; Chordata; Craniata; Vertebrata; Euteleostomi;Actinopterygii; Neopterygii; Teleostei; Protacanthopterygii;Salmoniformes; Salmonidae; Salmoninae; Salmo.	8030
B5DGX3	RS15A	40S ribosomal protein S15a	7.57242	-2.10271	-4.29516	-48.7865	Salmo salar (Atlantic salmon).	Eukaryota; Metazoa; Chordata; Craniata; Vertebrata; Euteleostomi;Actinopterygii; Neopterygii; Teleostei; Protacanthopterygii;Salmoniformes; Salmonidae; Salmoninae; Salmo.	8030
B5DGK7	rps8	40S ribosomal protein S8	7.68993	-2.09803	-4.28126	-79.5477	Salmo salar (Atlantic salmon).	Eukaryota; Metazoa; Chordata; Craniata; Vertebrata; Euteleostomi;Actinopterygii; Neopterygii; Teleostei; Protacanthopterygii;Salmoniformes; Salmonidae; Salmoninae; Salmo.	8030
B5DGX1	RS14	40S ribosomal protein S14	6.93296	-1.97063	-3.9194	-16.9645	Salmo salar (Atlantic salmon).	Eukaryota; Metazoa; Chordata; Craniata; Vertebrata; Euteleostomi;Actinopterygii; Neopterygii; Teleostei; Protacanthopterygii;Salmoniformes; Salmonidae; Salmoninae; Salmo.	8030
B5X5Q6	PRDX5	Peroxiredoxin-5, mitochondrial	7.19201	-1.93971	-3.83628	-15.7152	Salmo salar (Atlantic salmon).	Eukaryota; Metazoa; Chordata; Craniata; Vertebrata; Euteleostomi;Actinopterygii; Neopterygii; Teleostei; Protacanthopterygii;Salmoniformes; Salmonidae; Salmoninae; Salmo.	8030
B5X369	RL17	60S ribosomal protein L17	7.55258	-1.8825	-3.68715	-46.1033	Salmo salar (Atlantic salmon).	Eukaryota; Metazoa; Chordata; Craniata; Vertebrata; Euteleostomi;Actinopterygii; Neopterygii; Teleostei; Protacanthopterygii;Salmoniformes; Salmonidae; Salmoninae; Salmo.	8030
B5X4M2	TCPQ	T-complex protein 1 subunit theta	7.33835	-1.83036	-3.55627	-97.8082	Salmo salar (Atlantic salmon).	Eukaryota; Metazoa; Chordata; Craniata; Vertebrata; Euteleostomi;Actinopterygii; Neopterygii; Teleostei; Protacanthopterygii;Salmoniformes; Salmonidae; Salmoninae; Salmo.	8030
B5X3Z4	SFRS2	Splicing factor, arginine/serine-rich 2	6.52433	-1.81002	-3.50648	-17.3907	Salmo salar (Atlantic salmon).	Eukaryota; Metazoa; Chordata; Craniata; Vertebrata; Euteleostomi;Actinopterygii; Neopterygii; Teleostei; Protacanthopterygii;Salmoniformes; Salmonidae; Salmoninae; Salmo.	8030
B5X120	NU107	Nuclear pore complex protein Nup107	7.16294	-1.62143	-3.0768	-5.40066	Salmo salar (Atlantic salmon).	Eukaryota; Metazoa; Chordata; Craniata; Vertebrata; Euteleostomi;Actinopterygii; Neopterygii; Teleostei; Protacanthopterygii;Salmoniformes; Salmonidae; Salmoninae; Salmo.	8030
C0PUF3	PYGB	Alpha-1,4 glucan phosphorylase	5.87543	-1.60599	-3.04405	-12.8927	Salmo salar (Atlantic salmon).	Eukaryota; Metazoa; Chordata; Craniata; Vertebrata; Euteleostomi;Actinopterygii; Neopterygii; Teleostei; Protacanthopterygii;Salmoniformes; Salmonidae; Salmoninae; Salmo.	8030
B5X9C6	ALDR	Aldose reductase	7.99898	-1.56443	-2.95761	-125.327	Salmo salar (Atlantic salmon).	Eukaryota; Metazoa; Chordata; Craniata; Vertebrata; Euteleostomi;Actinopterygii; Neopterygii; Teleostei; Protacanthopterygii;Salmoniformes; Salmonidae; Salmoninae; Salmo.	8030
B5DG42	eif4a3	Eukaryotic initiation factor 4A-III	6.98168	-1.5279	-2.88366	-11.6906	Salmo salar (Atlantic salmon).	Eukaryota; Metazoa; Chordata; Craniata; Vertebrata; Euteleostomi;Actinopterygii; Neopterygii; Teleostei; Protacanthopterygii;Salmoniformes; Salmonidae; Salmoninae; Salmo.	8030
B5X4C0	TPM3	Tropomyosin alpha-3 chain	9.55921	-1.52366	-2.8752	-1029.91	Salmo salar (Atlantic salmon).	Eukaryota; Metazoa; Chordata; Craniata; Vertebrata; Euteleostomi;Actinopterygii; Neopterygii; Teleostei; Protacanthopterygii;Salmoniformes; Salmonidae; Salmoninae; Salmo.	8030
B5X6R2	RL35	60S ribosomal protein L35	7.04745	-1.4439	-2.72055	-14.0908	Salmo salar (Atlantic salmon).	Eukaryota; Metazoa; Chordata; Craniata; Vertebrata; Euteleostomi;Actinopterygii; Neopterygii; Teleostei; Protacanthopterygii;Salmoniformes; Salmonidae; Salmoninae; Salmo.	8030
C0H8T3	FAKD1	FAST kinase domain-containing protein 1	6.62252	-1.44163	-2.71627	-4.53744	Salmo salar (Atlantic salmon).	Eukaryota; Metazoa; Chordata; Craniata; Vertebrata; Euteleostomi;Actinopterygii; Neopterygii; Teleostei; Protacanthopterygii;Salmoniformes; Salmonidae; Salmoninae; Salmo.	8030
C0HA19	VIGLN	Vigilin	6.6706	-1.43088	-2.69611	-70.8272	Salmo salar (Atlantic salmon).	Eukaryota; Metazoa; Chordata; Craniata; Vertebrata; Euteleostomi;Actinopterygii; Neopterygii; Teleostei; Protacanthopterygii;Salmoniformes; Salmonidae; Salmoninae; Salmo.	8030
B5X348	IREB1	Aconitate hydratase	6.65555	-1.3798	-2.60232	-9.45872	Salmo salar (Atlantic salmon).	Eukaryota; Metazoa; Chordata; Craniata; Vertebrata; Euteleostomi;Actinopterygii; Neopterygii; Teleostei; Protacanthopterygii;Salmoniformes; Salmonidae; Salmoninae; Salmo.	8030
B5DGJ6	rpl3	Ribosomal protein L3	8.03978	-1.3281	-2.51071	-129.93	Salmo salar (Atlantic salmon).	Eukaryota; Metazoa; Chordata; Craniata; Vertebrata; Euteleostomi;Actinopterygii; Neopterygii; Teleostei; Protacanthopterygii;Salmoniformes; Salmonidae; Salmoninae; Salmo.	8030
C0H9L8	VPS35	Vacuolar protein sorting-associated protein 35	6.82002	-1.24874	-2.37634	-16.9996	Salmo salar (Atlantic salmon).	Eukaryota; Metazoa; Chordata; Craniata; Vertebrata; Euteleostomi;Actinopterygii; Neopterygii; Teleostei; Protacanthopterygii;Salmoniformes; Salmonidae; Salmoninae; Salmo.	8030
B5DGU1	pk	Pyruvate kinase	7.8518	-1.24159	-2.36458	-72.1919	Salmo salar (Atlantic salmon).	Eukaryota; Metazoa; Chordata; Craniata; Vertebrata; Euteleostomi;Actinopterygii; Neopterygii; Teleostei; Protacanthopterygii;Salmoniformes; Salmonidae; Salmoninae; Salmo.	8030
B5DGV2	RL10A	Ribosomal protein	7.03477	-1.23193	-2.34881	-64.5348	Salmo salar (Atlantic salmon).	Eukaryota; Metazoa; Chordata; Craniata; Vertebrata; Euteleostomi;Actinopterygii; Neopterygii; Teleostei; Protacanthopterygii;Salmoniformes; Salmonidae; Salmoninae; Salmo.	8030
B5X1N7	IMMT	Mitochondrial inner membrane protein	6.83996	-1.19567	-2.29051	-24.1704	Salmo salar (Atlantic salmon).	Eukaryota; Metazoa; Chordata; Craniata; Vertebrata; Euteleostomi;Actinopterygii; Neopterygii; Teleostei; Protacanthopterygii;Salmoniformes; Salmonidae; Salmoninae; Salmo.	8030
B5X7X7	PRDX1	Peroxiredoxin-1	6.77204	-1.19333	-2.2868	-15.3482	Salmo salar (Atlantic salmon).	Eukaryota; Metazoa; Chordata; Craniata; Vertebrata; Euteleostomi;Actinopterygii; Neopterygii; Teleostei; Protacanthopterygii;Salmoniformes; Salmonidae; Salmoninae; Salmo.	8030
C0PU58	PDIA1	Protein disulfide-isomerase	7.7264	-1.17325	-2.25519	-192.701	Salmo salar (Atlantic salmon).	Eukaryota; Metazoa; Chordata; Craniata; Vertebrata; Euteleostomi;Actinopterygii; Neopterygii; Teleostei; Protacanthopterygii;Salmoniformes; Salmonidae; Salmoninae; Salmo.	8030
B5X2M3	SEPT7	Septin-7	6.90955	-1.16561	-2.24328	-41.8631	Salmo salar (Atlantic salmon).	Eukaryota; Metazoa; Chordata; Craniata; Vertebrata; Euteleostomi;Actinopterygii; Neopterygii; Teleostei; Protacanthopterygii;Salmoniformes; Salmonidae; Salmoninae; Salmo.	8030
B5X291	PDIA6	Disulfide-isomerase A6	7.20847	-1.13244	-2.19229	-71.697	Salmo salar (Atlantic salmon).	Eukaryota; Metazoa; Chordata; Craniata; Vertebrata; Euteleostomi;Actinopterygii; Neopterygii; Teleostei; Protacanthopterygii;Salmoniformes; Salmonidae; Salmoninae; Salmo.	8030
B5X2S2	TPM4	Tropomyosin alpha-4 chain	9.64356	-1.10849	-2.1562	-1059.11	Salmo salar (Atlantic salmon).	Eukaryota; Metazoa; Chordata; Craniata; Vertebrata; Euteleostomi;Actinopterygii; Neopterygii; Teleostei; Protacanthopterygii;Salmoniformes; Salmonidae; Salmoninae; Salmo.	8030
B5XEW6	RS9	40S ribosomal protein S9	7.4015	-1.08757	-2.12515	-16.0368	Salmo salar (Atlantic salmon).	Eukaryota; Metazoa; Chordata; Craniata; Vertebrata; Euteleostomi;Actinopterygii; Neopterygii; Teleostei; Protacanthopterygii;Salmoniformes; Salmonidae; Salmoninae; Salmo.	8030
B9EMQ6	PCNA	Proliferating cell nuclear antigen	6.26784	-1.07399	-2.10524	-11.3188	Salmo salar (Atlantic salmon).	Eukaryota; Metazoa; Chordata; Craniata; Vertebrata; Euteleostomi;Actinopterygii; Neopterygii; Teleostei; Protacanthopterygii;Salmoniformes; Salmonidae; Salmoninae; Salmo.	8030
B5X0U6	PGK	Phosphoglycerate kinase	7.50117	-1.07321	-2.10412	-55.2468	Salmo salar (Atlantic salmon).	Eukaryota; Metazoa; Chordata; Craniata; Vertebrata; Euteleostomi;Actinopterygii; Neopterygii; Teleostei; Protacanthopterygii;Salmoniformes; Salmonidae; Salmoninae; Salmo.	8030
B5X6X8	RS24	40S ribosomal protein S24	6.82976	-1.05836	-2.08257	-33.5768	Salmo salar (Atlantic salmon).	Eukaryota; Metazoa; Chordata; Craniata; Vertebrata; Euteleostomi;Actinopterygii; Neopterygii; Teleostei; Protacanthopterygii;Salmoniformes; Salmonidae; Salmoninae; Salmo.	8030
B9ENC8	TAGL	Transgelin	8.37407	-1.02439	-2.0341	-344.048	Salmo salar (Atlantic salmon).	Eukaryota; Metazoa; Chordata; Craniata; Vertebrata; Euteleostomi;Actinopterygii; Neopterygii; Teleostei; Protacanthopterygii;Salmoniformes; Salmonidae; Salmoninae; Salmo.	8030
C0HAA0	K6PP	ATP-dependent 6-phosphofructokinase	6.56603	-1.01949	-2.0272	-23.7832	Salmo salar (Atlantic salmon).	Eukaryota; Metazoa; Chordata; Craniata; Vertebrata; Euteleostomi;Actinopterygii; Neopterygii; Teleostei; Protacanthopterygii;Salmoniformes; Salmonidae; Salmoninae; Salmo.	8030
B9EMD3	TBCA	Tubulin-specific chaperone A	6.80608	-1.01286	-2.01791	-51.575	Salmo salar (Atlantic salmon).	Eukaryota; Metazoa; Chordata; Craniata; Vertebrata; Euteleostomi;Actinopterygii; Neopterygii; Teleostei; Protacanthopterygii;Salmoniformes; Salmonidae; Salmoninae; Salmo.	8030
C0HBD9	EF2	Elongation factor 2	7.93864	-0.972959	-1.96286	-127.231	Salmo salar (Atlantic salmon).	Eukaryota; Metazoa; Chordata; Craniata; Vertebrata; Euteleostomi;Actinopterygii; Neopterygii; Teleostei; Protacanthopterygii;Salmoniformes; Salmonidae; Salmoninae; Salmo.	8030
B5DFX8	pgk1	Phosphoglycerate kinase	7.58419	-0.970827	-1.95996	-73.2953	Salmo salar (Atlantic salmon).	Eukaryota; Metazoa; Chordata; Craniata; Vertebrata; Euteleostomi;Actinopterygii; Neopterygii; Teleostei; Protacanthopterygii;Salmoniformes; Salmonidae; Salmoninae; Salmo.	8030
B5X4K2	CNDP2	Cytosolic non-specific dipeptidase	7.33056	-0.967806	-1.95586	-78.665	Salmo salar (Atlantic salmon).	Eukaryota; Metazoa; Chordata; Craniata; Vertebrata; Euteleostomi;Actinopterygii; Neopterygii; Teleostei; Protacanthopterygii;Salmoniformes; Salmonidae; Salmoninae; Salmo.	8030
Q78BU2	actc1-1	Actin alpha 1-1	9.10622	-0.967425	-1.95535	-1335.38	Salmo salar (Atlantic salmon).	Eukaryota; Metazoa; Chordata; Craniata; Vertebrata; Euteleostomi;Actinopterygii; Neopterygii; Teleostei; Protacanthopterygii;Salmoniformes; Salmonidae; Salmoninae; Salmo.	8030
B5X3F7	TYPH	Thymidine phosphorylase	8.00227	-0.960793	-1.94638	-185.23	Salmo salar (Atlantic salmon).	Eukaryota; Metazoa; Chordata; Craniata; Vertebrata; Euteleostomi;Actinopterygii; Neopterygii; Teleostei; Protacanthopterygii;Salmoniformes; Salmonidae; Salmoninae; Salmo.	8030
B5DGS2	IDHP	Isocitrate dehydrogenase [NADP]	7.16407	-0.951115	-1.93337	-36.8784	Salmo salar (Atlantic salmon).	Eukaryota; Metazoa; Chordata; Craniata; Vertebrata; Euteleostomi;Actinopterygii; Neopterygii; Teleostei; Protacanthopterygii;Salmoniformes; Salmonidae; Salmoninae; Salmo.	8030
B5DG40		Fast myotomal muscle actin 2	9.09572	-0.917239	-1.8885	-1348.43	Salmo salar (Atlantic salmon).	Eukaryota; Metazoa; Chordata; Craniata; Vertebrata; Euteleostomi;Actinopterygii; Neopterygii; Teleostei; Protacanthopterygii;Salmoniformes; Salmonidae; Salmoninae; Salmo.	8030
B5RI28	psmc1a	Proteasome (Prosome, macropain) 26S subunit, ATPase 1a	6.54907	-0.876852	-1.83636	-28.4796	Salmo salar (Atlantic salmon).	Eukaryota; Metazoa; Chordata; Craniata; Vertebrata; Euteleostomi;Actinopterygii; Neopterygii; Teleostei; Protacanthopterygii;Salmoniformes; Salmonidae; Salmoninae; Salmo.	8030
C0HAC7	PRS4	26S protease regulatory subunit 4	6.54907	-0.876852	-1.83636	-28.4796	Salmo salar (Atlantic salmon).	Eukaryota; Metazoa; Chordata; Craniata; Vertebrata; Euteleostomi;Actinopterygii; Neopterygii; Teleostei; Protacanthopterygii;Salmoniformes; Salmonidae; Salmoninae; Salmo.	8030
B5DGB9	ywhab2	14-3-3 protein beta/alpha-2	7.70954	-0.857131	-1.81143	-149.28	Salmo salar (Atlantic salmon).	Eukaryota; Metazoa; Chordata; Craniata; Vertebrata; Euteleostomi;Actinopterygii; Neopterygii; Teleostei; Protacanthopterygii;Salmoniformes; Salmonidae; Salmoninae; Salmo.	8030
B5X2M7	TWF1	Twinfilin-1	6.3469	-0.830303	-1.77806	-12.0477	Salmo salar (Atlantic salmon).	Eukaryota; Metazoa; Chordata; Craniata; Vertebrata; Euteleostomi;Actinopterygii; Neopterygii; Teleostei; Protacanthopterygii;Salmoniformes; Salmonidae; Salmoninae; Salmo.	8030
B5X1W5	ANX11	Annexin	7.1148	-0.80663	-1.74912	-47.9776	Salmo salar (Atlantic salmon).	Eukaryota; Metazoa; Chordata; Craniata; Vertebrata; Euteleostomi;Actinopterygii; Neopterygii; Teleostei; Protacanthopterygii;Salmoniformes; Salmonidae; Salmoninae; Salmo.	8030
C0PUI7	TKTL2	Transketolase-like protein 2	6.78356	-0.774683	-1.71081	-60.9955	Salmo salar (Atlantic salmon).	Eukaryota; Metazoa; Chordata; Craniata; Vertebrata; Euteleostomi;Actinopterygii; Neopterygii; Teleostei; Protacanthopterygii;Salmoniformes; Salmonidae; Salmoninae; Salmo.	8030
B5RIB0		Protein disulfide isomerase family A, member 3	7.85763	-0.77096	-1.7064	-127.533	Salmo salar (Atlantic salmon).	Eukaryota; Metazoa; Chordata; Craniata; Vertebrata; Euteleostomi;Actinopterygii; Neopterygii; Teleostei; Protacanthopterygii;Salmoniformes; Salmonidae; Salmoninae; Salmo.	8030
B5XFJ3	S10I	Protein S100	8.7652	-0.752642	-1.68488	-550.563	Salmo salar (Atlantic salmon).	Eukaryota; Metazoa; Chordata; Craniata; Vertebrata; Euteleostomi;Actinopterygii; Neopterygii; Teleostei; Protacanthopterygii;Salmoniformes; Salmonidae; Salmoninae; Salmo.	8030
B5X340	SYNC	Asparaginyl-tRNA synthetase, cytoplasmic	6.9456	-0.747806	-1.67924	-67.8672	Salmo salar (Atlantic salmon).	Eukaryota; Metazoa; Chordata; Craniata; Vertebrata; Euteleostomi;Actinopterygii; Neopterygii; Teleostei; Protacanthopterygii;Salmoniformes; Salmonidae; Salmoninae; Salmo.	8030
B5X499	SEPT2	Septin-2	7.32009	-0.659898	-1.57997	-48.9469	Salmo salar (Atlantic salmon).	Eukaryota; Metazoa; Chordata; Craniata; Vertebrata; Euteleostomi;Actinopterygii; Neopterygii; Teleostei; Protacanthopterygii;Salmoniformes; Salmonidae; Salmoninae; Salmo.	8030
C0PUT2	FLNA	Filamin-A	8.18811	-0.657484	-1.57733	-112.459	Salmo salar (Atlantic salmon).	Eukaryota; Metazoa; Chordata; Craniata; Vertebrata; Euteleostomi;Actinopterygii; Neopterygii; Teleostei; Protacanthopterygii;Salmoniformes; Salmonidae; Salmoninae; Salmo.	8030
C0H8G4	RL7A	60S ribosomal protein L7a	7.77794	-0.551019	-1.46512	-48.7136	Salmo salar (Atlantic salmon).	Eukaryota; Metazoa; Chordata; Craniata; Vertebrata; Euteleostomi;Actinopterygii; Neopterygii; Teleostei; Protacanthopterygii;Salmoniformes; Salmonidae; Salmoninae; Salmo.	8030
B5X8H5	TDX	Peroxiredoxin	8.4076	-0.549102	-1.46317	-190.881	Salmo salar (Atlantic salmon).	Eukaryota; Metazoa; Chordata; Craniata; Vertebrata; Euteleostomi;Actinopterygii; Neopterygii; Teleostei; Protacanthopterygii;Salmoniformes; Salmonidae; Salmoninae; Salmo.	8030
O42161	actb	Actin, cytoplasmic 1	9.37309	-0.515776	-1.42976	-2463.85	Salmo salar (Atlantic salmon).	Eukaryota; Metazoa; Chordata; Craniata; Vertebrata; Euteleostomi;Actinopterygii; Neopterygii; Teleostei; Protacanthopterygii;Salmoniformes; Salmonidae; Salmoninae; Salmo.	8030
B3SUD0	HoxA10ab	Homeobox protein HoxA10ab	6.61557	-0.473281	-1.38826	-24.2458	Salmo salar (Atlantic salmon).	Eukaryota; Metazoa; Chordata; Craniata; Vertebrata; Euteleostomi;Actinopterygii; Neopterygii; Teleostei; Protacanthopterygii;Salmoniformes; Salmonidae; Salmoninae; Salmo.	8030
B5X115	GLYG	Glycogenin-1	6.63615	-0.458124	-1.37375	-34.6142	Salmo salar (Atlantic salmon).	Eukaryota; Metazoa; Chordata; Craniata; Vertebrata; Euteleostomi;Actinopterygii; Neopterygii; Teleostei; Protacanthopterygii;Salmoniformes; Salmonidae; Salmoninae; Salmo.	8030
B9ENY6	NO29	Nucleoplasmin-like protein NO29	6.37139	-0.423313	-1.341	-13.2681	Salmo salar (Atlantic salmon).	Eukaryota; Metazoa; Chordata; Craniata; Vertebrata; Euteleostomi;Actinopterygii; Neopterygii; Teleostei; Protacanthopterygii;Salmoniformes; Salmonidae; Salmoninae; Salmo.	8030
B5X1Q8	ILEU	Leukocyte elastase inhibitor	7.54079	-0.387687	-1.30829	-58.6346	Salmo salar (Atlantic salmon).	Eukaryota; Metazoa; Chordata; Craniata; Vertebrata; Euteleostomi;Actinopterygii; Neopterygii; Teleostei; Protacanthopterygii;Salmoniformes; Salmonidae; Salmoninae; Salmo.	8030
C0H8V2	PSMD2	26S proteasome non-ATPase regulatory subunit 2	6.2631	-0.345165	-1.2703	-10.7823	Salmo salar (Atlantic salmon).	Eukaryota; Metazoa; Chordata; Craniata; Vertebrata; Euteleostomi;Actinopterygii; Neopterygii; Teleostei; Protacanthopterygii;Salmoniformes; Salmonidae; Salmoninae; Salmo.	8030
B5X326	PAIRB	Plasminogen activator inhibitor 1 RNA-binding protein	7.34779	-0.30429	-1.23481	-79.5745	Salmo salar (Atlantic salmon).	Eukaryota; Metazoa; Chordata; Craniata; Vertebrata; Euteleostomi;Actinopterygii; Neopterygii; Teleostei; Protacanthopterygii;Salmoniformes; Salmonidae; Salmoninae; Salmo.	8030
B5XCU8	ANXA1	Annexin	8.11923	-0.304282	-1.2348	-356.339	Salmo salar (Atlantic salmon).	Eukaryota; Metazoa; Chordata; Craniata; Vertebrata; Euteleostomi;Actinopterygii; Neopterygii; Teleostei; Protacanthopterygii;Salmoniformes; Salmonidae; Salmoninae; Salmo.	8030
B5X2P7	TPM1	Tropomyosin-1 alpha chain	9.72059	-0.300142	-1.23127	-1010.28	Salmo salar (Atlantic salmon).	Eukaryota; Metazoa; Chordata; Craniata; Vertebrata; Euteleostomi;Actinopterygii; Neopterygii; Teleostei; Protacanthopterygii;Salmoniformes; Salmonidae; Salmoninae; Salmo.	8030
Q91472	tpm1	Fast myotomal muscle tropomyosin	9.753	-0.290909	-1.22341	-809.981	Salmo salar (Atlantic salmon).	Eukaryota; Metazoa; Chordata; Craniata; Vertebrata; Euteleostomi;Actinopterygii; Neopterygii; Teleostei; Protacanthopterygii;Salmoniformes; Salmonidae; Salmoninae; Salmo.	8030
B5X331	PDLI1	PDZ and LIM domain protein 1	6.97224	-0.285883	-1.21916	-42.6686	Salmo salar (Atlantic salmon).	Eukaryota; Metazoa; Chordata; Craniata; Vertebrata; Euteleostomi;Actinopterygii; Neopterygii; Teleostei; Protacanthopterygii;Salmoniformes; Salmonidae; Salmoninae; Salmo.	8030
B5X8Z6	TCB2	Transposable element Tcb2 transposase	6.32048	-0.284996	-1.21841	-6.82249	Salmo salar (Atlantic salmon).	Eukaryota; Metazoa; Chordata; Craniata; Vertebrata; Euteleostomi;Actinopterygii; Neopterygii; Teleostei; Protacanthopterygii;Salmoniformes; Salmonidae; Salmoninae; Salmo.	8030
B5X1H7	PDIA3	Protein disulfide-isomerase	7.97607	-0.280515	-1.21463	-156.759	Salmo salar (Atlantic salmon).	Eukaryota; Metazoa; Chordata; Craniata; Vertebrata; Euteleostomi;Actinopterygii; Neopterygii; Teleostei; Protacanthopterygii;Salmoniformes; Salmonidae; Salmoninae; Salmo.	8030
B5DG56	capza2	Capping protein (Actin filament) muscle Z-line alpha 2	7.54404	-0.277253	-1.21189	-29.5737	Salmo salar (Atlantic salmon).	Eukaryota; Metazoa; Chordata; Craniata; Vertebrata; Euteleostomi;Actinopterygii; Neopterygii; Teleostei; Protacanthopterygii;Salmoniformes; Salmonidae; Salmoninae; Salmo.	8030
B5X1M6	THIC	Acetyl-CoA acetyltransferase, cytosolic	7.47252	-0.24683	-1.1866	-31.3591	Salmo salar (Atlantic salmon).	Eukaryota; Metazoa; Chordata; Craniata; Vertebrata; Euteleostomi;Actinopterygii; Neopterygii; Teleostei; Protacanthopterygii;Salmoniformes; Salmonidae; Salmoninae; Salmo.	8030
B9EMV3	NIF3L	NIF3-like protein 1	6.24249	-0.227457	-1.17077	-4.9768	Salmo salar (Atlantic salmon).	Eukaryota; Metazoa; Chordata; Craniata; Vertebrata; Euteleostomi;Actinopterygii; Neopterygii; Teleostei; Protacanthopterygii;Salmoniformes; Salmonidae; Salmoninae; Salmo.	8030
B5XD97	ATPB	ATP synthase subunit beta, mitochondrial	6.92044	-0.192114	-1.14244	-63.8484	Salmo salar (Atlantic salmon).	Eukaryota; Metazoa; Chordata; Craniata; Vertebrata; Euteleostomi;Actinopterygii; Neopterygii; Teleostei; Protacanthopterygii;Salmoniformes; Salmonidae; Salmoninae; Salmo.	8030
C0H9I5	ACTN1	Alpha-actinin-1	8.24047	-0.150977	-1.11032	-304.857	Salmo salar (Atlantic salmon).	Eukaryota; Metazoa; Chordata; Craniata; Vertebrata; Euteleostomi;Actinopterygii; Neopterygii; Teleostei; Protacanthopterygii;Salmoniformes; Salmonidae; Salmoninae; Salmo.	8030
Q9W6K6	hsp90 beta	Heat shock protein 90-beta 1	8.02451	-0.15081	-1.11019	-221.519	Salmo salar (Atlantic salmon).	Eukaryota; Metazoa; Chordata; Craniata; Vertebrata; Euteleostomi;Actinopterygii; Neopterygii; Teleostei; Protacanthopterygii;Salmoniformes; Salmonidae; Salmoninae; Salmo.	8030
B5RI93		Ribosomal protein L3-like	7.44969	-0.146969	-1.10724	-105.898	Salmo salar (Atlantic salmon).	Eukaryota; Metazoa; Chordata; Craniata; Vertebrata; Euteleostomi;Actinopterygii; Neopterygii; Teleostei; Protacanthopterygii;Salmoniformes; Salmonidae; Salmoninae; Salmo.	8030
B5XG87	RL11	60S ribosomal protein L11	7.26793	-0.141389	-1.10297	-5.47871	Salmo salar (Atlantic salmon).	Eukaryota; Metazoa; Chordata; Craniata; Vertebrata; Euteleostomi;Actinopterygii; Neopterygii; Teleostei; Protacanthopterygii;Salmoniformes; Salmonidae; Salmoninae; Salmo.	8030
B5XAS7	EIF3M	Eukaryotic translation initiation factor 3 subunit M	5.86279	-0.125027	-1.09053	-5.54591	Salmo salar (Atlantic salmon).	Eukaryota; Metazoa; Chordata; Craniata; Vertebrata; Euteleostomi;Actinopterygii; Neopterygii; Teleostei; Protacanthopterygii;Salmoniformes; Salmonidae; Salmoninae; Salmo.	8030
C0H9I1	ALDOA	Fructose-bisphosphate aldolase	7.02213	-0.106303	-1.07647	-50.4622	Salmo salar (Atlantic salmon).	Eukaryota; Metazoa; Chordata; Craniata; Vertebrata; Euteleostomi;Actinopterygii; Neopterygii; Teleostei; Protacanthopterygii;Salmoniformes; Salmonidae; Salmoninae; Salmo.	8030
C0HA52	MVP	Major vault protein	7.41289	-0.0948357	-1.06794	-94.6453	Salmo salar (Atlantic salmon).	Eukaryota; Metazoa; Chordata; Craniata; Vertebrata; Euteleostomi;Actinopterygii; Neopterygii; Teleostei; Protacanthopterygii;Salmoniformes; Salmonidae; Salmoninae; Salmo.	8030
B5X3Q6	RL4A	60S ribosomal protein L4-A	7.51196	-0.0917957	-1.0657	-44.0975	Salmo salar (Atlantic salmon).	Eukaryota; Metazoa; Chordata; Craniata; Vertebrata; Euteleostomi;Actinopterygii; Neopterygii; Teleostei; Protacanthopterygii;Salmoniformes; Salmonidae; Salmoninae; Salmo.	8030
B5X7R3	RL19	Ribosomal protein L19	7.79015	-0.0904773	-1.06472	-66.4303	Salmo salar (Atlantic salmon).	Eukaryota; Metazoa; Chordata; Craniata; Vertebrata; Euteleostomi;Actinopterygii; Neopterygii; Teleostei; Protacanthopterygii;Salmoniformes; Salmonidae; Salmoninae; Salmo.	8030
B5DFV6	ctsd	Cathepsin D	6.37529	-0.0871608	-1.06228	-12.4492	Salmo salar (Atlantic salmon).	Eukaryota; Metazoa; Chordata; Craniata; Vertebrata; Euteleostomi;Actinopterygii; Neopterygii; Teleostei; Protacanthopterygii;Salmoniformes; Salmonidae; Salmoninae; Salmo.	8030
B5X3U6	HSP70	Heat shock cognate 70 kDa protein	8.07593	-0.034072	-1.0239	-253.909	Salmo salar (Atlantic salmon).	Eukaryota; Metazoa; Chordata; Craniata; Vertebrata; Euteleostomi;Actinopterygii; Neopterygii; Teleostei; Protacanthopterygii;Salmoniformes; Salmonidae; Salmoninae; Salmo.	8030
C0PU35	GELS	Gelsolin	6.71128	-0.0247065	-1.01727	-18.946	Salmo salar (Atlantic salmon).	Eukaryota; Metazoa; Chordata; Craniata; Vertebrata; Euteleostomi;Actinopterygii; Neopterygii; Teleostei; Protacanthopterygii;Salmoniformes; Salmonidae; Salmoninae; Salmo.	8030
B5X4S9	CLIC4	Chloride intracellular channel protein	7.22155	-0.013215	-1.0092	-62.4566	Salmo salar (Atlantic salmon).	Eukaryota; Metazoa; Chordata; Craniata; Vertebrata; Euteleostomi;Actinopterygii; Neopterygii; Teleostei; Protacanthopterygii;Salmoniformes; Salmonidae; Salmoninae; Salmo.	8030
B5X232	PTBP2	Polypyrimidine tract-binding protein 2	6.05769	0.01422	1.00991	-9.40173	Salmo salar (Atlantic salmon).	Eukaryota; Metazoa; Chordata; Craniata; Vertebrata; Euteleostomi;Actinopterygii; Neopterygii; Teleostei; Protacanthopterygii;Salmoniformes; Salmonidae; Salmoninae; Salmo.	8030
B5X4H4	RL7	60S ribosomal protein L7	7.78855	0.0422363	1.02971	-64.5005	Salmo salar (Atlantic salmon).	Eukaryota; Metazoa; Chordata; Craniata; Vertebrata; Euteleostomi;Actinopterygii; Neopterygii; Teleostei; Protacanthopterygii;Salmoniformes; Salmonidae; Salmoninae; Salmo.	8030
C0H8X4	PTBP1	Polypyrimidine tract-binding protein 1	6.88405	0.0775728	1.05524	-37.5423	Salmo salar (Atlantic salmon).	Eukaryota; Metazoa; Chordata; Craniata; Vertebrata; Euteleostomi;Actinopterygii; Neopterygii; Teleostei; Protacanthopterygii;Salmoniformes; Salmonidae; Salmoninae; Salmo.	8030
B9EL76	PPIF	Peptidyl-prolyl cis-trans isomerase	7.51253	0.0931152	1.06667	-39.1225	Salmo salar (Atlantic salmon).	Eukaryota; Metazoa; Chordata; Craniata; Vertebrata; Euteleostomi;Actinopterygii; Neopterygii; Teleostei; Protacanthopterygii;Salmoniformes; Salmonidae; Salmoninae; Salmo.	8030
C0H9C3	EF1A	Elongation factor 1-alpha	8.35912	0.0960161	1.06882	-153.274	Salmo salar (Atlantic salmon).	Eukaryota; Metazoa; Chordata; Craniata; Vertebrata; Euteleostomi;Actinopterygii; Neopterygii; Teleostei; Protacanthopterygii;Salmoniformes; Salmonidae; Salmoninae; Salmo.	8030
C0H8V6	P2RY8	P2Y purinoceptor 8	5.68012	0.0980711	1.07034	-4.81768	Salmo salar (Atlantic salmon).	Eukaryota; Metazoa; Chordata; Craniata; Vertebrata; Euteleostomi;Actinopterygii; Neopterygii; Teleostei; Protacanthopterygii;Salmoniformes; Salmonidae; Salmoninae; Salmo.	8030
D0QEL0		Protein disulfide-isomerase	7.79463	0.114925	1.08292	-91.8582	Salmo salar (Atlantic salmon).	Eukaryota; Metazoa; Chordata; Craniata; Vertebrata; Euteleostomi;Actinopterygii; Neopterygii; Teleostei; Protacanthopterygii;Salmoniformes; Salmonidae; Salmoninae; Salmo.	8030
B5XEX1	ciapin1-1	Anamorsin-A	5.99405	0.162415	1.11916	-5.24527	Salmo salar (Atlantic salmon).	Eukaryota; Metazoa; Chordata; Craniata; Vertebrata; Euteleostomi;Actinopterygii; Neopterygii; Teleostei; Protacanthopterygii;Salmoniformes; Salmonidae; Salmoninae; Salmo.	8030
B5DGD5	arpc2	Actin related protein 2/3 complex subunit 2	6.40642	0.178695	1.13186	-25.4185	Salmo salar (Atlantic salmon).	Eukaryota; Metazoa; Chordata; Craniata; Vertebrata; Euteleostomi;Actinopterygii; Neopterygii; Teleostei; Protacanthopterygii;Salmoniformes; Salmonidae; Salmoninae; Salmo.	8030
B5DFX7	hspa8	Heat shock cognate 70 kDa protein	8.20525	0.187202	1.13855	-290.888	Salmo salar (Atlantic salmon).	Eukaryota; Metazoa; Chordata; Craniata; Vertebrata; Euteleostomi;Actinopterygii; Neopterygii; Teleostei; Protacanthopterygii;Salmoniformes; Salmonidae; Salmoninae; Salmo.	8030
B5XCY4	143B1	14-3-3 protein beta/alpha-1	8.08187	0.189958	1.14073	-216.816	Salmo salar (Atlantic salmon).	Eukaryota; Metazoa; Chordata; Craniata; Vertebrata; Euteleostomi;Actinopterygii; Neopterygii; Teleostei; Protacanthopterygii;Salmoniformes; Salmonidae; Salmoninae; Salmo.	8030
B5RI37	eef1g	Eukaryotic translation elongation factor 1 gamma	6.8388	0.242927	1.18339	-29.7842	Salmo salar (Atlantic salmon).	Eukaryota; Metazoa; Chordata; Craniata; Vertebrata; Euteleostomi;Actinopterygii; Neopterygii; Teleostei; Protacanthopterygii;Salmoniformes; Salmonidae; Salmoninae; Salmo.	8030
C0PUU5	CALR	Calreticulin	7.82651	0.256155	1.19429	-90.9051	Salmo salar (Atlantic salmon).	Eukaryota; Metazoa; Chordata; Craniata; Vertebrata; Euteleostomi;Actinopterygii; Neopterygii; Teleostei; Protacanthopterygii;Salmoniformes; Salmonidae; Salmoninae; Salmo.	8030
B5X6L7	PPT1	Palmitoyl-protein thioesterase 1	6.40323	0.295608	1.2274	-12.7913	Salmo salar (Atlantic salmon).	Eukaryota; Metazoa; Chordata; Craniata; Vertebrata; Euteleostomi;Actinopterygii; Neopterygii; Teleostei; Protacanthopterygii;Salmoniformes; Salmonidae; Salmoninae; Salmo.	8030
B5RI22	anxa6	Annexin	7.25335	0.299584	1.23079	-98.2934	Salmo salar (Atlantic salmon).	Eukaryota; Metazoa; Chordata; Craniata; Vertebrata; Euteleostomi;Actinopterygii; Neopterygii; Teleostei; Protacanthopterygii;Salmoniformes; Salmonidae; Salmoninae; Salmo.	8030
B5XDR0	PPIE	Peptidyl-prolyl cis-trans isomerase E	7.48247	0.30772	1.23775	-31.5204	Salmo salar (Atlantic salmon).	Eukaryota; Metazoa; Chordata; Craniata; Vertebrata; Euteleostomi;Actinopterygii; Neopterygii; Teleostei; Protacanthopterygii;Salmoniformes; Salmonidae; Salmoninae; Salmo.	8030
B5XA68	THOC4	THO complex subunit 4	6.90645	0.336491	1.26268	-78.4671	Salmo salar (Atlantic salmon).	Eukaryota; Metazoa; Chordata; Craniata; Vertebrata; Euteleostomi;Actinopterygii; Neopterygii; Teleostei; Protacanthopterygii;Salmoniformes; Salmonidae; Salmoninae; Salmo.	8030
B9ELH2	COF2	Cofilin-2	7.80676	0.361601	1.28485	-285.869	Salmo salar (Atlantic salmon).	Eukaryota; Metazoa; Chordata; Craniata; Vertebrata; Euteleostomi;Actinopterygii; Neopterygii; Teleostei; Protacanthopterygii;Salmoniformes; Salmonidae; Salmoninae; Salmo.	8030
B5X186	calua	Calumenin-A	7.72905	0.372425	1.29453	-97.6726	Salmo salar (Atlantic salmon).	Eukaryota; Metazoa; Chordata; Craniata; Vertebrata; Euteleostomi;Actinopterygii; Neopterygii; Teleostei; Protacanthopterygii;Salmoniformes; Salmonidae; Salmoninae; Salmo.	8030
B5XFU8	TAGL2	Transgelin	7.2606	0.401327	1.32072	-18.2356	Salmo salar (Atlantic salmon).	Eukaryota; Metazoa; Chordata; Craniata; Vertebrata; Euteleostomi;Actinopterygii; Neopterygii; Teleostei; Protacanthopterygii;Salmoniformes; Salmonidae; Salmoninae; Salmo.	8030
B5X2M8	TCPB	T-complex protein 1 subunit beta	7.02735	0.402932	1.32219	-28.83	Salmo salar (Atlantic salmon).	Eukaryota; Metazoa; Chordata; Craniata; Vertebrata; Euteleostomi;Actinopterygii; Neopterygii; Teleostei; Protacanthopterygii;Salmoniformes; Salmonidae; Salmoninae; Salmo.	8030
B9EM17	TALDO	Transaldolase	7.83553	0.415483	1.33375	-113.532	Salmo salar (Atlantic salmon).	Eukaryota; Metazoa; Chordata; Craniata; Vertebrata; Euteleostomi;Actinopterygii; Neopterygii; Teleostei; Protacanthopterygii;Salmoniformes; Salmonidae; Salmoninae; Salmo.	8030
B5XDN5	NXT2	NTF2-related export protein 2	6.36911	0.421568	1.33938	-6.15062	Salmo salar (Atlantic salmon).	Eukaryota; Metazoa; Chordata; Craniata; Vertebrata; Euteleostomi;Actinopterygii; Neopterygii; Teleostei; Protacanthopterygii;Salmoniformes; Salmonidae; Salmoninae; Salmo.	8030
B5DGV3	RL15	Ribosomal protein L15	7.88859	0.431057	1.34822	-53.268	Salmo salar (Atlantic salmon).	Eukaryota; Metazoa; Chordata; Craniata; Vertebrata; Euteleostomi;Actinopterygii; Neopterygii; Teleostei; Protacanthopterygii;Salmoniformes; Salmonidae; Salmoninae; Salmo.	8030
C0HAL2	EF1A2	Elongation factor 1-alpha	8.51076	0.432079	1.34918	-337.191	Salmo salar (Atlantic salmon).	Eukaryota; Metazoa; Chordata; Craniata; Vertebrata; Euteleostomi;Actinopterygii; Neopterygii; Teleostei; Protacanthopterygii;Salmoniformes; Salmonidae; Salmoninae; Salmo.	8030
B5XAM9	MDHM	Malate dehydrogenase	7.22354	0.50551	1.41963	-70.1411	Salmo salar (Atlantic salmon).	Eukaryota; Metazoa; Chordata; Craniata; Vertebrata; Euteleostomi;Actinopterygii; Neopterygii; Teleostei; Protacanthopterygii;Salmoniformes; Salmonidae; Salmoninae; Salmo.	8030
C0HBH7	FKB10	FK506-binding protein 10	6.85758	0.506681	1.42078	-47.641	Salmo salar (Atlantic salmon).	Eukaryota; Metazoa; Chordata; Craniata; Vertebrata; Euteleostomi;Actinopterygii; Neopterygii; Teleostei; Protacanthopterygii;Salmoniformes; Salmonidae; Salmoninae; Salmo.	8030
B5DG02	rpl9	60S ribosomal protein L9	7.19892	0.518097	1.43206	-52.994	Salmo salar (Atlantic salmon).	Eukaryota; Metazoa; Chordata; Craniata; Vertebrata; Euteleostomi;Actinopterygii; Neopterygii; Teleostei; Protacanthopterygii;Salmoniformes; Salmonidae; Salmoninae; Salmo.	8030
C0HB50	DDX5	Probable ATP-dependent RNA helicase DDX5	6.58183	0.534091	1.44803	-14.6314	Salmo salar (Atlantic salmon).	Eukaryota; Metazoa; Chordata; Craniata; Vertebrata; Euteleostomi;Actinopterygii; Neopterygii; Teleostei; Protacanthopterygii;Salmoniformes; Salmonidae; Salmoninae; Salmo.	8030
B5X9L4	PRDX4	Peroxiredoxin-4	7.32983	0.537626	1.45158	-77.6665	Salmo salar (Atlantic salmon).	Eukaryota; Metazoa; Chordata; Craniata; Vertebrata; Euteleostomi;Actinopterygii; Neopterygii; Teleostei; Protacanthopterygii;Salmoniformes; Salmonidae; Salmoninae; Salmo.	8030
B5XFZ3	ACT	Actin, adductor muscle	8.718	0.546307	1.46034	-372.549	Salmo salar (Atlantic salmon).	Eukaryota; Metazoa; Chordata; Craniata; Vertebrata; Euteleostomi;Actinopterygii; Neopterygii; Teleostei; Protacanthopterygii;Salmoniformes; Salmonidae; Salmoninae; Salmo.	8030
B5DGC6	nme1	Nucleoside diphosphate kinase	7.63409	0.552581	1.46671	-43.1228	Salmo salar (Atlantic salmon).	Eukaryota; Metazoa; Chordata; Craniata; Vertebrata; Euteleostomi;Actinopterygii; Neopterygii; Teleostei; Protacanthopterygii;Salmoniformes; Salmonidae; Salmoninae; Salmo.	8030
C0PU50	MYH9	Myosin-9	8.39378	0.562044	1.47636	-208.333	Salmo salar (Atlantic salmon).	Eukaryota; Metazoa; Chordata; Craniata; Vertebrata; Euteleostomi;Actinopterygii; Neopterygii; Teleostei; Protacanthopterygii;Salmoniformes; Salmonidae; Salmoninae; Salmo.	8030
C0H7V4	EF1G	Elongation factor 1-gamma	6.89685	0.580775	1.49565	-18.3604	Salmo salar (Atlantic salmon).	Eukaryota; Metazoa; Chordata; Craniata; Vertebrata; Euteleostomi;Actinopterygii; Neopterygii; Teleostei; Protacanthopterygii;Salmoniformes; Salmonidae; Salmoninae; Salmo.	8030
B5XE85	LRRC1	Leucine-rich repeat-containing protein 1	6.353	0.586514	1.50161	-6.56601	Salmo salar (Atlantic salmon).	Eukaryota; Metazoa; Chordata; Craniata; Vertebrata; Euteleostomi;Actinopterygii; Neopterygii; Teleostei; Protacanthopterygii;Salmoniformes; Salmonidae; Salmoninae; Salmo.	8030
B5XAM0	TYB12	Thymosin beta-12	8.27078	0.612699	1.52912	-169.423	Salmo salar (Atlantic salmon).	Eukaryota; Metazoa; Chordata; Craniata; Vertebrata; Euteleostomi;Actinopterygii; Neopterygii; Teleostei; Protacanthopterygii;Salmoniformes; Salmonidae; Salmoninae; Salmo.	8030
B5XFY9	EF1D	Elongation factor 1-delta	6.89527	0.630391	1.54798	-11.4828	Salmo salar (Atlantic salmon).	Eukaryota; Metazoa; Chordata; Craniata; Vertebrata; Euteleostomi;Actinopterygii; Neopterygii; Teleostei; Protacanthopterygii;Salmoniformes; Salmonidae; Salmoninae; Salmo.	8030
B9ELY8	RL12	60S ribosomal protein L12	6.22517	0.672623	1.59397	-18.7696	Salmo salar (Atlantic salmon).	Eukaryota; Metazoa; Chordata; Craniata; Vertebrata; Euteleostomi;Actinopterygii; Neopterygii; Teleostei; Protacanthopterygii;Salmoniformes; Salmonidae; Salmoninae; Salmo.	8030
B5X1G1	ANX13	Annexin	6.65912	0.789835	1.72888	-40.9638	Salmo salar (Atlantic salmon).	Eukaryota; Metazoa; Chordata; Craniata; Vertebrata; Euteleostomi;Actinopterygii; Neopterygii; Teleostei; Protacanthopterygii;Salmoniformes; Salmonidae; Salmoninae; Salmo.	8030
B5X130	NPL	N-acetylneuraminate lyase	6.50753	0.835491	1.78446	-12.7922	Salmo salar (Atlantic salmon).	Eukaryota; Metazoa; Chordata; Craniata; Vertebrata; Euteleostomi;Actinopterygii; Neopterygii; Teleostei; Protacanthopterygii;Salmoniformes; Salmonidae; Salmoninae; Salmo.	8030
B5X386	PSD12	26S proteasome non-ATPase regulatory subunit 12	6.31471	0.843494	1.79439	-11.1379	Salmo salar (Atlantic salmon).	Eukaryota; Metazoa; Chordata; Craniata; Vertebrata; Euteleostomi;Actinopterygii; Neopterygii; Teleostei; Protacanthopterygii;Salmoniformes; Salmonidae; Salmoninae; Salmo.	8030
U5KQM7		Heat shock protein 90-alpha 2	7.72461	0.882827	1.84399	-54.574	Salmo salar (Atlantic salmon).	Eukaryota; Metazoa; Chordata; Craniata; Vertebrata; Euteleostomi;Actinopterygii; Neopterygii; Teleostei; Protacanthopterygii;Salmoniformes; Salmonidae; Salmoninae; Salmo.	8030
C0H9X1	VATA	Vacuolar ATP synthase catalytic subunit A	6.65572	0.888895	1.85176	-31.3572	Salmo salar (Atlantic salmon).	Eukaryota; Metazoa; Chordata; Craniata; Vertebrata; Euteleostomi;Actinopterygii; Neopterygii; Teleostei; Protacanthopterygii;Salmoniformes; Salmonidae; Salmoninae; Salmo.	8030
B5X3R3	CAPZB	F-actin-capping protein subunit beta	7.39672	0.89035	1.85363	-56.8298	Salmo salar (Atlantic salmon).	Eukaryota; Metazoa; Chordata; Craniata; Vertebrata; Euteleostomi;Actinopterygii; Neopterygii; Teleostei; Protacanthopterygii;Salmoniformes; Salmonidae; Salmoninae; Salmo.	8030
B5XCJ8	NDKA	Nucleoside diphosphate kinase	8.00973	0.891758	1.85544	-109.912	Salmo salar (Atlantic salmon).	Eukaryota; Metazoa; Chordata; Craniata; Vertebrata; Euteleostomi;Actinopterygii; Neopterygii; Teleostei; Protacanthopterygii;Salmoniformes; Salmonidae; Salmoninae; Salmo.	8030
C0HB84	MOES	Moesin	8.15538	0.94118	1.9201	-290.83	Salmo salar (Atlantic salmon).	Eukaryota; Metazoa; Chordata; Craniata; Vertebrata; Euteleostomi;Actinopterygii; Neopterygii; Teleostei; Protacanthopterygii;Salmoniformes; Salmonidae; Salmoninae; Salmo.	8030
B5DG30	hsp70-3	Heat shock protein 70 isoform 3	7.56075	0.977807	1.96947	-86.1541	Salmo salar (Atlantic salmon).	Eukaryota; Metazoa; Chordata; Craniata; Vertebrata; Euteleostomi;Actinopterygii; Neopterygii; Teleostei; Protacanthopterygii;Salmoniformes; Salmonidae; Salmoninae; Salmo.	8030
B5X1B5	ENOA	Alpha-enolase	8.39858	0.986592	1.9815	-325.75	Salmo salar (Atlantic salmon).	Eukaryota; Metazoa; Chordata; Craniata; Vertebrata; Euteleostomi;Actinopterygii; Neopterygii; Teleostei; Protacanthopterygii;Salmoniformes; Salmonidae; Salmoninae; Salmo.	8030
B5XDP1	RLA0	60S acidic ribosomal protein P0	7.579	1.00069	2.00095	-123.933	Salmo salar (Atlantic salmon).	Eukaryota; Metazoa; Chordata; Craniata; Vertebrata; Euteleostomi;Actinopterygii; Neopterygii; Teleostei; Protacanthopterygii;Salmoniformes; Salmonidae; Salmoninae; Salmo.	8030
B5X3E6	SPRE	Sepiapterin reductase	6.60745	1.04118	2.05791	-23.4763	Salmo salar (Atlantic salmon).	Eukaryota; Metazoa; Chordata; Craniata; Vertebrata; Euteleostomi;Actinopterygii; Neopterygii; Teleostei; Protacanthopterygii;Salmoniformes; Salmonidae; Salmoninae; Salmo.	8030
B5X865	ANX2A	Annexin	8.59568	1.0443	2.06237	-460.97	Salmo salar (Atlantic salmon).	Eukaryota; Metazoa; Chordata; Craniata; Vertebrata; Euteleostomi;Actinopterygii; Neopterygii; Teleostei; Protacanthopterygii;Salmoniformes; Salmonidae; Salmoninae; Salmo.	8030
C0HAB6	HS90A	Heat shock protein 90-alpha 1	7.78862	1.05913	2.08368	-69.8109	Salmo salar (Atlantic salmon).	Eukaryota; Metazoa; Chordata; Craniata; Vertebrata; Euteleostomi;Actinopterygii; Neopterygii; Teleostei; Protacanthopterygii;Salmoniformes; Salmonidae; Salmoninae; Salmo.	8030
B5DGE0	ahcy	Adenosylhomocysteinase	7.45195	1.07009	2.09956	-65.8831	Salmo salar (Atlantic salmon).	Eukaryota; Metazoa; Chordata; Craniata; Vertebrata; Euteleostomi;Actinopterygii; Neopterygii; Teleostei; Protacanthopterygii;Salmoniformes; Salmonidae; Salmoninae; Salmo.	8030
B5X4R5	ODPA	Pyruvate dehydrogenase E1 component subunit alpha	6.94908	1.07796	2.11105	-22.7847	Salmo salar (Atlantic salmon).	Eukaryota; Metazoa; Chordata; Craniata; Vertebrata; Euteleostomi;Actinopterygii; Neopterygii; Teleostei; Protacanthopterygii;Salmoniformes; Salmonidae; Salmoninae; Salmo.	8030
B5X0W2	GDIR	Rho GDP-dissociation inhibitor 1	8.17021	1.09426	2.13504	-123.404	Salmo salar (Atlantic salmon).	Eukaryota; Metazoa; Chordata; Craniata; Vertebrata; Euteleostomi;Actinopterygii; Neopterygii; Teleostei; Protacanthopterygii;Salmoniformes; Salmonidae; Salmoninae; Salmo.	8030
B5XEY5	H2B1A	Histone H2B	7.7978	1.10853	2.15626	-26.7872	Salmo salar (Atlantic salmon).	Eukaryota; Metazoa; Chordata; Craniata; Vertebrata; Euteleostomi;Actinopterygii; Neopterygii; Teleostei; Protacanthopterygii;Salmoniformes; Salmonidae; Salmoninae; Salmo.	8030
B5XA06	PFD3	Prefoldin subunit 3	6.50409	1.17624	2.25986	-30.9704	Salmo salar (Atlantic salmon).	Eukaryota; Metazoa; Chordata; Craniata; Vertebrata; Euteleostomi;Actinopterygii; Neopterygii; Teleostei; Protacanthopterygii;Salmoniformes; Salmonidae; Salmoninae; Salmo.	8030
I0J1J3	aldA	Fructose-bisphosphate aldolase	6.72325	1.1773	2.26154	-13.1093	Salmo salar (Atlantic salmon).	Eukaryota; Metazoa; Chordata; Craniata; Vertebrata; Euteleostomi;Actinopterygii; Neopterygii; Teleostei; Protacanthopterygii;Salmoniformes; Salmonidae; Salmoninae; Salmo.	8030
B5X6N3	PSA2	Proteasome subunit alpha type	7.55895	1.17938	2.26479	-85.6103	Salmo salar (Atlantic salmon).	Eukaryota; Metazoa; Chordata; Craniata; Vertebrata; Euteleostomi;Actinopterygii; Neopterygii; Teleostei; Protacanthopterygii;Salmoniformes; Salmonidae; Salmoninae; Salmo.	8030
P84408		Histone H1	8.01045	1.19541	2.29009	-27.845	Salmo salar (Atlantic salmon).	Eukaryota; Metazoa; Chordata; Craniata; Vertebrata; Euteleostomi;Actinopterygii; Neopterygii; Teleostei; Protacanthopterygii;Salmoniformes; Salmonidae; Salmoninae; Salmo.	8030
B5X3H7	TBB3	Tubulin beta-3 chain	8.21205	1.27362	2.41768	-74.5323	Salmo salar (Atlantic salmon).	Eukaryota; Metazoa; Chordata; Craniata; Vertebrata; Euteleostomi;Actinopterygii; Neopterygii; Teleostei; Protacanthopterygii;Salmoniformes; Salmonidae; Salmoninae; Salmo.	8030
B9EN30	TBB2C	Tubulin beta-2C chain	8.29663	1.28241	2.43245	-153.292	Salmo salar (Atlantic salmon).	Eukaryota; Metazoa; Chordata; Craniata; Vertebrata; Euteleostomi;Actinopterygii; Neopterygii; Teleostei; Protacanthopterygii;Salmoniformes; Salmonidae; Salmoninae; Salmo.	8030
B5X9N0	MYL6	Myosin light polypeptide 6	7.86974	1.30294	2.46732	-107.047	Salmo salar (Atlantic salmon).	Eukaryota; Metazoa; Chordata; Craniata; Vertebrata; Euteleostomi;Actinopterygii; Neopterygii; Teleostei; Protacanthopterygii;Salmoniformes; Salmonidae; Salmoninae; Salmo.	8030
A0A0G3B776		Iodothyronine deiodinase	5.97384	1.30316	2.46768	-7.01671	Salmo salar (Atlantic salmon).	Eukaryota; Metazoa; Chordata; Craniata; Vertebrata; Euteleostomi;Actinopterygii; Neopterygii; Teleostei; Protacanthopterygii;Salmoniformes; Salmonidae; Salmoninae; Salmo.	8030
B5DH24		26S proteasome non-ATPase regulatory subunit 7 like 1	6.28777	1.31575	2.48932	-24.2775	Salmo salar (Atlantic salmon).	Eukaryota; Metazoa; Chordata; Craniata; Vertebrata; Euteleostomi;Actinopterygii; Neopterygii; Teleostei; Protacanthopterygii;Salmoniformes; Salmonidae; Salmoninae; Salmo.	8030
B5XFE9	TBA1A	Tubulin alpha-1A chain	8.06671	1.31739	2.49215	-152.486	Salmo salar (Atlantic salmon).	Eukaryota; Metazoa; Chordata; Craniata; Vertebrata; Euteleostomi;Actinopterygii; Neopterygii; Teleostei; Protacanthopterygii;Salmoniformes; Salmonidae; Salmoninae; Salmo.	8030
C0PUG5	HSP74	Heat shock 70 kDa protein 4	6.49317	1.34058	2.53254	-13.0356	Salmo salar (Atlantic salmon).	Eukaryota; Metazoa; Chordata; Craniata; Vertebrata; Euteleostomi;Actinopterygii; Neopterygii; Teleostei; Protacanthopterygii;Salmoniformes; Salmonidae; Salmoninae; Salmo.	8030
B5XGI9	PSA3	Proteasome subunit alpha type	7.03446	1.35443	2.55695	-48.0769	Salmo salar (Atlantic salmon).	Eukaryota; Metazoa; Chordata; Craniata; Vertebrata; Euteleostomi;Actinopterygii; Neopterygii; Teleostei; Protacanthopterygii;Salmoniformes; Salmonidae; Salmoninae; Salmo.	8030
B5XFN3	MYL6B	Myosin light polypeptide 6B	7.86158	1.39917	2.6375	-107.047	Salmo salar (Atlantic salmon).	Eukaryota; Metazoa; Chordata; Craniata; Vertebrata; Euteleostomi;Actinopterygii; Neopterygii; Teleostei; Protacanthopterygii;Salmoniformes; Salmonidae; Salmoninae; Salmo.	8030
A7KIL2	RPS18	40S ribosomal protein S18	7.32042	1.40491	2.64802	-62.572	Salmo salar (Atlantic salmon).	Eukaryota; Metazoa; Chordata; Craniata; Vertebrata; Euteleostomi;Actinopterygii; Neopterygii; Teleostei; Protacanthopterygii;Salmoniformes; Salmonidae; Salmoninae; Salmo.	8030
C0H808	TBB1	Tubulin beta-1 chain	8.32795	1.41558	2.66767	-169.613	Salmo salar (Atlantic salmon).	Eukaryota; Metazoa; Chordata; Craniata; Vertebrata; Euteleostomi;Actinopterygii; Neopterygii; Teleostei; Protacanthopterygii;Salmoniformes; Salmonidae; Salmoninae; Salmo.	8030
B5DH02		Tubulin, alpha 8 like 3-2	8.09675	1.45535	2.74223	-205.792	Salmo salar (Atlantic salmon).	Eukaryota; Metazoa; Chordata; Craniata; Vertebrata; Euteleostomi;Actinopterygii; Neopterygii; Teleostei; Protacanthopterygii;Salmoniformes; Salmonidae; Salmoninae; Salmo.	8030
B5X4I8	KPYK	Pyruvate kinase	8.71929	1.46687	2.76421	-480.847	Salmo salar (Atlantic salmon).	Eukaryota; Metazoa; Chordata; Craniata; Vertebrata; Euteleostomi;Actinopterygii; Neopterygii; Teleostei; Protacanthopterygii;Salmoniformes; Salmonidae; Salmoninae; Salmo.	8030
B5X5S8	RL5	60S ribosomal protein L5	7.83252	1.54336	2.91472	-88.3774	Salmo salar (Atlantic salmon).	Eukaryota; Metazoa; Chordata; Craniata; Vertebrata; Euteleostomi;Actinopterygii; Neopterygii; Teleostei; Protacanthopterygii;Salmoniformes; Salmonidae; Salmoninae; Salmo.	8030
B5DH01	TBA	Tubulin alpha chain	8.15756	1.54966	2.92749	-227.37	Salmo salar (Atlantic salmon).	Eukaryota; Metazoa; Chordata; Craniata; Vertebrata; Euteleostomi;Actinopterygii; Neopterygii; Teleostei; Protacanthopterygii;Salmoniformes; Salmonidae; Salmoninae; Salmo.	8030
[truncated: 995 more rows]

## Sheet: SHK.Propagation vs.Control
Protein	Gene name	Description	log10 Average Intensity	log 2 Ratio propagation/control	Fold Change propagation/control	best E-value	up_os	up_oc	ncbi_taxid
[truncated: 1,135 more rows]

[truncated: 1 more sheets: SHK.Propagationvs.Vacuolization]
