# Supplementary material for: Global Proteomic Profiling of <em>Piscirickettsia</em> <em>Salmonis</em> and Salmon Macrophage-Like Cells during Intracellular Infection
Source: Preprints.org preprint supplement (doi:10.20944/preprints202009.0106.v1), 2020-09-04
Supplement: Supplementary file 4 [file TableS2.xlsx]

## Sheet: Hoja1
Table S2. Primers used for qPCR analyses
Gene name	Locus tag	F-primer	R-primer
icmV	PSLF89_RS24320	CATTGATGACGGCAATTATAGG	CAAGCTGGCCGACTTTAATC
icmV	PSLF89_RS30760	GACAGCAATTGTTGGTGCTG	CATTCCCAAATAACCGCACT
relE	PSLF89_RS34200	TAAGAGCGCTCGGTTATCGT	AGCTGAATTGTGCCTGGAAT
xre	PSLF89_RS35555	AGCAGAAGACGTGACCGAGT	TGACTATGCAGGCCAAAATG
hemL	PSLF89_RS35745	TGGTGCACTCCTGATCTTTG	CAACAGGCATACCTCCACCT
pgi	PSLF89_RS21030	CGGCACAAATCAATCATCAC	ACCCAGTCCCACATTGGTAA
luxR	PSLF89_RS21790	AAGCAGGTGCTGCAGGTTAT	CTGCGCAACATCAGGACTAA
pbp1A	PSLF89_RS33080	CTAAGCGCACCCAAGAACTC	GACGGTGGTGACAACATCTG
rpoD	PSLF89_RS22625	CCTGGCTCCAGAAGTGACTC	CCTTGGCCTCACCAATAGAA
relA	PSLF89_RS22790	TGCGTATTATGGTCGGTGAA	ACCATTTTCTTTTGGCGTTG
ompA	PSLF89_RS23070	CCCCAGCTTTCACCATTAAA	AATTGGATAGTGCCCAGCAG
dot	PSLF89_RS23250	AGGAAAGCCCAAAGAAGAGC	GTCAGAGCCGAGGAAAACAG
fliC	PSLF89_RS23485	CACTGATCGCGCAAATCTAA	ATTGCGCTGCCTGTAATACC
icmK	PSLF89_RS24220	CCGTGCAGGTCTGGTCTTAT	AGAAGGCGTTGCTGTCAACT
icmG	PSLF89_RS24230	AAGGCCGATGTTGCATTATT	GCCTTTCGCTGACTTACTGC
dotB	PSLF89_RS24255	CAGTCGTGAGCCAAAGTGAA	ATAACCGCCTCAAGTGTTGG
icmP	PSLF89_RS24275	TCGACGACCCATGATATGAA	TTTCTTCACCAACCCAAACC
icmB	PSLF89_RS24290	GATATTGGGCCTTCAAGCAA	GCCCCTAACTGCGTATCAAA
imcL	PSLF89_RS24310	ATGGCTGGGAGCAGTATTTG	TTTGAGTATCTCGCGAAGCA
fhuF	PSLF89_RS24790	TGGCCATCAGGTTCAATCTT	AACTGGCTTGGGTATTGACG
PSLF89_RS34305	PSLF89_RS34305	TGCACTTGGCAGAGAAAGTG	TGGATTTGCAAGCTCATCAC
ymt	PSLF89_RS34605	ATGTGCAATGGCTATGCTGA	ATCAGGCCAACTTTCCAATG
fic	PSLF89_RS34625	CAGCCTCGTATGATTGACCA	GGCCATTACCATCAGCAAAT
PSLF89_RS34740	PSLF89_RS34740	GGCGTTGGAACTAACGGTAA	GCCTGTTGTAGAGCCACCAT
pipB2 (pPSLF89-1)	PSLF89_RS34855	GCGATGCCACACCTAAATCT	TTCTTGTGGCAAATGAGCAG
pipB2 (pPSLF89-1)	PSLF89_RS34870	TGGGTGGAATCTTGAAGGAG	TTTTTCGCAACAGTGCCTAA
pepO	PSLF89_RS34880	TGAAGACCGTGGATACACACA	GGGAAGAGGTTGAAGAGTCG
PSLF89_RS33895	PSLF89_RS33895	TTGATGAAGCAAAAGCGATG	GGCCATATCGACAGGAACAT
relB	PSLF89_RS34205	ACGCACAACAGTCGGTAACA	GTACGCCGCAGGAACATTAT
rpoS	PSLF89_RS25070	CGCGAGATTTGTCTCAATCA	GCCACAGGATCTGCCATATT
iap/cwha	PSLF89_RS25340	GGTATGACGGACGCTTTGAT	ATAGGCTGCTAAGGCAAGCA
lpxK	PSLF89_RS25880	CACGAGGTTATGGCGCTAAT	GGCACACCCGTTAGTTGTTT
mprA	PSLF89_RS27550	GAGAGCGAGCCTGTCAATCT	CAACCGTAGAGGGATTGCAT
ospD3	PSLF89_RS27860	AGCGGCTTATATCCATGGTG	AATAGGTTTCTGCCGCTTGA
pkn5	PSLF89_RS28440	TTTTGGCTGGAAGAAGGCTA	TGCTGCGATATCTTCGTTTG
cheV	PSLF89_RS28460	GGTGCTGATGCATTTGCTTA	GGCATCTCAGCATCGGTAAT
spoT	PSLF89_RS28815	ATGCTGGACGCGGTATTATC	GACATTTCCACACGAACACG
hicB	PSLF89_RS34985	TGCCACTATCGAAGAGCGTA	AGCGCTGAGCTGTTCTTTCT
waaE	PSLF89_RS29690	GTGAAGGTTTCGGCGTATGT	CCAGAATCCGCGACAATAAT
cadF	PSLF89_RS29915	TGCAGTCATTTGTGCTGGAT	AAACGAAATGGTGCATAGCC
mce2B	PSLF89_RS29945	CGTCCGTTAGAATTGCTGGT	TGCTTGCCGAACTATCATCA
cheY	PSLF89_RS30125	GTTGGGCTCGCCTTATTAGA	AGCAGACACCACATCGGTTT
wzb	PSLF89_RS06185	TTAGCGCTGAGCTGATCAAA	CTTCATTACGCCACCTACCC
PSLF89_RS35225	PSLF89_RS35225	GGAAGACATGGAAGCACACA	TCGTTCCCATTTTGATTGGT
pipB2 (pPSLF89-1)	PSLF89_RS35360	GCGATGCCACACCTAAATCT	TTCTTGTGGCAAATGAGCAG
moeB	PSLF89_RS35380	GGAGTGGATCTGGACCTGTG	AGGCTTGCTGGTCTTGTTGT
icmE	PSLF89_RS30855	CGCTTAAGTGCACAGGATCA	TATCCCAATCACCCACCATT
icmG	PSLF89_RS30850	CCAGGTTAAATTGTTGGTTGC	CAAACCCAGAGCTCGTGATA
dotC	PSLF89_RS30830	CACCTCCTACTTGGCGTGAT	GCCCTTCGGTCAACAATTTA
icmO	PSLF89_RS30815	GTTGAGGGTTTTGCAGTGGT	AGACATACGCCTCACCTGCT
icmJ	PSLF89_RS30800	TGATGATCGCAATGGCTAAA	ACCAGAAACCCGACTCAATG
icmB	PSLF89_RS30790	TGCCGATATTGGCTGATACA	GGGCTCGTTAGTGTTGGAAA
pipB2 (chromosome)	PSLF89_RS19170	ATAACCCACAGGAAGCGATG	CGCTGCTGATGAGTGGATAA
sspA	PSLF89_RS19855	TTTACGCTGGTTGATTGCAG	TGCATCACGAGAAAACAAGC
