# Supplementary material for: Global Proteomic Profiling of <em>Piscirickettsia</em> <em>Salmonis</em> and Salmon Macrophage-Like Cells during Intracellular Infection
Source: Preprints.org preprint supplement (doi:10.20944/preprints202009.0106.v1), 2020-09-04
Supplement: Supplementary file 6 [file TableS4.xlsx]

## Sheet: RT-qPCR P.salmonis
VF family	Gene name	Locus tag	Replicon	found in proteomics?	Vacuolization [average ΔΔCt ± desvest]	Propagation [average ΔΔCt ± desvest]
Adhesins, adherence and adhesion-related proteins	ompA	PSLF89_RS23070	chromosome	control	0,107 ± 0,10	3,34 ± 0,86
Adhesins, adherence and adhesion-related proteins	fliC	PSLF89_RS23485	chromosome	vacuolization	0,217 ± 0,18	0,532 ± 0,22
Adhesins, adherence and adhesion-related proteins	cadF	PSLF89_RS29915	chromosome	vacuolization+propagation	0,171 ± 0,22	1,45 ± 0,24
Antiphagocytosis, capsule	wzb	PSLF89_RS06185	chromosome	propagation	0,551 ± 0,019	1,03 ± 0,37
Cell surface components	pbp1A	PSLF89_RS33080	chromosome	vacuolization+propagation	65,6 ± 14	0,125 ± 0,045
Cell surface components	PSLF89_RS34305	PSLF89_RS34305	pPSLF89-1	propagation	3,54 ± 0,66	4,74 ± 1,3
Cell surface components	PSLF89_RS35225	PSLF89_RS35225	pPSLF89-3	propagation	8,42 ± 1,9	6,09 ± 2,2
Central metabolism	pgi	PSLF89_RS21030	chromosome	control	0,540 ± 0,024	1,19 ± 0,022
Chemotaxis	cheV	PSLF89_RS28460	chromosome	vacuolization+propagation	0,977 ± 0,18	0,721 ± 0,18
Chemotaxis	cheY	PSLF89_RS30125	chromosome	propagation	0,408 ± 0,43	3,86 ± 2,3
Endotoxin	lpxK	PSLF89_RS25880	chromosome	vacuolization	0,435 ± 0,16	0,809 ± 0,15
Endotoxin	waaE	PSLF89_RS29690	chromosome	propagation	0,484 ± 0,048	0,889 ± 0,30
Invasion, intracellular survival	iap/cwha	PSLF89_RS25340	chromosome	vacuolization+propagation	0,709 ± 0,18	1,53 ± 0,19
Invasion, intracellular survival	mce2B	PSLF89_RS29945	chromosome	propagation	0,612 ± 0,22	0,821 ± 0,25
Metal uptake and heme acquisition	fhuF	PSLF89_RS24790	chromosome	vacuolization	0,831 ± 0,085	1,16 ± 0,15
Metal uptake and heme acquisition	moeB	PSLF89_RS35380	pPSLF89-3	vacuolization	1,36 ± 0,34	1,60 ± 0,39
Metal uptake and heme acquisition	hemL	PSLF89_RS35745	pPSLF89-4	no	5,68 ± 2,9	5,35 ± 2,2
Regulation	luxR	PSLF89_RS21790	chromosome	propagation	0,483 ± 0,42	1,68 ± 0,84
Regulation	rpoD	PSLF89_RS22625	chromosome	control	0,130 ± 0,11	4,68 ± 2,3
Regulation	relA	PSLF89_RS22790	chromosome	vacuolization+propagation	0,458 ± 0,044	3,19 ± 0,95
Regulation	rpoS	PSLF89_RS25070	chromosome	no	0,694 ± 0,21	3,10 ± 1,1
Regulation	mprA	PSLF89_RS27550	chromosome	control	1,47 ± 0,42	2,25 ± 0,15
Regulation	spoT	PSLF89_RS28815	chromosome	no	0,634 ± 0,087	3,69 ± 1,3
Regulation	PSLF89_RS33895	PSLF89_RS33895	pPSLF89-1	propagation	1,44 ± 0,59	3,65 ± 0,88
Secretion system	icmV	PSLF89_RS24320	chromosome	propagation	2,58 ± 1,1	2,96 ± 0,74
Secretion system	icmV	PSLF89_RS30760	chromosome	vacuolization	1,11 ± 0,090	5,36 ± 0,79
Secretion system	dot	PSLF89_RS23250	chromosome	propagation	0,168 ± 0,20	6,75 ± 1,4
Secretion system	icmK	PSLF89_RS24220	chromosome	no	0,289 ± 0,13	3,56 ± 0,039
Secretion system	icmG	PSLF89_RS24230	chromosome	no	0,121 ± 0,13	5,30 ± 3,9
Secretion system	dotB	PSLF89_RS24255	chromosome	propagation	1,28 ± 0,43	4,47 ± 0,97
Secretion system	icmP	PSLF89_RS24275	chromosome	no	0,0443 ± 0,050	4,02 ± 2,0
Secretion system	icmB	PSLF89_RS24290	chromosome	no	0,109 ± 0,11	5,24 ± 0,32
Secretion system	imcL	PSLF89_RS24310	chromosome	vacuolization	0,0137 ± 0,014	3,04 ± 1,3
Secretion system	icmE	PSLF89_RS30855	chromosome	vacuolization	0,200 ± 0,15	8,03 ± 1,1
Secretion system	icmG	PSLF89_RS30850	chromosome	vacuolization	0,2684 ± 0,23	9,78 ± 1,3
Secretion system	dotC	PSLF89_RS30830	chromosome	no	0,182 ± 0,31	1,77 ± 0,20
Secretion system	icmO	PSLF89_RS30815	chromosome	no	0,471 ± 0,22	1,58 ± 0,60
Secretion system	icmJ	PSLF89_RS30800	chromosome	propagation	0,337 ± 0,15	0,565 ± 0,25
Secretion system	icmB	PSLF89_RS30790	chromosome	vacuolization	0,203 ± 0,29	3,57 ± 0,87
Stress adaptation	sspA	PSLF89_RS19855	chromosome	propagation	0,678 ± 0,18	0,834 ± 0,18
Toxin, efector protein	pipB2 (chromosome)	PSLF89_RS19170	chromosome	vacuolization	0,676 ± 0,088	1,42 ± 0,15
Toxin, efector protein	ospD3	PSLF89_RS27860	chromosome	propagation	3,30 ± 2,4	4,85 ± 2,1
Toxin, efector protein	pkn5	PSLF89_RS28440	chromosome	vacuolization+propagation	0,242 ± 0,36	3,45 ± 0,53
Toxin, efector protein	ymt	PSLF89_RS34605	pPSLF89-1	propagation	1,45 ± 0,30	3,00 ± 0,79
Toxin, efector protein	fic	PSLF89_RS34625	pPSLF89-1	control+propagation	2,26 ± 1,3	4,68 ± 0,93
Toxin, efector protein	pipB2 (pPSLF89-1)	PSLF89_RS34855	pPSLF89-1	control	7,96 ± 4,1	12,5 ± 7,4
Toxin, efector protein	pipB2 (pPSLF89-1)	PSLF89_RS34870	pPSLF89-1	no	5,31 ± 2,2	11,7 ± 3,8
Toxin, efector protein	pepO	PSLF89_RS34880	pPSLF89-1	no	1,44 ± 0,59	2,53 ± 0,46
Toxin, efector protein	pipB2 (pPSLF89-1)	PSLF89_RS35360	pPSLF89-3	no	2,82 ± 1,5	4,01 ± 2,3
Toxin-antitoxin system	relE	PSLF89_RS34200	pPSLF89-1	no	4,77 ± 1,6	9,24 ± 3,3
Toxin-antitoxin system	relB	PSLF89_RS34205	pPSLF89-1	propagation	3,14 ± 1,4	5,26 ± 2,0
Toxin-antitoxin system	hicB	PSLF89_RS34985	pPSLF89-2	propagation	6,22 ± 1,0	7,86 ± 2,9
Toxin-antitoxin system	xre	PSLF89_RS35555	pPSLF89-4	no	5,19 ± 1,4	4,75 ± 0,81
Unknown	PSLF89_RS34740	PSLF89_RS34740	pPSLF89-1	propagation	2,40 ± 0,68	6,10 ± 2,2
